# Supplementary material for: Microbiota regulate intestinal epithelial gene expression by suppressing the transcription factor Hepatocyte nuclear factor 4 alpha
Source: Genome Res. 2017 Jul;27(7):1195–206. doi: 10.1101/gr.220111.116 (PMC5495071; doi:10.1101/gr.220111.116)
Supplement: Supplemental Material [file supp_gr.220111.116_Supplemental_Table_S1.xlsx]

## Sheet: Supplemental Table S1
Supplemental Table S1: TFs used in Y1H screen (related to Fig. 1 and Supplemental Fig. S1)
All TFs are in pDEST22 - Hnf4a and Hnf4g were not included in the original library screen
ahr1b
arntl1a
arntl1b
Arntl2
bloc1s1
CABZ01057488.1 (Hnf4b)
CABZ01077373.1
cdx4
cebpb
churc1
CLOCK
CLOCK**
creb3l3l
CREM
CRY1A
CRY2A
Cry2B
CRY3
CRY4
CRY5
Cry-Dash
csdc2
DBP (2 of 2)
DBP (1 of 2)
Dec1
Dec2
e2f5
E4bp4-1
E4bp4-2
E4bp4-4
E4bp4-5
E4bp4-6
ecd
ehf
Elgn3
Epas1b
Epas1b (2of2)
esrra
etv5b
farsa
foxa2
foxa3
foxf1
foxj1a
foxk1
foxm1
foxq1
foxq1l
gata1b
gata3
gata4
gata5
gata6
gatad1
gtf3aa
hand2
her 11
her15.2
her9
hey2
Hif1
hif1ab
hif1al2
Hnf4a
Hnf4g
Hif2
hoxb6a
hoxc6b
hoxd10a
hoxd9a
hsf1
hsf2
id2b
ikzf1
irf9
klf11a
klf12a
klf2a
klf7l
klf9
klfd
LASS2 (2 of 2)
mbd3a
mbd3b
MEF2A (2 of 2)
mnx1
mrpl28
msxb
mxd3
mycl1b
neil3
nfe2l2
npas2
nr1d1
NR1D2A
Nr1d2B
Nr1d4a
nr2f2
nr2f6b
Nr5a1b
nr5a1b**
onecut1
Pax9
pax9
pbx4
PER1B
PER2
PER3
phf20a
pias4b
pknox1.1
POU2F2 (1 of 2)
pou6f1
pparab
prdm1a
rcor2
rel
rfx1a
rfx3
RorAA
rorab
Rorb
rorca
rorcb
rpz5
rxrgb
setdb1b
si:dkey-177e13.4
sp5
tbx2a
tbx2b
tcf21
tef
Tef2
TFAP2D
tgif1
thraa
tp63
usf1
usf1l
zeb2a
zfand5a
zgc:110821
zgc:162948
zgc92567
znf143
znf395B
znf511
znf704
znf76
