# Supplementary material for: Microbiota regulate intestinal epithelial gene expression by suppressing the transcription factor Hepatocyte nuclear factor 4 alpha
Source: Genome Res. 2017 Jul;27(7):1195–206. doi: 10.1101/gr.220111.116 (PMC5495071; doi:10.1101/gr.220111.116)
Supplement: Supplemental Material [file supp_gr.220111.116_Supplemental_Table_S2.xlsx]

## Sheet: Supplemental Table S2
Supplemental Table S2: Cuffdiff results from gnotobiotic WT and mutant zebrafish RNA-seq (related to Fig. 2, Fig. 5 and Supplemental Fig. S3)
test_id	gene_id	gene	locus	WTCV	WTGF	WTGF/WTCVlog2(fold_change)	p_value	significant	MutCV	MutGF	MutGF/MutCVFlog2(fold_change)	p_value	significant	MutCV	WTCV	WTCV/MutCVLog2(fold_change)	p_value	significant	MutGF	WTGF	WTGF/MutGFLog2(fold_change)	p_value	significant	WTCV/WTGF Log2(FC)	MutCV/MutGF Log2(FC)	MutCV/WTCV Log2(FC)	MutGF/WTGF Log2(FC)	MutCV/MutGF Pass 1.75 FC cut off?	MutCV/MutGF Pass 1.75 FC cut off?	MutCV/WTCV Pass 1.75 FC cut off?	MutGF/WTGF Pass 1.75 FC cut off?
ENSDARG00000079361	ENSDARG00000079361	abcg2b	chr1:7749144-7768053	24.326	13.6899	-0.829386	0.0002	yes	22.2332	51.9731	1.22505	5e-05	yes	19.8669	30.6389	0.624997	0.0128	yes	38.3029	13.9568	-1.45648	5e-05	yes	0.829386	-1.22505	-0.624997	1.45648	yes	yes	no	yes
ENSDARG00000070480	ENSDARG00000070480	agr2	chr19:31646941-31649494	80.3677	43.4902	-0.885923	0.0001	yes	189.864	112.8	-0.751205	5e-05	yes	169.657	101.339	-0.743431	0.00165	yes	83.1432	44.3142	-0.90783	5e-05	yes	0.885923	0.751205	0.743431	0.90783	yes	no	no	yes
ENSDARG00000006546	ENSDARG00000006546	ak4	chr6:31044314-31056721	19.3781	35.304	0.865405	5e-05	yes	12.6459	32.1862	1.34777	5e-05	yes	11.3	24.5268	1.11804	5e-05	yes	23.7201	35.9712	0.600737	0.0025	yes	-0.865405	-1.34777	-1.11804	-0.600737	yes	yes	yes	no
ENSDARG00000045089	ENSDARG00000045089	APCS	chr13:20508373-20510467	4.93021	2.03488	-1.27671	5e-05	yes	2.8549	5.64218	0.982812	0.00665	yes	2.55116	6.21389	1.28435	0.0007	yes	4.15825	2.07593	-1.00222	0.0027	yes	1.27671	-0.982812	-1.28435	1.00222	yes	yes	yes	yes
ENSDARG00000042780	ENSDARG00000042780	APOB (1 of 3)	chr17:30763198-30786868	33.03	60.57	0.874826	0.0004	yes	14.6796	36.8337	1.32722	5e-05	yes	13.1174	41.7301	1.66961	5e-05	yes	27.1556	61.7231	1.18456	5e-05	yes	-0.874826	-1.32722	-1.66961	-1.18456	yes	yes	yes	yes
ENSDARG00000092155	ENSDARG00000092155	apoc2	chr16:26224047-26230454	1437.05	2839.83	0.982691	0.00025	yes	194.957	887.113	2.18596	5e-05	yes	174.209	1814.29	3.38051	5e-05	yes	653.898	2894.38	2.14612	5e-05	yes	-0.982691	-2.18596	-3.38051	-2.14612	yes	yes	yes	yes
ENSDARG00000059388	ENSDARG00000059388	bdh1	chr24:3334884-3420385	26.3375	48.5492	0.882329	0.0003	yes	17.1956	36.2422	1.07563	0.00015	yes	15.3655	33.257	1.11396	0.0002	yes	26.7109	49.4861	0.889596	0.0001	yes	-0.882329	-1.07563	-1.11396	-0.889596	yes	yes	yes	yes
ENSDARG00000040284	ENSDARG00000040284	BX005256.1	chr16:27061038-27068162	13.3644	7.20109	-0.89211	0.00015	yes	37.4951	18.596	-1.0117	5e-05	yes	33.5047	16.8723	-0.989711	5e-05	yes	13.7072	7.34317	-0.900454	0.00025	yes	0.89211	1.0117	0.989711	0.900454	yes	yes	yes	yes
ENSDARG00000091479	ENSDARG00000091479	BX296538.3	chr25:6558109-6558544	47.1559	84.9295	0.848828	0.00025	yes	38.1684	79.8578	1.06505	5e-05	yes	34.1063	59.624	0.805853	0.00195	yes	58.8741	86.5411	0.555754	0.0075	yes	-0.848828	-1.06505	-0.805853	-0.555754	yes	yes	no	no
ENSDARG00000061222	ENSDARG00000061222	BX649282.1	chr6:52900364-52991541	11.8319	6.46888	-0.871094	5e-05	yes	4.42861	2.89619	-0.612697	0.00345	yes	3.95727	14.957	1.91824	5e-05	yes	2.13476	6.5922	1.62669	5e-05	yes	0.871094	0.612697	-1.91824	-1.62669	yes	no	yes	yes
ENSDARG00000016290	ENSDARG00000016290	BX927244.1	chr15:14142650-14152739	85.9462	10.697	-3.00622	5e-05	yes	2.94211	0.881157	-1.73938	5e-05	yes	2.62903	108.685	5.36948	5e-05	yes	0.649646	10.8583	4.063	5e-05	yes	3.00622	1.73938	-5.36948	-4.063	yes	yes	yes	yes
ENSDARG00000087359	ENSDARG00000087359	c3b	chr1:56776444-56813502	23.8894	4.69688	-2.3466	5e-05	yes	5.82806	2.02383	-1.52593	5e-05	yes	5.20799	30.0826	2.53013	5e-05	yes	1.49206	4.78601	1.68152	5e-05	yes	2.3466	1.52593	-2.53013	-1.68152	yes	yes	yes	yes
ENSDARG00000086592	ENSDARG00000086592	CABZ01072040.1	chr21:64249-117768	87.8052	181.861	1.05046	5e-05	yes	32.6162	142.635	2.12867	5e-05	yes	29.1446	110.873	1.9276	5e-05	yes	105.139	185.386	0.818239	0.00015	yes	-1.05046	-2.12867	-1.9276	-0.818239	yes	yes	yes	yes
ENSDARG00000025237	ENSDARG00000025237	CABZ01074899.1	chr8:55150277-55161733	5.31737	1.06894	-2.31453	5e-05	yes	19.2772	5.88968	-1.71064	5e-05	yes	17.2258	6.71398	-1.35933	5e-05	yes	4.33904	1.08894	-1.99446	5e-05	yes	2.31453	1.71064	1.35933	1.99446	yes	yes	yes	yes
ENSDARG00000059061	ENSDARG00000059061	CABZ01111729.1	Zv9_NA715:15625-20854	3.13543	1.53936	-1.02633	0.0001	yes	7.83201	4.2934	-0.867263	0.0002	yes	6.99847	3.96057	-0.821331	0.0012	yes	3.16673	1.56798	-1.01409	5e-05	yes	1.02633	0.867263	0.821331	1.01409	yes	yes	yes	yes
ENSDARG00000052515	ENSDARG00000052515	calcoco2	chr12:21993646-22003904	8.49724	4.44426	-0.935052	0.0001	yes	4.45399	2.17102	-1.03673	0.0007	yes	3.97992	10.7582	1.43463	5e-05	yes	1.60057	4.5269	1.49994	5e-05	yes	0.935052	1.03673	-1.43463	-1.49994	yes	yes	yes	yes
ENSDARG00000051923	ENSDARG00000051923	ccnb1	chr5:55149483-55153246	6.42663	1.421	-2.17716	5e-05	yes	23.9588	5.82566	-2.04006	5e-05	yes	21.4088	8.13386	-1.39619	5e-05	yes	4.29324	1.44478	-1.57122	0.00195	yes	2.17716	2.04006	1.39619	1.57122	yes	yes	yes	yes
ENSDARG00000087554	ENSDARG00000087554	cdk1	chr17:20753843-20759613	5.06775	1.06029	-2.25688	5e-05	yes	17.4048	5.34162	-1.70413	5e-05	yes	15.5523	6.41487	-1.27764	5e-05	yes	3.93683	1.07844	-1.8681	5e-05	yes	2.25688	1.70413	1.27764	1.8681	yes	yes	yes	yes
ENSDARG00000004026	ENSDARG00000004026	chrm5a	chr17:394008-395548	2.07021	4.08543	0.980712	0.00015	yes	0.350667	3.2905	3.23013	5e-05	yes	0.313346	2.61214	3.0594	5e-05	yes	2.42532	4.16661	0.780701	0.003	yes	-0.980712	-3.23013	-3.0594	-0.780701	yes	yes	yes	no
ENSDARG00000028096	ENSDARG00000028096	CLDN23 (1 of 2)	chr10:15075410-15077355	6.40282	3.60953	-0.826897	0.00055	yes	21.7903	7.72614	-1.49586	5e-05	yes	19.4711	8.08348	-1.26828	5e-05	yes	5.69765	3.67321	-0.633327	0.0067	yes	0.826897	1.49586	1.26828	0.633327	yes	yes	yes	no
ENSDARG00000091222	ENSDARG00000091222	CR407588.1	chr17:30654064-30662654	9.28099	16.7135	0.848665	0.0003	yes	4.0881	9.21828	1.17307	5e-05	yes	3.65306	11.6862	1.67763	5e-05	yes	6.79532	17.0428	1.32655	5e-05	yes	-0.848665	-1.17307	-1.67763	-1.32655	yes	yes	yes	yes
ENSDARG00000002396	ENSDARG00000002396	cry-dash	chr24:20802473-20816926	12.4974	25.0074	1.00072	5e-05	yes	9.71973	52.5782	2.43548	5e-05	yes	8.68528	15.7615	0.859757	0.0003	yes	38.7562	25.5094	-0.603395	0.00235	yes	-1.00072	-2.43548	-0.859757	0.603395	yes	yes	yes	no
ENSDARG00000003902	ENSDARG00000003902	ctsl.1	chr17:27315893-27320142	1524.75	3114.45	1.0304	0.00055	yes	711.76	2080.96	1.54779	5e-05	yes	636.005	1927.82	1.59986	5e-05	yes	1534.04	3172.94	1.04848	5e-05	yes	-1.0304	-1.54779	-1.59986	-1.04848	yes	yes	yes	yes
ENSDARG00000068493	ENSDARG00000068493	CU928854.1	chr15:54296-58832	22.0038	56.8494	1.36939	5e-05	yes	9.72331	36.6046	1.9125	5e-05	yes	8.68844	27.7381	1.6747	5e-05	yes	26.9811	57.983	1.10368	5e-05	yes	-1.36939	-1.9125	-1.6747	-1.10368	yes	yes	yes	yes
ENSDARG00000033802	ENSDARG00000033802	cyp27a7	chr9:39461299-39471449	40.6299	107.33	1.40144	5e-05	yes	20.0206	87.9667	2.13547	5e-05	yes	17.8898	51.3084	1.52006	5e-05	yes	64.8402	109.379	0.754377	0.00035	yes	-1.40144	-2.13547	-1.52006	-0.754377	yes	yes	yes	no
ENSDARG00000042953	ENSDARG00000042953	cyp2n13	chr20:25545050-25552386	212.785	390.62	0.876367	0.00025	yes	37.6732	140.917	1.90324	5e-05	yes	33.6636	268.402	2.99514	5e-05	yes	103.878	398.184	1.93855	5e-05	yes	-0.876367	-1.90324	-2.99514	-1.93855	yes	yes	yes	yes
ENSDARG00000040426	ENSDARG00000040426	CYP2W1 (8 of 10)	chr3:12536543-12548998	6.15893	10.9925	0.835762	0.0003	yes	1.39652	5.37705	1.94498	5e-05	yes	1.2479	7.78652	2.64148	5e-05	yes	3.96375	11.2066	1.4994	5e-05	yes	-0.835762	-1.94498	-2.64148	-1.4994	yes	yes	yes	yes
ENSDARG00000062132	ENSDARG00000062132	cyp4v8	chr1:16642200-16654540	89.1447	174.302	0.967372	0.00025	yes	9.51091	58.4942	2.62064	5e-05	yes	8.49865	112.657	3.72856	5e-05	yes	43.1244	177.586	2.04194	5e-05	yes	-0.967372	-2.62064	-3.72856	-2.04194	yes	yes	yes	yes
ENSDARG00000037618	ENSDARG00000037618	ddit4	chr12:49633437-49635557	11.2262	3.922	-1.51721	5e-05	yes	34.4466	15.8696	-1.11809	5e-05	yes	30.7809	14.1757	-1.11862	5e-05	yes	11.6999	3.99478	-1.5503	5e-05	yes	1.51721	1.11809	1.11862	1.5503	yes	yes	yes	yes
ENSDARG00000044751	ENSDARG00000044751	ddt	chr21:13912128-13914833	98.3522	198.964	1.01648	5e-05	yes	85.739	181.241	1.07988	5e-05	yes	76.6139	124.238	0.697429	0.00215	yes	133.577	202.705	0.601713	0.00185	yes	-1.01648	-1.07988	-0.697429	-0.601713	yes	yes	no	no
ENSDARG00000045257	ENSDARG00000045257	decr2	chr24:39212204-39224753	37.435	66.9459	0.838607	0.0005	yes	15.9597	51.9604	1.70298	5e-05	yes	14.2611	47.1814	1.72613	5e-05	yes	38.2983	68.2511	0.833573	0.0001	yes	-0.838607	-1.70298	-1.72613	-0.833573	yes	yes	yes	yes
ENSDARG00000054300	ENSDARG00000054300	dhrs1	chr2:37964505-37972433	145.947	268.255	0.878166	0.0002	yes	81.6115	249.334	1.61124	5e-05	yes	72.9252	184.115	1.33612	5e-05	yes	183.776	273.433	0.573243	0.003	yes	-0.878166	-1.61124	-1.33612	-0.573243	yes	yes	yes	no
ENSDARG00000042112	ENSDARG00000042112	dio1	chr8:18558969-18561489	60.7542	115.418	0.925812	5e-05	yes	25.4747	81.5833	1.67921	5e-05	yes	22.7633	76.6005	1.75064	5e-05	yes	60.1348	117.675	0.968534	5e-05	yes	-0.925812	-1.67921	-1.75064	-0.968534	yes	yes	yes	yes
ENSDARG00000012539	ENSDARG00000012539	dnase1	chr3:27930093-27935576	10.7293	19.946	0.894538	0.00025	yes	1.74803	8.94083	2.35468	5e-05	yes	1.56197	13.5948	3.12161	5e-05	yes	6.59124	20.3119	1.6237	5e-05	yes	-0.894538	-2.35468	-3.12161	-1.6237	yes	yes	yes	yes
ENSDARG00000045414	ENSDARG00000045414	elovl2	chr24:8661506-8688060	58.2724	116.113	0.994638	5e-05	yes	0.942275	6.70142	2.83025	5e-05	yes	0.841986	73.4637	6.44709	5e-05	yes	4.94167	118.341	4.5818	5e-05	yes	-0.994638	-2.83025	-6.44709	-4.5818	yes	yes	yes	yes
ENSDARG00000013750	ENSDARG00000013750	eno1b	chr6:40592566-40600270	3.12892	0.970638	-1.68866	5e-05	yes	12.9098	5.42028	-1.25203	5e-05	yes	11.5359	3.94724	-1.54722	5e-05	yes	3.99589	0.988575	-2.0151	5e-05	yes	1.68866	1.25203	1.54722	2.0151	yes	yes	yes	yes
ENSDARG00000042854	ENSDARG00000042854	ephx1	chr20:36652684-36662787	27.4444	56.6799	1.04632	5e-05	yes	15.7372	49.5858	1.65574	5e-05	yes	14.0623	34.6384	1.30054	5e-05	yes	36.5459	57.7618	0.660406	0.00035	yes	-1.04632	-1.65574	-1.30054	-0.660406	yes	yes	yes	no
ENSDARG00000059227	ENSDARG00000059227	fabp1b.1	chr8:910207-920867	4022.23	7937.14	0.980623	5e-05	yes	759.771	3853.54	2.34255	5e-05	yes	678.899	5074.77	2.90207	5e-05	yes	2840.38	8091.86	1.51039	5e-05	yes	-0.980623	-2.34255	-2.90207	-1.51039	yes	yes	yes	yes
ENSDARG00000006427	ENSDARG00000006427	fabp2	chr1:24705630-24708975	3033.13	6755.63	1.15528	0.0003	yes	293.507	1791.07	2.60935	5e-05	yes	262.267	3825.36	3.86649	5e-05	yes	1320.25	6885.47	2.38274	5e-05	yes	-1.15528	-2.60935	-3.86649	-2.38274	yes	yes	yes	yes
ENSDARG00000019532	ENSDARG00000019532	fads2	chr25:4189904-4205135	116.786	355.497	1.60597	5e-05	yes	1.41692	17.6658	3.64013	5e-05	yes	1.26612	147.624	6.86537	5e-05	yes	13.0255	362.119	4.79705	5e-05	yes	-1.60597	-3.64013	-6.86537	-4.79705	yes	yes	yes	yes
ENSDARG00000021383	ENSDARG00000021383	FOLH1	chr15:42703277-42739302	39.4482	70.4748	0.837148	0.0001	yes	9.16308	35.1963	1.94152	5e-05	yes	8.18783	49.7784	2.60397	5e-05	yes	25.9419	71.8415	1.46953	5e-05	yes	-0.837148	-1.94152	-2.60397	-1.46953	yes	yes	yes	yes
ENSDARG00000015355	ENSDARG00000015355	fosl1a	chr14:31611182-31617315	5.75974	3.21298	-0.84209	0.00045	yes	36.6877	10.5818	-1.79371	5e-05	yes	32.7835	7.27801	-2.17135	5e-05	yes	7.79562	3.27626	-1.25061	5e-05	yes	0.84209	1.79371	2.17135	1.25061	yes	yes	yes	yes
ENSDARG00000038700	ENSDARG00000038700	gpr160	chr2:37015920-37016992	14.783	8.43593	-0.809318	0.00025	yes	10.4544	6.05765	-0.787285	0.0022	yes	9.34182	18.6802	0.999735	5e-05	yes	4.46543	8.59346	0.94444	0.0001	yes	0.809318	0.787285	-0.999735	-0.94444	yes	no	yes	yes
ENSDARG00000062501	ENSDARG00000062501	hhipl1	chr17:17744521-17855844	11.3774	22.855	1.00634	5e-05	yes	5.68301	20.5832	1.85674	5e-05	yes	5.0782	14.3577	1.49943	5e-05	yes	15.1715	23.2909	0.618405	0.0059	yes	-1.00634	-1.85674	-1.49943	-0.618405	yes	yes	yes	no
ENSDARG00000093817	ENSDARG00000093817	hmgn2	chr16:54736926-54740193	143.817	73.6888	-0.964718	5e-05	yes	345.023	159.399	-1.11405	5e-05	yes	308.301	181.644	-0.763225	0.0021	yes	117.491	75.0548	-0.646538	0.00085	yes	0.964718	1.11405	0.763225	0.646538	yes	yes	no	no
ENSDARG00000024746	ENSDARG00000024746	hsp90aa1.2	chr20:54322746-54336769	3.6329	1.83622	-0.98438	0.00105	yes	25.1183	6.87538	-1.86922	5e-05	yes	22.4455	4.59302	-2.28891	5e-05	yes	5.06402	1.86475	-1.4413	5e-05	yes	0.98438	1.86922	2.28891	1.4413	yes	yes	yes	yes
ENSDARG00000056804	ENSDARG00000056804	IL4I1	chr15:20656625-20663487	8.19724	3.75262	-1.12724	5e-05	yes	3.17805	0.213937	-3.89288	5e-05	yes	2.83976	10.3862	1.87083	5e-05	yes	0.157625	3.82772	4.60191	5e-05	yes	1.12724	3.89288	-1.87083	-4.60191	yes	yes	yes	yes
ENSDARG00000077270	ENSDARG00000077270	INCENP	chr25:3555052-3581279	5.42772	1.50829	-1.84743	5e-05	yes	16.2425	4.22183	-1.94384	5e-05	yes	14.5138	6.86939	-1.07917	0.00015	yes	3.1124	1.53482	-1.01996	0.003	yes	1.84743	1.94384	1.07917	1.01996	yes	yes	yes	yes
ENSDARG00000027658	ENSDARG00000027658	irf10	chr23:658216-669549	5.59701	2.81258	-0.992764	0.0001	yes	2.37163	0.501606	-2.24125	5e-05	yes	2.11922	7.0905	1.74235	5e-05	yes	0.369688	2.86644	2.95488	5e-05	yes	0.992764	2.24125	-1.74235	-2.95488	yes	yes	yes	yes
ENSDARG00000032768	ENSDARG00000032768	irf1b	chr21:44267648-44273778	36.2358	17.7079	-1.03302	5e-05	yes	25.7713	7.99319	-1.68892	5e-05	yes	23.0285	45.9419	0.996386	5e-05	yes	5.89279	18.0387	1.61408	5e-05	yes	1.03302	1.68892	-0.996386	-1.61408	yes	yes	yes	yes
ENSDARG00000069390	ENSDARG00000069390	itga2	chr10:8937517-8949436	9.6772	5.31421	-0.864734	0.0006	yes	6.65959	1.28853	-2.36971	5e-05	yes	5.95086	12.2279	1.03901	0.00015	yes	0.949714	5.41376	2.51106	5e-05	yes	0.864734	2.36971	-1.03901	-2.51106	yes	yes	yes	yes
ENSDARG00000013794	ENSDARG00000013794	klf11b	chr17:32571698-32575805	3.95113	8.11486	1.0383	5e-05	yes	12.5935	24.8223	0.978957	5e-05	yes	11.2532	4.98373	-1.17504	5e-05	yes	18.2944	8.27315	-1.1449	5e-05	yes	-1.0383	-0.978957	1.17504	1.1449	yes	yes	yes	yes
ENSDARG00000038066	ENSDARG00000038066	kpna2	chr3:25471233-25478284	8.29701	2.26688	-1.87188	5e-05	yes	31.4496	11.6642	-1.43095	5e-05	yes	28.1024	10.4968	-1.42074	5e-05	yes	8.59538	2.30509	-1.89874	5e-05	yes	1.87188	1.43095	1.42074	1.89874	yes	yes	yes	yes
ENSDARG00000033227	ENSDARG00000033227	lect2l	chr14:38206898-38208441	54.3118	21.622	-1.32877	5e-05	yes	167.454	14.5212	-3.52753	5e-05	yes	149.633	68.5191	-1.12685	5e-05	yes	10.7051	22.0406	1.04187	5e-05	yes	1.32877	3.52753	1.12685	-1.04187	yes	yes	yes	yes
ENSDARG00000004713	ENSDARG00000004713	mad2l1	chr7:58874320-58882730	3.45571	0.981609	-1.81576	5e-05	yes	12.4356	5.38236	-1.20817	0.0001	yes	11.112	4.37243	-1.34562	0.0001	yes	3.96818	0.99918	-1.98966	5e-05	yes	1.81576	1.20817	1.34562	1.98966	yes	yes	yes	yes
ENSDARG00000001897	ENSDARG00000001897	man2b1	chr11:32083214-32101155	50.951	113.489	1.15537	5e-05	yes	32.436	93.5064	1.52747	5e-05	yes	28.9838	64.4182	1.15222	5e-05	yes	68.9242	115.64	0.746562	0.0002	yes	-1.15537	-1.52747	-1.15222	-0.746562	yes	yes	yes	no
ENSDARG00000031952	ENSDARG00000031952	mb	chr1:55677270-55684413	3.28119	0.816522	-2.00665	5e-05	yes	11.5958	3.49547	-1.73004	5e-05	yes	10.3617	4.1369	-1.32463	5e-05	yes	2.57898	0.833271	-1.62994	0.00025	yes	2.00665	1.73004	1.32463	1.62994	yes	yes	yes	yes
ENSDARG00000038682	ENSDARG00000038682	MFAP4 (1 of 14)	chr1:59755053-59756146	65.167	10.6173	-2.61772	5e-05	yes	35.6141	4.65965	-2.93415	5e-05	yes	31.8234	82.3894	1.37237	5e-05	yes	3.43458	10.7873	1.65113	5e-05	yes	2.61772	2.93415	-1.37237	-1.65113	yes	yes	yes	yes
ENSDARG00000089107	ENSDARG00000089107	MLXIPL	chr5:3836561-3902996	7.39269	18.1661	1.29708	5e-05	yes	3.56554	13.5121	1.92206	5e-05	yes	3.18608	9.35288	1.55363	5e-05	yes	9.9585	18.5156	0.894743	0.00075	yes	-1.29708	-1.92206	-1.55363	-0.894743	yes	yes	yes	yes
ENSDARG00000056065	ENSDARG00000056065	mov10b.2	chr8:28483634-28509708	6.91244	3.65435	-0.919581	5e-05	yes	3.3133	0.421264	-2.97547	5e-05	yes	2.96065	8.74863	1.56315	5e-05	yes	0.310558	3.72461	3.58415	5e-05	yes	0.919581	2.97547	-1.56315	-3.58415	yes	yes	yes	yes
ENSDARG00000067848	ENSDARG00000067848	nmrk2	chr2:56106355-56216886	260.867	126.433	-1.04494	5e-05	yes	176.641	79.2892	-1.15562	5e-05	yes	157.842	329.025	1.05972	0.0001	yes	58.4542	128.828	1.14007	5e-05	yes	1.04494	1.15562	-1.05972	-1.14007	yes	yes	yes	yes
ENSDARG00000016536	ENSDARG00000016536	npas2	chr5:24575013-24614052	2.21739	4.81679	1.11921	5e-05	yes	0.772239	4.36955	2.50037	5e-05	yes	0.690059	2.80902	2.02527	5e-05	yes	3.22072	4.91118	0.608688	0.0055	yes	-1.11921	-2.50037	-2.02527	-0.608688	yes	yes	yes	no
ENSDARG00000045929	ENSDARG00000045929	OAZ2 (1 of 2)	chr25:6548194-6555882	32.4216	66.1008	1.02771	5e-05	yes	25.4759	54.9378	1.10867	5e-05	yes	22.7645	40.9918	0.848551	0.0011	yes	40.4931	67.3733	0.734502	0.0004	yes	-1.02771	-1.10867	-0.848551	-0.734502	yes	yes	yes	no
ENSDARG00000087002	ENSDARG00000087002	or109-11	chr10:37393641-37394622	3.29831	7.29229	1.14465	5e-05	yes	1.82621	3.64226	0.995976	0.0057	yes	1.63183	4.1604	1.35024	0.0001	yes	2.68433	7.42116	1.46708	5e-05	yes	-1.14465	-0.995976	-1.35024	-1.46708	yes	yes	yes	yes
ENSDARG00000014333	ENSDARG00000014333	ormdl1	chr9:42039265-42107217	34.1454	59.8371	0.809348	0.00255	yes	12.4526	29.9861	1.26785	5e-05	yes	11.1273	43.0892	1.95323	5e-05	yes	22.1022	61.0005	1.46463	5e-05	yes	-0.809348	-1.26785	-1.95323	-1.46463	yes	yes	yes	yes
ENSDARG00000007221	ENSDARG00000007221	pbk	chr20:39385052-39392715	2.69274	0.527436	-2.352	5e-05	yes	7.71114	3.58233	-1.10605	0.0001	yes	6.89047	3.40567	-1.01666	0.00055	yes	2.64026	0.536746	-2.29837	5e-05	yes	2.352	1.10605	1.01666	2.29837	yes	yes	yes	yes
ENSDARG00000041022	ENSDARG00000041022	pdcd4b	chr22:32348657-32379656	18.2002	33.3674	0.874482	0.0001	yes	9.71057	29.1353	1.58514	5e-05	yes	8.67706	23.0212	1.40769	5e-05	yes	21.4763	33.9916	0.662434	0.0006	yes	-0.874482	-1.58514	-1.40769	-0.662434	yes	yes	yes	no
ENSDARG00000042069	ENSDARG00000042069	pebp1	chr5:17122082-17128948	7.23394	15.273	1.07813	5e-05	yes	1.42663	4.25523	1.57663	5e-05	yes	1.27479	9.13407	2.841	5e-05	yes	3.13679	15.568	2.31123	5e-05	yes	-1.07813	-1.57663	-2.841	-2.31123	yes	yes	yes	yes
ENSDARG00000015662	ENSDARG00000015662	pla2g12b	chr13:4326421-4337831	217.121	382.319	0.816274	0.0009	yes	142.067	365.466	1.36317	5e-05	yes	126.947	273.94	1.10964	5e-05	yes	269.35	389.687	0.532836	0.00735	yes	-0.816274	-1.36317	-1.10964	-0.532836	yes	yes	yes	no
ENSDARG00000068763	ENSDARG00000068763	plcg2	chr18:12725631-12772003	12.3379	6.16334	-1.00131	5e-05	yes	7.60375	3.83998	-0.985614	5e-05	yes	6.79449	15.5867	1.19788	5e-05	yes	2.83022	6.27484	1.14867	5e-05	yes	1.00131	0.985614	-1.19788	-1.14867	yes	yes	yes	yes
ENSDARG00000058471	ENSDARG00000058471	plk1	chr1:8229224-8238721	6.87646	2.52803	-1.44365	0.00045	yes	19.2683	8.51347	-1.17841	0.0011	yes	17.2176	8.71283	-0.982668	0.00775	yes	6.27392	2.57408	-1.28531	0.0035	yes	1.44365	1.17841	0.982668	1.28531	yes	yes	yes	yes
ENSDARG00000033144	ENSDARG00000033144	psme2	chr12:14425175-14443081	29.4813	13.3136	-1.1469	5e-05	yes	15.5194	9.81167	-0.661501	0.012	yes	13.8677	37.233	1.42486	5e-05	yes	7.2326	13.5668	0.90749	0.00065	yes	1.1469	0.661501	-1.42486	-0.90749	yes	no	yes	yes
ENSDARG00000010276	ENSDARG00000010276	ptgs2b	chr20:34147105-34152005	5.60198	2.34816	-1.25441	5e-05	yes	29.1522	5.46892	-2.41428	5e-05	yes	26.0496	7.06525	-1.88245	5e-05	yes	4.03115	2.39318	-0.752261	0.00195	yes	1.25441	2.41428	1.88245	0.752261	yes	yes	yes	no
ENSDARG00000019274	ENSDARG00000019274	rasd1	chr12:1576091-1577697	4.85594	2.71934	-0.836492	0.00105	yes	17.7284	8.57017	-1.04866	5e-05	yes	15.8416	6.14238	-1.36685	5e-05	yes	6.31487	2.76821	-1.1898	5e-05	yes	0.836492	1.04866	1.36685	1.1898	yes	yes	yes	yes
ENSDARG00000093774	ENSDARG00000093774	rbp2b	chr2:38720261-38740800	71.1309	131.714	0.888861	5e-05	yes	35.9935	102.605	1.51129	5e-05	yes	32.163	89.8106	1.48149	5e-05	yes	75.6529	134.234	0.827282	5e-05	yes	-0.888861	-1.51129	-1.48149	-0.827282	yes	yes	yes	yes
ENSDARG00000009018	ENSDARG00000009018	rhbg	chr16:31493983-31505352	23.5094	13.4154	-0.809349	0.0002	yes	89.4851	38.2052	-1.22788	5e-05	yes	79.9603	29.7164	-1.42802	5e-05	yes	28.1837	13.6619	-1.0447	5e-05	yes	0.809349	1.22788	1.42802	1.0447	yes	yes	yes	yes
ENSDARG00000068851	ENSDARG00000068851	rnf183	chr15:34182737-34188950	9.74448	4.00701	-1.28206	5e-05	yes	30.3549	13.3408	-1.18608	5e-05	yes	27.1244	12.3241	-1.13811	5e-05	yes	9.83189	4.08015	-1.26885	5e-05	yes	1.28206	1.18608	1.13811	1.26885	yes	yes	yes	yes
ENSDARG00000052826	ENSDARG00000052826	runx3	chr13:45712362-45775535	6.00876	2.94338	-1.02959	0.0001	yes	4.16729	1.55575	-1.4215	5e-05	yes	3.72377	7.59065	1.02746	0.00025	yes	1.14682	2.99746	1.38611	5e-05	yes	1.02959	1.4215	-1.02746	-1.38611	yes	yes	yes	yes
ENSDARG00000035652	ENSDARG00000035652	sat1a	chr5:4339515-4350162	542.901	957.701	0.818884	0.00065	yes	215.713	614.194	1.50958	5e-05	yes	192.754	686.085	1.83163	5e-05	yes	452.637	975.976	1.10849	5e-05	yes	-0.818884	-1.50958	-1.83163	-1.10849	yes	yes	yes	yes
ENSDARG00000052046	ENSDARG00000052046	SEC16B	chr6:20034681-20082606	14.0174	26.9858	0.944984	0.00295	yes	2.13417	9.44644	2.14609	0.0002	yes	1.90704	17.6939	3.21385	5e-05	yes	6.96287	27.5116	1.98229	5e-05	yes	-0.944984	-2.14609	-3.21385	-1.98229	yes	yes	yes	yes
ENSDARG00000052772	ENSDARG00000052772	si:ch1073-13h15.3	chr12:3804709-3893083	293.686	584.069	0.991865	0.00025	yes	121.112	377.983	1.64198	5e-05	yes	108.221	370.764	1.77651	5e-05	yes	278.641	595.191	1.09495	5e-05	yes	-0.991865	-1.64198	-1.77651	-1.09495	yes	yes	yes	yes
ENSDARG00000079553	ENSDARG00000079553	si:ch211-149p10.2	chr16:41059538-41062527	26.1961	12.5639	-1.06007	5e-05	yes	12.444	3.99099	-1.64063	5e-05	yes	11.1195	33.2546	1.58046	5e-05	yes	2.94093	12.7873	2.12036	5e-05	yes	1.06007	1.64063	-1.58046	-2.12036	yes	yes	yes	yes
ENSDARG00000076825	ENSDARG00000076825	si:ch211-207e19.11	chr4:57084207-57096428	6.56614	12.5014	0.928969	0.0005	yes	1.55179	4.13421	1.41368	0.00205	yes	1.38663	8.29117	2.57999	5e-05	yes	3.04625	12.7241	2.06246	5e-05	yes	-0.928969	-1.41368	-2.57999	-2.06246	yes	yes	yes	yes
ENSDARG00000002405	ENSDARG00000002405	si:ch211-225b11.1	chr5:22570099-22597916	4.10319	7.23906	0.819055	0.00015	yes	12.0537	21.4168	0.829266	5e-05	yes	10.7709	5.18404	-1.05499	5e-05	yes	15.7837	7.38118	-1.09651	5e-05	yes	-0.819055	-0.829266	1.05499	1.09651	yes	yes	yes	yes
ENSDARG00000068966	ENSDARG00000068966	si:ch211-261n11.7	chr8:23093540-23097570	9.45318	19.0028	1.00734	5e-05	yes	1.39128	3.83331	1.46217	5e-05	yes	1.24322	11.9479	3.2646	5e-05	yes	2.82558	19.3691	2.77714	5e-05	yes	-1.00734	-1.46217	-3.2646	-2.77714	yes	yes	yes	yes
ENSDARG00000011636	ENSDARG00000011636	si:ch211-93f2.1	chr25:31352632-31419476	201.705	370.62	0.877694	0.0014	yes	82.107	347.682	2.08219	5e-05	yes	73.3678	254.63	1.79518	5e-05	yes	256.265	377.805	0.560005	0.00745	yes	-0.877694	-2.08219	-1.79518	-0.560005	yes	yes	yes	no
ENSDARG00000045834	ENSDARG00000045834	si:dkey-14d8.7	chr4:5410349-5413091	288.532	511.813	0.826884	0.0007	yes	40.4969	212.1	2.38886	5e-05	yes	36.1867	365.511	3.33638	5e-05	yes	156.391	520.936	1.73595	5e-05	yes	-0.826884	-2.38886	-3.33638	-1.73595	yes	yes	yes	yes
ENSDARG00000039351	ENSDARG00000039351	si:dkey-200l5.2	chr10:17807200-17810322	126.889	25.4719	-2.31658	5e-05	yes	59.5983	22.0598	-1.43385	5e-05	yes	53.2545	160.788	1.59418	5e-05	yes	16.2606	25.9462	0.674142	0.00405	yes	2.31658	1.43385	-1.59418	-0.674142	yes	yes	yes	no
ENSDARG00000092191	ENSDARG00000092191	si:dkey-238c7.13	chr18:7047760-7050665	803.998	425.616	-0.917641	5e-05	yes	95.8618	19.6363	-2.28743	5e-05	yes	85.6596	1016.88	3.56939	5e-05	yes	14.475	433.583	4.90467	5e-05	yes	0.917641	2.28743	-3.56939	-4.90467	yes	yes	yes	yes
ENSDARG00000093857	ENSDARG00000093857	si:dkey-79f11.10	chr1:6983832-6989556	39.1937	19.0007	-1.04457	0.0003	yes	5.53898	1.03849	-2.41514	5e-05	yes	4.94944	49.7669	3.32985	5e-05	yes	0.765174	19.3502	4.66042	5e-05	yes	1.04457	2.41514	-3.32985	-4.66042	yes	yes	yes	yes
ENSDARG00000095673	ENSDARG00000095673	si:dkey-79f11.8	chr1:6963509-6967670	13.8281	4.09512	-1.75563	5e-05	yes	3.72641	0.522575	-2.83408	0.0002	yes	3.32985	17.5545	2.39831	5e-05	yes	0.385408	4.17002	3.4356	5e-05	yes	1.75563	2.83408	-2.39831	-3.4356	yes	yes	yes	yes
ENSDARG00000092404	ENSDARG00000092404	si:dkey-79p17.2	chr9:47589456-47599521	41.9888	105.831	1.33368	5e-05	yes	2.21982	18.6076	3.06738	5e-05	yes	1.98358	52.8619	4.73605	5e-05	yes	13.7203	107.912	2.97547	5e-05	yes	-1.33368	-3.06738	-4.73605	-2.97547	yes	yes	yes	yes
ENSDARG00000093936	ENSDARG00000093936	si:dkeyp-1h4.6	chr18:7054755-7056956	11.9228	6.54332	-0.865634	0.00025	yes	7.47111	3.83896	-0.960609	0.00035	yes	6.676	15.0837	1.17594	5e-05	yes	2.82964	6.66013	1.23493	5e-05	yes	0.865634	0.960609	-1.17594	-1.23493	yes	yes	yes	yes
ENSDARG00000046053	ENSDARG00000046053	slc27a6	chr10:16452474-16491111	1.84604	4.75836	1.36603	5e-05	yes	5.3692	16.6558	1.63325	5e-05	yes	4.79777	2.33505	-1.03891	0.00015	yes	12.2759	4.84827	-1.34028	5e-05	yes	-1.36603	-1.63325	1.03891	1.34028	yes	yes	yes	yes
ENSDARG00000036864	ENSDARG00000036864	slc34a2b	chr23:1084885-1115886	32.8208	92.6677	1.49746	5e-05	yes	16.2382	71.5659	2.13988	5e-05	yes	14.5099	41.4965	1.51595	5e-05	yes	52.7429	94.5237	0.8417	5e-05	yes	-1.49746	-2.13988	-1.51595	-0.8417	yes	yes	yes	yes
ENSDARG00000038882	ENSDARG00000038882	smc4	chr15:1529849-1568335	2.63661	0.799174	-1.7221	5e-05	yes	6.58829	2.93667	-1.16572	0.0003	yes	5.8871	3.33343	-0.820551	0.0123	yes	2.16461	0.814235	-1.41059	0.00025	yes	1.7221	1.16572	0.820551	1.41059	yes	yes	yes	yes
ENSDARG00000040523	ENSDARG00000040523	smpd2	chr23:5627578-5649685	14.7792	26.5692	0.846191	0.00025	yes	3.421	8.68904	1.34478	5e-05	yes	3.05691	18.6117	2.60606	5e-05	yes	6.40379	27.0871	2.08061	5e-05	yes	-0.846191	-1.34478	-2.60606	-2.08061	yes	yes	yes	yes
ENSDARG00000075015	ENSDARG00000075015	soul5	chr3:54113933-54123253	125.302	241.772	0.948238	0.0001	yes	105.436	559.308	2.40727	5e-05	yes	94.2156	158.739	0.752615	0.00365	yes	412.36	246.291	-0.743539	5e-05	yes	-0.948238	-2.40727	-0.752615	0.743539	yes	yes	no	no
ENSDARG00000079946	ENSDARG00000079946	SQLE	chr16:46192806-46205093	8.40668	16.1838	0.944942	5e-05	yes	3.09632	12.7828	2.04557	5e-05	yes	2.76677	10.5769	1.93465	5e-05	yes	9.42405	16.5035	0.808351	0.00015	yes	-0.944942	-2.04557	-1.93465	-0.808351	yes	yes	yes	yes
ENSDARG00000014165	ENSDARG00000014165	ssr3	chr18:32802231-32809465	1.56285	2.94623	0.914689	0.0033	yes	15.5756	25.3302	0.70157	0.0017	yes	13.918	1.97515	-2.81692	5e-05	yes	18.6801	3.0009	-2.63804	5e-05	yes	-0.914689	-0.70157	2.81692	2.63804	yes	no	yes	yes
ENSDARG00000079766	ENSDARG00000079766	tap1	chr16:52012758-52039349	5.3257	2.98197	-0.836707	0.0004	yes	3.64914	1.70293	-1.09953	0.0001	yes	3.26076	6.73983	1.0475	5e-05	yes	1.25511	3.03855	1.27557	5e-05	yes	0.836707	1.09953	-1.0475	-1.27557	yes	yes	yes	yes
ENSDARG00000074776	ENSDARG00000074776	tmem154	chr1:24011475-24034486	5.99835	2.60111	-1.20544	0.0001	yes	36.9092	12.1479	-1.60327	5e-05	yes	32.9811	7.56687	-2.12387	5e-05	yes	8.95152	2.6473	-1.75761	5e-05	yes	1.20544	1.60327	2.12387	1.75761	yes	yes	yes	yes
ENSDARG00000074390	ENSDARG00000074390	tmem176l.4	chr16:49734596-49747407	35.8627	13.3589	-1.42468	5e-05	yes	95.5537	29.6133	-1.69007	5e-05	yes	85.3833	45.2706	-0.91538	0.0001	yes	21.8349	13.5992	-0.683113	0.00155	yes	1.42468	1.69007	0.91538	0.683113	yes	yes	yes	no
ENSDARG00000079393	ENSDARG00000079393	tmprss15	chr21:33957893-34006233	29.8676	16.2493	-0.878208	0.0002	yes	25.0326	36.0251	0.52519	0.0061	yes	22.3685	37.6256	0.750246	0.0028	yes	26.5577	16.5592	-0.6815	0.0003	yes	0.878208	-0.52519	-0.750246	0.6815	yes	no	no	no
ENSDARG00000027584	ENSDARG00000027584	ttpa	chr2:26795641-26801318	7.63396	13.6711	0.84063	0.0005	yes	18.3009	74.6726	2.02867	5e-05	yes	16.3532	9.64049	-0.762396	0.00225	yes	55.0313	13.9307	-1.98198	5e-05	yes	-0.84063	-2.02867	0.762396	1.98198	yes	yes	no	yes
ENSDARG00000044125	ENSDARG00000044125	txn	chr7:25524321-25531917	96.6064	39.5724	-1.28762	5e-05	yes	362.114	173.501	-1.0615	5e-05	yes	323.576	121.925	-1.40811	5e-05	yes	127.857	40.3151	-1.66514	5e-05	yes	1.28762	1.0615	1.40811	1.66514	yes	yes	yes	yes
ENSDARG00000077169	ENSDARG00000077169	wu:fj08f03	chr14:11649672-11655264	18.6155	3.36602	-2.46739	5e-05	yes	48.6594	9.5136	-2.35466	5e-05	yes	43.4811	23.5346	-0.885608	5e-05	yes	7.01079	3.43464	-1.02942	5e-05	yes	2.46739	2.35466	0.885608	1.02942	yes	yes	yes	yes
ENSDARG00000055510	ENSDARG00000055510	ypel3	chr3:26843146-26848954	12.2653	24.7089	1.01045	5e-05	yes	4.16877	21.7132	2.38088	5e-05	yes	3.72507	15.5431	2.06093	5e-05	yes	16.0061	25.2016	0.654897	0.00125	yes	-1.01045	-2.38088	-2.06093	-0.654897	yes	yes	yes	no
ENSDARG00000056798	ENSDARG00000056798	zgc:123297	chr3:19382575-19393352	16.4865	7.2632	-1.18261	5e-05	yes	4.04769	2.09687	-0.94886	0.00175	yes	3.61695	20.8566	2.52766	5e-05	yes	1.54572	7.39742	2.25874	5e-05	yes	1.18261	0.94886	-2.52766	-2.25874	yes	yes	yes	yes
ENSDARG00000030893	ENSDARG00000030893	zgc:154142	chr1:51303753-51347482	89.8826	165.611	0.881689	0.0007	yes	11.6616	42.4482	1.86394	5e-05	yes	10.4205	113.238	3.44187	5e-05	yes	31.2972	168.904	2.4321	5e-05	yes	-0.881689	-1.86394	-3.44187	-2.4321	yes	yes	yes	yes
ENSDARG00000070416	ENSDARG00000070416	zgc:162816	chr11:32434555-32447616	8.6775	15.4237	0.829802	5e-05	yes	3.53373	9.37469	1.40758	5e-05	yes	3.15762	10.9659	1.79611	5e-05	yes	6.91018	15.7189	1.18571	5e-05	yes	-0.829802	-1.40758	-1.79611	-1.18571	yes	yes	yes	yes
ENSDARG00000063667	ENSDARG00000063667	zgc:162913	chr17:344787-357804	14.2681	25.5487	0.840455	0.0002	yes	6.33176	15.2069	1.26405	5e-05	yes	5.65785	18.033	1.67231	5e-05	yes	11.2076	26.0349	1.21597	5e-05	yes	-0.840455	-1.26405	-1.67231	-1.21597	yes	yes	yes	yes
ENSDARG00000039832	ENSDARG00000039832	zgc:173961	chr13:701310-704057	4.69014	10.7259	1.1934	5e-05	yes	10.7138	32.3956	1.59633	5e-05	yes	9.57359	5.91638	-0.694347	0.0096	yes	23.8777	10.9458	-1.12528	5e-05	yes	-1.1934	-1.59633	0.694347	1.12528	yes	yes	no	yes
ENSDARG00000020866	ENSDARG00000020866	zgc:194131	chr16:26186488-26187831	2028.84	4201.74	1.05033	0.0008	yes	406.239	1345.14	1.72736	5e-05	yes	363.008	2559.84	2.81798	5e-05	yes	991.569	4282.92	2.11081	5e-05	yes	-1.05033	-1.72736	-2.81798	-2.11081	yes	yes	yes	yes
ENSDARG00000025757	ENSDARG00000025757	zgc:64085	chr3:14215991-14243092	13.3682	6.02231	-1.15042	5e-05	yes	36.3224	14.9654	-1.27923	5e-05	yes	32.4567	16.8801	-0.943188	5e-05	yes	11.0307	6.13531	-0.846321	5e-05	yes	1.15042	1.27923	0.943188	0.846321	yes	yes	yes	yes
ENSDARG00000009040	ENSDARG00000009040	zgc:73324	chr3:17752917-17759735	127.778	60.5079	-1.07844	5e-05	yes	91.3241	150.165	0.717485	0.0002	yes	81.6049	161.277	0.982813	5e-05	yes	110.685	61.6874	-0.84341	5e-05	yes	1.07844	-0.717485	-0.982813	0.84341	yes	no	yes	yes
ENSDARG00000040282	ENSDARG00000040282	zgc:92590	chr16:27366215-27369356	164.164	360.321	1.13415	5e-05	yes	23.6963	179.995	2.92522	5e-05	yes	21.1744	207.336	3.29157	5e-05	yes	132.696	367.189	1.4684	5e-05	yes	-1.13415	-2.92522	-3.29157	-1.4684	yes	yes	yes	yes
ENSDARG00000043037	ENSDARG00000043037	abcg2a	chr23:46067265-46120541	326.219	626.743	0.942034	0.0004	yes	153.61	694.417	2.17653	5e-05	yes	137.262	412.964	1.58908	5e-05	yes	511.797	638.373	0.318827	0.11985	no	-0.942034	-2.17653	-1.58908	-0.318827	yes	yes	yes	no
ENSDARG00000009336	ENSDARG00000009336	aif1l	chr5:36167262-36193400	8.05538	3.81666	-1.07764	0.00015	yes	18.5841	6.27597	-1.56616	5e-05	yes	16.6063	10.1743	-0.706807	0.0098	yes	4.62551	3.88715	-0.2509	0.37155	no	1.07764	1.56616	0.706807	0.2509	yes	yes	no	no
ENSDARG00000078805	ENSDARG00000078805	AP5B1	chr11:40346237-40352315	3.85836	8.34158	1.11233	5e-05	yes	3.12702	12.3514	1.98181	5e-05	yes	2.79423	4.86686	0.800542	0.0024	yes	9.10458	8.50956	-0.097509	0.63975	no	-1.11233	-1.98181	-0.800542	0.097509	yes	yes	no	no
ENSDARG00000092170	ENSDARG00000092170	apoc1l	chr16:26211418-26213014	958.273	2016.9	1.07363	5e-05	yes	798.754	1951.32	1.28863	5e-05	yes	713.755	1210.51	0.762117	0.00695	yes	1438.51	2054.69	0.514345	0.01155	no	-1.07363	-1.28863	-0.762117	-0.514345	yes	yes	no	no
ENSDARG00000078178	ENSDARG00000078178	art4	chr3:4218764-4219978	10.8344	3.62705	-1.57875	5e-05	yes	8.33383	3.81927	-1.12568	5e-05	yes	7.44692	13.6887	0.878272	0.00095	yes	2.81547	3.69556	0.392418	0.1518	no	1.57875	1.12568	-0.878272	-0.392418	yes	yes	yes	no
ENSDARG00000037640	ENSDARG00000037640	aurkb	chr14:2646-7578	2.82227	0.840679	-1.74723	5e-05	yes	8.56552	2.75196	-1.63808	5e-05	yes	7.65386	3.57333	-1.09892	0.0001	yes	2.02788	0.855409	-1.24529	1	no	1.74723	1.63808	1.09892	1.24529	yes	yes	yes	no
ENSDARG00000061520	ENSDARG00000061520	b4galnt1a	chr23:28334974-28379631	3.4608	1.87543	-0.883885	0.00245	yes	8.14122	4.41282	-0.883545	0.0018	yes	7.27483	4.37341	-0.734155	0.0114	yes	3.25234	1.90888	-0.768751	0.01165	no	0.883885	0.883545	0.734155	0.768751	yes	yes	no	no
ENSDARG00000087873	ENSDARG00000087873	BX927362.1	chr6:43369375-43380209	3.12271	15.038	2.26774	5e-05	yes	1.58687	26.3572	4.05394	5e-05	yes	1.41802	3.93261	1.47161	5e-05	yes	19.43	15.3436	-0.340644	0.0941	no	-2.26774	-4.05394	-1.47161	0.340644	yes	yes	yes	no
ENSDARG00000090730	ENSDARG00000090730	C2 (1 of 4)	chr21:26843249-26855600	3.4277	0.960363	-1.83559	5e-05	yes	12.9074	0.699874	-4.20496	5e-05	yes	11.5338	4.32623	-1.41469	5e-05	yes	0.516004	0.978645	0.923404	1	no	1.83559	4.20496	1.41469	-0.923404	yes	yes	yes	no
ENSDARG00000086869	ENSDARG00000086869	CABZ01040055.1	chr2:51633349-51641977	73.2736	19.7126	-1.89418	5e-05	yes	471.851	20.7262	-4.50881	5e-05	yes	421.63	92.4518	-2.18921	5e-05	yes	15.2791	20.0914	0.395019	0.09405	no	1.89418	4.50881	2.18921	-0.395019	yes	yes	yes	no
ENSDARG00000079066	ENSDARG00000079066	CABZ01064941.1	chr17:288686-297735	4.73067	2.04963	-1.20668	5e-05	yes	17.2233	3.12001	-2.46473	5e-05	yes	15.3902	5.96387	-1.36769	5e-05	yes	2.29867	2.08764	-0.138927	1	no	1.20668	2.46473	1.36769	0.138927	yes	yes	yes	no
ENSDARG00000089577	ENSDARG00000089577	CABZ01079804.2	Zv9_NA331:97600-107633	3.40209	1.15302	-1.56101	5e-05	yes	8.38865	3.48039	-1.26919	5e-05	yes	7.49588	4.29674	-0.802855	0.0056	yes	2.56695	1.1749	-1.12752	1	no	1.56101	1.26919	0.802855	1.12752	yes	yes	no	no
ENSDARG00000011065	ENSDARG00000011065	camk2b1	chr5:22717253-22814264	16.5255	29.4481	0.833478	0.0002	yes	12.1331	33.5824	1.46876	5e-05	yes	10.8417	20.8588	0.944058	0.00025	yes	24.7505	30.0219	0.278558	0.1841	no	-0.833478	-1.46876	-0.944058	-0.278558	yes	yes	yes	no
ENSDARG00000067672	ENSDARG00000067672	card9	chr5:52843282-52852182	3.06856	0.618698	-2.31026	5e-05	yes	8.65537	0.598834	-3.85337	5e-05	yes	7.73422	3.87298	-0.997811	0.00015	yes	0.441419	0.630354	0.514014	1	no	2.31026	3.85337	0.997811	-0.514014	yes	yes	yes	no
ENSDARG00000052039	ENSDARG00000052039	caspb	chr1:58737274-58751108	4.35628	2.18317	-0.996674	0.0001	yes	9.71397	3.75017	-1.3731	5e-05	yes	8.68003	5.49796	-0.658802	0.0097	yes	2.76558	2.22377	-0.314577	0.2235	no	0.996674	1.3731	0.658802	0.314577	yes	yes	no	no
ENSDARG00000055186	ENSDARG00000055186	ccr9a	chr2:32514747-32516958	3.56296	2.01291	-0.823791	0.00105	yes	2.76819	1.61899	-0.773845	0.0096	yes	2.47358	4.50071	0.863549	0.00165	yes	1.1933	2.05006	0.780703	1	no	0.823791	0.773845	-0.863549	-0.780703	yes	no	yes	no
ENSDARG00000020192	ENSDARG00000020192	cdc20	chr2:19218015-19234798	2.94198	0.817887	-1.84681	0.00015	yes	9.75667	2.77861	-1.81203	5e-05	yes	8.71828	3.71902	-1.22912	0.00095	yes	2.04793	0.831601	-1.3002	1	no	1.84681	1.81203	1.22912	1.3002	yes	yes	yes	no
ENSDARG00000074322	ENSDARG00000074322	CR384059.1	chr25:12748797-12761654	14.4616	3.39455	-2.09094	5e-05	yes	66.6431	4.35142	-3.9369	5e-05	yes	59.5508	18.2507	-1.70617	5e-05	yes	3.20798	3.45904	0.108702	0.67845	no	2.09094	3.9369	1.70617	-0.108702	yes	yes	yes	no
ENSDARG00000086947	ENSDARG00000086947	CR384059.2	chr25:12762186-12767427	14.645	4.03223	-1.86076	5e-05	yes	51.863	4.64991	-3.47943	5e-05	yes	46.3436	18.4842	-1.32607	5e-05	yes	3.42775	4.10836	0.261298	0.2872	no	1.86076	3.47943	1.32607	-0.261298	yes	yes	yes	no
ENSDARG00000074487	ENSDARG00000074487	CR762483.1	chr13:30888420-30924062	2.21338	0.478648	-2.20921	5e-05	yes	6.67935	0.960175	-2.79834	5e-05	yes	5.96852	2.79876	-1.09259	5e-05	yes	0.707588	0.48788	-0.536383	1	no	2.20921	2.79834	1.09259	0.536383	yes	yes	yes	no
ENSDARG00000071457	ENSDARG00000071457	crp6	chr24:39633617-39634395	11.6099	2.81844	-2.04238	5e-05	yes	3.2654	1.11913	-1.54488	0.0006	yes	2.91789	14.6473	2.32764	5e-05	yes	0.825215	2.87392	1.80018	1	no	2.04238	1.54488	-2.32764	-1.80018	yes	yes	yes	no
ENSDARG00000019498	ENSDARG00000019498	cry5	chr10:40632409-40647770	13.068	30.2121	1.20908	5e-05	yes	3.94549	45.7644	3.53595	5e-05	yes	3.52561	16.474	2.22425	5e-05	yes	33.7343	30.8185	-0.130423	0.4959	no	-1.20908	-3.53595	-2.22425	0.130423	yes	yes	yes	no
ENSDARG00000091234	ENSDARG00000091234	CU019646.2	chr7:21397518-21398924	12.5684	4.60631	-1.44811	5e-05	yes	50.2697	8.67566	-2.53464	5e-05	yes	44.92	15.8529	-1.50261	5e-05	yes	6.39319	4.69547	-0.445266	0.0717	no	1.44811	2.53464	1.50261	0.445266	yes	yes	yes	no
ENSDARG00000058351	ENSDARG00000058351	CU104697.1	chr16:11384406-11396876	3.99893	1.51313	-1.40208	5e-05	yes	2.76104	1.06318	-1.37682	0.0003	yes	2.46717	5.06111	1.03659	0.0005	yes	0.783781	1.54109	0.975431	1	no	1.40208	1.37682	-1.03659	-0.975431	yes	yes	yes	no
ENSDARG00000095666	ENSDARG00000095666	CU459094.4	chr11:43822760-43831260	6.13314	1.5928	-1.94506	5e-05	yes	2.38776	0.1793	-3.73521	0.0002	yes	2.13363	7.74652	1.86024	0.0006	yes	0.132155	1.62147	3.617	1	no	1.94506	3.73521	-1.86024	-3.617	yes	yes	yes	no
ENSDARG00000088612	ENSDARG00000088612	CU468142.1	chr14:11708990-11727821	3.18416	1.22538	-1.37768	5e-05	yes	10.7585	2.16791	-2.3111	5e-05	yes	9.61352	4.02249	-1.25697	5e-05	yes	1.59833	1.2489	-0.355907	1	no	1.37768	2.3111	1.25697	0.355907	yes	yes	yes	no
ENSDARG00000076789	ENSDARG00000076789	cx32.2	chr20:40755674-40761095	3.68992	1.48275	-1.31531	5e-05	yes	9.59859	1.32114	-2.86104	5e-05	yes	8.57729	4.66099	-0.879886	0.00185	yes	0.97393	1.5092	0.631893	1	no	1.31531	2.86104	0.879886	-0.631893	yes	yes	yes	no
ENSDARG00000075045	ENSDARG00000075045	cxcl-c1c	chr1:49728562-49732289	6.86458	2.07806	-1.72393	5e-05	yes	37.3572	1.72989	-4.43264	5e-05	yes	33.3818	8.66557	-1.9457	5e-05	yes	1.27524	2.11674	0.731074	1	no	1.72393	4.43264	1.9457	-0.731074	yes	yes	yes	no
ENSDARG00000091156	ENSDARG00000091156	cyp2aa12	chr23:43010132-43024136	46.7544	87.1771	0.898847	0.00015	yes	34.6536	102.129	1.55931	5e-05	yes	30.9653	59.0217	0.930593	0.0002	yes	75.2761	88.8758	0.2396	0.20835	no	-0.898847	-1.55931	-0.930593	-0.2396	yes	yes	yes	no
ENSDARG00000038366	ENSDARG00000038366	cyp2k18	chr3:12551665-12556748	12.8692	54.1482	2.073	5e-05	yes	8.48631	52.8392	2.6384	5e-05	yes	7.58311	16.2762	1.10191	5e-05	yes	38.9454	55.195	0.503082	0.0101	no	-2.073	-2.6384	-1.10191	-0.503082	yes	yes	yes	no
ENSDARG00000007173	ENSDARG00000007173	cyp2y3	chr15:65143-71354	170.96	355.297	1.05536	5e-05	yes	100.239	403.122	2.00777	5e-05	yes	89.5702	215.802	1.26862	5e-05	yes	297.12	362.151	0.285548	0.15	no	-1.05536	-2.00777	-1.26862	-0.285548	yes	yes	yes	no
ENSDARG00000041140	ENSDARG00000041140	ddb2	chr18:20248867-20260045	19.4079	38.4527	0.98644	5e-05	yes	10.9619	55.5673	2.34174	5e-05	yes	9.7952	24.5217	1.32391	5e-05	yes	40.9567	39.1884	-0.0636732	0.73535	no	-0.98644	-2.34174	-1.32391	0.0636732	yes	yes	yes	no
ENSDARG00000011770	ENSDARG00000011770	dhrs12	chr9:24841890-24845981	28.9072	58.7531	1.02323	5e-05	yes	24.3672	95.8157	1.97532	5e-05	yes	21.7739	36.4844	0.744682	0.00265	yes	70.6243	59.8854	-0.237962	0.2313	no	-1.02323	-1.97532	-0.744682	0.237962	yes	yes	no	no
ENSDARG00000034650	ENSDARG00000034650	fabp7b	chr20:40400987-40402467	4.82002	0.772225	-2.64195	5e-05	yes	3.28289	0.492893	-2.73562	5e-05	yes	2.9335	6.09068	1.05398	0.00185	yes	0.363443	0.785774	1.11239	1	no	2.64195	2.73562	-1.05398	-1.11239	yes	yes	yes	no
ENSDARG00000043850	ENSDARG00000043850	ftr54	chr10:26454426-26457624	5.02877	1.74543	-1.52662	5e-05	yes	3.04952	0.860584	-1.82519	5e-05	yes	2.72499	6.36243	1.22332	5e-05	yes	0.634143	1.77726	1.48677	1	no	1.52662	1.82519	-1.22332	-1.48677	yes	yes	yes	no
ENSDARG00000038669	ENSDARG00000038669	gbp2	chr2:42106334-42118400	3.70895	1.45341	-1.35157	5e-05	yes	3.10669	1.2408	-1.32411	5e-05	yes	2.77609	4.70518	0.761197	0.00785	yes	0.914521	1.48047	0.694964	1	no	1.35157	1.32411	-0.761197	-0.694964	yes	yes	no	no
ENSDARG00000035178	ENSDARG00000035178	gna14	chr5:56920831-56938275	2.59516	1.29594	-1.00183	0.00035	yes	8.70944	2.74521	-1.66566	5e-05	yes	7.7825	3.27761	-1.24759	5e-05	yes	2.02387	1.31914	-0.617512	1	no	1.00183	1.66566	1.24759	0.617512	yes	yes	yes	no
ENSDARG00000087390	ENSDARG00000087390	hbbe1.1	chr3:55982960-55983723	83.3644	13.9708	-2.57702	5e-05	yes	56.5815	24.8925	-1.18462	5e-05	yes	50.5599	104.901	1.05296	0.0002	yes	18.3561	14.2331	-0.367013	0.1225	no	2.57702	1.18462	-1.05296	0.367013	yes	yes	yes	no
ENSDARG00000042630	ENSDARG00000042630	hebp2	chr20:30919278-30926942	21.5407	48.1789	1.16134	5e-05	yes	15.2289	82.2867	2.43385	5e-05	yes	13.6082	27.2021	0.99924	5e-05	yes	60.6473	49.1113	-0.304391	0.1122	no	-1.16134	-2.43385	-0.99924	0.304391	yes	yes	yes	no
ENSDARG00000005419	ENSDARG00000005419	il1b	chr10:46393913-46401024	4.83045	0.23503	-4.36124	5e-05	yes	40.6267	0.828146	-5.6164	5e-05	yes	36.3035	6.09215	-2.57509	5e-05	yes	0.610608	0.239547	-1.34994	1	no	4.36124	5.6164	2.57509	1.34994	yes	yes	yes	no
ENSDARG00000069844	ENSDARG00000069844	irg1	chr9:22866972-22871390	4.45538	0.474081	-3.23234	5e-05	yes	16.5436	0.64356	-4.68406	5e-05	yes	14.7829	5.62636	-1.39366	5e-05	yes	0.474295	0.482905	0.0259543	1	no	3.23234	4.68406	1.39366	-0.0259543	yes	yes	yes	no
ENSDARG00000093796	ENSDARG00000093796	itln2	chr7:34472367-34477285	148.614	0.500208	-8.21483	5e-05	yes	6.12491	1.11194	-2.46161	5e-05	yes	5.47307	187.056	5.09498	5e-05	yes	0.820418	0.510033	-0.685768	1	no	8.21483	2.46161	-5.09498	0.685768	yes	yes	yes	no
ENSDARG00000003523	ENSDARG00000003523	itln3	chr14:14032973-14041248	8.19237	4.12547	-0.989721	0.00015	yes	42.7952	5.22112	-3.03502	5e-05	yes	38.2405	10.3188	-1.88982	5e-05	yes	3.85148	4.21007	0.128433	0.63935	no	0.989721	3.03502	1.88982	-0.128433	yes	yes	yes	no
ENSDARG00000042853	ENSDARG00000042853	ivd	chr17:31405669-31420066	63.087	121.022	0.939848	5e-05	yes	55.1948	115.939	1.07077	5e-05	yes	49.3204	79.7474	0.693254	0.00655	yes	85.4551	123.294	0.528858	0.01135	no	-0.939848	-1.07077	-0.693254	-0.528858	yes	yes	no	no
ENSDARG00000010948	ENSDARG00000010948	kif11	chr17:19311201-19327159	2.78325	0.729529	-1.93173	5e-05	yes	8.79472	2.73756	-1.68375	5e-05	yes	7.85869	3.52149	-1.1581	0.0011	yes	2.01764	0.742382	-1.44243	1	no	1.93173	1.68375	1.1581	1.44243	yes	yes	yes	no
ENSDARG00000076914	ENSDARG00000076914	lacc1	chr9:19191015-19202601	3.10711	1.4516	-1.09793	0.0002	yes	8.64541	2.28988	-1.91666	5e-05	yes	7.72535	3.92669	-0.976289	0.00065	yes	1.68769	1.47736	-0.192036	1	no	1.09793	1.91666	0.976289	0.192036	yes	yes	yes	no
ENSDARG00000074020	ENSDARG00000074020	lima1	chr23:36504781-36533886	6.04096	1.77393	-1.76783	5e-05	yes	15.9352	3.82462	-2.05883	5e-05	yes	14.2393	7.62482	-0.901099	0.0002	yes	2.81942	1.80625	-0.642396	0.01005	no	1.76783	2.05883	0.901099	0.642396	yes	yes	yes	no
ENSDARG00000075048	ENSDARG00000075048	lonrf1	chr14:35154722-35176681	27.9061	68.5556	1.29669	5e-05	yes	7.84106	101.492	3.69417	5e-05	yes	7.00655	35.2252	2.32983	5e-05	yes	74.8047	69.925	-0.09732	0.6165	no	-1.29669	-3.69417	-2.32983	0.09732	yes	yes	yes	no
ENSDARG00000056874	ENSDARG00000056874	lygl1	chr14:21894331-21899766	26.3632	9.769	-1.43225	5e-05	yes	87.3567	19.7	-2.14872	5e-05	yes	78.0599	33.2863	-1.22965	5e-05	yes	14.522	9.95028	-0.545427	0.01545	no	1.43225	2.14872	1.22965	0.545427	yes	yes	yes	no
ENSDARG00000090783	ENSDARG00000090783	mfap4	chr1:59845644-59847118	6.97087	2.34082	-1.57432	5e-05	yes	31.3141	2.45374	-3.67376	5e-05	yes	27.9817	8.80044	-1.66884	5e-05	yes	1.80876	2.38328	0.397946	0.1963	no	1.57432	3.67376	1.66884	-0.397946	yes	yes	yes	no
ENSDARG00000090557	ENSDARG00000090557	MFAP4 (13 of 14)	chr1:59825823-59826661	3.95061	1.46725	-1.42897	0.00015	yes	15.6684	2.0771	-2.91521	5e-05	yes	14.0008	4.99505	-1.48694	5e-05	yes	1.53088	1.4932	-0.0359493	1	no	1.42897	2.91521	1.48694	0.0359493	yes	yes	yes	no
ENSDARG00000088745	ENSDARG00000088745	MFAP4 (7 of 14)	chr1:59843266-59844660	4.43435	1.89138	-1.22928	5e-05	yes	22.0362	1.7054	-3.6917	5e-05	yes	19.6911	5.59984	-1.81408	5e-05	yes	1.25726	1.92706	0.616119	1	no	1.22928	3.6917	1.81408	-0.616119	yes	yes	yes	no
ENSDARG00000012395	ENSDARG00000012395	mmp13a	chr10:39959933-39979810	7.11951	0.544154	-3.70969	5e-05	yes	38.8699	1.49277	-4.7026	5e-05	yes	34.7334	8.96616	-1.95376	5e-05	yes	1.10065	0.55434	-0.989511	1	no	3.70969	4.7026	1.95376	0.989511	yes	yes	yes	no
ENSDARG00000042816	ENSDARG00000042816	mmp9	chr8:25134454-25148890	8.69979	1.47414	-2.56111	5e-05	yes	26.2144	2.35027	-3.47946	5e-05	yes	23.4245	10.9574	-1.09611	0.00035	yes	1.7323	1.50257	-0.205264	1	no	2.56111	3.47946	1.09611	0.205264	yes	yes	yes	no
ENSDARG00000074142	ENSDARG00000074142	MUC2 (3 of 3)	Zv9_NA774:34004-55478	47.1485	22.4167	-1.07264	5e-05	yes	21.0118	29.6043	0.494608	0.01135	yes	18.7757	59.4853	1.66366	5e-05	yes	21.8225	22.8646	0.0672983	0.7355	no	1.07264	-0.494608	-1.66366	-0.0672983	yes	no	yes	no
ENSDARG00000070331	ENSDARG00000070331	MUC5B (2 of 2)	chr25:8564865-8607907	4.83615	1.9509	-1.30972	5e-05	yes	13.4722	2.98073	-2.17625	5e-05	yes	12.0383	6.10563	-0.979415	0.0001	yes	2.19823	1.98715	-0.145645	0.51175	no	1.30972	2.17625	0.979415	0.145645	yes	yes	yes	no
ENSDARG00000026049	ENSDARG00000026049	mxf	chr15:4947009-4964855	5.77936	0.381442	-3.92138	5e-05	yes	12.8041	0.170846	-6.22777	5e-05	yes	11.4414	7.30299	-0.647705	0.00685	yes	0.125961	0.388707	1.62571	1	no	3.92138	6.22777	0.647705	-1.62571	yes	yes	no	no
ENSDARG00000041294	ENSDARG00000041294	noxo1a	chr3:62823513-62831176	4.7897	2.55079	-0.908991	0.00015	yes	37.7207	4.01722	-3.23109	5e-05	yes	33.7067	6.03784	-2.48093	5e-05	yes	2.96228	2.59886	-0.188827	0.41785	no	0.908991	3.23109	2.48093	0.188827	yes	yes	yes	no
ENSDARG00000056374	ENSDARG00000056374	noxo1b	chr12:19471568-19480387	12.9375	0.172008	-6.23293	5e-05	yes	49.8247	2.13884	-4.54196	5e-05	yes	44.5228	16.3678	-1.44368	5e-05	yes	1.57494	0.175262	-3.16772	1	no	6.23293	4.54196	1.44368	3.16772	yes	yes	yes	no
ENSDARG00000029766	ENSDARG00000029766	nr1i2	chr9:9724021-9786561	15.7585	31.3318	0.991495	5e-05	yes	12.564	31.2739	1.31566	5e-05	yes	11.2269	19.9067	0.826301	0.00045	yes	23.0513	31.9372	0.470392	0.01365	no	-0.991495	-1.31566	-0.826301	-0.470392	yes	yes	yes	no
ENSDARG00000024815	ENSDARG00000024815	ogfrl2	chr11:20511781-20518122	19.241	8.82792	-1.12404	5e-05	yes	14.4039	9.93934	-0.535241	0.0084	yes	12.8709	24.3599	0.920393	0.00025	yes	7.32625	8.9907	0.295359	0.14295	no	1.12404	0.535241	-0.920393	-0.295359	yes	no	yes	no
ENSDARG00000071082	ENSDARG00000071082	p4ha1b	chr17:19977555-19997359	3.77518	1.54026	-1.29337	5e-05	yes	18.0233	3.28304	-2.45676	5e-05	yes	16.1052	4.75353	-1.76045	5e-05	yes	2.41984	1.56957	-0.624547	0.01405	no	1.29337	2.45676	1.76045	0.624547	yes	yes	yes	no
ENSDARG00000039310	ENSDARG00000039310	parla	chr2:5186290-5203396	3.00078	5.35117	0.83452	0.00185	yes	2.45856	6.08238	1.30682	0.0001	yes	2.19688	3.79788	0.789738	0.0131	yes	4.48253	5.45273	0.282664	0.2666	no	-0.83452	-1.30682	-0.789738	-0.282664	yes	yes	no	no
ENSDARG00000076308	ENSDARG00000076308	pdp1	chr16:29067536-29071418	4.28369	7.53524	0.814801	0.0003	yes	2.56631	8.47541	1.72359	5e-05	yes	2.29318	5.40149	1.23601	5e-05	yes	6.24724	7.68382	0.298604	0.15505	no	-0.814801	-1.72359	-1.23601	-0.298604	yes	yes	yes	no
ENSDARG00000034503	ENSDARG00000034503	per2	chr2:48423771-48489514	18.9676	34.7353	0.872868	0.0005	yes	4.34976	68.9862	3.9873	5e-05	yes	3.88684	23.8996	2.62032	5e-05	yes	50.8511	35.4485	-0.520554	0.0102	no	-0.872868	-3.9873	-2.62032	0.520554	yes	yes	yes	no
ENSDARG00000015278	ENSDARG00000015278	plxnc1	chr4:17351305-17384995	2.90126	1.48848	-0.962846	0.0003	yes	8.05488	2.13549	-1.9153	5e-05	yes	7.19761	3.66243	-0.974718	0.0001	yes	1.57409	1.51559	-0.0546315	1	no	0.962846	1.9153	0.974718	0.0546315	yes	yes	yes	no
ENSDARG00000068874	ENSDARG00000068874	PTCHD3 (2 of 3)	chr4:61359683-61362524	13.3896	0.64691	-4.37141	5e-05	yes	10.9603	1.86583	-2.5544	5e-05	yes	9.7939	16.9969	0.795318	0.00525	yes	1.37527	0.65807	-1.06341	1	no	4.37141	2.5544	-0.795318	1.06341	yes	yes	no	no
ENSDARG00000018600	ENSDARG00000018600	retsat	chr3:39176168-39185099	42.4885	87.7604	1.0465	5e-05	yes	30.1814	105.034	1.79912	5e-05	yes	26.9691	53.6083	0.991148	5e-05	yes	77.4082	89.4588	0.208737	0.27505	no	-1.0465	-1.79912	-0.991148	-0.208737	yes	yes	yes	no
ENSDARG00000045999	ENSDARG00000045999	saa	chr7:13776634-13782564	20.9729	0.268097	-6.28962	5e-05	yes	106.655	1.34015	-6.31441	5e-05	yes	95.3031	26.4477	-1.84938	5e-05	yes	0.988523	0.272693	-1.858	1	no	6.28962	6.31441	1.84938	1.858	yes	yes	yes	no
ENSDARG00000054543	ENSDARG00000054543	samsn1a	chr15:28913457-28935841	4.02881	1.85543	-1.1186	5e-05	yes	11.0672	1.8465	-2.58342	5e-05	yes	9.88935	5.08899	-0.958495	0.0001	yes	1.36091	1.88962	0.473521	1	no	1.1186	2.58342	0.958495	-0.473521	yes	yes	yes	no
ENSDARG00000056795	ENSDARG00000056795	serpine1	chr7:27391451-27395882	8.52436	4.13379	-1.04413	5e-05	yes	31.3535	8.47525	-1.8873	5e-05	yes	28.0163	10.7562	-1.3811	5e-05	yes	6.24591	4.21209	-0.568375	0.012	no	1.04413	1.8873	1.3811	0.568375	yes	yes	yes	no
ENSDARG00000090689	ENSDARG00000090689	si:busm1-118j2.5	chr3:55974333-55975109	15.9783	2.92261	-2.45079	5e-05	yes	9.12806	4.46746	-1.03085	0.00215	yes	8.15658	20.1039	1.30144	5e-05	yes	3.2945	2.98058	-0.144466	0.6715	no	2.45079	1.03085	-1.30144	0.144466	yes	yes	yes	no
ENSDARG00000079651	ENSDARG00000079651	si:ch1073-174d20.2	chr25:38169903-38187928	11.2314	24.1225	1.10284	5e-05	yes	23.6791	44.2353	0.901581	5e-05	yes	21.1591	14.1715	-0.578279	0.01155	yes	32.6016	24.588	-0.406988	0.03575	no	-1.10284	-0.901581	0.578279	0.406988	yes	yes	no	no
ENSDARG00000076122	ENSDARG00000076122	si:ch211-160b11.4	chr9:35950170-35958131	59.0184	11.8781	-2.31286	5e-05	yes	46.2225	19.8527	-1.21926	5e-05	yes	41.3032	74.6489	0.853868	0.00045	yes	14.6373	12.0742	-0.277722	0.2476	no	2.31286	1.21926	-0.853868	0.277722	yes	yes	yes	no
ENSDARG00000093044	ENSDARG00000093044	si:ch211-161h7.5	chr24:21518373-21523502	308.177	570.999	0.889729	0.00025	yes	200.377	1033.9	2.36731	5e-05	yes	179.051	388.225	1.11652	0.00015	yes	762.175	582.228	-0.388538	0.0597	no	-0.889729	-2.36731	-1.11652	0.388538	yes	yes	yes	no
ENSDARG00000070011	ENSDARG00000070011	si:ch211-167j6.4	chr9:13164659-13170054	3.33236	7.4552	1.1617	0.00035	yes	2.20052	11.5909	2.39708	5e-05	yes	1.96633	4.2192	1.10147	0.002	yes	8.54641	7.59252	-0.17074	0.51215	no	-1.1617	-2.39708	-1.10147	0.17074	yes	yes	yes	no
ENSDARG00000079345	ENSDARG00000079345	si:ch211-217k17.10	chr1:52940811-52942027	9.06029	0.600458	-3.91542	5e-05	yes	4.13457	0.356659	-3.53512	5e-05	yes	3.69449	11.4609	1.63328	5e-05	yes	0.263119	0.611647	1.21698	1	no	3.91542	3.53512	-1.63328	-1.21698	yes	yes	yes	no
ENSDARG00000095730	ENSDARG00000095730	si:ch211-234p6.9	chr24:39624416-39624934	10.7581	1.92908	-2.47944	5e-05	yes	6.92523	1.03733	-2.73898	0.00015	yes	6.18819	13.5533	1.13106	0.00095	yes	0.765229	1.96591	1.36123	1	no	2.47944	2.73898	-1.13106	-1.36123	yes	yes	yes	no
ENSDARG00000094729	ENSDARG00000094729	si:ch211-42i9.4	chr1:18409841-18415795	2.38108	1.00689	-1.24172	0.0003	yes	6.05498	1.61545	-1.90619	5e-05	yes	5.4106	3.00904	-0.846487	0.0076	yes	1.19061	1.02547	-0.215415	1	no	1.24172	1.90619	0.846487	0.215415	yes	yes	yes	no
ENSDARG00000070656	ENSDARG00000070656	si:ch211-69g19.2	chr16:13802312-13810789	2.04093	0.965326	-1.08014	0.00025	yes	6.76328	2.83985	-1.25191	5e-05	yes	6.04344	2.58418	-1.22566	5e-05	yes	2.09271	0.982848	-1.09033	1	no	1.08014	1.25191	1.22566	1.09033	yes	yes	yes	no
ENSDARG00000090814	ENSDARG00000090814	si:dkey-18a10.3	chr10:34589537-34600723	19.4197	49.4569	1.34865	5e-05	yes	6.59455	78.9185	3.58102	5e-05	yes	5.89271	24.4683	2.05391	5e-05	yes	58.1687	50.4657	-0.204939	0.29665	no	-1.34865	-3.58102	-2.05391	0.204939	yes	yes	yes	no
ENSDARG00000094485	ENSDARG00000094485	si:dkey-27h10.2	chr1:35373887-35403730	2.01041	0.213105	-3.23785	5e-05	yes	8.69487	0.255292	-5.08995	5e-05	yes	7.76957	2.53656	-1.61496	5e-05	yes	0.188696	0.216957	0.201347	1	no	3.23785	5.08995	1.61496	-0.201347	yes	yes	yes	no
ENSDARG00000041433	ENSDARG00000041433	si:dkey-7c18.24	chr20:46282287-46286102	36.2317	18.0506	-1.00521	5e-05	yes	80.2499	28.4842	-1.49434	5e-05	yes	71.7094	45.8036	-0.646701	0.00955	yes	20.9924	18.3681	-0.192662	0.3705	no	1.00521	1.49434	0.646701	0.192662	yes	yes	no	no
ENSDARG00000093382	ENSDARG00000093382	si:dkey-88p24.9	chr10:27641758-27645077	9.23298	17.3821	0.912732	0.0009	yes	6.90799	26.8191	1.95692	5e-05	yes	6.1731	11.689	0.921088	0.00355	yes	19.765	17.7124	-0.15819	0.507	no	-0.912732	-1.95692	-0.921088	0.15819	yes	yes	yes	no
ENSDARG00000090352	ENSDARG00000090352	si:dkey-97i18.5	chr16:33930174-33932357	90.2915	18.2154	-2.30943	5e-05	yes	257.843	18.1945	-3.82492	5e-05	yes	230.402	113.948	-1.01578	5e-05	yes	13.4123	18.5424	0.467267	0.0226	no	2.30943	3.82492	1.01578	-0.467267	yes	yes	yes	no
ENSDARG00000059923	ENSDARG00000059923	slc25a47a	chr20:53983134-53996464	4.89382	10.5085	1.10253	5e-05	yes	2.88252	14.2965	2.31026	5e-05	yes	2.57576	6.18272	1.26325	0.0001	yes	10.537	10.7058	0.0229308	0.9136	no	-1.10253	-2.31026	-1.26325	-0.0229308	yes	yes	yes	no
ENSDARG00000007371	ENSDARG00000007371	slc26a3	chr4:17893142-17903728	2.21903	1.11638	-0.991098	0.00135	yes	5.63927	0.740507	-2.92892	5e-05	yes	5.03903	2.80623	-0.844514	0.00215	yes	0.545987	1.13443	1.05503	1	no	0.991098	2.92892	0.844514	-1.05503	yes	yes	yes	no
ENSDARG00000058731	ENSDARG00000058731	slc2a6	chr8:13374645-13384835	2.86099	0.569226	-2.32944	5e-05	yes	10.5065	0.4705	-4.48094	5e-05	yes	9.38838	3.61197	-1.37809	5e-05	yes	0.346789	0.580254	0.742624	1	no	2.32944	4.48094	1.37809	-0.742624	yes	yes	yes	no
ENSDARG00000055252	ENSDARG00000055252	SNAP23 (2 of 2)	chr17:33639323-33646778	2.91846	0.447339	-2.70577	5e-05	yes	17.8629	1.78442	-3.32344	5e-05	yes	15.9618	3.68398	-2.11529	5e-05	yes	1.31581	0.454842	-1.53252	1	no	2.70577	3.32344	2.11529	1.53252	yes	yes	yes	no
ENSDARG00000055901	ENSDARG00000055901	steap4	chr16:29963110-29977411	6.67738	3.04543	-1.13264	5e-05	yes	24.4854	2.71992	-3.17029	5e-05	yes	21.8796	8.43581	-1.37499	5e-05	yes	2.00547	3.09811	0.627451	0.02205	no	1.13264	3.17029	1.37499	-0.627451	yes	yes	yes	no
ENSDARG00000037587	ENSDARG00000037587	SYNPR (1 of 2)	chr11:20044834-20114564	1.04262	2.26924	1.12199	5e-05	yes	2.93377	4.38075	0.57842	0.00865	yes	2.62155	1.31757	-0.992545	0.00015	yes	3.22823	2.31248	-0.481304	0.02475	no	-1.12199	-0.57842	0.992545	0.481304	yes	no	yes	no
ENSDARG00000005454	ENSDARG00000005454	tacc3	chr13:36282171-36293842	2.4367	0.739369	-1.72056	0.00025	yes	7.66943	2.64258	-1.53717	5e-05	yes	6.85313	3.08417	-1.15188	0.00025	yes	1.94739	0.7524	-1.37197	1	no	1.72056	1.53717	1.15188	1.37197	yes	yes	yes	no
ENSDARG00000063430	ENSDARG00000063430	THBS1 (2 of 2)	chr17:507055-521798	5.63763	2.20358	-1.35524	5e-05	yes	19.4423	3.43368	-2.50137	5e-05	yes	17.3731	7.10931	-1.28907	5e-05	yes	2.53041	2.24359	-0.173562	0.4691	no	1.35524	2.50137	1.28907	0.173562	yes	yes	yes	no
ENSDARG00000075261	ENSDARG00000075261	timp2b	chr3:58446853-58480406	2.68452	0.679307	-1.98253	5e-05	yes	13.1293	1.35396	-3.27753	5e-05	yes	11.732	3.37964	-1.7955	5e-05	yes	0.99793	0.692111	-0.527935	1	no	1.98253	3.27753	1.7955	0.527935	yes	yes	yes	no
ENSDARG00000044034	ENSDARG00000044034	tmem86a	chr25:24973585-24985789	3.71009	6.54854	0.819719	0.00045	yes	3.1607	6.69947	1.0838	5e-05	yes	2.82429	4.69114	0.73205	0.0105	yes	4.93765	6.67302	0.434515	0.05595	no	-0.819719	-1.0838	-0.73205	-0.434515	yes	yes	no	no
ENSDARG00000058160	ENSDARG00000058160	tnfaip2b	chr13:6779767-6791402	3.11523	1.42949	-1.12383	0.00105	yes	13.1587	2.1904	-2.58675	5e-05	yes	11.7582	3.9278	-1.58187	5e-05	yes	1.61448	1.45585	-0.149205	1	no	1.12383	2.58675	1.58187	0.149205	yes	yes	yes	no
ENSDARG00000024488	ENSDARG00000024488	top2a	chr12:11702255-11719558	2.85284	0.639433	-2.15753	5e-05	yes	7.71751	2.33	-1.72781	5e-05	yes	6.89611	3.61001	-0.933779	0.00015	yes	1.71739	0.650577	-1.40042	1	no	2.15753	1.72781	0.933779	1.40042	yes	yes	yes	no
ENSDARG00000078654	ENSDARG00000078654	tpx2	chr23:32267152-32276800	3.91093	1.2674	-1.62564	0.0007	yes	11.0547	3.24593	-1.76795	5e-05	yes	9.8781	4.95058	-0.996635	0.0072	yes	2.39287	1.28963	-0.891789	0.0573	no	1.62564	1.76795	0.996635	0.891789	yes	yes	yes	no
ENSDARG00000041554	ENSDARG00000041554	unc93a	chr20:43410791-43421238	44.5407	11.3187	-1.97641	5e-05	yes	33.6696	18.4605	-0.867	5e-05	yes	30.0863	56.4009	0.906608	0.0001	yes	13.605	11.523	-0.239624	0.23165	no	1.97641	0.867	-0.906608	0.239624	yes	yes	yes	no
ENSDARG00000088636	ENSDARG00000088636	wu:fa03e10	chr1:57116381-57122151	23.241	12.8539	-0.854469	0.0001	yes	89.8305	18.8407	-2.25335	5e-05	yes	80.2697	29.357	-1.45115	5e-05	yes	13.8851	13.0783	-0.0863634	0.6592	no	0.854469	2.25335	1.45115	0.0863634	yes	yes	yes	no
ENSDARG00000039754	ENSDARG00000039754	xpc	chr8:26860932-26883893	10.8066	23.1722	1.10049	5e-05	yes	2.89015	32.1316	3.47477	5e-05	yes	2.58257	13.6286	2.39975	5e-05	yes	23.6856	23.6356	-0.00304987	0.9882	no	-1.10049	-3.47477	-2.39975	0.00304987	yes	yes	yes	no
ENSDARG00000004167	ENSDARG00000004167	zgc:110366	chr2:6837104-6853273	5.24346	10.6431	1.02133	5e-05	yes	3.55656	12.4264	1.80486	5e-05	yes	3.17807	6.62262	1.05925	0.0002	yes	9.1597	10.842	0.243262	0.30395	no	-1.02133	-1.80486	-1.05925	-0.243262	yes	yes	yes	no
ENSDARG00000053483	ENSDARG00000053483	zgc:113054	chr6:43381520-43406057	5.97605	25.097	2.07025	5e-05	yes	2.85153	25.4059	3.15536	5e-05	yes	2.54805	7.5542	1.56788	5e-05	yes	18.7262	25.5915	0.450602	0.02095	no	-2.07025	-3.15536	-1.56788	-0.450602	yes	yes	yes	no
ENSDARG00000069453	ENSDARG00000069453	zgc:113314	chr9:31454796-31460425	5.24254	2.36876	-1.14614	5e-05	yes	17.1982	5.5157	-1.64064	5e-05	yes	15.3679	6.63073	-1.21268	5e-05	yes	4.06561	2.4121	-0.753181	0.0118	no	1.14614	1.64064	1.21268	0.753181	yes	yes	yes	no
ENSDARG00000017038	ENSDARG00000017038	zgc:152670	chr2:44409990-44424444	11.2495	0.18236	-5.94693	5e-05	yes	2.63751	0.440065	-2.58339	5e-05	yes	2.3568	14.2363	2.59467	5e-05	yes	0.324333	0.185816	-0.803601	1	no	5.94693	2.58339	-2.59467	0.803601	yes	yes	yes	no
ENSDARG00000043562	ENSDARG00000043562	zgc:65997	chr17:23378943-23381895	12.3138	25.6317	1.05766	5e-05	yes	7.2735	34.465	2.24441	5e-05	yes	6.4994	15.5652	1.25995	5e-05	yes	25.4037	26.1148	0.0398314	0.83265	no	-1.05766	-2.24441	-1.25995	-0.0398314	yes	yes	yes	no
ENSDARG00000057911	ENSDARG00000057911	zgc:86709	chr20:10151616-10161149	4.51376	2.41788	-0.900589	0.00065	yes	12.188	3.27243	-1.89702	5e-05	yes	10.8909	5.68588	-0.937666	0.0004	yes	2.4124	2.46399	0.0305277	0.90685	no	0.900589	1.89702	0.937666	-0.0305277	yes	yes	yes	no
ENSDARG00000053136	ENSDARG00000053136	b2m	chr4:11857919-11860013	51.1073	20.3254	-1.33024	5e-05	yes	11.8672	5.89401	-1.00966	0.0215	no	10.6041	64.6213	2.60739	5e-05	yes	4.34551	20.7088	2.25264	5e-05	yes	1.33024	1.00966	-2.60739	-2.25264	yes	no	yes	yes
ENSDARG00000029377	ENSDARG00000029377	C7orf10 (1 of 2)	chr24:2840245-2840987	6.25259	13.5271	1.11332	0.00135	yes	3.42283	8.60363	1.32976	0.01545	no	3.05849	7.90303	1.36959	0.0043	yes	6.33892	13.7929	1.12161	0.00545	yes	-1.11332	-1.32976	-1.36959	-1.12161	yes	no	yes	yes
ENSDARG00000076178	ENSDARG00000076178	CABZ01069162.1	Zv9_NA260:1011-3880	4.36819	8.73614	0.999958	5e-05	yes	20.5954	25.2125	0.291814	0.1497	no	18.4036	5.50995	-1.73988	5e-05	yes	18.5819	8.90692	-1.0609	5e-05	yes	-0.999958	-0.291814	1.73988	1.0609	yes	no	yes	yes
ENSDARG00000010729	ENSDARG00000010729	CABZ01073795.1	chr10:4452091-4455744	5.53045	2.65738	-1.05739	5e-05	yes	2.16158	0.132331	-4.02986	1	no	1.93152	7.01584	1.86088	5e-05	yes	0.0975236	2.70773	4.79519	5e-05	yes	1.05739	4.02986	-1.86088	-4.79519	yes	no	yes	yes
ENSDARG00000032976	ENSDARG00000032976	cmlc1	chr5:67435813-67436609	29.6172	9.82048	-1.59257	5e-05	yes	24.8631	33.531	0.43149	0.06295	no	22.217	37.4134	0.751896	0.00135	yes	24.7393	10.0192	-1.30404	5e-05	yes	1.59257	-0.43149	-0.751896	1.30404	yes	no	no	yes
ENSDARG00000078177	ENSDARG00000078177	cxcr3.1	chr16:13373962-13397237	6.14877	3.41947	-0.846527	0.00245	yes	0.743706	0.851254	0.194857	1	no	0.664599	7.77827	3.54889	5e-05	yes	0.627502	3.47624	2.46983	5e-05	yes	0.846527	-0.194857	-3.54889	-2.46983	yes	no	yes	yes
ENSDARG00000009262	ENSDARG00000009262	FAR2	chr4:1849439-1897600	2.03488	0.994562	-1.03281	5e-05	yes	5.15588	3.65866	-0.494903	0.03345	no	4.60718	2.56937	-0.842467	0.00235	yes	2.69717	1.01272	-1.41321	5e-05	yes	1.03281	0.494903	0.842467	1.41321	yes	no	yes	yes
ENSDARG00000088553	ENSDARG00000088553	FP243385.3	chr3:10448061-10449114	23.8998	3.31695	-2.84907	5e-05	yes	1.53682	0.962953	-0.674412	1	no	1.37327	30.2237	4.45999	5e-05	yes	0.710072	3.37315	2.24806	5e-05	yes	2.84907	0.674412	-4.45999	-2.24806	yes	no	yes	yes
ENSDARG00000002917	ENSDARG00000002917	GLS2 (2 of 2)	chr22:10193037-10221138	2.7857	5.0219	0.850194	0.00195	yes	11.571	10.5093	-0.138845	0.5425	no	10.3395	3.52291	-1.55333	5e-05	yes	7.74782	5.11087	-0.600224	0.00855	yes	-0.850194	0.138845	1.55333	0.600224	yes	no	yes	no
ENSDARG00000005944	ENSDARG00000005944	gnb1b	chr6:53177552-53206835	2.1586	1.14001	-0.921051	0.00075	yes	6.14259	6.11442	-0.00663156	0.97455	no	5.48879	2.72855	-1.00835	5e-05	yes	4.50713	1.1583	-1.9602	5e-05	yes	0.921051	0.00663156	1.00835	1.9602	yes	no	yes	yes
ENSDARG00000089362	ENSDARG00000089362	grn1	chr19:41146726-41165805	89.1875	45.2644	-0.978465	5e-05	yes	49.7912	42.2433	-0.237167	0.24865	no	44.4922	112.756	1.34158	5e-05	yes	31.1396	46.1032	0.566117	0.004	yes	0.978465	0.237167	-1.34158	-0.566117	yes	no	yes	no
ENSDARG00000076919	ENSDARG00000076919	igdcc4	chr7:32960172-33093904	3.32477	5.92491	0.833536	0.0001	yes	1.33105	2.26198	0.765021	1	no	1.18939	4.20055	1.82035	5e-05	yes	1.66727	6.03987	1.85704	5e-05	yes	-0.833536	-0.765021	-1.82035	-1.85704	yes	no	yes	yes
ENSDARG00000071076	ENSDARG00000071076	ldhbb	chr25:3382945-3392649	35.7253	73.1876	1.03465	5e-05	yes	27.7664	19.0703	-0.542011	0.04165	no	24.8116	45.2047	0.865457	0.00225	yes	14.0615	74.4889	2.40528	5e-05	yes	-1.03465	0.542011	-0.865457	-2.40528	yes	no	yes	yes
ENSDARG00000075963	ENSDARG00000075963	mhc1uba	chr19:7695389-7723636	6.82939	3.05771	-1.1593	5e-05	yes	0.0882548	0.0519409	-0.764805	1	no	0.0788622	8.63233	6.77427	0.00175	yes	0.0382471	3.11345	6.34702	0.0033	yes	1.1593	0.764805	-6.77427	-6.34702	yes	no	yes	yes
ENSDARG00000019713	ENSDARG00000019713	oatx	chr21:42642621-42654610	2.38574	4.27442	0.841296	0.00125	yes	0.0781036	0.251305	1.68598	1	no	0.0697938	3.0052	5.42822	0.0002	yes	0.185237	4.35956	4.55674	5e-05	yes	-0.841296	-1.68598	-5.42822	-4.55674	yes	no	yes	yes
ENSDARG00000074457	ENSDARG00000074457	PFKFB1 (1 of 2)	chr23:12853564-12900222	2.76404	5.23484	0.921368	0.00095	yes	0.149219	0.897574	2.58859	1	no	0.133343	3.49968	4.714	0.0002	yes	0.661839	5.32651	3.00864	5e-05	yes	-0.921368	-2.58859	-4.714	-3.00864	yes	no	yes	yes
ENSDARG00000043781	ENSDARG00000043781	PSMB10	chr4:61218242-61227140	12.5744	7.1622	-0.812012	0.0003	yes	5.62549	5.03181	-0.160903	0.56285	no	5.02682	15.8816	1.65964	5e-05	yes	3.70941	7.29973	0.976653	0.0003	yes	0.812012	0.160903	-1.65964	-0.976653	yes	no	yes	yes
ENSDARG00000074712	ENSDARG00000074712	si:ch211-186e20.2	chr5:30496026-30497898	5.30938	12.9397	1.28519	5e-05	yes	0.822423	0.544396	-0.595224	1	no	0.73492	6.70993	3.19064	5e-05	yes	0.401504	13.1803	5.03682	5e-05	yes	-1.28519	0.595224	-3.19064	-5.03682	yes	no	yes	yes
ENSDARG00000092667	ENSDARG00000092667	si:ch211-271e10.2	chr5:40212590-40215571	6.16856	3.13	-0.978769	0.00075	yes	1.5702	0.948765	-0.726822	1	no	1.40308	7.81116	2.47694	5e-05	yes	0.699357	3.188	2.18855	5e-05	yes	0.978769	0.726822	-2.47694	-2.18855	yes	no	yes	yes
ENSDARG00000073994	ENSDARG00000073994	si:ch211-276k2.1	chr22:38301775-38304980	15.5289	8.12544	-0.934436	0.0002	yes	2.50737	0.215778	-3.53855	1	no	2.24051	19.6603	3.13339	5e-05	yes	0.159068	8.28336	5.7025	0.0001	yes	0.934436	3.53855	-3.13339	-5.7025	yes	no	yes	yes
ENSDARG00000092908	ENSDARG00000092908	si:dkey-201l21.1	chr7:3403401-3414982	89.5811	14.9248	-2.58548	5e-05	yes	2.60771	1.18453	-1.13847	1	no	2.33008	113.756	5.60943	5e-05	yes	0.873838	15.1837	4.11901	5e-05	yes	2.58548	1.13847	-5.60943	-4.11901	yes	no	yes	yes
ENSDARG00000095048	ENSDARG00000095048	si:dkey-250k15.7	chr16:13433554-13459598	38.236	19.2275	-0.991763	0.00045	yes	12.8215	11.996	-0.0960162	0.7055	no	11.457	48.3689	2.07785	5e-05	yes	8.84029	19.5684	1.14636	0.0001	yes	0.991763	0.0960162	-2.07785	-1.14636	yes	no	yes	yes
ENSDARG00000074268	ENSDARG00000074268	si:dkey-27n6.10	chr1:37403582-37417599	1.79194	3.23624	0.852798	0.0005	yes	0.0637041	0.061948	-0.0403281	1	no	0.056924	2.27101	5.31815	5e-05	yes	0.045696	3.29922	6.17391	5e-05	yes	-0.852798	0.0403281	-5.31815	-6.17391	yes	no	yes	yes
ENSDARG00000095532	ENSDARG00000095532	si:dkey-58f10.13	chr5:40262581-40265891	6.05841	3.08445	-0.973929	0.00075	yes	1.11266	0.504448	-1.14123	1	no	0.994226	7.67893	2.94926	5e-05	yes	0.372175	3.14157	3.07744	5e-05	yes	0.973929	1.14123	-2.94926	-3.07744	yes	no	yes	yes
ENSDARG00000093173	ENSDARG00000093173	si:dkey-93m18.6	chr21:6072240-6079120	3.22716	5.966	0.886501	0.0014	yes	0.219473	0.518345	1.23987	1	no	0.196118	4.07919	4.37849	5e-05	yes	0.381814	6.08372	3.99401	5e-05	yes	-0.886501	-1.23987	-4.37849	-3.99401	yes	no	yes	yes
ENSDARG00000070168	ENSDARG00000070168	sod3a	chr7:73892675-73896143	5.79484	10.2121	0.817443	0.00045	yes	1.98096	2.94045	0.569842	0.089	no	1.77013	7.32287	2.04855	5e-05	yes	2.16627	10.4026	2.26366	5e-05	yes	-0.817443	-0.569842	-2.04855	-2.26366	yes	no	yes	yes
ENSDARG00000031664	ENSDARG00000031664	sox21a	chr6:7331079-7332155	2.40557	4.22759	0.813458	0.0031	yes	0.341428	0.245447	-0.476171	1	no	0.305088	3.02967	3.31186	5e-05	yes	0.180939	4.31059	4.57431	5e-05	yes	-0.813458	0.476171	-3.31186	-4.57431	yes	no	yes	yes
ENSDARG00000076063	ENSDARG00000076063	tprn	chr5:62905706-62946700	9.62123	4.67816	-1.04028	5e-05	yes	5.82825	4.27658	-0.446605	0.053	no	5.20801	12.1436	1.22139	5e-05	yes	3.15204	4.7668	0.596735	0.0067	yes	1.04028	0.446605	-1.22139	-0.596735	yes	no	yes	no
ENSDARG00000040574	ENSDARG00000040574	zgc:136410	chr21:44489216-44496519	22.6157	58.8756	1.38034	5e-05	yes	0.47816	1.43343	1.58391	1	no	0.427273	28.5428	6.06183	5e-05	yes	1.05685	59.9882	5.82683	5e-05	yes	-1.38034	-1.58391	-6.06183	-5.82683	yes	no	yes	yes
ENSDARG00000003977	ENSDARG00000003977	zgc:153896	chr20:25909915-25915613	230.012	131.373	-0.808034	0.0014	yes	88.2717	92.2735	0.0639658	0.73335	no	78.8766	289.49	1.87584	5e-05	yes	68.0256	133.891	0.976912	5e-05	yes	0.808034	-0.0639658	-1.87584	-0.976912	yes	no	yes	yes
ENSDARG00000091136	ENSDARG00000091136	zgc:174259	chr5:30486927-30489465	11.2667	21.368	0.92338	5e-05	yes	1.4192	1.46359	0.044428	1	no	1.26821	14.238	3.48888	5e-05	yes	1.07914	21.7575	4.33355	5e-05	yes	-0.92338	-0.044428	-3.48888	-4.33355	yes	no	yes	yes
ENSDARG00000063001	ENSDARG00000063001	atp8a1	chr14:47896353-47929320	3.73091	2.03212	-0.876543	0.00215	yes	2.4557	2.11531	-0.215263	0.54485	no	2.19436	4.70328	1.09987	0.00105	yes	1.55874	2.07075	0.409771	1	no	0.876543	0.215263	-1.09987	-0.409771	yes	no	yes	no
ENSDARG00000096304	ENSDARG00000096304	btr31	chr23:46346822-46350363	8.72548	4.67495	-0.900285	0.00175	yes	3.91984	5.62521	0.521111	0.14615	no	3.50264	11.0252	1.65428	5e-05	yes	4.14646	4.76339	0.20011	0.53215	no	0.900285	-0.521111	-1.65428	-0.20011	yes	no	yes	no
ENSDARG00000016541	ENSDARG00000016541	BX004980.1	chr14:34542321-34560736	2.14862	1.05128	-1.03126	5e-05	yes	1.82204	0.900596	-1.0166	1	no	1.62812	2.71493	0.737708	0.0064	yes	0.663812	1.07048	0.689415	1	no	1.03126	1.0166	-0.737708	-0.689415	yes	no	no	no
ENSDARG00000091278	ENSDARG00000091278	BX322588.1	chr2:39264718-39267386	7.86581	0.0945118	-6.37896	0.0017	yes	3.04293	0.0613118	-5.63315	1	no	2.71906	9.91268	1.86617	5e-05	yes	0.0452575	0.09596	1.08428	1	no	6.37896	5.63315	-1.86617	-1.08428	yes	no	yes	no
ENSDARG00000077651	ENSDARG00000077651	BX927317.3	chr3:8013885-8041799	4.04765	1.99721	-1.0191	0.00035	yes	0.155935	0.212046	0.443427	1	no	0.139338	5.14131	5.20548	5e-05	yes	0.156259	2.03518	3.70315	1	no	1.0191	-0.443427	-5.20548	-3.70315	yes	no	yes	no
ENSDARG00000042008	ENSDARG00000042008	BX936298.1	chr22:19856954-19859869	6.28362	2.22391	-1.4985	5e-05	yes	1.52213	0.560996	-1.44003	1	no	1.36011	7.94141	2.54568	5e-05	yes	0.413733	2.26724	2.45416	1	no	1.4985	1.44003	-2.54568	-2.45416	yes	no	yes	no
ENSDARG00000091068	ENSDARG00000091068	CABZ01063789.1	chr17:49629199-49636494	3.12825	1.28469	-1.28394	0.0014	yes	0	0.0313556	inf	1	no	0	3.94874	inf	5e-05	yes	0.0230781	1.30916	5.82598	1	no	1.28394	#VALUE!	#VALUE!	-5.82598	yes	no	no	no
ENSDARG00000043851	ENSDARG00000043851	CABZ01092943.1	Zv9_NA135:25442-29694	7.77302	3.66108	-1.08621	5e-05	yes	4.9852	4.3019	-0.212675	0.4854	no	4.45463	9.82406	1.14101	0.0003	yes	3.1712	3.72877	0.233673	0.42765	no	1.08621	0.212675	-1.14101	-0.233673	yes	no	yes	no
ENSDARG00000058341	ENSDARG00000058341	casp8l1	chr6:13005671-13010191	2.094	1.051	-0.994494	0.00175	yes	0.7545	0.316571	-1.25299	1	no	0.674195	2.6495	1.97448	5e-05	yes	0.233259	1.07043	2.19818	1	no	0.994494	1.25299	-1.97448	-2.19818	yes	no	yes	no
ENSDARG00000089432	ENSDARG00000089432	CR352328.2	chr7:20772654-20778737	6.67694	2.60115	-1.36004	5e-05	yes	1.43944	0.450727	-1.67518	1	no	1.28622	8.47506	2.72008	5e-05	yes	0.332199	2.6516	2.99675	1	no	1.36004	1.67518	-2.72008	-2.99675	yes	no	yes	no
ENSDARG00000055476	ENSDARG00000055476	CR352329.1	chr24:6437029-6442649	3.67644	1.34614	-1.44948	5e-05	yes	2.1709	0.410735	-2.40201	1	no	1.93983	4.65275	1.26215	5e-05	yes	0.302583	1.37229	2.18118	1	no	1.44948	2.40201	-1.26215	-2.18118	yes	no	yes	no
ENSDARG00000017504	ENSDARG00000017504	CR457462.1	chr7:9529245-9569833	2.37949	1.35845	-0.808686	0.0022	yes	1.99334	1.22335	-0.704352	1	no	1.78119	3.00514	0.75459	0.00795	yes	0.901657	1.38393	0.618115	1	no	0.808686	0.704352	-0.75459	-0.618115	yes	no	no	no
ENSDARG00000074992	ENSDARG00000074992	CRFA31.2	chr3:42597117-42607622	2.46965	1.20963	-1.02974	0.00015	yes	1.12282	0.568786	-0.981171	1	no	1.00332	3.11715	1.63545	5e-05	yes	0.419222	1.23261	1.55593	1	no	1.02974	0.981171	-1.63545	-1.55593	yes	no	yes	no
ENSDARG00000071456	ENSDARG00000071456	crp7	chr24:39640520-39695017	3.62023	1.08811	-1.73426	0.0004	yes	1.26323	0.345429	-1.87065	1	no	1.1288	4.56449	2.01566	0.0002	yes	0.254584	1.11006	2.12442	1	no	1.73426	1.87065	-2.01566	-2.12442	yes	no	yes	no
ENSDARG00000038587	ENSDARG00000038587	CU929150.1	chr2:45221498-45222824	5.07155	0.879097	-2.52833	5e-05	yes	0.664886	0.253549	-1.39085	1	no	0.594135	6.39603	3.42831	5e-05	yes	0.18672	0.896286	2.26308	1	no	2.52833	1.39085	-3.42831	-2.26308	yes	no	yes	no
ENSDARG00000089050	ENSDARG00000089050	CUZD1 (2 of 2)	chr17:21700056-21709731	147.115	83.0607	-0.82471	0.0001	yes	129.314	116.337	-0.152559	0.43345	no	115.552	185.785	0.685097	0.00425	yes	85.7748	84.6656	-0.0187776	0.92625	no	0.82471	0.152559	-0.685097	0.0187776	yes	no	no	no
ENSDARG00000075730	ENSDARG00000075730	dnph1	chr13:3872912-3878539	7.91436	4.4169	-0.841437	0.00235	yes	5.72397	3.77251	-0.601493	0.0718	no	5.11475	10.0152	0.969455	0.00185	yes	2.78083	4.50011	0.694445	0.03175	no	0.841437	0.601493	-0.969455	-0.694445	yes	no	yes	no
ENSDARG00000075504	ENSDARG00000075504	DTX3L	chr11:1550716-1572549	6.3665	3.0196	-1.07614	5e-05	yes	3.19958	2.87657	-0.153532	0.48335	no	2.85903	8.05446	1.49426	5e-05	yes	2.1205	3.07614	0.536718	0.01145	no	1.07614	0.153532	-1.49426	-0.536718	yes	no	yes	no
ENSDARG00000075029	ENSDARG00000075029	erap2	chr5:56103916-56120561	4.60811	2.1581	-1.09441	5e-05	yes	2.72234	2.11271	-0.365749	0.13855	no	2.4326	5.82583	1.25996	5e-05	yes	1.55743	2.19824	0.497185	1	no	1.09441	0.365749	-1.25996	-0.497185	yes	no	yes	no
ENSDARG00000089434	ENSDARG00000089434	etv7	chr23:5137882-5143619	5.40074	2.87503	-0.909582	0.00285	yes	3.2406	1.97695	-0.712983	1	no	2.89568	6.83053	1.23809	0.0004	yes	1.45723	2.92795	1.00666	1	no	0.909582	0.712983	-1.23809	-1.00666	yes	no	yes	no
ENSDARG00000069193	ENSDARG00000069193	ETV7 (2 of 2)	chr23:5234757-5241658	3.70707	1.72958	-1.09986	0.00075	yes	2.1384	1.51017	-0.501821	1	no	1.91082	4.69278	1.29626	0.0004	yes	1.11293	1.76324	0.663867	1	no	1.09986	0.501821	-1.29626	-0.663867	yes	no	yes	no
ENSDARG00000031683	ENSDARG00000031683	fos	chr20:46803307-46805437	33.1375	18.5359	-0.838144	0.00115	yes	21.2432	30.0706	0.501352	0.02305	no	18.9824	41.8223	1.13961	0.0001	yes	22.1507	18.8993	-0.229021	0.3061	no	0.838144	-0.501352	-1.13961	0.229021	yes	no	yes	no
ENSDARG00000086323	ENSDARG00000086323	FP243385.2	chr3:10444761-10447011	15.3359	1.7756	-3.11054	5e-05	yes	1.1526	0.508136	-1.18161	1	no	1.02993	19.3946	4.23503	5e-05	yes	0.374717	1.80591	2.26885	1	no	3.11054	1.18161	-4.23503	-2.26885	yes	no	yes	no
ENSDARG00000009161	ENSDARG00000009161	ftr55	chr19:14855090-14866847	4.30078	1.9528	-1.13905	5e-05	yes	2.9008	1.87809	-0.627184	0.0397	no	2.59206	5.44222	1.0701	5e-05	yes	1.38417	1.98744	0.521891	1	no	1.13905	0.627184	-1.0701	-0.521891	yes	no	yes	no
ENSDARG00000070317	ENSDARG00000070317	irge4	chr16:28061735-28069060	3.44475	1.37936	-1.3204	5e-05	yes	2.28569	2.03247	-0.169398	0.5645	no	2.04238	4.36684	1.09634	0.0003	yes	1.49787	1.40147	-0.0959782	1	no	1.3204	0.169398	-1.09634	0.0959782	yes	no	yes	no
ENSDARG00000036084	ENSDARG00000036084	itln2	chr7:34480037-34482816	22.6105	0.380211	-5.89405	5e-05	yes	0.965327	0.298003	-1.69569	1	no	0.862596	28.5597	5.04915	5e-05	yes	0.21967	0.387685	0.819549	1	no	5.89405	1.69569	-5.04915	-0.819549	yes	no	yes	no
ENSDARG00000089023	ENSDARG00000089023	MUC2 (1 of 3)	Zv9_NA447:521-10065	44.9618	22.58	-0.993655	5e-05	yes	22.7506	30.7297	0.433725	0.02755	no	20.3295	56.7249	1.48041	5e-05	yes	22.6528	23.0281	0.0237071	0.907	no	0.993655	-0.433725	-1.48041	-0.0237071	yes	no	yes	no
ENSDARG00000092648	ENSDARG00000092648	mvd	chr18:30957394-30957584	40.12	17.3217	-1.21174	0.00185	yes	17.0982	24.7625	0.534308	0.27605	no	15.2782	50.5467	1.72615	0.0002	yes	18.2551	17.6338	-0.0499533	0.9097	no	1.21174	-0.534308	-1.72615	0.0499533	yes	no	yes	no
ENSDARG00000008019	ENSDARG00000008019	mxg	chr25:20185732-20204416	4.31166	0.0493726	-6.44839	5e-05	yes	0.412807	0.0563732	-2.87238	1	no	0.368869	5.44766	3.88446	5e-05	yes	0.0415658	0.0503094	0.275433	1	no	6.44839	2.87238	-3.88446	-0.275433	yes	no	yes	no
ENSDARG00000043237	ENSDARG00000043237	nfil3-2	chr3:13875230-13876856	4.56502	2.29453	-0.992422	0.00065	yes	1.15479	2.47502	1.09981	1	no	1.03188	5.79799	2.49028	5e-05	yes	1.82466	2.33619	0.35653	1	no	0.992422	-1.09981	-2.49028	-0.35653	yes	no	yes	no
ENSDARG00000000796	ENSDARG00000000796	nr4a1	chr23:32389911-32396444	4.68195	1.92514	-1.28214	5e-05	yes	3.30492	3.59167	0.12004	0.6032	no	2.95318	5.91342	1.00172	5e-05	yes	2.64688	1.96364	-0.430764	0.06715	no	1.28214	-0.12004	-1.00172	0.430764	yes	no	yes	no
ENSDARG00000057933	ENSDARG00000057933	OGFR (3 of 4)	chr11:21694271-21701421	8.66821	4.64567	-0.899847	0.0002	yes	7.50639	5.33547	-0.492505	0.05555	no	6.70751	10.9594	0.708322	0.0079	yes	3.93186	4.73087	0.266894	0.29775	no	0.899847	0.492505	-0.708322	-0.266894	yes	no	no	no
ENSDARG00000062664	ENSDARG00000062664	oxnad1	chr19:20756787-20776843	7.61413	15.1896	0.996334	0.00015	yes	18.6201	24.3467	0.386868	0.09625	no	16.6385	9.61331	-0.791421	0.0039	yes	17.9452	15.4762	-0.213547	0.3508	no	-0.996334	-0.386868	0.791421	0.213547	yes	no	no	no
ENSDARG00000032640	ENSDARG00000032640	PDXK (2 of 3)	chr9:20236677-20264130	2.29634	1.08457	-1.08221	0.0017	yes	0.0300244	0.0842356	1.48829	1	no	0.0268287	2.88985	6.75107	0.0011	yes	0.0621442	1.10688	4.15473	1	no	1.08221	-1.48829	-6.75107	-4.15473	yes	no	yes	no
ENSDARG00000001656	ENSDARG00000001656	psmb10	chr19:7728373-7767121	3.20872	0.5	-2.682	0.00085	yes	1.18283	0.193662	-2.61063	1	no	1.05694	4.06427	1.9431	0.00215	yes	0.142714	0.508464	1.83302	1	no	2.682	2.61063	-1.9431	-1.83302	yes	no	yes	no
ENSDARG00000001303	ENSDARG00000001303	psmb8	chr19:7728373-7767121	6.10283	1.2294	-2.31152	5e-05	yes	1.60488	0.162541	-3.30358	1	no	1.43406	7.71248	2.42709	0.0001	yes	0.119812	1.25194	3.38532	1	no	2.31152	3.30358	-2.42709	-3.38532	yes	no	yes	no
ENSDARG00000000656	ENSDARG00000000656	psmb9a	chr19:7728373-7767121	2.42758	0.391048	-2.6341	0.00145	yes	0.846228	0.22553	-1.90773	1	no	0.756159	3.07317	2.02297	0.0042	yes	0.166256	0.398284	1.26039	1	no	2.6341	1.90773	-2.02297	-1.26039	yes	no	yes	no
ENSDARG00000079727	ENSDARG00000079727	sepp1b	chr2:27542967-27549275	67.5325	145.517	1.10754	5e-05	yes	225.911	258.33	0.193462	0.3179	no	201.868	85.4265	-1.24066	5e-05	yes	190.455	148.196	-0.361947	0.06295	no	-1.10754	-0.193462	1.24066	0.361947	yes	no	yes	no
ENSDARG00000093262	ENSDARG00000093262	si:ch211-11p18.6	chr22:9329042-9340815	8.23673	4.0154	-1.03653	5e-05	yes	5.53173	7.09354	0.358776	0.1023	no	4.94308	10.3994	1.07303	5e-05	yes	5.22835	4.09102	-0.353898	0.0971	no	1.03653	-0.358776	-1.07303	0.353898	yes	no	yes	no
ENSDARG00000071216	ENSDARG00000071216	si:ch211-133n4.9	chr19:3863323-3866524	2.09439	6.87027	1.71383	5e-05	yes	0	0.0327578	inf	1	no	0	2.65834	inf	5e-05	yes	0.0241598	6.99367	8.1773	0.08135	no	-1.71383	#VALUE!	#VALUE!	-8.1773	yes	no	no	no
ENSDARG00000095282	ENSDARG00000095282	si:ch211-15o14.2	chr5:45990749-45992586	3.59803	1.47023	-1.29117	0.0001	yes	1.59698	0.540086	-1.56408	1	no	1.427	4.56426	1.67739	5e-05	yes	0.398142	1.49758	1.91127	1	no	1.29117	1.56408	-1.67739	-1.91127	yes	no	yes	no
ENSDARG00000079185	ENSDARG00000079185	si:ch211-163m16.7	chr3:4211432-4212330	3.64476	1.70118	-1.09929	0.001	yes	2.20524	1.82678	-0.271633	1	no	1.97056	4.60735	1.22533	0.0008	yes	1.34675	1.73243	0.363311	1	no	1.09929	0.271633	-1.22533	-0.363311	yes	no	yes	no
ENSDARG00000071355	ENSDARG00000071355	si:ch211-197g15.7	chr22:17700373-17706369	5.07882	2.26819	-1.16295	5e-05	yes	0.630527	0.557212	-0.178333	1	no	0.563414	6.42572	3.51159	5e-05	yes	0.410667	2.31038	2.49209	1	no	1.16295	0.178333	-3.51159	-2.49209	yes	no	yes	no
ENSDARG00000094984	ENSDARG00000094984	si:ch211-197g15.8	chr22:17691677-17698670	2.03488	0.990068	-1.03935	0.0011	yes	1.41241	0.324499	-2.12187	1	no	1.26208	2.57733	1.03007	0.00215	yes	0.239058	1.00894	2.0774	1	no	1.03935	2.12187	-1.03007	-2.0774	yes	no	yes	no
ENSDARG00000093748	ENSDARG00000093748	si:ch211-217k17.11	chr1:52935742-52938042	2.65706	0.6823	-1.96135	5e-05	yes	0.571191	0.0545855	-3.38738	1	no	0.510396	3.36406	2.72051	5e-05	yes	0.0402582	0.695279	4.11024	1	no	1.96135	3.38738	-2.72051	-4.11024	yes	no	yes	no
ENSDARG00000088234	ENSDARG00000088234	si:ch211-217k17.12	chr1:52928509-52931719	6.68253	0.486775	-3.77907	5e-05	yes	2.50558	0.329925	-2.92493	1	no	2.23889	8.46281	1.91835	5e-05	yes	0.243365	0.49524	1.02501	1	no	3.77907	2.92493	-1.91835	-1.02501	yes	no	yes	no
ENSDARG00000092714	ENSDARG00000092714	si:ch211-266a5.12	chr4:12563787-12567073	2.73155	0.716459	-1.93076	5e-05	yes	1.68412	1.03475	-0.702712	1	no	1.50487	3.45437	1.19878	0.00055	yes	0.762852	0.730161	-0.0631896	1	no	1.93076	0.702712	-1.19878	0.0631896	yes	no	yes	no
ENSDARG00000075389	ENSDARG00000075389	si:ch211-281g13.4	chr1:50053443-50064622	2.45398	1.13503	-1.1124	0.0001	yes	0.631387	0.060927	-3.37337	1	no	0.564184	3.1134	2.46425	5e-05	yes	0.0448541	1.15694	4.68893	1	no	1.1124	3.37337	-2.46425	-4.68893	yes	no	yes	no
ENSDARG00000093214	ENSDARG00000093214	si:ch211-284e13.9	chr5:39793909-39797537	4.95855	1.67828	-1.56293	5e-05	yes	0.966512	0.433084	-1.15814	1	no	0.863639	6.28434	2.86326	5e-05	yes	0.319458	1.70902	2.41947	1	no	1.56293	1.15814	-2.86326	-2.41947	yes	no	yes	no
ENSDARG00000096317	ENSDARG00000096317	si:ch73-267f5.2	chr6:9104205-9104791	20.2882	2.5828	-2.97363	5e-05	yes	1.53567	1.08249	-0.504511	1	no	1.37222	25.7332	4.22905	5e-05	yes	0.797956	2.63203	1.7218	1	no	2.97363	0.504511	-4.22905	-1.7218	yes	no	yes	no
ENSDARG00000079703	ENSDARG00000079703	si:dkey-18p12.4	chr9:31421223-31426053	49.0643	26.695	-0.878104	5e-05	yes	45.4433	48.1874	0.0845881	0.6558	no	40.6067	61.9552	0.609505	0.00705	yes	35.5209	27.2165	-0.384185	0.048	no	0.878104	-0.0845881	-0.609505	0.384185	yes	no	no	no
ENSDARG00000096311	ENSDARG00000096311	si:dkey-211g8.8	chr19:11225250-11229222	3.98418	2.06766	-0.946286	0.0002	yes	1.18355	0.289624	-2.03087	1	no	1.05757	5.0415	2.25309	5e-05	yes	0.213303	2.10476	3.30268	1	no	0.946286	2.03087	-2.25309	-3.30268	yes	no	yes	no
ENSDARG00000089602	ENSDARG00000089602	si:dkey-217f16.1	chr3:4236296-4265419	2.264	1.02922	-1.13732	0.00035	yes	1.01776	0.54585	-0.898823	1	no	0.909436	2.86634	1.65616	5e-05	yes	0.402509	1.04755	1.37993	1	no	1.13732	0.898823	-1.65616	-1.37993	yes	no	yes	no
ENSDARG00000093186	ENSDARG00000093186	si:dkey-30j10.5	chr3:16400435-16404262	2.62218	0.214726	-3.6102	5e-05	yes	0.991819	0.28021	-1.82357	1	no	0.886249	3.31835	1.90468	5e-05	yes	0.206713	0.218741	0.0815929	1	no	3.6102	1.82357	-1.90468	-0.0815929	yes	no	yes	no
ENSDARG00000093491	ENSDARG00000093491	si:dkey-78l4.8	chr22:19796468-19800506	3.55202	0.84449	-2.07249	5e-05	yes	1.15449	1.00837	-0.19524	1	no	1.03162	4.48891	2.12146	5e-05	yes	0.743439	0.860764	0.211403	1	no	2.07249	0.19524	-2.12146	-0.211403	yes	no	yes	no
ENSDARG00000095050	ENSDARG00000095050	si:dkey-7f3.14	chr16:26163038-26164138	3.34736	0.543985	-2.62139	5e-05	yes	0.314921	0.104313	-1.59407	1	no	0.28141	4.21337	3.90423	5e-05	yes	0.0768978	0.55493	2.85129	1	no	2.62139	1.59407	-3.90423	-2.85129	yes	no	yes	no
ENSDARG00000087740	ENSDARG00000087740	si:dkeyp-82a1.5	chr8:21568159-21581915	3.82463	1.17916	-1.69756	5e-05	yes	3.18839	2.10074	-0.60193	0.04725	no	2.84903	4.84189	0.765098	0.0072	yes	1.54864	1.20059	-0.367258	1	no	1.69756	0.60193	-0.765098	0.367258	yes	no	no	no
ENSDARG00000029720	ENSDARG00000029720	si:dkeyp-9d4.2	chr1:6893922-6897901	3.40611	1.1559	-1.5591	5e-05	yes	0.507212	0.0618839	-3.03495	1	no	0.453228	4.3179	3.25202	5e-05	yes	0.0456107	1.1775	4.69021	1	no	1.5591	3.03495	-3.25202	-4.69021	yes	no	yes	no
ENSDARG00000071662	ENSDARG00000071662	si:rp71-36a1.3	chr22:5864469-5882153	3.51263	1.39788	-1.32931	5e-05	yes	1.76931	0.750131	-1.23797	1	no	1.581	4.4425	1.49053	5e-05	yes	0.552845	1.42419	1.3652	1	no	1.32931	1.23797	-1.49053	-1.3652	yes	no	yes	no
ENSDARG00000090946	ENSDARG00000090946	si:zfos-364h11.1	chr17:4165141-4182450	2.32263	1.04961	-1.1459	5e-05	yes	0.6913	0.650794	-0.0871129	1	no	0.617726	2.9377	2.24965	5e-05	yes	0.479742	1.06958	1.15672	1	no	1.1459	0.0871129	-2.24965	-1.15672	yes	no	yes	no
ENSDARG00000017365	ENSDARG00000017365	slc23a2	chr8:44981985-45025401	1.02425	2.03843	0.99289	0.0004	yes	2.58469	2.38504	-0.115982	0.67885	no	2.30961	1.29398	-0.835842	0.00595	yes	1.75763	2.07854	0.241936	1	no	-0.99289	0.115982	0.835842	-0.241936	yes	no	yes	no
ENSDARG00000004405	ENSDARG00000004405	snx10a	chr19:20253050-20262318	3.2974	6.23165	0.918283	0.003	yes	8.3903	5.20209	-0.689632	0.0236	no	7.49729	4.16956	-0.846474	0.01205	yes	3.83377	6.35287	0.728646	0.0169	no	-0.918283	0.689632	0.846474	-0.728646	yes	no	yes	no
ENSDARG00000037476	ENSDARG00000037476	sorbs3	chr8:39407719-39491276	11.5014	0.304957	-5.23706	5e-05	yes	1.88948	0.2817	-2.74576	1	no	1.68837	14.6347	3.11569	5e-05	yes	0.207621	0.310313	0.57977	1	no	5.23706	2.74576	-3.11569	-0.57977	yes	no	yes	no
ENSDARG00000052268	ENSDARG00000052268	TRIM35 (29 of 41)	chr3:7195418-7206198	7.22867	1.63769	-2.14207	5e-05	yes	1.06353	0.186809	-2.50923	1	no	0.950348	9.1365	3.26511	5e-05	yes	0.137736	1.66612	3.59651	1	no	2.14207	2.50923	-3.26511	-3.59651	yes	no	yes	no
ENSDARG00000043510	ENSDARG00000043510	vamp4	chr20:14882684-14920060	2.90049	5.74914	0.987051	0.00305	yes	7.955	8.56075	0.105874	0.7377	no	7.10836	3.66187	-0.956936	0.00285	yes	6.30871	5.85912	-0.106662	0.72555	no	-0.987051	-0.105874	0.956936	0.106662	yes	no	yes	no
ENSDARG00000016448	ENSDARG00000016448	vtg3	chr11:7505777-7526742	5.85457	0.243977	-4.58475	5e-05	yes	0.0660934	0.0379067	-0.802051	1	no	0.0590596	7.35539	6.96048	5e-05	yes	0.0279393	0.248455	3.15262	1	no	4.58475	0.802051	-6.96048	-3.15262	yes	no	yes	no
ENSDARG00000092222	ENSDARG00000092222	wu:fb64b08	chr5:40220269-40225640	4.45883	1.20953	-1.88222	5e-05	yes	0.93966	0.0932505	-3.33295	1	no	0.839659	5.65181	2.75084	5e-05	yes	0.0687396	1.23192	4.16363	1	no	1.88222	3.33295	-2.75084	-4.16363	yes	no	yes	no
ENSDARG00000054921	ENSDARG00000054921	wu:fd58b11	chr4:61874513-61880599	3.46896	1.18418	-1.55061	5e-05	yes	2.04169	0.841607	-1.27854	1	no	1.82441	4.37757	1.2627	0.00055	yes	0.620236	1.20613	0.959495	1	no	1.55061	1.27854	-1.2627	-0.959495	yes	no	yes	no
ENSDARG00000020286	ENSDARG00000020286	zgc:123107	chr4:61887202-61893205	2.04267	0.556282	-1.87657	5e-05	yes	1.22692	0.472665	-1.37615	1	no	1.09634	2.57994	1.23464	0.0003	yes	0.348609	0.566606	0.700737	1	no	1.87657	1.37615	-1.23464	-0.700737	yes	no	yes	no
ENSDARG00000056324	ENSDARG00000056324	zgc:123295	chr3:21402826-21411805	3.24748	0.750982	-2.11247	5e-05	yes	2.35518	1.57611	-0.579467	0.11355	no	2.10453	4.09516	0.960423	0.00375	yes	1.16207	0.764279	-0.604524	1	no	2.11247	0.579467	-0.960423	0.604524	yes	no	yes	no
ENSDARG00000077178	ENSDARG00000077178	zgc:152977	chr12:11557751-11591997	3.86092	1.78644	-1.11185	0.00095	yes	2.73591	1.78639	-0.614975	0.1168	no	2.44475	4.8686	0.993823	0.00575	yes	1.31656	1.81927	0.466587	1	no	1.11185	0.614975	-0.993823	-0.466587	yes	no	yes	no
ENSDARG00000079170	ENSDARG00000079170	zgc:162154	chr3:10134570-10156123	2.22863	1.09427	-1.02619	0.00095	yes	0.828393	0.585535	-0.500561	1	no	0.740235	2.82028	1.92978	5e-05	yes	0.431677	1.11387	1.36756	1	no	1.02619	0.500561	-1.92978	-1.36756	yes	no	yes	no
ENSDARG00000014657	ENSDARG00000014657	zgc:171731	chr7:20757857-20762495	2.68591	0.512762	-2.38905	5e-05	yes	1.46846	0.408681	-1.84526	1	no	1.31216	3.4089	1.37736	5e-05	yes	0.301171	0.522126	0.793815	1	no	2.38905	1.84526	-1.37736	-0.793815	yes	no	yes	no
ENSDARG00000076828	ENSDARG00000076828	zgc:194101	chr1:52924472-52925883	4.34034	0.581704	-2.89945	5e-05	yes	1.94187	0.220982	-3.13544	1	no	1.73516	5.49192	1.66224	5e-05	yes	0.163028	0.592769	1.86235	1	no	2.89945	3.13544	-1.66224	-1.86235	yes	no	yes	no
ENSDARG00000070132	ENSDARG00000070132	aste1	chr16:44340112-44350877	12.8651	2.78568	-2.20736	5e-05	yes	12.9755	2.10052	-2.62698	5e-05	yes	11.5944	16.3203	0.493244	0.07105	no	1.54785	2.8284	0.869724	0.0016	yes	2.20736	2.62698	-0.493244	-0.869724	yes	yes	no	yes
ENSDARG00000087832	ENSDARG00000087832	bcl3	chr16:27941793-27978612	7.92961	2.3744	-1.73968	5e-05	yes	7.58129	0.985054	-2.94417	5e-05	yes	6.77448	10.0222	0.56502	0.0216	no	0.725976	2.42085	1.73752	5e-05	yes	1.73968	2.94417	-0.56502	-1.73752	yes	yes	no	yes
ENSDARG00000068180	ENSDARG00000068180	bmp16	chr18:47547057-47547387	17.4909	37.5002	1.10029	5e-05	yes	16.6808	31.2647	0.906348	0.00445	yes	14.9055	22.0838	0.567146	0.0701	no	23.0441	38.2267	0.730181	0.00585	yes	-1.10029	-0.906348	-0.567146	-0.730181	yes	yes	no	no
ENSDARG00000090889	ENSDARG00000090889	BX005069.4	chr14:38211335-38214588	27.6916	9.99703	-1.46987	5e-05	yes	27.2873	4.45007	-2.61633	5e-05	yes	24.3832	35.0317	0.52277	0.03255	no	3.28107	10.1766	1.63302	5e-05	yes	1.46987	2.61633	-0.52277	-1.63302	yes	yes	no	yes
ENSDARG00000074250	ENSDARG00000074250	CABZ01085697.1	chr4:3168179-3169395	11.2268	0.769676	-3.86655	5e-05	yes	21.2874	9.49569	-1.16466	0.00115	yes	19.0217	14.128	-0.429091	0.1995	no	6.99862	0.78429	-3.15761	5e-05	yes	3.86655	1.16466	0.429091	3.15761	yes	yes	no	yes
ENSDARG00000077620	ENSDARG00000077620	cdca7a	chr9:2878270-2890758	7.03223	2.77509	-1.34145	5e-05	yes	11.5759	6.18385	-0.904541	0.0003	yes	10.3438	8.88698	-0.218995	0.3711	no	4.55943	2.82895	-0.688585	0.0096	yes	1.34145	0.904541	0.218995	0.688585	yes	yes	no	no
ENSDARG00000062152	ENSDARG00000062152	chaf1a	chr22:22639668-22665315	5.53588	2.60898	-1.08532	5e-05	yes	11.5712	7.72806	-0.582359	0.0043	yes	10.3397	7.00558	-0.561615	0.0183	no	5.69565	2.65795	-1.09955	5e-05	yes	1.08532	0.582359	0.561615	1.09955	yes	no	no	yes
ENSDARG00000054610	ENSDARG00000054610	coro1a	chr3:31077482-31092481	16.5473	6.48156	-1.35218	5e-05	yes	20.0302	5.00168	-2.00169	5e-05	yes	17.8985	20.903	0.223875	0.3267	no	3.68721	6.59839	0.839585	0.0003	yes	1.35218	2.00169	-0.223875	-0.839585	yes	yes	no	yes
ENSDARG00000012388	ENSDARG00000012388	CU855779.1	chr24:29154126-29165706	95.5714	39.2064	-1.28549	5e-05	yes	145.155	84.1101	-0.787248	5e-05	yes	129.707	120.353	-0.107984	0.64865	no	61.9988	39.9723	-0.633242	0.00165	yes	1.28549	0.787248	0.107984	0.633242	yes	no	no	no
ENSDARG00000016713	ENSDARG00000016713	dhrs13l1	chr14:4632106-4642537	11.0925	21.0712	0.925685	5e-05	yes	16.5091	48.5244	1.55544	5e-05	yes	14.7518	13.9757	-0.0779717	0.7549	no	35.7737	21.4821	-0.735766	0.00015	yes	-0.925685	-1.55544	0.0779717	0.735766	yes	yes	no	no
ENSDARG00000086768	ENSDARG00000086768	dut	chr18:4729029-4735630	12.4965	4.02479	-1.63454	5e-05	yes	23.1309	11.05	-1.06578	5e-05	yes	20.669	15.7992	-0.38762	0.1206	no	8.14509	4.09826	-0.990918	0.00035	yes	1.63454	1.06578	0.38762	0.990918	yes	yes	no	yes
ENSDARG00000077982	ENSDARG00000077982	elf3	chr22:636673-640308	42.2231	13.4755	-1.6477	5e-05	yes	75.7222	33.2384	-1.18786	5e-05	yes	67.6633	53.4651	-0.339775	0.18065	no	24.4978	13.7285	-0.835484	0.0001	yes	1.6477	1.18786	0.339775	0.835484	yes	yes	no	yes
ENSDARG00000028396	ENSDARG00000028396	fkbp5	chr6:41026921-41046917	22.7787	11.3046	-1.01077	5e-05	yes	27.4169	49.8725	0.863177	5e-05	yes	24.4993	28.713	0.22896	0.34585	no	36.7585	11.5328	-1.67234	5e-05	yes	1.01077	-0.863177	-0.22896	1.67234	yes	yes	no	yes
ENSDARG00000053479	ENSDARG00000053479	gdf6a	chr16:41792074-41798152	16.1407	6.30698	-1.35568	5e-05	yes	31.1574	19.6468	-0.665281	0.00065	yes	27.8415	20.399	-0.448739	0.04885	no	14.4774	6.42218	-1.17267	5e-05	yes	1.35568	0.665281	0.448739	1.17267	yes	no	no	yes
ENSDARG00000022183	ENSDARG00000022183	gsto1	chr13:25604321-25612941	29.6022	60.2997	1.02645	5e-05	yes	32.1525	137.973	2.10138	5e-05	yes	28.7305	37.3613	0.378965	0.09445	no	101.693	61.4495	-0.726753	5e-05	yes	-1.02645	-2.10138	-0.378965	0.726753	yes	yes	no	no
ENSDARG00000062788	ENSDARG00000062788	irg1l	chr14:11625680-11629239	81.1482	10.4586	-2.95587	5e-05	yes	175.571	28.2817	-2.63411	5e-05	yes	156.886	102.566	-0.613174	0.0259	no	20.8504	10.676	-0.965702	0.0002	yes	2.95587	2.63411	0.613174	0.965702	yes	yes	no	yes
ENSDARG00000019507	ENSDARG00000019507	mcm5	chr3:27023666-27035630	8.36898	4.02966	-1.05439	5e-05	yes	14.4257	8.62518	-0.742015	0.0003	yes	12.8904	10.5654	-0.286943	0.2102	no	6.35833	4.10838	-0.63008	0.00285	yes	1.05439	0.742015	0.286943	0.63008	yes	no	no	no
ENSDARG00000055290	ENSDARG00000055290	mpeg1	chr8:30558151-30561663	10.0294	4.66448	-1.10445	5e-05	yes	14.2596	3.93976	-1.85576	5e-05	yes	12.7421	12.665	-0.00875011	0.97195	no	2.90439	4.75059	0.709872	0.00495	yes	1.10445	1.85576	0.00875011	-0.709872	yes	yes	no	no
ENSDARG00000019521	ENSDARG00000019521	mpx	chr10:6807369-6814445	53.2498	1.26299	-5.39786	5e-05	yes	114.758	3.14834	-5.18785	5e-05	yes	102.546	67.2275	-0.609147	0.0222	no	2.32108	1.28646	-0.851385	0.00105	yes	5.39786	5.18785	0.609147	0.851385	yes	yes	no	yes
ENSDARG00000056108	ENSDARG00000056108	ndufa4	chr12:10855555-10859059	194.119	59.4046	-1.7083	5e-05	yes	295.797	162.909	-0.860543	5e-05	yes	264.315	244.35	-0.113313	0.66995	no	120.048	60.5996	-0.986225	5e-05	yes	1.7083	0.860543	0.113313	0.986225	yes	yes	no	yes
ENSDARG00000052960	ENSDARG00000052960	nppa	chr8:50771783-50776485	5.17133	1.79861	-1.52365	5e-05	yes	9.60707	6.17611	-0.637399	0.0103	yes	8.5845	6.53398	-0.393772	0.1149	no	4.55643	1.83588	-1.31143	0.00015	yes	1.52365	0.637399	0.393772	1.31143	yes	no	no	yes
ENSDARG00000063333	ENSDARG00000063333	nup210	chr23:4534691-4607713	5.94311	2.76439	-1.10425	5e-05	yes	9.66465	6.71166	-0.52605	0.0069	yes	8.63606	7.49799	-0.20387	0.37105	no	4.947	2.81685	-0.812472	5e-05	yes	1.10425	0.52605	0.20387	0.812472	yes	no	no	yes
ENSDARG00000054155	ENSDARG00000054155	pcna	chr10:42187908-42192762	39.233	16.985	-1.20781	5e-05	yes	69.2177	36.76	-0.913004	5e-05	yes	61.8508	49.6273	-0.317659	0.1696	no	27.0963	17.3026	-0.647105	0.00095	yes	1.20781	0.913004	0.317659	0.647105	yes	yes	no	no
ENSDARG00000042874	ENSDARG00000042874	phlda2	chr25:24248136-24249419	86.4649	36.4393	-1.24662	5e-05	yes	171.585	89.7602	-0.934773	5e-05	yes	153.324	109.256	-0.488869	0.03825	no	66.1478	37.1305	-0.83309	5e-05	yes	1.24662	0.934773	0.488869	0.83309	yes	yes	no	yes
ENSDARG00000017549	ENSDARG00000017549	phyh	chr4:7007616-7015474	9.83907	29.6497	1.59142	5e-05	yes	16.9058	61.5712	1.86474	5e-05	yes	15.1065	12.4099	-0.28368	0.2327	no	45.3886	30.2381	-0.585962	0.00625	yes	-1.59142	-1.86474	0.28368	0.585962	yes	yes	no	no
ENSDARG00000094438	ENSDARG00000094438	plac8.2	chr10:11337856-11342387	88.0535	2.11686	-5.37839	5e-05	yes	103.423	5.59993	-4.207	5e-05	yes	92.4168	111.095	0.265568	0.2554	no	4.12689	2.1556	-0.936965	0.0027	yes	5.37839	4.207	-0.265568	0.936965	yes	yes	no	yes
ENSDARG00000027689	ENSDARG00000027689	pold1	chr3:16307810-16339225	3.16758	1.60208	-0.98343	5e-05	yes	5.38936	3.41571	-0.657928	0.00305	yes	4.81577	4.00508	-0.265934	0.2637	no	2.51765	1.63206	-0.625381	0.00585	yes	0.98343	0.657928	0.265934	0.625381	yes	no	no	no
ENSDARG00000040163	ENSDARG00000040163	prim1	chr23:18009904-18019625	3.63494	1.35757	-1.42091	5e-05	yes	5.23511	3.27954	-0.674725	0.0123	yes	4.67792	4.60011	-0.0241992	0.92835	no	2.41804	1.38327	-0.805755	0.00655	yes	1.42091	0.674725	0.0241992	0.805755	yes	no	no	no
ENSDARG00000010487	ENSDARG00000010487	sae1	chr15:23076167-23092652	4.43678	1.92582	-1.20404	5e-05	yes	8.79202	5.03748	-0.803492	0.00115	yes	7.85631	5.59812	-0.488909	0.05405	no	3.71309	1.962	-0.9203	0.00075	yes	1.20404	0.803492	0.488909	0.9203	yes	no	no	yes
ENSDARG00000058206	ENSDARG00000058206	sb:cb252	chr14:11656672-11659628	359.396	28.671	-3.64791	5e-05	yes	629.22	73.9942	-3.08808	5e-05	yes	562.255	453.249	-0.310922	0.2277	no	54.5343	29.2348	-0.899474	5e-05	yes	3.64791	3.08808	0.310922	0.899474	yes	yes	no	yes
ENSDARG00000088549	ENSDARG00000088549	si:ch73-25i22.2	chr18:5109403-5124138	1.15962	3.70931	1.67749	5e-05	yes	0.647217	8.41179	3.70009	5e-05	yes	0.578339	1.46442	1.34035	1	no	6.19935	3.78213	-0.712916	0.0013	yes	-1.67749	-3.70009	-1.34035	0.712916	yes	yes	no	no
ENSDARG00000004926	ENSDARG00000004926	slbp	chr14:18741668-18746150	5.54872	1.77519	-1.64418	5e-05	yes	8.20878	4.56499	-0.846556	0.0019	yes	7.33511	7.01935	-0.0634817	0.80525	no	3.36427	1.80835	-0.895622	0.00285	yes	1.64418	0.846556	0.0634817	0.895622	yes	yes	no	yes
ENSDARG00000001354	ENSDARG00000001354	slc6a13l	chr6:41075066-41091883	7.36158	12.9079	0.810161	0.0002	yes	6.89761	10.4266	0.596095	0.00575	yes	6.16349	9.31512	0.595825	0.0133	no	7.68569	13.1404	0.773759	5e-05	yes	-0.810161	-0.596095	-0.595825	-0.773759	yes	no	no	no
ENSDARG00000025428	ENSDARG00000025428	socs3a	chr3:58237024-58239849	44.6801	6.86836	-2.7016	5e-05	yes	85.3268	22.6343	-1.91448	5e-05	yes	76.2459	56.5288	-0.431674	0.0713	no	16.6767	6.99835	-1.25274	5e-05	yes	2.7016	1.91448	0.431674	1.25274	yes	yes	no	yes
ENSDARG00000035459	ENSDARG00000035459	spns3	chr5:32598775-32617398	3.09922	1.34422	-1.20513	5e-05	yes	5.18801	3.12406	-0.731758	0.0034	yes	4.63586	3.91049	-0.245489	0.3401	no	2.30315	1.36894	-0.750546	0.0077	yes	1.20513	0.731758	0.245489	0.750546	yes	no	no	no
ENSDARG00000091111	ENSDARG00000091111	TIFA	chr7:23956439-23957021	133.674	50.5268	-1.4036	5e-05	yes	226.289	144.32	-0.648894	0.0012	yes	202.206	168.846	-0.260118	0.26305	no	106.351	51.4959	-1.0463	5e-05	yes	1.4036	0.648894	0.260118	1.0463	yes	no	no	yes
ENSDARG00000091209	ENSDARG00000091209	ucp3	chr10:37894302-37900774	5.09641	9.94434	0.964393	0.0001	yes	7.57033	26.5949	1.81272	5e-05	yes	6.76465	6.42699	-0.0738706	0.7706	no	19.6024	10.142	-0.950683	5e-05	yes	-0.964393	-1.81272	0.0738706	0.950683	yes	yes	no	yes
ENSDARG00000053554	ENSDARG00000053554	wdr76	chr7:31538203-31546297	1.33807	3.22131	1.26749	5e-05	yes	1.25204	10.6934	3.09437	5e-05	yes	1.11879	1.68886	0.594105	1	no	7.88176	3.28717	-1.26167	5e-05	yes	-1.26749	-3.09437	-0.594105	1.26167	yes	yes	no	yes
ENSDARG00000055066	ENSDARG00000055066	ZDHHC20 (1 of 2)	chr10:36577656-36603524	3.25771	1.65156	-0.980033	0.0002	yes	6.78467	3.81562	-0.83036	0.00105	yes	6.0626	4.11566	-0.558813	0.02975	no	2.81214	1.68228	-0.741247	0.0065	yes	0.980033	0.83036	0.558813	0.741247	yes	yes	no	no
ENSDARG00000003257	ENSDARG00000003257	zgc:101559	chr9:17945387-17950375	2.14928	3.78387	0.816009	0.0003	yes	1.94439	3.47398	0.837274	0.0009	yes	1.73745	2.71206	0.642416	0.0167	no	2.56046	3.85822	0.591533	0.00805	yes	-0.816009	-0.837274	-0.642416	-0.591533	yes	yes	no	no
ENSDARG00000038196	ENSDARG00000038196	zgc:112146	chr3:50233907-50239497	40.0846	71.0062	0.824895	5e-05	yes	39.7857	200.59	2.33393	5e-05	yes	35.5509	50.6057	0.509414	0.031	no	147.857	72.3757	-1.03063	5e-05	yes	-0.824895	-2.33393	-0.509414	1.03063	yes	yes	no	yes
ENSDARG00000025122	ENSDARG00000025122	abhd4	chr2:51748980-51760936	34.3905	66.2144	0.945134	5e-05	yes	43.0577	117.164	1.44418	5e-05	yes	38.4753	43.3868	0.173324	0.45705	no	86.3514	67.4986	-0.355362	0.06365	no	-0.945134	-1.44418	-0.173324	0.355362	yes	yes	no	no
ENSDARG00000038900	ENSDARG00000038900	acadm	chr2:26618239-26624320	177.03	318.685	0.848135	0.00055	yes	172.505	460.976	1.41805	5e-05	yes	154.145	223.565	0.536406	0.0454	no	339.751	324.734	-0.0652195	0.7563	no	-0.848135	-1.41805	-0.536406	0.0652195	yes	yes	no	no
ENSDARG00000018478	ENSDARG00000018478	agxtb	chr2:22117430-22146295	279.439	514.194	0.879777	0.0006	yes	314.77	514.862	0.709887	0.0006	yes	281.271	353.641	0.330328	0.23725	no	379.572	523.457	0.463696	0.026	no	-0.879777	-0.709887	-0.330328	-0.463696	yes	no	no	no
ENSDARG00000075435	ENSDARG00000075435	akap11	chr9:18495541-18522848	3.17354	7.01046	1.14342	0.00315	yes	3.88556	9.3732	1.27042	0.00035	yes	3.47203	4.01467	0.209502	0.54785	no	6.90809	7.14373	0.048391	0.8696	no	-1.14342	-1.27042	-0.209502	-0.048391	yes	yes	no	no
ENSDARG00000014969	ENSDARG00000014969	ankhb	chr2:31675428-31724187	3.43002	6.35535	0.889752	5e-05	yes	5.08064	7.84085	0.625999	0.0035	yes	4.53993	4.33715	-0.0659216	0.78515	no	5.77901	6.47334	0.163687	0.42925	no	-0.889752	-0.625999	0.0659216	-0.163687	yes	no	no	no
ENSDARG00000027063	ENSDARG00000027063	arpc1b	chr3:40803792-40815394	18.1839	9.11383	-0.996532	5e-05	yes	30.3391	9.33548	-1.70038	5e-05	yes	27.1102	22.9596	-0.23974	0.28945	no	6.88129	9.28163	0.431699	0.04045	no	0.996532	1.70038	0.23974	-0.431699	yes	yes	no	no
ENSDARG00000079839	ENSDARG00000079839	arrdc1b	chr21:12898748-12965041	5.58087	2.74813	-1.02204	5e-05	yes	10.546	4.90512	-1.10434	5e-05	yes	9.42368	7.05213	-0.418231	0.0685	no	3.61505	2.80055	-0.368304	0.07475	no	1.02204	1.10434	0.418231	0.368304	yes	yes	no	no
ENSDARG00000007823	ENSDARG00000007823	atf3	chr20:37819240-37825345	25.0742	13.337	-0.910772	0.00035	yes	40.5789	15.2318	-1.41364	5e-05	yes	36.2604	31.7375	-0.192208	0.4394	no	11.2261	13.5872	0.2754	0.19965	no	0.910772	1.41364	0.192208	-0.2754	yes	yes	no	no
ENSDARG00000042577	ENSDARG00000042577	batf3	chr20:37837306-37838275	2.83836	0.806628	-1.81508	0.00015	yes	7.07797	2.50118	-1.50073	0.0004	yes	6.32475	3.60047	-0.812823	0.03	no	1.84328	0.820933	-1.16694	1	no	1.81508	1.50073	0.812823	1.16694	yes	yes	no	no
ENSDARG00000025468	ENSDARG00000025468	bnip3la	chr8:5419810-5437358	14.212	25.0974	0.820429	0.00015	yes	13.134	26.9783	1.03849	5e-05	yes	11.7361	17.958	0.613671	0.01395	no	19.883	25.5824	0.363613	0.07825	no	-0.820429	-1.03849	-0.613671	-0.363613	yes	yes	no	no
ENSDARG00000086789	ENSDARG00000086789	BX649281.3	chr17:31336029-31357512	5.99382	11.037	0.880805	5e-05	yes	6.96159	16.8733	1.27726	5e-05	yes	6.22069	7.56346	0.281971	0.2145	no	12.4353	11.2555	-0.143806	0.4526	no	-0.880805	-1.27726	-0.281971	0.143806	yes	yes	no	no
ENSDARG00000071211	ENSDARG00000071211	C11H1orf50	chr11:40340777-40345898	66.0074	149.223	1.17677	5e-05	yes	64.4009	217.552	1.75621	5e-05	yes	57.5469	83.2838	0.533298	0.02	no	160.362	152.138	-0.0759469	0.6937	no	-1.17677	-1.75621	-0.533298	0.0759469	yes	yes	no	no
ENSDARG00000041560	ENSDARG00000041560	C18H16orf70	chr18:17153026-17166178	5.92961	11.1086	0.905663	5e-05	yes	9.44905	16.0256	0.762138	0.0008	yes	8.4434	7.4925	-0.172376	0.489	no	11.8115	11.3197	-0.061356	0.7654	no	-0.905663	-0.762138	0.172376	0.061356	yes	no	no	no
ENSDARG00000076858	ENSDARG00000076858	C5H8orf4 (2 of 2)	chr10:20290435-20290756	7.71187	2.28234	-1.75657	0.0002	yes	10.8985	3.08508	-1.82075	0.0004	yes	9.73859	9.75712	0.00274343	0.9957	no	2.27355	2.32749	0.0338275	1	no	1.75657	1.82075	-0.00274343	-0.0338275	yes	yes	no	no
ENSDARG00000002259	ENSDARG00000002259	ca15c	chr12:5019012-5026800	2.7133	0.820294	-1.72583	5e-05	yes	4.09698	1.68207	-1.28432	0.00085	yes	3.66101	3.43749	-0.0908853	0.7779	no	1.24072	0.835295	-0.570824	1	no	1.72583	1.28432	0.0908853	0.570824	yes	yes	no	no
ENSDARG00000070622	ENSDARG00000070622	CABZ01064972.1	Zv9_NA735:71525-72362	5.61725	1.41688	-1.98715	5e-05	yes	11.7009	2.19937	-2.41146	5e-05	yes	10.4555	7.10198	-0.557972	0.0421	no	1.62207	1.44207	-0.1697	1	no	1.98715	2.41146	0.557972	0.1697	yes	yes	no	no
ENSDARG00000034063	ENSDARG00000034063	CABZ01068208.1	chr17:53861668-53868596	5.60383	2.26301	-1.30817	5e-05	yes	5.91591	1.68112	-1.81517	5e-05	yes	5.2863	7.08446	0.422401	0.0849	no	1.23919	2.3033	0.894301	1	no	1.30817	1.81517	-0.422401	-0.894301	yes	yes	no	no
ENSDARG00000013312	ENSDARG00000013312	cadps2	chr25:28804288-29136657	7.85684	14.16	0.849804	0.0009	yes	9.50404	17.2049	0.856208	0.00065	yes	8.49248	9.92729	0.225215	0.44195	no	12.6811	14.4303	0.186417	0.44135	no	-0.849804	-0.856208	-0.225215	-0.186417	yes	yes	no	no
ENSDARG00000011166	ENSDARG00000011166	cahz	chr2:29192214-29200240	5.09045	1.58559	-1.68277	5e-05	yes	9.61602	3.24161	-1.56873	5e-05	yes	8.59263	6.40741	-0.423358	0.10045	no	2.38988	1.61501	-0.5654	0.0375	no	1.68277	1.56873	0.423358	0.5654	yes	yes	no	no
ENSDARG00000078546	ENSDARG00000078546	cars2	chr1:28114603-28133331	2.60134	1.47506	-0.818484	0.00305	yes	3.89204	2.28404	-0.768938	0.0036	yes	3.47785	3.28647	-0.0816573	0.76845	no	1.68338	1.50181	-0.164664	1	no	0.818484	0.768938	0.0816573	0.164664	yes	no	no	no
ENSDARG00000058325	ENSDARG00000058325	casp8	chr6:12957804-12968646	10.9339	6.15464	-0.829062	0.00015	yes	19.5973	9.72688	-1.01061	5e-05	yes	17.5117	13.8319	-0.340314	0.14655	no	7.16861	6.268	-0.193689	0.3536	no	0.829062	1.01061	0.340314	0.193689	yes	yes	no	no
ENSDARG00000095040	ENSDARG00000095040	cbln7	chr2:39253571-39262839	6.54576	0.807893	-3.01832	5e-05	yes	13.5862	0.724177	-4.22965	5e-05	yes	12.1404	8.2586	-0.555853	0.04095	no	0.533516	0.821465	0.622668	1	no	3.01832	4.22965	0.555853	-0.622668	yes	yes	no	no
ENSDARG00000087863	ENSDARG00000087863	CD44 (2 of 2)	chr7:51339737-51349848	14.5947	8.09741	-0.849913	5e-05	yes	28.1142	15.9296	-0.819586	5e-05	yes	25.1221	18.431	-0.44682	0.0511	no	11.742	8.24911	-0.509371	0.0135	no	0.849913	0.819586	0.44682	0.509371	yes	yes	no	no
ENSDARG00000068233	ENSDARG00000068233	CD53	chr5:28514128-28523870	4.7454	2.52227	-0.911804	0.00025	yes	8.18461	2.34155	-1.80545	5e-05	yes	7.31362	5.99549	-0.286708	0.2617	no	1.72584	2.56926	0.574054	0.0477	no	0.911804	1.80545	0.286708	-0.574054	yes	yes	no	no
ENSDARG00000026577	ENSDARG00000026577	cdk2	chr11:3281631-3288790	2.86312	1.29242	-1.14751	0.0001	yes	5.27402	2.64769	-0.994167	0.0003	yes	4.7127	3.61943	-0.380792	0.152	no	1.95165	1.31748	-0.566911	1	no	1.14751	0.994167	0.380792	0.566911	yes	yes	no	no
ENSDARG00000092945	ENSDARG00000092945	CEP250	chr19:39058534-39068507	2.8833	1.35221	-1.09241	5e-05	yes	3.00194	1.42839	-1.0715	5e-05	yes	2.68247	3.63498	0.438387	0.0808	no	1.05287	1.37687	0.387061	1	no	1.09241	1.0715	-0.438387	-0.387061	yes	yes	no	no
ENSDARG00000045190	ENSDARG00000045190	ch25h	chr12:18109708-18110818	3.79718	1.22248	-1.63512	5e-05	yes	6.28395	0.459078	-3.77486	5e-05	yes	5.61516	4.80666	-0.224291	0.4184	no	0.33844	1.24503	1.8792	1	no	1.63512	3.77486	0.224291	-1.8792	yes	yes	no	no
ENSDARG00000008541	ENSDARG00000008541	chia.4	chr23:18096996-18164381	43.0394	6.90825	-2.63927	5e-05	yes	45.6827	15.7713	-1.53434	5e-05	yes	40.821	54.2519	0.410361	0.20135	no	11.624	7.03666	-0.724143	0.0357	no	2.63927	1.53434	-0.410361	0.724143	yes	yes	no	no
ENSDARG00000059651	ENSDARG00000059651	CIDEC	chr6:22886995-22896421	12.0485	27.5113	1.19117	5e-05	yes	16.6138	38.3773	1.20787	5e-05	yes	14.8457	15.1937	0.0334222	0.88965	no	28.2831	28.0601	-0.011424	0.9547	no	-1.19117	-1.20787	-0.0334222	0.011424	yes	yes	no	no
ENSDARG00000062025	ENSDARG00000062025	cpox	chr8:19121104-19137938	20.1544	7.76928	-1.37525	5e-05	yes	34.8943	9.72064	-1.84387	5e-05	yes	31.1807	25.394	-0.296168	0.20495	no	7.16403	7.92003	0.144734	0.5108	no	1.37525	1.84387	0.296168	-0.144734	yes	yes	no	no
ENSDARG00000058285	ENSDARG00000058285	cpt1b	chr18:7811522-7832169	3.85992	10.8359	1.48918	5e-05	yes	6.67836	20.3089	1.60455	5e-05	yes	5.96769	4.87029	-0.293166	0.2174	no	14.9697	11.0427	-0.438957	0.02165	no	-1.48918	-1.60455	0.293166	0.438957	yes	yes	no	no
ENSDARG00000044212	ENSDARG00000044212	CR385063.1	chr19:39080157-39108102	2.44182	1.19112	-1.03564	5e-05	yes	2.55823	1.19941	-1.09282	5e-05	yes	2.28599	3.0792	0.429735	0.0725	no	0.884206	1.2131	0.456247	1	no	1.03564	1.09282	-0.429735	-0.456247	yes	yes	no	no
ENSDARG00000029071	ENSDARG00000029071	creld2	chr4:26378362-26395676	13.4815	5.79174	-1.21892	5e-05	yes	13.7066	6.21931	-1.14005	5e-05	yes	12.2479	16.9829	0.471558	0.094	no	4.58457	5.8994	0.363783	0.1755	no	1.21892	1.14005	-0.471558	-0.363783	yes	yes	no	no
ENSDARG00000024831	ENSDARG00000024831	crhbp	chr21:7096610-7105816	2.36912	1.04055	-1.18701	0.0002	yes	4.74687	1.80341	-1.39625	5e-05	yes	4.24172	2.98549	-0.506682	0.07965	no	1.32896	1.05993	-0.326323	1	no	1.18701	1.39625	0.506682	0.326323	yes	yes	no	no
ENSDARG00000007889	ENSDARG00000007889	csf1ra	chr15:43673436-43704576	4.69006	2.63563	-0.83146	0.0001	yes	8.27871	2.46446	-1.74813	5e-05	yes	7.39769	5.91872	-0.321792	0.1694	no	1.8161	2.68507	0.564117	0.0135	no	0.83146	1.74813	0.321792	-0.564117	yes	yes	no	no
ENSDARG00000013771	ENSDARG00000013771	ctssb.2	chr16:31774763-31790653	19.2739	6.70169	-1.52405	0.00085	yes	24.241	11.6397	-1.0584	0.0027	yes	21.6611	24.3677	0.169869	0.58335	no	8.58048	6.82186	-0.330893	0.435	no	1.52405	1.0584	-0.169869	0.330893	yes	yes	no	no
ENSDARG00000091177	ENSDARG00000091177	CU633981.2	chr2:47419288-47422014	93.7762	21.6778	-2.113	5e-05	yes	106.47	39.7786	-1.42039	5e-05	yes	95.1407	118.237	0.313543	0.19455	no	29.3177	22.0969	-0.407926	0.0663	no	2.113	1.42039	-0.313543	0.407926	yes	yes	no	no
ENSDARG00000041041	ENSDARG00000041041	cxcr3.2	chr16:13568132-13575310	2.85977	1.24965	-1.19438	5e-05	yes	5.00774	1.33708	-1.90507	5e-05	yes	4.47481	3.61038	-0.309673	0.2333	no	0.985704	1.27346	0.369531	1	no	1.19438	1.90507	0.309673	-0.369531	yes	yes	no	no
ENSDARG00000056615	ENSDARG00000056615	cybb	chr11:30671994-30695011	5.46821	1.21259	-2.17297	5e-05	yes	12.8595	1.74701	-2.87987	5e-05	yes	11.491	6.90366	-0.735074	0.04605	no	1.28779	1.23545	-0.0598677	1	no	2.17297	2.87987	0.735074	0.0598677	yes	yes	no	no
ENSDARG00000040431	ENSDARG00000040431	cyp2k8	chr3:12464717-12482638	4.68334	10.1217	1.11183	5e-05	yes	5.64163	10.2692	0.864135	0.00025	yes	5.04122	5.9111	0.229654	0.3489	no	7.56847	10.3187	0.447192	0.02915	no	-1.11183	-0.864135	-0.229654	-0.447192	yes	yes	no	no
ENSDARG00000024090	ENSDARG00000024090	dnajc4	chr14:8445648-8467311	7.83391	16.0537	1.0351	5e-05	yes	7.38688	21.337	1.53032	5e-05	yes	6.60064	9.90607	0.585707	0.0304	no	15.7246	16.3572	0.0569043	0.8074	no	-1.0351	-1.53032	-0.585707	-0.0569043	yes	yes	no	no
ENSDARG00000030756	ENSDARG00000030756	dnmt1	chr3:55442889-55458859	6.08831	2.83244	-1.104	5e-05	yes	7.09091	4.93856	-0.521879	0.00935	yes	6.33621	7.70087	0.281402	0.23805	no	3.64044	2.88692	-0.33458	0.10795	no	1.104	0.521879	-0.281402	0.33458	yes	no	no	no
ENSDARG00000052402	ENSDARG00000052402	dnmt3b	chr8:24209206-24234142	2.64045	1.41573	-0.899236	0.00015	yes	4.17245	2.58795	-0.689082	0.00125	yes	3.72837	3.3372	-0.159908	0.4851	no	1.90757	1.44186	-0.403807	1	no	0.899236	0.689082	0.159908	0.403807	yes	no	no	no
ENSDARG00000045561	ENSDARG00000045561	dram1	chr4:16730596-16738065	14.0672	4.34297	-1.69558	5e-05	yes	20.8809	3.94498	-2.40409	5e-05	yes	18.6586	17.7852	-0.0691671	0.76875	no	2.90676	4.42283	0.60556	0.0301	no	1.69558	2.40409	0.0691671	-0.60556	yes	yes	no	no
ENSDARG00000019307	ENSDARG00000019307	dusp5	chr22:32601000-32612547	4.30801	2.28017	-0.917879	0.0004	yes	8.22376	2.89314	-1.50716	5e-05	yes	7.34857	5.44286	-0.433099	0.08805	no	2.13267	2.32397	0.123935	1	no	0.917879	1.50716	0.433099	-0.123935	yes	yes	no	no
ENSDARG00000016607	ENSDARG00000016607	echdc2	chr20:16245543-16263709	16.9207	6.95976	-1.28168	5e-05	yes	25.8783	10.3431	-1.32307	5e-05	yes	23.1242	21.3602	-0.114478	0.6225	no	7.62396	7.09217	-0.104314	0.6435	no	1.28168	1.32307	0.114478	0.104314	yes	yes	no	no
ENSDARG00000074255	ENSDARG00000074255	EFHA2 (2 of 2)	chr14:31329156-31360011	2.79531	5.24747	0.908616	0.00055	yes	3.12721	9.50264	1.60345	5e-05	yes	2.79437	3.53747	0.340193	0.24315	no	7.00266	5.34891	-0.388659	0.09105	no	-0.908616	-1.60345	-0.340193	0.388659	yes	yes	no	no
ENSDARG00000007477	ENSDARG00000007477	fbxo8	chr1:38754026-38770862	8.12204	15.2335	0.907338	5e-05	yes	8.20551	16.3253	0.992446	5e-05	yes	7.3322	10.2774	0.487154	0.04865	no	12.0317	15.5288	0.368111	0.07575	no	-0.907338	-0.992446	-0.487154	-0.368111	yes	yes	no	no
ENSDARG00000011404	ENSDARG00000011404	fen1	chr24:11681061-11691834	6.7179	2.81962	-1.25251	5e-05	yes	10.3453	5.82011	-0.82986	0.00055	yes	9.24425	8.49364	-0.122173	0.61425	no	4.29089	2.87201	-0.579215	0.02465	no	1.25251	0.82986	0.122173	0.579215	yes	yes	no	no
ENSDARG00000030896	ENSDARG00000030896	foxq1a	chr2:902564-903497	8.28884	4.22267	-0.973016	0.00045	yes	13.1957	6.9039	-0.934582	0.00035	yes	11.7912	10.467	-0.171864	0.5108	no	5.0899	4.29508	-0.244952	0.36635	no	0.973016	0.934582	0.171864	0.244952	yes	yes	no	no
ENSDARG00000087706	ENSDARG00000087706	FP015862.3	chr16:23993664-23995005	5.66335	2.5706	-1.13955	0.0027	yes	10.4515	1.34766	-2.95519	0.0001	yes	9.33944	7.14909	-0.385576	0.29045	no	0.993932	2.61717	1.39679	1	no	1.13955	2.95519	0.385576	-1.39679	yes	yes	no	no
ENSDARG00000038668	ENSDARG00000038668	gbp1	chr2:42122032-42136425	5.92428	1.82618	-1.69781	5e-05	yes	7.29795	1.28061	-2.51066	5e-05	yes	6.52122	7.49629	0.201035	0.48095	no	0.943817	1.85952	0.978355	1	no	1.69781	2.51066	-0.201035	-0.978355	yes	yes	no	no
ENSDARG00000023526	ENSDARG00000023526	ggt1a	chr8:41995277-42028629	2.05651	0.722382	-1.50936	5e-05	yes	2.2516	1.03375	-1.12306	0.00095	yes	2.01197	2.60326	0.371715	0.197	no	0.76245	0.734501	-0.053878	1	no	1.50936	1.12306	-0.371715	0.053878	yes	yes	no	no
ENSDARG00000043180	ENSDARG00000043180	gpd1b	chr22:6942862-6953800	32.9598	58.3136	0.823127	5e-05	yes	47.7007	77.1334	0.693346	0.0002	yes	42.6243	41.6166	-0.0345154	0.8758	no	56.8629	59.4102	0.0632241	0.73735	no	-0.823127	-0.693346	0.0345154	-0.0632241	yes	no	no	no
ENSDARG00000006207	ENSDARG00000006207	gpx1b	chr6:42269718-42272629	366.209	130.591	-1.48761	5e-05	yes	501.65	237.281	-1.08008	5e-05	yes	448.262	462.281	0.0444266	0.86045	no	174.875	133.06	-0.394243	0.038	no	1.48761	1.08008	-0.0444266	0.394243	yes	yes	no	no
ENSDARG00000004954	ENSDARG00000004954	grna	chr3:30065545-30092476	7.33765	3.84063	-0.933975	0.0032	yes	7.28752	3.01319	-1.27414	0.00215	yes	6.51212	9.26532	0.508712	0.1216	no	2.2226	3.9144	0.816541	0.0337	no	0.933975	1.27414	-0.508712	-0.816541	yes	yes	no	no
ENSDARG00000029406	ENSDARG00000029406	h2afx	chr5:32173723-32174335	7.26564	3.36063	-1.11236	0.00015	yes	13.6405	6.68872	-1.02809	0.0003	yes	12.1887	9.17545	-0.409691	0.1384	no	4.93042	3.42398	-0.526038	0.09075	no	1.11236	1.02809	0.409691	0.526038	yes	yes	no	no
ENSDARG00000089124	ENSDARG00000089124	hbae1	chr3:55990092-55990796	19.4052	2.79211	-2.79702	5e-05	yes	22.2799	5.48643	-2.0218	5e-05	yes	19.9088	24.4213	0.294729	0.275	no	4.04379	2.84564	-0.506952	0.1361	no	2.79702	2.0218	-0.294729	0.506952	yes	yes	no	no
ENSDARG00000089475	ENSDARG00000089475	hbae1	chr3:55972045-55972738	5.91894	1.1624	-2.34824	5e-05	yes	7.38704	2.36616	-1.64245	0.00015	yes	6.60094	7.4524	0.175035	0.58655	no	1.7446	1.18358	-0.559742	1	no	2.34824	1.64245	-0.175035	0.559742	yes	yes	no	no
ENSDARG00000079305	ENSDARG00000079305	hbae3	chr3:55998268-55999416	183.567	36.6696	-2.32365	5e-05	yes	199.869	63.7509	-1.64854	5e-05	yes	178.599	231.041	0.371421	0.1396	no	46.9977	37.3591	-0.331132	0.1088	no	2.32365	1.64854	-0.371421	0.331132	yes	yes	no	no
ENSDARG00000089963	ENSDARG00000089963	hbbe1.1	chr3:55965768-55966544	52.5349	16.5734	-1.6644	5e-05	yes	74.2011	27.0351	-1.45661	5e-05	yes	66.3049	66.1758	-0.00281241	0.9909	no	19.9228	16.8765	-0.239404	0.29615	no	1.6644	1.45661	0.00281241	0.239404	yes	yes	no	no
ENSDARG00000045143	ENSDARG00000045143	hbbe2	chr12:21694943-21706034	79.6063	29.0471	-1.45449	5e-05	yes	126.589	43.2015	-1.551	5e-05	yes	113.116	100.245	-0.174282	0.503	no	31.8415	29.5862	-0.105982	0.6295	no	1.45449	1.551	0.174282	0.105982	yes	yes	no	no
ENSDARG00000028517	ENSDARG00000028517	hbp1	chr25:3507865-3527071	9.51669	21.2848	1.16129	5e-05	yes	9.21431	29.7987	1.6933	5e-05	yes	8.23367	12.0521	0.549676	0.0256	no	21.9591	21.6908	-0.0177341	0.92815	no	-1.16129	-1.6933	-0.549676	0.0177341	yes	yes	no	no
ENSDARG00000012729	ENSDARG00000012729	hcls1	chr4:21236016-21247351	6.92642	3.92799	-0.818318	0.0001	yes	9.48052	6.40694	-0.565331	0.0086	yes	8.47152	8.74946	0.0465725	0.8362	no	4.72303	3.99969	-0.239826	0.26585	no	0.818318	0.565331	-0.0465725	0.239826	yes	no	no	no
ENSDARG00000059231	ENSDARG00000059231	hephl1	chr15:2411042-2459383	5.45233	2.54111	-1.10141	5e-05	yes	5.35412	2.668	-1.00489	5e-05	yes	4.78431	6.88735	0.52564	0.03185	no	1.96596	2.58928	0.397314	0.11205	no	1.10141	1.00489	-0.52564	-0.397314	yes	yes	no	no
ENSDARG00000077504	ENSDARG00000077504	HIST1H1T	chr8:30566733-30567435	3.73465	0.937337	-1.99433	5e-05	yes	5.71867	0.664102	-3.1062	5e-05	yes	5.11003	4.70469	-0.119233	0.7061	no	0.489479	0.954001	0.962744	1	no	1.99433	3.1062	0.119233	-0.962744	yes	yes	no	no
ENSDARG00000055101	ENSDARG00000055101	hmox2a	chr22:27479832-27487286	18.6097	36.8348	0.985015	5e-05	yes	17.9672	45.01	1.32488	5e-05	yes	16.055	23.5307	0.551523	0.0277	no	33.173	37.5232	0.177773	0.3862	no	-0.985015	-1.32488	-0.551523	-0.177773	yes	yes	no	no
ENSDARG00000056407	ENSDARG00000056407	irf8	chr18:30512222-30518127	3.29332	1.38586	-1.24876	0.0001	yes	6.41143	1.5261	-2.0708	5e-05	yes	5.72911	4.15855	-0.462231	0.0706	no	1.12485	1.41134	0.327331	1	no	1.24876	2.0708	0.462231	-0.327331	yes	yes	no	no
ENSDARG00000026582	ENSDARG00000026582	ISCU (2 of 2)	chr5:33497657-33506462	9.72904	17.996	0.887304	0.0001	yes	12.3066	21.1468	0.781015	0.00055	yes	10.9969	12.3052	0.16217	0.5301	no	15.5868	18.3298	0.23386	0.2738	no	-0.887304	-0.781015	-0.16217	-0.23386	yes	no	no	no
ENSDARG00000057787	ENSDARG00000057787	ITGAE	chr15:16189204-16232608	2.64158	1.48018	-0.835625	0.0001	yes	3.09818	1.23028	-1.33243	5e-05	yes	2.76847	3.33474	0.268484	0.25255	no	0.906801	1.50761	0.73341	1	no	0.835625	1.33243	-0.268484	-0.73341	yes	yes	no	no
ENSDARG00000016939	ENSDARG00000016939	itgb2	chr9:46027571-46051049	5.00038	2.73685	-0.869524	5e-05	yes	9.55709	3.7173	-1.36231	5e-05	yes	8.53997	6.31271	-0.435973	0.058	no	2.74013	2.7878	0.0248833	0.90665	no	0.869524	1.36231	0.435973	-0.0248833	yes	yes	no	no
ENSDARG00000074378	ENSDARG00000074378	junba	chr1:52226931-52228476	23.1822	7.65414	-1.59871	5e-05	yes	48.0617	14.5819	-1.7207	5e-05	yes	42.9467	29.2664	-0.553303	0.0195	no	10.7436	7.80413	-0.461169	0.04425	no	1.59871	1.7207	0.553303	0.461169	yes	yes	no	no
ENSDARG00000077375	ENSDARG00000077375	kif22	chr12:5786158-5809951	2.3285	1.28559	-0.856968	0.00195	yes	4.90313	1.98885	-1.30177	5e-05	yes	4.38129	2.94184	-0.574637	0.0294	no	1.46583	1.31001	-0.162141	1	no	0.856968	1.30177	0.574637	0.162141	yes	yes	no	no
ENSDARG00000008275	ENSDARG00000008275	KLHL24 (1 of 2)	chr24:26558509-26585443	21.9664	39.9628	0.863357	5e-05	yes	25.2983	62.0985	1.29552	5e-05	yes	22.6058	27.8039	0.298597	0.21515	no	45.7701	40.7276	-0.168397	0.3818	no	-0.863357	-1.29552	-0.298597	0.168397	yes	yes	no	no
ENSDARG00000014013	ENSDARG00000014013	lbr	chr20:36420270-36441530	2.86826	1.45631	-0.977857	0.00015	yes	5.86522	2.79293	-1.07041	5e-05	yes	5.24101	3.62601	-0.531461	0.03125	no	2.05867	1.48373	-0.472478	1	no	0.977857	1.07041	0.531461	0.472478	yes	yes	no	no
ENSDARG00000023188	ENSDARG00000023188	lcp1	chr9:57977605-57985364	4.49853	1.85766	-1.27597	5e-05	yes	4.14691	1.00545	-2.0442	5e-05	yes	3.70556	5.46819	0.616904	0.0138	no	0.741173	1.89165	1.35176	1	no	1.27597	2.0442	-0.616904	-1.35176	yes	yes	no	no
ENSDARG00000039150	ENSDARG00000039150	lgmn	chr13:36441274-36451926	367.974	667.836	0.85989	0.00175	yes	340.371	786.879	1.20903	5e-05	yes	304.145	465.517	0.614076	0.0371	no	579.873	680.312	0.230459	0.26655	no	-0.85989	-1.20903	-0.614076	-0.230459	yes	yes	no	no
ENSDARG00000089138	ENSDARG00000089138	LONRF2	chr1:27451829-27533686	20.6249	36.3775	0.81866	0.0001	yes	19.997	53.2255	1.41233	5e-05	yes	17.8688	26.0562	0.54419	0.0163	no	39.226	37.0724	-0.0814654	0.6647	no	-0.81866	-1.41233	-0.54419	0.0814654	yes	yes	no	no
ENSDARG00000076773	ENSDARG00000076773	lrrc58a	chr1:47983210-47990068	12.8884	22.8802	0.82802	0.0001	yes	22.7441	37.9244	0.737637	0.0002	yes	20.3234	16.2858	-0.319527	0.17085	no	27.9521	23.3235	-0.261172	0.18995	no	-0.82802	-0.737637	0.319527	0.261172	yes	no	no	no
ENSDARG00000031715	ENSDARG00000031715	lyn	chr2:27725639-27757359	13.7343	5.18083	-1.40653	5e-05	yes	13.4903	6.63975	-1.02272	5e-05	yes	12.0546	17.3654	0.526636	0.02135	no	4.89347	5.27694	0.108843	0.5902	no	1.40653	1.02272	-0.526636	-0.108843	yes	yes	no	no
ENSDARG00000033609	ENSDARG00000033609	map1lc3a	chr11:27542667-27549148	43.6817	83.7409	0.938905	5e-05	yes	50.2201	115.936	1.20699	5e-05	yes	44.8751	55.1598	0.2977	0.18405	no	85.4459	85.3566	-0.0015092	0.9934	no	-0.938905	-1.20699	-0.2977	0.0015092	yes	yes	no	no
ENSDARG00000096586	ENSDARG00000096586	MFAP4 (11 of 14)	chr1:59881598-59885183	3.17506	5.77677	0.863481	0.00195	yes	2.79197	6.27128	1.16748	0.00045	yes	2.49484	4.0091	0.684327	0.04005	no	4.62218	5.88779	0.349152	0.19685	no	-0.863481	-1.16748	-0.684327	-0.349152	yes	yes	no	no
ENSDARG00000091150	ENSDARG00000091150	MKI67	chr12:11445702-11460368	6.61521	3.61698	-0.871	5e-05	yes	12.9783	4.78595	-1.43923	5e-05	yes	11.597	8.36776	-0.470838	0.04345	no	3.52767	3.68529	0.0630613	0.75125	no	0.871	1.43923	0.470838	-0.0630613	yes	yes	no	no
ENSDARG00000068779	ENSDARG00000068779	mlycd	chr18:13722607-13860871	1.56124	2.7547	0.819207	0.003	yes	2.66629	5.86244	1.13667	5e-05	yes	2.38252	1.97127	-0.273363	0.3601	no	4.32048	2.80801	-0.621645	0.01545	no	-0.819207	-1.13667	0.273363	0.621645	yes	yes	no	no
ENSDARG00000043093	ENSDARG00000043093	MPEG1 (2 of 3)	chr8:19881016-19884779	9.27517	3.44903	-1.42718	5e-05	yes	19.7205	6.32081	-1.64152	5e-05	yes	17.6216	11.7334	-0.586724	0.01335	no	4.65866	3.51114	-0.407973	0.06505	no	1.42718	1.64152	0.586724	0.407973	yes	yes	no	no
ENSDARG00000006394	ENSDARG00000006394	mre11a	chr15:2849208-2949259	2.58229	1.22221	-1.07916	0.00015	yes	3.00442	1.65424	-0.860914	0.0017	yes	2.68465	3.26107	0.280611	0.29845	no	1.21913	1.245	0.0302924	1	no	1.07916	0.860914	-0.280611	-0.0302924	yes	yes	no	no
ENSDARG00000022378	ENSDARG00000022378	mtmr1b	chr21:33053926-33084023	1.66863	3.1091	0.89783	0.00255	yes	1.38801	4.4924	1.69447	5e-05	yes	1.24027	2.10662	0.764272	0.032	no	3.31172	3.16788	-0.064064	0.81835	no	-0.89783	-1.69447	-0.764272	0.064064	yes	yes	no	no
ENSDARG00000024789	ENSDARG00000024789	mxc	chr9:33838995-33846485	4.85443	0.65995	-2.87887	5e-05	yes	6.16174	0.222288	-4.79284	5e-05	yes	5.50598	6.14371	0.158112	0.51685	no	0.163873	0.672909	2.03783	1	no	2.87887	4.79284	-0.158112	-2.03783	yes	yes	no	no
ENSDARG00000007241	ENSDARG00000007241	mycb	chr2:31734130-31736246	17.1031	8.58838	-0.993802	5e-05	yes	21.493	12.5251	-0.779045	0.0001	yes	19.2056	21.6243	0.171128	0.4574	no	9.23153	8.74908	-0.0774384	0.7055	no	0.993802	0.779045	-0.171128	0.0774384	yes	no	no	no
ENSDARG00000078734	ENSDARG00000078734	myo1f	chr8:20788501-20829940	2.04064	0.956739	-1.09282	5e-05	yes	4.06484	0.981671	-2.04989	5e-05	yes	3.63224	2.57696	-0.49519	0.0454	no	0.723742	0.974283	0.428865	1	no	1.09282	2.04989	0.49519	-0.428865	yes	yes	no	no
ENSDARG00000039208	ENSDARG00000039208	nasp	chr6:33596045-33614433	18.5547	9.53401	-0.96063	0.0003	yes	26.0407	16.7999	-0.632318	0.00975	yes	23.2691	23.4547	0.0114622	0.9652	no	12.3843	9.71295	-0.350531	0.17505	no	0.96063	0.632318	-0.0114622	0.350531	yes	no	no	no
ENSDARG00000075748	ENSDARG00000075748	NCKAP1L	chr11:190527-208352	2.54518	1.42951	-0.832242	0.0005	yes	3.71936	1.2189	-1.60947	5e-05	yes	3.32353	3.2136	-0.0485294	0.8425	no	0.898491	1.45585	0.696286	1	no	0.832242	1.60947	0.0485294	-0.696286	yes	yes	no	no
ENSDARG00000056047	ENSDARG00000056047	noxa1	chr5:30781286-30790954	8.69465	3.70938	-1.22895	0.0002	yes	19.4107	6.16868	-1.65382	5e-05	yes	17.345	10.9922	-0.65803	0.0228	no	4.54639	3.78138	-0.265812	0.45045	no	1.22895	1.65382	0.65803	0.265812	yes	yes	no	no
ENSDARG00000011281	ENSDARG00000011281	osbpl1a	chr22:16535778-16570512	2.09386	3.85041	0.878851	5e-05	yes	3.49747	5.45624	0.641598	0.0034	yes	3.12525	2.64406	-0.241218	0.3346	no	4.02128	3.92503	-0.0349516	0.8723	no	-0.878851	-0.641598	0.241218	0.0349516	yes	no	no	no
ENSDARG00000052688	ENSDARG00000052688	paqr5b	chr7:34791657-34807599	6.71472	12.029	0.841119	0.0001	yes	7.4643	11.4477	0.616983	0.00985	yes	6.66986	8.47181	0.345014	0.17525	no	8.43764	12.2594	0.538982	0.01135	no	-0.841119	-0.616983	-0.345014	-0.538982	yes	no	no	no
ENSDARG00000036017	ENSDARG00000036017	paqr7a	chr19:30412574-30413648	1.50307	3.72593	1.30968	5e-05	yes	2.09269	5.20736	1.3152	0.00025	yes	1.86996	1.9001	0.0230727	1	no	3.83837	3.79526	-0.0162933	0.9492	no	-1.30968	-1.3152	-0.0230727	0.0162933	yes	yes	no	no
ENSDARG00000071007	ENSDARG00000071007	pcgf5a	chr17:23264037-23276513	1.56578	2.90945	0.893869	0.00255	yes	3.25397	5.43495	0.740064	0.0125	yes	2.90767	1.97736	-0.556285	0.0878	no	4.00566	2.96486	-0.434073	0.1083	no	-0.893869	-0.740064	0.556285	0.434073	yes	no	no	no
ENSDARG00000018491	ENSDARG00000018491	pdia4	chr24:17883782-17890563	55.102	28.6684	-0.942642	0.0002	yes	69.3732	35.6837	-0.959115	5e-05	yes	61.9902	69.4431	0.163792	0.54815	no	26.3067	29.1795	0.149526	0.49485	no	0.942642	0.959115	-0.163792	-0.149526	yes	yes	no	no
ENSDARG00000045308	ENSDARG00000045308	pola1	chr24:24448796-24540473	2.25668	0.887932	-1.34568	5e-05	yes	3.35967	2.00634	-0.743755	0.00085	yes	3.00209	2.85547	-0.07224	0.7676	no	1.4789	0.90492	-0.708667	1	no	1.34568	0.743755	0.07224	0.708667	yes	no	no	no
ENSDARG00000076718	ENSDARG00000076718	prkra	chr9:1354405-1360178	4.52155	2.25009	-1.00684	5e-05	yes	8.14625	4.22281	-0.947934	0.00015	yes	7.27937	5.70673	-0.351149	0.17355	no	3.11352	2.29238	-0.441701	0.1086	no	1.00684	0.947934	0.351149	0.441701	yes	yes	no	no
ENSDARG00000071437	ENSDARG00000071437	ptprc	chr22:24703748-24794350	3.63165	1.68013	-1.11205	5e-05	yes	4.42568	1.22038	-1.85857	5e-05	yes	3.95467	4.58588	0.213639	0.38355	no	0.899471	1.71127	0.927916	1	no	1.11205	1.85857	-0.213639	-0.927916	yes	yes	no	no
ENSDARG00000053965	ENSDARG00000053965	pycr1	chr3:58811867-58846060	2.59328	4.94932	0.932452	0.00035	yes	2.92116	4.75763	0.703705	0.00455	yes	2.61027	3.26841	0.32439	0.22665	no	3.50625	5.04987	0.526316	0.0225	no	-0.932452	-0.703705	-0.32439	-0.526316	yes	no	no	no
ENSDARG00000063031	ENSDARG00000063031	rad54l2	chr22:10717012-10749172	3.97699	8.22808	1.04888	5e-05	yes	3.87837	11.0713	1.5133	5e-05	yes	3.46562	5.02262	0.535326	0.02	no	8.16004	8.39278	0.0405722	0.8418	no	-1.04888	-1.5133	-0.535326	-0.0405722	yes	yes	no	no
ENSDARG00000029058	ENSDARG00000029058	rbb4	chr19:32243948-32252815	11.5686	6.24303	-0.889896	0.0001	yes	23.1339	11.6653	-0.987789	5e-05	yes	20.6718	14.6129	-0.500422	0.03155	no	8.59854	6.35874	-0.43535	0.0379	no	0.889896	0.987789	0.500422	0.43535	yes	yes	no	no
ENSDARG00000017653	ENSDARG00000017653	rgs13	chr2:6179989-6186663	3.84067	1.24257	-1.62803	5e-05	yes	3.40978	1.15458	-1.56231	5e-05	yes	3.04689	4.85803	0.673036	0.01955	no	0.851055	1.26533	0.572185	1	no	1.62803	1.56231	-0.673036	-0.572185	yes	yes	no	no
ENSDARG00000003203	ENSDARG00000003203	rhcga	chr7:15168691-15180088	18.6243	6.05987	-1.61983	5e-05	yes	39.0084	16.1435	-1.27283	5e-05	yes	34.8562	23.5312	-0.566842	0.0989	no	11.9064	6.18116	-0.945794	0.0225	no	1.61983	1.27283	0.566842	0.945794	yes	yes	no	no
ENSDARG00000016868	ENSDARG00000016868	rhobtb2a	chr5:45089104-45121257	1.17367	2.43955	1.05559	0.0002	yes	1.84533	3.39319	0.878763	0.00135	yes	1.64894	1.48169	-0.1543	1	no	2.50079	2.48881	-0.00692948	0.9759	no	-1.05559	-0.878763	0.1543	0.00692948	yes	yes	no	no
ENSDARG00000002613	ENSDARG00000002613	rpa3	chr19:25950689-25952850	8.01532	3.79142	-1.08002	0.0003	yes	14.128	7.69183	-0.877159	0.00175	yes	12.6243	10.1329	-0.317158	0.24185	no	5.67077	3.86164	-0.554332	0.06325	no	1.08002	0.877159	0.317158	0.554332	yes	yes	no	no
ENSDARG00000014017	ENSDARG00000014017	rrm1	chr21:29535096-29550468	8.01421	3.1474	-1.3484	5e-05	yes	12.4051	5.89925	-1.07233	5e-05	yes	11.0848	10.1472	-0.127501	0.58935	no	4.3486	3.20447	-0.440465	0.0455	no	1.3484	1.07233	0.127501	0.440465	yes	yes	no	no
ENSDARG00000016188	ENSDARG00000016188	SBNO2 (2 of 3)	chr22:17916316-17984407	14.2732	7.59517	-0.910157	0.0001	yes	24.8735	13.931	-0.836311	0.0001	yes	22.2263	18.0458	-0.300608	0.2366	no	10.2673	7.74189	-0.4073	0.04155	no	0.910157	0.836311	0.300608	0.4073	yes	yes	no	no
ENSDARG00000058292	ENSDARG00000058292	sephs1	chr18:7832204-7844723	3.46015	1.57794	-1.13279	0.00015	yes	5.02889	2.77874	-0.855809	0.00115	yes	4.49366	4.36559	-0.0417148	0.89025	no	2.04857	1.6065	-0.350695	1	no	1.13279	0.855809	0.0417148	0.350695	yes	yes	no	no
ENSDARG00000067566	ENSDARG00000067566	SFTPB (2 of 2)	chr5:71749762-71780926	5.50218	2.72293	-1.01484	5e-05	yes	9.43149	5.4841	-0.782229	0.0006	yes	8.42775	6.95006	-0.278123	0.25	no	4.04169	2.77266	-0.543689	0.0227	no	1.01484	0.782229	0.278123	0.543689	yes	no	no	no
ENSDARG00000079353	ENSDARG00000079353	si:ch211-165d12.4	chr3:34673283-34678935	5.96005	2.86607	-1.05625	0.0006	yes	5.32504	2.91646	-0.868573	0.00455	yes	4.7583	7.52838	0.661894	0.03445	no	2.15021	2.91855	0.440776	0.15525	no	1.05625	0.868573	-0.661894	-0.440776	yes	yes	no	no
ENSDARG00000005271	ENSDARG00000005271	si:ch211-175f12.1	chr16:4965734-4985682	8.83494	3.39357	-1.38042	5e-05	yes	12.9476	4.37683	-1.56473	5e-05	yes	11.5696	11.1864	-0.0486	0.84545	no	3.22599	3.45827	0.100309	0.6961	no	1.38042	1.56473	0.0486	-0.100309	yes	yes	no	no
ENSDARG00000094104	ENSDARG00000094104	si:ch211-213i16.3	chr20:46329262-46333206	7.65471	0.904906	-3.08051	5e-05	yes	12.4874	1.53408	-3.02503	0.0002	yes	11.1586	9.67698	-0.205524	0.5642	no	1.13142	0.922546	-0.294446	1	no	3.08051	3.02503	0.205524	0.294446	yes	yes	no	no
ENSDARG00000060622	ENSDARG00000060622	si:ch211-267e7.2	chr2:20308865-20325163	36.4154	16.8209	-1.1143	5e-05	yes	50.8465	27.4173	-0.891064	5e-05	yes	45.4352	45.9582	0.0165131	0.9431	no	20.2037	17.1477	-0.236601	0.22245	no	1.1143	0.891064	-0.0165131	0.236601	yes	yes	no	no
ENSDARG00000088330	ENSDARG00000088330	si:ch211-5k11.2	chr3:55979220-55979930	12.5641	1.60639	-2.96742	5e-05	yes	12.0323	3.0163	-1.99605	5e-05	yes	10.7518	15.8082	0.556097	0.0582	no	2.2246	1.63715	-0.442359	1	no	2.96742	1.99605	-0.556097	0.442359	yes	yes	no	no
ENSDARG00000041524	ENSDARG00000041524	si:ch211-9d9.1	chr2:51648980-51671212	14.237	2.8876	-2.3017	5e-05	yes	15.3619	2.37736	-2.69192	5e-05	yes	13.7271	17.9375	0.385954	0.2601	no	1.75272	2.94261	0.747498	0.0553	no	2.3017	2.69192	-0.385954	-0.747498	yes	yes	no	no
ENSDARG00000074719	ENSDARG00000074719	si:ch73-173m3.3	chr21:29292599-29304551	1.3686	2.97935	1.12229	0.00085	yes	0.974035	2.33574	1.26183	0.00625	yes	0.870368	1.72945	0.990619	1	no	1.7221	3.03459	0.817337	0.0222	no	-1.12229	-1.26183	-0.990619	-0.817337	yes	yes	no	no
ENSDARG00000021849	ENSDARG00000021849	si:dkey-256h2.1	chr16:50574341-50592491	4.01201	1.82779	-1.13423	5e-05	yes	4.60525	1.92988	-1.25477	5e-05	yes	4.11516	5.06797	0.30046	0.23085	no	1.42206	1.86277	0.389466	1	no	1.13423	1.25477	-0.30046	-0.389466	yes	yes	no	no
ENSDARG00000055365	ENSDARG00000055365	si:dkey-25e12.3	chr20:26573289-26580840	7.90264	3.37538	-1.22728	5e-05	yes	13.8404	3.99435	-1.79285	5e-05	yes	12.3674	9.99695	-0.306982	0.2021	no	2.94362	3.44135	0.225382	0.38365	no	1.22728	1.79285	0.306982	-0.225382	yes	yes	no	no
ENSDARG00000094428	ENSDARG00000094428	si:dkey-31f5.8	chr4:18021140-18022185	2.76618	0.700404	-1.98164	5e-05	yes	6.48163	1.75923	-1.88141	5e-05	yes	5.79182	3.49757	-0.727664	0.01835	no	1.29706	0.714231	-0.860778	1	no	1.98164	1.88141	0.727664	0.860778	yes	yes	no	no
ENSDARG00000038424	ENSDARG00000038424	si:dkey-8k3.2	chr16:18720424-18754319	15.4447	4.01784	-1.94262	5e-05	yes	27.68	4.06511	-2.76748	5e-05	yes	24.7343	19.5035	-0.342785	0.45995	no	2.99735	4.09416	0.449884	0.20225	no	1.94262	2.76748	0.342785	-0.449884	yes	yes	no	no
ENSDARG00000041835	ENSDARG00000041835	si:dkeyp-59a8.2	chr20:38304231-38305101	5.25243	2.63651	-0.994354	0.00185	yes	5.51939	0.853794	-2.69255	5e-05	yes	4.93198	6.6397	0.428951	0.19065	no	0.629835	2.68635	2.0926	1	no	0.994354	2.69255	-0.428951	-2.0926	yes	yes	no	no
ENSDARG00000069292	ENSDARG00000069292	si:dkeyp-89c11.1	chr4:24738852-24753696	4.98643	9.15531	0.876602	0.0001	yes	7.65321	16.531	1.11104	5e-05	yes	6.83865	6.29036	-0.120567	0.6498	no	12.1859	9.33234	-0.384906	0.0938	no	-0.876602	-1.11104	0.120567	0.384906	yes	yes	no	no
ENSDARG00000090882	ENSDARG00000090882	si:rp71-36a1.5	chr22:6107285-6118604	3.95847	1.05047	-1.91391	0.00075	yes	5.37814	1.10124	-2.28798	0.00025	yes	4.80573	5.00687	0.0591543	0.9108	no	0.811596	1.06962	0.398262	1	no	1.91391	2.28798	-0.0591543	-0.398262	yes	yes	no	no
ENSDARG00000060051	ENSDARG00000060051	slc47a2	chr21:38828532-38851912	1.3882	2.91877	1.07214	5e-05	yes	2.46195	3.93769	0.67755	0.01215	yes	2.19998	1.75089	-0.329403	1	no	2.90373	2.9745	0.034742	0.88055	no	-1.07214	-0.67755	0.329403	-0.034742	yes	no	no	no
ENSDARG00000012881	ENSDARG00000012881	slc4a1a	chr3:19955145-19981409	3.54577	0.512875	-2.78942	5e-05	yes	6.15057	1.23239	-2.31926	5e-05	yes	5.49604	4.46136	-0.300907	0.31035	no	0.908616	0.522769	-0.797496	1	no	2.78942	2.31926	0.300907	0.797496	yes	yes	no	no
ENSDARG00000017744	ENSDARG00000017744	smc2	chr1:18277014-18304105	2.64753	0.558974	-2.24379	5e-05	yes	6.46197	2.52434	-1.35607	0.0011	yes	5.7742	3.34924	-0.78579	0.01725	no	1.86051	0.56895	-1.70932	1	no	2.24379	1.35607	0.78579	1.70932	yes	yes	no	no
ENSDARG00000071430	ENSDARG00000071430	smyhc1	chr24:42241036-42252740	2.64628	1.06074	-1.31889	5e-05	yes	2.25001	1.20344	-0.902762	0.00205	yes	2.01047	3.3372	0.731105	0.0234	no	0.888035	1.08277	0.286038	1	no	1.31889	0.902762	-0.731105	-0.286038	yes	yes	no	no
ENSDARG00000038095	ENSDARG00000038095	socs1a	chr3:26202889-26204785	20.3235	10.771	-0.915992	5e-05	yes	26.8321	11.3694	-1.23881	5e-05	yes	23.9764	25.7391	0.102347	0.67495	no	8.38122	10.9782	0.389407	0.07715	no	0.915992	1.23881	-0.102347	-0.389407	yes	yes	no	no
ENSDARG00000026611	ENSDARG00000026611	socs3b	chr12:37046022-37050248	33.8119	13.2843	-1.34781	5e-05	yes	49.7441	20.168	-1.30246	5e-05	yes	44.4499	42.7021	-0.0578734	0.79765	no	14.8652	13.5344	-0.135308	0.48545	no	1.34781	1.30246	0.0578734	0.135308	yes	yes	no	no
ENSDARG00000067797	ENSDARG00000067797	spi1a	chr25:36640986-36659668	4.55371	1.9337	-1.23568	5e-05	yes	9.7487	2.33054	-2.06455	5e-05	yes	8.7112	5.7493	-0.599487	0.0248	no	1.71839	1.96968	0.196908	1	no	1.23568	2.06455	0.599487	-0.196908	yes	yes	no	no
ENSDARG00000022712	ENSDARG00000022712	stat3	chr3:16650645-16727426	22.7096	10.0156	-1.18105	5e-05	yes	28.7583	18.7682	-0.615689	0.00115	yes	25.6977	28.7359	0.161214	0.49185	no	13.8302	10.2039	-0.438702	0.0244	no	1.18105	0.615689	-0.161214	0.438702	yes	no	no	no
ENSDARG00000028731	ENSDARG00000028731	stat4	chr9:42193200-42280078	21.0845	9.00799	-1.2269	0.0004	yes	29.8636	13.2196	-1.17571	5e-05	yes	26.6853	26.6839	-7.36692e-05	0.99985	no	9.74346	9.1775	-0.0863329	0.78455	no	1.2269	1.17571	7.36692e-05	0.0863329	yes	yes	no	no
ENSDARG00000059003	ENSDARG00000059003	STRIP2	chr4:4846232-4891932	2.82242	1.52542	-0.88773	0.0002	yes	4.17525	2.62081	-0.671852	0.00585	yes	3.73092	3.561	-0.0672495	0.7941	no	1.93152	1.55442	-0.313353	1	no	0.88773	0.671852	0.0672495	0.313353	yes	no	no	no
ENSDARG00000044039	ENSDARG00000044039	stx11a	chr17:7567511-7573085	2.3524	1.09256	-1.10642	0.0003	yes	5.29736	1.5102	-1.81054	5e-05	yes	4.73362	2.97297	-0.671041	0.0159	no	1.11321	1.11294	-0.000342486	1	no	1.10642	1.81054	0.671041	0.000342486	yes	yes	no	no
ENSDARG00000008186	ENSDARG00000008186	syk	chr10:5539533-5584889	3.57314	1.72524	-1.05039	5e-05	yes	3.43701	1.03454	-1.73216	5e-05	yes	3.07129	4.51395	0.555549	0.0321	no	0.762866	1.75736	1.2039	1	no	1.05039	1.73216	-0.555549	-1.2039	yes	yes	no	no
ENSDARG00000090402	ENSDARG00000090402	tank	chr9:52824676-52831470	3.87331	1.89703	-1.02982	0.00265	yes	7.86827	3.51543	-1.16234	0.0018	yes	7.03085	4.89903	-0.521202	0.11165	no	2.5911	1.93171	-0.423683	1	no	1.02982	1.16234	0.521202	0.423683	yes	yes	no	no
ENSDARG00000089399	ENSDARG00000089399	tmem176l.2	chr16:49753665-49759290	448.406	153.235	-1.54907	5e-05	yes	449.754	239.286	-0.910398	5e-05	yes	401.888	566.585	0.495501	0.05715	no	176.36	156.06	-0.176422	0.3601	no	1.54907	0.910398	-0.495501	0.176422	yes	yes	no	no
ENSDARG00000060498	ENSDARG00000060498	tnfrsf9a	chr23:30244784-30250014	5.20387	2.14405	-1.27925	5e-05	yes	7.80791	3.73452	-1.06401	5e-05	yes	6.97695	6.58161	-0.084157	0.7542	no	2.75203	2.18363	-0.333766	0.2336	no	1.27925	1.06401	0.084157	0.333766	yes	yes	no	no
ENSDARG00000074501	ENSDARG00000074501	TNIP2	chr1:37223710-37227925	5.25228	2.70329	-0.958227	0.0002	yes	8.61877	3.18849	-1.43461	5e-05	yes	7.70155	6.64139	-0.213662	0.3982	no	2.35032	2.75495	0.229168	0.40055	no	0.958227	1.43461	0.213662	-0.229168	yes	yes	no	no
ENSDARG00000026655	ENSDARG00000026655	tspo	chr6:40509085-40514065	59.0522	103.935	0.815617	5e-05	yes	58.0892	135.442	1.22133	5e-05	yes	51.9067	74.7012	0.525209	0.0268	no	99.8308	105.852	0.0844965	0.64875	no	-0.815617	-1.22133	-0.525209	-0.0844965	yes	yes	no	no
ENSDARG00000042894	ENSDARG00000042894	tyms	chr7:75222915-75229200	4.68322	1.6896	-1.47082	5e-05	yes	8.10456	3.97192	-1.0289	5e-05	yes	7.24197	5.92455	-0.289677	0.2676	no	2.92781	1.72155	-0.766117	0.0105	no	1.47082	1.0289	0.289677	0.766117	yes	yes	no	no
ENSDARG00000087180	ENSDARG00000087180	ubxn2a	chr20:44769708-44782717	3.54024	7.94334	1.1659	5e-05	yes	3.6816	8.79295	1.25601	5e-05	yes	3.28977	4.47599	0.444219	0.1767	no	6.48174	8.09865	0.3213	0.2413	no	-1.1659	-1.25601	-0.444219	-0.3213	yes	yes	no	no
ENSDARG00000078731	ENSDARG00000078731	URGCP (1 of 3)	chr7:23101877-23106404	3.23199	1.28199	-1.33404	5e-05	yes	3.54434	0.384449	-3.20466	5e-05	yes	3.16708	4.09955	0.372312	0.16005	no	0.283241	1.30206	2.2007	1	no	1.33404	3.20466	-0.372312	-2.2007	yes	yes	no	no
ENSDARG00000059110	ENSDARG00000059110	VASP (2 of 2)	chr10:1938-19705	2.48661	1.15738	-1.10331	5e-05	yes	2.50926	0.764436	-1.7148	5e-05	yes	2.24221	3.13998	0.485836	0.0696	no	0.563598	1.17883	1.06461	1	no	1.10331	1.7148	-0.485836	-1.06461	yes	yes	no	no
ENSDARG00000020994	ENSDARG00000020994	wu:fb63a08	chr2:47425940-47435272	55.1738	13.2069	-2.06269	5e-05	yes	54.1283	21.2271	-1.35047	5e-05	yes	48.3683	69.5545	0.524082	0.03745	no	15.6449	13.4611	-0.216891	0.2759	no	2.06269	1.35047	-0.524082	0.216891	yes	yes	no	no
ENSDARG00000054929	ENSDARG00000054929	zgc:110540	chr21:25879335-25883673	2.9097	0.863361	-1.75283	5e-05	yes	4.44059	2.48656	-0.836596	0.0032	yes	3.96797	3.6829	-0.107559	0.6952	no	1.833	0.880346	-1.05806	1	no	1.75283	0.836596	0.107559	1.05806	yes	yes	no	no
ENSDARG00000052923	ENSDARG00000052923	zgc:113162	chr21:11585509-11634641	4.12326	8.1855	0.989285	5e-05	yes	4.63071	14.2044	1.61703	5e-05	yes	4.13783	5.20477	0.330962	0.20325	no	10.4711	8.34513	-0.327407	0.12325	no	-0.989285	-1.61703	-0.330962	0.327407	yes	yes	no	no
ENSDARG00000071648	ENSDARG00000071648	zgc:113298	chr22:6266867-6286559	4.57002	2.33789	-0.966993	0.00015	yes	5.21219	2.82586	-0.883201	0.0022	yes	4.65746	5.77628	0.310597	0.24635	no	2.08305	2.38136	0.193085	0.5029	no	0.966993	0.883201	-0.310597	-0.193085	yes	yes	no	no
ENSDARG00000038133	ENSDARG00000038133	zgc:113411	chr3:24932186-24941134	2.96381	1.37048	-1.11277	0.0006	yes	5.763	3.03607	-0.924614	0.0008	yes	5.14964	3.74953	-0.457764	0.0956	no	2.23806	1.3958	-0.68116	0.03715	no	1.11277	0.924614	0.457764	0.68116	yes	yes	no	no
ENSDARG00000026616	ENSDARG00000026616	zgc:113425	chr14:49125855-49133422	4.0002	2.04051	-0.971144	0.0005	yes	3.59621	1.84696	-0.961325	0.00405	yes	3.21348	5.06671	0.656914	0.02875	no	1.36114	2.07778	0.610229	1	no	0.971144	0.961325	-0.656914	-0.610229	yes	yes	no	no
ENSDARG00000059679	ENSDARG00000059679	zgc:158343	chr5:10606823-10607450	4.70647	1.73758	-1.43756	5e-05	yes	5.94979	1.30486	-2.18895	5e-05	yes	5.31653	5.94258	0.160605	0.6073	no	0.961648	1.76957	0.879814	1	no	1.43756	2.18895	-0.160605	-0.879814	yes	yes	no	no
ENSDARG00000073820	ENSDARG00000073820	zgc:174917	chr14:11703544-11705974	52.0819	1.64	-4.98902	5e-05	yes	106.927	2.36848	-5.49653	5e-05	yes	95.5466	65.762	-0.53895	0.0209	no	1.74653	1.67125	-0.0635664	1	no	4.98902	5.49653	0.53895	0.0635664	yes	yes	no	no
ENSDARG00000054999	ENSDARG00000054999	zgc:66475	chr2:13740481-13773947	7.16603	15.4101	1.10463	5e-05	yes	11.0952	27.2045	1.29391	5e-05	yes	9.91433	9.07324	-0.127898	0.6003	no	20.0485	15.696	-0.353094	0.0729	no	-1.10463	-1.29391	0.127898	0.353094	yes	yes	no	no
ENSDARG00000004141	ENSDARG00000004141	zgc:92630	chr15:14434828-14456019	55.7241	100.176	0.84616	5e-05	yes	65.553	165.801	1.33872	5e-05	yes	58.576	70.3399	0.264033	0.2431	no	122.196	102.038	-0.260095	0.164	no	-0.84616	-1.33872	-0.264033	0.260095	yes	yes	no	no
ENSDARG00000059950	ENSDARG00000059950	ZPLXDC2	chr7:44246802-44357323	8.17346	14.5996	0.836909	5e-05	yes	11.2253	22.5949	1.00924	5e-05	yes	10.0306	10.3168	0.040586	0.85415	no	16.6551	14.8808	-0.16251	0.3865	no	-0.836909	-1.00924	-0.040586	0.16251	yes	yes	no	no
ENSDARG00000071090	ENSDARG00000071090	actn2	chr17:19952171-19974099	2.20218	0.877821	-1.32693	5e-05	yes	3.5907	3.00068	-0.258974	0.2967	no	3.20854	2.77691	-0.208436	0.41495	no	2.21378	0.895364	-1.30597	5e-05	yes	1.32693	0.258974	0.208436	1.30597	yes	no	no	yes
ENSDARG00000057995	ENSDARG00000057995	arl15b	chr10:9095632-9188481	9.69778	19.1434	0.981118	5e-05	yes	10.3759	15.1998	0.550821	0.0232	no	9.27156	12.2505	0.401958	0.13425	no	11.2025	19.5095	0.800358	0.00045	yes	-0.981118	-0.550821	-0.401958	-0.800358	yes	no	no	no
ENSDARG00000053133	ENSDARG00000053133	b3gnt7l	chr8:22896914-22898471	6.48274	2.59083	-1.32319	5e-05	yes	9.27138	6.46704	-0.519679	0.02385	no	8.28462	8.19457	-0.0157685	0.9481	no	4.76808	2.63863	-0.853622	0.0011	yes	1.32319	0.519679	0.0157685	0.853622	yes	no	no	yes
ENSDARG00000026348	ENSDARG00000026348	csad	chr23:36476311-36493237	8.06567	14.1793	0.813922	0.00035	yes	11.1083	12.2342	0.139286	0.5061	no	9.92613	10.1663	0.0344869	0.88755	no	9.01844	14.4476	0.67988	0.00075	yes	-0.813922	-0.139286	-0.0344869	-0.67988	yes	no	no	no
ENSDARG00000062157	ENSDARG00000062157	csde1	chr8:23374601-23385843	2.85845	1.36812	-1.06303	5e-05	yes	3.57538	4.65806	0.381636	0.09005	no	3.19485	3.59942	0.172018	0.5058	no	3.43299	1.39363	-1.30062	5e-05	yes	1.06303	-0.381636	-0.172018	1.30062	yes	no	no	yes
ENSDARG00000038371	ENSDARG00000038371	cyp2k6	chr3:12440710-12450736	7.71617	15.3297	0.99037	0.0002	yes	6.91046	8.55595	0.308145	0.18665	no	6.17518	9.71864	0.654274	0.0331	no	6.30687	15.6456	1.31076	5e-05	yes	-0.99037	-0.308145	-0.654274	-1.31076	yes	no	no	yes
ENSDARG00000068290	ENSDARG00000068290	CYP2X12	chr7:53590870-53600175	1.28895	4.56326	1.82387	5e-05	yes	0.156759	0.675517	2.10745	1	no	0.140076	1.62559	3.53669	1	no	0.498103	4.65238	3.22345	5e-05	yes	-1.82387	-2.10745	-3.53669	-3.22345	yes	no	no	yes
ENSDARG00000043997	ENSDARG00000043997	cyp2x8	chr25:17601340-17752074	48.2865	117.942	1.28838	0.00135	yes	3.43897	28.226	3.03698	0.0264	no	3.073	61.0119	4.31137	0.0193	no	20.8072	120.196	2.53023	5e-05	yes	-1.28838	-3.03698	-4.31137	-2.53023	yes	no	no	yes
ENSDARG00000016044	ENSDARG00000016044	GINS4	chr8:54694450-54709562	3.33084	0.916031	-1.86242	5e-05	yes	5.09373	4.29566	-0.245843	0.4558	no	4.55158	4.21081	-0.11227	0.7244	no	3.16611	0.933263	-1.76236	0.0001	yes	1.86242	0.245843	0.11227	1.76236	yes	no	no	yes
ENSDARG00000062430	ENSDARG00000062430	gpd2	chr6:12291585-12371369	14.5377	7.16344	-1.02107	5e-05	yes	27.1222	20.1734	-0.42702	0.0307	no	24.2357	18.3398	-0.402153	0.0854	no	14.8681	7.29822	-1.02661	5e-05	yes	1.02107	0.42702	0.402153	1.02661	yes	no	no	yes
ENSDARG00000043447	ENSDARG00000043447	GPR55	chr15:38688378-38702457	1.5548	3.5521	1.19194	0.0001	yes	0.711938	1.74303	1.29178	1	no	0.636169	1.95716	1.62128	1	no	1.28491	3.6251	1.49636	5e-05	yes	-1.19194	-1.29178	-1.62128	-1.49636	yes	no	no	yes
ENSDARG00000068194	ENSDARG00000068194	klf9	chr5:27719778-27722714	36.9505	19.4967	-0.922362	5e-05	yes	40.0996	50.8769	0.343425	0.0794	no	35.8321	46.6875	0.381786	0.0988	no	37.4984	19.88	-0.915509	5e-05	yes	0.922362	-0.343425	-0.381786	0.915509	yes	no	no	yes
ENSDARG00000060041	ENSDARG00000060041	LIG1	chr2:44362776-44405822	5.45802	2.00897	-1.44192	5e-05	yes	7.73438	4.86139	-0.669919	0.01815	no	6.91117	6.90285	-0.00173674	0.9949	no	3.58345	2.0471	-0.807771	0.00895	yes	1.44192	0.669919	0.00173674	0.807771	yes	no	no	yes
ENSDARG00000077207	ENSDARG00000077207	lzts2b	chr12:48976626-48987988	2.40168	4.50179	0.906456	0.0003	yes	2.99381	3.55536	0.248012	0.3498	no	2.6752	3.03625	0.182643	0.5021	no	2.6207	4.58919	0.808286	0.001	yes	-0.906456	-0.248012	-0.182643	-0.808286	yes	no	no	yes
ENSDARG00000015911	ENSDARG00000015911	mcm2	Zv9_NA237:11388-31977	10.6093	5.94509	-0.835558	5e-05	yes	15.6177	12.6786	-0.300786	0.1261	no	13.9555	13.3921	-0.05945	0.7932	no	9.34673	6.06217	-0.624628	0.00205	yes	0.835558	0.300786	0.05945	0.624628	yes	no	no	no
ENSDARG00000040041	ENSDARG00000040041	mcm4	chr24:37031304-37056313	9.12961	4.84646	-0.913623	5e-05	yes	13.7043	10.1833	-0.428418	0.0316	no	12.2458	11.5286	-0.0870655	0.6941	no	7.50683	4.94159	-0.603228	0.00295	yes	0.913623	0.428418	0.0870655	0.603228	yes	no	no	no
ENSDARG00000057683	ENSDARG00000057683	mcm6	chr6:12880020-12897310	8.64851	4.48689	-0.946735	5e-05	yes	14.335	10.4173	-0.460558	0.01965	no	12.8093	10.9193	-0.230306	0.31195	no	7.67931	4.5743	-0.747426	0.0005	yes	0.946735	0.460558	0.230306	0.747426	yes	no	no	no
ENSDARG00000086786	ENSDARG00000086786	MFSD10	chr5:69208230-69224314	4.68239	2.19752	-1.09137	5e-05	yes	7.86734	5.40633	-0.541228	0.01905	no	7.03007	5.90847	-0.250756	0.30305	no	3.98483	2.23887	-0.831748	0.0014	yes	1.09137	0.541228	0.250756	0.831748	yes	no	no	yes
ENSDARG00000041623	ENSDARG00000041623	mt2	chr18:17193794-17195147	72.603	221.536	1.60944	5e-05	yes	97.7449	115.211	0.23719	0.23025	no	87.341	91.7137	0.0704776	0.7587	no	84.9261	225.849	1.41108	5e-05	yes	-1.60944	-0.23719	-0.0704776	-1.41108	yes	no	no	yes
ENSDARG00000090637	ENSDARG00000090637	myh6	chr20:53927301-53933235	2.51889	0.815017	-1.62789	5e-05	yes	3.26653	3.23599	-0.0135518	0.94885	no	2.91886	3.18148	0.124294	0.59165	no	2.38693	0.831379	-1.52158	5e-05	yes	1.62789	0.0135518	-0.124294	1.52158	yes	no	no	yes
ENSDARG00000019096	ENSDARG00000019096	myl7	chr8:42650574-42658403	34.4397	11.972	-1.52441	5e-05	yes	36.6735	49.8275	0.442206	0.04925	no	32.7709	43.4787	0.407893	0.08535	no	36.7653	12.2176	-1.58938	5e-05	yes	1.52441	-0.442206	-0.407893	1.58938	yes	no	no	yes
ENSDARG00000042332	ENSDARG00000042332	plin2	chr15:16049487-16067837	6.67288	3.55026	-0.910385	0.00135	yes	11.0462	9.42821	-0.228494	0.39275	no	9.8707	8.4374	-0.226354	0.4431	no	6.94712	3.61983	-0.940494	0.001	yes	0.910385	0.228494	0.226354	0.940494	yes	no	no	yes
ENSDARG00000036114	ENSDARG00000036114	PTDSS1 (2 of 2)	chr19:47834404-47863607	11.838	6.66088	-0.829642	0.0011	yes	13.6597	13.9067	0.0258521	0.9024	no	12.2059	14.9492	0.292487	0.2691	no	10.2517	6.78584	-0.595265	0.0068	yes	0.829642	-0.0258521	-0.292487	0.595265	yes	no	no	no
ENSDARG00000087178	ENSDARG00000087178	scpp9	chr1:44352316-44355588	27.1264	13.0858	-1.0517	0.0001	yes	54.3244	46.3041	-0.230459	0.25445	no	48.543	34.1584	-0.507023	0.03745	no	34.1403	13.3085	-1.35913	5e-05	yes	1.0517	0.230459	0.507023	1.35913	yes	no	no	yes
ENSDARG00000094696	ENSDARG00000094696	si:dkey-201c13.2	chr5:27723726-27738525	14.4271	7.5111	-0.941683	0.00175	yes	16.8286	23.2149	0.464138	0.0778	no	15.0376	18.2233	0.277202	0.33035	no	17.111	7.65925	-1.15965	0.00015	yes	0.941683	-0.464138	-0.277202	1.15965	yes	no	no	yes
ENSDARG00000058606	ENSDARG00000058606	SIK1	chr9:9169114-9178227	11.5342	6.11193	-0.916221	0.0023	yes	28.0009	23.46	-0.255271	0.30865	no	25.0208	14.5896	-0.778184	0.01535	no	17.288	6.22163	-1.47441	5e-05	yes	0.916221	0.255271	0.778184	1.47441	yes	no	no	yes
ENSDARG00000036865	ENSDARG00000036865	slc2a12	chr23:31846837-31871889	9.2854	18.95	1.02916	5e-05	yes	9.28707	12.5142	0.430271	0.09165	no	8.29874	11.7388	0.500326	0.0683	no	9.22398	19.3036	1.06541	5e-05	yes	-1.02916	-0.430271	-0.500326	-1.06541	yes	no	no	yes
ENSDARG00000006137	ENSDARG00000006137	star	chr8:46833050-46837134	0.878052	2.10956	1.26457	0.0001	yes	1.11397	0.39394	-1.49966	1	no	0.995429	1.11034	0.157614	1	no	0.290271	2.14591	2.88612	5e-05	yes	-1.26457	1.49966	-0.157614	-2.88612	yes	no	no	yes
ENSDARG00000028275	ENSDARG00000028275	sult1st1	chr8:48652960-48663057	33.9455	16.1565	-1.07111	5e-05	yes	55.4585	41.6366	-0.413555	0.0328	no	49.5559	42.7534	-0.21302	0.3735	no	30.6898	16.4718	-0.897761	5e-05	yes	1.07111	0.413555	0.21302	0.897761	yes	no	no	yes
ENSDARG00000011400	ENSDARG00000011400	tnnc1a	chr23:4946408-4951592	7.64217	2.76437	-1.46703	5e-05	yes	7.68918	9.14917	0.250812	0.33155	no	6.87081	9.64855	0.489831	0.05545	no	6.75036	2.82194	-1.25827	0.0002	yes	1.46703	-0.250812	-0.489831	1.25827	yes	no	no	yes
ENSDARG00000052708	ENSDARG00000052708	tnni1b	chr6:54780502-54799708	8.85952	4.65609	-0.928111	0.0005	yes	13.8902	12.7052	-0.128652	0.6126	no	12.4119	11.1767	-0.151222	0.5622	no	9.37085	4.74708	-0.981139	0.00055	yes	0.928111	0.128652	0.151222	0.981139	yes	no	no	yes
ENSDARG00000020610	ENSDARG00000020610	tnnt2a	chr23:5703089-5735038	21.0053	9.95737	-1.07691	5e-05	yes	21.7332	25.5391	0.23281	0.3094	no	19.42	26.5344	0.450317	0.06015	no	18.8399	10.1543	-0.891692	0.00025	yes	1.07691	-0.23281	-0.450317	0.891692	yes	no	no	yes
ENSDARG00000087515	ENSDARG00000087515	TRAF3IP2	chr20:3443309-3455196	5.98689	2.86724	-1.06214	0.0001	yes	10.9439	7.35939	-0.57247	0.0226	no	9.77913	7.57831	-0.367832	0.16495	no	5.42387	2.92202	-0.892356	0.00185	yes	1.06214	0.57247	0.367832	0.892356	yes	no	no	yes
ENSDARG00000030177	ENSDARG00000030177	uchl3	chr9:23004604-23010015	19.3274	10.2689	-0.912364	5e-05	yes	27.7302	21.1838	-0.388495	0.06575	no	24.779	24.3619	-0.0244934	0.9184	no	15.6143	10.465	-0.57729	0.00865	yes	0.912364	0.388495	0.0244934	0.57729	yes	no	no	no
ENSDARG00000070827	ENSDARG00000070827	zgc:112242	chr25:20605111-20610535	0.105705	3.69681	5.12817	5e-05	yes	0.243113	1.15	2.24193	1	no	0.217241	0.133475	-0.702728	1	no	0.84767	3.77107	2.1534	5e-05	yes	-5.12817	-2.24193	0.702728	-2.1534	yes	no	no	yes
ENSDARG00000070242	ENSDARG00000070242	zgc:171534	chr13:170972-173786	4.72422	10.1551	1.10406	5e-05	yes	5.87073	7.57567	0.367834	0.0931	no	5.24585	5.95982	0.184091	0.45635	no	5.58444	10.3578	0.89124	5e-05	yes	-1.10406	-0.367834	-0.184091	-0.89124	yes	no	no	yes
ENSDARG00000070565	ENSDARG00000070565	ADAP2	chr3:26753545-26767382	5.66317	3.07426	-0.881369	0.0014	yes	7.30165	6.59795	-0.146206	0.5831	no	6.52453	7.14808	0.131682	0.63725	no	4.86344	3.13085	-0.635426	0.02395	no	0.881369	0.146206	-0.131682	0.635426	yes	no	no	no
ENSDARG00000028087	ENSDARG00000028087	aldh2.2	chr5:72463281-72486869	0.683815	2.04889	1.58316	5e-05	yes	0.291347	0.743224	1.35106	1	no	0.260333	0.866573	1.73496	1	no	0.547836	2.08481	1.9281	1	no	-1.58316	-1.35106	-1.73496	-1.9281	yes	no	no	no
ENSDARG00000070055	ENSDARG00000070055	arfip1	chr1:24298451-24343971	37.4295	20.4787	-0.870052	0.0004	yes	43.0597	34.3785	-0.324834	0.1265	no	38.477	47.3155	0.298318	0.25605	no	25.338	20.8594	-0.280604	0.17185	no	0.870052	0.324834	-0.298318	0.280604	yes	no	no	no
ENSDARG00000063076	ENSDARG00000063076	atrip	chr22:10653478-10669910	5.95716	2.91851	-1.02939	0.00065	yes	5.22438	4.19253	-0.31744	0.3526	no	4.66835	7.53016	0.689768	0.0204	no	3.09215	2.97413	-0.056143	0.8745	no	1.02939	0.31744	-0.689768	0.056143	yes	no	no	no
ENSDARG00000055550	ENSDARG00000055550	CABZ01041682.1	chr21:8033542-8038310	6.44982	3.22606	-0.999487	0.0003	yes	7.7719	6.39833	-0.280571	0.3188	no	6.94474	8.15404	0.231594	0.40225	no	4.7156	3.28719	-0.520585	0.07625	no	0.999487	0.280571	-0.231594	0.520585	yes	no	no	no
ENSDARG00000086850	ENSDARG00000086850	CABZ01089385.1	chr11:46388930-46392159	5.72318	2.56392	-1.15847	0.00265	yes	5.22322	3.56269	-0.551975	0.2165	no	4.66732	7.2303	0.631463	0.08995	no	2.62524	2.60789	-0.00956365	1	no	1.15847	0.551975	-0.631463	0.00956365	yes	no	no	no
ENSDARG00000020103	ENSDARG00000020103	calrl	chr2:55840230-55854933	73.9581	39.9186	-0.889645	0.00025	yes	69.2421	59.3772	-0.22174	0.2447	no	61.8728	93.1938	0.59093	0.0245	no	43.77	40.688	-0.10534	0.5821	no	0.889645	0.22174	-0.59093	0.10534	yes	no	no	no
ENSDARG00000035560	ENSDARG00000035560	CAPG (1 of 2)	chr5:25785812-25793053	4.84898	2.57779	-0.911547	0.00075	yes	5.43312	5.08449	-0.0956764	0.7253	no	4.85486	6.1201	0.334125	0.22145	no	3.74735	2.62771	-0.512062	0.0691	no	0.911547	0.0956764	-0.334125	0.512062	yes	no	no	no
ENSDARG00000061432	ENSDARG00000061432	CR759791.1	chr22:27136129-27139966	2.47762	0.675371	-1.8752	5e-05	yes	2.15981	0.832682	-1.37507	1	no	1.92995	3.13252	0.698759	0.02645	no	0.613839	0.687828	0.16419	1	no	1.8752	1.37507	-0.698759	-0.16419	yes	no	no	no
ENSDARG00000054026	ENSDARG00000054026	CR847954.1	chr6:40772133-40773355	16.3063	4.08093	-1.99846	0.00065	yes	26.8471	16.6841	-0.686289	0.13105	no	23.99	20.5524	-0.223126	0.57005	no	12.3006	4.14775	-1.56833	1	no	1.99846	0.686289	0.223126	1.56833	yes	no	no	no
ENSDARG00000069017	ENSDARG00000069017	elnb	chr21:39488347-39528844	2.21376	0.941635	-1.23326	5e-05	yes	2.09084	2.51118	0.264285	0.2669	no	1.86833	2.793	0.580066	0.01945	no	1.85297	0.96036	-0.94819	1	no	1.23326	-0.264285	-0.580066	0.94819	yes	no	no	no
ENSDARG00000015247	ENSDARG00000015247	f8	chr14:1005560-1038983	2.43508	0.635865	-1.93717	5e-05	yes	2.9793	1.99249	-0.580399	0.0225	no	2.66222	3.07551	0.208198	0.3966	no	1.47022	0.649225	-1.17924	1	no	1.93717	0.580399	-0.208198	1.17924	yes	no	no	no
ENSDARG00000078283	ENSDARG00000078283	LRRC8E	chr6:61792-66291	6.07257	3.15402	-0.945116	5e-05	yes	6.84768	4.88784	-0.486419	0.02595	no	6.11896	7.66355	0.324727	0.16995	no	3.60281	3.21051	-0.166319	0.46515	no	0.945116	0.486419	-0.324727	0.166319	yes	no	no	no
ENSDARG00000011615	ENSDARG00000011615	mybpc3	chr7:33172829-33233718	2.69632	0.846136	-1.67203	5e-05	yes	3.63002	2.73149	-0.410286	0.20585	no	3.2438	3.40325	0.069227	0.8246	no	2.01571	0.862815	-1.22416	1	no	1.67203	0.410286	-0.069227	1.22416	yes	no	no	no
ENSDARG00000033735	ENSDARG00000033735	ncf1	chr5:64495159-64508316	33.8876	16.3744	-1.04932	5e-05	yes	39.7539	31.4014	-0.340267	0.07655	no	35.523	42.8409	0.270234	0.2414	no	23.1429	16.6875	-0.471807	0.0165	no	1.04932	0.340267	-0.270234	0.471807	yes	no	no	no
ENSDARG00000030616	ENSDARG00000030616	nfe2l1a	chr3:24362910-24384385	5.97927	3.05686	-0.96792	0.00035	yes	6.6368	5.40695	-0.295673	0.1688	no	5.93052	7.58182	0.354387	0.1797	no	3.98354	3.11107	-0.356639	0.1037	no	0.96792	0.295673	-0.354387	0.356639	yes	no	no	no
ENSDARG00000029014	ENSDARG00000029014	orc4	chr6:1422820-1436521	4.30558	1.46977	-1.55061	5e-05	yes	7.10447	3.88279	-0.871632	0.05005	no	6.34833	5.44773	-0.220722	0.52825	no	2.86393	1.49841	-0.934562	0.0371	no	1.55061	0.871632	0.220722	0.934562	yes	no	no	no
ENSDARG00000054319	ENSDARG00000054319	oxct1b	chr21:19598956-19613763	11.7544	20.8605	0.827575	5e-05	yes	23.0726	24.3699	0.0789165	0.687	no	20.6172	14.8428	-0.474087	0.04085	no	17.9657	21.2479	0.242075	0.2058	no	-0.827575	-0.0789165	0.474087	-0.242075	yes	no	no	no
ENSDARG00000014704	ENSDARG00000014704	pgm2l1	chr15:4975158-5007591	2.89706	1.05817	-1.45301	5e-05	yes	2.62321	2.06932	-0.342175	0.19475	no	2.34402	3.6659	0.645179	0.01645	no	1.52515	1.07784	-0.500808	1	no	1.45301	0.342175	-0.645179	0.500808	yes	no	no	no
ENSDARG00000090444	ENSDARG00000090444	ponzr1	chr7:21501627-21527465	88.5138	48.8895	-0.856379	5e-05	yes	115.367	82.5123	-0.483556	0.0139	no	103.089	111.806	0.117108	0.61245	no	60.8103	49.8228	-0.287509	0.14555	no	0.856379	0.483556	-0.117108	0.287509	yes	no	no	no
ENSDARG00000056875	ENSDARG00000056875	rgs2	chr22:23559999-23562207	9.85617	5.39129	-0.870397	0.0003	yes	13.5154	10.8577	-0.315885	0.20515	no	12.077	12.4361	0.0422732	0.87195	no	8.00088	5.49223	-0.542766	0.03525	no	0.870397	0.315885	-0.0422732	0.542766	yes	no	no	no
ENSDARG00000078193	ENSDARG00000078193	si:ch211-67e16.3	chr9:14287054-14296006	2.59823	0.690281	-1.91228	5e-05	yes	2.16646	0.752122	-1.5263	1	no	1.93595	3.2819	0.761494	0.0142	no	0.554501	0.703159	0.34266	1	no	1.91228	1.5263	-0.761494	-0.34266	yes	no	no	no
ENSDARG00000091926	ENSDARG00000091926	si:dkey-103e21.5	chr5:24368836-24374067	11.1849	6.16621	-0.859098	0.00015	yes	12.5202	10.26	-0.287222	0.2032	no	11.1876	14.1493	0.338829	0.1665	no	7.56323	6.27863	-0.268553	0.24855	no	0.859098	0.287222	-0.338829	0.268553	yes	no	no	no
ENSDARG00000094089	ENSDARG00000094089	si:dkey-236e20.1	chr22:15455710-15457528	3.92958	7.13226	0.859986	0.0023	yes	0.0559021	0.0853185	0.609956	1	no	0.0499517	4.9515	6.63119	0.0252	no	0.0629246	7.26998	6.85218	0.08135	no	-0.859986	-0.609956	-6.63119	-6.85218	yes	no	no	no
ENSDARG00000042807	ENSDARG00000042807	slc16a4	chr8:25597983-25632338	2.88579	5.81156	1.00996	5e-05	yes	5.75869	8.02672	0.479071	0.02365	no	5.14583	3.64673	-0.496799	0.04045	no	5.91685	5.91859	0.000423749	0.99865	no	-1.00996	-0.479071	0.496799	-0.000423749	yes	no	no	no
ENSDARG00000036868	ENSDARG00000036868	tbpl1	chr23:31835019-31843886	2.64822	4.70576	0.829402	0.00075	yes	3.93859	4.8665	0.305205	0.23655	no	3.51941	3.34382	-0.0738359	0.78625	no	3.58685	4.79643	0.419245	0.08125	no	-0.829402	-0.305205	0.0738359	-0.419245	yes	no	no	no
ENSDARG00000037345	ENSDARG00000037345	THEM6 (1 of 2)	chr2:52321433-52327464	3.17717	1.19746	-1.40776	5e-05	yes	4.05045	2.47327	-0.711662	0.0203	no	3.61938	4.00507	0.146084	0.617	no	1.82301	1.22043	-0.578929	1	no	1.40776	0.711662	-0.146084	0.578929	yes	no	no	no
ENSDARG00000037966	ENSDARG00000037966	thoc6	chr3:32788672-32795412	2.48482	0.999883	-1.31331	5e-05	yes	4.33818	2.58112	-0.749092	0.0141	no	3.87646	3.13557	-0.306013	0.3023	no	1.90273	1.01865	-0.901416	1	no	1.31331	0.749092	0.306013	0.901416	yes	no	no	no
ENSDARG00000042214	ENSDARG00000042214	tmem243a	chr18:8376715-8380603	1.48816	4.57252	1.61946	5e-05	yes	2.7711	4.2014	0.600412	0.0685	no	2.47619	1.88422	-0.394159	0.25245	no	3.09846	4.6578	0.588096	0.0474	no	-1.61946	-0.600412	0.394159	-0.588096	yes	no	no	no
ENSDARG00000088536	ENSDARG00000088536	VAV1 (1 of 2)	chr1:59781899-59786479	4.27339	2.05348	-1.05731	0.00085	yes	4.47935	3.26968	-0.454139	0.1763	no	4.00266	5.39644	0.431049	0.1644	no	2.40979	2.09279	-0.203482	1	no	1.05731	0.454139	-0.431049	0.203482	yes	no	no	no
ENSDARG00000015998	ENSDARG00000015998	wdhd1	chr17:14991017-15030636	2.02559	0.596909	-1.76276	5e-05	yes	2.58771	1.18465	-1.12721	0.01325	no	2.31231	2.56	0.146809	0.75425	no	0.873314	0.608057	-0.522293	1	no	1.76276	1.12721	-0.146809	0.522293	yes	no	no	no
ENSDARG00000095147	ENSDARG00000095147	wu:fb17f05	chr22:11885418-11889710	3.02636	1.61886	-0.902608	0.0022	yes	2.83244	2.53601	-0.159485	0.5984	no	2.53095	3.83756	0.600509	0.0532	no	1.87024	1.64821	-0.182326	1	no	0.902608	0.159485	-0.600509	0.182326	yes	no	no	no
ENSDARG00000009494	ENSDARG00000009494	xrcc1	chr16:57735785-57772473	2.40569	4.91681	1.03127	5e-05	yes	4.08828	5.19789	0.34643	0.12425	no	3.65317	3.04205	-0.264106	0.2935	no	3.83078	5.01155	0.387618	0.0781	no	-1.03127	-0.34643	0.264106	-0.387618	yes	no	no	no
ENSDARG00000013525	ENSDARG00000013525	zgc:153650	chr1:58029342-58041628	123.689	62.8143	-0.977552	5e-05	yes	134.811	107.722	-0.323627	0.08955	no	120.464	156.315	0.375858	0.1118	no	79.3942	64.0101	-0.310734	0.0978	no	0.977552	0.323627	-0.375858	0.310734	yes	no	no	no
ENSDARG00000052779	ENSDARG00000052779	zgc:153932	chr12:47074447-47100259	2.04858	1.06292	-0.946587	0.0003	yes	2.96608	2.61712	-0.180582	0.4818	no	2.65038	2.58684	-0.0350039	0.8964	no	1.92753	1.08248	-0.832419	1	no	0.946587	0.180582	0.0350039	0.832419	yes	no	no	no
ENSDARG00000079255	ENSDARG00000079255	zgc:174935	chr16:19774277-19776922	7.36408	4.01924	-0.873581	0.00035	yes	9.0383	7.04382	-0.359694	0.1186	no	8.07622	9.31026	0.20514	0.4105	no	5.1932	4.0884	-0.345088	0.14595	no	0.873581	0.359694	-0.20514	0.345088	yes	no	no	no
ENSDARG00000021086	ENSDARG00000021086	znf367	chr8:1279136-1288484	2.05547	0.775051	-1.40711	5e-05	yes	2.89262	1.8261	-0.66361	0.03515	no	2.58474	2.60071	0.00888354	0.97555	no	1.34605	0.790075	-0.768674	1	no	1.40711	0.66361	-0.00888354	0.768674	yes	no	no	no
ENSDARG00000052899	ENSDARG00000052899	CU550714.1	chr1:41133786-41134998	2.81336	0	#NAME?	1	no	11.9881	1.3697	-3.12967	5e-05	yes	10.7125	3.55425	-1.59167	5e-05	yes	1.0087	0	#NAME?	1	no	#NAME?	3.12967	1.59167	#NAME?	no	yes	yes	no
ENSDARG00000052900	ENSDARG00000052900	zgc:153642	chr1:41130700-41132161	1.24694	0	#NAME?	1	no	5.03161	0.458082	-3.45734	5e-05	yes	4.4962	1.57603	-1.51242	5e-05	yes	0.337288	0	#NAME?	1	no	#NAME?	3.45734	1.51242	#NAME?	no	yes	yes	no
ENSDARG00000091085	ENSDARG00000091085	lepa	chr18:10137807-10138401	0.127983	0	#NAME?	1	no	3.84432	0.0408612	-6.55585	0.2529	no	3.43522	0.16112	-4.41419	0.0088	yes	0.0300743	0	#NAME?	1	no	#NAME?	6.55585	4.41419	#NAME?	no	no	yes	no
ENSDARG00000082607	ENSDARG00000082607	SNORD21	chr6:28800389-28811189	0	15.5391	inf	1	no	8.41343	0	#NAME?	1	no	7.51764	0	#NAME?	0.00165	yes	0	15.8743	inf	1	no	#VALUE!	#NAME?	#NAME?	#VALUE!	no	no	no	no
ENSDARG00000093042	ENSDARG00000093042	si:dkey-104n9.1	chr8:13360831-13365015	0.0141088	0	#NAME?	1	no	1.62004	22.8198	3.81618	5e-05	yes	1.44763	0.0177234	-6.3519	1	no	16.8206	0	#NAME?	5e-05	yes	#NAME?	-3.81618	6.3519	#NAME?	no	yes	no	no
ENSDARG00000070224	ENSDARG00000070224	-	chr23:41555121-41555796	0	0.0192782	inf	1	no	0.0278038	0	#NAME?	1	no	0.0248435	0	#NAME?	1	no	0	0.0195472	inf	1	no	#VALUE!	#NAME?	#NAME?	#VALUE!	no	no	no	no
ENSDARG00000082828	ENSDARG00000082828	5_8S_rRNA	chr1:3370511-3370666	0	0.664498	inf	1	no	0	0	0	1	no	0	0	0	1	no	0	0.67942	inf	1	no	#VALUE!	0	0	#VALUE!	no	no	no	no
ENSDARG00000080031	ENSDARG00000080031	5S_rRNA	chr17:20531734-20727560	1.66682	0	#NAME?	1	no	0	0	0	1	no	0	2.0984	inf	1	no	0	0	0	1	no	#NAME?	0	#VALUE!	0	no	no	no	no
ENSDARG00000080039	ENSDARG00000080039	5S_rRNA	chr21:41246235-41246351	0	2.12785	inf	1	no	0	0	0	1	no	0	0	0	1	no	0	2.17564	inf	1	no	#VALUE!	0	0	#VALUE!	no	no	no	no
ENSDARG00000080044	ENSDARG00000080044	5S_rRNA	chr11:35193070-35193189	0	1.91115	inf	1	no	0	0	0	1	no	0	0	0	1	no	0	1.95407	inf	1	no	#VALUE!	0	0	#VALUE!	no	no	no	no
ENSDARG00000080218	ENSDARG00000080218	5S_rRNA	chr21:1071551-1092450	3.07449	0	#NAME?	0.17195	no	2.23159	0	#NAME?	1	no	1.99399	3.89269	0.965113	0.2282	no	0	0	0	1	no	#NAME?	#NAME?	-0.965113	0	no	no	no	no
ENSDARG00000080223	ENSDARG00000080223	5S_rRNA	chr5:24870304-24900159	1.48578	0	#NAME?	1	no	2.39222	0	#NAME?	1	no	2.13752	1.86625	-0.195794	0.73645	no	0	0	0	1	no	#NAME?	#NAME?	0.195794	0	no	no	no	no
ENSDARG00000080227	ENSDARG00000080227	5S_rRNA	chr20:51546642-51546759	0	4.31735	inf	1	no	0	0	0	1	no	0	0	0	1	no	0	4.40829	inf	1	no	#VALUE!	0	0	#VALUE!	no	no	no	no
ENSDARG00000080246	ENSDARG00000080246	5S_rRNA	chr8:31007370-31164478	0	1.71878	inf	1	no	0	0	0	1	no	0	0	0	1	no	0	1.7428	inf	1	no	#VALUE!	0	0	#VALUE!	no	no	no	no
ENSDARG00000080309	ENSDARG00000080309	5S_rRNA	chr25:17128846-17128964	0	2.18557	inf	1	no	0	0	0	1	no	0	0	0	1	no	0	2.22885	inf	1	no	#VALUE!	0	0	#VALUE!	no	no	no	no
ENSDARG00000080472	ENSDARG00000080472	5S_rRNA	chr17:6859107-6859228	0	1.78282	inf	1	no	0	0	0	1	no	0	0	0	1	no	0	1.82285	inf	1	no	#VALUE!	0	0	#VALUE!	no	no	no	no
ENSDARG00000080569	ENSDARG00000080569	5S_rRNA	chr5:26063968-26064087	0	1.65868	inf	1	no	0	0	0	1	no	0	0	0	1	no	0	1.68183	inf	1	no	#VALUE!	0	0	#VALUE!	no	no	no	no
ENSDARG00000080697	ENSDARG00000080697	5S_rRNA	chr24:43644186-43644303	1.74914	0	#NAME?	1	no	0	0	0	1	no	0	2.22753	inf	1	no	0	0	0	1	no	#NAME?	0	#VALUE!	0	no	no	no	no
ENSDARG00000080732	ENSDARG00000080732	5S_rRNA	chr6:40853435-40878535	0	1.91115	inf	1	no	0	3.19301	inf	0.23985	no	0	0	0	1	no	2.35009	1.95407	-0.266239	0.7821	no	#VALUE!	#VALUE!	0	0.266239	no	no	no	no
ENSDARG00000080781	ENSDARG00000080781	5S_rRNA	chr11:28388116-28414501	0	2.18558	inf	1	no	0	0	0	1	no	0	0	0	1	no	0	2.22886	inf	1	no	#VALUE!	0	0	#VALUE!	no	no	no	no
ENSDARG00000080791	ENSDARG00000080791	5S_rRNA	chr22:978027-1002624	0	1.91577	inf	1	no	0	0	0	1	no	0	0	0	1	no	0	1.9425	inf	1	no	#VALUE!	0	0	#VALUE!	no	no	no	no
ENSDARG00000080869	ENSDARG00000080869	5S_rRNA	chr20:32473508-32473626	1.68763	0	#NAME?	1	no	0	0	0	1	no	0	2.14919	inf	1	no	0	0	0	1	no	#NAME?	0	#VALUE!	0	no	no	no	no
ENSDARG00000080998	ENSDARG00000080998	5S_rRNA	chr25:17331000-17595838	1.31664	0	#NAME?	1	no	0	0	0	1	no	0	1.65737	inf	1	no	0	0	0	1	no	#NAME?	0	#VALUE!	0	no	no	no	no
ENSDARG00000081067	ENSDARG00000081067	5S_rRNA	chr9:45978150-46020732	0	1.65868	inf	1	no	2.39222	0	#NAME?	1	no	2.13752	0	#NAME?	1	no	0	1.68183	inf	1	no	#VALUE!	#NAME?	#NAME?	#VALUE!	no	no	no	no
ENSDARG00000081096	ENSDARG00000081096	5S_rRNA	chr8:52277058-52277180	0	1.49535	inf	1	no	0	6.93808	inf	1	no	0	0	0	1	no	5.12137	1.51621	-1.75606	1	no	#VALUE!	#VALUE!	0	1.75606	no	no	no	no
ENSDARG00000081177	ENSDARG00000081177	5S_rRNA	chr21:23979870-24143175	0	1.97996	inf	1	no	0	0	0	1	no	0	0	0	1	no	0	2.02442	inf	1	no	#VALUE!	0	0	#VALUE!	no	no	no	no
ENSDARG00000081240	ENSDARG00000081240	5S_rRNA	chr4:7494279-7627025	0	1.90186	inf	1	no	0	0	0	1	no	0	0	0	1	no	0	1.93953	inf	1	no	#VALUE!	0	0	#VALUE!	no	no	no	no
ENSDARG00000081259	ENSDARG00000081259	5S_rRNA	Zv9_scaffold3519:160782-172154	1.48501	0	#NAME?	1	no	0	0	0	1	no	0	1.86546	inf	1	no	0	0	0	1	no	#NAME?	0	#VALUE!	0	no	no	no	no
ENSDARG00000081658	ENSDARG00000081658	5S_rRNA	chr5:56102820-56102942	2.97124	0	#NAME?	1	no	0	2.87858	inf	1	no	0	3.76198	inf	1	no	2.11867	0	#NAME?	1	no	#NAME?	#VALUE!	#VALUE!	#NAME?	no	no	no	no
ENSDARG00000081749	ENSDARG00000081749	5S_rRNA	chr12:14758491-14827956	1.29431	0	#NAME?	1	no	0	0	0	1	no	0	1.62591	inf	1	no	0	0	0	1	no	#NAME?	0	#VALUE!	0	no	no	no	no
ENSDARG00000081824	ENSDARG00000081824	5S_rRNA	chr22:17536082-17678544	0	3.56984	inf	1	no	0	0	0	1	no	0	0	0	1	no	0	3.6359	inf	1	no	#VALUE!	0	0	#VALUE!	no	no	no	no
ENSDARG00000081880	ENSDARG00000081880	5S_rRNA	chr7:44443548-44550988	1.48501	0	#NAME?	1	no	2.39223	0	#NAME?	1	no	2.13752	1.86546	-0.196407	1	no	0	0	0	1	no	#NAME?	#NAME?	0.196407	0	no	no	no	no
ENSDARG00000081967	ENSDARG00000081967	5S_rRNA	chr6:47217866-47217985	1.48501	0	#NAME?	1	no	0	0	0	1	no	0	1.86546	inf	1	no	0	0	0	1	no	#NAME?	0	#VALUE!	0	no	no	no	no
ENSDARG00000081976	ENSDARG00000081976	5S_rRNA	chr6:49047647-49099807	0	1.3093	inf	1	no	0	2.52044	inf	0.2404	no	0	0	0	1	no	1.85507	1.32757	-0.482688	1	no	#VALUE!	#VALUE!	0	0.482688	no	no	no	no
ENSDARG00000082003	ENSDARG00000082003	5S_rRNA	chr25:37871531-37871654	0	1.66573	inf	1	no	0	0	0	1	no	0	0	0	1	no	0	1.70314	inf	1	no	#VALUE!	0	0	#VALUE!	no	no	no	no
ENSDARG00000082113	ENSDARG00000082113	5S_rRNA	chr22:12780872-12833130	0	2.21903	inf	0.2305	no	2.38605	8.72307	1.87021	0.5492	no	2.13201	0	#NAME?	0.17715	no	6.43133	2.25124	-1.5144	0.61085	no	#VALUE!	-1.87021	#NAME?	1.5144	no	no	no	no
ENSDARG00000082126	ENSDARG00000082126	5S_rRNA	chr3:54325673-54360060	1.62898	0	#NAME?	1	no	0	0	0	1	no	0	2.0745	inf	1	no	0	0	0	1	no	#NAME?	0	#VALUE!	0	no	no	no	no
ENSDARG00000082439	ENSDARG00000082439	5S_rRNA	chr19:37663205-38223383	0	1.71843	inf	1	no	0	0	0	1	no	0	0	0	1	no	0	1.74241	inf	1	no	#VALUE!	0	0	#VALUE!	no	no	no	no
ENSDARG00000082551	ENSDARG00000082551	5S_rRNA	chr16:1216460-1216577	0	1.78104	inf	1	no	0	0	0	1	no	0	0	0	1	no	0	1.80589	inf	1	no	#VALUE!	0	0	#VALUE!	no	no	no	no
ENSDARG00000082878	ENSDARG00000082878	5S_rRNA	chr15:25633435-25633554	0	1.91115	inf	1	no	0	0	0	1	no	0	0	0	1	no	0	1.95407	inf	1	no	#VALUE!	0	0	#VALUE!	no	no	no	no
ENSDARG00000083014	ENSDARG00000083014	5S_rRNA	chr1:48199030-48268849	1.72684	0	#NAME?	1	no	2.4348	3.30798	0.442149	0.54055	no	2.17576	2.17396	-0.00119725	0.63795	no	2.43471	0	#NAME?	0.187	no	#NAME?	-0.442149	0.00119725	#NAME?	no	no	no	no
ENSDARG00000083285	ENSDARG00000083285	5S_rRNA	chr21:27873056-27896664	1.53848	0	#NAME?	1	no	0	7.97308	inf	1	no	0	1.93263	inf	1	no	5.88537	0	#NAME?	1	no	#NAME?	#VALUE!	#VALUE!	#NAME?	no	no	no	no
ENSDARG00000083339	ENSDARG00000083339	5S_rRNA	chr21:28496782-28504565	2.58882	0	#NAME?	1	no	0	0	0	1	no	0	3.25201	inf	1	no	0	0	0	1	no	#NAME?	0	#VALUE!	0	no	no	no	no
ENSDARG00000083345	ENSDARG00000083345	5S_rRNA	chr21:39719635-39770250	4.59408	0	#NAME?	0.24475	no	0	7.17916	inf	1	no	0	5.82789	inf	0.18585	no	5.29933	0	#NAME?	1	no	#NAME?	#VALUE!	#VALUE!	#NAME?	no	no	no	no
ENSDARG00000083372	ENSDARG00000083372	5S_rRNA	Zv9_NA995:110740-110861	0	1.96795	inf	1	no	2.23159	0	#NAME?	1	no	1.99399	0	#NAME?	1	no	0	2.00692	inf	1	no	#VALUE!	#NAME?	#NAME?	#VALUE!	no	no	no	no
ENSDARG00000083647	ENSDARG00000083647	5S_rRNA	chr15:13555481-13566978	0	8.09253	inf	0.24605	no	2.52354	21.2745	3.07561	0.49365	no	2.25506	0	#NAME?	1	no	15.6672	8.23195	-0.928439	0.66515	no	#VALUE!	-3.07561	#NAME?	0.928439	no	no	no	no
ENSDARG00000083731	ENSDARG00000083731	5S_rRNA	chr12:30898859-31172799	0	2.26523	inf	1	no	0	0	0	1	no	0	0	0	1	no	0	2.31008	inf	1	no	#VALUE!	0	0	#VALUE!	no	no	no	no
ENSDARG00000083749	ENSDARG00000083749	5S_rRNA	chr19:12652960-12700534	0	2.05213	inf	1	no	2.56869	0	#NAME?	1	no	2.2952	0	#NAME?	0.17795	no	0	2.09821	inf	1	no	#VALUE!	#NAME?	#NAME?	#VALUE!	no	no	no	no
ENSDARG00000083794	ENSDARG00000083794	5S_rRNA	chr7:15158461-15158594	1.05666	0	#NAME?	1	no	0	0	0	1	no	0	1.33026	inf	1	no	0	0	0	1	no	#NAME?	0	#VALUE!	0	no	no	no	no
ENSDARG00000083808	ENSDARG00000083808	5S_rRNA	chr18:2490212-2490329	0	1.78104	inf	1	no	0	0	0	1	no	0	0	0	1	no	0	1.80589	inf	1	no	#VALUE!	0	0	#VALUE!	no	no	no	no
ENSDARG00000083903	ENSDARG00000083903	5S_rRNA	chr10:11105113-11227461	0	1.84676	inf	1	no	0	0	0	1	no	0	0	0	1	no	0	1.87253	inf	1	no	#VALUE!	0	0	#VALUE!	no	no	no	no
ENSDARG00000083921	ENSDARG00000083921	5S_rRNA	chr6:4416629-4416765	0.966387	0	#NAME?	1	no	0	0	0	1	no	0	1.21661	inf	1	no	0	0	0	1	no	#NAME?	0	#VALUE!	0	no	no	no	no
ENSDARG00000083922	ENSDARG00000083922	5S_rRNA	chr17:23052174-23062082	1.78978	0	#NAME?	1	no	2.56869	6.85709	1.41657	0.55155	no	2.2952	2.25319	-0.0266461	0.653	no	5.0469	0	#NAME?	0.1862	no	#NAME?	-1.41657	0.0266461	#NAME?	no	no	no	no
ENSDARG00000083939	ENSDARG00000083939	5S_rRNA	chr16:7042612-7129709	1.79081	0	#NAME?	1	no	0	0	0	1	no	0	2.25423	inf	0.1716	no	0	0	0	1	no	#NAME?	0	#VALUE!	0	no	no	no	no
ENSDARG00000083948	ENSDARG00000083948	5S_rRNA	chr4:7225715-7335653	1.59455	0	#NAME?	1	no	0	0	0	1	no	0	2.00306	inf	1	no	0	0	0	1	no	#NAME?	0	#VALUE!	0	no	no	no	no
ENSDARG00000083953	ENSDARG00000083953	5S_rRNA	chr3:36411373-36445884	0	1.78104	inf	1	no	0	0	0	1	no	0	0	0	1	no	0	1.80589	inf	1	no	#VALUE!	0	0	#VALUE!	no	no	no	no
ENSDARG00000083977	ENSDARG00000083977	5S_rRNA	chr13:6846632-6864424	3.30678	0	#NAME?	1	no	0	0	0	1	no	0	4.15396	inf	1	no	0	0	0	1	no	#NAME?	0	#VALUE!	0	no	no	no	no
ENSDARG00000083982	ENSDARG00000083982	5S_rRNA	chr7:19051977-19151607	0	2.1295	inf	1	no	5.28303	0	#NAME?	0.18405	no	4.72076	0	#NAME?	0.13925	no	0	2.1774	inf	0.1861	no	#VALUE!	#NAME?	#NAME?	#VALUE!	no	no	no	no
ENSDARG00000084014	ENSDARG00000084014	5S_rRNA	chr25:15289717-15409410	0	1.02036	inf	1	no	0	1.96423	inf	1	no	0	0	0	1	no	1.44569	1.0346	-0.482688	1	no	#VALUE!	#VALUE!	0	0.482688	no	no	no	no
ENSDARG00000084038	ENSDARG00000084038	5S_rRNA	chr4:17921004-18007522	1.71517	0	#NAME?	1	no	0	0	0	1	no	0	2.15459	inf	1	no	0	0	0	1	no	#NAME?	0	#VALUE!	0	no	no	no	no
ENSDARG00000084040	ENSDARG00000084040	5S_rRNA	chr16:23526791-23573992	0	1.32861	inf	1	no	1.63487	0	#NAME?	1	no	1.46102	0	#NAME?	1	no	0	1.35845	inf	1	no	#VALUE!	#NAME?	#NAME?	#VALUE!	no	no	no	no
ENSDARG00000084065	ENSDARG00000084065	5S_rRNA	chr17:7065607-7190007	0	1.77832	inf	1	no	0	0	0	1	no	0	0	0	1	no	0	1.81353	inf	1	no	#VALUE!	0	0	#VALUE!	no	no	no	no
ENSDARG00000084123	ENSDARG00000084123	5S_rRNA	chr17:22590140-22777132	0	1.18953	inf	1	no	0	0	0	1	no	0	0	0	1	no	0	1.20613	inf	1	no	#VALUE!	0	0	#VALUE!	no	no	no	no
ENSDARG00000084136	ENSDARG00000084136	5S_rRNA	chr7:14167362-14167488	0	1.66524	inf	1	no	0	0	0	1	no	0	0	0	1	no	0	1.69822	inf	1	no	#VALUE!	0	0	#VALUE!	no	no	no	no
ENSDARG00000084166	ENSDARG00000084166	5S_rRNA	chr12:24999706-24999832	1.28585	0	#NAME?	1	no	0	0	0	1	no	0	1.63753	inf	1	no	0	0	0	1	no	#NAME?	0	#VALUE!	0	no	no	no	no
ENSDARG00000084206	ENSDARG00000084206	5S_rRNA	chr5:31794850-31815987	1.78978	0	#NAME?	1	no	0	0	0	1	no	0	2.25319	inf	0.18475	no	0	0	0	1	no	#NAME?	0	#VALUE!	0	no	no	no	no
ENSDARG00000084236	ENSDARG00000084236	5S_rRNA	chr18:18416983-18448127	1.35942	0	#NAME?	1	no	0	0	0	1	no	0	2.56711	inf	1	no	0	0	0	1	no	#NAME?	0	#VALUE!	0	no	no	no	no
ENSDARG00000084238	ENSDARG00000084238	5S_rRNA	chr23:31991182-32002332	0	1.78104	inf	1	no	0	4.13182	inf	1	no	0	0	0	1	no	3.04992	1.80589	-0.756061	1	no	#VALUE!	#VALUE!	0	0.756061	no	no	no	no
ENSDARG00000084240	ENSDARG00000084240	5S_rRNA	chr9:22463647-22493509	0	4.31735	inf	1	no	2.56869	0	#NAME?	1	no	2.2952	0	#NAME?	1	no	0	4.40829	inf	1	no	#VALUE!	#NAME?	#NAME?	#VALUE!	no	no	no	no
ENSDARG00000084275	ENSDARG00000084275	5S_rRNA	chr15:9122958-9123075	0	2.05213	inf	1	no	0	0	0	1	no	0	0	0	1	no	0	2.09821	inf	1	no	#VALUE!	0	0	#VALUE!	no	no	no	no
ENSDARG00000084279	ENSDARG00000084279	5S_rRNA	chr9:49443798-49716433	0.917274	0	#NAME?	1	no	0	0	0	1	no	0	1.16815	inf	1	no	0	0	0	1	no	#NAME?	0	#VALUE!	0	no	no	no	no
ENSDARG00000084312	ENSDARG00000084312	5S_rRNA	chr12:43371974-43420546	3.53892	0	#NAME?	0.24585	no	2.56869	4.13182	0.685746	1	no	2.2952	4.48072	0.965113	0.57835	no	3.04992	0	#NAME?	1	no	#NAME?	-0.685746	-0.965113	#NAME?	no	no	no	no
ENSDARG00000084315	ENSDARG00000084315	5S_rRNA	chr1:45037846-45046967	1.71517	0	#NAME?	1	no	2.763	0	#NAME?	1	no	2.46882	2.15459	-0.196409	0.78165	no	0	0	0	1	no	#NAME?	#NAME?	0.196409	0	no	no	no	no
ENSDARG00000084355	ENSDARG00000084355	5S_rRNA	chr13:30645073-30794461	0	1.78267	inf	1	no	2.52599	0	#NAME?	1	no	2.25739	0	#NAME?	1	no	0	1.80754	inf	1	no	#VALUE!	#NAME?	#NAME?	#VALUE!	no	no	no	no
ENSDARG00000084380	ENSDARG00000084380	5S_rRNA	chr10:11364006-11467320	0	4.04626	inf	0.2431	no	0	0	0	1	no	0	0	0	1	no	0	4.11597	inf	1	no	#VALUE!	0	0	#VALUE!	no	no	no	no
ENSDARG00000084386	ENSDARG00000084386	5S_rRNA	chr17:5777388-5777505	0	8.8478	inf	1	no	2.56869	4.13182	0.685746	1	no	2.2952	0	#NAME?	1	no	3.04992	9.02846	1.56571	1	no	#VALUE!	-0.685746	#NAME?	-1.56571	no	no	no	no
ENSDARG00000084399	ENSDARG00000084399	5S_rRNA	chr9:57237078-57237199	5.97937	0	#NAME?	1	no	2.19236	2.9786	0.442149	1	no	1.95912	7.56809	1.94972	1	no	2.19229	0	#NAME?	1	no	#NAME?	-0.442149	-1.94972	#NAME?	no	no	no	no
ENSDARG00000084441	ENSDARG00000084441	5S_rRNA	chr23:27816175-27830466	0	1.18953	inf	1	no	0	0	0	1	no	0	0	0	1	no	0	1.20613	inf	1	no	#VALUE!	0	0	#VALUE!	no	no	no	no
ENSDARG00000084471	ENSDARG00000084471	5S_rRNA	chr4:26426802-26444288	1.35942	0	#NAME?	1	no	1.91674	0	#NAME?	1	no	1.71282	1.7114	-0.00119725	1	no	0	0	0	1	no	#NAME?	#NAME?	0.00119725	0	no	no	no	no
ENSDARG00000084475	ENSDARG00000084475	5S_rRNA	chr13:29148447-29148567	0	1.84549	inf	1	no	0	0	0	1	no	0	0	0	1	no	0	1.88694	inf	1	no	#VALUE!	0	0	#VALUE!	no	no	no	no
ENSDARG00000084478	ENSDARG00000084478	5S_rRNA	chr24:22567941-22581406	3.53892	0	#NAME?	1	no	0	3.42855	inf	1	no	0	4.48072	inf	1	no	2.52345	0	#NAME?	1	no	#NAME?	#VALUE!	#VALUE!	#NAME?	no	no	no	no
ENSDARG00000084489	ENSDARG00000084489	5S_rRNA	chr22:37974563-38010188	0	2.05213	inf	1	no	0	0	0	1	no	0	0	0	1	no	0	2.09821	inf	1	no	#VALUE!	0	0	#VALUE!	no	no	no	no
ENSDARG00000084495	ENSDARG00000084495	5S_rRNA	chr6:37391196-37408083	0	3.69352	inf	1	no	5.28013	3.55506	-0.570699	1	no	4.71817	0	#NAME?	1	no	2.61657	3.74506	0.517312	1	no	#VALUE!	0.570699	#NAME?	-0.517312	no	no	no	no
ENSDARG00000084535	ENSDARG00000084535	5S_rRNA	chr9:32528955-32529073	3.41447	0	#NAME?	1	no	0	0	0	1	no	0	4.32315	inf	1	no	0	0	0	1	no	#NAME?	0	#VALUE!	0	no	no	no	no
ENSDARG00000084542	ENSDARG00000084542	5S_rRNA	chr10:32600557-32681061	0	2.20736	inf	1	no	0	0	0	1	no	0	0	0	1	no	0	2.25693	inf	0.18615	no	#VALUE!	0	0	#VALUE!	no	no	no	no
ENSDARG00000084565	ENSDARG00000084565	5S_rRNA	chr2:24184156-24184273	0	2.05213	inf	1	no	0	0	0	1	no	0	0	0	1	no	0	2.09821	inf	1	no	#VALUE!	0	0	#VALUE!	no	no	no	no
ENSDARG00000084583	ENSDARG00000084583	5S_rRNA	chr2:19950257-19950374	1.59455	0	#NAME?	1	no	0	0	0	1	no	0	2.00306	inf	1	no	0	0	0	1	no	#NAME?	0	#VALUE!	0	no	no	no	no
ENSDARG00000084589	ENSDARG00000084589	5S_rRNA	chr5:69428449-69508909	1.72684	0	#NAME?	1	no	0	3.30798	inf	0.251	no	0	2.17396	inf	0.16215	no	2.43471	0	#NAME?	0.171	no	#NAME?	#VALUE!	#VALUE!	#NAME?	no	no	no	no
ENSDARG00000084634	ENSDARG00000084634	5S_rRNA	chr9:25282528-25446353	1.78978	0	#NAME?	1	no	0	0	0	1	no	0	2.25319	inf	1	no	0	0	0	1	no	#NAME?	0	#VALUE!	0	no	no	no	no
ENSDARG00000084656	ENSDARG00000084656	5S_rRNA	chr10:42436949-42531064	1.74914	0	#NAME?	1	no	0	11.6922	inf	1	no	0	2.22753	inf	1	no	8.62328	0	#NAME?	1	no	#NAME?	#VALUE!	#VALUE!	#NAME?	no	no	no	no
ENSDARG00000084665	ENSDARG00000084665	5S_rRNA	chr18:27262955-27280524	1.48501	0	#NAME?	1	no	0	3.19301	inf	0.2438	no	0	1.86546	inf	1	no	2.35009	0	#NAME?	0.1853	no	#NAME?	#VALUE!	#VALUE!	#NAME?	no	no	no	no
ENSDARG00000084675	ENSDARG00000084675	5S_rRNA	chr12:28558596-28558713	0	2.05213	inf	1	no	0	0	0	1	no	0	0	0	1	no	0	2.09821	inf	1	no	#VALUE!	0	0	#VALUE!	no	no	no	no
ENSDARG00000084741	ENSDARG00000084741	5S_rRNA	chr4:22376093-22578962	1.92517	0	#NAME?	1	no	0	0	0	1	no	0	2.42364	inf	1	no	0	0	0	1	no	#NAME?	0	#VALUE!	0	no	no	no	no
ENSDARG00000084746	ENSDARG00000084746	5S_rRNA	chr23:29042994-29043111	0	6.36948	inf	1	no	0	3.42855	inf	1	no	0	0	0	1	no	2.52345	6.5065	1.36648	1	no	#VALUE!	#VALUE!	0	-1.36648	no	no	no	no
ENSDARG00000084747	ENSDARG00000084747	5S_rRNA	chr17:12631114-12785554	1.85582	0	#NAME?	1	no	0	0	0	1	no	0	2.33634	inf	1	no	0	0	0	1	no	#NAME?	0	#VALUE!	0	no	no	no	no
ENSDARG00000084748	ENSDARG00000084748	5S_rRNA	chr19:39716894-39876630	1.59455	0	#NAME?	1	no	0	4.13182	inf	1	no	0	2.00306	inf	1	no	3.04992	0	#NAME?	1	no	#NAME?	#VALUE!	#VALUE!	#NAME?	no	no	no	no
ENSDARG00000084796	ENSDARG00000084796	5S_rRNA	chr12:48927884-48927999	0	1.91577	inf	1	no	5.47744	0	#NAME?	1	no	4.89448	0	#NAME?	1	no	0	1.9425	inf	1	no	#VALUE!	#NAME?	#NAME?	#VALUE!	no	no	no	no
ENSDARG00000084833	ENSDARG00000084833	5S_rRNA	chr6:49843555-49843670	0	1.91577	inf	1	no	2.71444	0	#NAME?	1	no	2.42565	0	#NAME?	1	no	0	1.9425	inf	1	no	#VALUE!	#NAME?	#NAME?	#VALUE!	no	no	no	no
ENSDARG00000084886	ENSDARG00000084886	5S_rRNA	chr11:21883526-21894767	1.74914	0	#NAME?	1	no	0	0	0	1	no	0	2.22753	inf	1	no	0	0	0	1	no	#NAME?	0	#VALUE!	0	no	no	no	no
ENSDARG00000084891	ENSDARG00000084891	5S_rRNA	chr5:25579267-25579384	1.78978	0	#NAME?	1	no	0	0	0	1	no	0	2.25319	inf	1	no	0	0	0	1	no	#NAME?	0	#VALUE!	0	no	no	no	no
ENSDARG00000084906	ENSDARG00000084906	5S_rRNA	chr4:54361848-54392915	1.65347	0	#NAME?	1	no	0	0	0	1	no	0	2.07705	inf	1	no	0	0	0	1	no	#NAME?	0	#VALUE!	0	no	no	no	no
ENSDARG00000084932	ENSDARG00000084932	5S_rRNA	chr19:5397768-5417536	0	3.39721	inf	1	no	2.15665	0	#NAME?	1	no	1.92703	0	#NAME?	1	no	0	3.45574	inf	1	no	#VALUE!	#NAME?	#NAME?	#VALUE!	no	no	no	no
ENSDARG00000084966	ENSDARG00000084966	5S_rRNA	chr17:20956647-20982326	0	2.29013	inf	1	no	0	0	0	1	no	0	0	0	1	no	0	2.33648	inf	1	no	#VALUE!	0	0	#VALUE!	no	no	no	no
ENSDARG00000084980	ENSDARG00000084980	5S_rRNA	chr1:40487640-40495354	0	1.35278	inf	1	no	1.95103	0	#NAME?	1	no	1.74331	0	#NAME?	1	no	0	1.37165	inf	1	no	#VALUE!	#NAME?	#NAME?	#VALUE!	no	no	no	no
ENSDARG00000084988	ENSDARG00000084988	5S_rRNA	chr18:26664153-26697514	0	1.78104	inf	1	no	0	0	0	1	no	0	0	0	1	no	0	1.80589	inf	1	no	#VALUE!	0	0	#VALUE!	no	no	no	no
ENSDARG00000084990	ENSDARG00000084990	5S_rRNA	chr1:51953388-51983814	1.92517	0	#NAME?	1	no	0	0	0	1	no	0	2.42364	inf	0.16835	no	0	0	0	1	no	#NAME?	0	#VALUE!	0	no	no	no	no
ENSDARG00000085009	ENSDARG00000085009	5S_rRNA	chr10:2974239-2998599	1.74914	0	#NAME?	1	no	2.52354	0	#NAME?	0.25025	no	2.25506	2.22753	-0.0177271	1	no	0	0	0	1	no	#NAME?	#NAME?	0.0177271	0	no	no	no	no
ENSDARG00000085012	ENSDARG00000085012	5S_rRNA	chr3:20889058-20908455	0	2.05213	inf	1	no	0	0	0	1	no	0	0	0	1	no	0	2.09821	inf	1	no	#VALUE!	0	0	#VALUE!	no	no	no	no
ENSDARG00000085046	ENSDARG00000085046	5S_rRNA	chr6:40592566-40600270	1.59455	0	#NAME?	1	no	5.04708	0	#NAME?	0.25045	no	4.51013	2.00306	-1.17096	1	no	0	0	0	1	no	#NAME?	#NAME?	1.17096	0	no	no	no	no
ENSDARG00000085051	ENSDARG00000085051	5S_rRNA	chr20:23724672-23819066	1.79397	0	#NAME?	1	no	0	0	0	1	no	0	2.25737	inf	0.17545	no	0	0	0	1	no	#NAME?	0	#VALUE!	0	no	no	no	no
ENSDARG00000085058	ENSDARG00000085058	5S_rRNA	chr12:9336076-9572201	0	1.24891	inf	1	no	1.56328	0	#NAME?	1	no	1.39684	0	#NAME?	1	no	0	1.27695	inf	1	no	#VALUE!	#NAME?	#NAME?	#VALUE!	no	no	no	no
ENSDARG00000085061	ENSDARG00000085061	5S_rRNA	chr14:16792461-16792586	0	1.55868	inf	1	no	0	0	0	1	no	0	0	0	1	no	0	1.59369	inf	1	no	#VALUE!	0	0	#VALUE!	no	no	no	no
ENSDARG00000085074	ENSDARG00000085074	5S_rRNA	chr4:2419792-2508720	0	2.35065	inf	1	no	0	0	0	1	no	0	0	0	1	no	0	2.39731	inf	1	no	#VALUE!	0	0	#VALUE!	no	no	no	no
ENSDARG00000085075	ENSDARG00000085075	5S_rRNA	chr22:33447235-33569743	0	3.97461	inf	1	no	5.23332	0	#NAME?	1	no	4.67656	0	#NAME?	1	no	0	4.04816	inf	1	no	#VALUE!	#NAME?	#NAME?	#VALUE!	no	no	no	no
ENSDARG00000085137	ENSDARG00000085137	5S_rRNA	chr16:49065323-49152177	1.78978	0	#NAME?	1	no	0	0	0	1	no	0	2.25319	inf	0.18505	no	0	0	0	1	no	#NAME?	0	#VALUE!	0	no	no	no	no
ENSDARG00000085178	ENSDARG00000085178	5S_rRNA	chr12:8316471-8516635	1.78999	0	#NAME?	1	no	0	0	0	1	no	0	2.25342	inf	1	no	0	0	0	1	no	#NAME?	0	#VALUE!	0	no	no	no	no
ENSDARG00000085180	ENSDARG00000085180	5S_rRNA	chr9:2843706-2843822	1.85582	0	#NAME?	1	no	0	0	0	1	no	0	2.33634	inf	1	no	0	0	0	1	no	#NAME?	0	#VALUE!	0	no	no	no	no
ENSDARG00000085182	ENSDARG00000085182	5S_rRNA	chr17:6720875-6735778	1.5549	0	#NAME?	1	no	0	0	0	1	no	0	1.9575	inf	1	no	0	0	0	1	no	#NAME?	0	#VALUE!	0	no	no	no	no
ENSDARG00000085193	ENSDARG00000085193	5S_rRNA	chr7:30489564-30498431	1.78978	0	#NAME?	1	no	5.09222	3.42855	-0.570699	0.55115	no	4.55026	2.25319	-1.01398	0.52405	no	2.52345	0	#NAME?	0.18265	no	#NAME?	0.570699	1.01398	#NAME?	no	no	no	no
ENSDARG00000085207	ENSDARG00000085207	5S_rRNA	chr8:31007370-31164478	1.92526	0	#NAME?	1	no	5.42888	0	#NAME?	1	no	4.85131	2.42373	-1.00114	1	no	0	0	0	1	no	#NAME?	#NAME?	1.00114	0	no	no	no	no
ENSDARG00000085208	ENSDARG00000085208	5S_rRNA	chr24:32795677-32876109	0	1.84676	inf	1	no	0	0	0	1	no	0	0	0	1	no	0	1.87253	inf	1	no	#VALUE!	0	0	#VALUE!	no	no	no	no
ENSDARG00000085240	ENSDARG00000085240	5S_rRNA	chr11:444187-459312	0	2.12785	inf	1	no	0	0	0	1	no	0	0	0	1	no	0	2.17564	inf	0.18325	no	#VALUE!	0	0	#VALUE!	no	no	no	no
ENSDARG00000085246	ENSDARG00000085246	5S_rRNA	chr12:30561733-30561851	1.53848	0	#NAME?	1	no	0	3.30798	inf	1	no	0	1.93263	inf	1	no	2.43471	0	#NAME?	1	no	#NAME?	#VALUE!	#VALUE!	#NAME?	no	no	no	no
ENSDARG00000085366	ENSDARG00000085366	5S_rRNA	chr21:22615779-23024668	1.59455	0	#NAME?	1	no	2.56869	0	#NAME?	1	no	2.2952	2.00306	-0.196409	0.7012	no	0	0	0	1	no	#NAME?	#NAME?	0.196409	0	no	no	no	no
ENSDARG00000085391	ENSDARG00000085391	5S_rRNA	chr8:11849786-11883760	0	2.05213	inf	1	no	0	0	0	1	no	0	0	0	1	no	0	2.09821	inf	1	no	#VALUE!	0	0	#VALUE!	no	no	no	no
ENSDARG00000085412	ENSDARG00000085412	5S_rRNA	chr22:14452626-14452743	0	1.78104	inf	1	no	2.52354	0	#NAME?	1	no	2.25506	0	#NAME?	1	no	0	1.80589	inf	1	no	#VALUE!	#NAME?	#NAME?	#VALUE!	no	no	no	no
ENSDARG00000085418	ENSDARG00000085418	5S_rRNA	chr20:9419785-9479200	1.65351	0	#NAME?	1	no	0	3.55506	inf	0.2495	no	0	2.0771	inf	1	no	2.61657	0	#NAME?	0.16815	no	#NAME?	#VALUE!	#VALUE!	#NAME?	no	no	no	no
ENSDARG00000085455	ENSDARG00000085455	5S_rRNA	chr22:41133173-41159202	1.5576	0	#NAME?	1	no	0	0	0	1	no	0	1.95983	inf	1	no	0	0	0	1	no	#NAME?	0	#VALUE!	0	no	no	no	no
ENSDARG00000085474	ENSDARG00000085474	5S_rRNA	chr7:29761278-29799390	1.81369	0	#NAME?	1	no	0	0	0	1	no	0	2.30972	inf	1	no	0	0	0	1	no	#NAME?	0	#VALUE!	0	no	no	no	no
ENSDARG00000085525	ENSDARG00000085525	5S_rRNA	chr14:6395284-6484954	1.71517	0	#NAME?	1	no	0	0	0	1	no	0	2.15459	inf	1	no	0	0	0	1	no	#NAME?	0	#VALUE!	0	no	no	no	no
ENSDARG00000085533	ENSDARG00000085533	5S_rRNA	chr3:11922640-11922755	0	2.43658	inf	1	no	2.71444	0	#NAME?	1	no	2.42565	0	#NAME?	1	no	0	2.48484	inf	1	no	#VALUE!	#NAME?	#NAME?	#VALUE!	no	no	no	no
ENSDARG00000085540	ENSDARG00000085540	5S_rRNA	chr19:5394977-5395094	6.84197	0	#NAME?	1	no	12.708	10.9889	-0.209687	1	no	11.3556	8.68564	-0.386698	1	no	8.09682	0	#NAME?	1	no	#NAME?	0.209687	0.386698	#NAME?	no	no	no	no
ENSDARG00000085542	ENSDARG00000085542	5S_rRNA	chr8:15169361-15348604	1.33877	0	#NAME?	1	no	0	0	0	1	no	0	1.68176	inf	1	no	0	0	0	1	no	#NAME?	0	#VALUE!	0	no	no	no	no
ENSDARG00000085546	ENSDARG00000085546	5S_rRNA	chr11:28797175-28927399	0	1.78417	inf	1	no	0	3.42855	inf	1	no	0	0	0	1	no	2.52345	1.80925	-0.480003	1	no	#VALUE!	#VALUE!	0	0.480003	no	no	no	no
ENSDARG00000085567	ENSDARG00000085567	5S_rRNA	chr3:28952484-29061067	0	2.26523	inf	1	no	2.52368	0	#NAME?	1	no	2.2552	0	#NAME?	1	no	0	2.31008	inf	1	no	#VALUE!	#NAME?	#NAME?	#VALUE!	no	no	no	no
ENSDARG00000085576	ENSDARG00000085576	5S_rRNA	chr13:43937288-43937405	1.78978	0	#NAME?	1	no	2.56869	15.1207	2.55742	1	no	2.2952	2.25319	-0.0266461	1	no	11.1467	0	#NAME?	1	no	#NAME?	-2.55742	0.0266461	#NAME?	no	no	no	no
ENSDARG00000085582	ENSDARG00000085582	5S_rRNA	chr9:31327380-31350098	0	2.26523	inf	1	no	0	0	0	1	no	0	0	0	1	no	0	2.31008	inf	1	no	#VALUE!	0	0	#VALUE!	no	no	no	no
ENSDARG00000085584	ENSDARG00000085584	5S_rRNA	chr7:14869290-15084713	0	1.71841	inf	1	no	0	0	0	1	no	0	0	0	1	no	0	1.74238	inf	1	no	#VALUE!	0	0	#VALUE!	no	no	no	no
ENSDARG00000085606	ENSDARG00000085606	5S_rRNA	chr13:31911574-31931472	1.59455	0	#NAME?	1	no	0	4.13182	inf	1	no	0	2.00306	inf	1	no	3.04992	0	#NAME?	1	no	#NAME?	#VALUE!	#VALUE!	#NAME?	no	no	no	no
ENSDARG00000085616	ENSDARG00000085616	5S_rRNA	chr7:24081950-24123980	4.8207	0	#NAME?	1	no	4.74295	3.84924	-0.301211	1	no	4.23816	6.06436	0.516918	1	no	2.84156	0	#NAME?	1	no	#NAME?	0.301211	-0.516918	#NAME?	no	no	no	no
ENSDARG00000085623	ENSDARG00000085623	5S_rRNA	chr19:36967042-36977274	0	2.05213	inf	1	no	2.56869	0	#NAME?	1	no	2.2952	0	#NAME?	1	no	0	2.09821	inf	1	no	#VALUE!	#NAME?	#NAME?	#VALUE!	no	no	no	no
ENSDARG00000085625	ENSDARG00000085625	5S_rRNA	chr10:1938-19705	1.65339	0	#NAME?	1	no	0	0	0	1	no	0	2.07698	inf	1	no	0	0	0	1	no	#NAME?	0	#VALUE!	0	no	no	no	no
ENSDARG00000085630	ENSDARG00000085630	5S_rRNA	chr12:36438018-36446387	1.48501	0	#NAME?	1	no	0	3.19301	inf	0.24555	no	0	1.86546	inf	1	no	2.35009	0	#NAME?	0.1861	no	#NAME?	#VALUE!	#VALUE!	#NAME?	no	no	no	no
ENSDARG00000085638	ENSDARG00000085638	5S_rRNA	chr18:8636380-8703278	0	2.12785	inf	1	no	5.23332	0	#NAME?	0.25315	no	4.67656	0	#NAME?	1	no	0	2.17564	inf	0.1754	no	#VALUE!	#NAME?	#NAME?	#VALUE!	no	no	no	no
ENSDARG00000085697	ENSDARG00000085697	5S_rRNA	chr5:33509663-33513260	0	4.64395	inf	1	no	0	0	0	1	no	0	0	0	1	no	0	4.74177	inf	0.18285	no	#VALUE!	0	0	#VALUE!	no	no	no	no
ENSDARG00000085711	ENSDARG00000085711	5S_rRNA	chr7:4251307-4251445	0	1.15406	inf	1	no	0	0	0	1	no	0	0	0	1	no	0	1.17692	inf	1	no	#VALUE!	0	0	#VALUE!	no	no	no	no
ENSDARG00000085725	ENSDARG00000085725	5S_rRNA	chr23:29168814-29168932	0	3.90397	inf	1	no	0	0	0	1	no	0	0	0	1	no	0	3.97123	inf	1	no	#VALUE!	0	0	#VALUE!	no	no	no	no
ENSDARG00000085728	ENSDARG00000085728	5S_rRNA	chr2:26003797-26003915	1.53848	0	#NAME?	1	no	0	3.30798	inf	1	no	0	1.93263	inf	1	no	2.43471	0	#NAME?	1	no	#NAME?	#VALUE!	#VALUE!	#NAME?	no	no	no	no
ENSDARG00000085745	ENSDARG00000085745	5S_rRNA	chr6:52742714-52798860	0	2.20736	inf	1	no	0	0	0	1	no	0	0	0	1	no	0	2.25693	inf	1	no	#VALUE!	0	0	#VALUE!	no	no	no	no
ENSDARG00000085753	ENSDARG00000085753	5S_rRNA	chr20:23724672-23819066	0	1.77832	inf	1	no	0	2.69767	inf	0.24495	no	0	0	0	1	no	1.98689	1.81353	-0.131711	1	no	#VALUE!	#VALUE!	0	0.131711	no	no	no	no
ENSDARG00000085754	ENSDARG00000085754	5S_rRNA	chr23:19538517-19722764	1.71517	0	#NAME?	1	no	0	0	0	1	no	0	2.15459	inf	1	no	0	0	0	1	no	#NAME?	0	#VALUE!	0	no	no	no	no
ENSDARG00000085778	ENSDARG00000085778	5S_rRNA	chr13:38071475-38071592	1.59455	0	#NAME?	1	no	0	0	0	1	no	0	2.00306	inf	1	no	0	0	0	1	no	#NAME?	0	#VALUE!	0	no	no	no	no
ENSDARG00000085782	ENSDARG00000085782	5S_rRNA	chr25:34778356-34778472	0	1.84676	inf	1	no	0	0	0	1	no	0	0	0	1	no	0	1.87253	inf	1	no	#VALUE!	0	0	#VALUE!	no	no	no	no
ENSDARG00000085794	ENSDARG00000085794	5S_rRNA	chr16:20562851-20918192	1.78978	0	#NAME?	1	no	0	0	0	1	no	0	2.25319	inf	1	no	0	0	0	1	no	#NAME?	0	#VALUE!	0	no	no	no	no
ENSDARG00000085814	ENSDARG00000085814	5S_rRNA	chr21:537752-568922	5.13347	0	#NAME?	0.238	no	0	0	0	1	no	0	6.48378	inf	0.17775	no	0	0	0	1	no	#NAME?	0	#VALUE!	0	no	no	no	no
ENSDARG00000085821	ENSDARG00000085821	5S_rRNA	Zv9_scaffold3557:33658-91198	0	1.91115	inf	1	no	0	0	0	1	no	0	0	0	1	no	0	1.95407	inf	1	no	#VALUE!	0	0	#VALUE!	no	no	no	no
ENSDARG00000085824	ENSDARG00000085824	5S_rRNA	chr13:22263301-22263417	1.85582	0	#NAME?	1	no	0	0	0	1	no	0	2.33634	inf	1	no	0	0	0	1	no	#NAME?	0	#VALUE!	0	no	no	no	no
ENSDARG00000085855	ENSDARG00000085855	5S_rRNA	chr15:27717706-27757596	1.71517	0	#NAME?	1	no	0	0	0	1	no	0	2.15459	inf	1	no	0	0	0	1	no	#NAME?	0	#VALUE!	0	no	no	no	no
ENSDARG00000085871	ENSDARG00000085871	5S_rRNA	chr7:24081950-24123980	3.04554	0	#NAME?	0.2192	no	9.20009	3.717	-1.30751	0.57995	no	8.22074	3.82971	-1.10203	0.53135	no	2.74395	0	#NAME?	1	no	#NAME?	1.30751	1.10203	#NAME?	no	no	no	no
ENSDARG00000085872	ENSDARG00000085872	5S_rRNA	chr23:27169379-27169495	0	2.12785	inf	1	no	0	0	0	1	no	0	0	0	1	no	0	2.17564	inf	1	no	#VALUE!	0	0	#VALUE!	no	no	no	no
ENSDARG00000085882	ENSDARG00000085882	5S_rRNA	chr2:37225076-37258737	0	1.84676	inf	1	no	7.94369	3.55515	-1.1599	1	no	7.09814	0	#NAME?	1	no	2.61665	1.87253	-0.482735	1	no	#VALUE!	1.1599	#NAME?	0.482735	no	no	no	no
ENSDARG00000085887	ENSDARG00000085887	5S_rRNA	chr3:40051266-40131525	1.78978	0	#NAME?	1	no	2.52354	0	#NAME?	1	no	2.25506	2.25319	-0.00119725	1	no	0	0	0	1	no	#NAME?	#NAME?	0.00119725	0	no	no	no	no
ENSDARG00000085898	ENSDARG00000085898	5S_rRNA	chr14:40388025-40426337	1.95266	0	#NAME?	1	no	2.86757	0	#NAME?	1	no	2.56226	2.48671	-0.0431759	0.788	no	0	0	0	1	no	#NAME?	#NAME?	0.0431759	0	no	no	no	no
ENSDARG00000085915	ENSDARG00000085915	5S_rRNA	chr20:6358594-6581574	0	2.34881	inf	1	no	0	0	0	1	no	0	0	0	1	no	0	2.39533	inf	1	no	#VALUE!	0	0	#VALUE!	no	no	no	no
ENSDARG00000085944	ENSDARG00000085944	5S_rRNA	chr25:29755232-29755349	0	1.78104	inf	1	no	0	6.85709	inf	1	no	0	0	0	1	no	5.0469	1.80589	-1.48269	1	no	#VALUE!	#VALUE!	0	1.48269	no	no	no	no
ENSDARG00000085979	ENSDARG00000085979	5S_rRNA	chr22:24822178-24822295	1.74914	0	#NAME?	1	no	2.52354	3.42855	0.442149	1	no	2.25506	2.22753	-0.0177271	1	no	2.52345	0	#NAME?	1	no	#NAME?	-0.442149	0.0177271	#NAME?	no	no	no	no
ENSDARG00000085996	ENSDARG00000085996	5S_rRNA	chr18:5565807-5620361	0	2.43658	inf	1	no	0	0	0	1	no	0	0	0	1	no	0	2.48484	inf	1	no	#VALUE!	0	0	#VALUE!	no	no	no	no
ENSDARG00000086053	ENSDARG00000086053	5S_rRNA	Zv9_NA874:6059-6175	1.65339	0	#NAME?	1	no	0	0	0	1	no	0	2.07698	inf	1	no	0	0	0	1	no	#NAME?	0	#VALUE!	0	no	no	no	no
ENSDARG00000086401	ENSDARG00000086401	5S_rRNA	chr15:24454276-24506894	0	2.43658	inf	1	no	0	0	0	1	no	0	0	0	1	no	0	2.48484	inf	1	no	#VALUE!	0	0	#VALUE!	no	no	no	no
ENSDARG00000086714	ENSDARG00000086714	5S_rRNA	chr13:53800616-53800731	1.88146	0	#NAME?	1	no	0	3.68791	inf	1	no	0	2.39603	inf	1	no	2.71434	0	#NAME?	1	no	#NAME?	#VALUE!	#VALUE!	#NAME?	no	no	no	no
ENSDARG00000086811	ENSDARG00000086811	5S_rRNA	Zv9_NA101:39833-39948	0	1.91577	inf	1	no	0	0	0	1	no	0	0	0	1	no	0	1.9425	inf	1	no	#VALUE!	0	0	#VALUE!	no	no	no	no
ENSDARG00000086882	ENSDARG00000086882	5S_rRNA	chr19:8104466-8117542	0	4.0956	inf	0.22205	no	0	0	0	1	no	0	0	0	1	no	0	4.17671	inf	0.1717	no	#VALUE!	0	0	#VALUE!	no	no	no	no
ENSDARG00000087090	ENSDARG00000087090	5S_rRNA	chr22:42088142-42088257	0	2.43658	inf	1	no	0	0	0	1	no	0	0	0	1	no	0	2.48484	inf	1	no	#VALUE!	0	0	#VALUE!	no	no	no	no
ENSDARG00000087098	ENSDARG00000087098	5S_rRNA	chr25:28804288-29136657	0	2.20843	inf	1	no	0	0	0	1	no	0	0	0	1	no	0	2.25802	inf	1	no	#VALUE!	0	0	#VALUE!	no	no	no	no
ENSDARG00000087151	ENSDARG00000087151	5S_rRNA	chr2:51196968-51197085	0	2.05213	inf	1	no	2.56869	0	#NAME?	1	no	2.2952	0	#NAME?	1	no	0	2.09821	inf	1	no	#VALUE!	#NAME?	#NAME?	#VALUE!	no	no	no	no
ENSDARG00000087244	ENSDARG00000087244	5S_rRNA	chr9:6435962-6543070	0	1.91577	inf	1	no	0	4.44438	inf	1	no	0	0	0	1	no	3.28064	1.9425	-0.756061	1	no	#VALUE!	#VALUE!	0	0.756061	no	no	no	no
ENSDARG00000087294	ENSDARG00000087294	5S_rRNA	Zv9_NA380:9153-9268	0	1.91577	inf	1	no	0	0	0	1	no	0	0	0	1	no	0	1.9425	inf	1	no	#VALUE!	0	0	#VALUE!	no	no	no	no
ENSDARG00000087329	ENSDARG00000087329	5S_rRNA	chr15:27983463-28134396	0	1.91577	inf	1	no	0	0	0	1	no	0	0	0	1	no	0	1.9425	inf	1	no	#VALUE!	0	0	#VALUE!	no	no	no	no
ENSDARG00000087400	ENSDARG00000087400	5S_rRNA	chr12:9576918-9636388	3.64034	0	#NAME?	0.22395	no	0	3.68791	inf	0.2076	no	0	4.57823	inf	0.1395	no	2.71434	0	#NAME?	0.1642	no	#NAME?	#VALUE!	#VALUE!	#NAME?	no	no	no	no
ENSDARG00000087430	ENSDARG00000087430	5S_rRNA	chr7:58153141-58351210	0	2.20736	inf	1	no	2.71444	0	#NAME?	0.2255	no	2.42565	0	#NAME?	1	no	0	2.25693	inf	0.1862	no	#VALUE!	#NAME?	#NAME?	#VALUE!	no	no	no	no
ENSDARG00000087605	ENSDARG00000087605	5S_rRNA	chr15:5722883-5775805	3.64034	0	#NAME?	0.2369	no	0	0	0	1	no	0	4.57823	inf	0.1786	no	0	0	0	1	no	#NAME?	0	#VALUE!	0	no	no	no	no
ENSDARG00000087648	ENSDARG00000087648	5S_rRNA	chr17:49245249-49245364	1.88146	0	#NAME?	1	no	0	0	0	1	no	0	2.39603	inf	1	no	0	0	0	1	no	#NAME?	0	#VALUE!	0	no	no	no	no
ENSDARG00000087649	ENSDARG00000087649	5S_rRNA	chr13:31293886-31313889	0	2.20736	inf	1	no	0	0	0	1	no	0	0	0	1	no	0	2.25693	inf	0.1672	no	#VALUE!	0	0	#VALUE!	no	no	no	no
ENSDARG00000087695	ENSDARG00000087695	5S_rRNA	chr3:26830239-26841515	0	1.84676	inf	1	no	7.94361	7.11013	-0.159919	0.6269	no	7.09806	0	#NAME?	0.1742	no	5.23314	1.87253	-1.48269	0.61745	no	#VALUE!	0.159919	#NAME?	1.48269	no	no	no	no
ENSDARG00000087716	ENSDARG00000087716	5S_rRNA	chr10:20565018-20565135	3.53892	0	#NAME?	1	no	2.52354	0	#NAME?	1	no	2.25506	4.48072	0.990562	1	no	0	0	0	1	no	#NAME?	#NAME?	-0.990562	0	no	no	no	no
ENSDARG00000087763	ENSDARG00000087763	5S_rRNA	chr10:36686556-36873764	0	1.78104	inf	1	no	0	0	0	1	no	0	0	0	1	no	0	1.80589	inf	1	no	#VALUE!	0	0	#VALUE!	no	no	no	no
ENSDARG00000087809	ENSDARG00000087809	5S_rRNA	chr24:10673653-10823570	1.92517	0	#NAME?	1	no	2.763	0	#NAME?	1	no	2.46882	2.42364	-0.0266462	1	no	0	0	0	1	no	#NAME?	#NAME?	0.0266462	0	no	no	no	no
ENSDARG00000087926	ENSDARG00000087926	5S_rRNA	chr7:8207282-8226398	3.80662	0	#NAME?	0.23925	no	8.19187	0	#NAME?	0.23975	no	7.32013	4.81967	-0.602934	0.6228	no	0	0	0	1	no	#NAME?	#NAME?	0.602934	0	no	no	no	no
ENSDARG00000088090	ENSDARG00000088090	5S_rRNA	chr21:30797797-30797914	0	3.83317	inf	1	no	0	0	0	1	no	0	0	0	1	no	0	3.9041	inf	1	no	#VALUE!	0	0	#VALUE!	no	no	no	no
ENSDARG00000088376	ENSDARG00000088376	5S_rRNA	chr15:33791310-33864960	0	1.07637	inf	1	no	0	0	0	1	no	0	0	0	1	no	0	1.10054	inf	1	no	#VALUE!	0	0	#VALUE!	no	no	no	no
ENSDARG00000088422	ENSDARG00000088422	5S_rRNA	chr10:38273746-38406003	1.92517	0	#NAME?	1	no	0	7.37581	inf	1	no	0	2.42364	inf	1	no	5.42868	0	#NAME?	1	no	#NAME?	#VALUE!	#VALUE!	#NAME?	no	no	no	no
ENSDARG00000088427	ENSDARG00000088427	5S_rRNA	Zv9_NA156:36961-59463	0	6.15638	inf	1	no	0	0	0	1	no	0	0	0	1	no	0	6.29463	inf	0.15445	no	#VALUE!	0	0	#VALUE!	no	no	no	no
ENSDARG00000088718	ENSDARG00000088718	5S_rRNA	chr3:48404108-48404223	1.88146	0	#NAME?	1	no	2.71444	12.5767	2.21202	1	no	2.42565	2.39603	-0.0177271	1	no	9.27561	0	#NAME?	1	no	#NAME?	-2.21202	0.0177271	#NAME?	no	no	no	no
ENSDARG00000088758	ENSDARG00000088758	5S_rRNA	chr4:7636825-7895707	1.92517	0	#NAME?	1	no	0	0	0	1	no	0	2.42364	inf	1	no	0	0	0	1	no	#NAME?	0	#VALUE!	0	no	no	no	no
ENSDARG00000088778	ENSDARG00000088778	5S_rRNA	chr17:12631114-12785554	0	1.91577	inf	1	no	0	0	0	1	no	0	0	0	1	no	0	1.9425	inf	1	no	#VALUE!	0	0	#VALUE!	no	no	no	no
ENSDARG00000089013	ENSDARG00000089013	5S_rRNA	chr1:30487662-30487779	1.78978	0	#NAME?	1	no	0	3.42855	inf	1	no	0	2.25319	inf	1	no	2.52345	0	#NAME?	1	no	#NAME?	#VALUE!	#VALUE!	#NAME?	no	no	no	no
ENSDARG00000089385	ENSDARG00000089385	5S_rRNA	chr25:21012806-21020024	0	1.78104	inf	1	no	0	0	0	1	no	0	0	0	1	no	0	1.80589	inf	1	no	#VALUE!	0	0	#VALUE!	no	no	no	no
ENSDARG00000089395	ENSDARG00000089395	5S_rRNA	chr7:12413063-12422825	0	4.41473	inf	1	no	0	0	0	1	no	0	0	0	1	no	0	4.51387	inf	0.179	no	#VALUE!	0	0	#VALUE!	no	no	no	no
ENSDARG00000089452	ENSDARG00000089452	5S_rRNA	chr5:43811147-43811262	1.71517	0	#NAME?	1	no	0	0	0	1	no	0	2.15459	inf	1	no	0	0	0	1	no	#NAME?	0	#VALUE!	0	no	no	no	no
ENSDARG00000089530	ENSDARG00000089530	5S_rRNA	chr6:9306392-9325605	1.92517	0	#NAME?	1	no	2.76764	0	#NAME?	1	no	2.47297	2.42364	-0.029068	1	no	0	0	0	1	no	#NAME?	#NAME?	0.029068	0	no	no	no	no
ENSDARG00000089565	ENSDARG00000089565	5S_rRNA	chr11:15181161-15181278	1.74914	0	#NAME?	1	no	5.09222	0	#NAME?	1	no	4.55026	2.22753	-1.03051	1	no	0	0	0	1	no	#NAME?	#NAME?	1.03051	0	no	no	no	no
ENSDARG00000089579	ENSDARG00000089579	5S_rRNA	chr13:48335007-48444712	0	2.26623	inf	1	no	0	0	0	1	no	0	0	0	1	no	0	2.31118	inf	1	no	#VALUE!	0	0	#VALUE!	no	no	no	no
ENSDARG00000089686	ENSDARG00000089686	5S_rRNA	chr21:9634118-9634233	3.59663	0	#NAME?	1	no	0	0	0	1	no	0	4.55062	inf	1	no	0	0	0	1	no	#NAME?	0	#VALUE!	0	no	no	no	no
ENSDARG00000089775	ENSDARG00000089775	5S_rRNA	chr17:37421223-37448831	0	2.43658	inf	1	no	0	0	0	1	no	0	0	0	1	no	0	2.48484	inf	1	no	#VALUE!	0	0	#VALUE!	no	no	no	no
ENSDARG00000090045	ENSDARG00000090045	5S_rRNA	chr13:51865255-51901548	0	2.12785	inf	1	no	2.66347	0	#NAME?	1	no	2.37989	0	#NAME?	0.1419	no	0	2.17564	inf	0.15225	no	#VALUE!	#NAME?	#NAME?	#VALUE!	no	no	no	no
ENSDARG00000090110	ENSDARG00000090110	5S_rRNA	chr19:13559191-13590112	1.78978	0	#NAME?	1	no	2.56869	3.42855	0.416566	1	no	2.2952	2.25319	-0.0266461	1	no	2.52345	0	#NAME?	1	no	#NAME?	-0.416566	0.0266461	#NAME?	no	no	no	no
ENSDARG00000090432	ENSDARG00000090432	5S_rRNA	chr7:42800362-42800477	3.76292	0	#NAME?	1	no	2.763	0	#NAME?	1	no	2.46882	4.79206	0.956824	1	no	0	0	0	1	no	#NAME?	#NAME?	-0.956824	0	no	no	no	no
ENSDARG00000090474	ENSDARG00000090474	5S_rRNA	chr13:34542670-34788678	1.92517	0	#NAME?	1	no	0	0	0	1	no	0	2.42364	inf	0.1712	no	0	0	0	1	no	#NAME?	0	#VALUE!	0	no	no	no	no
ENSDARG00000090595	ENSDARG00000090595	5S_rRNA	chr25:36968859-36968976	1.74914	0	#NAME?	1	no	0	0	0	1	no	0	2.22753	inf	1	no	0	0	0	1	no	#NAME?	0	#VALUE!	0	no	no	no	no
ENSDARG00000091030	ENSDARG00000091030	5S_rRNA	chr7:43175229-43314061	1.88232	0	#NAME?	1	no	5.43055	0	#NAME?	1	no	4.85281	2.39691	-1.01764	1	no	0	0	0	1	no	#NAME?	#NAME?	1.01764	0	no	no	no	no
ENSDARG00000091060	ENSDARG00000091060	5S_rRNA	chr1:48013415-48188418	1.92517	0	#NAME?	1	no	0	0	0	1	no	0	2.42364	inf	0.17925	no	0	0	0	1	no	#NAME?	0	#VALUE!	0	no	no	no	no
ENSDARG00000091139	ENSDARG00000091139	5S_rRNA	chr17:25698401-25726208	0	2.43658	inf	1	no	2.763	0	#NAME?	1	no	2.46882	0	#NAME?	0.17665	no	0	2.48484	inf	1	no	#VALUE!	#NAME?	#NAME?	#VALUE!	no	no	no	no
ENSDARG00000091200	ENSDARG00000091200	5S_rRNA	chr20:30365090-30365205	1.88146	0	#NAME?	1	no	0	0	0	1	no	0	2.39603	inf	1	no	0	0	0	1	no	#NAME?	0	#VALUE!	0	no	no	no	no
ENSDARG00000091483	ENSDARG00000091483	5S_rRNA	chr5:9440922-9462855	0	1.97996	inf	1	no	2.47836	3.30798	0.416566	0.63445	no	2.21448	0	#NAME?	0.18475	no	2.43471	2.02442	-0.266239	0.7623	no	#VALUE!	-0.416566	#NAME?	0.266239	no	no	no	no
ENSDARG00000091684	ENSDARG00000091684	5S_rRNA	chr4:60868521-60903224	1.74946	0	#NAME?	1	no	0	4.13182	inf	1	no	0	2.22787	inf	1	no	3.04992	0	#NAME?	1	no	#NAME?	#VALUE!	#VALUE!	#NAME?	no	no	no	no
ENSDARG00000029772	ENSDARG00000029772	ablim3	chr14:43308397-43418987	0.00606322	0	#NAME?	1	no	0.0439552	0	#NAME?	1	no	0.0392753	0.00761665	-2.36639	1	no	0	0	0	1	no	#NAME?	#NAME?	2.36639	0	no	no	no	no
ENSDARG00000083885	ENSDARG00000083885	ACA64	chr9:39210878-39214404	1.2765	0	#NAME?	1	no	0	0	0	1	no	0	1.60639	inf	1	no	0	0	0	1	no	#NAME?	0	#VALUE!	0	no	no	no	no
ENSDARG00000025372	ENSDARG00000025372	admp	chr2:54071702-54087723	0	0.00484314	inf	1	no	0.0109839	0.0353359	1.68575	1	no	0.00981443	0	#NAME?	1	no	0.0260834	0.00493905	-2.40083	1	no	#VALUE!	-1.68575	#NAME?	2.40083	no	no	no	no
ENSDARG00000089162	ENSDARG00000089162	afap1l1a	chr14:35692834-35764369	0.0180101	0	#NAME?	1	no	0.0819752	0.0290143	-1.49842	1	no	0.0732481	0.0228178	-1.68263	1	no	0.0213888	0	#NAME?	1	no	#NAME?	1.49842	1.68263	#NAME?	no	no	no	no
ENSDARG00000096480	ENSDARG00000096480	AGBL4 (2 of 2)	chr8:15828239-16510917	0.0539506	0	#NAME?	1	no	0	0.0921001	inf	1	no	0	0.0684504	inf	1	no	0.067949	0	#NAME?	1	no	#NAME?	#VALUE!	#VALUE!	#NAME?	no	no	no	no
ENSDARG00000077610	ENSDARG00000077610	AGPHD1 (2 of 2)	chr22:37545029-37549771	0.0137656	0	#NAME?	1	no	0.113643	0.0336119	-1.75746	1	no	0.101549	0.0173121	-2.55232	1	no	0.0248108	0	#NAME?	1	no	#NAME?	1.75746	2.55232	#NAME?	no	no	no	no
ENSDARG00000015734	ENSDARG00000015734	aicda	chr16:14411897-14417073	0	0.0109205	inf	1	no	0	0	0	1	no	0	0	0	1	no	0	0.0111657	inf	1	no	#VALUE!	0	0	#VALUE!	no	no	no	no
ENSDARG00000052758	ENSDARG00000052758	AL845306.1	chr20:39401704-39404817	0	0.0109041	inf	1	no	0	0	0	1	no	0	0	0	1	no	0	0.011149	inf	1	no	#VALUE!	0	0	#VALUE!	no	no	no	no
ENSDARG00000095454	ENSDARG00000095454	AL928685.3	chr22:6188398-6189660	0.0177443	0	#NAME?	1	no	0.0763997	0.0819277	0.100784	1	no	0.0682654	0.0223387	-1.61161	1	no	0.0604752	0	#NAME?	1	no	#NAME?	-0.100784	1.61161	#NAME?	no	no	no	no
ENSDARG00000094456	ENSDARG00000094456	AL928824.1	chr20:51466643-51521276	0	0.00552625	inf	1	no	0	0	0	1	no	0	0	0	1	no	0	0.00565034	inf	1	no	#VALUE!	0	0	#VALUE!	no	no	no	no
ENSDARG00000030025	ENSDARG00000030025	AL928870.1	chr15:30311254-30315246	0.00465715	0	#NAME?	1	no	0.00671902	0	#NAME?	1	no	0.0060042	0.00593087	-0.0177271	1	no	0	0	0	1	no	#NAME?	#NAME?	0.0177271	0	no	no	no	no
ENSDARG00000086813	ENSDARG00000086813	AL929239.1	chr22:17011901-17012906	0.0156345	0	#NAME?	1	no	0	0	0	1	no	0	0.0197953	inf	1	no	0	0	0	1	no	#NAME?	0	#VALUE!	0	no	no	no	no
ENSDARG00000036460	ENSDARG00000036460	AL929434.2	chr14:32636049-32647291	0.0233056	0	#NAME?	1	no	0.0358599	0.0386812	0.109261	1	no	0.0320429	0.0292992	-0.12914	1	no	0.0285527	0	#NAME?	1	no	#NAME?	-0.109261	0.12914	#NAME?	no	no	no	no
ENSDARG00000087121	ENSDARG00000087121	AL929558.2	chr14:2723665-2726047	0.00259051	0	#NAME?	1	no	0	0	0	1	no	0	0.00325419	inf	1	no	0	0	0	1	no	#NAME?	0	#VALUE!	0	no	no	no	no
ENSDARG00000088435	ENSDARG00000088435	AL935114.2	chr16:1868602-2257762	0.0132273	0	#NAME?	1	no	0	0	0	1	no	0	0.016845	inf	1	no	0	0	0	1	no	#NAME?	0	#VALUE!	0	no	no	no	no
ENSDARG00000074494	ENSDARG00000074494	AL935268.1	chr12:34288837-34340681	0.00578349	0	#NAME?	1	no	0	0.00553951	inf	1	no	0	0.00728099	inf	1	no	0.00407715	0	#NAME?	1	no	#NAME?	#VALUE!	#VALUE!	#NAME?	no	no	no	no
ENSDARG00000023189	ENSDARG00000023189	AL954173.1	chr25:3656192-3657080	0	0.0223367	inf	1	no	0.0526914	0.0391151	-0.42984	1	no	0.0470834	0	#NAME?	1	no	0.028835	0.0228072	-0.338329	1	no	#VALUE!	0.42984	#NAME?	0.338329	no	no	no	no
ENSDARG00000015589	ENSDARG00000015589	ankrd33bb	chr2:30246557-30264097	0	0.00702247	inf	1	no	0.0157724	0.0106273	-0.569632	1	no	0.0140929	0	#NAME?	1	no	0.00781689	0.00716106	-0.126422	1	no	#VALUE!	0.569632	#NAME?	0.126422	no	no	no	no
ENSDARG00000076719	ENSDARG00000076719	ANKRD34A	chr16:45637240-45638788	0.00419817	0	#NAME?	1	no	0.00676289	0.0416618	2.62301	1	no	0.00604284	0.00527371	-0.196409	1	no	0.0307335	0	#NAME?	1	no	#NAME?	-2.62301	0.196409	#NAME?	no	no	no	no
ENSDARG00000071682	ENSDARG00000071682	ATCAY (3 of 3)	chr22:4759571-4826931	0	0.0349275	inf	1	no	0.0198033	0	#NAME?	1	no	0.0176948	0	#NAME?	1	no	0	0.0356192	inf	1	no	#VALUE!	#NAME?	#NAME?	#VALUE!	no	no	no	no
ENSDARG00000091509	ENSDARG00000091509	ATP6AP1L (2 of 2)	chr11:43612219-43618494	0.0186868	0	#NAME?	1	no	0.0531671	0.0431397	-0.301519	1	no	0.0475086	0.0235253	-1.01398	1	no	0.0318437	0	#NAME?	1	no	#NAME?	0.301519	1.01398	#NAME?	no	no	no	no
ENSDARG00000070440	ENSDARG00000070440	ATP6V1C2	chr17:52181638-52205532	0.00659168	0	#NAME?	1	no	0.0577407	0.0129206	-2.15992	1	no	0.0515946	0.00839449	-2.61971	1	no	0.00950969	0	#NAME?	1	no	#NAME?	2.15992	2.61971	#NAME?	no	no	no	no
ENSDARG00000019013	ENSDARG00000019013	barhl1b	chr21:15990077-15994050	0	0.0178457	inf	1	no	0	0	0	1	no	0	0	0	1	no	0	0.0181896	inf	1	no	#VALUE!	0	0	#VALUE!	no	no	no	no
ENSDARG00000089545	ENSDARG00000089545	BEGAIN (2 of 2)	chr17:124076-138752	0.00453203	0	#NAME?	1	no	0.00730072	0.00974461	0.416566	1	no	0.0065234	0.00569311	-0.196409	1	no	0.00717214	0	#NAME?	1	no	#NAME?	-0.416566	0.196409	#NAME?	no	no	no	no
ENSDARG00000074990	ENSDARG00000074990	BEND4	chr14:48152189-48179524	0.0183919	0	#NAME?	1	no	0.00682382	0.0200844	1.55742	1	no	0.00609729	0.0232102	1.92852	1	no	0.0148059	0	#NAME?	1	no	#NAME?	-1.55742	-1.92852	#NAME?	no	no	no	no
ENSDARG00000079163	ENSDARG00000079163	best2	chr1:52657567-52665061	0.0107502	0	#NAME?	1	no	0.00801592	0.0371398	2.21202	1	no	0.00716312	0.0135198	0.916417	1	no	0.0273915	0	#NAME?	1	no	#NAME?	-2.21202	-0.916417	#NAME?	no	no	no	no
ENSDARG00000058039	ENSDARG00000058039	bhlhe22	chr24:25069288-25071294	0.00399786	0	#NAME?	1	no	0.034327	0.016888	-1.02335	1	no	0.0306726	0.00503309	-2.60743	1	no	0.0124493	0	#NAME?	1	no	#NAME?	1.02335	2.60743	#NAME?	no	no	no	no
ENSDARG00000068976	ENSDARG00000068976	bsx	chr10:30798055-30800297	0	0.00754065	inf	1	no	0	0	0	1	no	0	0	0	1	no	0	0.00768998	inf	1	no	#VALUE!	0	0	#VALUE!	no	no	no	no
ENSDARG00000035171	ENSDARG00000035171	btg4	chr5:59273721-59275804	0.0109351	0	#NAME?	1	no	0	0.0141675	inf	1	no	0	0.0137365	inf	1	no	0.0104578	0	#NAME?	1	no	#NAME?	#VALUE!	#VALUE!	#NAME?	no	no	no	no
ENSDARG00000087429	ENSDARG00000087429	BX004816.4	chr3:940774-982008	0.00231367	0	#NAME?	1	no	0.0609202	0.024536	-1.31202	1	no	0.0544351	0.00294646	-4.20748	1	no	0.0180822	0	#NAME?	1	no	#NAME?	1.31202	4.20748	#NAME?	no	no	no	no
ENSDARG00000079487	ENSDARG00000079487	BX004828.2	chr7:9035589-9042537	0.00917924	0	#NAME?	1	no	0	0	0	1	no	0	0.011556	inf	1	no	0	0	0	1	no	#NAME?	0	#VALUE!	0	no	no	no	no
ENSDARG00000067588	ENSDARG00000067588	BX004857.2	chr7:2327349-2328882	0	0.00795215	inf	1	no	0	0	0	1	no	0	0	0	1	no	0	0.00810962	inf	1	no	#VALUE!	0	0	#VALUE!	no	no	no	no
ENSDARG00000088089	ENSDARG00000088089	BX005073.1	chr7:48605325-48606050	0	0.0291887	inf	1	no	0	0.0677147	inf	1	no	0	0	0	1	no	0.0499838	0.029596	-0.756061	1	no	#VALUE!	#VALUE!	0	0.756061	no	no	no	no
ENSDARG00000079657	ENSDARG00000079657	BX005223.2	chr2:49041003-49045324	0.309061	0	#NAME?	1	no	1.75297	0.243986	-2.84493	1	no	1.5664	0.391817	-1.9992	1	no	0.179773	0	#NAME?	1	no	#NAME?	2.84493	1.9992	#NAME?	no	no	no	no
ENSDARG00000090406	ENSDARG00000090406	BX005265.1	chr5:35402757-35483098	0	0.0329989	inf	1	no	0	0.0556564	inf	1	no	0	0	0	1	no	0.0409637	0.0336254	-0.284795	1	no	#VALUE!	#VALUE!	0	0.284795	no	no	no	no
ENSDARG00000090395	ENSDARG00000090395	BX005290.1	chr6:6407827-6458334	2.16732	0	#NAME?	1	no	0	0	0	1	no	0	2.72045	inf	1	no	0	0	0	1	no	#NAME?	0	#VALUE!	0	no	no	no	no
ENSDARG00000089346	ENSDARG00000089346	BX005305.4	chr12:47585629-47586615	0.0354037	0	#NAME?	1	no	0	0	0	1	no	0	0.044474	inf	1	no	0	0	0	1	no	#NAME?	0	#VALUE!	0	no	no	no	no
ENSDARG00000089954	ENSDARG00000089954	BX005321.3	chr17:6372341-6377240	0	0.00404801	inf	1	no	0.00225481	0.00306344	0.442149	1	no	0.00201492	0	#NAME?	1	no	0.00225473	0.00412817	0.872548	1	no	#VALUE!	-0.442149	#NAME?	-0.872548	no	no	no	no
ENSDARG00000076358	ENSDARG00000076358	BX005329.1	chr22:5775229-5780203	0.0107467	0	#NAME?	1	no	0	0.0253858	inf	1	no	0	0.0136859	inf	1	no	0.0187386	0	#NAME?	1	no	#NAME?	#VALUE!	#VALUE!	#NAME?	no	no	no	no
ENSDARG00000060655	ENSDARG00000060655	BX005421.4	chr3:4543868-4546127	0	0.00402981	inf	1	no	0.0226877	0.0121987	-0.895183	1	no	0.0202729	0	#NAME?	1	no	0.00897838	0.00410961	-1.12745	1	no	#VALUE!	0.895183	#NAME?	1.12745	no	no	no	no
ENSDARG00000052872	ENSDARG00000052872	BX005442.1	chr3:3163277-3176894	0	0.0152581	inf	1	no	0.00685837	0	#NAME?	1	no	0.00612872	0	#NAME?	1	no	0	0.0155184	inf	1	no	#VALUE!	#NAME?	#NAME?	#VALUE!	no	no	no	no
ENSDARG00000088058	ENSDARG00000088058	BX119909.1	chr6:8444746-8542728	0	0.0230702	inf	1	no	0.0151881	0.0206349	0.442149	1	no	0.0135723	0	#NAME?	1	no	0.0151876	0.0234971	0.629592	1	no	#VALUE!	-0.442149	#NAME?	-0.629592	no	no	no	no
ENSDARG00000093027	ENSDARG00000093027	BX119910.15	chr10:21770732-21773977	0.00891809	0	#NAME?	1	no	0	0	0	1	no	0	0.0113572	inf	1	no	0	0	0	1	no	#NAME?	0	#VALUE!	0	no	no	no	no
ENSDARG00000074145	ENSDARG00000074145	BX119910.4	chr10:21858703-21861407	0	0.00668261	inf	1	no	0.0118579	0.00639543	-0.890739	1	no	0.0105957	0	#NAME?	1	no	0.00472081	0.00682337	0.53145	1	no	#VALUE!	0.890739	#NAME?	-0.53145	no	no	no	no
ENSDARG00000088126	ENSDARG00000088126	BX119963.2	chr4:12073203-12088567	0.0132792	0	#NAME?	1	no	0	0	0	1	no	0	0.0167175	inf	1	no	0	0	0	1	no	#NAME?	0	#VALUE!	0	no	no	no	no
ENSDARG00000086517	ENSDARG00000086517	BX248122.2	chr4:28857223-28858109	0	0.0129088	inf	1	no	0	0	0	1	no	0	0	0	1	no	0	0.0131644	inf	1	no	#VALUE!	0	0	#VALUE!	no	no	no	no
ENSDARG00000015144	ENSDARG00000015144	BX248124.1	chr12:30838174-30853381	0	0.0185494	inf	1	no	0.0166756	0.0386311	1.21202	1	no	0.0149015	0	#NAME?	1	no	0.0284914	0.0188658	-0.59475	1	no	#VALUE!	-1.21202	#NAME?	0.59475	no	no	no	no
ENSDARG00000088732	ENSDARG00000088732	BX284640.1	chr1:55879043-55879346	0.115511	0	#NAME?	1	no	0.439011	0	#NAME?	1	no	0.392291	0.14615	-1.42447	1	no	0	0	0	1	no	#NAME?	#NAME?	1.42447	0	no	no	no	no
ENSDARG00000093944	ENSDARG00000093944	BX321871.2	chr4:55100104-55318087	0	0.00931008	inf	1	no	0	0.0140915	inf	1	no	0	0	0	1	no	0.0103716	0.00949445	-0.127481	1	no	#VALUE!	#VALUE!	0	0.127481	no	no	no	no
ENSDARG00000088894	ENSDARG00000088894	BX321873.1	chr5:54168992-54275750	0	0.00867606	inf	1	no	0	0	0	1	no	0	0	0	1	no	0	0.00887089	inf	1	no	#VALUE!	0	0	#VALUE!	no	no	no	no
ENSDARG00000041404	ENSDARG00000041404	BX323089.1	chr3:51274358-51313515	0.00620877	0	#NAME?	1	no	0.0132096	0.0131135	-0.0105329	1	no	0.0118039	0.00781638	-0.594693	1	no	0.00966707	0	#NAME?	1	no	#NAME?	0.0105329	0.594693	#NAME?	no	no	no	no
ENSDARG00000071880	ENSDARG00000071880	BX323449.3	chr14:8692793-8693953	0	0.0126742	inf	1	no	0.0158646	0.0211752	0.416566	1	no	0.0141755	0	#NAME?	1	no	0.0155852	0.0129589	-0.266239	1	no	#VALUE!	-0.416566	#NAME?	0.266239	no	no	no	no
ENSDARG00000080292	ENSDARG00000080292	BX323557.1	chr5:29941798-29952019	0	5.83358	inf	0.22055	no	0	11.2298	inf	0.24475	no	0	0	0	1	no	8.26526	5.91497	-0.482688	0.70695	no	#VALUE!	#VALUE!	0	0.482688	no	no	no	no
ENSDARG00000089539	ENSDARG00000089539	BX323560.1	chr4:29412958-29414157	0.0123638	0	#NAME?	1	no	0	0.015278	inf	1	no	0	0.0156432	inf	1	no	0.0112775	0	#NAME?	1	no	#NAME?	#VALUE!	#VALUE!	#NAME?	no	no	no	no
ENSDARG00000076286	ENSDARG00000076286	BX323987.2	chr7:3157436-3186200	0.220135	0	#NAME?	1	no	0	0.0229905	inf	1	no	0	0.277082	inf	1	no	0.0169705	0	#NAME?	1	no	#NAME?	#VALUE!	#VALUE!	#NAME?	no	no	no	no
ENSDARG00000087961	ENSDARG00000087961	BX465186.1	chr10:21440455-21443248	0	0.026462	inf	1	no	0.117918	0.0482672	-1.28867	1	no	0.105373	0	#NAME?	1	no	0.0356286	0.026986	-0.400825	1	no	#VALUE!	1.28867	#NAME?	0.400825	no	no	no	no
ENSDARG00000090265	ENSDARG00000090265	BX465203.3	chr14:24503487-24504450	0.0328102	0	#NAME?	1	no	0	0	0	1	no	0	0.0416621	inf	1	no	0	0	0	1	no	#NAME?	0	#VALUE!	0	no	no	no	no
ENSDARG00000089827	ENSDARG00000089827	BX465848.1	Zv9_scaffold3555:42090-89208	0	0.0161812	inf	1	no	0.00693831	0.0207867	1.58301	1	no	0.00620016	0	#NAME?	1	no	0.0153236	0.016503	0.106968	1	no	#VALUE!	-1.58301	#NAME?	-0.106968	no	no	no	no
ENSDARG00000094226	ENSDARG00000094226	BX470188.1	chr20:43599743-43602807	0.00589477	0	#NAME?	1	no	0	0	0	1	no	0	0.00750697	inf	1	no	0	0	0	1	no	#NAME?	0	#VALUE!	0	no	no	no	no
ENSDARG00000087523	ENSDARG00000087523	BX470224.2	chr5:23066248-23066949	0	0.0532335	inf	1	no	0	0	0	1	no	0	0	0	1	no	0	0.0542877	inf	1	no	#VALUE!	0	0	#VALUE!	no	no	no	no
ENSDARG00000076665	ENSDARG00000076665	BX510915.1	chr2:14312206-14432336	0.00367096	0	#NAME?	1	no	0.00529621	0	#NAME?	1	no	0.00473276	0.00467496	-0.0177271	1	no	0	0	0	1	no	#NAME?	#NAME?	0.0177271	0	no	no	no	no
ENSDARG00000094565	ENSDARG00000094565	BX511066.4	chr4:41837053-41946895	0.0206855	0	#NAME?	1	no	0.0311244	0.0252542	-0.301519	1	no	0.0278118	0.0260148	-0.0963635	1	no	0.0186415	0	#NAME?	1	no	#NAME?	0.301519	0.0963635	#NAME?	no	no	no	no
ENSDARG00000070755	ENSDARG00000070755	BX511173.1	chr16:8917190-8918225	0	0.00798811	inf	1	no	0.0569964	0.0741263	0.379113	1	no	0.0509308	0	#NAME?	1	no	0.0547166	0.00809957	-2.75606	1	no	#VALUE!	-0.379113	#NAME?	2.75606	no	no	no	no
ENSDARG00000089876	ENSDARG00000089876	BX511270.1	chr14:13711342-13783237	0	0.0150061	inf	1	no	0.0108212	0	#NAME?	1	no	0.00966906	0	#NAME?	1	no	0	0.0152155	inf	1	no	#VALUE!	#NAME?	#NAME?	#VALUE!	no	no	no	no
ENSDARG00000094755	ENSDARG00000094755	BX530037.6	chr10:41781166-41782164	0.0064739	0	#NAME?	1	no	0.00433913	0.0367108	3.08073	1	no	0.00397667	0.00549318	0.466081	1	no	0.0270711	0	#NAME?	1	no	#NAME?	-3.08073	-0.466081	#NAME?	no	no	no	no
ENSDARG00000094786	ENSDARG00000094786	BX530037.7	chr10:41868474-41869500	0	0.00779355	inf	1	no	0	0	0	1	no	0	0	0	1	no	0	0.00789916	inf	1	no	#VALUE!	0	0	#VALUE!	no	no	no	no
ENSDARG00000067697	ENSDARG00000067697	BX537120.1	Zv9_scaffold3533:203169-221456	0	0.00886459	inf	1	no	0	0	0	1	no	0	0	0	1	no	0	0.00898828	inf	1	no	#VALUE!	0	0	#VALUE!	no	no	no	no
ENSDARG00000089736	ENSDARG00000089736	BX537277.3	chr6:24135945-24136682	0.0131962	0	#NAME?	1	no	0	0	0	1	no	0	0.016613	inf	1	no	0	0	0	1	no	#NAME?	0	#VALUE!	0	no	no	no	no
ENSDARG00000088907	ENSDARG00000088907	BX539341.1	chr22:31037358-31039296	0.00598045	0	#NAME?	1	no	0	0	0	1	no	0	0.00752894	inf	1	no	0	0	0	1	no	#NAME?	0	#VALUE!	0	no	no	no	no
ENSDARG00000039065	ENSDARG00000039065	BX571707.1	chr15:37037796-37058577	0.0133918	0	#NAME?	1	no	0.115077	0.543903	2.24075	1	no	0.102828	0.0168792	-2.60691	1	no	0.400846	0	#NAME?	1	no	#NAME?	-2.24075	2.60691	#NAME?	no	no	no	no
ENSDARG00000086986	ENSDARG00000086986	BX571712.3	chr17:31153827-31155321	0.00825305	0	#NAME?	1	no	0	0	0	1	no	0	0.0105102	inf	1	no	0	0	0	1	no	#NAME?	0	#VALUE!	0	no	no	no	no
ENSDARG00000076046	ENSDARG00000076046	BX571823.3	chr24:9795806-9798678	4.87693e-07	0	#NAME?	1	no	0	0.0129616	inf	1	no	0	6.12637e-07	inf	1	no	0.00956755	0	#NAME?	1	no	#NAME?	#VALUE!	#VALUE!	#NAME?	no	no	no	no
ENSDARG00000053117	ENSDARG00000053117	BX571840.1	chr25:6415542-6435581	0	0.00423533	inf	1	no	0	0	0	1	no	0	0	0	1	no	0	0.00429442	inf	1	no	#VALUE!	0	0	#VALUE!	no	no	no	no
ENSDARG00000093220	ENSDARG00000093220	BX571878.2	chr4:32140110-32145733	0.0394017	0	#NAME?	1	no	0.0116734	0.0508327	2.12253	1	no	0.0104315	0.0496815	2.25176	1	no	0.0374544	0	#NAME?	1	no	#NAME?	-2.12253	-2.25176	#NAME?	no	no	no	no
ENSDARG00000095658	ENSDARG00000095658	BX572103.4	Zv9_scaffold3530:784949-801038	0.00896341	0	#NAME?	1	no	0.0274224	0	#NAME?	1	no	0.0245033	0.0113409	-1.11144	1	no	0	0	0	1	no	#NAME?	#NAME?	1.11144	0	no	no	no	no
ENSDARG00000095738	ENSDARG00000095738	BX649331.2	Zv9_scaffold3530:328203-334513	0.00790517	0	#NAME?	1	no	0.0116091	0.0186736	0.685746	1	no	0.0103731	0.0100672	-0.0431759	1	no	0.013784	0	#NAME?	1	no	#NAME?	-0.685746	0.0431759	#NAME?	no	no	no	no
ENSDARG00000058362	ENSDARG00000058362	BX649391.1	chr5:17620289-17625607	0	0.0459038	inf	1	no	0.0286289	0.0857703	1.58301	1	no	0.0255831	0	#NAME?	1	no	0.0632283	0.0466946	-0.437316	1	no	#VALUE!	-1.58301	#NAME?	0.437316	no	no	no	no
ENSDARG00000091583	ENSDARG00000091583	BX649415.3	chr17:12077037-12079802	0.192673	0	#NAME?	1	no	0.116208	0.0934621	-0.314254	1	no	0.103835	0.242941	1.22631	1	no	0.0689894	0	#NAME?	1	no	#NAME?	0.314254	-1.22631	#NAME?	no	no	no	no
ENSDARG00000089132	ENSDARG00000089132	BX649490.1	chr22:33282814-33290185	0.013143	0	#NAME?	1	no	0	0	0	1	no	0	0.0167376	inf	1	no	0	0	0	1	no	#NAME?	0	#VALUE!	0	no	no	no	no
ENSDARG00000091701	ENSDARG00000091701	BX649556.4	Zv9_scaffold3530:141058-153860	0	0.015964	inf	1	no	0.0473234	0.025355	-0.900282	1	no	0.0422856	0	#NAME?	1	no	0.0186616	0.0163003	-0.195177	1	no	#VALUE!	0.900282	#NAME?	0.195177	no	no	no	no
ENSDARG00000086368	ENSDARG00000086368	BX663505.1	chr4:33966265-34000005	0.00249522	0	#NAME?	1	no	0.00709935	0.0153202	1.10968	1	no	0.00634377	0.0031413	-1.01398	1	no	0.0112882	0	#NAME?	1	no	#NAME?	-1.10968	1.01398	#NAME?	no	no	no	no
ENSDARG00000002738	ENSDARG00000002738	BX663519.1	chr15:20479561-20480208	0.0217242	0	#NAME?	1	no	0	0	0	1	no	0	0.0276657	inf	1	no	0	0	0	1	no	#NAME?	0	#VALUE!	0	no	no	no	no
ENSDARG00000087911	ENSDARG00000087911	BX663524.2	chr13:35928535-35963203	0.00466741	0	#NAME?	1	no	0	0	0	1	no	0	0.00594394	inf	1	no	0	0	0	1	no	#NAME?	0	#VALUE!	0	no	no	no	no
ENSDARG00000087444	ENSDARG00000087444	BX664625.1	chr22:9884472-9885327	0	0.0156187	inf	1	no	0.0195502	0.0314472	0.685746	1	no	0.0174687	0	#NAME?	1	no	0.0232129	0.0159694	-0.539612	1	no	#VALUE!	-0.685746	#NAME?	0.539612	no	no	no	no
ENSDARG00000089184	ENSDARG00000089184	BX664625.2	chr22:9875419-9878207	0.0198435	0	#NAME?	1	no	0.0286289	0	#NAME?	1	no	0.0255831	0.0252707	-0.0177271	1	no	0	0	0	1	no	#NAME?	#NAME?	0.0177271	0	no	no	no	no
ENSDARG00000059491	ENSDARG00000059491	BX682552.1	chr3:47615525-47616461	0.00770868	0	#NAME?	1	no	0.0121998	0	#NAME?	1	no	0.0109019	0.0096836	-0.17096	1	no	0	0	0	1	no	#NAME?	#NAME?	0.17096	0	no	no	no	no
ENSDARG00000090658	ENSDARG00000090658	BX890548.2	chr4:58027429-58028425	0	0.0101212	inf	1	no	0	0	0	1	no	0	0	0	1	no	0	0.0103217	inf	1	no	#VALUE!	0	0	#VALUE!	no	no	no	no
ENSDARG00000092994	ENSDARG00000092994	BX897720.4	chr4:50314644-50629702	0.00733039	0	#NAME?	1	no	0.0729044	0.12098	0.730687	1	no	0.0651456	0.00922841	-2.81951	1	no	0.0891512	0	#NAME?	1	no	#NAME?	-0.730687	2.81951	#NAME?	no	no	no	no
ENSDARG00000091808	ENSDARG00000091808	BX897726.2	chr4:50314644-50629702	0	0.00685708	inf	1	no	0.0337291	0	#NAME?	1	no	0.0301408	0	#NAME?	1	no	0	0.00701106	inf	1	no	#VALUE!	#NAME?	#NAME?	#VALUE!	no	no	no	no
ENSDARG00000090415	ENSDARG00000090415	BX897747.3	chr7:2877106-2879068	0.0103324	0	#NAME?	1	no	0.143038	0.00831637	-4.1043	1	no	0.127816	0.0130503	-3.29192	1	no	0.00613876	0	#NAME?	1	no	#NAME?	4.1043	3.29192	#NAME?	no	no	no	no
ENSDARG00000091721	ENSDARG00000091721	BX897747.3	chr7:2921386-2924785	0.0019821	0	#NAME?	1	no	0.019663	0.00457582	-2.10338	1	no	0.0175706	0.00249532	-2.81587	1	no	0.00337766	0	#NAME?	1	no	#NAME?	2.10338	2.81587	#NAME?	no	no	no	no
ENSDARG00000077036	ENSDARG00000077036	BX901889.3	chr2:36220718-36221180	0.0865927	0	#NAME?	1	no	0	0	0	1	no	0	0.108777	inf	1	no	0	0	0	1	no	#NAME?	0	#VALUE!	0	no	no	no	no
ENSDARG00000069197	ENSDARG00000069197	BX908759.1	chr1:57822554-57830576	0.0627841	0	#NAME?	1	no	0.06657	0	#NAME?	1	no	0.0594838	0.0795447	0.419268	1	no	0	0	0	1	no	#NAME?	#NAME?	-0.419268	0	no	no	no	no
ENSDARG00000053649	ENSDARG00000053649	BX927082.1	chr7:30839381-30842644	0.00870583	0	#NAME?	1	no	0	0	0	1	no	0	0.0110868	inf	1	no	0	0	0	1	no	#NAME?	0	#VALUE!	0	no	no	no	no
ENSDARG00000090307	ENSDARG00000090307	BX927212.2	chr5:66266332-66270187	0.00964038	0	#NAME?	1	no	0.0135927	0.0184674	0.442149	1	no	0.0121466	0.0121365	-0.00119725	1	no	0.0135922	0	#NAME?	1	no	#NAME?	-0.442149	0.00119725	#NAME?	no	no	no	no
ENSDARG00000071140	ENSDARG00000071140	BX927308.1	chr22:27778598-27779374	0	0.0184324	inf	1	no	0	0	0	1	no	0	0	0	1	no	0	0.0186896	inf	1	no	#VALUE!	0	0	#VALUE!	no	no	no	no
ENSDARG00000090037	ENSDARG00000090037	BX927317.3	chr3:7992097-7994188	0.0482569	0	#NAME?	1	no	0.0143606	0	#NAME?	1	no	0.0128316	0.0611549	2.25277	1	no	0	0	0	1	no	#NAME?	#NAME?	-2.25277	0	no	no	no	no
ENSDARG00000055941	ENSDARG00000055941	BX936450.1	chr17:6891506-6901577	0	0.00942122	inf	1	no	0	0	0	1	no	0	0	0	1	no	0	0.00955267	inf	1	no	#VALUE!	0	0	#VALUE!	no	no	no	no
ENSDARG00000086767	ENSDARG00000086767	BX957252.1	chr4:61510932-61813255	0	0.00622851	inf	1	no	0.00706244	0.0207904	1.55768	1	no	0.0063105	0	#NAME?	1	no	0.0153271	0.00635189	-1.27082	1	no	#VALUE!	-1.55768	#NAME?	1.27082	no	no	no	no
ENSDARG00000090981	ENSDARG00000090981	C14HXorf65	chr14:31825795-31830142	0.0215482	0	#NAME?	1	no	0.0922342	0	#NAME?	1	no	0.0824165	0.0271275	-1.60318	1	no	0	0	0	1	no	#NAME?	#NAME?	1.60318	0	no	no	no	no
ENSDARG00000095394	ENSDARG00000095394	C18H15orf60 (2 of 2)	chr18:945257-1028757	0.0770011	0	#NAME?	1	no	0	0	0	1	no	0	0.0976749	inf	1	no	0	0	0	1	no	#NAME?	0	#VALUE!	0	no	no	no	no
ENSDARG00000095802	ENSDARG00000095802	C20H2orf71 (2 of 2)	chr20:127250-134087	0.00613956	0	#NAME?	1	no	0.0254363	0.00513696	-2.3079	1	no	0.0227286	0.00775011	-1.55222	1	no	0.00379187	0	#NAME?	1	no	#NAME?	2.3079	1.55222	#NAME?	no	no	no	no
ENSDARG00000087663	ENSDARG00000087663	C24H16orf11	chr24:39499382-39515607	0.00136381	0	#NAME?	1	no	0.0043509	0.00699857	0.685746	1	no	0.00388762	0.00173681	-1.16245	1	no	0.00516602	0	#NAME?	1	no	#NAME?	-0.685746	1.16245	#NAME?	no	no	no	no
ENSDARG00000037656	ENSDARG00000037656	C2orf71 (1 of 2)	chr17:47971670-47975998	0.0021084	0	#NAME?	1	no	0.0169823	0	#NAME?	1	no	0.0151742	0.00264856	-2.51834	1	no	0	0	0	1	no	#NAME?	#NAME?	2.51834	0	no	no	no	no
ENSDARG00000033411	ENSDARG00000033411	cabp1b	chr10:42773820-42814933	0.0161883	0	#NAME?	1	no	0.0321467	0.0258545	-0.314254	1	no	0.028724	0.0203662	-0.496081	1	no	0.0190846	0	#NAME?	1	no	#NAME?	0.314254	0.496081	#NAME?	no	no	no	no
ENSDARG00000008866	ENSDARG00000008866	CABP4	chr8:14316529-14340049	0	0.0318622	inf	1	no	0.0391816	0	#NAME?	1	no	0.0350132	0	#NAME?	1	no	0	0.0325777	inf	1	no	#VALUE!	#NAME?	#NAME?	#VALUE!	no	no	no	no
ENSDARG00000095262	ENSDARG00000095262	CABZ01008480.1	chr4:35429298-35436565	0	0.00719466	inf	1	no	0	0.0138499	inf	1	no	0	0	0	1	no	0.0101937	0.00729505	-0.482688	1	no	#VALUE!	#VALUE!	0	0.482688	no	no	no	no
ENSDARG00000090601	ENSDARG00000090601	CABZ01010191.1	chr22:6783600-6785929	0	0.0447367	inf	1	no	0.111011	0	#NAME?	1	no	0.0991964	0	#NAME?	1	no	0	0.0457413	inf	1	no	#VALUE!	#NAME?	#NAME?	#VALUE!	no	no	no	no
ENSDARG00000091406	ENSDARG00000091406	CABZ01013481.2	chr3:58085160-58090049	0.0289385	0	#NAME?	1	no	0.22981	0	#NAME?	1	no	0.205357	0.0363524	-2.49801	1	no	0	0	0	1	no	#NAME?	#NAME?	2.49801	0	no	no	no	no
ENSDARG00000087521	ENSDARG00000087521	CABZ01019476.1	Zv9_NA51:35482-36223	0.0115273	0	#NAME?	1	no	0	0	0	1	no	0	0.01468	inf	1	no	0	0	0	1	no	#NAME?	0	#VALUE!	0	no	no	no	no
ENSDARG00000090691	ENSDARG00000090691	CABZ01024333.1	Zv9_NA200:1942-10546	0.141187	0	#NAME?	1	no	1.1372	0	#NAME?	1	no	1.01612	0.177358	-2.51834	1	no	0	0	0	1	no	#NAME?	#NAME?	2.51834	0	no	no	no	no
ENSDARG00000069754	ENSDARG00000069754	CABZ01025474.1	chr1:34631127-34634685	0	0.00960579	inf	1	no	0	0	0	1	no	0	0	0	1	no	0	0.0098215	inf	1	no	#VALUE!	0	0	#VALUE!	no	no	no	no
ENSDARG00000058547	ENSDARG00000058547	CABZ01029334.1	chr19:11148972-11150089	0.00694054	0	#NAME?	1	no	0	0.0179844	inf	1	no	0	0.00871867	inf	1	no	0.0132753	0	#NAME?	1	no	#NAME?	#VALUE!	#VALUE!	#NAME?	no	no	no	no
ENSDARG00000068178	ENSDARG00000068178	CABZ01029886.1	chr3:1692500-1705604	0.0496851	0	#NAME?	1	no	0	0.114701	inf	1	no	0	0.0625498	inf	1	no	0.0846672	0	#NAME?	1	no	#NAME?	#VALUE!	#VALUE!	#NAME?	no	no	no	no
ENSDARG00000089056	ENSDARG00000089056	CABZ01033581.1	Zv9_NA383:689-7646	0	0.0156187	inf	1	no	1.66345	2.6302	0.660991	1	no	1.48643	0	#NAME?	1	no	1.93842	0.0159694	-6.92342	1	no	#VALUE!	-0.660991	#NAME?	6.92342	no	no	no	no
ENSDARG00000071666	ENSDARG00000071666	CABZ01034691.1	chr22:7959794-7964085	0.027018	0	#NAME?	1	no	0	0	0	1	no	0	0.0341844	inf	1	no	0	0	0	1	no	#NAME?	0	#VALUE!	0	no	no	no	no
ENSDARG00000086584	ENSDARG00000086584	CABZ01034692.1	chr22:7976452-7978932	0	0.0139146	inf	1	no	0	0	0	1	no	0	0	0	1	no	0	0.0141088	inf	1	no	#VALUE!	0	0	#VALUE!	no	no	no	no
ENSDARG00000058659	ENSDARG00000058659	CABZ01034698.1	chr22:8051970-8072044	0	0.0228361	inf	1	no	0	0	0	1	no	0	0	0	1	no	0	0.0233273	inf	1	no	#VALUE!	0	0	#VALUE!	no	no	no	no
ENSDARG00000088218	ENSDARG00000088218	CABZ01035080.1	Zv9_NA609:897-53002	0.0223182	0	#NAME?	1	no	0.0228101	0.0309904	0.442149	1	no	0.0203834	0.0281728	0.466909	1	no	0.0228093	0	#NAME?	1	no	#NAME?	-0.442149	-0.466909	#NAME?	no	no	no	no
ENSDARG00000087288	ENSDARG00000087288	CABZ01036080.1	chr4:56839413-56840624	0	0.00750305	inf	1	no	0.064737	0.081106	0.325216	1	no	0.0578453	0	#NAME?	1	no	0.0598068	0.00760774	-2.97477	1	no	#VALUE!	-0.325216	#NAME?	2.97477	no	no	no	no
ENSDARG00000012263	ENSDARG00000012263	CABZ01036814.1	chr1:56517095-56534610	0	0.00600227	inf	1	no	0.00850456	0	#NAME?	1	no	0.00759978	0	#NAME?	1	no	0	0.00608602	inf	1	no	#VALUE!	#NAME?	#NAME?	#VALUE!	no	no	no	no
ENSDARG00000086938	ENSDARG00000086938	CABZ01036821.1	chr1:56636768-56639220	0	0.225479	inf	1	no	0.895967	0	#NAME?	1	no	0.800622	0	#NAME?	1	no	0	0.229652	inf	1	no	#VALUE!	#NAME?	#NAME?	#VALUE!	no	no	no	no
ENSDARG00000080466	ENSDARG00000080466	CABZ01039784.1	chr18:25831822-25880477	0	3.32635	inf	1	no	0	0	0	1	no	0	0	0	1	no	0	3.39223	inf	1	no	#VALUE!	0	0	#VALUE!	no	no	no	no
ENSDARG00000091268	ENSDARG00000091268	CABZ01041769.3	chr25:7872372-7873238	0	0.0565115	inf	1	no	0.192246	0	#NAME?	1	no	0.171778	0	#NAME?	1	no	0	0.0576306	inf	1	no	#VALUE!	#NAME?	#NAME?	#VALUE!	no	no	no	no
ENSDARG00000091074	ENSDARG00000091074	CABZ01043557.1	chr24:12745005-12745891	0.0135755	0	#NAME?	1	no	0.0195858	0	#NAME?	1	no	0.0175021	0.0172884	-0.0177271	1	no	0	0	0	1	no	#NAME?	#NAME?	0.0177271	0	no	no	no	no
ENSDARG00000093556	ENSDARG00000093556	CABZ01044569.1	chr4:60505669-60515520	0.00408534	0	#NAME?	1	no	0	0	0	1	no	0	0.00520267	inf	1	no	0	0	0	1	no	#NAME?	0	#VALUE!	0	no	no	no	no
ENSDARG00000086420	ENSDARG00000086420	CABZ01046949.1	chr12:39477404-39478529	0.00612656	0	#NAME?	1	no	0.00986938	0	#NAME?	1	no	0.00881858	0.00769615	-0.196409	1	no	0	0	0	1	no	#NAME?	#NAME?	0.196409	0	no	no	no	no
ENSDARG00000090313	ENSDARG00000090313	CABZ01047284.1	Zv9_NA892:857-6828	0	0.027253	inf	1	no	0	0.020057	inf	1	no	0	0	0	1	no	0.0148052	0.0277179	0.904717	1	no	#VALUE!	#VALUE!	0	-0.904717	no	no	no	no
ENSDARG00000091745	ENSDARG00000091745	CABZ01055591.1	chr2:4989925-4999272	0.0151711	0	#NAME?	1	no	0.0480196	0.0393115	-0.288671	1	no	0.0429109	0.0190579	-1.17096	1	no	0.029018	0	#NAME?	1	no	#NAME?	0.288671	1.17096	#NAME?	no	no	no	no
ENSDARG00000070223	ENSDARG00000070223	CABZ01058865.2	chr1:58120593-58123873	0.0159322	0	#NAME?	1	no	0.00870352	0	#NAME?	1	no	0.00777758	0.0202897	1.38335	1	no	0	0	0	1	no	#NAME?	#NAME?	-1.38335	0	no	no	no	no
ENSDARG00000057850	ENSDARG00000057850	CABZ01058868.1	chr1:58055209-58056356	0.00758433	0	#NAME?	1	no	0	0.0359602	inf	1	no	0	0.00952739	inf	1	no	0.0265092	0	#NAME?	1	no	#NAME?	#VALUE!	#VALUE!	#NAME?	no	no	no	no
ENSDARG00000088761	ENSDARG00000088761	CABZ01058871.1	chr1:58026123-58026424	1.8553	0	#NAME?	1	no	0.886485	0.719292	-0.301519	1	no	0.792137	2.34456	1.5655	1	no	0.530948	0	#NAME?	1	no	#NAME?	0.301519	-1.5655	#NAME?	no	no	no	no
ENSDARG00000093880	ENSDARG00000093880	CABZ01058873.4	chr1:57961174-57963560	0.0054995	0	#NAME?	1	no	0	0	0	1	no	0	0.00690844	inf	1	no	0	0	0	1	no	#NAME?	0	#VALUE!	0	no	no	no	no
ENSDARG00000087005	ENSDARG00000087005	CABZ01059415.1	chr1:57172756-57190333	0.0148366	0	#NAME?	1	no	0.0284737	0.0221097	-0.36495	1	no	0.0254428	0.0187936	-0.437015	1	no	0.016284	0	#NAME?	1	no	#NAME?	0.36495	0.437015	#NAME?	no	no	no	no
ENSDARG00000090867	ENSDARG00000090867	CABZ01060296.1	chr1:41941655-41955238	0.00191907	0	#NAME?	1	no	0.00309146	0	#NAME?	1	no	0.00276231	0.00241072	-0.196409	1	no	0	0	0	1	no	#NAME?	#NAME?	0.196409	0	no	no	no	no
ENSDARG00000086035	ENSDARG00000086035	CABZ01062563.1	chr9:55433755-55435129	0	0.0599394	inf	1	no	0	0	0	1	no	0	0	0	1	no	0	0.0607757	inf	1	no	#VALUE!	0	0	#VALUE!	no	no	no	no
ENSDARG00000089059	ENSDARG00000089059	CABZ01063077.1	chr21:40910591-40914640	0.0505505	0	#NAME?	1	no	0	0.051211	inf	1	no	0	0.0635743	inf	1	no	0.0376919	0	#NAME?	1	no	#NAME?	#VALUE!	#VALUE!	#NAME?	no	no	no	no
ENSDARG00000089402	ENSDARG00000089402	CABZ01063841.1	chr19:16753811-16754370	0	0.193214	inf	1	no	0.120502	0.163718	0.442149	1	no	0.107682	0	#NAME?	1	no	0.120498	0.196543	0.705836	1	no	#VALUE!	-0.442149	#NAME?	-0.705836	no	no	no	no
ENSDARG00000090310	ENSDARG00000090310	CABZ01065328.1	chr22:6868834-6870155	0.0273071	0	#NAME?	1	no	0.027546	0	#NAME?	1	no	0.0246131	0.0346276	0.492496	1	no	0	0	0	1	no	#NAME?	#NAME?	-0.492496	0	no	no	no	no
ENSDARG00000087350	ENSDARG00000087350	CABZ01068244.1	chr15:44212184-44215015	0.105576	0	#NAME?	1	no	0.65436	0.0670629	-3.2865	1	no	0.584719	0.133022	-2.13608	1	no	0.0494376	0	#NAME?	1	no	#NAME?	3.2865	2.13608	#NAME?	no	no	no	no
ENSDARG00000078176	ENSDARG00000078176	CABZ01070468.1	chr8:54732031-54742645	0	0.0418943	inf	1	no	0	0.0335264	inf	1	no	0	0	0	1	no	0.0247151	0.0426336	0.7866	1	no	#VALUE!	#VALUE!	0	-0.7866	no	no	no	no
ENSDARG00000069222	ENSDARG00000069222	CABZ01070637.1	chr1:56961726-56966120	0.0674045	0	#NAME?	1	no	0.0425769	0.0191677	-1.15139	1	no	0.038046	0.0850936	1.1613	1	no	0.0141077	0	#NAME?	1	no	#NAME?	1.15139	-1.1613	#NAME?	no	no	no	no
ENSDARG00000068026	ENSDARG00000068026	CABZ01071153.1	chr8:53175954-53208163	0.0102231	0	#NAME?	1	no	0.0146721	0.0118003	-0.314254	1	no	0.01311	0.0128701	-0.0266461	1	no	0.00871045	0	#NAME?	1	no	#NAME?	0.314254	0.0266461	#NAME?	no	no	no	no
ENSDARG00000087200	ENSDARG00000087200	CABZ01071224.1	chr16:58281197-58281858	0.145035	0	#NAME?	1	no	0.620805	0.277833	-1.15992	1	no	0.554724	0.182588	-1.60318	1	no	0.204489	0	#NAME?	1	no	#NAME?	1.15992	1.60318	#NAME?	no	no	no	no
ENSDARG00000076973	ENSDARG00000076973	CABZ01071489.1	chr18:48914626-48938260	0	0.00255658	inf	1	no	0.0036872	0	#NAME?	1	no	0.00329462	0	#NAME?	1	no	0	0.00259225	inf	1	no	#VALUE!	#NAME?	#NAME?	#VALUE!	no	no	no	no
ENSDARG00000077007	ENSDARG00000077007	CABZ01071494.1	chr18:48901845-48914144	0	0.00488984	inf	1	no	0.0122414	0	#NAME?	1	no	0.0109381	0	#NAME?	1	no	0	0.00499965	inf	1	no	#VALUE!	#NAME?	#NAME?	#VALUE!	no	no	no	no
ENSDARG00000087003	ENSDARG00000087003	CABZ01071642.2	Zv9_NA428:31422-130220	0.182281	0	#NAME?	1	no	0.51862	0.349182	-0.570699	1	no	0.463424	0.229478	-1.01398	1	no	0.257002	0	#NAME?	1	no	#NAME?	0.570699	1.01398	#NAME?	no	no	no	no
ENSDARG00000088154	ENSDARG00000088154	CABZ01072971.1	Zv9_scaffold3556:60350-63735	0.0397383	0	#NAME?	1	no	0.398224	0.243986	-0.706782	1	no	0.35583	0.0500276	-2.83039	1	no	0.179773	0	#NAME?	1	no	#NAME?	0.706782	2.83039	#NAME?	no	no	no	no
ENSDARG00000090240	ENSDARG00000090240	CABZ01073389.1	Zv9_NA551:27557-29779	0.0521985	0	#NAME?	1	no	0	0	0	1	no	0	0.0660899	inf	1	no	0	0	0	1	no	#NAME?	0	#VALUE!	0	no	no	no	no
ENSDARG00000078791	ENSDARG00000078791	CABZ01077217.1	chr22:8348277-8349747	0.00493572	0	#NAME?	1	no	0	0	0	1	no	0	0.00628563	inf	1	no	0	0	0	1	no	#NAME?	0	#VALUE!	0	no	no	no	no
ENSDARG00000089370	ENSDARG00000089370	CABZ01077221.1	chr22:8263739-8269452	0.0184256	0	#NAME?	1	no	0	0	0	1	no	0	0.023465	inf	1	no	0	0	0	1	no	#NAME?	0	#VALUE!	0	no	no	no	no
ENSDARG00000081883	ENSDARG00000081883	CABZ01078244.2	chr9:55420610-55420732	2.84145	0	#NAME?	1	no	0	0	0	1	no	0	3.57352	inf	1	no	0	0	0	1	no	#NAME?	0	#VALUE!	0	no	no	no	no
ENSDARG00000091296	ENSDARG00000091296	CABZ01078520.1	chr9:50020918-50021872	0.00844479	0	#NAME?	1	no	0	0	0	1	no	0	0.0106314	inf	1	no	0	0	0	1	no	#NAME?	0	#VALUE!	0	no	no	no	no
ENSDARG00000042178	ENSDARG00000042178	CABZ01079166.1	chr7:4300717-4309514	0	0.0200129	inf	1	no	0.0288634	0	#NAME?	1	no	0.0257903	0	#NAME?	1	no	0	0.0202921	inf	1	no	#VALUE!	#NAME?	#NAME?	#VALUE!	no	no	no	no
ENSDARG00000091599	ENSDARG00000091599	CABZ01079494.1	chr25:1040334-1052977	0	0.022842	inf	1	no	0	0	0	1	no	0	0	0	1	no	0	0.0231607	inf	1	no	#VALUE!	0	0	#VALUE!	no	no	no	no
ENSDARG00000035367	ENSDARG00000035367	CABZ01080075.1	chr11:45262733-45263381	0	0.0163576	inf	1	no	0.0819006	0	#NAME?	1	no	0.0731806	0	#NAME?	1	no	0	0.016725	inf	1	no	#VALUE!	#NAME?	#NAME?	#VALUE!	no	no	no	no
ENSDARG00000087934	ENSDARG00000087934	CABZ01080435.1	chr16:58132552-58137826	0	0.00968265	inf	1	no	0.01212	0	#NAME?	1	no	0.0108295	0	#NAME?	1	no	0	0.00990008	inf	1	no	#VALUE!	#NAME?	#NAME?	#VALUE!	no	no	no	no
ENSDARG00000090121	ENSDARG00000090121	CABZ01083267.1	Zv9_NA201:3555-12121	0	0.191144	inf	1	no	0	0.337383	inf	1	no	0	0	0	1	no	0.248318	0.194245	-0.354309	1	no	#VALUE!	#VALUE!	0	0.354309	no	no	no	no
ENSDARG00000086673	ENSDARG00000086673	CABZ01084505.1	chr1:59777307-59777994	0.0116837	0	#NAME?	1	no	0.0934457	0.0856718	-0.125308	1	no	0.0834996	0.014677	-2.50821	1	no	0.0631852	0	#NAME?	1	no	#NAME?	0.125308	2.50821	#NAME?	no	no	no	no
ENSDARG00000078275	ENSDARG00000078275	CABZ01084703.1	chr13:10929-17112	0.0479975	0	#NAME?	1	no	0.280087	0	#NAME?	1	no	0.250275	0.0611247	-2.03369	1	no	0	0	0	1	no	#NAME?	#NAME?	2.03369	0	no	no	no	no
ENSDARG00000090631	ENSDARG00000090631	CABZ01088100.1	chr12:48998180-49024161	0.00259175	0	#NAME?	1	no	0.0151575	0.0224048	0.563778	1	no	0.013544	0.00330059	-2.03686	1	no	0.0165165	0	#NAME?	1	no	#NAME?	-0.563778	2.03686	#NAME?	no	no	no	no
ENSDARG00000074942	ENSDARG00000074942	CABZ01088691.1	chr2:7155343-7158267	0	0.0303729	inf	1	no	0.0344418	0	#NAME?	1	no	0.0307748	0	#NAME?	1	no	0	0.0309744	inf	1	no	#VALUE!	#NAME?	#NAME?	#VALUE!	no	no	no	no
ENSDARG00000087877	ENSDARG00000087877	CABZ01090124.1	chr17:3804971-3810208	0.123382	0	#NAME?	1	no	0.185647	0.249988	0.429301	1	no	0.165888	0.15517	-0.0963635	1	no	0.183994	0	#NAME?	1	no	#NAME?	-0.429301	0.0963635	#NAME?	no	no	no	no
ENSDARG00000088563	ENSDARG00000088563	CABZ01090226.1	chr5:1327415-1327748	0.0432963	0	#NAME?	1	no	0.0697468	0.0930943	0.416566	1	no	0.0623208	0.0543886	-0.196409	1	no	0.0685185	0	#NAME?	1	no	#NAME?	-0.416566	0.196409	#NAME?	no	no	no	no
ENSDARG00000088685	ENSDARG00000088685	CABZ01093082.1	chr5:19037278-19039765	0	0.0113922	inf	1	no	0	0.00904694	inf	1	no	0	0	0	1	no	0.00665866	0.0116322	0.804823	1	no	#VALUE!	#VALUE!	0	-0.804823	no	no	no	no
ENSDARG00000090093	ENSDARG00000090093	CABZ01104063.1	chr10:1025196-1026042	0	0.0124865	inf	1	no	0	0	0	1	no	0	0	0	1	no	0	0.0127337	inf	1	no	#VALUE!	0	0	#VALUE!	no	no	no	no
ENSDARG00000089215	ENSDARG00000089215	CABZ01109737.1	chr15:47148892-47153663	0.00390929	0	#NAME?	1	no	0.011024	0	#NAME?	1	no	0.00985117	0.0049215	-1.0012	1	no	0	0	0	1	no	#NAME?	#NAME?	1.0012	0	no	no	no	no
ENSDARG00000090189	ENSDARG00000090189	CABZ01112647.1	chr12:50570539-50571935	0.0114677	0	#NAME?	1	no	0.0330023	0	#NAME?	1	no	0.0294899	0.0145196	-1.02222	1	no	0	0	0	1	no	#NAME?	#NAME?	1.02222	0	no	no	no	no
ENSDARG00000089672	ENSDARG00000089672	CABZ01114082.1	chr5:146904-177780	0	0.0384183	inf	1	no	0.0961778	0.0773526	-0.314254	1	no	0.0859377	0	#NAME?	1	no	0.0570982	0.039281	-0.539612	1	no	#VALUE!	0.314254	#NAME?	0.539612	no	no	no	no
ENSDARG00000088529	ENSDARG00000088529	CABZ01114193.1	Zv9_NA358:0-2927	0.0101648	0	#NAME?	1	no	0.00767156	0.0125607	0.711329	1	no	0.0068554	0.012861	0.90769	1	no	0.00927175	0	#NAME?	1	no	#NAME?	-0.711329	-0.90769	#NAME?	no	no	no	no
ENSDARG00000090424	ENSDARG00000090424	camk2n2	chr24:25964945-25965724	0	0.766224	inf	1	no	0.695495	1.08543	0.642156	1	no	0.621488	0	#NAME?	1	no	0.800712	0.777824	-0.0418397	1	no	#VALUE!	-0.642156	#NAME?	0.0418397	no	no	no	no
ENSDARG00000069748	ENSDARG00000069748	capn5b	chr21:21110614-21166605	0	0.00779955	inf	1	no	0.0260414	0.00840724	-1.6311	1	no	0.0232692	0	#NAME?	1	no	0.00620584	0.00794388	0.356219	1	no	#VALUE!	1.6311	#NAME?	-0.356219	no	no	no	no
ENSDARG00000092933	ENSDARG00000092933	cbx8a	chr3:18285031-18473426	0	0.00526603	inf	1	no	0.352243	0.653136	0.89081	1	no	0.314758	0	#NAME?	1	no	0.481178	0.00536377	-6.48718	1	no	#VALUE!	-0.89081	#NAME?	6.48718	no	no	no	no
ENSDARG00000089062	ENSDARG00000089062	CCNB1 (2 of 2)	chr18:49491893-49496986	0.0253003	0	#NAME?	1	no	0.0150535	0.0122144	-0.301519	1	no	0.0134514	0.0318254	1.24242	1	no	0.00901611	0	#NAME?	1	no	#NAME?	0.301519	-1.24242	#NAME?	no	no	no	no
ENSDARG00000034098	ENSDARG00000034098	CD22	chr1:58093920-58105044	0	0.00609702	inf	1	no	0.0227612	0.0101865	-1.15992	1	no	0.0203384	0	#NAME?	1	no	0.00749736	0.00623394	-0.266239	1	no	#VALUE!	1.15992	#NAME?	0.266239	no	no	no	no
ENSDARG00000089255	ENSDARG00000089255	CD59 (2 of 2)	chr25:7943070-7946677	0.031744	0	#NAME?	1	no	0	0	0	1	no	0	0.040426	inf	1	no	0	0	0	1	no	#NAME?	0	#VALUE!	0	no	no	no	no
ENSDARG00000058393	ENSDARG00000058393	chrna4	chr11:13210239-13232200	0	0.00352488	inf	1	no	0	0.0117782	inf	1	no	0	0	0	1	no	0.00866891	0.00360403	-1.26624	1	no	#VALUE!	#VALUE!	0	1.26624	no	no	no	no
ENSDARG00000070724	ENSDARG00000070724	chrna4	chr11:13040191-13056332	0.00300299	0	#NAME?	1	no	0.00874252	0.0200736	1.19918	1	no	0.00781206	0.0038243	-1.03051	1	no	0.0148048	0	#NAME?	1	no	#NAME?	-1.19918	1.03051	#NAME?	no	no	no	no
ENSDARG00000087071	ENSDARG00000087071	CHRNA4 (3 of 3)	chr6:58411060-58424415	0.00814849	0	#NAME?	1	no	0	0.00835528	inf	1	no	0	0.0103098	inf	1	no	0.00614958	0	#NAME?	1	no	#NAME?	#VALUE!	#VALUE!	#NAME?	no	no	no	no
ENSDARG00000058880	ENSDARG00000058880	cldnj	chr15:2623499-2624132	0	0.0463163	inf	1	no	0.274742	0	#NAME?	1	no	0.245493	0	#NAME?	1	no	0	0.0471065	inf	1	no	#VALUE!	#NAME?	#NAME?	#VALUE!	no	no	no	no
ENSDARG00000093228	ENSDARG00000093228	CMKLR1 (2 of 3)	chr5:22382985-22383865	0.00915665	0	#NAME?	1	no	0.066762	0.0179483	-1.89518	1	no	0.059656	0.011661	-2.35498	1	no	0.0132101	0	#NAME?	1	no	#NAME?	1.89518	2.35498	#NAME?	no	no	no	no
ENSDARG00000087082	ENSDARG00000087082	CNGB3 (1 of 2)	chr24:31096604-31115684	0.00659172	0	#NAME?	1	no	0.190006	0.12211	-0.637858	1	no	0.169781	0.00828054	-4.35781	1	no	0.0899843	0	#NAME?	1	no	#NAME?	0.637858	4.35781	#NAME?	no	no	no	no
ENSDARG00000037337	ENSDARG00000037337	cnrip1b	chr13:961842-968918	0.00695766	0	#NAME?	1	no	0.0112082	0	#NAME?	1	no	0.0100149	0.00874018	-0.196409	1	no	0	0	0	1	no	#NAME?	#NAME?	0.196409	0	no	no	no	no
ENSDARG00000031483	ENSDARG00000031483	col9a1	chr13:39679468-39719819	0	0.0457633	inf	1	no	0.576265	0.00933134	-5.9485	1	no	0.514943	0	#NAME?	1	no	0.00686878	0.0466181	2.76276	1	no	#VALUE!	5.9485	#NAME?	-2.76276	no	no	no	no
ENSDARG00000053877	ENSDARG00000053877	cpdb	chr21:38032260-38061196	0.00163904	0	#NAME?	1	no	0.00861287	0	#NAME?	1	no	0.00769621	0.00208731	-1.8825	1	no	0	0	0	1	no	#NAME?	#NAME?	1.8825	0	no	no	no	no
ENSDARG00000045932	ENSDARG00000045932	cpeb1a	chr25:6232221-6249720	0.00415947	0	#NAME?	1	no	0.006001	0	#NAME?	1	no	0.00536257	0.00529708	-0.0177271	1	no	0	0	0	1	no	#NAME?	#NAME?	0.0177271	0	no	no	no	no
ENSDARG00000091510	ENSDARG00000091510	cplx3a	chr25:21214308-21217241	0	0.0181667	inf	1	no	0.0514805	0.112087	1.12253	1	no	0.0460036	0	#NAME?	1	no	0.082588	0.0184202	-2.16465	1	no	#VALUE!	-1.12253	#NAME?	2.16465	no	no	no	no
ENSDARG00000061466	ENSDARG00000061466	CPNE5 (2 of 2)	chr8:24769589-24929787	0.015895	0	#NAME?	1	no	0.0122103	0.00981903	-0.314448	1	no	0.0109102	0.0201131	0.882457	1	no	0.0072464	0	#NAME?	1	no	#NAME?	0.314448	-0.882457	#NAME?	no	no	no	no
ENSDARG00000075669	ENSDARG00000075669	CR318599.1	chr7:5011113-5015200	0	0.00823335	inf	1	no	0.0118587	0.0194169	0.711365	1	no	0.0105971	0	#NAME?	1	no	0.0143324	0.00841823	-0.767693	1	no	#VALUE!	-0.711365	#NAME?	0.767693	no	no	no	no
ENSDARG00000082399	ENSDARG00000082399	CR354430.1	chr25:2133274-2133368	8.87091	0	#NAME?	1	no	0	0	0	1	no	0	11.2239	inf	1	no	0	0	0	1	no	#NAME?	0	#VALUE!	0	no	no	no	no
ENSDARG00000091205	ENSDARG00000091205	CR354435.5	chr7:76856717-76857104	0.0992317	0	#NAME?	1	no	0.34583	0	#NAME?	1	no	0.309017	0.125334	-1.30191	1	no	0	0	0	1	no	#NAME?	#NAME?	1.30191	0	no	no	no	no
ENSDARG00000094141	ENSDARG00000094141	CR361547.1	chr4:32865019-33007129	0.0120344	0	#NAME?	1	no	0.0495286	0.0469182	-0.078116	1	no	0.0442578	0.0151913	-1.54269	1	no	0.034597	0	#NAME?	1	no	#NAME?	0.078116	1.54269	#NAME?	no	no	no	no
ENSDARG00000090594	ENSDARG00000090594	CR361561.2	Zv9_scaffold3531:108027-192224	0.0519156	0	#NAME?	1	no	0.0783632	0.0532331	-0.557851	1	no	0.0700263	0.065686	-0.09231	1	no	0.0391802	0	#NAME?	1	no	#NAME?	0.557851	0.09231	#NAME?	no	no	no	no
ENSDARG00000078583	ENSDARG00000078583	CR376825.1	chr14:16988625-16992583	0.00467045	0	#NAME?	1	no	0	0	0	1	no	0	0.00587975	inf	1	no	0	0	0	1	no	#NAME?	0	#VALUE!	0	no	no	no	no
ENSDARG00000079364	ENSDARG00000079364	CR377211.1	chr2:16308193-16309072	0.00917022	0	#NAME?	1	no	0	0.0396367	inf	1	no	0	0.0116783	inf	1	no	0.0292195	0	#NAME?	1	no	#NAME?	#VALUE!	#VALUE!	#NAME?	no	no	no	no
ENSDARG00000093254	ENSDARG00000093254	CR382294.1	chr4:34856682-34857936	0	0.0214657	inf	1	no	0.128329	0.13895	0.114719	1	no	0.114673	0	#NAME?	1	no	0.102418	0.0219275	-2.22366	1	no	#VALUE!	-0.114719	#NAME?	2.22366	no	no	no	no
ENSDARG00000032993	ENSDARG00000032993	CR383669.1	chr24:28278324-28279771	0.0250878	0	#NAME?	1	no	0.0404143	0	#NAME?	1	no	0.0361114	0.0315151	-0.196409	1	no	0	0	0	1	no	#NAME?	#NAME?	0.196409	0	no	no	no	no
ENSDARG00000076607	ENSDARG00000076607	CR383676.3	Zv9_scaffold3489:6268-6772	0.0188136	0	#NAME?	1	no	0.15047	0	#NAME?	1	no	0.134455	0.0236336	-2.50821	1	no	0	0	0	1	no	#NAME?	#NAME?	2.50821	0	no	no	no	no
ENSDARG00000005846	ENSDARG00000005846	CR384078.1	chr6:3625018-3627974	0.00921117	0	#NAME?	1	no	0	0	0	1	no	0	0.0117304	inf	1	no	0	0	0	1	no	#NAME?	0	#VALUE!	0	no	no	no	no
ENSDARG00000068742	ENSDARG00000068742	CR384085.1	chr5:17464461-17465853	0.00594574	0	#NAME?	1	no	0.0085781	0	#NAME?	1	no	0.00766549	0.00757188	-0.0177271	1	no	0	0	0	1	no	#NAME?	#NAME?	0.0177271	0	no	no	no	no
ENSDARG00000087115	ENSDARG00000087115	CR385046.2	chr7:5618193-5619261	0.0110934	0	#NAME?	1	no	0	0	0	1	no	0	0.0141274	inf	1	no	0	0	0	1	no	#NAME?	0	#VALUE!	0	no	no	no	no
ENSDARG00000091549	ENSDARG00000091549	CR385046.3	chr7:5630803-5632085	0.0110341	0	#NAME?	1	no	0	0	0	1	no	0	0.0140519	inf	1	no	0	0	0	1	no	#NAME?	0	#VALUE!	0	no	no	no	no
ENSDARG00000088490	ENSDARG00000088490	CR385078.2	chr20:47396004-47494572	0.0625058	0	#NAME?	1	no	0.159945	0.10783	-0.568811	1	no	0.142919	0.0791768	-0.852053	1	no	0.0795952	0	#NAME?	1	no	#NAME?	0.568811	0.852053	#NAME?	no	no	no	no
ENSDARG00000086496	ENSDARG00000086496	CR388047.3	Zv9_scaffold3458:186344-191799	0	0.00431452	inf	1	no	0.12838	0.15193	0.242991	1	no	0.114717	0	#NAME?	1	no	0.112102	0.00441141	-4.66742	1	no	#VALUE!	-0.242991	#NAME?	4.66742	no	no	no	no
ENSDARG00000088623	ENSDARG00000088623	CR388079.2	chr22:28216564-28217309	0.0221352	0	#NAME?	1	no	0	0	0	1	no	0	0.0278062	inf	1	no	0	0	0	1	no	#NAME?	0	#VALUE!	0	no	no	no	no
ENSDARG00000090874	ENSDARG00000090874	CR388152.1	chr7:7161385-7169236	0.0221621	0	#NAME?	1	no	0.0790319	0.0152613	-2.37256	1	no	0.070622	0.0278617	-1.34183	1	no	0.0112325	0	#NAME?	1	no	#NAME?	2.37256	1.34183	#NAME?	no	no	no	no
ENSDARG00000040701	ENSDARG00000040701	CR388160.1	chr15:36118840-36123802	0.0224995	0	#NAME?	1	no	0.068089	0.0302938	-1.1684	1	no	0.0608395	0.0285312	-1.09247	1	no	0.0222966	0	#NAME?	1	no	#NAME?	1.1684	1.09247	#NAME?	no	no	no	no
ENSDARG00000088176	ENSDARG00000088176	CR388416.4	chr4:35799948-35800911	0	0.00956782	inf	1	no	0	0	0	1	no	0	0	0	1	no	0	0.00978267	inf	1	no	#VALUE!	0	0	#VALUE!	no	no	no	no
ENSDARG00000088637	ENSDARG00000088637	CR391924.1	chr5:25493128-25494109	0.0233797	0	#NAME?	1	no	0.0580824	0	#NAME?	1	no	0.0519003	0.0295295	-0.813584	1	no	0	0	0	1	no	#NAME?	#NAME?	0.813584	0	no	no	no	no
ENSDARG00000014975	ENSDARG00000014975	CR391937.1	chr16:28079384-28080600	0	0.0168057	inf	1	no	0.0213375	0.0314012	0.557425	1	no	0.0190657	0	#NAME?	1	no	0.0231484	0.0170953	-0.437316	1	no	#VALUE!	-0.557425	#NAME?	0.437316	no	no	no	no
ENSDARG00000052056	ENSDARG00000052056	CR391963.2	chr25:19405072-19410512	0	0.0172205	inf	1	no	0.0121998	0.0331499	1.44215	1	no	0.0109019	0	#NAME?	1	no	0.0243987	0.0174608	-0.482688	1	no	#VALUE!	-1.44215	#NAME?	0.482688	no	no	no	no
ENSDARG00000089454	ENSDARG00000089454	CR392364.1	chr17:25134651-25237123	0	0.00650682	inf	1	no	0	0	0	1	no	0	0	0	1	no	0	0.00665293	inf	1	no	#VALUE!	0	0	#VALUE!	no	no	no	no
ENSDARG00000074395	ENSDARG00000074395	CR407557.1	chr6:28007908-28404466	0.0212189	0	#NAME?	1	no	0.0149591	0	#NAME?	1	no	0.0133676	0.026713	0.998803	1	no	0	0	0	1	no	#NAME?	#NAME?	-0.998803	0	no	no	no	no
ENSDARG00000055334	ENSDARG00000055334	CR450686.1	chr22:8634967-8765640	0.0142664	0	#NAME?	1	no	0.102016	0.0875933	-0.219902	1	no	0.0911559	0.0179604	-2.34352	1	no	0.0645403	0	#NAME?	1	no	#NAME?	0.219902	2.34352	#NAME?	no	no	no	no
ENSDARG00000038392	ENSDARG00000038392	CR450729.1	chr3:2361260-2425811	0	0.00422416	inf	1	no	0.0211499	0.0155625	-0.442575	1	no	0.018898	0	#NAME?	1	no	0.0114724	0.00431902	-1.40939	1	no	#VALUE!	0.442575	#NAME?	1.40939	no	no	no	no
ENSDARG00000088994	ENSDARG00000088994	CR450780.3	Zv9_scaffold3514:39074-49726	0	0.00598517	inf	1	no	0.00863205	0	#NAME?	1	no	0.00771299	0	#NAME?	1	no	0	0.00606868	inf	1	no	#VALUE!	#NAME?	#NAME?	#VALUE!	no	no	no	no
ENSDARG00000070506	ENSDARG00000070506	CR450842.1	chr3:2337586-2340738	0.0109352	0	#NAME?	1	no	0.0522294	0	#NAME?	1	no	0.0466714	0.013737	-1.76447	1	no	0	0	0	1	no	#NAME?	#NAME?	1.76447	0	no	no	no	no
ENSDARG00000086404	ENSDARG00000086404	CR524823.2	chr16:56301684-56304912	0.0221868	0	#NAME?	1	no	0.0648783	0	#NAME?	1	no	0.057972	0.0282549	-1.03686	1	no	0	0	0	1	no	#NAME?	#NAME?	1.03686	0	no	no	no	no
ENSDARG00000086534	ENSDARG00000086534	CR533575.1	chr16:19152034-19162767	0.115059	0	#NAME?	1	no	0	0	0	1	no	0	0.145847	inf	1	no	0	0	0	1	no	#NAME?	0	#VALUE!	0	no	no	no	no
ENSDARG00000088329	ENSDARG00000088329	CR556710.1	chr13:11292918-11293770	0.0280348	0	#NAME?	1	no	0.0137815	0	#NAME?	1	no	0.0123153	0.0354092	1.52367	1	no	0	0	0	1	no	#NAME?	#NAME?	-1.52367	0	no	no	no	no
ENSDARG00000055011	ENSDARG00000055011	CR558302.1	chr11:3625244-3635128	0.0642793	0	#NAME?	1	no	0.0778002	0.0718365	-0.115057	1	no	0.0695219	0.0812093	0.224176	1	no	0.0529813	0	#NAME?	1	no	#NAME?	0.115057	-0.224176	#NAME?	no	no	no	no
ENSDARG00000015974	ENSDARG00000015974	CR626884.1	chr15:3925591-3929550	0.0159967	0	#NAME?	1	no	0	0.0377874	inf	1	no	0	0.0203717	inf	1	no	0.0278929	0	#NAME?	1	no	#NAME?	#VALUE!	#VALUE!	#NAME?	no	no	no	no
ENSDARG00000053062	ENSDARG00000053062	CR628323.3	chr17:6121993-6148052	0.0137311	0	#NAME?	1	no	0	0	0	1	no	0	0.0172489	inf	1	no	0	0	0	1	no	#NAME?	0	#VALUE!	0	no	no	no	no
ENSDARG00000070997	ENSDARG00000070997	CR749177.1	chr19:8517621-8546473	0	0.0161955	inf	1	no	0.0364074	0	#NAME?	1	no	0.0325326	0	#NAME?	1	no	0	0.0165162	inf	1	no	#VALUE!	#NAME?	#NAME?	#VALUE!	no	no	no	no
ENSDARG00000053015	ENSDARG00000053015	CR749741.1	chr12:46486115-46496936	0.0109351	0	#NAME?	1	no	0	0	0	1	no	0	0.0137365	inf	1	no	0	0	0	1	no	#NAME?	0	#VALUE!	0	no	no	no	no
ENSDARG00000087951	ENSDARG00000087951	CR749741.3	chr12:46368055-46374884	0.0388274	0	#NAME?	1	no	0	0	0	1	no	0	0.049209	inf	1	no	0	0	0	1	no	#NAME?	0	#VALUE!	0	no	no	no	no
ENSDARG00000088052	ENSDARG00000088052	CR759791.3	chr22:27098714-27110848	0	0.0153269	inf	1	no	0.0203613	0.0274181	0.429301	1	no	0.0181942	0	#NAME?	1	no	0.02018	0.0156105	-0.370408	1	no	#VALUE!	-0.429301	#NAME?	0.370408	no	no	no	no
ENSDARG00000086652	ENSDARG00000086652	CR759843.1	chr4:38205597-38250216	0	1.61106e-05	inf	1	no	0.0630161	2.56554e-05	-11.2622	1	no	0.056312	0	#NAME?	1	no	2.4837e-05	1.73418e-05	-0.518239	1	no	#VALUE!	11.2622	#NAME?	0.518239	no	no	no	no
ENSDARG00000052319	ENSDARG00000052319	CR759882.1	chr6:15815824-15818773	0	0.0166737	inf	1	no	0.0478837	0.0320973	-0.577081	1	no	0.0427865	0	#NAME?	1	no	0.023624	0.0169064	-0.482688	1	no	#VALUE!	0.577081	#NAME?	0.482688	no	no	no	no
ENSDARG00000086492	ENSDARG00000086492	CR759907.1	chr4:33673749-33699630	0.00653893	0	#NAME?	1	no	0.0686271	0.137401	1.00155	1	no	0.0613259	0.00821281	-2.90055	1	no	0.101283	0	#NAME?	1	no	#NAME?	-1.00155	2.90055	#NAME?	no	no	no	no
ENSDARG00000062723	ENSDARG00000062723	CR762408.1	chr11:13120438-13140111	0.00413116	0	#NAME?	1	no	0	0	0	1	no	0	0.00520083	inf	1	no	0	0	0	1	no	#NAME?	0	#VALUE!	0	no	no	no	no
ENSDARG00000079514	ENSDARG00000079514	CR762475.1	chr4:44246202-44248437	0.00652547	0	#NAME?	1	no	0.00936535	0.0150645	0.685746	1	no	0.00836822	0.00821508	-0.0266461	1	no	0.0111199	0	#NAME?	1	no	#NAME?	-0.685746	0.0266461	#NAME?	no	no	no	no
ENSDARG00000074973	ENSDARG00000074973	CR788254.1	chr2:30061435-30062203	0.0214976	0	#NAME?	1	no	0.0170111	0	#NAME?	1	no	0.0152013	0.0270052	0.82904	1	no	0	0	0	1	no	#NAME?	#NAME?	-0.82904	0	no	no	no	no
ENSDARG00000038111	ENSDARG00000038111	CR788316.1	chr4:58282597-58294494	0	0.00479622	inf	1	no	1.53147	0.313206	-2.28974	1	no	1.36853	0	#NAME?	1	no	0.231095	0.00486314	-5.57045	1	no	#VALUE!	2.28974	#NAME?	5.57045	no	no	no	no
ENSDARG00000090329	ENSDARG00000090329	CR790369.2	chr1:55978216-55994560	0	0.0148684	inf	1	no	0	0	0	1	no	0	0	0	1	no	0	0.0151245	inf	1	no	#VALUE!	0	0	#VALUE!	no	no	no	no
ENSDARG00000090970	ENSDARG00000090970	CR812464.1	chr3:46989548-47038021	0.0668041	0	#NAME?	1	no	0.0504181	0.0684994	0.442149	1	no	0.0450543	0.0845236	0.90769	1	no	0.0504164	0	#NAME?	1	no	#NAME?	-0.442149	-0.90769	#NAME?	no	no	no	no
ENSDARG00000091562	ENSDARG00000091562	CR812468.2	chr11:22540228-22540321	4.99761	0	#NAME?	1	no	0	0	0	1	no	0	6.29162	inf	1	no	0	0	0	1	no	#NAME?	0	#VALUE!	0	no	no	no	no
ENSDARG00000076211	ENSDARG00000076211	CR846080.3	chr3:10211462-10212240	0.0113317	0	#NAME?	1	no	0	0	0	1	no	0	0.0142348	inf	1	no	0	0	0	1	no	#NAME?	0	#VALUE!	0	no	no	no	no
ENSDARG00000079154	ENSDARG00000079154	CR846080.4	chr3:10198754-10201436	0.00931179	0	#NAME?	1	no	0.118686	0.0241288	-2.29832	1	no	0.106055	0.0116974	-3.18056	1	no	0.0178108	0	#NAME?	1	no	#NAME?	2.29832	3.18056	#NAME?	no	no	no	no
ENSDARG00000090501	ENSDARG00000090501	CR846080.5	chr3:10193160-10193877	0.0795727	0	#NAME?	1	no	0.0380208	0.03085	-0.301519	1	no	0.0339742	0.100557	1.5655	1	no	0.022772	0	#NAME?	1	no	#NAME?	0.301519	-1.5655	#NAME?	no	no	no	no
ENSDARG00000089224	ENSDARG00000089224	CR847504.1	chr4:49218160-49227533	0	0.0175408	inf	1	no	0.0217632	0.0616173	1.50145	1	no	0.0194469	0	#NAME?	1	no	0.0453889	0.0179347	-1.33959	1	no	#VALUE!	-1.50145	#NAME?	1.33959	no	no	no	no
ENSDARG00000044353	ENSDARG00000044353	CR847523.1	chr21:39174414-39185190	0.00473329	0	#NAME?	1	no	0	0.00906723	inf	1	no	0	0.00595886	inf	1	no	0.00667359	0	#NAME?	1	no	#NAME?	#VALUE!	#VALUE!	#NAME?	no	no	no	no
ENSDARG00000057090	ENSDARG00000057090	CR847844.2	chr10:23808555-23810367	0	0.0143913	inf	1	no	0.0407818	0.0333863	-0.288671	1	no	0.0364431	0	#NAME?	1	no	0.0246442	0.0145921	-0.756061	1	no	#VALUE!	0.288671	#NAME?	0.756061	no	no	no	no
ENSDARG00000088522	ENSDARG00000088522	CR847851.5	chr14:2446346-2448707	0	0.00663758	inf	1	no	0.0124931	0.0168728	0.433571	1	no	0.0111636	0	#NAME?	1	no	0.0124186	0.00675194	-0.879126	1	no	#VALUE!	-0.433571	#NAME?	0.879126	no	no	no	no
ENSDARG00000077100	ENSDARG00000077100	CR847895.2	chr4:28611144-28844703	0	0.0371159	inf	1	no	0	0	0	1	no	0	0	0	1	no	0	0.0378509	inf	1	no	#VALUE!	0	0	#VALUE!	no	no	no	no
ENSDARG00000079673	ENSDARG00000079673	CR847950.3	chr7:18271386-18271804	0.0395106	0	#NAME?	1	no	0.125059	0	#NAME?	1	no	0.111754	0.049633	-1.17096	1	no	0	0	0	1	no	#NAME?	#NAME?	1.17096	0	no	no	no	no
ENSDARG00000088401	ENSDARG00000088401	CR848731.1	chr16:1805292-1806432	0	0.0386194	inf	1	no	0.321352	0.154976	-1.05211	1	no	0.287147	0	#NAME?	1	no	0.114299	0.0392461	-1.54219	1	no	#VALUE!	1.05211	#NAME?	1.54219	no	no	no	no
ENSDARG00000029993	ENSDARG00000029993	CR848836.2	chr15:36471350-36472280	0	0.0210443	inf	1	no	0.0125207	0	#NAME?	1	no	0.0111876	0	#NAME?	1	no	0	0.0214876	inf	1	no	#VALUE!	#NAME?	#NAME?	#VALUE!	no	no	no	no
ENSDARG00000053931	ENSDARG00000053931	CR848836.5	chr15:36449523-36450647	0.00849083	0	#NAME?	1	no	0.0494383	0	#NAME?	1	no	0.0441766	0.0108131	-2.03051	1	no	0	0	0	1	no	#NAME?	#NAME?	2.03051	0	no	no	no	no
ENSDARG00000089008	ENSDARG00000089008	CR854846.1	chr11:16522260-16524688	0	0.0223558	inf	1	no	0	0	0	1	no	0	0	0	1	no	0	0.0226678	inf	1	no	#VALUE!	0	0	#VALUE!	no	no	no	no
ENSDARG00000077886	ENSDARG00000077886	CR854948.1	chr4:41664482-41668678	0.0245563	0	#NAME?	1	no	0.0346237	0.0470407	0.442149	1	no	0.0309402	0.0309145	-0.00119725	1	no	0.0346225	0	#NAME?	1	no	#NAME?	-0.442149	0.00119725	#NAME?	no	no	no	no
ENSDARG00000082128	ENSDARG00000082128	CR855265.1	Zv9_scaffold3550:127222-127310	0	7.51735	inf	1	no	0	0	0	1	no	0	0	0	1	no	0	7.68616	inf	1	no	#VALUE!	0	0	#VALUE!	no	no	no	no
ENSDARG00000087589	ENSDARG00000087589	CR855327.1	chr1:50899798-50945330	0	0.00870728	inf	1	no	0	0	0	1	no	0	0	0	1	no	0	0.00890281	inf	1	no	#VALUE!	0	0	#VALUE!	no	no	no	no
ENSDARG00000052874	ENSDARG00000052874	CR933791.1	chr3:3316972-3318242	0.0110341	0	#NAME?	1	no	0	0	0	1	no	0	0.0140519	inf	1	no	0	0	0	1	no	#NAME?	0	#VALUE!	0	no	no	no	no
ENSDARG00000067592	ENSDARG00000067592	CR936371.1	chr4:55522196-55523222	0	0.00801861	inf	1	no	0.0115648	0	#NAME?	1	no	0.0103335	0	#NAME?	1	no	0	0.00813049	inf	1	no	#VALUE!	#NAME?	#NAME?	#VALUE!	no	no	no	no
ENSDARG00000074950	ENSDARG00000074950	CR936967.1	chr15:21264365-21265835	0.016928	0	#NAME?	1	no	0.0127758	0	#NAME?	1	no	0.0114166	0.0214181	0.90769	1	no	0	0	0	1	no	#NAME?	#NAME?	-0.90769	0	no	no	no	no
ENSDARG00000088714	ENSDARG00000088714	CR936977.2	chr8:5868707-5869613	0.00803817	0	#NAME?	1	no	0.0515677	0.0345668	-0.577081	1	no	0.0460783	0.0100975	-2.19009	1	no	0.0254415	0	#NAME?	1	no	#NAME?	0.577081	2.19009	#NAME?	no	no	no	no
ENSDARG00000093401	ENSDARG00000093401	crha	chr2:42213620-42215154	0.0116116	0	#NAME?	1	no	0.0183765	0	#NAME?	1	no	0.0164215	0.0145864	-0.17096	1	no	0	0	0	1	no	#NAME?	#NAME?	0.17096	0	no	no	no	no
ENSDARG00000027657	ENSDARG00000027657	crhb	chr24:25455630-25489944	0.00776131	0	#NAME?	1	no	0.0543802	0	#NAME?	1	no	0.0485912	0.0097498	-2.31725	1	no	0	0	0	1	no	#NAME?	#NAME?	2.31725	0	no	no	no	no
ENSDARG00000053875	ENSDARG00000053875	cryba1b	chr21:38020623-38029549	0	0.0530903	inf	1	no	0	0	0	1	no	0	0	0	1	no	0	0.053831	inf	1	no	#VALUE!	0	0	#VALUE!	no	no	no	no
ENSDARG00000087324	ENSDARG00000087324	crygm2d1	chr9:23371922-23372927	0.0139104	0	#NAME?	1	no	0	0	0	1	no	0	0.017715	inf	1	no	0	0	0	1	no	#NAME?	0	#VALUE!	0	no	no	no	no
ENSDARG00000069827	ENSDARG00000069827	crygm2d11	chr9:23131919-23132881	0	0.0126307	inf	1	no	0	0	0	1	no	0	0	0	1	no	0	0.012807	inf	1	no	#VALUE!	0	0	#VALUE!	no	no	no	no
ENSDARG00000069801	ENSDARG00000069801	crygm2d12	chr9:23238021-23239027	0	0.0204972	inf	1	no	0	0	0	1	no	0	0	0	1	no	0	0.0207832	inf	1	no	#VALUE!	0	0	#VALUE!	no	no	no	no
ENSDARG00000087301	ENSDARG00000087301	crygm2d14	chr9:23179885-23180912	0.0119503	0	#NAME?	1	no	0	0	0	1	no	0	0.0152186	inf	1	no	0	0	0	1	no	#NAME?	0	#VALUE!	0	no	no	no	no
ENSDARG00000069826	ENSDARG00000069826	crygm2d15	chr9:23149944-23150775	0	0.0173339	inf	1	no	0	0	0	1	no	0	0	0	1	no	0	0.0177231	inf	1	no	#VALUE!	0	0	#VALUE!	no	no	no	no
ENSDARG00000088823	ENSDARG00000088823	crygm2d3	chr9:23313815-23315199	0	0.0372233	inf	1	no	0.0178949	0	#NAME?	1	no	0.0159896	0	#NAME?	1	no	0	0.0377427	inf	1	no	#VALUE!	#NAME?	#NAME?	#VALUE!	no	no	no	no
ENSDARG00000073750	ENSDARG00000073750	crygm2d9	chr9:23272357-23273397	0	0.026289	inf	1	no	0	0	0	1	no	0	0	0	1	no	0	0.0267754	inf	1	no	#VALUE!	0	0	#VALUE!	no	no	no	no
ENSDARG00000044875	ENSDARG00000044875	crygm2e	chr9:23113466-23114334	0	0.0282662	inf	1	no	0.0203833	0	#NAME?	1	no	0.0182131	0	#NAME?	1	no	0	0.0286606	inf	1	no	#VALUE!	#NAME?	#NAME?	#VALUE!	no	no	no	no
ENSDARG00000008219	ENSDARG00000008219	crygm4	chr6:25786-26795	0.0321133	0	#NAME?	1	no	0	0.0650658	inf	1	no	0	0.0403869	inf	1	no	0.0478892	0	#NAME?	1	no	#NAME?	#VALUE!	#VALUE!	#NAME?	no	no	no	no
ENSDARG00000041179	ENSDARG00000041179	crygm5	chr9:23377939-23399587	0.01461	0	#NAME?	1	no	0	0	0	1	no	0	0.018393	inf	1	no	0	0	0	1	no	#NAME?	0	#VALUE!	0	no	no	no	no
ENSDARG00000053862	ENSDARG00000053862	crygmx	chr12:32525267-32528780	0	0.0295621	inf	1	no	0	0.019725	inf	1	no	0	0	0	1	no	0.0145169	0.0299831	1.04641	1	no	#VALUE!	#VALUE!	0	-1.04641	no	no	no	no
ENSDARG00000074001	ENSDARG00000074001	crygmxl2	chr12:32529924-32533156	0	0.0127854	inf	1	no	0	0	0	1	no	0	0	0	1	no	0	0.0129638	inf	1	no	#VALUE!	0	0	#VALUE!	no	no	no	no
ENSDARG00000070395	ENSDARG00000070395	cs	chr23:34121569-34273511	0.0021305	0	#NAME?	1	no	0	0	0	1	no	0	0.00271319	inf	1	no	0	0	0	1	no	#NAME?	0	#VALUE!	0	no	no	no	no
ENSDARG00000094313	ENSDARG00000094313	CT027609.1	chr4:29931527-29952505	0.00347002	0	#NAME?	1	no	0.0831608	0.0478275	-0.798063	1	no	0.0743098	0.00435902	-4.09148	1	no	0.0352401	0	#NAME?	1	no	#NAME?	0.798063	4.09148	#NAME?	no	no	no	no
ENSDARG00000055567	ENSDARG00000055567	CT027762.3	chr7:4450694-4459576	0.00463685	0	#NAME?	1	no	0.015746	0.00284759	-2.46717	1	no	0.0140704	0.00584901	-1.2664	1	no	0.00210196	0	#NAME?	1	no	#NAME?	2.46717	1.2664	#NAME?	no	no	no	no
ENSDARG00000014095	ENSDARG00000014095	CT027835.1	chr14:42241156-42567308	0.00691502	0	#NAME?	1	no	0	0	0	1	no	0	0.00868661	inf	1	no	0	0	0	1	no	#NAME?	0	#VALUE!	0	no	no	no	no
ENSDARG00000007053	ENSDARG00000007053	CT030719.1	chr25:12742834-12744874	0.0160022	0	#NAME?	1	no	0	0	0	1	no	0	0.0201999	inf	1	no	0	0	0	1	no	#NAME?	0	#VALUE!	0	no	no	no	no
ENSDARG00000088314	ENSDARG00000088314	CT476804.3	chr24:26376371-26384338	0	0.0450367	inf	1	no	0	0	0	1	no	0	0	0	1	no	0	0.0460481	inf	1	no	#VALUE!	0	0	#VALUE!	no	no	no	no
ENSDARG00000090846	ENSDARG00000090846	CT573236.2	chr11:11984036-11984812	0	0.0173526	inf	1	no	0	0	0	1	no	0	0	0	1	no	0	0.0176962	inf	1	no	#VALUE!	0	0	#VALUE!	no	no	no	no
ENSDARG00000087724	ENSDARG00000087724	CT573264.5	chr14:2733671-2735978	0.00569429	0	#NAME?	1	no	0.00856791	0	#NAME?	1	no	0.00765603	0.00716136	-0.0963635	1	no	0	0	0	1	no	#NAME?	#NAME?	0.0963635	0	no	no	no	no
ENSDARG00000084167	ENSDARG00000084167	CT573382.2	chr24:5996276-5998307	0.000667577	0	#NAME?	1	no	0	0	0	1	no	0	0.000664768	inf	1	no	0	0	0	1	no	#NAME?	0	#VALUE!	0	no	no	no	no
ENSDARG00000093788	ENSDARG00000093788	CT583625.2	chr22:6536961-6781445	0.0182034	0	#NAME?	1	no	0	0	0	1	no	0	0.0229167	inf	1	no	0	0	0	1	no	#NAME?	0	#VALUE!	0	no	no	no	no
ENSDARG00000088122	ENSDARG00000088122	CT583709.2	chr7:67095494-67097025	0.00567496	0	#NAME?	1	no	1.313	2.08223	0.665263	1	no	1.17323	0.00714435	-7.35947	1	no	1.53549	0	#NAME?	1	no	#NAME?	-0.665263	7.35947	#NAME?	no	no	no	no
ENSDARG00000057519	ENSDARG00000057519	CT737184.1	chr10:21869751-22032148	0.00464373	0	#NAME?	1	no	0.00748067	0	#NAME?	1	no	0.0066842	0.00583342	-0.196414	1	no	0	0	0	1	no	#NAME?	#NAME?	0.196414	0	no	no	no	no
ENSDARG00000071695	ENSDARG00000071695	CT956093.2	chr14:22040012-22043078	0.00912964	0	#NAME?	1	no	0	0	0	1	no	0	0.0116266	inf	1	no	0	0	0	1	no	#NAME?	0	#VALUE!	0	no	no	no	no
ENSDARG00000057328	ENSDARG00000057328	cth1	chr7:19193860-19196954	0.00933617	0	#NAME?	1	no	0.0408865	0.0199051	-1.03849	1	no	0.0365344	0.0118896	-1.61956	1	no	0.0146737	0	#NAME?	1	no	#NAME?	1.03849	1.61956	#NAME?	no	no	no	no
ENSDARG00000089750	ENSDARG00000089750	ctsl1b	chr12:17758535-18018803	0.00520522	0	#NAME?	1	no	0	0	0	1	no	0	0.00653876	inf	1	no	0	0	0	1	no	#NAME?	0	#VALUE!	0	no	no	no	no
ENSDARG00000090332	ENSDARG00000090332	CTXN1	chr2:56644027-56644297	0.0835237	0	#NAME?	1	no	0	0	0	1	no	0	0.106367	inf	1	no	0	0	0	1	no	#NAME?	0	#VALUE!	0	no	no	no	no
ENSDARG00000095517	ENSDARG00000095517	CU041364.1	chr4:38257879-38259007	0.013553	0	#NAME?	1	no	0.0390035	0.0737317	0.918681	1	no	0.0348524	0.0171599	-1.02222	1	no	0.0543691	0	#NAME?	1	no	#NAME?	-0.918681	1.02222	#NAME?	no	no	no	no
ENSDARG00000073787	ENSDARG00000073787	CU075911.1	chr11:1512499-1515976	0.0152802	0	#NAME?	1	no	0.0156281	0.0105222	-0.570699	1	no	0.0139648	0.0192099	0.460057	1	no	0.00774448	0	#NAME?	1	no	#NAME?	0.570699	-0.460057	#NAME?	no	no	no	no
ENSDARG00000091394	ENSDARG00000091394	CU182823.2	Zv9_scaffold3493:10184-14280	0	0.0102638	inf	1	no	0	0	0	1	no	0	0	0	1	no	0	0.0104671	inf	1	no	#VALUE!	0	0	#VALUE!	no	no	no	no
ENSDARG00000019591	ENSDARG00000019591	CU207301.1	chr25:38269130-38269698	0	0.0250185	inf	1	no	0	0	0	1	no	0	0	0	1	no	0	0.0253676	inf	1	no	#VALUE!	0	0	#VALUE!	no	no	no	no
ENSDARG00000061083	ENSDARG00000061083	CU207301.3	chr25:38271131-38298042	0.104462	0	#NAME?	1	no	0	0.0532331	inf	1	no	0	0.131771	inf	1	no	0.0391802	0	#NAME?	1	no	#NAME?	#VALUE!	#VALUE!	#NAME?	no	no	no	no
ENSDARG00000079843	ENSDARG00000079843	CU207301.8	chr25:38271131-38298042	0	0.0587394	inf	1	no	0.0386727	0.0525417	0.442149	1	no	0.0345584	0	#NAME?	1	no	0.0386713	0.059743	0.627506	1	no	#VALUE!	-0.442149	#NAME?	-0.627506	no	no	no	no
ENSDARG00000081157	ENSDARG00000081157	CU280887.1	chr1:56764158-56770684	0	4.90614	inf	0.2478	no	0	0	0	1	no	0	0	0	1	no	0	4.99074	inf	0.1875	no	#VALUE!	0	0	#VALUE!	no	no	no	no
ENSDARG00000026900	ENSDARG00000026900	CU302316.1	chr21:44326512-44372933	0	0.0979917	inf	1	no	0.120502	0	#NAME?	1	no	0.107682	0	#NAME?	1	no	0	0.100192	inf	1	no	#VALUE!	#NAME?	#NAME?	#VALUE!	no	no	no	no
ENSDARG00000082168	ENSDARG00000082168	CU442763.1	chr21:38102083-38102169	0	26.2244	inf	1	no	10.3899	73.4756	2.82208	1	no	9.28456	0	#NAME?	1	no	54.1153	26.7886	-1.01442	1	no	#VALUE!	-2.82208	#NAME?	1.01442	no	no	no	no
ENSDARG00000091953	ENSDARG00000091953	CU457794.1	chr4:35160993-35161866	0.00946743	0	#NAME?	1	no	0	0	0	1	no	0	0.0119188	inf	1	no	0	0	0	1	no	#NAME?	0	#VALUE!	0	no	no	no	no
ENSDARG00000086552	ENSDARG00000086552	CU457819.2	chr7:7228571-7229349	0.0555777	0	#NAME?	1	no	0.118246	0	#NAME?	1	no	0.105663	0.0699682	-0.594693	1	no	0	0	0	1	no	#NAME?	#NAME?	0.594693	0	no	no	no	no
ENSDARG00000086495	ENSDARG00000086495	CU459095.1	chr11:14673139-14882992	0	0.00196447	inf	1	no	0	0	0	1	no	0	0	0	1	no	0	0.00200337	inf	1	no	#VALUE!	0	0	#VALUE!	no	no	no	no
ENSDARG00000075090	ENSDARG00000075090	CU467646.1	chr4:61125586-61150493	0	0.00123507	inf	1	no	0	0.00206347	inf	1	no	0	0	0	1	no	0.00151873	0.0012628	-0.266239	1	no	#VALUE!	#VALUE!	0	0.266239	no	no	no	no
ENSDARG00000076970	ENSDARG00000076970	CU467824.1	chr2:47745989-47756677	0.01618	0	#NAME?	1	no	0.034613	0.0156754	-1.14281	1	no	0.0309306	0.0204859	-0.594401	1	no	0.0115373	0	#NAME?	1	no	#NAME?	1.14281	0.594401	#NAME?	no	no	no	no
ENSDARG00000077035	ENSDARG00000077035	CU467982.1	chr17:10680080-10682995	0	0.035783	inf	1	no	0	0.0410983	inf	1	no	0	0	0	1	no	0.0302969	0.0365212	0.269563	1	no	#VALUE!	#VALUE!	0	-0.269563	no	no	no	no
ENSDARG00000086475	ENSDARG00000086475	CU468684.1	Zv9_scaffold3486:63829-149205	0.00780466	0	#NAME?	1	no	0.0125726	0.0167813	0.416566	1	no	0.011234	0.00980416	-0.196409	1	no	0.0123512	0	#NAME?	1	no	#NAME?	-0.416566	0.196409	#NAME?	no	no	no	no
ENSDARG00000086223	ENSDARG00000086223	CU469509.1	chr15:576647-589759	0	0.082336	inf	1	no	0.118748	1.01602	3.09695	1	no	0.106105	0	#NAME?	1	no	0.748618	0.0834848	-3.16465	1	no	#VALUE!	-3.09695	#NAME?	3.16465	no	no	no	no
ENSDARG00000081342	ENSDARG00000081342	CU550700.1	chr6:59628375-59628462	32.4581	0	#NAME?	1	no	0	13.3064	inf	1	no	0	40.8116	inf	1	no	9.79366	0	#NAME?	1	no	#NAME?	#VALUE!	#VALUE!	#NAME?	no	no	no	no
ENSDARG00000081645	ENSDARG00000081645	CU550700.2	chr6:59627902-59627976	17.09	0	#NAME?	1	no	0	0	0	1	no	0	21.515	inf	1	no	0	0	0	1	no	#NAME?	0	#VALUE!	0	no	no	no	no
ENSDARG00000088141	ENSDARG00000088141	CU570684.5	chr3:59710301-59713508	0.139387	0	#NAME?	1	no	0	0.0930943	inf	1	no	0	0.176052	inf	1	no	0.0685185	0	#NAME?	1	no	#NAME?	#VALUE!	#VALUE!	#NAME?	no	no	no	no
ENSDARG00000059138	ENSDARG00000059138	CU570800.2	chr13:305966-306950	0	0.0173905	inf	1	no	0	0.0187454	inf	1	no	0	0	0	1	no	0.013837	0.0177123	0.356219	1	no	#VALUE!	#VALUE!	0	-0.356219	no	no	no	no
ENSDARG00000092732	ENSDARG00000092732	CU570881.1	chr22:4461005-4463734	0	0.010611	inf	1	no	0	0	0	1	no	0	0	0	1	no	0	0.0107591	inf	1	no	#VALUE!	0	0	#VALUE!	no	no	no	no
ENSDARG00000075091	ENSDARG00000075091	CU571064.1	chr25:13534525-13535883	0	0.0104008	inf	1	no	0	0	0	1	no	0	0	0	1	no	0	0.010546	inf	1	no	#VALUE!	0	0	#VALUE!	no	no	no	no
ENSDARG00000088920	ENSDARG00000088920	CU571257.2	chr22:7888638-7899652	0.0128966	0	#NAME?	1	no	0	0	0	1	no	0	0.0164237	inf	1	no	0	0	0	1	no	#NAME?	0	#VALUE!	0	no	no	no	no
ENSDARG00000069839	ENSDARG00000069839	CU571382.1	chr3:59540285-59544176	0	0.0474361	inf	1	no	0.0355455	0.0288415	-0.301519	1	no	0.0317624	0	#NAME?	1	no	0.0212895	0.0483755	1.18414	1	no	#VALUE!	0.301519	#NAME?	-1.18414	no	no	no	no
ENSDARG00000091281	ENSDARG00000091281	CU571382.2	chr3:59548097-59551371	0.0354037	0	#NAME?	1	no	0	0	0	1	no	0	0.044474	inf	1	no	0	0	0	1	no	#NAME?	0	#VALUE!	0	no	no	no	no
ENSDARG00000094966	ENSDARG00000094966	CU571382.3	chr3:59523311-59523605	0	0.101446	inf	1	no	0.113014	0.185039	0.711329	1	no	0.100991	0	#NAME?	1	no	0.136587	0.103455	-0.400825	1	no	#VALUE!	-0.711329	#NAME?	0.400825	no	no	no	no
ENSDARG00000077796	ENSDARG00000077796	CU571384.2	chr2:36070266-36070808	0.0254809	0	#NAME?	1	no	0	0	0	1	no	0	0.0324498	inf	1	no	0	0	0	1	no	#NAME?	0	#VALUE!	0	no	no	no	no
ENSDARG00000089780	ENSDARG00000089780	CU571402.1	chr17:18641131-18700550	0.00739509	0	#NAME?	1	no	0.0320074	0.0144953	-1.14281	1	no	0.0286022	0.00941762	-1.60269	1	no	0.0106687	0	#NAME?	1	no	#NAME?	1.14281	1.60269	#NAME?	no	no	no	no
ENSDARG00000087008	ENSDARG00000087008	CU638740.4	chr14:4382290-4389202	0	0.0647074	inf	1	no	0.0805968	0.0262049	-1.62089	1	no	0.0720196	0	#NAME?	1	no	0.0193432	0.0660263	1.77121	1	no	#VALUE!	1.62089	#NAME?	-1.77121	no	no	no	no
ENSDARG00000088954	ENSDARG00000088954	CU655961.4	chr15:42826407-42827388	0.0196395	0	#NAME?	1	no	0	0	0	1	no	0	0.0247247	inf	1	no	0	0	0	1	no	#NAME?	0	#VALUE!	0	no	no	no	no
ENSDARG00000068018	ENSDARG00000068018	CU672228.1	chr7:18423795-18424232	0.0365256	0	#NAME?	1	no	0.0588396	0	#NAME?	1	no	0.0525749	0.0458832	-0.196409	1	no	0	0	0	1	no	#NAME?	#NAME?	0.196409	0	no	no	no	no
ENSDARG00000086168	ENSDARG00000086168	CU672228.4	chr7:18403477-18403951	0	0.0703804	inf	1	no	0	0	0	1	no	0	0	0	1	no	0	0.0713624	inf	1	no	#VALUE!	0	0	#VALUE!	no	no	no	no
ENSDARG00000053952	ENSDARG00000053952	CU681841.1	chr23:46015427-46016160	0.0227072	0	#NAME?	1	no	0	0	0	1	no	0	0.0285866	inf	1	no	0	0	0	1	no	#NAME?	0	#VALUE!	0	no	no	no	no
ENSDARG00000091299	ENSDARG00000091299	CU681855.1	chr7:65374932-65396157	0	0.0250185	inf	1	no	0	0	0	1	no	0	0	0	1	no	0	0.0253676	inf	1	no	#VALUE!	0	0	#VALUE!	no	no	no	no
ENSDARG00000086809	ENSDARG00000086809	CU693480.1	Zv9_scaffold3544:43460-51621	0.0459549	0	#NAME?	1	no	0.0353034	0.0567867	0.685746	1	no	0.0315446	0.0581442	0.882241	1	no	0.0419174	0	#NAME?	1	no	#NAME?	-0.685746	-0.882241	#NAME?	no	no	no	no
ENSDARG00000079988	ENSDARG00000079988	CU694222.2	chr2:54130892-54144217	0.00571683	0	#NAME?	1	no	0.0184187	0	#NAME?	1	no	0.0164576	0.00718146	-1.19641	1	no	0	0	0	1	no	#NAME?	#NAME?	1.19641	0	no	no	no	no
ENSDARG00000090824	ENSDARG00000090824	CU694442.1	chr4:27743127-27743829	0.0629446	0	#NAME?	1	no	0.0234918	0	#NAME?	1	no	0.0209906	0.0796689	1.92427	1	no	0	0	0	1	no	#NAME?	#NAME?	-1.92427	0	no	no	no	no
ENSDARG00000095745	ENSDARG00000095745	CU694951.3	chr17:50535318-50536612	0.0087602	0	#NAME?	1	no	0	0	0	1	no	0	0.0110284	inf	1	no	0	0	0	1	no	#NAME?	0	#VALUE!	0	no	no	no	no
ENSDARG00000038624	ENSDARG00000038624	CU896602.1	chr24:39717818-39718254	0	0.0512396	inf	1	no	0	0	0	1	no	0	0	0	1	no	0	0.0522543	inf	1	no	#VALUE!	0	0	#VALUE!	no	no	no	no
ENSDARG00000074999	ENSDARG00000074999	CU896602.3	chr24:39712859-39713332	0	0.0402873	inf	1	no	0	0	0	1	no	0	0	0	1	no	0	0.0408494	inf	1	no	#VALUE!	0	0	#VALUE!	no	no	no	no
ENSDARG00000010684	ENSDARG00000010684	CU915772.1	chr14:2862623-2865038	0	0.0069093	inf	1	no	0.00403856	0	#NAME?	1	no	0.00360891	0	#NAME?	1	no	0	0.00705484	inf	1	no	#VALUE!	#NAME?	#NAME?	#VALUE!	no	no	no	no
ENSDARG00000089607	ENSDARG00000089607	CU929037.1	chr17:50092804-50094125	0.00780466	0	#NAME?	1	no	0.0125726	0	#NAME?	1	no	0.011234	0.00980416	-0.196409	1	no	0	0	0	1	no	#NAME?	#NAME?	0.196409	0	no	no	no	no
ENSDARG00000087392	ENSDARG00000087392	CU929143.1	chr23:44683247-44693551	0.00199911	0	#NAME?	1	no	0.0104612	0.00446587	-1.22803	1	no	0.0093481	0.00251415	-1.8946	1	no	0.00329216	0	#NAME?	1	no	#NAME?	1.22803	1.8946	#NAME?	no	no	no	no
ENSDARG00000088025	ENSDARG00000088025	CU929159.1	chr6:20273856-20284482	0.00746392	0	#NAME?	1	no	0.0118124	0	#NAME?	1	no	0.0105557	0.00937614	-0.17096	1	no	0	0	0	1	no	#NAME?	#NAME?	0.17096	0	no	no	no	no
ENSDARG00000086867	ENSDARG00000086867	CU929449.2	chr7:3202281-3214161	0.0501201	0	#NAME?	1	no	0	0	0	1	no	0	0.0637481	inf	1	no	0	0	0	1	no	#NAME?	0	#VALUE!	0	no	no	no	no
ENSDARG00000087361	ENSDARG00000087361	CU984580.1	chr2:58192922-58201113	0.0348347	0	#NAME?	1	no	0.202799	0.270153	0.413726	1	no	0.181221	0.0437592	-2.05009	1	no	0.199094	0	#NAME?	1	no	#NAME?	-0.413726	2.05009	#NAME?	no	no	no	no
ENSDARG00000058064	ENSDARG00000058064	cx31.7	chr14:12574818-12591935	0	0.0255984	inf	1	no	0.0143112	0.042876	1.58303	1	no	0.0127887	0	#NAME?	1	no	0.0316073	0.0261021	-0.276094	1	no	#VALUE!	-1.58303	#NAME?	0.276094	no	no	no	no
ENSDARG00000041348	ENSDARG00000041348	cyp19a1a	chr18:38057823-38073637	0.0219114	0	#NAME?	1	no	0	0.008818	inf	1	no	0	0.027675	inf	1	no	0.00650904	0	#NAME?	1	no	#NAME?	#VALUE!	#VALUE!	#NAME?	no	no	no	no
ENSDARG00000040433	ENSDARG00000040433	cyp2k22	chr3:8814256-8831106	0	0.0120288	inf	1	no	0.0224634	0.00773218	-1.53863	1	no	0.0200722	0	#NAME?	1	no	0.00569098	0.0121967	1.09974	1	no	#VALUE!	1.53863	#NAME?	-1.09974	no	no	no	no
ENSDARG00000068283	ENSDARG00000068283	cyp2x10.2	chr7:53548371-53551578	0	0.0111652	inf	1	no	0	0	0	1	no	0	0	0	1	no	0	0.0114003	inf	1	no	#VALUE!	0	0	#VALUE!	no	no	no	no
ENSDARG00000036471	ENSDARG00000036471	dand5	chr1:52320997-52323243	0	0.00666204	inf	1	no	0.0163849	0	#NAME?	1	no	0.0146417	0	#NAME?	1	no	0	0.00681164	inf	1	no	#VALUE!	#NAME?	#NAME?	#VALUE!	no	no	no	no
ENSDARG00000086393	ENSDARG00000086393	dbx1a	chr7:17799841-17803249	0	0.00515313	inf	1	no	0.00730143	0.0338293	2.21202	1	no	0.00652465	0	#NAME?	1	no	0.02495	0.00522503	-2.25553	1	no	#VALUE!	-2.21202	#NAME?	2.25553	no	no	no	no
ENSDARG00000090081	ENSDARG00000090081	DCHS1	chr15:30798338-30805603	0.00715759	0	#NAME?	1	no	0.0273963	0.00884467	-1.6311	1	no	0.0244799	0.00905611	-1.43463	1	no	0.00652873	0	#NAME?	1	no	#NAME?	1.6311	1.43463	#NAME?	no	no	no	no
ENSDARG00000054334	ENSDARG00000054334	DCTPP1	chr1:23377311-23415647	0.661865	0	#NAME?	1	no	1.81972	0.134186	-3.7614	1	no	1.62622	0.83617	-0.959656	1	no	0.0995824	0	#NAME?	1	no	#NAME?	3.7614	0.959656	#NAME?	no	no	no	no
ENSDARG00000040955	ENSDARG00000040955	dharma	chr15:28360390-28361587	0	0.0112755	inf	1	no	0	0	0	1	no	0	0	0	1	no	0	0.0114328	inf	1	no	#VALUE!	0	0	#VALUE!	no	no	no	no
ENSDARG00000092002	ENSDARG00000092002	DHPS (2 of 2)	chr3:13277159-13285359	0.0105085	0	#NAME?	1	no	0.53546	1.1454	1.097	1	no	0.478478	0.0132008	-5.17976	1	no	0.844075	0	#NAME?	1	no	#NAME?	-1.097	5.17976	#NAME?	no	no	no	no
ENSDARG00000009372	ENSDARG00000009372	diras1b	chr2:36780136-36781749	0.0254878	0	#NAME?	1	no	0.149524	0	#NAME?	1	no	0.133614	0.0320544	-2.05947	1	no	0	0	0	1	no	#NAME?	#NAME?	2.05947	0	no	no	no	no
ENSDARG00000012203	ENSDARG00000012203	dlg3	chr14:33925623-33984936	0	0.00406849	inf	1	no	0	0	0	1	no	0	0	0	1	no	0	0.00412525	inf	1	no	#VALUE!	0	0	#VALUE!	no	no	no	no
ENSDARG00000014280	ENSDARG00000014280	dlgap1a	chr2:29324945-29407657	0.00452993	0	#NAME?	1	no	0.0161391	0.027813	0.785196	1	no	0.0144213	0.00570285	-1.33845	1	no	0.0204931	0	#NAME?	1	no	#NAME?	-0.785196	1.33845	#NAME?	no	no	no	no
ENSDARG00000002510	ENSDARG00000002510	dmbx1b	chr6:3371264-3381103	0.00516574	0	#NAME?	1	no	0.0145671	0	#NAME?	1	no	0.0130174	0.00650328	-1.0012	1	no	0	0	0	1	no	#NAME?	#NAME?	1.0012	0	no	no	no	no
ENSDARG00000038540	ENSDARG00000038540	dntt	chr13:51622353-51633972	0	0.0726802	inf	1	no	0.182066	0.499762	1.45678	1	no	0.162689	0	#NAME?	1	no	0.368464	0.0740602	-2.31475	1	no	#VALUE!	-1.45678	#NAME?	2.31475	no	no	no	no
ENSDARG00000014858	ENSDARG00000014858	drd2l	chr16:57790202-57818030	0.00563958	0	#NAME?	1	no	0.287825	0.25097	-0.197679	1	no	0.257197	0.00709982	-5.17895	1	no	0.184884	0	#NAME?	1	no	#NAME?	0.197679	5.17895	#NAME?	no	no	no	no
ENSDARG00000083025	ENSDARG00000083025	dre-mir-145	chr14:40133369-40133482	0	2.37874	inf	1	no	0	0	0	1	no	0	0	0	1	no	0	2.43215	inf	1	no	#VALUE!	0	0	#VALUE!	no	no	no	no
ENSDARG00000080888	ENSDARG00000080888	dre-mir-1788	chr9:11824464-11827936	3.02968	0	#NAME?	1	no	0	0	0	1	no	0	3.80587	inf	1	no	0	0	0	1	no	#NAME?	0	#VALUE!	0	no	no	no	no
ENSDARG00000083886	ENSDARG00000083886	dre-mir-2196	chr12:33597330-33682941	2.16518	0	#NAME?	1	no	0	5.11458	inf	1	no	0	2.75735	inf	1	no	3.77535	0	#NAME?	1	no	#NAME?	#VALUE!	#VALUE!	#NAME?	no	no	no	no
ENSDARG00000080051	ENSDARG00000080051	dre-mir-459	chr1:1275347-1275428	0	11.604	inf	1	no	0	0	0	1	no	0	0	0	1	no	0	11.8646	inf	1	no	#VALUE!	0	0	#VALUE!	no	no	no	no
ENSDARG00000078004	ENSDARG00000078004	drl	chr5:64707774-64714873	0.0136122	0	#NAME?	1	no	0.021639	0.0146342	-0.56429	1	no	0.0193364	0.0170995	-0.177364	1	no	0.0107709	0	#NAME?	1	no	#NAME?	0.56429	0.177364	#NAME?	no	no	no	no
ENSDARG00000061498	ENSDARG00000061498	DUSP13 (1 of 3)	chr13:25066746-25074756	0.0314427	0	#NAME?	1	no	0.00975092	0	#NAME?	1	no	0.00871263	0.0397286	2.189	1	no	0	0	0	1	no	#NAME?	#NAME?	-2.189	0	no	no	no	no
ENSDARG00000094665	ENSDARG00000094665	DUSP13 (2 of 3)	chr13:25077467-25078063	0	0.0359573	inf	1	no	0	0	0	1	no	0	0	0	1	no	0	0.0367647	inf	1	no	#VALUE!	0	0	#VALUE!	no	no	no	no
ENSDARG00000091469	ENSDARG00000091469	ECM1 (1 of 2)	chr19:11893595-11896364	0.019469	0	#NAME?	1	no	0.057182	0	#NAME?	1	no	0.0510938	0.0247937	-1.04318	1	no	0	0	0	1	no	#NAME?	#NAME?	1.04318	0	no	no	no	no
ENSDARG00000070925	ENSDARG00000070925	EDN3 (1 of 2)	chr11:373395-381474	0	0.209947	inf	1	no	0.238073	0	#NAME?	1	no	0.212725	0	#NAME?	1	no	0	0.214105	inf	1	no	#VALUE!	#NAME?	#NAME?	#VALUE!	no	no	no	no
ENSDARG00000003783	ENSDARG00000003783	efnb2b	chr1:6774235-6799314	0.00704454	0	#NAME?	1	no	0.0224969	0	#NAME?	1	no	0.0201025	0.00884931	-1.18374	1	no	0	0	0	1	no	#NAME?	#NAME?	1.18374	0	no	no	no	no
ENSDARG00000059416	ENSDARG00000059416	EGFLAM	chr5:8343244-8381097	0.00550578	0	#NAME?	1	no	0.0249263	0.0122996	-1.01906	1	no	0.022273	0.00692428	-1.68556	1	no	0.00906701	0	#NAME?	1	no	#NAME?	1.01906	1.68556	#NAME?	no	no	no	no
ENSDARG00000044795	ENSDARG00000044795	entpd2b	chr21:9933469-9942873	0	0.0253375	inf	1	no	0.0690788	0.0557565	-0.309103	1	no	0.0617249	0	#NAME?	1	no	0.0411559	0.0257265	-0.677843	1	no	#VALUE!	0.309103	#NAME?	0.677843	no	no	no	no
ENSDARG00000094616	ENSDARG00000094616	EVA1A (5 of 6)	chr9:8432651-8435262	0.0101764	0	#NAME?	1	no	0	0	0	1	no	0	0.0129608	inf	1	no	0	0	0	1	no	#NAME?	0	#VALUE!	0	no	no	no	no
ENSDARG00000092057	ENSDARG00000092057	EVA1C (3 of 3)	chr9:8407224-8416569	0.0088093	0	#NAME?	1	no	0.0278832	2.41366e-07	-16.8178	1	no	0.0249168	0.0110662	-1.17096	1	no	1.77648e-07	0	#NAME?	1	no	#NAME?	16.8178	1.17096	#NAME?	no	no	no	no
ENSDARG00000020814	ENSDARG00000020814	faimb	chr6:16317850-16324012	0	0.033933	inf	1	no	0.0140416	0	#NAME?	1	no	0.0125477	0	#NAME?	1	no	0	0.0345773	inf	1	no	#VALUE!	#NAME?	#NAME?	#VALUE!	no	no	no	no
ENSDARG00000074011	ENSDARG00000074011	FAM196A (2 of 3)	chr17:32018911-32019994	0.00641934	0	#NAME?	1	no	0.0101593	0	#NAME?	1	no	0.00907844	0.00806394	-0.17096	1	no	0	0	0	1	no	#NAME?	#NAME?	0.17096	0	no	no	no	no
ENSDARG00000068884	ENSDARG00000068884	FBXO16 (1 of 2)	Zv9_scaffold3564:130268-137112	0.00422487	0	#NAME?	1	no	0	0	0	1	no	0	0.0053188	inf	1	no	0	0	0	1	no	#NAME?	0	#VALUE!	0	no	no	no	no
ENSDARG00000068850	ENSDARG00000068850	fhit	chr6:54037074-54037527	0	0.029174	inf	1	no	0	0	0	1	no	0	0	0	1	no	0	0.0298291	inf	1	no	#VALUE!	0	0	#VALUE!	no	no	no	no
ENSDARG00000030133	ENSDARG00000030133	fkbp6	chr5:57393453-57398957	0	0.023647	inf	1	no	0.00698107	0.0112293	0.685746	1	no	0.00623779	0	#NAME?	1	no	0.00828894	0.0240957	1.53952	1	no	#VALUE!	-0.685746	#NAME?	-1.53952	no	no	no	no
ENSDARG00000021201	ENSDARG00000021201	flh	chr13:14837120-14839117	0	0.00922736	inf	1	no	0.0802414	0.0648279	-0.307733	1	no	0.0717009	0	#NAME?	1	no	0.0477539	0.00943457	-2.33959	1	no	#VALUE!	0.307733	#NAME?	2.33959	no	no	no	no
ENSDARG00000092469	ENSDARG00000092469	FNDC7 (1 of 7)	chr2:45675288-45682103	0.0838003	0	#NAME?	1	no	0.438798	0.0506064	-3.11616	1	no	0.392086	0.106381	-1.88192	1	no	0.0373553	0	#NAME?	1	no	#NAME?	3.11616	1.88192	#NAME?	no	no	no	no
ENSDARG00000071394	ENSDARG00000071394	foxq2	chr22:20747511-20749720	0.0156931	0	#NAME?	1	no	0	0	0	1	no	0	0.0198556	inf	1	no	0	0	0	1	no	#NAME?	0	#VALUE!	0	no	no	no	no
ENSDARG00000087509	ENSDARG00000087509	FP015862.1	chr16:24012178-24014588	0.00843474	0	#NAME?	1	no	0.0133488	0	#NAME?	1	no	0.0119287	0.0105957	-0.17096	1	no	0	0	0	1	no	#NAME?	#NAME?	0.17096	0	no	no	no	no
ENSDARG00000091643	ENSDARG00000091643	FP085412.2	chr4:61896661-61901871	0	0.00763949	inf	1	no	0	0	0	1	no	0	0	0	1	no	0	0.00774608	inf	1	no	#VALUE!	0	0	#VALUE!	no	no	no	no
ENSDARG00000089270	ENSDARG00000089270	FP102168.1	chr21:16749821-16755972	0.0079364	0	#NAME?	1	no	0.0251203	0	#NAME?	1	no	0.0224478	0.00996966	-1.17096	1	no	0	0	0	1	no	#NAME?	#NAME?	1.17096	0	no	no	no	no
ENSDARG00000010183	ENSDARG00000010183	FP102808.1	chr25:5314257-5327960	0.00304176	0	#NAME?	1	no	0.0042888	0	#NAME?	1	no	0.00383253	0.00382935	-0.00119725	1	no	0	0	0	1	no	#NAME?	#NAME?	0.00119725	0	no	no	no	no
ENSDARG00000068160	ENSDARG00000068160	FP245465.2	Zv9_scaffold3465:274939-280119	0.0390174	0	#NAME?	1	no	0.442077	0	#NAME?	1	no	0.395036	0.04912	-3.0076	1	no	0	0	0	1	no	#NAME?	#NAME?	3.0076	0	no	no	no	no
ENSDARG00000010841	ENSDARG00000010841	fshb	chr7:33940214-33946224	0.00804461	0	#NAME?	1	no	0.0113419	0	#NAME?	1	no	0.0101353	0.0101284	-0.000980268	1	no	0	0	0	1	no	#NAME?	#NAME?	0.000980268	0	no	no	no	no
ENSDARG00000018506	ENSDARG00000018506	ftr03	chr2:42348695-42351372	0.00988816	0	#NAME?	1	no	0.11931	0	#NAME?	1	no	0.106612	0.0125925	-3.08173	1	no	0	0	0	1	no	#NAME?	#NAME?	3.08173	0	no	no	no	no
ENSDARG00000069508	ENSDARG00000069508	ftr46	chr3:5174433-5176166	0.0385934	0	#NAME?	1	no	0.0652054	0.027695	-1.23537	1	no	0.058266	0.049053	-0.248313	1	no	0.0204163	0	#NAME?	1	no	#NAME?	1.23537	0.248313	#NAME?	no	no	no	no
ENSDARG00000016460	ENSDARG00000016460	FUT9 (1 of 16)	chr17:15480577-15481706	0.00684692	0	#NAME?	1	no	0	0.0158066	inf	1	no	0	0.00861976	inf	1	no	0.0116677	0	#NAME?	1	no	#NAME?	#VALUE!	#VALUE!	#NAME?	no	no	no	no
ENSDARG00000074707	ENSDARG00000074707	FUT9 (5 of 16)	chr8:3442636-3443746	0.00622801	0	#NAME?	1	no	0	0	0	1	no	0	0.00782359	inf	1	no	0	0	0	1	no	#NAME?	0	#VALUE!	0	no	no	no	no
ENSDARG00000058736	ENSDARG00000058736	gabra6b	chr21:40623672-40667527	0.0104614	0	#NAME?	1	no	0	0.0107269	inf	1	no	0	0.0132363	inf	1	no	0.00789514	0	#NAME?	1	no	#NAME?	#VALUE!	#VALUE!	#NAME?	no	no	no	no
ENSDARG00000044676	ENSDARG00000044676	GADD45G (3 of 3)	chr21:19537916-19539614	0.00439094	0	#NAME?	1	no	0.0140225	0	#NAME?	1	no	0.0125301	0.00551587	-1.18374	1	no	0	0	0	1	no	#NAME?	#NAME?	1.18374	0	no	no	no	no
ENSDARG00000073860	ENSDARG00000073860	GAS2L2	chr5:64839797-64850299	0.00972925	0	#NAME?	1	no	0	0.0186376	inf	1	no	0	0.0122484	inf	1	no	0.0137175	0	#NAME?	1	no	#NAME?	#VALUE!	#VALUE!	#NAME?	no	no	no	no
ENSDARG00000077550	ENSDARG00000077550	gcnt4b	chr21:14069589-14070859	0	0.00681205	inf	1	no	0.00852677	0	#NAME?	1	no	0.00761892	0	#NAME?	1	no	0	0.00696502	inf	1	no	#VALUE!	#NAME?	#NAME?	#VALUE!	no	no	no	no
ENSDARG00000095788	ENSDARG00000095788	ghrhrl	chr23:40407709-40425216	0.0205683	0	#NAME?	1	no	0.0875213	0	#NAME?	1	no	0.0782076	0.025894	-1.59469	1	no	0	0	0	1	no	#NAME?	#NAME?	1.59469	0	no	no	no	no
ENSDARG00000057117	ENSDARG00000057117	ghsrb	chr24:27538906-27542860	0.00708437	0	#NAME?	1	no	0.0201563	0.0434968	1.10968	1	no	0.018011	0.00891869	-1.01398	1	no	0.0320492	0	#NAME?	1	no	#NAME?	-1.10968	1.01398	#NAME?	no	no	no	no
ENSDARG00000010958	ENSDARG00000010958	glmnb	chr6:28681903-28694625	0.0184805	0	#NAME?	1	no	0.104768	0.0489235	-1.0986	1	no	0.0936173	0.0235348	-1.99198	1	no	0.0360459	0	#NAME?	1	no	#NAME?	1.0986	1.99198	#NAME?	no	no	no	no
ENSDARG00000006865	ENSDARG00000006865	glra4a	chr14:40499038-40570905	0.0192449	0	#NAME?	1	no	0.0791794	0.0682887	-0.213479	1	no	0.0707537	0.0242166	-1.54681	1	no	0.0503684	0	#NAME?	1	no	#NAME?	0.213479	1.54681	#NAME?	no	no	no	no
ENSDARG00000078276	ENSDARG00000078276	GLT25D1 (1 of 3)	chr1:58366146-58387672	0.00225953	0	#NAME?	1	no	0.14549	0.0846546	-0.781264	1	no	0.130006	0.00285886	-5.50699	1	no	0.0624683	0	#NAME?	1	no	#NAME?	0.781264	5.50699	#NAME?	no	no	no	no
ENSDARG00000044199	ENSDARG00000044199	gnat1	chr6:42850342-42861712	0	0.011268	inf	1	no	0.0359978	0	#NAME?	1	no	0.0321655	0	#NAME?	1	no	0	0.0114603	inf	1	no	#VALUE!	#NAME?	#NAME?	#VALUE!	no	no	no	no
ENSDARG00000010680	ENSDARG00000010680	gngt2a	chr3:23384002-23387382	0.0746178	0	#NAME?	1	no	0.0868603	0	#NAME?	1	no	0.0776156	0.0943196	0.281211	1	no	0	0	0	1	no	#NAME?	#NAME?	-0.281211	0	no	no	no	no
ENSDARG00000038116	ENSDARG00000038116	gnrhr4	chr18:25174865-25184697	0	0.0071403	inf	1	no	0.0177182	0.026306	0.57016	1	no	0.0158325	0	#NAME?	1	no	0.0193923	0.00730064	-1.40939	1	no	#VALUE!	-0.57016	#NAME?	1.40939	no	no	no	no
ENSDARG00000094229	ENSDARG00000094229	gpn2	chr16:36207344-36402983	0	0.00861432	inf	1	no	0	0.0143922	inf	1	no	0	0	0	1	no	0.0105928	0.00880776	-0.266236	1	no	#VALUE!	#VALUE!	0	0.266236	no	no	no	no
ENSDARG00000063156	ENSDARG00000063156	GPR139	chr3:10257962-10258931	0.0230314	0	#NAME?	1	no	0.0118823	0.0349729	1.55742	1	no	0.0106172	0.0289545	1.44739	1	no	0.0257814	0	#NAME?	1	no	#NAME?	-1.55742	-1.44739	#NAME?	no	no	no	no
ENSDARG00000076565	ENSDARG00000076565	GPR151	chr13:15129935-15132125	0	0.00640491	inf	1	no	0.0184748	0	#NAME?	1	no	0.0165078	0	#NAME?	1	no	0	0.00649428	inf	1	no	#VALUE!	#NAME?	#NAME?	#VALUE!	no	no	no	no
ENSDARG00000094860	ENSDARG00000094860	GPR3	chr19:45031399-45036187	0.0149361	0	#NAME?	1	no	0.0338819	0.0408058	0.268257	1	no	0.0302763	0.0188596	-0.682891	1	no	0.0300991	0	#NAME?	1	no	#NAME?	-0.268257	0.682891	#NAME?	no	no	no	no
ENSDARG00000006079	ENSDARG00000006079	gpr37l1a	chr22:656054-660229	0.0574972	0	#NAME?	1	no	0.08455	0.0626543	-0.432392	1	no	0.0755503	0.072788	-0.0537357	1	no	0.0461881	0	#NAME?	1	no	#NAME?	0.432392	0.0537357	#NAME?	no	no	no	no
ENSDARG00000063357	ENSDARG00000063357	GPR45	chr9:6664594-6665722	0	0.00785906	inf	1	no	0.0488409	0.047471	-0.0410408	1	no	0.0436423	0	#NAME?	1	no	0.0350409	0.00803554	-2.12457	1	no	#VALUE!	0.0410408	#NAME?	2.12457	no	no	no	no
ENSDARG00000077645	ENSDARG00000077645	GPR78 (1 of 2)	chr7:60214961-60218642	0	0.0355975	inf	1	no	0.0220833	0	#NAME?	1	no	0.0197329	0	#NAME?	1	no	0	0.0363969	inf	1	no	#VALUE!	#NAME?	#NAME?	#VALUE!	no	no	no	no
ENSDARG00000043122	ENSDARG00000043122	gpr88	chr22:16400530-16401409	0.0273928	0	#NAME?	1	no	0	0.0392661	inf	1	no	0	0.0344107	inf	1	no	0.0289003	0	#NAME?	1	no	#NAME?	#VALUE!	#VALUE!	#NAME?	no	no	no	no
ENSDARG00000089584	ENSDARG00000089584	GPR98 (2 of 2)	Zv9_NA651:5340-9278	0.113194	0	#NAME?	1	no	0	0	0	1	no	0	0.143318	inf	1	no	0	0	0	1	no	#NAME?	0	#VALUE!	0	no	no	no	no
ENSDARG00000086973	ENSDARG00000086973	GPRIN1	chr13:53360098-53361751	0	0.00501134	inf	1	no	0.0125456	0	#NAME?	1	no	0.0112098	0	#NAME?	1	no	0	0.00512387	inf	1	no	#VALUE!	#NAME?	#NAME?	#VALUE!	no	no	no	no
ENSDARG00000089149	ENSDARG00000089149	GPX2	chr17:49501768-49504913	0.0494076	0	#NAME?	1	no	0.147517	0.0246122	-2.58343	1	no	0.131811	0.0625351	-1.07573	1	no	0.0181149	0	#NAME?	1	no	#NAME?	2.58343	1.07573	#NAME?	no	no	no	no
ENSDARG00000074647	ENSDARG00000074647	GRIN3B (2 of 2)	chr11:14257598-14296829	0.0058196	0	#NAME?	1	no	0.00427317	0	#NAME?	1	no	0.0038182	0.00741125	0.956824	1	no	0	0	0	1	no	#NAME?	#NAME?	-0.956824	0	no	no	no	no
ENSDARG00000011184	ENSDARG00000011184	grk1b	chr5:63250684-63286407	0	0.00378707	inf	1	no	0.0342091	0.0126396	-1.43643	1	no	0.0305676	0	#NAME?	1	no	0.00931705	0.003862	-1.27052	1	no	#VALUE!	1.43643	#NAME?	1.27052	no	no	no	no
ENSDARG00000075227	ENSDARG00000075227	GRM5 (2 of 2)	chr15:42413270-42490698	0	0.0052157	inf	1	no	0.00656396	0.010652	0.698481	1	no	0.00586536	0	#NAME?	1	no	0.00786279	0.00530556	-0.567537	1	no	#VALUE!	-0.698481	#NAME?	0.567537	no	no	no	no
ENSDARG00000076491	ENSDARG00000076491	GSC2	chr5:1385394-1389016	0.0495071	0	#NAME?	1	no	0	0	0	1	no	0	0.0621905	inf	1	no	0	0	0	1	no	#NAME?	0	#VALUE!	0	no	no	no	no
ENSDARG00000030758	ENSDARG00000030758	guca1c	chr15:2849208-2949259	0.00387313	0	#NAME?	1	no	0.00568786	0	#NAME?	1	no	0.00508227	0.00493242	-0.0431759	1	no	0	0	0	1	no	#NAME?	#NAME?	0.0431759	0	no	no	no	no
ENSDARG00000005776	ENSDARG00000005776	guk1b	chr8:18750347-18758898	0.00566417	0	#NAME?	1	no	0.0363405	0	#NAME?	1	no	0.032472	0.00711552	-2.19016	1	no	0	0	0	1	no	#NAME?	#NAME?	2.19016	0	no	no	no	no
ENSDARG00000095816	ENSDARG00000095816	hadhb	chr20:48621120-48621490	0	3.46683	inf	1	no	0	0	0	1	no	0	0	0	1	no	0	3.53548	inf	1	no	#VALUE!	0	0	#VALUE!	no	no	no	no
ENSDARG00000079078	ENSDARG00000079078	hbaa1	chr3:55950129-55957631	0.46125	0	#NAME?	1	no	0	0	0	1	no	0	0.579436	inf	1	no	0	0	0	1	no	#NAME?	0	#VALUE!	0	no	no	no	no
ENSDARG00000019122	ENSDARG00000019122	he1b	chr22:14196008-14259407	0	0.0430822	inf	1	no	0.0383195	0.191589	2.32187	1	no	0.0342415	0	#NAME?	1	no	0.141335	0.0438425	-1.68872	1	no	#VALUE!	-2.32187	#NAME?	1.68872	no	no	no	no
ENSDARG00000022670	ENSDARG00000022670	he2	chr22:14196008-14259407	0.00753483	0	#NAME?	1	no	0.0302732	0.0395824	0.38682	1	no	0.0270525	0.0094858	-1.51192	1	no	0.0291331	0	#NAME?	1	no	#NAME?	-0.38682	1.51192	#NAME?	no	no	no	no
ENSDARG00000093993	ENSDARG00000093993	heatr5a	chr17:28683493-28729024	0.0375273	0	#NAME?	1	no	0	0	0	1	no	0	0.0471418	inf	1	no	0	0	0	1	no	#NAME?	0	#VALUE!	0	no	no	no	no
ENSDARG00000077945	ENSDARG00000077945	HEPACAM (2 of 2)	chr5:59868696-59879039	0.0126232	0	#NAME?	1	no	0.11077	0.0434968	-1.34859	1	no	0.0989813	0.0158572	-2.64201	1	no	0.0320492	0	#NAME?	1	no	#NAME?	1.34859	2.64201	#NAME?	no	no	no	no
ENSDARG00000074897	ENSDARG00000074897	hes2.1	chr8:49077471-49082398	0.0473142	0	#NAME?	1	no	0	0	0	1	no	0	0.0597599	inf	1	no	0	0	0	1	no	#NAME?	0	#VALUE!	0	no	no	no	no
ENSDARG00000075216	ENSDARG00000075216	HIST1H2BD (18 of 32)	chr7:6754501-6755146	0.057877	0	#NAME?	1	no	0.0457981	0	#NAME?	1	no	0.0409258	0.0727047	0.82904	1	no	0	0	0	1	no	#NAME?	#NAME?	-0.82904	0	no	no	no	no
ENSDARG00000088259	ENSDARG00000088259	HIST1H2BD (29 of 32)	chr7:7240068-7240994	0.091014	0	#NAME?	1	no	0.0465099	0.0631896	0.442149	1	no	0.0415619	0.114889	1.46691	1	no	0.0465083	0	#NAME?	1	no	#NAME?	-0.442149	-1.46691	#NAME?	no	no	no	no
ENSDARG00000086751	ENSDARG00000086751	HIST1H2BD (4 of 32)	chr7:76851936-76852311	0.0329615	0	#NAME?	1	no	0.209593	0	#NAME?	1	no	0.18729	0.041406	-2.17736	1	no	0	0	0	1	no	#NAME?	#NAME?	2.17736	0	no	no	no	no
ENSDARG00000091011	ENSDARG00000091011	HIST1H4A	chr25:37351761-37352073	0	0.0724545	inf	1	no	0	0	0	1	no	0	0	0	1	no	0	0.0738893	inf	1	no	#VALUE!	0	0	#VALUE!	no	no	no	no
ENSDARG00000074631	ENSDARG00000074631	HIST1H4D	chr7:6803250-6803562	0.167842	0	#NAME?	1	no	0.161434	0	#NAME?	1	no	0.144259	0.213746	0.567235	1	no	0	0	0	1	no	#NAME?	#NAME?	-0.567235	0	no	no	no	no
ENSDARG00000090591	ENSDARG00000090591	HIST2H4B (2 of 2)	chr25:36204350-36204662	0.113194	0	#NAME?	1	no	0.245039	0.109664	-1.15992	1	no	0.218956	0.143318	-0.611417	1	no	0.080714	0	#NAME?	1	no	#NAME?	1.15992	0.611417	#NAME?	no	no	no	no
ENSDARG00000018108	ENSDARG00000018108	homer1b	chr5:53852857-53908785	0	0.00373846	inf	1	no	0.335939	0.181503	-0.888208	1	no	0.300186	0	#NAME?	1	no	0.133807	0.00381249	-5.13328	1	no	#VALUE!	0.888208	#NAME?	5.13328	no	no	no	no
ENSDARG00000053580	ENSDARG00000053580	htf1fb	chr1:33266866-33267985	0.00616674	0	#NAME?	1	no	0	0	0	1	no	0	0.00774663	inf	1	no	0	0	0	1	no	#NAME?	0	#VALUE!	0	no	no	no	no
ENSDARG00000089212	ENSDARG00000089212	htr3a	chr21:22253597-22255708	0.0682819	0	#NAME?	1	no	0	0	0	1	no	0	0.0857754	inf	1	no	0	0	0	1	no	#NAME?	0	#VALUE!	0	no	no	no	no
ENSDARG00000096416	ENSDARG00000096416	HTR3A	chr21:22250460-22251257	0.586949	0	#NAME?	1	no	0.343086	0.185039	-0.890739	1	no	0.306567	0.738896	1.26917	1	no	0.136587	0	#NAME?	1	no	#NAME?	0.890739	-1.26917	#NAME?	no	no	no	no
ENSDARG00000094741	ENSDARG00000094741	HTRA2 (14 of 30)	chr13:8415364-8665656	0.00630587	0	#NAME?	1	no	0	0.012071	inf	1	no	0	0.0079392	inf	1	no	0.00887775	0	#NAME?	1	no	#NAME?	#VALUE!	#VALUE!	#NAME?	no	no	no	no
ENSDARG00000089070	ENSDARG00000089070	HTRA2 (15 of 30)	chr13:8862104-8882924	0	0.00630653	inf	1	no	0	0	0	1	no	0	0	0	1	no	0	0.00639439	inf	1	no	#VALUE!	0	0	#VALUE!	no	no	no	no
ENSDARG00000092951	ENSDARG00000092951	HTRA2 (17 of 30)	chr10:35063969-35071153	0.0122948	0	#NAME?	1	no	0	0	0	1	no	0	0.0154446	inf	1	no	0	0	0	1	no	#NAME?	0	#VALUE!	0	no	no	no	no
ENSDARG00000092094	ENSDARG00000092094	HTRA2 (19 of 30)	chr13:8385764-8411339	0	0.0310087	inf	1	no	0	0	0	1	no	0	0	0	1	no	0	0.0316227	inf	1	no	#VALUE!	0	0	#VALUE!	no	no	no	no
ENSDARG00000092625	ENSDARG00000092625	HTRA2 (23 of 30)	chr10:35120097-35175085	0.0262973	0	#NAME?	1	no	0.0202021	0.0919561	2.18644	1	no	0.0180512	0.0332725	0.882241	1	no	0.06782	0	#NAME?	1	no	#NAME?	-2.18644	-0.882241	#NAME?	no	no	no	no
ENSDARG00000095545	ENSDARG00000095545	HTRA2 (24 of 30)	chr13:8415364-8665656	0.0151731	0	#NAME?	1	no	0.0664553	0	#NAME?	1	no	0.0593816	0.0193229	-1.61971	1	no	0	0	0	1	no	#NAME?	#NAME?	1.61971	0	no	no	no	no
ENSDARG00000095687	ENSDARG00000095687	HTRA2 (8 of 30)	chr21:4668755-4682831	0.0066462	0	#NAME?	1	no	0.0107065	0.0142904	0.416566	1	no	0.00956655	0.00834892	-0.196409	1	no	0.0105179	0	#NAME?	1	no	#NAME?	-0.416566	0.196409	#NAME?	no	no	no	no
ENSDARG00000094713	ENSDARG00000094713	HTRA2 (9 of 30)	chr10:35101084-35114188	0.0101144	0	#NAME?	1	no	0	0.0198256	inf	1	no	0	0.0128807	inf	1	no	0.0145918	0	#NAME?	1	no	#NAME?	#VALUE!	#VALUE!	#NAME?	no	no	no	no
ENSDARG00000077421	ENSDARG00000077421	HYAL2 (1 of 3)	chr6:54045318-54067137	0.00134983	0	#NAME?	1	no	0	0	0	1	no	0	0.001719	inf	1	no	0	0	0	1	no	#NAME?	0	#VALUE!	0	no	no	no	no
ENSDARG00000045671	ENSDARG00000045671	ifng1-1	chr4:12581969-12582905	0.656815	0	#NAME?	1	no	0.0294241	0	#NAME?	1	no	0.0262913	0.834906	4.98896	1	no	0	0	0	1	no	#NAME?	#NAME?	-4.98896	0	no	no	no	no
ENSDARG00000069012	ENSDARG00000069012	ifnphi2	chr3:22565710-22572180	0.0204028	0	#NAME?	1	no	0	0	0	1	no	0	0.0259907	inf	1	no	0	0	0	1	no	#NAME?	0	#VALUE!	0	no	no	no	no
ENSDARG00000070676	ENSDARG00000070676	ifnphi3	chr3:22558520-22560658	0.0391443	0	#NAME?	1	no	0.211737	0.125179	-0.758282	1	no	0.189198	0.0492302	-1.94228	1	no	0.092316	0	#NAME?	1	no	#NAME?	0.758282	1.94228	#NAME?	no	no	no	no
ENSDARG00000075926	ENSDARG00000075926	IGFN1 (1 of 3)	chr6:46680603-46699591	0.00699737	0	#NAME?	1	no	0.226277	0.110813	-1.02997	1	no	0.202196	0.00885957	-4.51237	1	no	0.0817168	0	#NAME?	1	no	#NAME?	1.02997	4.51237	#NAME?	no	no	no	no
ENSDARG00000096280	ENSDARG00000096280	ighz	chr3:34048542-34145449	0	0.00615294	inf	1	no	0	0.0102799	inf	1	no	0	0	0	1	no	0.00756574	0.00629105	-0.26618	1	no	#VALUE!	#VALUE!	0	0.26618	no	no	no	no
ENSDARG00000074426	ENSDARG00000074426	igl2v4	chr19:23538239-23538725	0	0.0573205	inf	1	no	0	0	0	1	no	0	0	0	1	no	0	0.0584571	inf	1	no	#VALUE!	0	0	#VALUE!	no	no	no	no
ENSDARG00000043934	ENSDARG00000043934	il17a/f2	chr17:12593557-12596932	0.0540484	0	#NAME?	1	no	0.373689	0.122208	-1.6125	1	no	0.333902	0.0683845	-2.28768	1	no	0.0900896	0	#NAME?	1	no	#NAME?	1.6125	2.28768	#NAME?	no	no	no	no
ENSDARG00000093311	ENSDARG00000093311	il17ra2	chr4:32622601-32625293	0.0100226	0	#NAME?	1	no	0	0.0215514	inf	1	no	0	0.0125904	inf	1	no	0.0158621	0	#NAME?	1	no	#NAME?	#VALUE!	#VALUE!	#NAME?	no	no	no	no
ENSDARG00000039070	ENSDARG00000039070	im:7138239	chr2:54088547-54112518	0	0.00896631	inf	1	no	0	0	0	1	no	0	0	0	1	no	0	0.00914388	inf	1	no	#VALUE!	0	0	#VALUE!	no	no	no	no
ENSDARG00000034610	ENSDARG00000034610	insb	chr14:29583202-29588274	0.0105076	0	#NAME?	1	no	0.284508	0.0243697	-3.54531	1	no	0.254231	0.0131998	-4.26755	1	no	0.0179885	0	#NAME?	1	no	#NAME?	3.54531	4.26755	#NAME?	no	no	no	no
ENSDARG00000021055	ENSDARG00000021055	isl1l	chr10:8771214-8778379	0	0.0159971	inf	1	no	0.0149654	0	#NAME?	1	no	0.0133733	0	#NAME?	1	no	0	0.0162727	inf	1	no	#VALUE!	#NAME?	#NAME?	#VALUE!	no	no	no	no
ENSDARG00000013907	ENSDARG00000013907	KBTBD13 (1 of 3)	chr25:30599581-30601152	0	0.0118683	inf	1	no	0.0245254	0.0251894	0.0385389	1	no	0.0219156	0	#NAME?	1	no	0.0185688	0.0120339	-0.625778	1	no	#VALUE!	-0.0385389	#NAME?	0.625778	no	no	no	no
ENSDARG00000002241	ENSDARG00000002241	KCNA2	chr6:49358024-49359589	0.0225559	0	#NAME?	1	no	0.0141325	0.0324495	1.19918	1	no	0.0126284	0.0284186	1.17016	1	no	0.0239323	0	#NAME?	1	no	#NAME?	-1.19918	-1.17016	#NAME?	no	no	no	no
ENSDARG00000046014	ENSDARG00000046014	kcna6	chr25:20437369-20438849	0.0339763	0	#NAME?	1	no	0.056611	0.00950784	-2.57389	1	no	0.0505854	0.042903	-0.237642	1	no	0.00699788	0	#NAME?	1	no	#NAME?	2.57389	0.237642	#NAME?	no	no	no	no
ENSDARG00000037933	ENSDARG00000037933	kcnc3b	chr24:38522345-38682990	0.0186206	0	#NAME?	1	no	0.0341669	0.0504134	0.561209	1	no	0.0305299	0.0234761	-0.379032	1	no	0.0372126	0	#NAME?	1	no	#NAME?	-0.561209	0.379032	#NAME?	no	no	no	no
ENSDARG00000057037	ENSDARG00000057037	kcnk12l	chr21:20185194-20189162	0	0.0144611	inf	1	no	0.0183629	0.0227835	0.311201	1	no	0.0164078	0	#NAME?	1	no	0.016769	0.0147102	-0.188981	1	no	#VALUE!	-0.311201	#NAME?	0.188981	no	no	no	no
ENSDARG00000062906	ENSDARG00000062906	kcnv2b	chr5:9471687-9483668	0.00329569	0	#NAME?	1	no	0	0	0	1	no	0	0.00414003	inf	1	no	0	0	0	1	no	#NAME?	0	#VALUE!	0	no	no	no	no
ENSDARG00000075829	ENSDARG00000075829	kiss1	chr11:24246555-24248357	0.0295308	0	#NAME?	1	no	0.0420101	0.028285	-0.570699	1	no	0.037539	0.037177	-0.0139778	1	no	0.0208181	0	#NAME?	1	no	#NAME?	0.570699	0.0139778	#NAME?	no	no	no	no
ENSDARG00000005814	ENSDARG00000005814	KLHL10 (2 of 2)	chr17:4153721-4162357	0.00407727	0	#NAME?	1	no	0.0178577	0.00799198	-1.15992	1	no	0.0159568	0.00519239	-1.61971	1	no	0.00588219	0	#NAME?	1	no	#NAME?	1.15992	1.61971	#NAME?	no	no	no	no
ENSDARG00000069046	ENSDARG00000069046	KRT39	chr1:59908884-59915757	0	0.00467271	inf	1	no	0.00574611	0	#NAME?	1	no	0.0051348	0	#NAME?	1	no	0	0.00477764	inf	1	no	#VALUE!	#NAME?	#NAME?	#VALUE!	no	no	no	no
ENSDARG00000089031	ENSDARG00000089031	larsa	chr9:56317018-56320752	0.0340434	0	#NAME?	1	no	0.0480003	0.0785915	0.711329	1	no	0.0428937	0.0428581	-0.00119725	1	no	0.0580126	0	#NAME?	1	no	#NAME?	-0.711329	0.00119725	#NAME?	no	no	no	no
ENSDARG00000019920	ENSDARG00000019920	lft1	chr20:35098588-35100995	0.0105173	0	#NAME?	1	no	0.00758682	0	#NAME?	1	no	0.00677967	0.0133938	0.982273	1	no	0	0	0	1	no	#NAME?	#NAME?	-0.982273	0	no	no	no	no
ENSDARG00000007944	ENSDARG00000007944	lhx1b	chr5:57677619-57683358	0	0.00674018	inf	1	no	0.0144106	0.022124	0.618484	1	no	0.0128771	0	#NAME?	1	no	0.016317	0.00683422	-1.25553	1	no	#VALUE!	-0.618484	#NAME?	1.25553	no	no	no	no
ENSDARG00000041295	ENSDARG00000041295	lim2.5	chr16:53692584-53707225	0	0.0139662	inf	1	no	0.36497	0.616853	0.75715	1	no	0.326121	0	#NAME?	1	no	0.454433	0.0142798	-4.99202	1	no	#VALUE!	-0.75715	#NAME?	4.99202	no	no	no	no
ENSDARG00000067815	ENSDARG00000067815	LINGO3	chr2:58084206-58099551	0	0.00855287	inf	1	no	0.0269572	0.023228	-0.214804	1	no	0.0240879	0	#NAME?	1	no	0.0171148	0.00870022	-0.976121	1	no	#VALUE!	0.214804	#NAME?	0.976121	no	no	no	no
ENSDARG00000089268	ENSDARG00000089268	LPCAT4 (2 of 2)	Zv9_NA940:2059-9405	0	0.0310796	inf	1	no	1.85302	1.02766	-0.850522	1	no	1.6558	0	#NAME?	1	no	0.75746	0.0316951	-4.57884	1	no	#VALUE!	0.850522	#NAME?	4.57884	no	no	no	no
ENSDARG00000016739	ENSDARG00000016739	LRRC4C	chr7:51566226-51568122	0.00748585	0	#NAME?	1	no	0.0534352	0.0762964	0.513825	1	no	0.0477472	0.00942412	-2.34099	1	no	0.0563031	0	#NAME?	1	no	#NAME?	-0.513825	2.34099	#NAME?	no	no	no	no
ENSDARG00000054949	ENSDARG00000054949	mc2r	chr16:32879458-32880694	0	0.0138742	inf	1	no	0.0262684	0.0141675	-0.890739	1	no	0.0234723	0	#NAME?	1	no	0.0104578	0.0141132	0.432463	1	no	#VALUE!	0.890739	#NAME?	-0.432463	no	no	no	no
ENSDARG00000037048	ENSDARG00000037048	mchr1a	chr6:18615566-18616604	0.00676576	0	#NAME?	1	no	0	0	0	1	no	0	0.00849911	inf	1	no	0	0	0	1	no	#NAME?	0	#VALUE!	0	no	no	no	no
ENSDARG00000088887	ENSDARG00000088887	MCHR2 (2 of 2)	Zv9_NA491:43859-58507	0	0.00858375	inf	1	no	0.0320445	0.0489067	0.609956	1	no	0.0286336	0	#NAME?	1	no	0.03607	0.00877651	-2.03908	1	no	#VALUE!	-0.609956	#NAME?	2.03908	no	no	no	no
ENSDARG00000017078	ENSDARG00000017078	mespaa	chr7:16098652-16101163	0.00927334	0	#NAME?	1	no	0	0	0	1	no	0	0.0116744	inf	1	no	0	0	0	1	no	#NAME?	0	#VALUE!	0	no	no	no	no
ENSDARG00000030347	ENSDARG00000030347	mespba	chr7:16082276-16085567	0	0.0176473	inf	1	no	0	0.0177659	inf	1	no	0	0	0	1	no	0.0131139	0.0180436	0.460388	1	no	#VALUE!	#VALUE!	0	-0.460388	no	no	no	no
ENSDARG00000086624	ENSDARG00000086624	Metazoa_SRP	chr11:12737663-12737958	0.132924	0	#NAME?	1	no	0	0	0	1	no	0	0.167341	inf	1	no	0	0	0	1	no	#NAME?	0	#VALUE!	0	no	no	no	no
ENSDARG00000086852	ENSDARG00000086852	Metazoa_SRP	chr11:11582181-11582476	0	0.0841174	inf	1	no	0.0937097	0	#NAME?	1	no	0.0837401	0	#NAME?	1	no	0	0.0857832	inf	1	no	#VALUE!	#NAME?	#NAME?	#VALUE!	no	no	no	no
ENSDARG00000088158	ENSDARG00000088158	Metazoa_SRP	chr11:12294351-12294646	0	0.150255	inf	1	no	0	0	0	1	no	0	0	0	1	no	0	0.152844	inf	1	no	#VALUE!	0	0	#VALUE!	no	no	no	no
ENSDARG00000088381	ENSDARG00000088381	Metazoa_SRP	chr11:12236211-12236506	0.0592124	0	#NAME?	1	no	0	0	0	1	no	0	0.0743823	inf	1	no	0	0	0	1	no	#NAME?	0	#VALUE!	0	no	no	no	no
ENSDARG00000088474	ENSDARG00000088474	Metazoa_SRP	chr11:12637035-12637341	0	0.0690626	inf	1	no	0	0	0	1	no	0	0	0	1	no	0	0.0706135	inf	1	no	#VALUE!	0	0	#VALUE!	no	no	no	no
ENSDARG00000088806	ENSDARG00000088806	Metazoa_SRP	chr11:12566453-12566748	0.0592124	0	#NAME?	1	no	0	0	0	1	no	0	0.0743823	inf	1	no	0	0	0	1	no	#NAME?	0	#VALUE!	0	no	no	no	no
ENSDARG00000088930	ENSDARG00000088930	Metazoa_SRP	chr11:11494261-11494556	0	0.0762042	inf	1	no	0	0.127316	inf	1	no	0	0	0	1	no	0.0937064	0.0779154	-0.266239	1	no	#VALUE!	#VALUE!	0	0.266239	no	no	no	no
ENSDARG00000089201	ENSDARG00000089201	Metazoa_SRP	chr11:12287743-12288035	0.0683534	0	#NAME?	1	no	0	0.157799	inf	1	no	0	0.0860519	inf	1	no	0.11648	0	#NAME?	1	no	#NAME?	#VALUE!	#VALUE!	#NAME?	no	no	no	no
ENSDARG00000089408	ENSDARG00000089408	Metazoa_SRP	chr11:12743241-12743529	0	0.0898864	inf	1	no	0.100137	0	#NAME?	1	no	0.0894833	0	#NAME?	1	no	0	0.0916665	inf	1	no	#VALUE!	#NAME?	#NAME?	#VALUE!	no	no	no	no
ENSDARG00000089521	ENSDARG00000089521	Metazoa_SRP	chr11:12769631-12769926	0	0.320643	inf	1	no	0.282806	0.127316	-1.15139	1	no	0.252711	0	#NAME?	1	no	0.0937064	0.327397	1.80482	1	no	#VALUE!	1.15139	#NAME?	-1.80482	no	no	no	no
ENSDARG00000089848	ENSDARG00000089848	Metazoa_SRP	chr11:12258483-12269149	0.064953	0	#NAME?	1	no	0.189096	0.127316	-0.570699	1	no	0.16897	0.0827175	-1.03051	1	no	0.0937064	0	#NAME?	1	no	#NAME?	0.570699	1.03051	#NAME?	no	no	no	no
ENSDARG00000090079	ENSDARG00000090079	Metazoa_SRP	chr11:12552071-12552366	0	0.0762042	inf	1	no	0	0	0	1	no	0	0	0	1	no	0	0.0779154	inf	1	no	#VALUE!	0	0	#VALUE!	no	no	no	no
ENSDARG00000090559	ENSDARG00000090559	Metazoa_SRP	chr11:11505211-11505506	0.125674	0	#NAME?	1	no	0.190772	0	#NAME?	1	no	0.170461	0.158053	-0.109032	1	no	0	0	0	1	no	#NAME?	#NAME?	0.109032	0	no	no	no	no
ENSDARG00000087086	ENSDARG00000087086	MGAT5B (1 of 2)	chr3:59755562-59805990	0	0.015053	inf	1	no	0.0341391	0.123265	1.85226	1	no	0.0305043	0	#NAME?	1	no	0.0908418	0.0153511	-2.56502	1	no	#VALUE!	-1.85226	#NAME?	2.56502	no	no	no	no
ENSDARG00000079722	ENSDARG00000079722	MGAT5B (2 of 2)	chr9:51926663-52019629	0	0.0685164	inf	1	no	0	0	0	1	no	0	0	0	1	no	0	0.0697843	inf	1	no	#VALUE!	0	0	#VALUE!	no	no	no	no
ENSDARG00000074765	ENSDARG00000074765	mhc1zaa	chr3:1109671-1128564	0.00522756	0	#NAME?	1	no	0.532427	0.255423	-1.0597	1	no	0.475774	0.00665728	-6.1592	1	no	0.188217	0	#NAME?	1	no	#NAME?	1.0597	6.1592	#NAME?	no	no	no	no
ENSDARG00000081638	ENSDARG00000081638	mir10c	chr3:23989274-24040647	0	4.49402	inf	1	no	0	0	0	1	no	0	0	0	1	no	0	4.55673	inf	1	no	#VALUE!	0	0	#VALUE!	no	no	no	no
ENSDARG00000082824	ENSDARG00000082824	mir129-1	chr4:18115649-18115739	0	6.7215	inf	1	no	0	0	0	1	no	0	0	0	1	no	0	6.87243	inf	1	no	#VALUE!	0	0	#VALUE!	no	no	no	no
ENSDARG00000080347	ENSDARG00000080347	mir130b	chr5:14501676-14501760	23.1656	0	#NAME?	1	no	47.1758	19.2244	-1.29511	1	no	42.1559	29.1232	-0.533566	1	no	14.1906	0	#NAME?	1	no	#NAME?	1.29511	0.533566	#NAME?	no	no	no	no
ENSDARG00000083537	ENSDARG00000083537	mir133b	chr20:19615421-19617712	0.0232941	0	#NAME?	1	no	31.17	0	#NAME?	1	no	27.8539	0.0233574	-10.2198	1	no	0	0	0	1	no	#NAME?	#NAME?	10.2198	0	no	no	no	no
ENSDARG00000082222	ENSDARG00000082222	mir137-1	chr2:18658780-18658865	7.65015	0	#NAME?	1	no	0	0	0	1	no	0	9.74245	inf	1	no	0	0	0	1	no	#NAME?	0	#VALUE!	0	no	no	no	no
ENSDARG00000082167	ENSDARG00000082167	mir142a	chr5:3156808-3156899	0	6.36661	inf	1	no	0	0	0	1	no	0	0	0	1	no	0	6.50958	inf	1	no	#VALUE!	0	0	#VALUE!	no	no	no	no
ENSDARG00000083365	ENSDARG00000083365	mir148	chr9:1634029-1634108	11.6276	0	#NAME?	1	no	0	0	0	1	no	0	14.6383	inf	1	no	0	0	0	1	no	#NAME?	0	#VALUE!	0	no	no	no	no
ENSDARG00000083395	ENSDARG00000083395	mir153b	chr6:13878096-13896044	0	0.79427	inf	1	no	0	0	0	1	no	0	0	0	1	no	0	0.812106	inf	1	no	#VALUE!	0	0	#VALUE!	no	no	no	no
ENSDARG00000081163	ENSDARG00000081163	mir153c	chr9:7590048-7661138	1.2818	0	#NAME?	1	no	0.90365	0	#NAME?	1	no	0.807512	1.61369	0.998803	1	no	0	0	0	1	no	#NAME?	#NAME?	-0.998803	0	no	no	no	no
ENSDARG00000081837	ENSDARG00000081837	mir15a-2	chr9:30685818-30685920	0	3.23641	inf	1	no	13.921	24.9207	0.840081	1	no	12.4392	0	#NAME?	1	no	18.3419	3.28157	-2.48269	1	no	#VALUE!	-0.840081	#NAME?	2.48269	no	no	no	no
ENSDARG00000080783	ENSDARG00000080783	mir16c	chr9:30685659-30685795	0	0.961669	inf	1	no	6.88604	6.31318	-0.125308	1	no	6.1531	0	#NAME?	1	no	4.65613	0.975087	-2.25553	1	no	#VALUE!	0.125308	#NAME?	2.25553	no	no	no	no
ENSDARG00000081145	ENSDARG00000081145	mir181b-1	chr2:45252629-45252738	4.58305	0	#NAME?	1	no	3.41737	0	#NAME?	1	no	3.05381	5.76382	0.916417	1	no	0	0	0	1	no	#NAME?	#NAME?	-0.916417	0	no	no	no	no
ENSDARG00000082192	ENSDARG00000082192	mir181c	chr3:34282989-34283067	0	14.3329	inf	1	no	0	0	0	1	no	0	0	0	1	no	0	14.6548	inf	1	no	#VALUE!	0	0	#VALUE!	no	no	no	no
ENSDARG00000083309	ENSDARG00000083309	mir196a-1	chr23:36135160-36149312	2.44237	0	#NAME?	1	no	0	6.32357	inf	1	no	0	3.06757	inf	1	no	4.66777	0	#NAME?	1	no	#NAME?	#VALUE!	#VALUE!	#NAME?	no	no	no	no
ENSDARG00000081789	ENSDARG00000081789	mir19b	chr1:2806749-2806836	6.18855	0	#NAME?	1	no	0	0	0	1	no	0	7.77402	inf	1	no	0	0	0	1	no	#NAME?	0	#VALUE!	0	no	no	no	no
ENSDARG00000081779	ENSDARG00000081779	mir203a	chr17:45975668-45975764	4.29838	0	#NAME?	1	no	0	0	0	1	no	0	5.41134	inf	1	no	0	0	0	1	no	#NAME?	0	#VALUE!	0	no	no	no	no
ENSDARG00000082257	ENSDARG00000082257	mir219-1	chr10:10278919-10298323	0	5.52558	inf	0.2149	no	0	0	0	1	no	0	0	0	1	no	0	5.60267	inf	1	no	#VALUE!	0	0	#VALUE!	no	no	no	no
ENSDARG00000080589	ENSDARG00000080589	mir223	chr5:24017734-24017833	0	3.70777	inf	1	no	5.25351	0	#NAME?	1	no	4.6946	0	#NAME?	1	no	0	3.75951	inf	1	no	#VALUE!	#NAME?	#NAME?	#VALUE!	no	no	no	no
ENSDARG00000080952	ENSDARG00000080952	mir30c	chr13:28027956-28028035	10.3593	0	#NAME?	1	no	0	0	0	1	no	0	13.0133	inf	1	no	0	0	0	1	no	#NAME?	0	#VALUE!	0	no	no	no	no
ENSDARG00000081220	ENSDARG00000081220	mir34	chr23:22870365-22900057	4.66947	0	#NAME?	1	no	0	13.7554	inf	1	no	0	5.86576	inf	1	no	10.1571	0	#NAME?	1	no	#NAME?	#VALUE!	#VALUE!	#NAME?	no	no	no	no
ENSDARG00000080708	ENSDARG00000080708	mir375-2	chr9:11848204-11848287	16.5753	0	#NAME?	1	no	25.2431	0	#NAME?	1	no	22.5565	20.9718	-0.10509	1	no	0	0	0	1	no	#NAME?	#NAME?	0.10509	0	no	no	no	no
ENSDARG00000081438	ENSDARG00000081438	mir429	chr23:24360697-24360779	9.25287	0	#NAME?	1	no	0	0	0	1	no	0	11.7835	inf	1	no	0	0	0	1	no	#NAME?	0	#VALUE!	0	no	no	no	no
ENSDARG00000082262	ENSDARG00000082262	mir454a	chr10:34397774-34407792	0	3.38934	inf	1	no	0	2.69158	inf	0.2472	no	0	0	0	1	no	1.98104	3.46073	0.804823	0.6391	no	#VALUE!	#VALUE!	0	-0.804823	no	no	no	no
ENSDARG00000080349	ENSDARG00000080349	mir456	chr17:22590140-22777132	22.2744	0	#NAME?	1	no	22.4717	14.9959	-0.58354	0.61355	no	20.0791	28.2457	0.492338	1	no	11.0373	0	#NAME?	0.18585	no	#NAME?	0.58354	-0.492338	#NAME?	no	no	no	no
ENSDARG00000081629	ENSDARG00000081629	mir7a-3	chr8:448286-473513	1.43399	0	#NAME?	1	no	0	0	0	1	no	0	1.80137	inf	1	no	0	0	0	1	no	#NAME?	0	#VALUE!	0	no	no	no	no
ENSDARG00000081362	ENSDARG00000081362	mir9-5	chr5:49892947-49958085	0	6.91232	inf	0.15395	no	0	0	0	1	no	0	0	0	1	no	0	7.00877	inf	0.10445	no	#VALUE!	0	0	#VALUE!	no	no	no	no
ENSDARG00000082154	ENSDARG00000082154	mir92a-2	chr9:55420211-55420306	4.02315	0	#NAME?	1	no	0	8.65044	inf	1	no	0	5.05386	inf	1	no	6.36683	0	#NAME?	1	no	#NAME?	#VALUE!	#VALUE!	#NAME?	no	no	no	no
ENSDARG00000089196	ENSDARG00000089196	mir92b	chr16:45736480-45736562	0	11.9829	inf	1	no	0	0	0	1	no	0	0	0	1	no	0	12.2202	inf	1	no	#VALUE!	0	0	#VALUE!	no	no	no	no
ENSDARG00000082942	ENSDARG00000082942	mirlet7f	chr11:28379856-28379972	0	2.12785	inf	1	no	2.61666	0	#NAME?	1	no	2.33828	0	#NAME?	1	no	0	2.17564	inf	1	no	#VALUE!	#NAME?	#NAME?	#VALUE!	no	no	no	no
ENSDARG00000091207	ENSDARG00000091207	MLNR	chr15:3057297-3061793	0	0.0281396	inf	1	no	0.0111487	0.0365078	1.71133	1	no	0.00996262	0	#NAME?	1	no	0.0269484	0.028745	0.0931118	1	no	#VALUE!	-1.71133	#NAME?	-0.0931118	no	no	no	no
ENSDARG00000043798	ENSDARG00000043798	ms4a17a.1	chr4:60650929-60804565	0.0596578	0	#NAME?	1	no	0.375247	0.0328358	-3.5145	1	no	0.335309	0.0750635	-2.15931	1	no	0.0241675	0	#NAME?	1	no	#NAME?	3.5145	2.15931	#NAME?	no	no	no	no
ENSDARG00000042947	ENSDARG00000042947	mstna	chr22:12930129-12934633	0	0.00893632	inf	1	no	0.0101335	0.0163	0.685746	1	no	0.00905456	0	#NAME?	1	no	0.0120319	0.00911329	-0.400825	1	no	#VALUE!	-0.685746	#NAME?	0.400825	no	no	no	no
ENSDARG00000012057	ENSDARG00000012057	mtnr1al	chr14:27085351-27103725	0	0.00873771	inf	1	no	0.0423603	0.0467917	0.143537	1	no	0.0378529	0	#NAME?	1	no	0.0344761	0.00893392	-1.94823	1	no	#VALUE!	-0.143537	#NAME?	1.94823	no	no	no	no
ENSDARG00000076684	ENSDARG00000076684	MUC2 (2 of 3)	Zv9_NA447:18069-36827	0.00541298	0	#NAME?	1	no	0	0	0	1	no	0	0.00683293	inf	1	no	0	0	0	1	no	#NAME?	0	#VALUE!	0	no	no	no	no
ENSDARG00000090333	ENSDARG00000090333	MUC21	chr11:45056876-45058136	0.00534325	0	#NAME?	1	no	0.00845624	0	#NAME?	1	no	0.0075566	0.00671216	-0.17096	1	no	0	0	0	1	no	#NAME?	#NAME?	0.17096	0	no	no	no	no
ENSDARG00000069566	ENSDARG00000069566	mucms1	chr1:45594382-45612721	0.00185061	0	#NAME?	1	no	0.0423093	0.0128168	-1.72294	1	no	0.0378055	0.00232978	-4.02033	1	no	0.00946077	0	#NAME?	1	no	#NAME?	1.72294	4.02033	#NAME?	no	no	no	no
ENSDARG00000068255	ENSDARG00000068255	nanos3	chr1:55787172-55788301	0.012947	0	#NAME?	1	no	0.0293074	0.0131161	-1.15992	1	no	0.0261878	0.0162826	-0.685561	1	no	0.00965364	0	#NAME?	1	no	#NAME?	1.15992	0.685561	#NAME?	no	no	no	no
ENSDARG00000057055	ENSDARG00000057055	ndufs8b	chr14:22672373-22680181	0.0195934	0	#NAME?	1	no	0	0.0210644	inf	1	no	0	0.0246133	inf	1	no	0.0155036	0	#NAME?	1	no	#NAME?	#VALUE!	#VALUE!	#NAME?	no	no	no	no
ENSDARG00000057568	ENSDARG00000057568	nefla	chr21:17812614-17882629	0.0211323	0	#NAME?	1	no	0.148867	0.0400198	-1.89524	1	no	0.133022	0.0267214	-2.3156	1	no	0.0294983	0	#NAME?	1	no	#NAME?	1.89524	2.3156	#NAME?	no	no	no	no
ENSDARG00000076377	ENSDARG00000076377	NITR1	chr7:18265531-18265993	0.0343698	0	#NAME?	1	no	0	0.0673694	inf	1	no	0	0.0437699	inf	1	no	0.0495847	0	#NAME?	1	no	#NAME?	#VALUE!	#VALUE!	#NAME?	no	no	no	no
ENSDARG00000078713	ENSDARG00000078713	nitr1a	chr7:18472045-18473949	0.0297671	0	#NAME?	1	no	0	0	0	1	no	0	0.0376627	inf	1	no	0	0	0	1	no	#NAME?	0	#VALUE!	0	no	no	no	no
ENSDARG00000069876	ENSDARG00000069876	nitr1c	chr7:18305373-18307200	0.00825305	0	#NAME?	1	no	0	0	0	1	no	0	0.0105102	inf	1	no	0	0	0	1	no	#NAME?	0	#VALUE!	0	no	no	no	no
ENSDARG00000077908	ENSDARG00000077908	nitr1i	chr7:18255759-18257409	0.014772	0	#NAME?	1	no	0.0111487	0.0151469	0.442149	1	no	0.00996262	0.0186903	0.90769	1	no	0.0111483	0	#NAME?	1	no	#NAME?	-0.442149	-0.90769	#NAME?	no	no	no	no
ENSDARG00000068024	ENSDARG00000068024	nitr1j	chr7:18250306-18251441	0	0.0129715	inf	1	no	0	0	0	1	no	0	0	0	1	no	0	0.0132283	inf	1	no	#VALUE!	0	0	#VALUE!	no	no	no	no
ENSDARG00000022761	ENSDARG00000022761	nitr1m	chr7:18224188-18225800	0.00686046	0	#NAME?	1	no	0	0	0	1	no	0	0.00861807	inf	1	no	0	0	0	1	no	#NAME?	0	#VALUE!	0	no	no	no	no
ENSDARG00000077998	ENSDARG00000077998	nitr3a	chr7:18526192-18530023	0.0382081	0	#NAME?	1	no	0	0	0	1	no	0	0.0486579	inf	1	no	0	0	0	1	no	#NAME?	0	#VALUE!	0	no	no	no	no
ENSDARG00000089774	ENSDARG00000089774	nitr3a	chr7:18160342-18164602	0.0384022	0	#NAME?	1	no	0.0310166	0	#NAME?	1	no	0.0277155	0.0486296	0.811141	1	no	0	0	0	1	no	#NAME?	#NAME?	-0.811141	0	no	no	no	no
ENSDARG00000057744	ENSDARG00000057744	nitr3b	chr7:18176347-18179677	0.0237644	0	#NAME?	1	no	0.01772	0	#NAME?	1	no	0.0158348	0.029887	0.916417	1	no	0	0	0	1	no	#NAME?	#NAME?	-0.916417	0	no	no	no	no
ENSDARG00000057760	ENSDARG00000057760	nitr3c	chr7:18169625-18175980	0.0054407	0	#NAME?	1	no	0.0261402	0.0143406	-0.866166	1	no	0.0233577	0.00683471	-1.77295	1	no	0.0105547	0	#NAME?	1	no	#NAME?	0.866166	1.77295	#NAME?	no	no	no	no
ENSDARG00000057956	ENSDARG00000057956	nitr6a	chr7:18339813-18341988	0	0.0132284	inf	1	no	0.0165583	0	#NAME?	1	no	0.0147953	0	#NAME?	1	no	0	0.0135255	inf	1	no	#VALUE!	#NAME?	#NAME?	#VALUE!	no	no	no	no
ENSDARG00000090606	ENSDARG00000090606	nitr6b	chr7:18888768-18890710	0.0960544	0	#NAME?	1	no	0.117129	0.101284	-0.209687	1	no	0.104664	0.12159	0.216264	1	no	0.0746278	0	#NAME?	1	no	#NAME?	0.209687	-0.216264	#NAME?	no	no	no	no
ENSDARG00000057780	ENSDARG00000057780	nitr8	chr7:18104782-18108313	0	0.0170796	inf	1	no	0.0486171	0	#NAME?	1	no	0.0434438	0	#NAME?	1	no	0	0.0173178	inf	1	no	#VALUE!	#NAME?	#NAME?	#VALUE!	no	no	no	no
ENSDARG00000069427	ENSDARG00000069427	nkain2	chr20:39833546-40145192	0.108504	0	#NAME?	1	no	0.301312	0.135743	-1.15038	1	no	0.269253	0.136712	-0.977827	1	no	0.100088	0	#NAME?	1	no	#NAME?	1.15038	0.977827	#NAME?	no	no	no	no
ENSDARG00000069984	ENSDARG00000069984	nkd3	chr19:45485018-45487081	0.0147338	0	#NAME?	1	no	0.00715699	0	#NAME?	1	no	0.00639498	0.0186908	1.54732	1	no	0	0	0	1	no	#NAME?	#NAME?	-1.54732	0	no	no	no	no
ENSDARG00000070419	ENSDARG00000070419	nkd3l	chr19:34732825-34734945	0.00425516	0	#NAME?	1	no	0	0	0	1	no	0	0.00534531	inf	1	no	0	0	0	1	no	#NAME?	0	#VALUE!	0	no	no	no	no
ENSDARG00000012697	ENSDARG00000012697	nkx1.2lb	chr14:18964853-18968546	0	0.00455032	inf	1	no	0.016988	0.0442634	1.3816	1	no	0.0151796	0	#NAME?	1	no	0.0326551	0.00465241	-2.81126	1	no	#VALUE!	-1.3816	#NAME?	2.81126	no	no	no	no
ENSDARG00000020332	ENSDARG00000020332	nkx2.9	chr17:38403986-38458583	0.00586635	0	#NAME?	1	no	0.0563609	0.0278162	-1.01877	1	no	0.0503617	0.007369	-2.77279	1	no	0.020507	0	#NAME?	1	no	#NAME?	1.01877	2.77279	#NAME?	no	no	no	no
ENSDARG00000060884	ENSDARG00000060884	NMUR1 (1 of 2)	chr22:38360851-38365231	0	0.0128099	inf	1	no	0	0	0	1	no	0	0	0	1	no	0	0.0129886	inf	1	no	#VALUE!	0	0	#VALUE!	no	no	no	no
ENSDARG00000058917	ENSDARG00000058917	nnr	chr15:1585056-1586064	0.0143299	0	#NAME?	1	no	0	0	0	1	no	0	0.0182491	inf	1	no	0	0	0	1	no	#NAME?	0	#VALUE!	0	no	no	no	no
ENSDARG00000059182	ENSDARG00000059182	nog5	chr3:83256-83889	0.0147654	0	#NAME?	1	no	0	0.0340869	inf	1	no	0	0.0185885	inf	1	no	0.0251614	0	#NAME?	1	no	#NAME?	#VALUE!	#VALUE!	#NAME?	no	no	no	no
ENSDARG00000061920	ENSDARG00000061920	NPAS4 (2 of 3)	chr21:24867774-24870848	0	0.00450737	inf	1	no	0	0	0	1	no	0	0	0	1	no	0	0.00460858	inf	1	no	#VALUE!	0	0	#VALUE!	no	no	no	no
ENSDARG00000053963	ENSDARG00000053963	NPM2	chr10:45752920-45759514	0.011951	0	#NAME?	1	no	0.017152	0	#NAME?	1	no	0.0153258	0.0150454	-0.0266461	1	no	0	0	0	1	no	#NAME?	#NAME?	0.0266461	0	no	no	no	no
ENSDARG00000094648	ENSDARG00000094648	NPNT (2 of 2)	chr1:35570664-35576058	0	0.012185	inf	1	no	0.0299684	0.0245338	-0.288671	1	no	0.0267801	0	#NAME?	1	no	0.0181097	0.0124587	-0.539612	1	no	#VALUE!	0.288671	#NAME?	0.539612	no	no	no	no
ENSDARG00000036227	ENSDARG00000036227	npvf	chr19:20459286-20462429	0.00548347	0	#NAME?	1	no	0	0	0	1	no	0	0.0068883	inf	1	no	0	0	0	1	no	#NAME?	0	#VALUE!	0	no	no	no	no
ENSDARG00000089943	ENSDARG00000089943	NPY2R (1 of 3)	chr1:9397670-9411440	0.0137688	0	#NAME?	1	no	0	0	0	1	no	0	0.0174667	inf	1	no	0	0	0	1	no	#NAME?	0	#VALUE!	0	no	no	no	no
ENSDARG00000009905	ENSDARG00000009905	ntla	chr19:30633856-30637909	0	0.0123859	inf	1	no	0.0674402	0	#NAME?	1	no	0.0602643	0	#NAME?	1	no	0	0.0126312	inf	1	no	#VALUE!	#NAME?	#NAME?	#VALUE!	no	no	no	no
ENSDARG00000039806	ENSDARG00000039806	ntlb	chr13:4095613-4108100	0.00526841	0	#NAME?	1	no	0.0168247	0	#NAME?	1	no	0.0150341	0.00661814	-1.18374	1	no	0	0	0	1	no	#NAME?	#NAME?	1.18374	0	no	no	no	no
ENSDARG00000057417	ENSDARG00000057417	NUDT13 (1 of 2)	chr12:10273405-10284926	0.0147654	0	#NAME?	1	no	0.0832752	0	#NAME?	1	no	0.0744158	0.0185885	-2.0012	1	no	0	0	0	1	no	#NAME?	#NAME?	2.0012	0	no	no	no	no
ENSDARG00000074416	ENSDARG00000074416	OFCC1 (2 of 2)	Zv9_NA461:22626-70442	0	0.00580328	inf	1	no	0.024815	0.013463	-0.882212	1	no	0.0221743	0	#NAME?	1	no	0.00993775	0.00588425	-0.756061	1	no	#VALUE!	0.882212	#NAME?	0.756061	no	no	no	no
ENSDARG00000008095	ENSDARG00000008095	olfcd1	chr18:31441115-31445310	0.00268925	0	#NAME?	1	no	0	0	0	1	no	0	0.00342476	inf	1	no	0	0	0	1	no	#NAME?	0	#VALUE!	0	no	no	no	no
ENSDARG00000055949	ENSDARG00000055949	olfcd2	Zv9_scaffold3499:28769-31890	0	0.00268284	inf	1	no	0	0	0	1	no	0	0	0	1	no	0	0.00272027	inf	1	no	#VALUE!	0	0	#VALUE!	no	no	no	no
ENSDARG00000011604	ENSDARG00000011604	olfcg1	chr14:17755323-17758629	0.00266887	0	#NAME?	1	no	0.00391936	0	#NAME?	1	no	0.00350206	0.0033988	-0.0431759	1	no	0	0	0	1	no	#NAME?	#NAME?	0.0431759	0	no	no	no	no
ENSDARG00000074253	ENSDARG00000074253	olig3	chr13:1177251-1180015	0.0172759	0	#NAME?	1	no	0.0268603	0.00500886	-2.42292	1	no	0.0240017	0.0219613	-0.128173	1	no	0.00368658	0	#NAME?	1	no	#NAME?	2.42292	0.128173	#NAME?	no	no	no	no
ENSDARG00000095923	ENSDARG00000095923	olig3	chr13:1177251-1180015	0.0771974	0	#NAME?	1	no	0.041961	0	#NAME?	1	no	0.0374934	0.097163	1.37377	1	no	0	0	0	1	no	#NAME?	#NAME?	-1.37377	0	no	no	no	no
ENSDARG00000044329	ENSDARG00000044329	opa1	chr6:36666466-36743658	0	0.00505238	inf	1	no	0.863866	1.21008	0.48622	1	no	0.771922	0	#NAME?	1	no	0.891944	0.00513436	-7.44062	1	no	#VALUE!	-0.48622	#NAME?	7.44062	no	no	no	no
ENSDARG00000044862	ENSDARG00000044862	opn1lw1	chr11:26411201-26413596	0	0.0042155	inf	1	no	0.0059729	0	#NAME?	1	no	0.00533746	0	#NAME?	1	no	0	0.00427432	inf	1	no	#VALUE!	#NAME?	#NAME?	#VALUE!	no	no	no	no
ENSDARG00000051908	ENSDARG00000051908	opn4xb	chr5:8496321-8532617	0	0.0374257	inf	1	no	0.212077	0.0418068	-2.34278	1	no	0.189508	0	#NAME?	1	no	0.0307876	0.0381775	0.310374	1	no	#VALUE!	2.34278	#NAME?	-0.310374	no	no	no	no
ENSDARG00000013014	ENSDARG00000013014	or101-1	chr21:39151876-39153417	0	0.0189396	inf	1	no	0	0	0	1	no	0	0	0	1	no	0	0.0192659	inf	1	no	#VALUE!	0	0	#VALUE!	no	no	no	no
ENSDARG00000094080	ENSDARG00000094080	or103-1	chr15:30719091-30728409	0	0.00683522	inf	1	no	0	0	0	1	no	0	0	0	1	no	0	0.00693059	inf	1	no	#VALUE!	0	0	#VALUE!	no	no	no	no
ENSDARG00000075128	ENSDARG00000075128	or103-5	chr15:30719091-30728409	0	0.0128561	inf	1	no	0	0	0	1	no	0	0	0	1	no	0	0.0130636	inf	1	no	#VALUE!	0	0	#VALUE!	no	no	no	no
ENSDARG00000068659	ENSDARG00000068659	or104-2	chr10:37529387-37530746	0.00488521	0	#NAME?	1	no	0	0	0	1	no	0	0.00613677	inf	1	no	0	0	0	1	no	#NAME?	0	#VALUE!	0	no	no	no	no
ENSDARG00000091172	ENSDARG00000091172	or110-2	chr10:37432819-37434043	0.00858014	0	#NAME?	1	no	0.0123137	0	#NAME?	1	no	0.0110026	0.0108022	-0.0265182	1	no	0	0	0	1	no	#NAME?	#NAME?	0.0265182	0	no	no	no	no
ENSDARG00000086633	ENSDARG00000086633	or111-3	chr15:30662260-30664294	0.00444623	0	#NAME?	1	no	0	0	0	1	no	0	0.0056623	inf	1	no	0	0	0	1	no	#NAME?	0	#VALUE!	0	no	no	no	no
ENSDARG00000088846	ENSDARG00000088846	or111-4	chr15:30668741-30669796	0.0147158	0	#NAME?	1	no	0	0	0	1	no	0	0.0186321	inf	1	no	0	0	0	1	no	#NAME?	0	#VALUE!	0	no	no	no	no
ENSDARG00000091791	ENSDARG00000091791	or111-5	chr15:30679885-30681113	0	0.0123094	inf	1	no	0	0.0118479	inf	1	no	0	0	0	1	no	0.00872022	0.0124811	0.517312	1	no	#VALUE!	#VALUE!	0	-0.517312	no	no	no	no
ENSDARG00000088453	ENSDARG00000088453	or111-7	chr15:30697655-30698831	0	0.00648399	inf	1	no	0	0	0	1	no	0	0	0	1	no	0	0.00657446	inf	1	no	#VALUE!	0	0	#VALUE!	no	no	no	no
ENSDARG00000044337	ENSDARG00000044337	or115-6	chr21:39116408-39118522	0.00560961	0	#NAME?	1	no	0	0	0	1	no	0	0.00706208	inf	1	no	0	0	0	1	no	#NAME?	0	#VALUE!	0	no	no	no	no
ENSDARG00000095060	ENSDARG00000095060	or127-1	chr15:5120643-5121588	0.00835331	0	#NAME?	1	no	0	0	0	1	no	0	0.0106379	inf	1	no	0	0	0	1	no	#NAME?	0	#VALUE!	0	no	no	no	no
ENSDARG00000058762	ENSDARG00000058762	or128-3	chr15:5087987-5088899	0	0.0113223	inf	1	no	0	0	0	1	no	0	0	0	1	no	0	0.0115465	inf	1	no	#VALUE!	0	0	#VALUE!	no	no	no	no
ENSDARG00000095656	ENSDARG00000095656	or132-1	chr21:24601058-24602030	0	0.00820657	inf	1	no	0.0118359	0.0157979	0.416566	1	no	0.0105757	0	#NAME?	1	no	0.0116274	0.00832108	-0.482688	1	no	#VALUE!	-0.416566	#NAME?	0.482688	no	no	no	no
ENSDARG00000094153	ENSDARG00000094153	or132-4	chr21:24631954-24632923	0.00827918	0	#NAME?	1	no	0	0.0475795	inf	1	no	0	0.0104229	inf	1	no	0.0350191	0	#NAME?	1	no	#NAME?	#VALUE!	#VALUE!	#NAME?	no	no	no	no
ENSDARG00000055458	ENSDARG00000055458	or136-1	chr6:52895560-52896655	0	0.0196001	inf	1	no	0	0	0	1	no	0	0	0	1	no	0	0.0200403	inf	1	no	#VALUE!	0	0	#VALUE!	no	no	no	no
ENSDARG00000055465	ENSDARG00000055465	or137-1	chr6:52871412-52872345	0.00849083	0	#NAME?	1	no	0	0.020057	inf	1	no	0	0.0108131	inf	1	no	0.0148052	0	#NAME?	1	no	#NAME?	#VALUE!	#VALUE!	#NAME?	no	no	no	no
ENSDARG00000059315	ENSDARG00000059315	ora3	chr22:364676-365331	0	0.028134	inf	1	no	0	0	0	1	no	0	0	0	1	no	0	0.0286911	inf	1	no	#VALUE!	0	0	#VALUE!	no	no	no	no
ENSDARG00000078257	ENSDARG00000078257	ora5	chr10:1617301-1617802	0	0.0244571	inf	1	no	0	0.0408612	inf	1	no	0	0	0	1	no	0.0300743	0.0250063	-0.266239	1	no	#VALUE!	#VALUE!	0	0.266239	no	no	no	no
ENSDARG00000043483	ENSDARG00000043483	otx5	chr15:46861775-46867193	0.00365669	0	#NAME?	1	no	0.0530156	0	#NAME?	1	no	0.047371	0.00459351	-3.36633	1	no	0	0	0	1	no	#NAME?	#NAME?	3.36633	0	no	no	no	no
ENSDARG00000078743	ENSDARG00000078743	oxgr1a.2	chr1:1831298-1832315	0.0077903	0	#NAME?	1	no	0.0111806	0	#NAME?	1	no	0.00999022	0.0098074	-0.0266461	1	no	0	0	0	1	no	#NAME?	#NAME?	0.0266461	0	no	no	no	no
ENSDARG00000074160	ENSDARG00000074160	PAQR4 (2 of 2)	chr12:14270749-14282962	0.0092249	0	#NAME?	1	no	0.0135472	0.0217911	0.685746	1	no	0.0121048	0.0117479	-0.0431759	1	no	0.0160851	0	#NAME?	1	no	#NAME?	-0.685746	0.0431759	#NAME?	no	no	no	no
ENSDARG00000028348	ENSDARG00000028348	pax3b	chr15:40690661-40733987	0.00999096	0	#NAME?	1	no	0.0361646	0	#NAME?	1	no	0.0323165	0.0127235	-1.34478	1	no	0	0	0	1	no	#NAME?	#NAME?	1.34478	0	no	no	no	no
ENSDARG00000086030	ENSDARG00000086030	PCBP3 (2 of 2)	Zv9_NA887:24709-53849	0	0.00629799	inf	1	no	0.0157666	0	#NAME?	1	no	0.0140879	0	#NAME?	1	no	0	0.00643942	inf	1	no	#VALUE!	#NAME?	#NAME?	#VALUE!	no	no	no	no
ENSDARG00000043951	ENSDARG00000043951	pcdh1g9	chr10:21767294-21770275	0	0.00673785	inf	1	no	0.00443582	0.00726282	0.711329	1	no	0.0039639	0	#NAME?	1	no	0.00536108	0.00686254	0.356219	1	no	#VALUE!	-0.711329	#NAME?	-0.356219	no	no	no	no
ENSDARG00000037695	ENSDARG00000037695	pcdh2aa1	chr14:2389105-2391457	0.00294829	0	#NAME?	1	no	0.00415702	0	#NAME?	1	no	0.00371476	0.00371168	-0.00119725	1	no	0	0	0	1	no	#NAME?	#NAME?	0.00119725	0	no	no	no	no
ENSDARG00000090348	ENSDARG00000090348	pcdh2ab5	chr14:2507188-2509570	0	0.00701399	inf	1	no	0	0.00671257	inf	1	no	0	0	0	1	no	0.00495491	0.00716174	0.53145	1	no	#VALUE!	#VALUE!	0	-0.53145	no	no	no	no
ENSDARG00000076459	ENSDARG00000076459	pcdhb	chr14:2563598-2564042	0.0728383	0	#NAME?	1	no	0.0378877	0	#NAME?	1	no	0.0338538	0.0919455	1.44146	1	no	0	0	0	1	no	#NAME?	#NAME?	-1.44146	0	no	no	no	no
ENSDARG00000089900	ENSDARG00000089900	PEBP4	chr8:52800564-52970942	0.06142	0	#NAME?	1	no	0.0457981	0	#NAME?	1	no	0.0409258	0.0772442	0.916417	1	no	0	0	0	1	no	#NAME?	#NAME?	-0.916417	0	no	no	no	no
ENSDARG00000054048	ENSDARG00000054048	plin1	chr18:25014406-25060329	0.0105671	0	#NAME?	1	no	0	0	0	1	no	0	0.0132743	inf	1	no	0	0	0	1	no	#NAME?	0	#VALUE!	0	no	no	no	no
ENSDARG00000076978	ENSDARG00000076978	pmchl	chr5:55103683-55104276	0	0.0162046	inf	1	no	0	0	0	1	no	0	0	0	1	no	0	0.0164307	inf	1	no	#VALUE!	0	0	#VALUE!	no	no	no	no
ENSDARG00000087389	ENSDARG00000087389	PMFBP1 (2 of 2)	chr7:69871348-69896888	0.0836476	0	#NAME?	1	no	0.0838169	0.120583	0.524718	1	no	0.0748963	0.10549	0.494142	1	no	0.0888479	0	#NAME?	1	no	#NAME?	-0.524718	-0.494142	#NAME?	no	no	no	no
ENSDARG00000025899	ENSDARG00000025899	pnx	chr10:2826476-2829049	0.0663131	0	#NAME?	1	no	0.113622	0.0614349	-0.887118	1	no	0.101531	0.0836952	-0.278702	1	no	0.0452663	0	#NAME?	1	no	#NAME?	0.887118	0.278702	#NAME?	no	no	no	no
ENSDARG00000074274	ENSDARG00000074274	POLR2E (2 of 2)	chr2:57385083-57398104	0.0146628	0	#NAME?	1	no	0.0210441	0.056177	1.41657	1	no	0.0188035	0.0184594	-0.0266461	1	no	0.0413469	0	#NAME?	1	no	#NAME?	-1.41657	0.0266461	#NAME?	no	no	no	no
ENSDARG00000006206	ENSDARG00000006206	pou4f3	chr9:56377291-56379908	0	0.0263026	inf	1	no	0.046884	0.0113273	-2.04929	1	no	0.0418933	0	#NAME?	1	no	0.00833703	0.0268255	1.686	1	no	#VALUE!	2.04929	#NAME?	-1.686	no	no	no	no
ENSDARG00000067798	ENSDARG00000067798	ppapdc1a	chr13:2635302-2681877	0	0.0107193	inf	1	no	0	0.0661375	inf	1	no	0	0	0	1	no	0.0487312	0.0108689	-2.16465	1	no	#VALUE!	#VALUE!	0	2.16465	no	no	no	no
ENSDARG00000053673	ENSDARG00000053673	PPP2R2B (2 of 3)	chr21:40438886-40466760	0.00528321	0	#NAME?	1	no	0.0167224	0.0113598	-0.557851	1	no	0.0149434	0.00663673	-1.17096	1	no	0.00836092	0	#NAME?	1	no	#NAME?	0.557851	1.17096	#NAME?	no	no	no	no
ENSDARG00000021444	ENSDARG00000021444	prf1.2	chr19:24647376-24649510	0	0.00477373	inf	1	no	0.00587017	0	#NAME?	1	no	0.00524566	0	#NAME?	1	no	0	0.00488093	inf	1	no	#VALUE!	#NAME?	#NAME?	#VALUE!	no	no	no	no
ENSDARG00000089259	ENSDARG00000089259	prf1.8	chr19:24707532-24709807	0	0.00426136	inf	1	no	0.00589347	0.00964986	0.711391	1	no	0.00526648	0	#NAME?	1	no	0.00712292	0.00435705	-0.709116	1	no	#VALUE!	-0.711391	#NAME?	0.709116	no	no	no	no
ENSDARG00000037946	ENSDARG00000037946	prl	chr3:32478892-32482876	0	0.305886	inf	1	no	0.00747253	0.0223872	1.58301	1	no	0.00667754	0	#NAME?	1	no	0.0165035	0.310153	4.23214	1	no	#VALUE!	-1.58301	#NAME?	-4.23214	no	no	no	no
ENSDARG00000039756	ENSDARG00000039756	prop1	chr13:8040622-8047009	0	0.0194532	inf	1	no	0	0.0465613	inf	1	no	0	0	0	1	no	0.0343681	0.0197246	-0.801075	1	no	#VALUE!	#VALUE!	0	0.801075	no	no	no	no
ENSDARG00000014840	ENSDARG00000014840	prph2b	chr13:2942180-2948003	0	0.00294349	inf	1	no	0.101736	0.00682859	-3.8971	1	no	0.0909049	0	#NAME?	1	no	0.00504055	0.00298456	-0.756061	1	no	#VALUE!	3.8971	#NAME?	0.756061	no	no	no	no
ENSDARG00000078253	ENSDARG00000078253	PSMB11 (1 of 2)	chr2:38073354-38074482	0.01832	0	#NAME?	1	no	0.0391764	0	#NAME?	1	no	0.0350061	0.0230135	-0.605126	1	no	0	0	0	1	no	#NAME?	#NAME?	0.605126	0	no	no	no	no
ENSDARG00000026238	ENSDARG00000026238	ptgfr	chr11:13172025-13177890	0.00576945	0	#NAME?	1	no	0.0092941	0	#NAME?	1	no	0.00830455	0.00724755	-0.196409	1	no	0	0	0	1	no	#NAME?	#NAME?	0.196409	0	no	no	no	no
ENSDARG00000090118	ENSDARG00000090118	QDPR (7 of 7)	chr1:23162515-23166530	0	0.00683567	inf	1	no	0	0	0	1	no	0	0	0	1	no	0	0.00693104	inf	1	no	#VALUE!	0	0	#VALUE!	no	no	no	no
ENSDARG00000062293	ENSDARG00000062293	qpctlb	chr21:20153912-20164312	0.00580507	0	#NAME?	1	no	0.0464287	0.0124819	-1.89518	1	no	0.0414869	0.00729229	-2.50821	1	no	0.00918679	0	#NAME?	1	no	#NAME?	1.89518	2.50821	#NAME?	no	no	no	no
ENSDARG00000062314	ENSDARG00000062314	rasl10a	chr5:26392339-26419221	0.092096	0	#NAME?	1	no	0.0887376	0.0655831	-0.436222	1	no	0.0792915	0.116605	0.556395	1	no	0.0483467	0	#NAME?	1	no	#NAME?	0.436222	-0.556395	#NAME?	no	no	no	no
ENSDARG00000088166	ENSDARG00000088166	RBBP6 (16 of 71)	chr11:12616985-12618637	0.00977879	0	#NAME?	1	no	0	0.0191677	inf	1	no	0	0.0124533	inf	1	no	0.0141077	0	#NAME?	1	no	#NAME?	#VALUE!	#VALUE!	#NAME?	no	no	no	no
ENSDARG00000092356	ENSDARG00000092356	RBBP6 (23 of 71)	chr11:12557357-12558978	0.0100536	0	#NAME?	1	no	0.0567014	0	#NAME?	1	no	0.0506691	0.0126568	-2.0012	1	no	0	0	0	1	no	#NAME?	#NAME?	2.0012	0	no	no	no	no
ENSDARG00000094291	ENSDARG00000094291	RBBP6 (3 of 71)	chr9:28784086-28823963	0	0.0219721	inf	1	no	0	0	0	1	no	0	0	0	1	no	0	0.0224655	inf	1	no	#VALUE!	0	0	#VALUE!	no	no	no	no
ENSDARG00000056907	ENSDARG00000056907	RBBP6 (57 of 71)	chr9:28837584-28839390	0.0193728	0	#NAME?	1	no	0	0	0	1	no	0	0.0243889	inf	1	no	0	0	0	1	no	#NAME?	0	#VALUE!	0	no	no	no	no
ENSDARG00000095000	ENSDARG00000095000	RBBP6 (61 of 71)	chr11:12520357-12521700	0.0385739	0	#NAME?	1	no	0.0283237	0.0833646	1.55742	1	no	0.0253081	0.0491238	0.956824	1	no	0.0614549	0	#NAME?	1	no	#NAME?	-1.55742	-0.956824	#NAME?	no	no	no	no
ENSDARG00000094152	ENSDARG00000094152	RBBP6 (65 of 71)	chr11:12586178-12587506	0	0.0196387	inf	1	no	0	0	0	1	no	0	0	0	1	no	0	0.0199127	inf	1	no	#VALUE!	0	0	#VALUE!	no	no	no	no
ENSDARG00000077475	ENSDARG00000077475	RBBP6 (68 of 71)	chr11:12746576-12763702	0.0100696	0	#NAME?	1	no	0.0141979	0.0232464	0.711329	1	no	0.0126874	0.0126769	-0.00119725	1	no	0.0171594	0	#NAME?	1	no	#NAME?	-0.711329	0.00119725	#NAME?	no	no	no	no
ENSDARG00000091135	ENSDARG00000091135	RD3L	chr20:20785544-20794779	0	0.00754074	inf	1	no	0.0279849	0.0151828	-0.882212	1	no	0.0250068	0	#NAME?	1	no	0.0112072	0.00771007	-0.539612	1	no	#VALUE!	0.882212	#NAME?	0.539612	no	no	no	no
ENSDARG00000052661	ENSDARG00000052661	reep5	chr10:8481813-8503694	0.00614885	0	#NAME?	1	no	0.0174945	0	#NAME?	1	no	0.0156326	0.00774094	-1.01398	1	no	0	0	0	1	no	#NAME?	#NAME?	1.01398	0	no	no	no	no
ENSDARG00000091537	ENSDARG00000091537	reep5	chr10:8592685-8614404	0.00709822	0	#NAME?	1	no	0.010424	0	#NAME?	1	no	0.00931419	0.00903957	-0.0431759	1	no	0	0	0	1	no	#NAME?	#NAME?	0.0431759	0	no	no	no	no
ENSDARG00000087349	ENSDARG00000087349	reep6	chr11:7260821-7273187	0.00476152	0	#NAME?	1	no	0	0.0102381	inf	1	no	0	0.00598139	inf	1	no	0.00753533	0	#NAME?	1	no	#NAME?	#VALUE!	#VALUE!	#NAME?	no	no	no	no
ENSDARG00000070666	ENSDARG00000070666	rhol	chr11:19515775-19518090	0.0133637	0	#NAME?	1	no	0.0214521	0	#NAME?	1	no	0.0191684	0.0167874	-0.191355	1	no	0	0	0	1	no	#NAME?	#NAME?	0.191355	0	no	no	no	no
ENSDARG00000070535	ENSDARG00000070535	ripply2	chr4:681198-683374	0.0703599	0	#NAME?	1	no	0.204557	0.14415	-0.504933	1	no	0.182782	0.0893424	-1.03271	1	no	0.106184	0	#NAME?	1	no	#NAME?	0.504933	1.03271	#NAME?	no	no	no	no
ENSDARG00000076983	ENSDARG00000076983	rnasel4	chr22:6178280-6182827	0.0287898	0	#NAME?	1	no	0.381058	0.455551	0.257603	1	no	0.340511	0.0361658	-3.23501	1	no	0.336089	0	#NAME?	1	no	#NAME?	-0.257603	3.23501	#NAME?	no	no	no	no
ENSDARG00000061049	ENSDARG00000061049	RNF182	chr2:31522456-31523479	0	0.0186543	inf	1	no	0.0218073	0.0296279	0.442149	1	no	0.0194873	0	#NAME?	1	no	0.0218065	0.0190472	-0.195177	1	no	#VALUE!	-0.442149	#NAME?	0.195177	no	no	no	no
ENSDARG00000087746	ENSDARG00000087746	ROCK2 (4 of 9)	Zv9_NA131:4576-8351	0	0.0572547	inf	1	no	0.0753864	0.051211	-0.557851	1	no	0.0673662	0	#NAME?	1	no	0.0376919	0.0583142	0.629592	1	no	#VALUE!	0.557851	#NAME?	-0.629592	no	no	no	no
ENSDARG00000088333	ENSDARG00000088333	ROCK2 (8 of 9)	Zv9_NA269:2458-4641	0.0209079	0	#NAME?	1	no	0.0900209	0.0400517	-1.1684	1	no	0.0804363	0.0263214	-1.61161	1	no	0.0294785	0	#NAME?	1	no	#NAME?	1.1684	1.61161	#NAME?	no	no	no	no
ENSDARG00000026926	ENSDARG00000026926	rom1b	chr14:48610354-48634803	0	0.0132421	inf	1	no	0.0775212	0	#NAME?	1	no	0.0692723	0	#NAME?	1	no	0	0.0134269	inf	1	no	#VALUE!	#NAME?	#NAME?	#VALUE!	no	no	no	no
ENSDARG00000007480	ENSDARG00000007480	rpe65a	chr2:2448546-2463377	0	0.00520483	inf	1	no	0.0648193	0.00949371	-2.77138	1	no	0.0579184	0	#NAME?	1	no	0.00700782	0.0053079	-0.400825	1	no	#VALUE!	2.77138	#NAME?	0.400825	no	no	no	no
ENSDARG00000027236	ENSDARG00000027236	rs1	chr11:31119809-31127552	0.00552138	0	#NAME?	1	no	0.0745276	0	#NAME?	1	no	0.0665926	0.00703146	-3.24347	1	no	0	0	0	1	no	#NAME?	#NAME?	3.24347	0	no	no	no	no
ENSDARG00000040321	ENSDARG00000040321	rx2	chr2:56045665-56074438	0.00316978	0	#NAME?	1	no	0	0	0	1	no	0	0.00398186	inf	1	no	0	0	0	1	no	#NAME?	0	#VALUE!	0	no	no	no	no
ENSDARG00000036430	ENSDARG00000036430	sat2a	chr7:21802772-21809332	0.0306671	0	#NAME?	1	no	0.0613185	0.112435	0.874692	1	no	0.0547919	0.0385239	-0.508211	1	no	0.0829235	0	#NAME?	1	no	#NAME?	-0.874692	0.508211	#NAME?	no	no	no	no
ENSDARG00000079897	ENSDARG00000079897	SBSPON	chr6:46418399-46431061	0	0.0119839	inf	1	no	0.0147369	0.0241288	0.711329	1	no	0.013169	0	#NAME?	1	no	0.0178108	0.012253	-0.539612	1	no	#VALUE!	-0.711329	#NAME?	0.539612	no	no	no	no
ENSDARG00000078180	ENSDARG00000078180	sc:d0202	chr3:46463430-46465013	0.00835975	0	#NAME?	1	no	0.0132302	0	#NAME?	1	no	0.0118226	0.0105015	-0.17096	1	no	0	0	0	1	no	#NAME?	#NAME?	0.17096	0	no	no	no	no
ENSDARG00000040274	ENSDARG00000040274	SCAMP5 (2 of 2)	chr18:48946021-48953963	0	0.0159062	inf	1	no	0.142711	0.0722247	-0.982536	1	no	0.127524	0	#NAME?	1	no	0.0531582	0.0162212	-1.71241	1	no	#VALUE!	0.982536	#NAME?	1.71241	no	no	no	no
ENSDARG00000085825	ENSDARG00000085825	SCARNA11	chr11:5552986-5574422	0.970429	0	#NAME?	1	no	0	0	0	1	no	0	1.21905	inf	1	no	0	0	0	1	no	#NAME?	0	#VALUE!	0	no	no	no	no
ENSDARG00000085249	ENSDARG00000085249	SCARNA14	chr21:36375401-36415100	0	1.46628	inf	1	no	0	0	0	1	no	0	0	0	1	no	0	1.49532	inf	1	no	#VALUE!	0	0	#VALUE!	no	no	no	no
ENSDARG00000085501	ENSDARG00000085501	SCARNA24	chr2:8433633-8447445	0	1.14119	inf	1	no	2.83179	0	#NAME?	0.1018	no	2.53041	0	#NAME?	0.074	no	0	1.16682	inf	1	no	#VALUE!	#NAME?	#NAME?	#VALUE!	no	no	no	no
ENSDARG00000083760	ENSDARG00000083760	SCARNA6	chr15:44800380-44844611	0.715215	0	#NAME?	1	no	1.09402	1.23899	0.17952	1	no	0.977588	0.90147	-0.116947	1	no	0.912672	0	#NAME?	1	no	#NAME?	-0.17952	0.116947	#NAME?	no	no	no	no
ENSDARG00000093690	ENSDARG00000093690	scn12aa	chr2:52789627-52789894	0.253365	0	#NAME?	1	no	0.380337	0.95022	1.32098	1	no	0.339842	0.320011	-0.0867441	1	no	0.700684	0	#NAME?	1	no	#NAME?	-1.32098	0.0867441	#NAME?	no	no	no	no
ENSDARG00000096464	ENSDARG00000096464	scn1a	chr9:51188902-51191718	0.103005	0	#NAME?	1	no	0.147215	0.066275	-1.15139	1	no	0.131549	0.130169	-0.0152191	1	no	0.0487792	0	#NAME?	1	no	#NAME?	1.15139	0.0152191	#NAME?	no	no	no	no
ENSDARG00000040214	ENSDARG00000040214	scrt1b	chr16:33490255-33492888	0.0111507	0	#NAME?	1	no	0.00557961	0.0612973	3.45759	1	no	0.00498555	0.0140838	1.49822	1	no	0.0452309	0	#NAME?	1	no	#NAME?	-3.45759	-1.49822	#NAME?	no	no	no	no
ENSDARG00000095348	ENSDARG00000095348	sh2d1a	chr5:23071554-23077433	0.157266	0	#NAME?	1	no	0.227835	0.347725	0.609956	1	no	0.203583	0.199503	-0.0292117	1	no	0.256456	0	#NAME?	1	no	#NAME?	-0.609956	0.0292117	#NAME?	no	no	no	no
ENSDARG00000053739	ENSDARG00000053739	si:busm1-160c18.1	chr8:35956335-36146143	0	0.0657727	inf	1	no	0.0250414	0	#NAME?	1	no	0.0223752	0	#NAME?	1	no	0	0.0669251	inf	1	no	#VALUE!	#NAME?	#NAME?	#VALUE!	no	no	no	no
ENSDARG00000051791	ENSDARG00000051791	si:busm1-169i8.11	chr7:18573410-18577650	0	0.0294856	inf	1	no	0	0.0545851	inf	1	no	0	0	0	1	no	0.0402315	0.029897	-0.428326	1	no	#VALUE!	#VALUE!	0	0.428326	no	no	no	no
ENSDARG00000089556	ENSDARG00000089556	si:busm1-180g5.7	chr20:9932573-9941255	0.0129715	0	#NAME?	1	no	0.0619535	0.0446969	-0.471012	1	no	0.0553607	0.0162947	-1.76446	1	no	0.0329334	0	#NAME?	1	no	#NAME?	0.471012	1.76446	#NAME?	no	no	no	no
ENSDARG00000079593	ENSDARG00000079593	si:busm1-228j01.5	chr8:45768097-45769605	0.0701377	0	#NAME?	1	no	0.122394	0.127221	0.0558136	1	no	0.109367	0.0887628	-0.301143	1	no	0.0937578	0	#NAME?	1	no	#NAME?	-0.0558136	0.301143	#NAME?	no	no	no	no
ENSDARG00000091948	ENSDARG00000091948	si:ch1073-109g21.1	chr8:1716446-1816365	0.00705281	0	#NAME?	1	no	0	0	0	1	no	0	0.00887896	inf	1	no	0	0	0	1	no	#NAME?	0	#VALUE!	0	no	no	no	no
ENSDARG00000095081	ENSDARG00000095081	si:ch1073-111a5.3	chr10:8709502-8711513	0.0526046	0	#NAME?	1	no	0.0266626	0	#NAME?	1	no	0.023826	0.0661333	1.47284	1	no	0	0	0	1	no	#NAME?	#NAME?	-1.47284	0	no	no	no	no
ENSDARG00000096262	ENSDARG00000096262	si:ch1073-312b22.1	chr18:49283834-49290511	0.0210589	0	#NAME?	1	no	0.0309259	0.0910237	1.55742	1	no	0.0276332	0.0268185	-0.0431759	1	no	0.0671011	0	#NAME?	1	no	#NAME?	-1.55742	0.0431759	#NAME?	no	no	no	no
ENSDARG00000091981	ENSDARG00000091981	si:ch1073-443k13.2	chr21:38540364-38709141	0	0.0667503	inf	1	no	0.142995	0	#NAME?	1	no	0.127774	0	#NAME?	1	no	0	0.0676798	inf	1	no	#VALUE!	#NAME?	#NAME?	#VALUE!	no	no	no	no
ENSDARG00000092110	ENSDARG00000092110	si:ch1073-470i20.2	chr9:2325891-2336221	0	1.97234	inf	1	no	0	3.87838	inf	0.222	no	0	0	0	1	no	2.86244	1.99962	-0.517522	0.76945	no	#VALUE!	#VALUE!	0	0.517522	no	no	no	no
ENSDARG00000058414	ENSDARG00000058414	si:ch1073-504d15.2	chr3:2202872-2231504	0.00519848	0	#NAME?	1	no	0.000250933	5.06961e-06	-5.62929	1	no	0.000224216	0.00592687	4.72431	1	no	5.17902e-06	0	#NAME?	1	no	#NAME?	5.62929	-4.72431	#NAME?	no	no	no	no
ENSDARG00000095818	ENSDARG00000095818	si:ch1073-504d15.3	chr3:2202872-2231504	0.085472	0	#NAME?	1	no	0.0742806	0.120033	0.692378	1	no	0.0663719	0.108203	0.705093	1	no	0.0886011	0	#NAME?	1	no	#NAME?	-0.692378	-0.705093	#NAME?	no	no	no	no
ENSDARG00000092006	ENSDARG00000092006	si:ch211-100p3.1	chr8:31173943-31272224	0.591006	0	#NAME?	1	no	0.821422	0	#NAME?	1	no	0.734032	0.74242	0.0163929	1	no	0	0	0	1	no	#NAME?	#NAME?	-0.0163929	0	no	no	no	no
ENSDARG00000095800	ENSDARG00000095800	si:ch211-105n15.1	chr22:6395670-6399505	0.0373347	0	#NAME?	1	no	0.454363	0.130552	-1.79922	1	no	0.406008	0.0472376	-3.1035	1	no	0.0962852	0	#NAME?	1	no	#NAME?	1.79922	3.1035	#NAME?	no	no	no	no
ENSDARG00000095059	ENSDARG00000095059	si:ch211-106h4.5	chr2:31326755-31330113	0	0.0841087	inf	1	no	0	0.25463	inf	1	no	0	0	0	1	no	0.18741	0.0857743	-1.12758	1	no	#VALUE!	#VALUE!	0	1.12758	no	no	no	no
ENSDARG00000093807	ENSDARG00000093807	si:ch211-10j20.1	chr20:39419015-39520827	0.0180645	0	#NAME?	1	no	0.0248268	0	#NAME?	1	no	0.0221855	0.0227363	0.0353775	1	no	0	0	0	1	no	#NAME?	#NAME?	-0.0353775	0	no	no	no	no
ENSDARG00000093231	ENSDARG00000093231	si:ch211-10j20.4	chr20:39398272-39400335	0.0421812	0	#NAME?	1	no	0.0320153	0.0514977	0.685746	1	no	0.0286066	0.0530487	0.890968	1	no	0.0380132	0	#NAME?	1	no	#NAME?	-0.685746	-0.890968	#NAME?	no	no	no	no
ENSDARG00000051734	ENSDARG00000051734	si:ch211-113a14.16	chr25:37373554-37373941	0	0.0344281	inf	1	no	0.0487809	0	#NAME?	1	no	0.0435912	0	#NAME?	1	no	0	0.0349085	inf	1	no	#VALUE!	#NAME?	#NAME?	#VALUE!	no	no	no	no
ENSDARG00000070285	ENSDARG00000070285	si:ch211-113a14.21	chr25:37382501-37382813	0	0.0569675	inf	1	no	0.0807168	0	#NAME?	1	no	0.0721295	0	#NAME?	1	no	0	0.0577624	inf	1	no	#VALUE!	#NAME?	#NAME?	#VALUE!	no	no	no	no
ENSDARG00000051718	ENSDARG00000051718	si:ch211-113a14.24	chr25:37405092-37405692	0	0.0202456	inf	1	no	0.045512	0.0306428	-0.570699	1	no	0.0406682	0	#NAME?	1	no	0.0225534	0.0206465	-0.127452	1	no	#VALUE!	0.570699	#NAME?	0.127452	no	no	no	no
ENSDARG00000096050	ENSDARG00000096050	si:ch211-117l17.4	chr22:23522984-23527648	0.0361582	0	#NAME?	1	no	0.0799147	0.15086	0.916678	1	no	0.0714171	0.0454619	-0.651612	1	no	0.111267	0	#NAME?	1	no	#NAME?	-0.916678	0.651612	#NAME?	no	no	no	no
ENSDARG00000068190	ENSDARG00000068190	si:ch211-119d14.4	chr8:48211558-48218400	0.00384987	0	#NAME?	1	no	0	0	0	1	no	0	0.0048467	inf	1	no	0	0	0	1	no	#NAME?	0	#VALUE!	0	no	no	no	no
ENSDARG00000094499	ENSDARG00000094499	si:ch211-120f16.3	chr2:50769975-50795733	0	0.0805753	inf	1	no	0	0	0	1	no	0	0	0	1	no	0	0.0816995	inf	1	no	#VALUE!	0	0	#VALUE!	no	no	no	no
ENSDARG00000087004	ENSDARG00000087004	si:ch211-122l24.4	chr2:39903197-39903976	0.0346252	0	#NAME?	1	no	0.94578	0.134582	-2.81302	1	no	0.845093	0.043496	-4.28016	1	no	0.0993421	0	#NAME?	1	no	#NAME?	2.81302	4.28016	#NAME?	no	no	no	no
ENSDARG00000092090	ENSDARG00000092090	si:ch211-125e6.12	chr9:34250252-34254978	0.0116837	0	#NAME?	1	no	0	0	0	1	no	0	0.014677	inf	1	no	0	0	0	1	no	#NAME?	0	#VALUE!	0	no	no	no	no
ENSDARG00000094822	ENSDARG00000094822	si:ch211-127b6.1	chr13:48703500-48721163	0.00196916	0	#NAME?	1	no	0	0	0	1	no	0	0.0024737	inf	1	no	0	0	0	1	no	#NAME?	0	#VALUE!	0	no	no	no	no
ENSDARG00000094445	ENSDARG00000094445	si:ch211-12e1.3	chr2:21337904-21339602	0.0187722	0	#NAME?	1	no	0.014248	0.0190175	0.416566	1	no	0.012731	0.0236086	0.890968	1	no	0.0139971	0	#NAME?	1	no	#NAME?	-0.416566	-0.890968	#NAME?	no	no	no	no
ENSDARG00000092683	ENSDARG00000092683	si:ch211-12e13.11	chr5:9559884-9564024	0	0.0165017	inf	1	no	0.0233811	0.0382821	0.711329	1	no	0.0208936	0	#NAME?	1	no	0.0282581	0.0167319	-0.756061	1	no	#VALUE!	-0.711329	#NAME?	0.756061	no	no	no	no
ENSDARG00000093841	ENSDARG00000093841	si:ch211-12h2.6	chr22:25807789-25934871	0	0.0181123	inf	1	no	0	0.0907821	inf	1	no	0	0	0	1	no	0.0668168	0.0185191	-1.8512	1	no	#VALUE!	#VALUE!	0	1.8512	no	no	no	no
ENSDARG00000088923	ENSDARG00000088923	si:ch211-12h2.8	chr22:26091762-26093028	0.0320722	0	#NAME?	1	no	0	0	0	1	no	0	0.0403769	inf	1	no	0	0	0	1	no	#NAME?	0	#VALUE!	0	no	no	no	no
ENSDARG00000091361	ENSDARG00000091361	si:ch211-12n8.3	chr9:56894634-56898229	0.157937	0	#NAME?	1	no	0.162965	0.131067	-0.314254	1	no	0.145614	0.198555	0.447389	1	no	0.0967479	0	#NAME?	1	no	#NAME?	0.314254	-0.447389	#NAME?	no	no	no	no
ENSDARG00000095405	ENSDARG00000095405	si:ch211-131e11.15	chr3:4626878-5067635	0	0.412084	inf	1	no	0	0	0	1	no	0	0	0	1	no	0	0.421338	inf	1	no	#VALUE!	0	0	#VALUE!	no	no	no	no
ENSDARG00000094480	ENSDARG00000094480	si:ch211-132a5.4	chr2:10133494-10242089	0	0.0192312	inf	1	no	0.16111	0.10764	-0.581831	1	no	0.143965	0	#NAME?	1	no	0.0794572	0.0196632	-2.01468	1	no	#VALUE!	0.581831	#NAME?	2.01468	no	no	no	no
ENSDARG00000068372	ENSDARG00000068372	si:ch211-132b12.5	chr18:38914750-38935187	0	0.0231932	inf	1	no	0.0244992	0.00521278	-2.23261	1	no	0.021891	0	#NAME?	1	no	0.00383652	0.0235433	2.61745	1	no	#VALUE!	2.23261	#NAME?	-2.61745	no	no	no	no
ENSDARG00000095815	ENSDARG00000095815	si:ch211-133d10.1	chr9:9293079-9296706	0.0671392	0	#NAME?	1	no	0.106255	0	#NAME?	1	no	0.0949505	0.0843399	-0.17096	1	no	0	0	0	1	no	#NAME?	#NAME?	0.17096	0	no	no	no	no
ENSDARG00000093105	ENSDARG00000093105	si:ch211-133l5.6	chr8:21364004-21396694	0	0.0458453	inf	1	no	0.172157	0.261208	0.601473	1	no	0.153827	0	#NAME?	1	no	0.192647	0.0468748	-2.03908	1	no	#VALUE!	-0.601473	#NAME?	2.03908	no	no	no	no
ENSDARG00000063613	ENSDARG00000063613	si:ch211-133n4.10	chr19:3847504-3849922	0.0185621	0	#NAME?	1	no	0.0979015	0.0226643	-2.11091	1	no	0.0874812	0.023346	-1.9058	1	no	0.0167286	0	#NAME?	1	no	#NAME?	2.11091	1.9058	#NAME?	no	no	no	no
ENSDARG00000092142	ENSDARG00000092142	si:ch211-136a13.2	chr18:48058593-48065143	0	0.0511096	inf	1	no	0.181382	0	#NAME?	1	no	0.162075	0	#NAME?	1	no	0	0.0521861	inf	1	no	#VALUE!	#NAME?	#NAME?	#VALUE!	no	no	no	no
ENSDARG00000095199	ENSDARG00000095199	si:ch211-13o20.1	chr23:16915499-16917141	0.00747381	0	#NAME?	1	no	0.0713916	0.0354362	-1.01053	1	no	0.0637944	0.00938856	-2.76446	1	no	0.0261229	0	#NAME?	1	no	#NAME?	1.01053	2.76446	#NAME?	no	no	no	no
ENSDARG00000092443	ENSDARG00000092443	si:ch211-145g9.5	chr1:52363018-52370826	0.0741565	0	#NAME?	1	no	0.0797401	0.0728485	-0.130406	1	no	0.0712515	0.093435	0.391043	1	no	0.0537277	0	#NAME?	1	no	#NAME?	0.130406	-0.391043	#NAME?	no	no	no	no
ENSDARG00000096044	ENSDARG00000096044	si:ch211-145g9.6	chr1:52296486-52297556	0.0501664	0	#NAME?	1	no	0	0	0	1	no	0	0.0630188	inf	1	no	0	0	0	1	no	#NAME?	0	#VALUE!	0	no	no	no	no
ENSDARG00000094185	ENSDARG00000094185	si:ch211-146g19.1	chr18:3967883-3968806	0.019735	0	#NAME?	1	no	0.0624652	0.314442	2.33167	1	no	0.0558196	0.0247909	-1.17096	1	no	0.231652	0	#NAME?	1	no	#NAME?	-2.33167	1.17096	#NAME?	no	no	no	no
ENSDARG00000092924	ENSDARG00000092924	si:ch211-146l10.5	chr24:9812390-9822071	0.00452999	0	#NAME?	1	no	0	0	0	1	no	0	0.00569055	inf	1	no	0	0	0	1	no	#NAME?	0	#VALUE!	0	no	no	no	no
ENSDARG00000093216	ENSDARG00000093216	si:ch211-146l10.7	chr24:9795806-9798678	0.00674333	0	#NAME?	1	no	0	0	0	1	no	0	0.00847093	inf	1	no	6.09674e-08	0	#NAME?	1	no	#NAME?	0	#VALUE!	#NAME?	no	no	no	no
ENSDARG00000096460	ENSDARG00000096460	si:ch211-147k9.3	chr25:22435979-22438217	0.0539218	0	#NAME?	1	no	0.0386943	0	#NAME?	1	no	0.0345745	0.0678835	0.973354	1	no	0	0	0	1	no	#NAME?	#NAME?	-0.973354	0	no	no	no	no
ENSDARG00000094063	ENSDARG00000094063	si:ch211-149l1.1	chr1:50206301-50222221	0.0581738	0	#NAME?	1	no	0	0	0	1	no	0	0.0730776	inf	1	no	0	0	0	1	no	#NAME?	0	#VALUE!	0	no	no	no	no
ENSDARG00000094846	ENSDARG00000094846	si:ch211-14a11.5	chr20:52069510-52286030	0.0159705	0	#NAME?	1	no	0.0234467	0	#NAME?	1	no	0.0209503	0.0203344	-0.0430458	1	no	0	0	0	1	no	#NAME?	#NAME?	0.0430458	0	no	no	no	no
ENSDARG00000038720	ENSDARG00000038720	si:ch211-14a17.7	chr2:37985404-37987509	0.0279758	0	#NAME?	1	no	0.0225077	0.0138242	-0.703224	1	no	0.0201122	0.0356271	0.824905	1	no	0.0101682	0	#NAME?	1	no	#NAME?	0.703224	-0.824905	#NAME?	no	no	no	no
ENSDARG00000092322	ENSDARG00000092322	si:ch211-152f2.1	chr1:57393219-57395342	0.0067882	0	#NAME?	1	no	0	0	0	1	no	0	0.00854584	inf	1	no	0	0	0	1	no	#NAME?	0	#VALUE!	0	no	no	no	no
ENSDARG00000096574	ENSDARG00000096574	si:ch211-152f2.4	chr1:57479681-57482387	0	0.00949276	inf	1	no	0.0350203	0.0955652	1.44829	1	no	0.0312946	0	#NAME?	1	no	0.0705418	0.00970593	-2.86154	1	no	#VALUE!	-1.44829	#NAME?	2.86154	no	no	no	no
ENSDARG00000094519	ENSDARG00000094519	si:ch211-152p23.2	chr8:43452713-43479484	0	0.0388864	inf	1	no	0.0971239	0.0263466	-1.88221	1	no	0.0867884	0	#NAME?	1	no	0.0194478	0.0396248	1.02679	1	no	#VALUE!	1.88221	#NAME?	-1.02679	no	no	no	no
ENSDARG00000094301	ENSDARG00000094301	si:ch211-153i8.1	chr13:9729429-9867266	0.0127103	0	#NAME?	1	no	0	0	0	1	no	0	0.0159666	inf	1	no	0	0	0	1	no	#NAME?	0	#VALUE!	0	no	no	no	no
ENSDARG00000095483	ENSDARG00000095483	si:ch211-153i8.2	chr13:9898914-9912076	0.0066619	0	#NAME?	1	no	0.0105431	0	#NAME?	1	no	0.00942148	0.00836864	-0.17096	1	no	0	0	0	1	no	#NAME?	#NAME?	0.17096	0	no	no	no	no
ENSDARG00000070757	ENSDARG00000070757	si:ch211-155i14.1	chr20:10910377-10917262	0	0.00832778	inf	1	no	0.0206639	0.0417404	1.01433	1	no	0.0184647	0	#NAME?	1	no	0.0307214	0.00851479	-1.8512	1	no	#VALUE!	-1.01433	#NAME?	1.8512	no	no	no	no
ENSDARG00000095885	ENSDARG00000095885	si:ch211-158m24.12	chr5:33898116-33911998	0.034703	0	#NAME?	1	no	0	0	0	1	no	0	0.0436585	inf	1	no	0	0	0	1	no	#NAME?	0	#VALUE!	0	no	no	no	no
ENSDARG00000096412	ENSDARG00000096412	si:ch211-15j1.7	chr1:58862392-58866126	0	0.0049585	inf	1	no	0	0.0190905	inf	1	no	0	0	0	1	no	0.0140508	0.00502769	-1.48269	1	no	#VALUE!	#VALUE!	0	1.48269	no	no	no	no
ENSDARG00000096341	ENSDARG00000096341	si:ch211-15l16.3	chr6:20961047-21027648	0.0471464	0	#NAME?	1	no	0	0.092418	inf	1	no	0	0.0600413	inf	1	no	0.0680207	0	#NAME?	1	no	#NAME?	#VALUE!	#VALUE!	#NAME?	no	no	no	no
ENSDARG00000094943	ENSDARG00000094943	si:ch211-161c21.2	chr1:16929506-16979566	0	0.019824	inf	1	no	0.0781073	0	#NAME?	1	no	0.0697976	0	#NAME?	1	no	0	0.0201006	inf	1	no	#VALUE!	#NAME?	#NAME?	#VALUE!	no	no	no	no
ENSDARG00000092989	ENSDARG00000092989	si:ch211-161n3.3	chr4:10023965-10037937	0.00311732	0	#NAME?	1	no	0.00149915	0.00245458	0.711329	1	no	0.00133966	0.0039699	1.56724	1	no	0.00181186	0	#NAME?	1	no	#NAME?	-0.711329	-1.56724	#NAME?	no	no	no	no
ENSDARG00000096384	ENSDARG00000096384	si:ch211-162i14.1	chr6:11636397-11670807	0.0595333	0	#NAME?	1	no	0	0	0	1	no	0	0.0758155	inf	1	no	0	0	0	1	no	#NAME?	0	#VALUE!	0	no	no	no	no
ENSDARG00000096155	ENSDARG00000096155	si:ch211-162i8.1	chr4:50771119-50834920	7.01259e-06	0	#NAME?	1	no	0	0.00421433	inf	1	no	0	0	0	1	no	0.00319042	0	#NAME?	1	no	#NAME?	#VALUE!	0	#NAME?	no	no	no	no
ENSDARG00000096041	ENSDARG00000096041	si:ch211-162i8.2	chr4:51028906-51074606	0	0.00453269	inf	1	no	0.0449902	0.0166992	-1.42984	1	no	0.0402019	0	#NAME?	1	no	0.0123103	0.00463448	-1.40939	1	no	#VALUE!	1.42984	#NAME?	1.40939	no	no	no	no
ENSDARG00000091524	ENSDARG00000091524	si:ch211-162i8.3	chr4:51028906-51074606	0	0.00629435	inf	1	no	0.00742414	0.00499854	-0.570715	1	no	0.00663399	0	#NAME?	1	no	0.00367899	0.00642694	0.804823	1	no	#VALUE!	0.570715	#NAME?	-0.804823	no	no	no	no
ENSDARG00000095855	ENSDARG00000095855	si:ch211-163l21.11	chr8:24598109-24604839	0.00895699	0	#NAME?	1	no	0.0141754	0.0656779	2.21202	1	no	0.0126673	0.0112517	-0.17096	1	no	0.0484392	0	#NAME?	1	no	#NAME?	-2.21202	0.17096	#NAME?	no	no	no	no
ENSDARG00000090099	ENSDARG00000090099	si:ch211-165f21.6	chr7:6373981-6391465	0.00794649	0	#NAME?	1	no	0	0	0	1	no	0	0.010004	inf	1	no	0	0	0	1	no	#NAME?	0	#VALUE!	0	no	no	no	no
ENSDARG00000094509	ENSDARG00000094509	si:ch211-16k18.1	chr2:39631156-39730818	0	0.0739387	inf	1	no	0.0136134	0	#NAME?	1	no	0.0121651	0	#NAME?	1	no	0	0.0752301	inf	1	no	#VALUE!	#NAME?	#NAME?	#VALUE!	no	no	no	no
ENSDARG00000092820	ENSDARG00000092820	si:ch211-173b8.3	chr19:30247835-30259809	1.66304e-05	0	#NAME?	1	no	0	0	0	1	no	0	1.69623e-05	inf	1	no	0	0	0	1	no	#NAME?	0	#VALUE!	0	no	no	no	no
ENSDARG00000096400	ENSDARG00000096400	si:ch211-173b9.5	chr20:16760232-16761740	0.0247482	0	#NAME?	1	no	0	0	0	1	no	0	0.0311562	inf	1	no	0	0	0	1	no	#NAME?	0	#VALUE!	0	no	no	no	no
ENSDARG00000093284	ENSDARG00000093284	si:ch211-173m16.2	chr9:3033635-3035823	0.0274279	0	#NAME?	1	no	0.117402	0	#NAME?	1	no	0.104905	0.0345297	-1.60318	1	no	0	0	0	1	no	#NAME?	#NAME?	1.60318	0	no	no	no	no
ENSDARG00000093015	ENSDARG00000093015	si:ch211-174j14.2	chr18:28318629-28320481	0.00824974	0	#NAME?	1	no	0	0	0	1	no	0	0.0103633	inf	1	no	0	0	0	1	no	#NAME?	0	#VALUE!	0	no	no	no	no
ENSDARG00000096024	ENSDARG00000096024	si:ch211-178j18.4	chr4:55986431-55990645	0.00874272	0	#NAME?	1	no	0	0	0	1	no	0	0.0111338	inf	1	no	0	0	0	1	no	#NAME?	0	#VALUE!	0	no	no	no	no
ENSDARG00000058906	ENSDARG00000058906	si:ch211-181l5.2	chr6:7157217-7162031	0.154255	0	#NAME?	1	no	0.324165	0.159112	-1.02668	1	no	0.289663	0.194706	-0.573077	1	no	0.117364	0	#NAME?	1	no	#NAME?	1.02668	0.573077	#NAME?	no	no	no	no
ENSDARG00000094248	ENSDARG00000094248	si:ch211-188c16.4	chr2:2542617-2589180	0	0.0173902	inf	1	no	0.0387466	0.0263211	-0.557851	1	no	0.0346245	0	#NAME?	1	no	0.0193726	0.0177346	-0.127452	1	no	#VALUE!	0.557851	#NAME?	0.127452	no	no	no	no
ENSDARG00000095756	ENSDARG00000095756	si:ch211-190k17.19	chr2:50369707-50371249	0.00592082	0	#NAME?	1	no	0.0381518	0	#NAME?	1	no	0.0340897	0.0074377	-2.19641	1	no	0	0	0	1	no	#NAME?	#NAME?	2.19641	0	no	no	no	no
ENSDARG00000093735	ENSDARG00000093735	si:ch211-190o19.1	chr24:16438500-16442532	0.00637403	0	#NAME?	1	no	0.00936053	0	#NAME?	1	no	0.00836391	0.00811731	-0.0431759	1	no	0	0	0	1	no	#NAME?	#NAME?	0.0431759	0	no	no	no	no
ENSDARG00000092834	ENSDARG00000092834	si:ch211-191d15.2	chr5:22224980-22225642	0	0.0137627	inf	1	no	0.0198491	0	#NAME?	1	no	0.0177358	0	#NAME?	1	no	0	0.0139547	inf	1	no	#VALUE!	#NAME?	#NAME?	#VALUE!	no	no	no	no
ENSDARG00000093331	ENSDARG00000093331	si:ch211-192f15.3	chr16:29573621-29597577	0.0171027	0	#NAME?	1	no	0.0826529	0	#NAME?	1	no	0.0738528	0.0214843	-1.78137	1	no	0	0	0	1	no	#NAME?	#NAME?	1.78137	0	no	no	no	no
ENSDARG00000095682	ENSDARG00000095682	si:ch211-194e1.8	chr8:51619587-51660314	0	0.0291041	inf	1	no	0	0	0	1	no	0	0	0	1	no	0	0.0297173	inf	1	no	#VALUE!	0	0	#VALUE!	no	no	no	no
ENSDARG00000092729	ENSDARG00000092729	si:ch211-194h1.1	chr4:48489977-48494616	0	0.00540691	inf	1	no	0.0134169	0	#NAME?	1	no	0.0119889	0	#NAME?	1	no	0	0.00552832	inf	1	no	#VALUE!	#NAME?	#NAME?	#VALUE!	no	no	no	no
ENSDARG00000093561	ENSDARG00000093561	si:ch211-195o19.4	chr20:15897504-15962901	0.023812	0	#NAME?	1	no	0.0170887	0	#NAME?	1	no	0.0152693	0.0299776	0.973254	1	no	0	0	0	1	no	#NAME?	#NAME?	-0.973254	0	no	no	no	no
ENSDARG00000095734	ENSDARG00000095734	si:ch211-196g2.8	chr8:48706640-48709024	0	0.00603099	inf	1	no	0.0173963	0	#NAME?	1	no	0.0155441	0	#NAME?	1	no	0	0.00611514	inf	1	no	#VALUE!	#NAME?	#NAME?	#VALUE!	no	no	no	no
ENSDARG00000095044	ENSDARG00000095044	si:ch211-196n4.2	chr19:24253787-24255508	0.0269517	0	#NAME?	1	no	0.0255608	0	#NAME?	1	no	0.0228404	0.0339302	0.570985	1	no	0	0	0	1	no	#NAME?	#NAME?	-0.570985	0	no	no	no	no
ENSDARG00000096215	ENSDARG00000096215	si:ch211-197e10.1	chr4:52286469-52288965	0.017001	0	#NAME?	1	no	0	0	0	1	no	0	0.0215104	inf	1	no	0	0	0	1	no	#NAME?	0	#VALUE!	0	no	no	no	no
ENSDARG00000096014	ENSDARG00000096014	si:ch211-197e10.2	chr4:52159767-52163468	0	0.0944249	inf	1	no	0	0	0	1	no	0	0	0	1	no	0	0.0962948	inf	1	no	#VALUE!	0	0	#VALUE!	no	no	no	no
ENSDARG00000094419	ENSDARG00000094419	si:ch211-198b21.6	chr9:43783675-43784299	0.0212195	0	#NAME?	1	no	0	0	0	1	no	0	0.0266558	inf	1	no	0	0	0	1	no	#NAME?	0	#VALUE!	0	no	no	no	no
ENSDARG00000094622	ENSDARG00000094622	si:ch211-198e13.3	chr5:54831206-54834091	0.0327367	0	#NAME?	1	no	0	0.205139	inf	1	no	0	0.041213	inf	1	no	0.151066	0	#NAME?	1	no	#NAME?	#VALUE!	#VALUE!	#NAME?	no	no	no	no
ENSDARG00000096643	ENSDARG00000096643	si:ch211-198k9.11	chr1:28212405-28321676	0	0.0177759	inf	1	no	0	0	0	1	no	0	0	0	1	no	0	0.0181279	inf	1	no	#VALUE!	0	0	#VALUE!	no	no	no	no
ENSDARG00000068098	ENSDARG00000068098	si:ch211-198o12.4	chr8:53619723-53627543	0.0222724	0	#NAME?	1	no	0	0	0	1	no	0	0.0282768	inf	1	no	0	0	0	1	no	#NAME?	0	#VALUE!	0	no	no	no	no
ENSDARG00000092096	ENSDARG00000092096	si:ch211-199i18.9	chr10:6899126-6921184	0.0111119	0	#NAME?	1	no	0.0164136	0	#NAME?	1	no	0.014666	0.014151	-0.0515749	1	no	0	0	0	1	no	#NAME?	#NAME?	0.0515749	0	no	no	no	no
ENSDARG00000096619	ENSDARG00000096619	si:ch211-1f22.10	chr1:57505157-57509810	0.00630301	0	#NAME?	1	no	0.0185125	0.014889	-0.314254	1	no	0.0165414	0.00802687	-1.04318	1	no	0.0109903	0	#NAME?	1	no	#NAME?	0.314254	1.04318	#NAME?	no	no	no	no
ENSDARG00000093845	ENSDARG00000093845	si:ch211-1f22.12	chr1:57542070-57547466	0.0116642	0	#NAME?	1	no	0	0	0	1	no	0	0.0147593	inf	1	no	0	0	0	1	no	#NAME?	0	#VALUE!	0	no	no	no	no
ENSDARG00000096607	ENSDARG00000096607	si:ch211-1f22.17	chr1:57563448-57566589	0	0.0146719	inf	1	no	0.0180423	0	#NAME?	1	no	0.0161228	0	#NAME?	1	no	0	0.0150014	inf	1	no	#VALUE!	#NAME?	#NAME?	#VALUE!	no	no	no	no
ENSDARG00000094391	ENSDARG00000094391	si:ch211-1f22.3	chr1:57351543-57355160	0.00810716	0	#NAME?	1	no	0.0489789	0	#NAME?	1	no	0.0437654	0.0101842	-2.10346	1	no	0	0	0	1	no	#NAME?	#NAME?	2.10346	0	no	no	no	no
ENSDARG00000096621	ENSDARG00000096621	si:ch211-1f22.4	chr1:57363653-57366504	0	0.00790792	inf	1	no	0.0226098	0	#NAME?	1	no	0.0202034	0	#NAME?	1	no	0	0.00801826	inf	1	no	#VALUE!	#NAME?	#NAME?	#VALUE!	no	no	no	no
ENSDARG00000096543	ENSDARG00000096543	si:ch211-1f22.7	chr1:57409553-57414062	0	0.00818525	inf	1	no	0.0234027	0	#NAME?	1	no	0.020912	0	#NAME?	1	no	0	0.00829946	inf	1	no	#VALUE!	#NAME?	#NAME?	#VALUE!	no	no	no	no
ENSDARG00000096507	ENSDARG00000096507	si:ch211-1f22.8	chr1:57436022-57441567	0.00794758	0	#NAME?	1	no	1.65695	1.4924	-0.150896	1	no	1.48057	0.00998371	-7.21236	1	no	1.10129	0	#NAME?	1	no	#NAME?	0.150896	7.21236	#NAME?	no	no	no	no
ENSDARG00000096585	ENSDARG00000096585	si:ch211-1f22.9	chr1:57469550-57471969	0.0115921	0	#NAME?	1	no	0	0	0	1	no	0	0.0147625	inf	1	no	0	0	0	1	no	#NAME?	0	#VALUE!	0	no	no	no	no
ENSDARG00000042339	ENSDARG00000042339	si:ch211-207b24.4	chr3:49366774-49375452	0	0.00683633	inf	1	no	0	0.0115862	inf	1	no	0	0	0	1	no	0.00852742	0.00695411	-0.294243	1	no	#VALUE!	#VALUE!	0	0.294243	no	no	no	no
ENSDARG00000092299	ENSDARG00000092299	si:ch211-207l22.2	chr16:37988118-37990418	0	0.0447569	inf	1	no	0.0507528	0.0816375	0.685746	1	no	0.0453491	0	#NAME?	1	no	0.060261	0.0456432	-0.400825	1	no	#VALUE!	-0.685746	#NAME?	0.400825	no	no	no	no
ENSDARG00000094212	ENSDARG00000094212	si:ch211-208f21.4	chr4:54061581-54100085	0	0.027768	inf	1	no	0.0196721	0	#NAME?	1	no	0.0175792	0	#NAME?	1	no	0	0.0281554	inf	1	no	#VALUE!	#NAME?	#NAME?	#VALUE!	no	no	no	no
ENSDARG00000092173	ENSDARG00000092173	si:ch211-208n2.2	chr1:23725916-23941964	0.038153	0	#NAME?	1	no	0	0.0414908	inf	1	no	0	0.0480321	inf	1	no	0.0305378	0	#NAME?	1	no	#NAME?	#VALUE!	#VALUE!	#NAME?	no	no	no	no
ENSDARG00000093734	ENSDARG00000093734	si:ch211-209a2.2	chr5:64399399-64411678	0	0.00939735	inf	1	no	0	0	0	1	no	0	0	0	1	no	0	0.00958344	inf	1	no	#VALUE!	0	0	#VALUE!	no	no	no	no
ENSDARG00000095607	ENSDARG00000095607	si:ch211-209f23.3	chr2:50092415-50173919	0.0144301	0	#NAME?	1	no	0	0	0	1	no	0	0.0183767	inf	1	no	0	0	0	1	no	#NAME?	0	#VALUE!	0	no	no	no	no
ENSDARG00000096431	ENSDARG00000096431	si:ch211-209j12.1	chr4:33761625-33789292	0.00949995	0	#NAME?	1	no	0	0	0	1	no	0	0.0119338	inf	1	no	0	0	0	1	no	#NAME?	0	#VALUE!	0	no	no	no	no
ENSDARG00000095952	ENSDARG00000095952	si:ch211-209l18.3	chr22:6428571-6444572	0.147156	0	#NAME?	1	no	0.414806	0.326433	-0.345647	1	no	0.370676	0.185258	-1.00062	1	no	0.240958	0	#NAME?	1	no	#NAME?	0.345647	1.00062	#NAME?	no	no	no	no
ENSDARG00000088888	ENSDARG00000088888	si:ch211-209n20.58	chr4:36646546-36858020	0	0.0164939	inf	1	no	0.0542556	0.100739	0.892786	1	no	0.0484822	0	#NAME?	1	no	0.0742269	0.0168402	-2.14003	1	no	#VALUE!	-0.892786	#NAME?	2.14003	no	no	no	no
ENSDARG00000087765	ENSDARG00000087765	si:ch211-212n6.17	chr9:23343182-23344647	0	0.0261562	inf	1	no	0	0	0	1	no	0	0	0	1	no	0	0.0265211	inf	1	no	#VALUE!	0	0	#VALUE!	no	no	no	no
ENSDARG00000086917	ENSDARG00000086917	si:ch211-212n6.18	chr9:23350823-23351856	0	0.0392771	inf	1	no	0	0	0	1	no	0	0	0	1	no	0	0.0398251	inf	1	no	#VALUE!	0	0	#VALUE!	no	no	no	no
ENSDARG00000094053	ENSDARG00000094053	si:ch211-212o2.16	chr9:18779733-18833263	0	0.0721601	inf	1	no	0.0903242	0	#NAME?	1	no	0.0807073	0	#NAME?	1	no	0	0.0737805	inf	1	no	#VALUE!	#NAME?	#NAME?	#VALUE!	no	no	no	no
ENSDARG00000070741	ENSDARG00000070741	si:ch211-214c11.9	chr19:24034685-24037730	0.0186867	0	#NAME?	1	no	0	0	0	1	no	0	0.0235251	inf	1	no	0	0	0	1	no	#NAME?	0	#VALUE!	0	no	no	no	no
ENSDARG00000095320	ENSDARG00000095320	si:ch211-215e19.4	chr2:52142207-52144286	0	0.0263183	inf	1	no	0.0189787	0	#NAME?	1	no	0.016958	0	#NAME?	1	no	0	0.0266855	inf	1	no	#VALUE!	#NAME?	#NAME?	#VALUE!	no	no	no	no
ENSDARG00000091949	ENSDARG00000091949	si:ch211-215e19.6	chr2:52158709-52160911	0.0183842	0	#NAME?	1	no	0	0	0	1	no	0	0.0230941	inf	1	no	0	0	0	1	no	#NAME?	0	#VALUE!	0	no	no	no	no
ENSDARG00000079270	ENSDARG00000079270	si:ch211-215e19.7	chr2:52196882-52197526	0.0512278	0	#NAME?	1	no	0.130753	0.0425124	-1.62089	1	no	0.116838	0.0644024	-0.859324	1	no	0.0313807	0	#NAME?	1	no	#NAME?	1.62089	0.859324	#NAME?	no	no	no	no
ENSDARG00000096552	ENSDARG00000096552	si:ch211-215l11.8	chr12:6878694-7176794	0.01891	0	#NAME?	1	no	0.187115	0.159765	-0.227975	1	no	0.167206	0.0238063	-2.81222	1	no	0.117777	0	#NAME?	1	no	#NAME?	0.227975	2.81222	#NAME?	no	no	no	no
ENSDARG00000093505	ENSDARG00000093505	si:ch211-215m21.31	chr20:42863313-42866403	0.0146004	0	#NAME?	1	no	0	0	0	1	no	0	0.0185935	inf	1	no	0	0	0	1	no	#NAME?	0	#VALUE!	0	no	no	no	no
ENSDARG00000092905	ENSDARG00000092905	si:ch211-220g18.3	chr25:24774386-24775566	0.0335413	0	#NAME?	1	no	0	0	0	1	no	0	0.0421344	inf	1	no	0	0	0	1	no	#NAME?	0	#VALUE!	0	no	no	no	no
ENSDARG00000096293	ENSDARG00000096293	si:ch211-220l16.2	chr18:17823658-17908866	0.0107467	0	#NAME?	1	no	0	0	0	1	no	0	0.0136859	inf	1	no	0	0	0	1	no	#NAME?	0	#VALUE!	0	no	no	no	no
ENSDARG00000094883	ENSDARG00000094883	si:ch211-222d3.4	chr3:16520223-16523261	0.0199175	0	#NAME?	1	no	0	0.0229905	inf	1	no	0	0.0250747	inf	1	no	0.0169705	0	#NAME?	1	no	#NAME?	#VALUE!	#VALUE!	#NAME?	no	no	no	no
ENSDARG00000058477	ENSDARG00000058477	si:ch211-222n4.5	chr21:17785615-17787319	0	0.012793	inf	1	no	0	0	0	1	no	0	0	0	1	no	0	0.0130464	inf	1	no	#VALUE!	0	0	#VALUE!	no	no	no	no
ENSDARG00000095547	ENSDARG00000095547	si:ch211-223a10.3	chr13:31322376-31367135	0	0.0313128	inf	1	no	0	0	0	1	no	0	0	0	1	no	0	0.032016	inf	1	no	#VALUE!	0	0	#VALUE!	no	no	no	no
ENSDARG00000076670	ENSDARG00000076670	si:ch211-223a21.5	chr4:48033292-48051984	0.0167139	0	#NAME?	1	no	0	0	0	1	no	0	0.0210416	inf	1	no	0	0	0	1	no	#NAME?	0	#VALUE!	0	no	no	no	no
ENSDARG00000017188	ENSDARG00000017188	si:ch211-223m11.2	chr20:14012843-14028925	0	0.00286665	inf	1	no	0	0.00522883	inf	1	no	0	0	0	1	no	0.00385968	0.00292342	-0.400825	1	no	#VALUE!	#VALUE!	0	0.400825	no	no	no	no
ENSDARG00000092639	ENSDARG00000092639	si:ch211-223o1.8p	chr18:18501389-18507743	0.0218778	0	#NAME?	1	no	0	0	0	1	no	0	0.0278613	inf	1	no	0	0	0	1	no	#NAME?	0	#VALUE!	0	no	no	no	no
ENSDARG00000092650	ENSDARG00000092650	si:ch211-223p8.8	chr13:25053885-25061867	0	0.0224591	inf	1	no	0.0250078	0	#NAME?	1	no	0.0223473	0	#NAME?	1	no	0	0.0229038	inf	1	no	#VALUE!	#NAME?	#NAME?	#VALUE!	no	no	no	no
ENSDARG00000093422	ENSDARG00000093422	si:ch211-229b6.1	chr19:49028483-49077894	0	0.0333923	inf	1	no	0.0205316	0	#NAME?	1	no	0.0183473	0	#NAME?	1	no	0	0.0341422	inf	1	no	#VALUE!	#NAME?	#NAME?	#VALUE!	no	no	no	no
ENSDARG00000094482	ENSDARG00000094482	si:ch211-229l10.9	chr4:37905141-37919770	0.00783712	0	#NAME?	1	no	0.0118155	0.0371589	1.65302	1	no	0.010558	0.00984495	-0.100883	1	no	0.0273928	0	#NAME?	1	no	#NAME?	-1.65302	0.100883	#NAME?	no	no	no	no
ENSDARG00000094773	ENSDARG00000094773	si:ch211-229n2.8	chr8:14609744-14611467	0.0222715	0	#NAME?	1	no	0	0	0	1	no	0	0.0283627	inf	1	no	0	0	0	1	no	#NAME?	0	#VALUE!	0	no	no	no	no
ENSDARG00000096295	ENSDARG00000096295	si:ch211-229o8.4	chr3:30468971-30497908	0	0.0277444	inf	1	no	0.0309082	0.0419927	0.442149	1	no	0.02762	0	#NAME?	1	no	0.0309071	0.0282938	-0.127452	1	no	#VALUE!	-0.442149	#NAME?	0.127452	no	no	no	no
ENSDARG00000096197	ENSDARG00000096197	si:ch211-22k7.1	chr4:32865019-33007129	0.00435031	0	#NAME?	1	no	0	0	0	1	no	0	0.00546483	inf	1	no	0	0	0	1	no	#NAME?	0	#VALUE!	0	no	no	no	no
ENSDARG00000095092	ENSDARG00000095092	si:ch211-232m8.3	chr14:35641108-35643512	0.0994672	0	#NAME?	1	no	0.117369	0.173908	0.567266	1	no	0.104876	0.12585	0.263023	1	no	0.128262	0	#NAME?	1	no	#NAME?	-0.567266	-0.263023	#NAME?	no	no	no	no
ENSDARG00000074134	ENSDARG00000074134	si:ch211-233g6.3	chr1:59319483-59324969	0.00611767	0	#NAME?	1	no	0.0158394	0.0255187	0.68804	1	no	0.014153	0.00779084	-0.861254	1	no	0.0188368	0	#NAME?	1	no	#NAME?	-0.68804	0.861254	#NAME?	no	no	no	no
ENSDARG00000086422	ENSDARG00000086422	si:ch211-233g6.7	chr1:59372941-59384425	0	0.00774676	inf	1	no	0.00365637	0	#NAME?	1	no	0.00326738	0	#NAME?	1	no	0	0.00786996	inf	1	no	#VALUE!	#NAME?	#NAME?	#VALUE!	no	no	no	no
ENSDARG00000094440	ENSDARG00000094440	si:ch211-237c9.3	chr4:45626740-45633778	0	0.0123918	inf	1	no	0.069585	0.0617155	-0.173143	1	no	0.0621788	0	#NAME?	1	no	0.0455556	0.0126699	-1.84622	1	no	#VALUE!	0.173143	#NAME?	1.84622	no	no	no	no
ENSDARG00000092981	ENSDARG00000092981	si:ch211-238e22.1	chr4:58097899-58103344	0	0.0263792	inf	1	no	0	0	0	1	no	0	0	0	1	no	0	0.0269715	inf	1	no	#VALUE!	0	0	#VALUE!	no	no	no	no
ENSDARG00000095589	ENSDARG00000095589	si:ch211-239m17.2	chr22:4339289-4410265	0.0221262	0	#NAME?	1	no	0	0	0	1	no	0	0.0279025	inf	1	no	0	0	0	1	no	#NAME?	0	#VALUE!	0	no	no	no	no
ENSDARG00000068279	ENSDARG00000068279	si:ch211-240b21.2	chr5:22475800-22479231	0.0101494	0	#NAME?	1	no	0	0	0	1	no	0	0.0127496	inf	1	no	0	0	0	1	no	#NAME?	0	#VALUE!	0	no	no	no	no
ENSDARG00000093726	ENSDARG00000093726	si:ch211-240j18.2	chr5:13366391-13374071	0.0296057	0	#NAME?	1	no	0	0.0683467	inf	1	no	0	0.0372714	inf	1	no	0.0504504	0	#NAME?	1	no	#NAME?	#VALUE!	#VALUE!	#NAME?	no	no	no	no
ENSDARG00000094367	ENSDARG00000094367	si:ch211-241e1.4	chr2:1119722-1169253	0.0143943	0	#NAME?	1	no	0	0.0327825	inf	1	no	0	0.0181216	inf	1	no	0.0241286	0	#NAME?	1	no	#NAME?	#VALUE!	#VALUE!	#NAME?	no	no	no	no
ENSDARG00000094599	ENSDARG00000094599	si:ch211-242l1.1	chr22:17057730-17274353	0.01717	0	#NAME?	1	no	0.0467605	0.0635438	0.442462	1	no	0.0417857	0.021719	-0.944052	1	no	0.0467745	0	#NAME?	1	no	#NAME?	-0.442462	0.944052	#NAME?	no	no	no	no
ENSDARG00000092826	ENSDARG00000092826	si:ch211-243g18.3	chr10:9625099-9628820	0.0117906	0	#NAME?	1	no	0	0.0278519	inf	1	no	0	0.0150154	inf	1	no	0.020559	0	#NAME?	1	no	#NAME?	#VALUE!	#VALUE!	#NAME?	no	no	no	no
ENSDARG00000093786	ENSDARG00000093786	si:ch211-245l1.1	chr9:2221556-2325878	0.010181	0	#NAME?	1	no	0	0	0	1	no	0	0.0129654	inf	1	no	0	0	0	1	no	#NAME?	0	#VALUE!	0	no	no	no	no
ENSDARG00000094970	ENSDARG00000094970	si:ch211-245l1.2	chr9:2221556-2325878	0	0.00727776	inf	1	no	0	0	0	1	no	0	0	0	1	no	0	0.0073793	inf	1	no	#VALUE!	0	0	#VALUE!	no	no	no	no
ENSDARG00000094902	ENSDARG00000094902	si:ch211-245n8.2	chr4:53731910-53752665	0	0.0141885	inf	1	no	0.0186821	0.0181357	-0.0428261	1	no	0.0166946	0	#NAME?	1	no	0.0133481	0.014451	0.11454	1	no	#VALUE!	0.0428261	#NAME?	-0.11454	no	no	no	no
ENSDARG00000078457	ENSDARG00000078457	si:ch211-250e5.16	chr22:26304043-26305320	0.0257075	0	#NAME?	1	no	0	0	0	1	no	0	0.0325309	inf	1	no	0	0	0	1	no	#NAME?	0	#VALUE!	0	no	no	no	no
ENSDARG00000096274	ENSDARG00000096274	si:ch211-251g8.5	chr19:3458716-3480658	0	0.0204016	inf	1	no	0	0	0	1	no	0	0	0	1	no	0	0.0206863	inf	1	no	#VALUE!	0	0	#VALUE!	no	no	no	no
ENSDARG00000093641	ENSDARG00000093641	si:ch211-254n4.4	chr8:28408256-28477272	0	0.0201198	inf	1	no	0	0	0	1	no	0	0	0	1	no	0	0.0205716	inf	1	no	#VALUE!	0	0	#VALUE!	no	no	no	no
ENSDARG00000093251	ENSDARG00000093251	si:ch211-255d18.2	chr11:6767963-6876042	0	0.0630053	inf	1	no	0	0.126857	inf	1	no	0	0	0	1	no	0.0936399	0.0644202	-0.539612	1	no	#VALUE!	#VALUE!	0	0.539612	no	no	no	no
ENSDARG00000093510	ENSDARG00000093510	si:ch211-255f4.12	chr22:2780436-2781036	0	0.860286	inf	1	no	0	0	0	1	no	0	0	0	1	no	0	0.879605	inf	1	no	#VALUE!	0	0	#VALUE!	no	no	no	no
ENSDARG00000090097	ENSDARG00000090097	si:ch211-255i3.5	chr16:37099269-37106083	0	0.00587217	inf	1	no	0	0.010711	inf	1	no	0	0	0	1	no	0.00790634	0.00598846	-0.400825	1	no	#VALUE!	#VALUE!	0	0.400825	no	no	no	no
ENSDARG00000092490	ENSDARG00000092490	si:ch211-260b17.5	chr9:26112553-26113650	0.257053	0	#NAME?	1	no	0	0	0	1	no	0	0.325963	inf	1	no	0	0	0	1	no	#NAME?	0	#VALUE!	0	no	no	no	no
ENSDARG00000095905	ENSDARG00000095905	si:ch211-262h13.6	chr22:41849591-41850737	0	0.0215899	inf	1	no	0	0	0	1	no	0	0	0	1	no	0	0.0218911	inf	1	no	#VALUE!	0	0	#VALUE!	no	no	no	no
ENSDARG00000094211	ENSDARG00000094211	si:ch211-263p13.6	chr10:27398362-27428733	0.191364	0	#NAME?	1	no	0.274646	0.366614	0.416689	1	no	0.245404	0.240913	-0.0266461	1	no	0.269842	0	#NAME?	1	no	#NAME?	-0.416689	0.0266461	#NAME?	no	no	no	no
ENSDARG00000092388	ENSDARG00000092388	si:ch211-264f5.5	chr19:6332739-6334912	0.0178754	0	#NAME?	1	no	0.120676	0.116083	-0.0559748	1	no	0.107834	0.0224809	-2.26204	1	no	0.0855321	0	#NAME?	1	no	#NAME?	0.0559748	2.26204	#NAME?	no	no	no	no
ENSDARG00000076512	ENSDARG00000076512	si:ch211-265g22.4	chr2:44427192-44432915	0.0513736	0	#NAME?	1	no	0	0.0201215	inf	1	no	0	0.06465	inf	1	no	0.0148097	0	#NAME?	1	no	#NAME?	#VALUE!	#VALUE!	#NAME?	no	no	no	no
ENSDARG00000092078	ENSDARG00000092078	si:ch211-267e7.22	chr2:20468898-20473941	0.0206335	0	#NAME?	1	no	0.0148843	0	#NAME?	1	no	0.0133008	0.0262767	0.982273	1	no	0	0	0	1	no	#NAME?	#NAME?	-0.982273	0	no	no	no	no
ENSDARG00000093646	ENSDARG00000093646	si:ch211-270n8.3	chr13:20013825-20482250	0.0322631	0	#NAME?	1	no	0.0225589	0	#NAME?	1	no	0.020157	0.0408375	1.01861	1	no	0	0	0	1	no	#NAME?	#NAME?	-1.01861	0	no	no	no	no
ENSDARG00000094423	ENSDARG00000094423	si:ch211-270n8.4	chr13:20013825-20482250	0.00778312	0	#NAME?	1	no	0	0	0	1	no	0	0.00978267	inf	1	no	0	0	0	1	no	#NAME?	0	#VALUE!	0	no	no	no	no
ENSDARG00000053114	ENSDARG00000053114	si:ch211-272h9.3	chr7:5178970-5184300	0.0234156	0	#NAME?	1	no	0.0100643	0	#NAME?	1	no	0.00899276	0.0294139	1.70966	1	no	0	0	0	1	no	#NAME?	#NAME?	-1.70966	0	no	no	no	no
ENSDARG00000092167	ENSDARG00000092167	si:ch211-272h9.5	chr7:5308929-5320049	0.0265113	0	#NAME?	1	no	0.038933	0.0259828	-0.583434	1	no	0.0347878	0.0337621	-0.0431759	1	no	0.0191237	0	#NAME?	1	no	#NAME?	0.583434	0.0431759	#NAME?	no	no	no	no
ENSDARG00000093776	ENSDARG00000093776	si:ch211-272h9.6	chr7:5223996-5242619	0.0667362	0	#NAME?	1	no	0	0	0	1	no	0	0.0837541	inf	1	no	1.37143e-05	0	#NAME?	1	no	#NAME?	0	#VALUE!	#NAME?	no	no	no	no
ENSDARG00000096398	ENSDARG00000096398	si:ch211-276a17.5	chr6:9453094-9456903	0.0100651	0	#NAME?	1	no	0	0	0	1	no	0	0.0128178	inf	1	no	0	0	0	1	no	#NAME?	0	#VALUE!	0	no	no	no	no
ENSDARG00000094189	ENSDARG00000094189	si:ch211-276k2.3	chr22:38330211-38331505	0.0277668	0	#NAME?	1	no	0.04006	0.0655906	0.711329	1	no	0.0357981	0.0353609	-0.0177271	1	no	0.048416	0	#NAME?	1	no	#NAME?	-0.711329	0.0177271	#NAME?	no	no	no	no
ENSDARG00000095476	ENSDARG00000095476	si:ch211-277g23.4	chr9:32109363-32199710	0.00938326	0	#NAME?	1	no	0	0	0	1	no	0	0.0118128	inf	1	no	0	0	0	1	no	#NAME?	0	#VALUE!	0	no	no	no	no
ENSDARG00000095838	ENSDARG00000095838	si:ch211-278b7.8	chr9:49882759-49912261	0	0.0710793	inf	1	no	0.0596666	0.0934994	0.648033	1	no	0.0533164	0	#NAME?	1	no	0.0690335	0.0723659	0.0680126	1	no	#VALUE!	-0.648033	#NAME?	-0.0680126	no	no	no	no
ENSDARG00000042752	ENSDARG00000042752	si:ch211-282j17.11	chr7:3929312-3936486	0.00653599	0	#NAME?	1	no	0	0.0266334	inf	1	no	0	0.00832357	inf	1	no	0.0196592	0	#NAME?	1	no	#NAME?	#VALUE!	#VALUE!	#NAME?	no	no	no	no
ENSDARG00000093391	ENSDARG00000093391	si:ch211-282j17.7	chr7:3872296-3881155	0	0.0108297	inf	1	no	0	0	0	1	no	0	0	0	1	no	0	0.0109808	inf	1	no	#VALUE!	0	0	#VALUE!	no	no	no	no
ENSDARG00000043736	ENSDARG00000043736	si:ch211-282j17.8	chr7:3890762-3895359	0.0263717	0	#NAME?	1	no	0.0904203	0.0502305	-0.848082	1	no	0.0807982	0.033148	-1.2854	1	no	0.0370888	0	#NAME?	1	no	#NAME?	0.848082	1.2854	#NAME?	no	no	no	no
ENSDARG00000046092	ENSDARG00000046092	si:ch211-283g2.3	chr5:4242808-4252482	0.0741432	0	#NAME?	1	no	0.0139887	0	#NAME?	1	no	0.0124994	0.0934176	2.90184	1	no	0	0	0	1	no	#NAME?	#NAME?	-2.90184	0	no	no	no	no
ENSDARG00000086289	ENSDARG00000086289	si:ch211-283l16.1	chr4:48477842-48483909	0	0.00828969	inf	1	no	0.0158981	0	#NAME?	1	no	0.0142067	0	#NAME?	1	no	0	0.00847584	inf	1	no	#VALUE!	#NAME?	#NAME?	#VALUE!	no	no	no	no
ENSDARG00000092736	ENSDARG00000092736	si:ch211-284a16.4	chr20:48900078-48965987	0.00883004	0	#NAME?	1	no	0	0	0	1	no	0	0.011245	inf	1	no	0	0	0	1	no	#NAME?	0	#VALUE!	0	no	no	no	no
ENSDARG00000094545	ENSDARG00000094545	si:ch211-284f7.1	chr4:10350452-10354307	0.00792525	0	#NAME?	1	no	0.0127669	0	#NAME?	1	no	0.0114076	0.00995566	-0.196409	1	no	0	0	0	1	no	#NAME?	#NAME?	0.196409	0	no	no	no	no
ENSDARG00000092453	ENSDARG00000092453	si:ch211-285d14.5	chr4:15107630-15112168	0.113901	0	#NAME?	1	no	0.220338	0.162845	-0.436222	1	no	0.196883	0.144491	-0.446362	1	no	0.120046	0	#NAME?	1	no	#NAME?	0.436222	0.446362	#NAME?	no	no	no	no
ENSDARG00000094260	ENSDARG00000094260	si:ch211-286e11.3	chr8:42034048-42116531	0.0202981	0	#NAME?	1	no	0.0590932	0	#NAME?	1	no	0.0528039	0.0258499	-1.03049	1	no	0	0	0	1	no	#NAME?	#NAME?	1.03049	0	no	no	no	no
ENSDARG00000094600	ENSDARG00000094600	si:ch211-287c22.2	chr5:25426867-25427522	0	0.0161037	inf	1	no	0	0	0	1	no	0	0	0	1	no	0	0.0164653	inf	1	no	#VALUE!	0	0	#VALUE!	no	no	no	no
ENSDARG00000093839	ENSDARG00000093839	si:ch211-30g3.6	chr5:63492550-63571600	0.0185956	0	#NAME?	1	no	0	0.0364426	inf	1	no	0	0.0236805	inf	1	no	0.0268222	0	#NAME?	1	no	#NAME?	#VALUE!	#VALUE!	#NAME?	no	no	no	no
ENSDARG00000094231	ENSDARG00000094231	si:ch211-30g3.8	chr5:63492550-63571600	0	0.0509117	inf	1	no	0	0	0	1	no	0	0	0	1	no	0	0.0519199	inf	1	no	#VALUE!	0	0	#VALUE!	no	no	no	no
ENSDARG00000095653	ENSDARG00000095653	si:ch211-32p8.2	chr24:39906442-39967952	0.0227072	0	#NAME?	1	no	0	0	0	1	no	0	0.0285866	inf	1	no	0	0	0	1	no	#NAME?	0	#VALUE!	0	no	no	no	no
ENSDARG00000093023	ENSDARG00000093023	si:ch211-37p17.4	chr8:51410747-51416851	0	0.104966	inf	1	no	0	0	0	1	no	0	0	0	1	no	0	0.107131	inf	1	no	#VALUE!	0	0	#VALUE!	no	no	no	no
ENSDARG00000092573	ENSDARG00000092573	si:ch211-3o3.8	chr9:41947236-41997986	0.0147999	0	#NAME?	1	no	0.0208675	0.0341665	0.711329	1	no	0.0186474	0.018632	-0.00119725	1	no	0.0252202	0	#NAME?	1	no	#NAME?	-0.711329	0.00119725	#NAME?	no	no	no	no
ENSDARG00000096551	ENSDARG00000096551	si:ch211-45m15.6	chr20:2280941-2285621	0.0315159	0	#NAME?	1	no	0	0	0	1	no	0	0.0396761	inf	1	no	0	0	0	1	no	#NAME?	0	#VALUE!	0	no	no	no	no
ENSDARG00000094920	ENSDARG00000094920	si:ch211-4l14.2	chr18:44033548-44059293	0.0169829	0	#NAME?	1	no	0.0962101	0	#NAME?	1	no	0.0859725	0.0213802	-2.0076	1	no	0	0	0	1	no	#NAME?	#NAME?	2.0076	0	no	no	no	no
ENSDARG00000091421	ENSDARG00000091421	si:ch211-57m13.16	chr10:6275746-6303839	0	0.0113223	inf	1	no	0.0126134	0	#NAME?	1	no	0.0112715	0	#NAME?	1	no	0	0.0115465	inf	1	no	#VALUE!	#NAME?	#NAME?	#VALUE!	no	no	no	no
ENSDARG00000095973	ENSDARG00000095973	si:ch211-57m13.17	chr10:6325730-6327540	0.00696625	0	#NAME?	1	no	0	0	0	1	no	0	0.00875097	inf	1	no	0	0	0	1	no	#NAME?	0	#VALUE!	0	no	no	no	no
ENSDARG00000095198	ENSDARG00000095198	si:ch211-64i20.4	chr4:54906649-54922391	0.00678202	0	#NAME?	1	no	0.0327758	0	#NAME?	1	no	0.0292861	0.00851954	-1.78137	1	no	0	0	0	1	no	#NAME?	#NAME?	1.78137	0	no	no	no	no
ENSDARG00000094631	ENSDARG00000094631	si:ch211-81a5.2	chr19:9652554-9709318	0.0253634	0	#NAME?	1	no	0	0	0	1	no	0	0.0318613	inf	1	no	0	0	0	1	no	#NAME?	0	#VALUE!	0	no	no	no	no
ENSDARG00000095957	ENSDARG00000095957	si:ch211-87n12.1	chr22:23308150-23316793	0	0.0220774	inf	1	no	0	0	0	1	no	0	0	0	1	no	0	0.0225732	inf	1	no	#VALUE!	0	0	#VALUE!	no	no	no	no
ENSDARG00000095508	ENSDARG00000095508	si:ch211-89f22.1	chr14:49797992-49801740	0.0194043	0	#NAME?	1	no	0.112982	0.0760699	-0.570699	1	no	0.100958	0.0247113	-2.03051	1	no	0.0559883	0	#NAME?	1	no	#NAME?	0.570699	2.03051	#NAME?	no	no	no	no
ENSDARG00000094006	ENSDARG00000094006	si:ch211-8c17.3	chr3:12415958-12438274	0.135893	0	#NAME?	1	no	0.169551	0.0261508	-2.69679	1	no	0.151517	0.171468	0.178467	1	no	0.0192473	0	#NAME?	1	no	#NAME?	2.69679	-0.178467	#NAME?	no	no	no	no
ENSDARG00000071837	ENSDARG00000071837	si:ch211-93e11.6	chr12:6003439-6012547	0.0235085	0	#NAME?	1	no	0.017239	0.0234214	0.442149	1	no	0.015405	0.0297547	0.949721	1	no	0.0172384	0	#NAME?	1	no	#NAME?	-0.442149	-0.949721	#NAME?	no	no	no	no
ENSDARG00000092842	ENSDARG00000092842	si:ch211-93g21.2	chr21:6918202-6920061	0.0257748	0	#NAME?	1	no	0.041521	0	#NAME?	1	no	0.0371002	0.0323781	-0.196409	1	no	0	0	0	1	no	#NAME?	#NAME?	0.196409	0	no	no	no	no
ENSDARG00000095520	ENSDARG00000095520	si:ch211-9d9.7	chr2:51812255-51813699	0	0.0102653	inf	1	no	0.482061	0.296921	-0.699137	1	no	0.430765	0	#NAME?	1	no	0.218792	0.0104085	-4.39372	1	no	#VALUE!	0.699137	#NAME?	4.39372	no	no	no	no
ENSDARG00000093432	ENSDARG00000093432	si:ch211-9n13.3	chr19:35822863-35827533	0	0.0204024	inf	1	no	0	0.0340869	inf	1	no	0	0	0	1	no	0.0250884	0.0208606	-0.266239	1	no	#VALUE!	#VALUE!	0	0.266239	no	no	no	no
ENSDARG00000055056	ENSDARG00000055056	si:ch73-129a22.11	chr2:22929931-22931788	0.00878954	0	#NAME?	1	no	0	0.0455511	inf	1	no	0	0.0110414	inf	1	no	0.0336237	0	#NAME?	1	no	#NAME?	#VALUE!	#VALUE!	#NAME?	no	no	no	no
ENSDARG00000095867	ENSDARG00000095867	si:ch73-132k15.2	chr8:52659681-52661203	0.0670086	0	#NAME?	1	no	0.166551	0	#NAME?	1	no	0.148832	0.0849217	-0.809478	1	no	0	0	0	1	no	#NAME?	#NAME?	0.809478	0	no	no	no	no
ENSDARG00000039257	ENSDARG00000039257	si:ch73-137d22.1	chr3:9754281-9794536	0	0.0146128	inf	1	no	0	0	0	1	no	0	0	0	1	no	0	0.014941	inf	1	no	#VALUE!	0	0	#VALUE!	no	no	no	no
ENSDARG00000094583	ENSDARG00000094583	si:ch73-137d22.2	chr3:9802087-9809162	0.00956756	0	#NAME?	1	no	0	0	0	1	no	0	0.0120448	inf	1	no	0	0	0	1	no	#NAME?	0	#VALUE!	0	no	no	no	no
ENSDARG00000094576	ENSDARG00000094576	si:ch73-166n24.2	chr5:25000087-25010558	0.0155474	0	#NAME?	1	no	0.0993016	0	#NAME?	1	no	0.088733	0.0195305	-2.18374	1	no	0	0	0	1	no	#NAME?	#NAME?	2.18374	0	no	no	no	no
ENSDARG00000095850	ENSDARG00000095850	si:ch73-211l13.8	chr3:1959678-1964481	0.126108	0	#NAME?	1	no	0	0	0	1	no	0	0.158761	inf	1	no	0	0	0	1	no	#NAME?	0	#VALUE!	0	no	no	no	no
ENSDARG00000092880	ENSDARG00000092880	si:ch73-234b20.6	chr10:4989451-4990885	0	0.0249776	inf	1	no	0	0.0455596	inf	1	no	0	0	0	1	no	0.03363	0.0254722	-0.400825	1	no	#VALUE!	#VALUE!	0	0.400825	no	no	no	no
ENSDARG00000096535	ENSDARG00000096535	si:ch73-236c18.5	chr1:59119198-59122572	0.0117511	0	#NAME?	1	no	0.0179431	0	#NAME?	1	no	0.0160336	0.0148113	-0.1144	1	no	0	0	0	1	no	#NAME?	#NAME?	0.1144	0	no	no	no	no
ENSDARG00000093157	ENSDARG00000093157	si:ch73-236c18.8	chr1:59073439-59087562	0.0160342	0	#NAME?	1	no	0	0	0	1	no	0	0.0203405	inf	1	no	0	0	0	1	no	#NAME?	0	#VALUE!	0	no	no	no	no
ENSDARG00000096525	ENSDARG00000096525	si:ch73-243e13.1	chr1:3330880-3343956	0	0.0267267	inf	1	no	0	0	0	1	no	0	0	0	1	no	0	0.027256	inf	1	no	#VALUE!	0	0	#VALUE!	no	no	no	no
ENSDARG00000092513	ENSDARG00000092513	si:ch73-256j6.1	chr22:4580769-4586006	0.0151882	0	#NAME?	1	no	0.0326972	0.032079	-0.0275376	1	no	0.0292159	0.0191208	-0.611609	1	no	0.0236481	0	#NAME?	1	no	#NAME?	0.0275376	0.611609	#NAME?	no	no	no	no
ENSDARG00000071653	ENSDARG00000071653	si:ch73-256j6.2	chr22:4567987-4572274	0	0.0263188	inf	1	no	0.0542521	0	#NAME?	1	no	0.0484804	0	#NAME?	1	no	0	0.0269098	inf	1	no	#VALUE!	#NAME?	#NAME?	#VALUE!	no	no	no	no
ENSDARG00000094604	ENSDARG00000094604	si:ch73-256j6.3	chr22:4550123-4554242	0.00652924	0	#NAME?	1	no	0	0	0	1	no	0	0.00821982	inf	1	no	0	0	0	1	no	#NAME?	0	#VALUE!	0	no	no	no	no
ENSDARG00000087357	ENSDARG00000087357	si:ch73-25i22.2	chr18:5223549-5228478	0.0095093	0	#NAME?	1	no	0	0	0	1	no	0	0.0119717	inf	1	no	0	0	0	1	no	#NAME?	0	#VALUE!	0	no	no	no	no
ENSDARG00000076438	ENSDARG00000076438	si:ch73-261i21.5	chr10:30688236-30716862	0.0297475	0	#NAME?	1	no	0.0369488	0.0316136	-0.224983	1	no	0.0330148	0.037804	0.195423	1	no	0.0232934	0	#NAME?	1	no	#NAME?	0.224983	-0.195423	#NAME?	no	no	no	no
ENSDARG00000094172	ENSDARG00000094172	si:ch73-263f13.1	chr5:13705893-13727396	0.089871	0	#NAME?	1	no	0	0.211373	inf	1	no	0	0.113365	inf	1	no	0.155927	0	#NAME?	1	no	#NAME?	#VALUE!	#VALUE!	#NAME?	no	no	no	no
ENSDARG00000094161	ENSDARG00000094161	si:ch73-265d7.2	chr23:44750217-44757455	0	0.0289923	inf	1	no	0.0541164	0.101844	0.912229	1	no	0.048356	0	#NAME?	1	no	0.0750211	0.0296433	-1.33959	1	no	#VALUE!	-0.912229	#NAME?	1.33959	no	no	no	no
ENSDARG00000071183	ENSDARG00000071183	si:ch73-272h16.1	chr6:7803737-7805667	0.0106237	0	#NAME?	1	no	0.0147811	0.020352	0.461424	1	no	0.0132073	0.0133753	0.018237	1	no	0.014978	0	#NAME?	1	no	#NAME?	-0.461424	-0.018237	#NAME?	no	no	no	no
ENSDARG00000075240	ENSDARG00000075240	si:ch73-272h16.3	chr6:7831696-7833032	0	0.0215855	inf	1	no	0	0	0	1	no	0	0	0	1	no	0	0.0218866	inf	1	no	#VALUE!	0	0	#VALUE!	no	no	no	no
ENSDARG00000095296	ENSDARG00000095296	si:ch73-274k23.1	chr5:67017561-67132547	0.0340495	0	#NAME?	1	no	0.0845105	0.192578	1.18824	1	no	0.0755197	0.0427591	-0.820622	1	no	0.141721	0	#NAME?	1	no	#NAME?	-1.18824	0.820622	#NAME?	no	no	no	no
ENSDARG00000093345	ENSDARG00000093345	si:ch73-27e22.7	chr22:8574831-8581623	0.0628308	0	#NAME?	1	no	0.0637915	0.0214751	-1.5707	1	no	0.0570022	0.0794965	0.479872	1	no	0.0158059	0	#NAME?	1	no	#NAME?	1.5707	-0.479872	#NAME?	no	no	no	no
ENSDARG00000092307	ENSDARG00000092307	si:ch73-287n15.1	chr23:30299942-30937255	0	0.0146595	inf	1	no	0.0419139	0.00950477	-2.1407	1	no	0.037453	0	#NAME?	1	no	0.00697416	0.0148641	1.09174	1	no	#VALUE!	2.1407	#NAME?	-1.09174	no	no	no	no
ENSDARG00000076310	ENSDARG00000076310	si:ch73-290k24.5	chr23:45939948-45985841	0.0141899	0	#NAME?	1	no	0.00999363	0.0148818	0.574468	1	no	0.00893001	0.0178982	1.00308	1	no	0.0109738	0	#NAME?	1	no	#NAME?	-0.574468	-1.00308	#NAME?	no	no	no	no
ENSDARG00000093208	ENSDARG00000093208	si:ch73-299h12.8	chr21:2549720-2555703	0.0332733	0	#NAME?	1	no	0	0.0934487	inf	1	no	0	0.0420255	inf	1	no	0.0688367	0	#NAME?	1	no	#NAME?	#VALUE!	#VALUE!	#NAME?	no	no	no	no
ENSDARG00000090948	ENSDARG00000090948	si:ch73-29c22.1	chr21:5173380-5189901	0	0.0173454	inf	1	no	0.0115365	0.0313497	1.44224	1	no	0.0103092	0	#NAME?	1	no	0.0230735	0.0176412	-0.387288	1	no	#VALUE!	-1.44224	#NAME?	0.387288	no	no	no	no
ENSDARG00000095297	ENSDARG00000095297	si:ch73-341p18.6	chr1:56263672-56268261	0	0.00838975	inf	1	no	0.0207264	0.0084461	-1.29511	1	no	0.0185209	0	#NAME?	1	no	0.00623452	0.00857815	0.460388	1	no	#VALUE!	1.29511	#NAME?	-0.460388	no	no	no	no
ENSDARG00000094357	ENSDARG00000094357	si:ch73-343l4.1	chr1:56391535-56391818	0.183991	0	#NAME?	1	no	0	0	0	1	no	0	0.234313	inf	1	no	0	0	0	1	no	#NAME?	0	#VALUE!	0	no	no	no	no
ENSDARG00000092502	ENSDARG00000092502	si:ch73-343l4.3	chr1:56408792-56413397	0	0.0689913	inf	1	no	0	0	0	1	no	0	0	0	1	no	0	0.0703575	inf	1	no	#VALUE!	0	0	#VALUE!	no	no	no	no
ENSDARG00000093277	ENSDARG00000093277	si:ch73-366i20.25	chr2:14609365-14609830	0.0873613	0	#NAME?	1	no	0	0	0	1	no	0	0.109981	inf	1	no	0	0	0	1	no	#NAME?	0	#VALUE!	0	no	no	no	no
ENSDARG00000094547	ENSDARG00000094547	si:ch73-36i7.2	chr24:4232678-4234119	0	0.0192194	inf	1	no	0	0	0	1	no	0	0	0	1	no	0	0.0194876	inf	1	no	#VALUE!	0	0	#VALUE!	no	no	no	no
ENSDARG00000094406	ENSDARG00000094406	si:ch73-374a6.2	chr18:45730106-45790172	0	0.060681	inf	1	no	0	0	0	1	no	0	0	0	1	no	0	0.0619648	inf	1	no	#VALUE!	0	0	#VALUE!	no	no	no	no
ENSDARG00000092723	ENSDARG00000092723	si:ch73-381f5.2	chr23:19424464-19429331	0.00289342	0	#NAME?	1	no	0	0	0	1	no	0	0.0036347	inf	1	no	0	0	0	1	no	#NAME?	0	#VALUE!	0	no	no	no	no
ENSDARG00000095260	ENSDARG00000095260	si:ch73-388k15.1	chr15:6656201-6657736	0	0.0944249	inf	1	no	0	0	0	1	no	0	0	0	1	no	0	0.0962948	inf	1	no	#VALUE!	0	0	#VALUE!	no	no	no	no
ENSDARG00000092800	ENSDARG00000092800	si:ch73-77n15.1	chr10:24364973-24727785	0	0.00966691	inf	1	no	0	0	0	1	no	0	0	0	1	no	0	0.00980179	inf	1	no	#VALUE!	0	0	#VALUE!	no	no	no	no
ENSDARG00000086718	ENSDARG00000086718	si:ch73-77n15.2	chr10:24364973-24727785	0.0489973	0	#NAME?	1	no	0	0	0	1	no	0	0.0618385	inf	1	no	0	0	0	1	no	#NAME?	0	#VALUE!	0	no	no	no	no
ENSDARG00000093749	ENSDARG00000093749	si:ch73-83c10.2	chr9:4448454-4451641	0.0044753	0	#NAME?	1	no	0.00657216	0.0105715	0.685746	1	no	0.00587242	0.00569928	-0.0431759	1	no	0.00780343	0	#NAME?	1	no	#NAME?	-0.685746	0.0431759	#NAME?	no	no	no	no
ENSDARG00000096671	ENSDARG00000096671	si:ch73-94k4.3	chr1:57874378-57886230	0.00877993	0	#NAME?	1	no	0.063562	0	#NAME?	1	no	0.0567987	0.0111812	-2.34478	1	no	0	0	0	1	no	#NAME?	#NAME?	2.34478	0	no	no	no	no
ENSDARG00000094198	ENSDARG00000094198	si:dkey-100j22.7	chr23:40726398-40780345	0.0259433	0	#NAME?	1	no	0.00209414	0.203358	6.60152	1	no	0.00189414	0.032964	4.12127	1	no	0.150181	0	#NAME?	1	no	#NAME?	-6.60152	-4.12127	#NAME?	no	no	no	no
ENSDARG00000071745	ENSDARG00000071745	si:dkey-101n15.3	chr12:10004308-10006253	0	0.00909467	inf	1	no	0	0	0	1	no	0	0	0	1	no	0	0.00922157	inf	1	no	#VALUE!	0	0	#VALUE!	no	no	no	no
ENSDARG00000095465	ENSDARG00000095465	si:dkey-105f21.1	chr4:45473612-45476395	0	0.0106999	inf	1	no	0	0	0	1	no	0	0	0	1	no	0	0.0108492	inf	1	no	#VALUE!	0	0	#VALUE!	no	no	no	no
ENSDARG00000070015	ENSDARG00000070015	si:dkey-108d22.5	chr4:10440437-10511699	0	0.0171768	inf	1	no	0	0	0	1	no	0	0	0	1	no	0	0.0175625	inf	1	no	#VALUE!	0	0	#VALUE!	no	no	no	no
ENSDARG00000092040	ENSDARG00000092040	si:dkey-108f8.7	chr16:28745539-28746677	0.0136353	0	#NAME?	1	no	0.0196721	0	#NAME?	1	no	0.0175792	0.0173645	-0.0177271	1	no	0	0	0	1	no	#NAME?	#NAME?	0.0177271	0	no	no	no	no
ENSDARG00000094830	ENSDARG00000094830	si:dkey-10g2.4	chr5:63447301-63448791	0.0156793	0	#NAME?	1	no	0	0.214295	inf	1	no	0	0.0197391	inf	1	no	0.158182	0	#NAME?	1	no	#NAME?	#VALUE!	#VALUE!	#NAME?	no	no	no	no
ENSDARG00000094164	ENSDARG00000094164	si:dkey-111k7.3	chr6:36251292-36320674	0.0142638	0	#NAME?	1	no	0.0418941	0.0336941	-0.314254	1	no	0.0374336	0.018165	-1.04318	1	no	0.0248714	0	#NAME?	1	no	#NAME?	0.314254	1.04318	#NAME?	no	no	no	no
ENSDARG00000093976	ENSDARG00000093976	si:dkey-111m11.1	chr18:24343881-24344092	1.02537	0	#NAME?	1	no	0	0	0	1	no	0	1.29086	inf	1	no	0	0	0	1	no	#NAME?	0	#VALUE!	0	no	no	no	no
ENSDARG00000095043	ENSDARG00000095043	si:dkey-114b16.2	chr8:28036228-28039329	0	0.045554	inf	1	no	0	0	0	1	no	0	0	0	1	no	0	0.0464561	inf	1	no	#VALUE!	0	0	#VALUE!	no	no	no	no
ENSDARG00000092613	ENSDARG00000092613	si:dkey-114b16.3	chr8:28044522-28047625	0.0160332	0	#NAME?	1	no	0	0	0	1	no	0	0.0201409	inf	1	no	0	0	0	1	no	#NAME?	0	#VALUE!	0	no	no	no	no
ENSDARG00000092205	ENSDARG00000092205	si:dkey-114b16.4	chr8:28050045-28054047	0.198515	0	#NAME?	1	no	0.361861	0	#NAME?	1	no	0.323351	0.249374	-0.374788	1	no	0	0	0	1	no	#NAME?	#NAME?	0.374788	0	no	no	no	no
ENSDARG00000096593	ENSDARG00000096593	si:dkey-118k5.5	chr15:27703906-27714273	0	0.0180879	inf	1	no	0	0.0349693	inf	1	no	0	0	0	1	no	0.0258128	0.0183403	-0.493068	1	no	#VALUE!	#VALUE!	0	0.493068	no	no	no	no
ENSDARG00000094495	ENSDARG00000094495	si:dkey-11d18.2	chr18:22284910-22468784	0.0202651	0	#NAME?	1	no	0	0.0236602	inf	1	no	0	0.0258074	inf	1	no	0.0174649	0	#NAME?	1	no	#NAME?	#VALUE!	#VALUE!	#NAME?	no	no	no	no
ENSDARG00000095586	ENSDARG00000095586	si:dkey-11e23.9	chr25:24955306-24957223	0	0.0687626	inf	1	no	0	0.0419927	inf	1	no	0	0	0	1	no	0.0309071	0.0699358	1.17809	1	no	#VALUE!	#VALUE!	0	-1.17809	no	no	no	no
ENSDARG00000095943	ENSDARG00000095943	si:dkey-11f7.4	chr16:10853495-10854598	0	0.044737	inf	1	no	0	0.103785	inf	1	no	0	0	0	1	no	0.0766093	0.0453612	-0.756061	1	no	#VALUE!	#VALUE!	0	0.756061	no	no	no	no
ENSDARG00000078162	ENSDARG00000078162	si:dkey-11f7.5	chr16:10822971-10829543	0	0.0215553	inf	1	no	0.0360205	0	#NAME?	1	no	0.0321884	0	#NAME?	1	no	0	0.0220463	inf	1	no	#VALUE!	#NAME?	#NAME?	#VALUE!	no	no	no	no
ENSDARG00000092263	ENSDARG00000092263	si:dkey-121h17.6	chr21:5404333-5444944	0.0140388	0	#NAME?	1	no	0	0	0	1	no	0	0.0176355	inf	1	no	0	0	0	1	no	#NAME?	0	#VALUE!	0	no	no	no	no
ENSDARG00000096547	ENSDARG00000096547	si:dkey-126h10.3	chr20:1605420-1694893	0	0.0459932	inf	1	no	0	0.0263193	inf	1	no	0	0	0	1	no	0.0193713	0.046869	1.27471	1	no	#VALUE!	#VALUE!	0	-1.27471	no	no	no	no
ENSDARG00000093815	ENSDARG00000093815	si:dkey-12n16.1	chr18:4041802-4051936	0.0154766	0	#NAME?	1	no	0.0223286	0	#NAME?	1	no	0.0199531	0.0197095	-0.0177271	1	no	0	0	0	1	no	#NAME?	#NAME?	0.0177271	0	no	no	no	no
ENSDARG00000092793	ENSDARG00000092793	si:dkey-13n15.10	chr5:23057492-23061829	0.081008	0	#NAME?	1	no	0.0204291	0.0272677	0.416566	1	no	0.018254	0.102725	2.4925	1	no	0.0200694	0	#NAME?	1	no	#NAME?	-0.416566	-2.4925	#NAME?	no	no	no	no
ENSDARG00000076694	ENSDARG00000076694	si:dkey-145c18.2	chr18:32016885-32024295	0	0.00202699	inf	1	no	0	0.015608	inf	1	no	0	0	0	1	no	0.0114877	0.00205527	-2.48269	1	no	#VALUE!	#VALUE!	0	2.48269	no	no	no	no
ENSDARG00000095263	ENSDARG00000095263	si:dkey-145c18.4	chr18:31990635-31995459	0	0.0208082	inf	1	no	0.115376	0.201904	0.807322	1	no	0.1031	0	#NAME?	1	no	0.148738	0.0212755	-2.80551	1	no	#VALUE!	-0.807322	#NAME?	2.80551	no	no	no	no
ENSDARG00000092709	ENSDARG00000092709	si:dkey-145c18.6	chr18:31942902-31963796	0.0105094	0	#NAME?	1	no	0.0460294	0.0205999	-1.15992	1	no	0.0411299	0.0133837	-1.61971	1	no	0.0151618	0	#NAME?	1	no	#NAME?	1.15992	1.61971	#NAME?	no	no	no	no
ENSDARG00000096540	ENSDARG00000096540	si:dkey-148e3.2	chr1:31471408-31472087	0.0237611	0	#NAME?	1	no	0	0	0	1	no	0	0.0298485	inf	1	no	0	0	0	1	no	#NAME?	0	#VALUE!	0	no	no	no	no
ENSDARG00000092491	ENSDARG00000092491	si:dkey-149i17.8	chr2:24666575-24671484	0.0214233	0	#NAME?	1	no	0	0	0	1	no	0	0.0272825	inf	1	no	0	0	0	1	no	#NAME?	0	#VALUE!	0	no	no	no	no
ENSDARG00000096152	ENSDARG00000096152	si:dkey-149m13.4	chr4:55576682-55622718	0.00625818	0	#NAME?	1	no	0.02663	0.0119885	-1.15139	1	no	0.0237961	0.00787862	-1.59471	1	no	0.00882378	0	#NAME?	1	no	#NAME?	1.15139	1.59471	#NAME?	no	no	no	no
ENSDARG00000077877	ENSDARG00000077877	si:dkey-14o18.1	chr19:10393952-10398611	0	0.00179911	inf	1	no	0	0	0	1	no	0	0	0	1	no	0	0.00183474	inf	1	no	#VALUE!	0	0	#VALUE!	no	no	no	no
ENSDARG00000094748	ENSDARG00000094748	si:dkey-14o18.7	chr19:10289516-10306044	0	0.0474257	inf	1	no	0	0.133177	inf	1	no	0	0	0	1	no	0.098221	0.048421	-1.0204	1	no	#VALUE!	#VALUE!	0	1.0204	no	no	no	no
ENSDARG00000096130	ENSDARG00000096130	si:dkey-14o6.10	chr4:48718444-48786306	3.84778e-06	0	#NAME?	1	no	0.00823038	0	#NAME?	1	no	0.00735477	3.76691e-06	-10.9311	1	no	0	0	0	1	no	#NAME?	#NAME?	10.9311	0	no	no	no	no
ENSDARG00000095934	ENSDARG00000095934	si:dkey-151m22.8	chr1:34381375-34382850	0.00637581	0	#NAME?	1	no	0.0102709	0	#NAME?	1	no	0.00917735	0.00800926	-0.196409	1	no	0	0	0	1	no	#NAME?	#NAME?	0.196409	0	no	no	no	no
ENSDARG00000086487	ENSDARG00000086487	si:dkey-152b24.7	chr16:49641153-49645582	0	0.0669781	inf	1	no	0	0.014124	inf	1	no	0	0	0	1	no	0.0103955	0.0684344	2.71877	1	no	#VALUE!	#VALUE!	0	-2.71877	no	no	no	no
ENSDARG00000092486	ENSDARG00000092486	si:dkey-152b24.8	chr16:49634258-49637183	0.0271362	0	#NAME?	1	no	0	0.0227048	inf	1	no	0	0.0342547	inf	1	no	0.0167597	0	#NAME?	1	no	#NAME?	#VALUE!	#VALUE!	#NAME?	no	no	no	no
ENSDARG00000096062	ENSDARG00000096062	si:dkey-157e10.7	chr4:44476616-44486045	0.00547468	0	#NAME?	1	no	0.00796915	0.00646615	-0.301519	1	no	0.007121	0.00697199	-0.0305076	1	no	0.00477301	0	#NAME?	1	no	#NAME?	0.301519	0.0305076	#NAME?	no	no	no	no
ENSDARG00000096102	ENSDARG00000096102	si:dkey-157e10.8	chr4:44469515-44471025	0	0.292098	inf	1	no	0	0	0	1	no	0	0	0	1	no	0	0.297882	inf	1	no	#VALUE!	0	0	#VALUE!	no	no	no	no
ENSDARG00000092957	ENSDARG00000092957	si:dkey-157g16.7	chr23:27375507-27476291	0	0.0273655	inf	1	no	0	0	0	1	no	0	0	0	1	no	0	0.0279074	inf	1	no	#VALUE!	0	0	#VALUE!	no	no	no	no
ENSDARG00000093965	ENSDARG00000093965	si:dkey-158e13.2	chr19:23614924-23615563	0	0.0765556	inf	1	no	0	0	0	1	no	0	0	0	1	no	0	0.0778745	inf	1	no	#VALUE!	0	0	#VALUE!	no	no	no	no
ENSDARG00000093299	ENSDARG00000093299	si:dkey-15h8.8	chr22:3048400-3050924	0.0409006	0	#NAME?	1	no	0	0	0	1	no	0	0.0513791	inf	1	no	0	0	0	1	no	#NAME?	0	#VALUE!	0	no	no	no	no
ENSDARG00000042683	ENSDARG00000042683	si:dkey-15j16.3	chr20:23823019-23824731	0	0.0929971	inf	1	no	0.0284514	0.0228825	-0.314254	1	no	0.0254222	0	#NAME?	1	no	0.0168908	0.0948715	2.48974	1	no	#VALUE!	0.314254	#NAME?	-2.48974	no	no	no	no
ENSDARG00000096633	ENSDARG00000096633	si:dkey-162h11.4	chr7:972915-999235	0.141742	0	#NAME?	1	no	0	0	0	1	no	0	0.180508	inf	1	no	0	0	0	1	no	#NAME?	0	#VALUE!	0	no	no	no	no
ENSDARG00000094861	ENSDARG00000094861	si:dkey-163f12.11	chr8:21964018-21971047	0.331129	0	#NAME?	1	no	2.39009	0.473417	-2.33588	1	no	2.13572	0.420059	-2.34606	1	no	0.348995	0	#NAME?	1	no	#NAME?	2.33588	2.34606	#NAME?	no	no	no	no
ENSDARG00000087362	ENSDARG00000087362	si:dkey-165b20.3	chr4:35763915-35778133	0	0.0113834	inf	1	no	0	0.0199747	inf	1	no	0	0	0	1	no	0.0147443	0.0116393	-0.341154	1	no	#VALUE!	#VALUE!	0	0.341154	no	no	no	no
ENSDARG00000092811	ENSDARG00000092811	si:dkey-167i21.4	chr1:17571241-17574751	0.0138258	0	#NAME?	1	no	0.0609113	0.0416928	-0.546913	1	no	0.0544261	0.0176071	-1.62814	1	no	0.0307563	0	#NAME?	1	no	#NAME?	0.546913	1.62814	#NAME?	no	no	no	no
ENSDARG00000095061	ENSDARG00000095061	si:dkey-167k11.1	chr3:1146165-1148562	0.00938928	0	#NAME?	1	no	0.0602355	0.040377	-0.577081	1	no	0.0538234	0.0117948	-2.19009	1	no	0.0297179	0	#NAME?	1	no	#NAME?	0.577081	2.19009	#NAME?	no	no	no	no
ENSDARG00000096470	ENSDARG00000096470	si:dkey-16b10.2	chr4:43167470-43357177	0	0.00912806	inf	1	no	0.0397895	0.0336294	-0.242668	1	no	0.0355541	0	#NAME?	1	no	0.024791	0.00933304	-1.4094	1	no	#VALUE!	0.242668	#NAME?	1.4094	no	no	no	no
ENSDARG00000094459	ENSDARG00000094459	si:dkey-16p19.10	chr4:35048416-35065395	0.0101341	0	#NAME?	1	no	0.0508801	0.038345	-0.408063	1	no	0.0454657	0.012758	-1.83337	1	no	0.0282725	0	#NAME?	1	no	#NAME?	0.408063	1.83337	#NAME?	no	no	no	no
ENSDARG00000096414	ENSDARG00000096414	si:dkey-172o7.1	chr6:5552865-5620075	0	0.0193684	inf	1	no	0	0	0	1	no	0	0	0	1	no	0	0.0198033	inf	1	no	#VALUE!	0	0	#VALUE!	no	no	no	no
ENSDARG00000096082	ENSDARG00000096082	si:dkey-176f19.2	chr4:36019098-36026570	0.00301176	0	#NAME?	1	no	0	0	0	1	no	0	0.00383547	inf	1	no	0	0	0	1	no	#NAME?	0	#VALUE!	0	no	no	no	no
ENSDARG00000096057	ENSDARG00000096057	si:dkey-176f19.5	chr4:36095663-36107926	0	0.0159836	inf	1	no	0.0626405	0.0533465	-0.231703	1	no	0.0559748	0	#NAME?	1	no	0.0393261	0.0163001	-1.2706	1	no	#VALUE!	0.231703	#NAME?	1.2706	no	no	no	no
ENSDARG00000093971	ENSDARG00000093971	si:dkey-177g18.1	chr23:11450846-11452001	0.0330938	0	#NAME?	1	no	0	0	0	1	no	0	0.0421449	inf	1	no	0	0	0	1	no	#NAME?	0	#VALUE!	0	no	no	no	no
ENSDARG00000094322	ENSDARG00000094322	si:dkey-178e17.2	chr8:2108589-2112651	0.0091001	0	#NAME?	1	no	0.0130605	0.0630246	2.27071	1	no	0.0116699	0.0114563	-0.0266461	1	no	0.0465218	0	#NAME?	1	no	#NAME?	-2.27071	0.0266461	#NAME?	no	no	no	no
ENSDARG00000094789	ENSDARG00000094789	si:dkey-179k24.3	chr4:47420331-47426806	0.00456277	0	#NAME?	1	no	0.0173716	0.0210682	0.278336	1	no	0.0155226	0.00574419	-1.4342	1	no	0.015552	0	#NAME?	1	no	#NAME?	-0.278336	1.4342	#NAME?	no	no	no	no
ENSDARG00000092603	ENSDARG00000092603	si:dkey-181m19.17	chr10:41868474-41869500	0	0.000111292	inf	1	no	0	0	0	1	no	0	0	0	1	no	0	0.000115895	inf	1	no	#VALUE!	0	0	#VALUE!	no	no	no	no
ENSDARG00000093538	ENSDARG00000093538	si:dkey-182g1.5	chr22:8634967-8765640	0.00806759	0	#NAME?	1	no	0	0	0	1	no	0	0.0101565	inf	1	no	0	0	0	1	no	#NAME?	0	#VALUE!	0	no	no	no	no
ENSDARG00000052296	ENSDARG00000052296	si:dkey-183g16.1	chr2:17328079-17330598	0	0.0100045	inf	1	no	0.0283505	0	#NAME?	1	no	0.0253344	0	#NAME?	1	no	0	0.010144	inf	1	no	#VALUE!	#NAME?	#NAME?	#VALUE!	no	no	no	no
ENSDARG00000091937	ENSDARG00000091937	si:dkey-184d2.3	chr9:37797843-37799128	0.0103167	0	#NAME?	1	no	0.0151506	0	#NAME?	1	no	0.0135375	0.0131383	-0.0431759	1	no	0	0	0	1	no	#NAME?	#NAME?	0.0431759	0	no	no	no	no
ENSDARG00000095731	ENSDARG00000095731	si:dkey-184j23.1	chr19:4110318-4149210	0.0116433	0	#NAME?	1	no	0	0	0	1	no	0	0.0146581	inf	1	no	0	0	0	1	no	#NAME?	0	#VALUE!	0	no	no	no	no
ENSDARG00000058682	ENSDARG00000058682	si:dkey-184p9.9	chr21:9959442-9967658	0.00736449	0	#NAME?	1	no	0	0	0	1	no	0	0.00927134	inf	1	no	0	0	0	1	no	#NAME?	0	#VALUE!	0	no	no	no	no
ENSDARG00000095317	ENSDARG00000095317	si:dkey-189d19.1	chr18:28933386-28936812	0	0.0679534	inf	1	no	0	0	0	1	no	0	0	0	1	no	0	0.0689016	inf	1	no	#VALUE!	0	0	#VALUE!	no	no	no	no
ENSDARG00000092298	ENSDARG00000092298	si:dkey-18o7.2	chr4:15125947-15130128	0.114776	0	#NAME?	1	no	0.218393	0.503682	1.20559	1	no	0.195154	0.145044	-0.428128	1	no	0.371478	0	#NAME?	1	no	#NAME?	-1.20559	0.428128	#NAME?	no	no	no	no
ENSDARG00000094703	ENSDARG00000094703	si:dkey-190g11.5	chr8:17606459-17616465	0.0199209	0	#NAME?	1	no	0.0150346	0.0654693	2.12253	1	no	0.0134351	0.0252048	0.90769	1	no	0.0482389	0	#NAME?	1	no	#NAME?	-2.12253	-0.90769	#NAME?	no	no	no	no
ENSDARG00000095445	ENSDARG00000095445	si:dkey-191c17.2	chr8:33762667-33962244	0	0.00991014	inf	1	no	0.0140416	0	#NAME?	1	no	0.0125477	0	#NAME?	1	no	0	0.0100484	inf	1	no	#VALUE!	#NAME?	#NAME?	#VALUE!	no	no	no	no
ENSDARG00000096550	ENSDARG00000096550	si:dkey-191m6.3	chr12:2693005-2757229	0.0420635	0	#NAME?	1	no	0	0	0	1	no	0	0.0528399	inf	1	no	0	0	0	1	no	#NAME?	0	#VALUE!	0	no	no	no	no
ENSDARG00000088682	ENSDARG00000088682	si:dkey-192d15.3	chr7:3796570-3803479	0.00717226	0	#NAME?	1	no	0.0105328	0	#NAME?	1	no	0.00941134	0.00913385	-0.0431759	1	no	0	0	0	1	no	#NAME?	#NAME?	0.0431759	0	no	no	no	no
ENSDARG00000091615	ENSDARG00000091615	si:dkey-192o1.3	chr14:43496141-43497000	0	0.0135847	inf	1	no	0	0.06303	inf	1	no	0	0	0	1	no	0.0465258	0.0137742	-1.75606	1	no	#VALUE!	#VALUE!	0	1.75606	no	no	no	no
ENSDARG00000095356	ENSDARG00000095356	si:dkey-193i10.6	chr4:51664265-51685174	0.000242881	0	#NAME?	1	no	0.00714847	0.0376871	2.39836	1	no	0.00638796	0.000266916	-4.5809	1	no	0.0278189	0	#NAME?	1	no	#NAME?	-2.39836	4.5809	#NAME?	no	no	no	no
ENSDARG00000095153	ENSDARG00000095153	si:dkey-193i10.7	chr4:51726064-51733779	0.00601508	0	#NAME?	1	no	0	0	0	1	no	0	0.00766019	inf	1	no	0	0	0	1	no	#NAME?	0	#VALUE!	0	no	no	no	no
ENSDARG00000095929	ENSDARG00000095929	si:dkey-193l3.7	chr8:28919005-29089412	0.353129	0	#NAME?	1	no	0	0.338232	inf	1	no	0	0.444563	inf	1	no	0.248943	0	#NAME?	1	no	#NAME?	#VALUE!	#VALUE!	#NAME?	no	no	no	no
ENSDARG00000091688	ENSDARG00000091688	si:dkey-195o9.2	chr3:9544447-9564878	0	0.010448	inf	1	no	0.0390041	0.0436398	0.162018	1	no	0.0348524	0	#NAME?	1	no	0.0321193	0.0106826	-1.58817	1	no	#VALUE!	-0.162018	#NAME?	1.58817	no	no	no	no
ENSDARG00000093267	ENSDARG00000093267	si:dkey-196h17.4	chr13:6751483-6755925	0.0181517	0	#NAME?	1	no	0.0191803	0.0086348	-1.15139	1	no	0.0862146	0.0229185	-1.91142	1	no	0.00635532	0.00581795	-0.127452	1	no	#NAME?	1.15139	1.91142	0.127452	no	no	no	no
ENSDARG00000092692	ENSDARG00000092692	si:dkey-197d18.1	chr20:43463100-43493916	0	0.00538659	inf	1	no	0	0	0	1	no	0	0	0	1	no	0	0.00546175	inf	1	no	#VALUE!	0	0	#VALUE!	no	no	no	no
ENSDARG00000078368	ENSDARG00000078368	si:dkey-199f5.4	chr16:44609470-44610765	0.00672334	0	#NAME?	1	no	0.00947973	0	#NAME?	1	no	0.00847121	0.00846418	-0.00119725	1	no	0	0	0	1	no	#NAME?	#NAME?	0.00119725	0	no	no	no	no
ENSDARG00000096088	ENSDARG00000096088	si:dkey-199m13.9	chr4:35668999-35669695	0	0.274169	inf	1	no	0	0	0	1	no	0	0	0	1	no	0	0.280326	inf	1	no	#VALUE!	0	0	#VALUE!	no	no	no	no
ENSDARG00000093852	ENSDARG00000093852	si:dkey-19a16.1	chr22:5990073-5990954	0	0.0433181	inf	1	no	0.097379	0	#NAME?	1	no	0.087015	0	#NAME?	1	no	0	0.0441759	inf	1	no	#VALUE!	#NAME?	#NAME?	#VALUE!	no	no	no	no
ENSDARG00000095195	ENSDARG00000095195	si:dkey-19a16.11	chr22:6122828-6123798	0.022327	0	#NAME?	1	no	0	0	0	1	no	0	0.0282491	inf	1	no	0	0	0	1	no	#NAME?	0	#VALUE!	0	no	no	no	no
ENSDARG00000096133	ENSDARG00000096133	si:dkey-19h16.8	chr4:29810814-29822914	0	0.0683093	inf	1	no	0.0280004	0.419437	3.90494	1	no	0.0250215	0	#NAME?	1	no	0.309202	0.0698432	-2.14636	1	no	#VALUE!	-3.90494	#NAME?	2.14636	no	no	no	no
ENSDARG00000094866	ENSDARG00000094866	si:dkey-19p15.5	chr13:8415364-8665656	0.00496719	0	#NAME?	1	no	0	0	0	1	no	0	0.00625333	inf	1	no	0	0	0	1	no	#NAME?	0	#VALUE!	0	no	no	no	no
ENSDARG00000093559	ENSDARG00000093559	si:dkey-1b17.9	chr22:2850881-2965127	1.25243	0	#NAME?	1	no	0.602307	0	#NAME?	1	no	0.538229	1.59497	1.56724	1	no	0	0	0	1	no	#NAME?	#NAME?	-1.56724	0	no	no	no	no
ENSDARG00000074334	ENSDARG00000074334	si:dkey-1c7.1	chr1:58441848-58449718	0.0271143	0	#NAME?	1	no	0.0209944	0.011457	-0.873777	1	no	0.0187608	0.034171	0.865047	1	no	0.00845675	0	#NAME?	1	no	#NAME?	0.873777	-0.865047	#NAME?	no	no	no	no
ENSDARG00000093175	ENSDARG00000093175	si:dkey-1p9.5	chr2:18448330-18468279	0.0117239	0	#NAME?	1	no	0	0	0	1	no	0	0.0149303	inf	1	no	0	0	0	1	no	#NAME?	0	#VALUE!	0	no	no	no	no
ENSDARG00000092135	ENSDARG00000092135	si:dkey-204f11.66	chr3:34163495-34164466	0.0171027	0	#NAME?	1	no	0.027551	0	#NAME?	1	no	0.0246176	0.0214843	-0.196409	1	no	0	0	0	1	no	#NAME?	#NAME?	0.196409	0	no	no	no	no
ENSDARG00000095374	ENSDARG00000095374	si:dkey-204h11.10	chr4:60640078-60646128	0.0264949	0	#NAME?	1	no	0.168849	0	#NAME?	1	no	0.15088	0.0332828	-2.18056	1	no	0	0	0	1	no	#NAME?	#NAME?	2.18056	0	no	no	no	no
ENSDARG00000093742	ENSDARG00000093742	si:dkey-206d17.11	chr19:2841805-2843031	0	0.0268161	inf	1	no	0.0304086	0.0489132	0.685746	1	no	0.0271709	0	#NAME?	1	no	0.0361055	0.0273472	-0.400825	1	no	#VALUE!	-0.685746	#NAME?	0.400825	no	no	no	no
ENSDARG00000093853	ENSDARG00000093853	si:dkey-207j16.7	chr4:9838103-9839848	0	0.0430869	inf	1	no	0.0480003	0	#NAME?	1	no	0.0428937	0	#NAME?	1	no	0	0.0439402	inf	1	no	#VALUE!	#NAME?	#NAME?	#VALUE!	no	no	no	no
ENSDARG00000095994	ENSDARG00000095994	si:dkey-207j16.9	chr4:9877784-9900144	0	0.0999969	inf	1	no	0.342209	0.474787	0.472401	1	no	0.305789	0	#NAME?	1	no	0.349849	0.101867	-1.78005	1	no	#VALUE!	-0.472401	#NAME?	1.78005	no	no	no	no
ENSDARG00000040022	ENSDARG00000040022	si:dkey-208k4.2	chr19:18002297-18005293	0	0.0422602	inf	1	no	0.0156994	0.0252542	0.685816	1	no	0.0140279	0	#NAME?	1	no	0.0186415	0.0430871	1.20874	1	no	#VALUE!	-0.685816	#NAME?	-1.20874	no	no	no	no
ENSDARG00000092326	ENSDARG00000092326	si:dkey-208k4.7	chr19:18060780-18073596	0	0.0342689	inf	1	no	0	0	0	1	no	0	0	0	1	no	0	0.0349475	inf	1	no	#VALUE!	0	0	#VALUE!	no	no	no	no
ENSDARG00000095914	ENSDARG00000095914	si:dkey-209n16.2	chr6:31464351-31680110	0.0344274	0	#NAME?	1	no	0.583804	1.17611	1.01047	1	no	0.521688	0.0433415	-3.58937	1	no	0.866736	0	#NAME?	1	no	#NAME?	-1.01047	3.58937	#NAME?	no	no	no	no
ENSDARG00000086021	ENSDARG00000086021	si:dkey-20l4.2	chr12:2978867-2986638	0	0.00572127	inf	1	no	0.167818	0.112188	-0.580973	1	no	0.149959	0	#NAME?	1	no	0.0826897	0.00583457	-3.82501	1	no	#VALUE!	0.580973	#NAME?	3.82501	no	no	no	no
ENSDARG00000094220	ENSDARG00000094220	si:dkey-211e20.8	chr22:39721701-40017756	0.0092249	0	#NAME?	1	no	0	0	0	1	no	0	0.0117479	inf	1	no	0	0	0	1	no	#NAME?	0	#VALUE!	0	no	no	no	no
ENSDARG00000036728	ENSDARG00000036728	si:dkey-211g8.1	chr19:11156497-11159896	0.00676452	0	#NAME?	1	no	0.0432112	0	#NAME?	1	no	0.0386122	0.00849789	-2.18388	1	no	0	0	0	1	no	#NAME?	#NAME?	2.18388	0	no	no	no	no
ENSDARG00000058535	ENSDARG00000058535	si:dkey-211g8.7	chr19:11246489-11249598	0.00383236	0	#NAME?	1	no	0	0.0181056	inf	1	no	0	0.0048805	inf	1	no	0.0133647	0	#NAME?	1	no	#NAME?	#VALUE!	#VALUE!	#NAME?	no	no	no	no
ENSDARG00000096475	ENSDARG00000096475	si:dkey-211i20.5	chr4:49946011-49955503	0.0687811	0	#NAME?	1	no	0	0	0	1	no	0	0.0870856	inf	1	no	0	0	0	1	no	#NAME?	0	#VALUE!	0	no	no	no	no
ENSDARG00000094401	ENSDARG00000094401	si:dkey-216e24.5	chr9:34280509-34284314	0	0.0181788	inf	1	no	0	0	0	1	no	0	0	0	1	no	0	0.0185388	inf	1	no	#VALUE!	0	0	#VALUE!	no	no	no	no
ENSDARG00000092331	ENSDARG00000092331	si:dkey-217m5.9	chr20:39419015-39520827	0	0.00972666	inf	1	no	0.0123495	0	#NAME?	1	no	0.0110347	0	#NAME?	1	no	0	0.00989423	inf	1	no	#VALUE!	#NAME?	#NAME?	#VALUE!	no	no	no	no
ENSDARG00000075929	ENSDARG00000075929	si:dkey-219c10.4	chr9:39193219-39209203	0.00946658	0	#NAME?	1	no	0.786129	0.756927	-0.0546117	1	no	0.702472	0.0119177	-5.88126	1	no	0.558373	0	#NAME?	1	no	#NAME?	0.0546117	5.88126	#NAME?	no	no	no	no
ENSDARG00000096595	ENSDARG00000096595	si:dkey-219e20.3	chr20:21138259-21149729	0.0157524	0	#NAME?	1	no	0.0227265	0	#NAME?	1	no	0.0203086	0.0200606	-0.0177271	1	no	0	0	0	1	no	#NAME?	#NAME?	0.0177271	0	no	no	no	no
ENSDARG00000095729	ENSDARG00000095729	si:dkey-21e2.12	chr22:19585323-19586609	0.0110646	0	#NAME?	1	no	0	0	0	1	no	0	0.0138994	inf	1	no	0	0	0	1	no	#NAME?	0	#VALUE!	0	no	no	no	no
ENSDARG00000092532	ENSDARG00000092532	si:dkey-21e2.4	chr22:19507190-19508476	0.00965508	0	#NAME?	1	no	0	0.0445788	inf	1	no	0	0.012155	inf	1	no	0.032906	0	#NAME?	1	no	#NAME?	#VALUE!	#VALUE!	#NAME?	no	no	no	no
ENSDARG00000094603	ENSDARG00000094603	si:dkey-21h14.12	chr4:10148732-10163063	0.00222454	0	#NAME?	1	no	0.00331747	0.00271587	-0.288671	1	no	0.00296453	0.00279766	-0.083583	1	no	0.00200473	0	#NAME?	1	no	#NAME?	0.288671	0.083583	#NAME?	no	no	no	no
ENSDARG00000096184	ENSDARG00000096184	si:dkey-21h14.14	chr4:10135387-10142396	0.00634412	0	#NAME?	1	no	0.00901326	0.0130829	0.537566	1	no	0.00805436	0.00801712	-0.00668618	1	no	0.00963973	0	#NAME?	1	no	#NAME?	-0.537566	0.00668618	#NAME?	no	no	no	no
ENSDARG00000096153	ENSDARG00000096153	si:dkey-21h14.9	chr4:10189136-10197141	0	0.00233925	inf	1	no	0.00761868	0.00450312	-0.758617	1	no	0.00680815	0	#NAME?	1	no	0.00331435	0.00237189	-0.482688	1	no	#VALUE!	0.758617	#NAME?	0.482688	no	no	no	no
ENSDARG00000094213	ENSDARG00000094213	si:dkey-21o13.3	chr9:35820163-35823108	0	0.0832239	inf	1	no	0	0	0	1	no	0	0	0	1	no	0	0.0843851	inf	1	no	#VALUE!	0	0	#VALUE!	no	no	no	no
ENSDARG00000094118	ENSDARG00000094118	si:dkey-21o22.2	chr4:18196156-18199301	0.0106073	0	#NAME?	1	no	0.0170875	0	#NAME?	1	no	0.0152682	0.0133249	-0.196409	1	no	0	0	0	1	no	#NAME?	#NAME?	0.196409	0	no	no	no	no
ENSDARG00000095276	ENSDARG00000095276	si:dkey-221j11.1	chr13:43250740-43270620	0.451471	0	#NAME?	1	no	0.325824	0.26205	-0.314254	1	no	0.291134	0.569984	0.969241	1	no	0.193433	0	#NAME?	1	no	#NAME?	0.314254	-0.969241	#NAME?	no	no	no	no
ENSDARG00000094457	ENSDARG00000094457	si:dkey-222f8.6	chr4:10878301-11071928	0	0.0047796	inf	1	no	0.0054199	0	#NAME?	1	no	0.00484284	0	#NAME?	1	no	0	0.00487425	inf	1	no	#VALUE!	#NAME?	#NAME?	#VALUE!	no	no	no	no
ENSDARG00000092941	ENSDARG00000092941	si:dkey-222h21.3	chr1:59010349-59013620	0.00702819	0	#NAME?	1	no	0.0245646	0.011404	-1.10705	1	no	0.0219503	0.0089123	-1.30037	1	no	0.00841787	0	#NAME?	1	no	#NAME?	1.10705	1.30037	#NAME?	no	no	no	no
ENSDARG00000094083	ENSDARG00000094083	si:dkey-223d7.6	chr2:24927930-24928898	0.0167319	0	#NAME?	1	no	0	0	0	1	no	0	0.021308	inf	1	no	0	0	0	1	no	#NAME?	0	#VALUE!	0	no	no	no	no
ENSDARG00000091372	ENSDARG00000091372	si:dkey-224b4.1	chr24:38522345-38682990	0.0289127	0	#NAME?	1	no	0.0359631	0.0337133	-0.093199	1	no	0.0321341	0.036399	0.179794	1	no	0.0248144	0	#NAME?	1	no	#NAME?	0.093199	-0.179794	#NAME?	no	no	no	no
ENSDARG00000092066	ENSDARG00000092066	si:dkey-228i19.34	chr2:13915647-14057782	0.0427346	0	#NAME?	1	no	0.016804	0.054057	1.68567	1	no	0.0150149	0.053881	1.84338	1	no	0.0399024	0	#NAME?	1	no	#NAME?	-1.68567	-1.84338	#NAME?	no	no	no	no
ENSDARG00000095684	ENSDARG00000095684	si:dkey-229d2.6	chr5:27230417-27234100	0.0422639	0	#NAME?	1	no	0.194505	0.107807	-0.851352	1	no	0.173801	0.0538229	-1.69115	1	no	0.0795784	0	#NAME?	1	no	#NAME?	0.851352	1.69115	#NAME?	no	no	no	no
ENSDARG00000091176	ENSDARG00000091176	si:dkey-22h13.1	chr4:33881436-33888021	0	0.00303308	inf	1	no	0	0	0	1	no	0	0	0	1	no	0	0.00310119	inf	1	no	#VALUE!	0	0	#VALUE!	no	no	no	no
ENSDARG00000096486	ENSDARG00000096486	si:dkey-22h13.7	chr4:34151400-34171090	6.01942e-07	0	#NAME?	1	no	0	0	0	1	no	0	4.78338e-07	inf	1	no	0	0	0	1	no	#NAME?	0	#VALUE!	0	no	no	no	no
ENSDARG00000094354	ENSDARG00000094354	si:dkey-233e3.1	chr4:38471595-38475441	0	0.0111726	inf	1	no	0.0829263	0.0411615	-1.01053	1	no	0.0741016	0	#NAME?	1	no	0.0303435	0.0114235	-1.40939	1	no	#VALUE!	1.01053	#NAME?	1.40939	no	no	no	no
ENSDARG00000096176	ENSDARG00000096176	si:dkey-233e3.6	chr4:38616139-38627960	0	0.0262315	inf	1	no	0.0711136	0.0546509	-0.37988	1	no	0.0635446	0	#NAME?	1	no	0.0402237	0.0267727	-0.587285	1	no	#VALUE!	0.37988	#NAME?	0.587285	no	no	no	no
ENSDARG00000093942	ENSDARG00000093942	si:dkey-233h12.3	chr23:20222451-20241639	0	0.0151262	inf	1	no	0	0	0	1	no	0	0	0	1	no	0	0.0154659	inf	1	no	#VALUE!	0	0	#VALUE!	no	no	no	no
ENSDARG00000092409	ENSDARG00000092409	si:dkey-234l24.7	chr4:13231820-13257033	0	0.0334766	inf	1	no	0	0	0	1	no	0	0	0	1	no	0	0.0342284	inf	1	no	#VALUE!	0	0	#VALUE!	no	no	no	no
ENSDARG00000094329	ENSDARG00000094329	si:dkey-234l24.7	chr4:13224099-13227106	0.0260121	0	#NAME?	1	no	0	0	0	1	no	0	0.0326763	inf	1	no	0	0	0	1	no	#NAME?	0	#VALUE!	0	no	no	no	no
ENSDARG00000057253	ENSDARG00000057253	si:dkey-236a14.13	chr2:18556678-18564712	0	0.0226126	inf	1	no	0.0125954	0	#NAME?	1	no	0.0112554	0	#NAME?	1	no	0	0.0230604	inf	1	no	#VALUE!	#NAME?	#NAME?	#VALUE!	no	no	no	no
ENSDARG00000094293	ENSDARG00000094293	si:dkey-237i9.7	chr6:19617981-19659252	0	0.0184724	inf	1	no	0	0	0	1	no	0	0	0	1	no	0	0.0188382	inf	1	no	#VALUE!	0	0	#VALUE!	no	no	no	no
ENSDARG00000093512	ENSDARG00000093512	si:dkey-238j22.1	chr5:35106757-35109833	0	0.0136731	inf	1	no	0	0	0	1	no	0	0	0	1	no	0	0.0138639	inf	1	no	#VALUE!	0	0	#VALUE!	no	no	no	no
[truncated: 30,764 more rows]
