# Supplementary material for: Microbiota regulate intestinal epithelial gene expression by suppressing the transcription factor Hepatocyte nuclear factor 4 alpha
Source: Genome Res. 2017 Jul;27(7):1195–206. doi: 10.1101/gr.220111.116 (PMC5495071; doi:10.1101/gr.220111.116)
Supplement: Supplemental Material [file supp_gr.220111.116_Supplemental_Table_S3.xlsx]

## Sheet: Supplemental Table S3
Supplemental Table S3: Cuffdiff results from gnotobiotic mouse jejunal IEC RNA-seq (Related to Fig. 3, Fig. 4, and Supplemental Fig. S4, and Supplemental Fig. S6)
gene_id	gene	locus	status	CV Jej IEC	GF Jej IEC	GF/CV log2(fold_change)	test_stat	p_value	q_value	significant	CV/GF log2(fold_change)
ENSMUSG00000000266	Mid2	chrX:137199137-137302254	OK	6.07053	3.7667	-0.688522	-2.38402	0.0004	0.0146976	yes	0.688522
ENSMUSG00000000394	Gcg	chr2:62312586-62321707	OK	18.7994	11.3508	-0.72789	-2.30669	0.0008	0.0256056	yes	0.72789
ENSMUSG00000000805	Car4	chr11:84771287-84779546	OK	48.7547	99.6444	1.03125	3.58271	5e-05	0.00246935	yes	-1.03125
ENSMUSG00000001436	Slc19a1	chr10:76494985-76629293	OK	6.0026	2.66318	-1.17244	-2.99879	5e-05	0.00246935	yes	1.17244
ENSMUSG00000001467	Cyp51	chr5:4081144-4104746	OK	16.1556	25.4971	0.658298	2.42227	0.00035	0.0131766	yes	-0.658298
ENSMUSG00000002227	Mov10	chr3:104597753-104621481	OK	34.8195	18.6586	-0.900055	-3.28467	5e-05	0.00246935	yes	0.900055
ENSMUSG00000002228	Ppm1j	chr3:104570323-104588936	OK	11.6994	19.6503	0.748124	2.69918	0.00015	0.00632064	yes	-0.748124
ENSMUSG00000002250	Ppard	chr17:28369698-28438414	OK	43.7733	24.1176	-0.859967	-2.81985	5e-05	0.00246935	yes	0.859967
ENSMUSG00000002289	Angptl4	chr17:33910694-33918520	OK	35.3933	83.6895	1.24157	4.34297	5e-05	0.00246935	yes	-1.24157
ENSMUSG00000002384	Bmp8b	chr4:122782407-122817194	OK	3.3496	7.337	1.1312	3.3195	5e-05	0.00246935	yes	-1.1312
ENSMUSG00000002475	Abhd3	chr18:10644408-10706769	OK	74.3062	45.6743	-0.702101	-2.48022	0.00045	0.0160221	yes	0.702101
ENSMUSG00000002565	Scin	chr12:40786355-40860815	OK	46.0599	75.8285	0.719228	2.69271	0.00015	0.00632064	yes	-0.719228
ENSMUSG00000002944	Cd36	chr5:17287507-17394777	OK	99.7795	155.685	0.641817	2.43924	0.0006	0.0204133	yes	-0.641817
ENSMUSG00000002992	Apoc2	chr7:20256927-20266772	OK	1420.2	693.294	-1.03455	-3.90102	5e-05	0.00246935	yes	1.03455
ENSMUSG00000003053	Cyp2c29	chr19:39303743-39405203	OK	18.3977	88.6831	2.26913	8.30498	5e-05	0.00246935	yes	-2.26913
ENSMUSG00000003283	Hck	chr2:152934203-152977177	OK	3.61506	10.2579	1.50464	4.95928	5e-05	0.00246935	yes	-1.50464
ENSMUSG00000003420	Fcgrt	chr7:52348362-52359192	OK	47.9783	21.5577	-1.15418	-4.41567	5e-05	0.00246935	yes	1.15418
ENSMUSG00000004814	Ccl24	chr5:136045806-136048913	OK	7.84605	3.33022	-1.23635	-3.41556	5e-05	0.00246935	yes	1.23635
ENSMUSG00000004933	Matk	chr10:80715679-80726110	OK	1.78611	4.11407	1.20375	2.97931	0.0001	0.00457015	yes	-1.20375
ENSMUSG00000005125	Ndrg1	chr15:66760882-66844601	OK	22.7686	84.0591	1.88436	6.73399	5e-05	0.00246935	yes	-1.88436
ENSMUSG00000005615	Pcyt1a	chr16:32431006-32475156	OK	113.881	74.815	-0.606131	-2.13748	0.0012	0.0354444	yes	0.606131
ENSMUSG00000005873	Reep5	chr18:34504542-34533069	OK	1.94529	4.02982	1.05073	3.03831	0.0001	0.00457015	yes	-1.05073
ENSMUSG00000007987	Rabl5	chr5:137384019-137389114	OK	12.6974	6.97289	-0.864698	-2.71956	0.00015	0.00632064	yes	0.864698
ENSMUSG00000008193	Spib	chr7:51781364-51787441	OK	1.67699	3.59444	1.09989	3.25468	5e-05	0.00246935	yes	-1.09989
ENSMUSG00000008305	Tle1	chr4:71778175-71861953	OK	11.8446	23.557	0.991929	2.54058	0.00045	0.0160221	yes	-0.991929
ENSMUSG00000008540	Mgst1	chr6:138088836-138105276	OK	278.746	484.863	0.798622	3.00091	5e-05	0.00246935	yes	-0.798622
ENSMUSG00000009246	Trpm5	chr7:150255057-150280547	OK	3.05488	6.45297	1.07885	2.37753	0.0009	0.0280251	yes	-1.07885
ENSMUSG00000010122	Slc47a1	chr11:61156901-61191847	OK	26.4154	46.7519	0.823646	2.43356	0.0004	0.0146976	yes	-0.823646
ENSMUSG00000011034	Slc5a1	chr5:33446867-33505521	OK	1141.21	692.946	-0.71975	-2.34814	0.00045	0.0160221	yes	0.71975
ENSMUSG00000013643	2210415F13Rik	chr11:58192544-58204230	OK	1995.34	807.145	-1.30573	-4.64337	5e-05	0.00246935	yes	1.30573
ENSMUSG00000015243	Abca1	chr4:53043658-53172767	OK	11.8806	7.50365	-0.662948	-2.388	0.00035	0.0131766	yes	0.662948
ENSMUSG00000015396	Cd83	chr13:43880475-43898499	OK	1.35269	2.91631	1.10832	2.71084	0.0002	0.0081292	yes	-1.10832
ENSMUSG00000017386	Traf4	chr11:77972000-77979091	OK	8.03988	14.1685	0.817439	2.70949	5e-05	0.00246935	yes	-0.817439
ENSMUSG00000017607	Tns4	chr11:98926991-98950620	OK	4.43324	2.18977	-1.01758	-3.22862	5e-05	0.00246935	yes	1.01758
ENSMUSG00000017713	Tha1	chr11:117729265-117748730	OK	7.61435	4.23129	-0.847624	-2.39432	0.0013	0.0379105	yes	0.847624
ENSMUSG00000018217	Pmp22	chr11:62942483-62973049	OK	277.584	537.787	0.954112	3.54657	5e-05	0.00246935	yes	-0.954112
ENSMUSG00000018427	Ypel2	chr11:86749926-86807209	OK	17.9509	27.162	0.597536	2.24974	0.00135	0.039244	yes	-0.597536
ENSMUSG00000018623	Mmp7	chr9:7628230-7699585	OK	11.7434	5.50597	-1.09279	-3.09012	5e-05	0.00246935	yes	1.09279
ENSMUSG00000019872	Smpdl3a	chr10:57514140-57531636	OK	110.612	50.3738	-1.13476	-4.24403	5e-05	0.00246935	yes	1.13476
ENSMUSG00000019960	Dusp6	chr10:98725864-98730122	OK	53.1576	97.7838	0.879321	3.35807	5e-05	0.00246935	yes	-0.879321
ENSMUSG00000019970	Sgk1	chr10:21601989-21719709	OK	240.898	489.892	1.02404	3.41403	5e-05	0.00246935	yes	-1.02404
ENSMUSG00000020062	Slc5a8	chr10:88348736-88392250	OK	56.4578	35.6026	-0.665192	-2.53737	0.00045	0.0160221	yes	0.665192
ENSMUSG00000020098	Pcbd1	chr10:60552090-60557076	OK	19.4071	31.1061	0.680611	2.36946	0.00075	0.0242588	yes	-0.680611
ENSMUSG00000020108	Ddit4	chr10:59412422-59414518	OK	5.49187	11.1885	1.02664	3.47689	5e-05	0.00246935	yes	-1.02664
ENSMUSG00000020205	Phlda1	chr10:110943341-110945705	OK	4.22253	7.19708	0.769305	2.40567	0.0007	0.022965	yes	-0.769305
ENSMUSG00000020226	Slc5a4b	chr10:75520238-75573706	OK	56.5503	114.765	1.02108	3.84309	5e-05	0.00246935	yes	-1.02108
ENSMUSG00000020229	Slc5a4a	chr10:75610195-75652010	OK	34.4597	52.7729	0.614889	2.27006	0.00095	0.029089	yes	-0.614889
ENSMUSG00000020261	Slc36a1	chr11:55017851-55049832	OK	52.426	29.4351	-0.832746	-2.83195	0.00015	0.00632064	yes	0.832746
ENSMUSG00000020405	Fabp6	chr11:43409550-43415042	OK	138.68	418.383	1.59306	5.95183	5e-05	0.00246935	yes	-1.59306
ENSMUSG00000020604	Arsg	chr11:109287259-109434644	OK	15.701	4.39824	-1.83586	-2.42594	0.00115	0.0344101	yes	1.83586
ENSMUSG00000020641	Rsad2	chr12:27127617-27141317	OK	9.98688	6.07555	-0.717019	-2.51761	0.0005	0.0173977	yes	0.717019
ENSMUSG00000020682	Mmp28	chr11:83251187-83276573	OK	4.28344	1.52616	-1.48886	-3.81355	5e-05	0.00246935	yes	1.48886
ENSMUSG00000020814	Mxra7	chr11:116664375-116689360	OK	3.3492	1.56275	-1.09973	-2.75087	0.0004	0.0146976	yes	1.09973
ENSMUSG00000020826	Nos2	chr11:78734288-78773756	OK	60.9554	4.80734	-3.66444	-12.7621	5e-05	0.00246935	yes	3.66444
ENSMUSG00000020829	Slc46a1	chr11:78279198-78285447	OK	105.418	63.0301	-0.742007	-2.8683	0.0002	0.0081292	yes	0.742007
ENSMUSG00000020865	Abcc3	chr11:94204611-94254311	OK	26.7789	9.55139	-1.48731	-3.76077	5e-05	0.00246935	yes	1.48731
ENSMUSG00000021025	Nfkbia	chr12:56590397-56593634	OK	74.0755	45.9087	-0.690228	-2.59783	0.00015	0.00632064	yes	0.690228
ENSMUSG00000021187	Tc2n	chr12:102883652-102956733	OK	6.31493	3.30914	-0.932311	-2.7944	0.0002	0.0081292	yes	0.932311
ENSMUSG00000021211	Akr1c12	chr13:4267417-4278679	OK	12.3511	28.8164	1.22226	4.24768	5e-05	0.00246935	yes	-1.22226
ENSMUSG00000021213	Akr1c13	chr13:4190429-4204842	OK	8.15085	45.0531	2.4666	8.17324	5e-05	0.00246935	yes	-2.4666
ENSMUSG00000021280	1200009I06Rik	chr12:112655227-112669393	OK	108.334	70.7	-0.6157	-2.28852	0.0008	0.0256056	yes	0.6157
ENSMUSG00000021477	Ctsl	chr13:64464521-64471614	OK	25.3194	8.61889	-1.55467	-4.90582	5e-05	0.00246935	yes	1.55467
ENSMUSG00000021539	Lect2	chr13:56643820-56649899	OK	4.42424	1.71972	-1.36325	-3.00172	0.0003	0.0116278	yes	1.36325
ENSMUSG00000021640	Naip1	chr13:101177724-101216361	OK	19.294	9.04764	-1.09254	-4.03518	5e-05	0.00246935	yes	1.09254
ENSMUSG00000021687	Scamp1	chr13:94971264-95055812	OK	35.9819	23.6321	-0.606522	-2.21983	0.00155	0.0442183	yes	0.606522
ENSMUSG00000022197	Pdzd2	chr15:12286808-12669679	OK	2.9441	1.65527	-0.830759	-2.74152	5e-05	0.00246935	yes	0.830759
ENSMUSG00000022358	Fbxo32	chr15:58011633-58155724	OK	4.47862	2.70109	-0.729513	-2.28762	0.00125	0.0366853	yes	0.729513
ENSMUSG00000022383	Ppara	chr15:85565412-85633249	OK	7.05128	11.8698	0.751335	1.92781	0.001	0.0304172	yes	-0.751335
ENSMUSG00000022474	Pmm1	chr15:81781537-81791360	OK	1.93314	4.03863	1.06292	2.58256	0.00025	0.00989871	yes	-1.06292
ENSMUSG00000022540	Rogdi	chr16:5008822-5013620	OK	8.00723	13.0168	0.700995	2.32221	0.0011	0.0333485	yes	-0.700995
ENSMUSG00000022587	Ly6e	chr15:74785480-74790335	OK	35.1834	18.2333	-0.948315	-3.53324	5e-05	0.00246935	yes	0.948315
ENSMUSG00000022791	Tnk2	chr16:32643959-32683579	OK	7.6568	4.21954	-0.859657	-2.30715	0.00055	0.0189225	yes	0.859657
ENSMUSG00000022793	B4galt4	chr16:38742376-38769162	OK	26.8185	16.5723	-0.694455	-2.31571	0.00125	0.0366853	yes	0.694455
ENSMUSG00000022797	Tfrc	chr16:32609005-32632880	OK	31.1278	73.4828	1.2392	4.13257	5e-05	0.00246935	yes	-1.2392
ENSMUSG00000022857	Tmprss15	chr16:78953252-79091342	OK	16.5104	9.57272	-0.786374	-2.57438	0.00015	0.00632064	yes	0.786374
ENSMUSG00000022912	Pros1	chr16:62854132-62929172	OK	3.9743	15.1489	1.93043	6.36444	5e-05	0.00246935	yes	-1.93043
ENSMUSG00000023073	Slc10a2	chr8:5085622-5105232	OK	5.62847	13.5735	1.26998	3.97593	5e-05	0.00246935	yes	-1.26998
ENSMUSG00000023087	Ccrn4l	chr3:51028368-51055566	OK	22.2973	43.4632	0.96293	3.30759	5e-05	0.00246935	yes	-0.96293
ENSMUSG00000023169	Slc38a1	chr15:96401848-96473344	OK	4.52623	2.68595	-0.752879	-2.65197	5e-05	0.00246935	yes	0.752879
ENSMUSG00000023247	Guca2a	chr4:119310308-119312076	OK	279.263	559.582	1.00272	3.81982	5e-05	0.00246935	yes	-1.00272
ENSMUSG00000023452	Pisd	chr5:33078948-33196905	OK	46.8247	84.4331	0.850538	2.64771	0.00015	0.00632064	yes	-0.850538
ENSMUSG00000023915	Tnfrsf21	chr17:43153503-43226137	OK	2.58895	7.48514	1.53166	5.05615	5e-05	0.00246935	yes	-1.53166
ENSMUSG00000024124	Prss30	chr17:24109092-24112197	OK	91.8414	51.5514	-0.833133	-3.00251	5e-05	0.00246935	yes	0.833133
ENSMUSG00000024222	Fkbp5	chr17:28536039-28654469	OK	1.32236	8.282	2.64686	7.37187	5e-05	0.00246935	yes	-2.64686
ENSMUSG00000024807	Syvn1	chr19:6046575-6057758	OK	23.2516	38.7499	0.73686	2.47561	0.00055	0.0189225	yes	-0.73686
ENSMUSG00000025010	Ccnj	chr19:40905768-40923062	OK	2.11529	4.48504	1.08426	3.47275	5e-05	0.00246935	yes	-1.08426
ENSMUSG00000025091	Pnliprp2	chr19:58834212-58852023	OK	7.29217	17.5122	1.26394	4.26605	5e-05	0.00246935	yes	-1.26394
ENSMUSG00000025203	Scd2	chr19:44368165-44381354	OK	5.19622	23.4594	2.17463	7.79326	5e-05	0.00246935	yes	-2.17463
ENSMUSG00000025225	Nfkb2	chr19:46379226-46401646	OK	13.2652	8.37188	-0.664026	-2.22479	0.0016	0.0449468	yes	0.664026
ENSMUSG00000025290	Rps24	chr14:25309902-25315368	OK	10.6921	19.7831	0.887719	2.36331	0.0014	0.0405691	yes	-0.887719
ENSMUSG00000025347	Mettl7b	chr10:128370868-128398044	OK	58.6194	38.0941	-0.621813	-2.30992	0.0012	0.0354444	yes	0.621813
ENSMUSG00000025432	Avil	chr10:126437764-126467896	OK	1.88042	4.98583	1.40678	2.52838	5e-05	0.00246935	yes	-1.40678
ENSMUSG00000025701	Alox5	chr6:116360094-116411196	OK	1.15502	3.05347	1.40254	2.48872	0.00035	0.0131766	yes	-1.40254
ENSMUSG00000025726	Slc28a1	chr7:88259684-88315302	OK	31.6727	79.4354	1.32654	4.87967	5e-05	0.00246935	yes	-1.32654
ENSMUSG00000026166	Ccl20	chr1:83113340-83115742	OK	5.39818	2.19025	-1.30137	-2.77374	0.00065	0.0217124	yes	1.30137
ENSMUSG00000026170	Cyp27a1	chr1:74760147-74784464	OK	41.8672	65.8311	0.652951	2.44403	0.0004	0.0146976	yes	-0.652951
ENSMUSG00000026321	Tnfrsf11a	chr1:107677299-107744558	OK	25.398	12.7681	-0.992169	-3.74404	5e-05	0.00246935	yes	0.992169
ENSMUSG00000026417	Pigr	chr1:132723260-132748826	OK	2264.32	1151.71	-0.975296	-2.86316	5e-05	0.00246935	yes	0.975296
ENSMUSG00000026586	Prrx1	chr1:165175246-165243841	OK	11.6689	6.44928	-0.855458	-2.33011	0.0007	0.022965	yes	0.855458
ENSMUSG00000027068	Dhrs9	chr2:69218501-69242590	OK	1.54051	3.03223	0.976971	2.87345	5e-05	0.00246935	yes	-0.976971
ENSMUSG00000027200	Sema6d	chr2:123915704-124493506	OK	19.8184	11.1882	-0.824862	-3.06584	5e-05	0.00246935	yes	0.824862
ENSMUSG00000027253	Lrp4	chr2:91297667-91354058	OK	8.57664	5.35056	-0.680722	-2.47566	0.0005	0.0173977	yes	0.680722
ENSMUSG00000027309	4930402H24Rik	chr2:130531935-130732142	OK	7.29389	3.04514	-1.26018	-2.21981	5e-05	0.00246935	yes	1.26018
ENSMUSG00000027312	Atrn	chr2:130732230-130856069	OK	11.5719	7.5169	-0.62241	-2.08662	0.00085	0.0267401	yes	0.62241
ENSMUSG00000027513	Pck1	chr2:172978548-172984774	OK	123.197	210.641	0.773811	2.72319	0.0001	0.00457015	yes	-0.773811
ENSMUSG00000027514	Zbp1	chr2:173032112-173044424	OK	53.936	22.1427	-1.28441	-3.92896	5e-05	0.00246935	yes	1.28441
ENSMUSG00000027562	Car2	chr3:14886425-14900769	OK	32.1885	17.6093	-0.870211	-3.15121	5e-05	0.00246935	yes	0.870211
ENSMUSG00000027580	BC006779	chr2:180962319-180976732	OK	27.1456	17.7312	-0.614422	-2.33018	0.0007	0.022965	yes	0.614422
ENSMUSG00000027660	Skil	chr3:30993979-31021499	OK	56.6581	37.1569	-0.608653	-2.28197	0.00095	0.029089	yes	0.608653
ENSMUSG00000027690	Slc2a2	chr3:28596824-28680030	OK	191.651	96.9493	-0.98318	-3.65059	5e-05	0.00246935	yes	0.98318
ENSMUSG00000027790	Sis	chr3:72692478-72771785	OK	2261.26	961.553	-1.23369	-2.33066	0.0009	0.0280251	yes	1.23369
ENSMUSG00000027797	Dclk1	chr3:55046447-55342986	OK	1.37188	3.25738	1.24755	3.54999	5e-05	0.00246935	yes	-1.24755
ENSMUSG00000027801	Tm4sf4	chr3:57229235-57245599	OK	40.0604	195.157	2.28439	8.43454	5e-05	0.00246935	yes	-2.28439
ENSMUSG00000028019	Pdgfc	chr3:80840337-81017962	OK	4.98532	2.87485	-0.794201	-2.46204	0.0006	0.0204133	yes	0.794201
ENSMUSG00000028028	Alpk1	chr3:127373316-127483445	OK	7.25941	0.711344	-3.35123	-6.63483	5e-05	0.00246935	yes	3.35123
ENSMUSG00000028037	Ifi44	chr3:151393885-151412911	OK	7.33436	1.338	-2.45459	-6.0202	5e-05	0.00246935	yes	2.45459
ENSMUSG00000028179	Cth	chr3:157557211-157588041	OK	21.3647	41.5202	0.95858	3.12454	5e-05	0.00246935	yes	-0.95858
ENSMUSG00000028262	Clca2	chr3:144459522-144482458	OK	5.7824	2.10829	-1.45559	-4.49037	5e-05	0.00246935	yes	1.45559
ENSMUSG00000028435	Aqp3	chr4:41039754-41045216	OK	16.8596	33.9388	1.00936	3.02766	0.00015	0.00632064	yes	-1.00936
ENSMUSG00000028655	Mfsd2a	chr4:122624092-122638431	OK	27.005	15.1875	-0.830339	-2.90341	5e-05	0.00246935	yes	0.830339
ENSMUSG00000028713	Cyp4b1	chr4:115297302-115320322	OK	90.9532	196.329	1.11008	4.15597	5e-05	0.00246935	yes	-1.11008
ENSMUSG00000028755	Cda	chr4:137894338-137923907	OK	136.153	204.933	0.58992	2.30441	0.0016	0.0449468	yes	-0.58992
ENSMUSG00000028862	Map3k6	chr4:132796732-132808844	OK	7.13102	12.5628	0.816974	2.24859	0.00095	0.029089	yes	-0.816974
ENSMUSG00000028967	Errfi1	chr4:150199841-150243001	OK	32.2623	86.987	1.43095	5.11024	5e-05	0.00246935	yes	-1.43095
ENSMUSG00000028980	H6pd	chr4:149353583-149383132	OK	3.48954	1.74145	-1.00275	-3.07329	5e-05	0.00246935	yes	1.00275
ENSMUSG00000029084	Cd38	chr5:44260047-44303614	OK	36.5621	19.7194	-0.890738	-3.32411	5e-05	0.00246935	yes	0.890738
ENSMUSG00000029086	Prom1	chr5:44384863-44493752	OK	10.1028	5.88676	-0.779217	-2.72643	0.0001	0.00457015	yes	0.779217
ENSMUSG00000029413	Naaa	chr5:92686684-92707196	OK	19.3915	30.7079	0.663191	2.37984	0.00045	0.0160221	yes	-0.663191
ENSMUSG00000029415	Sdad1	chr5:92713035-92739050	OK	3.0277	5.29821	0.80728	2.78014	5e-05	0.00246935	yes	-0.80728
ENSMUSG00000029561	Oasl2	chr5:115346942-115362243	OK	135.338	78.9247	-0.778017	-2.5126	0.00065	0.0217124	yes	0.778017
ENSMUSG00000029630	Cyp3a25	chr5:146788769-146821194	OK	316.615	182.607	-0.793987	-2.90776	5e-05	0.00246935	yes	0.793987
ENSMUSG00000029657	Hsph1	chr5:150416861-150438951	OK	4.31645	7.2647	0.751056	2.50534	0.00025	0.00989871	yes	-0.751056
ENSMUSG00000029700	Slc13a1	chr6:24038282-24118092	OK	33.3953	61.712	0.885906	3.20853	5e-05	0.00246935	yes	-0.885906
ENSMUSG00000029720	Lrch4	chr5:138070348-138084130	OK	4.06933	8.31139	1.0303	2.94774	0.00015	0.00632064	yes	-1.0303
ENSMUSG00000029798	Herc6	chr6:57530985-57615130	OK	25.1169	10.8144	-1.2157	-4.4028	5e-05	0.00246935	yes	1.2157
ENSMUSG00000030017	Reg3g	chr6:78416262-78418866	OK	4749.92	242.086	-4.29431	-14.5629	5e-05	0.00246935	yes	4.29431
ENSMUSG00000030087	Klf15	chr6:90412569-90425232	OK	1.43339	6.25771	2.12621	5.87609	5e-05	0.00246935	yes	-2.12621
ENSMUSG00000030102	Itpr1	chr6:108163111-108501103	OK	26.9915	7.76664	-1.79714	-5.64445	5e-05	0.00246935	yes	1.79714
ENSMUSG00000030281	Il17rc	chr6:113421420-113433134	OK	61.375	97.8659	0.673156	1.96822	0.0012	0.0354444	yes	-0.673156
ENSMUSG00000030284	Creld1	chr6:113433290-113443332	OK	1.87325	5.43634	1.53709	3.56975	5e-05	0.00246935	yes	-1.53709
ENSMUSG00000030413	Pglyrp1	chr7:19470038-19475787	OK	40.8109	19.6094	-1.05741	-3.6797	5e-05	0.00246935	yes	1.05741
ENSMUSG00000030428	Ttyh1	chr7:4025726-4088528	OK	6.01917	2.36092	-1.35021	-2.4524	0.00095	0.029089	yes	1.35021
ENSMUSG00000030714	Ccdc101	chr7:133792736-133819946	OK	1.26598	3.90409	1.62473	2.60517	0.0001	0.00457015	yes	-1.62473
ENSMUSG00000030921	Trim30a	chr7:111557538-111613707	OK	16.6322	6.66847	-1.31855	-3.69	5e-05	0.00246935	yes	1.31855
ENSMUSG00000031073	Fgf15	chr7:152080464-152086858	OK	14.3359	28.1566	0.973839	3.33115	5e-05	0.00246935	yes	-0.973839
ENSMUSG00000031327	Chic1	chrX:100551814-100591431	OK	3.59246	1.77233	-1.01933	-3.45587	5e-05	0.00246935	yes	1.01933
ENSMUSG00000031557	Plekha2	chr8:26135922-26212666	OK	15.2398	9.21519	-0.725756	-2.61703	0.0001	0.00457015	yes	0.725756
ENSMUSG00000031633	Slc25a4	chr8:47292150-47296638	OK	2.52227	4.56886	0.857112	2.42518	0.0008	0.0256056	yes	-0.857112
ENSMUSG00000031725	Ces1f	chr8:95780134-95803646	OK	48.8886	95.5291	0.966441	3.00165	5e-05	0.00246935	yes	-0.966441
ENSMUSG00000031762	Mt2	chr8:96696517-96697467	OK	2.23566	45.3039	4.34086	10.0524	5e-05	0.00246935	yes	-4.34086
ENSMUSG00000031765	Mt1	chr8:96702988-96704225	OK	21.4748	149.432	2.79877	9.45168	5e-05	0.00246935	yes	-2.79877
ENSMUSG00000031996	Aplp2	chr9:30957141-31019400	OK	102.48	60.3342	-0.764293	-2.79686	5e-05	0.00246935	yes	0.764293
ENSMUSG00000032033	Barx2	chr9:31653681-31721047	OK	34.7485	18.2937	-0.925607	-3.44926	5e-05	0.00246935	yes	0.925607
ENSMUSG00000032315	Cyp1a1	chr9:57545419-57551629	OK	20.2615	7.65108	-1.40501	-5.08819	5e-05	0.00246935	yes	1.40501
ENSMUSG00000032348	Gsta4	chr9:78039772-78057155	OK	19.4574	36.7463	0.91728	3.25205	0.0001	0.00457015	yes	-0.91728
ENSMUSG00000032369	Plscr1	chr9:92144894-92166813	OK	11.136	21.7276	0.964292	3.42655	5e-05	0.00246935	yes	-0.964292
ENSMUSG00000032532	Cck	chr9:121398942-121404807	OK	35.3253	20.2263	-0.804471	-2.75336	0.00015	0.00632064	yes	0.804471
ENSMUSG00000032666	1700025G04Rik	chr1:153731653-153937450	OK	5.88205	12.4112	1.07725	2.2624	0.00145	0.0418858	yes	-1.07725
ENSMUSG00000033355	Rtp4	chr16:23610004-23614308	OK	20.6516	10.7519	-0.941666	-3.34231	5e-05	0.00246935	yes	0.941666
ENSMUSG00000033502	Cdc14a	chr3:115975470-116126950	OK	11.2271	6.66444	-0.752434	-2.70261	5e-05	0.00246935	yes	0.752434
ENSMUSG00000033538	Casp4	chr9:5308827-5336783	OK	70.5619	19.8703	-1.82828	-5.86241	5e-05	0.00246935	yes	1.82828
ENSMUSG00000033581	Igf2bp2	chr16:22059081-22163372	OK	11.6046	6.98149	-0.73309	-2.38485	0.00035	0.0131766	yes	0.73309
ENSMUSG00000033715	Akr1c14	chr13:4048256-4089668	OK	11.2349	17.6913	0.655057	2.34951	0.00095	0.029089	yes	-0.655057
ENSMUSG00000033847	Pla2g4c	chr7:13910003-13946021	OK	0.223886	10.3631	5.53254	8.0712	5e-05	0.00246935	yes	-5.53254
ENSMUSG00000034159	2310007B03Rik	chr1:95047925-95057525	OK	3.99803	2.15239	-0.893353	-2.57452	0.00035	0.0131766	yes	0.893353
ENSMUSG00000034248	Slc25a37	chr14:69859907-69903160	OK	49.0912	83.6276	0.768516	2.9187	0.0001	0.00457015	yes	-0.768516
ENSMUSG00000034258	Mfsd7c	chr12:87087488-87154535	OK	2.10453	5.64362	1.42312	4.45932	5e-05	0.00246935	yes	-1.42312
ENSMUSG00000034371	Dak	chr19:10651943-10679922	OK	170.936	89.1058	-0.939864	-3.35911	5e-05	0.00246935	yes	0.939864
ENSMUSG00000034459	Ifit1	chr19:34715360-34724499	OK	77.3371	37.6212	-1.03962	-3.85019	5e-05	0.00246935	yes	1.03962
ENSMUSG00000034785	Dio1	chr4:106964069-106979774	OK	102.724	51.9429	-0.983775	-3.72082	5e-05	0.00246935	yes	0.983775
ENSMUSG00000034936	Arl4d	chr11:101526854-101529146	OK	7.47875	12.249	0.711796	2.45676	0.00085	0.0267401	yes	-0.711796
ENSMUSG00000035105	Egln3	chr12:55279967-55304847	OK	11.1021	18.9842	0.773966	2.88031	5e-05	0.00246935	yes	-0.773966
ENSMUSG00000035186	Ubd	chr17:37330836-37333040	OK	35.9795	3.08703	-3.54288	-9.68268	5e-05	0.00246935	yes	3.54288
ENSMUSG00000035314	Gdpd5	chr7:106530058-106609493	OK	3.52309	1.58629	-1.15118	-3.6519	5e-05	0.00246935	yes	1.15118
ENSMUSG00000035356	Nfkbiz	chr16:55811487-55839012	OK	32.1064	16.3912	-0.969937	-3.66044	5e-05	0.00246935	yes	0.969937
ENSMUSG00000035493	Tgfbi	chr13:56710919-56740923	OK	202.262	133.213	-0.602483	-2.24702	0.00115	0.0344101	yes	0.602483
ENSMUSG00000035561	Aldh1b1	chr4:45811893-45817476	OK	65.2781	104.239	0.675223	2.56309	0.00025	0.00989871	yes	-0.675223
ENSMUSG00000035692	Isg15	chr4:155573532-155574927	OK	45.9388	22.3969	-1.03641	-3.72213	5e-05	0.00246935	yes	1.03641
ENSMUSG00000035713	Usp35	chr7:104457889-104480530	OK	3.08703	8.41193	1.44622	3.38756	5e-05	0.00246935	yes	-1.44622
ENSMUSG00000035849	Krt222	chr11:99094074-99105399	OK	2.77967	1.25004	-1.15294	-2.60777	0.00015	0.00632064	yes	1.15294
ENSMUSG00000036027	1810046K07Rik	chr9:51097790-51137022	OK	4.94079	12.0453	1.28566	3.98659	5e-05	0.00246935	yes	-1.28566
ENSMUSG00000036123	Slc9a3	chr13:74258962-74303512	OK	125.512	55.5258	-1.1766	-4.47488	5e-05	0.00246935	yes	1.1766
ENSMUSG00000036368	Fam82a1	chr17:80014239-80081492	OK	6.75627	3.86578	-0.805469	-2.4325	0.00085	0.0267401	yes	0.805469
ENSMUSG00000036853	Mcoln3	chr3:145780422-145804770	OK	5.35775	1.83423	-1.54646	-3.04411	5e-05	0.00246935	yes	1.54646
ENSMUSG00000036880	Acaa2	chr18:74938850-74965861	OK	38.6135	69.2414	0.842529	3.18078	5e-05	0.00246935	yes	-0.842529
ENSMUSG00000036943	Rab8b	chr9:66691478-66767512	OK	7.89613	4.77007	-0.727136	-2.55612	0.0005	0.0173977	yes	0.727136
ENSMUSG00000037033	Clca4	chr3:144485586-144512321	OK	25.5624	14.5863	-0.809406	-2.74643	0.00025	0.00989871	yes	0.809406
ENSMUSG00000037145	2210407C18Rik	chr11:58421705-58429577	OK	422.106	185.14	-1.18899	-4.45275	5e-05	0.00246935	yes	1.18899
ENSMUSG00000037348	Paqr7	chr4:134052611-134066150	OK	12.9966	22.4814	0.7906	2.71921	0.00015	0.00632064	yes	-0.7906
ENSMUSG00000037390	Muc3	chr5:137610793-137625994	OK	787.642	1321.3	0.746342	2.50614	0.0005	0.0173977	yes	-0.746342
ENSMUSG00000037419	Endod1	chr9:14158433-14185951	OK	12.4019	7.46046	-0.733228	-2.66819	5e-05	0.00246935	yes	0.733228
ENSMUSG00000037465	Klf10	chr15:38221218-38230464	OK	11.1022	6.10122	-0.863676	-2.99346	5e-05	0.00246935	yes	0.863676
ENSMUSG00000037703	Prosapip1	chr2:130458574-130468539	OK	12.6621	7.151	-0.824302	-3.07431	5e-05	0.00246935	yes	0.824302
ENSMUSG00000037750	BC017647	chr11:77908161-77970202	OK	4.49826	8.51496	0.920633	3.17934	5e-05	0.00246935	yes	-0.920633
ENSMUSG00000037754	Ppp1r16b	chr2:158491133-158592070	OK	2.9811	1.06691	-1.48241	-4.74367	5e-05	0.00246935	yes	1.48241
ENSMUSG00000037820	Tgm2	chr2:157854232-157972172	OK	24.9527	10.969	-1.18576	-3.80188	5e-05	0.00246935	yes	1.18576
ENSMUSG00000037921	Ddx60	chr8:64406883-64516498	OK	62.321	23.3666	-1.41527	-3.34015	5e-05	0.00246935	yes	1.41527
ENSMUSG00000038209	Itln1	chr1:173448252-173465425	OK	124.702	76.3021	-0.708687	-2.56437	0.0002	0.0081292	yes	0.708687
ENSMUSG00000038256	Bcl9	chr3:97007584-97032769	OK	5.15046	2.5495	-1.01449	-2.31651	5e-05	0.00246935	yes	1.01449
ENSMUSG00000038332	Sesn1	chr10:41530379-41628230	OK	81.7858	50.6699	-0.690721	-2.61423	0.0001	0.00457015	yes	0.690721
ENSMUSG00000038370	Pcp4l1	chr1:173103392-173126399	OK	2.93702	6.13711	1.06321	3.02439	5e-05	0.00246935	yes	-1.06321
ENSMUSG00000038393	Txnip	chr3:96359687-96370724	OK	96.9097	63.7383	-0.60448	-2.10774	0.0012	0.0354444	yes	0.60448
ENSMUSG00000038751	Ptk6	chr2:180928425-180937494	OK	23.1229	13.1663	-0.81247	-3.04139	5e-05	0.00246935	yes	0.81247
ENSMUSG00000039007	Pgcp	chr15:33012883-33524307	OK	10.8479	6.50206	-0.738442	-2.45259	0.00045	0.0160221	yes	0.738442
ENSMUSG00000039013	Siglec5	chr7:50606710-50614901	OK	2.05786	5.48861	1.4153	4.03089	5e-05	0.00246935	yes	-1.4153
ENSMUSG00000039217	Il18	chr9:50383377-50389942	OK	64.041	36.3319	-0.81776	-2.91788	0.0002	0.0081292	yes	0.81776
ENSMUSG00000039405	Prss23	chr7:96656294-96666096	OK	8.40193	13.302	0.662851	2.38033	0.00075	0.0242588	yes	-0.662851
ENSMUSG00000039501	Znfx1	chr2:166861292-166891362	OK	28.3374	17.0857	-0.729917	-2.37346	0.00085	0.0267401	yes	0.729917
ENSMUSG00000039629	Fam40b	chr6:29867012-29909681	OK	1.24896	3.49291	1.4837	4.36662	5e-05	0.00246935	yes	-1.4837
ENSMUSG00000039911	Spsb1	chr4:149270391-149329152	OK	10.6522	5.95594	-0.838752	-2.80858	5e-05	0.00246935	yes	0.838752
ENSMUSG00000040097	Flywch1	chr17:23878166-23908558	OK	11.6117	20.3953	0.812655	2.79904	0.00015	0.00632064	yes	-0.812655
ENSMUSG00000040147	Maob	chrX:16286407-16394492	OK	71.7898	113.344	0.658863	2.50617	0.00045	0.0160221	yes	-0.658863
ENSMUSG00000040562	Gstm2	chr3:107784619-107789371	OK	1.94647	4.02701	1.04885	2.45157	0.0005	0.0173977	yes	-1.04885
ENSMUSG00000040606	Kazn	chr4:141658304-141795316	OK	3.18737	1.57899	-1.01337	-2.6705	5e-05	0.00246935	yes	1.01337
ENSMUSG00000041075	Fzd7	chr1:59538990-59543791	OK	6.73169	3.82418	-0.815819	-2.8981	0.0001	0.00457015	yes	0.815819
ENSMUSG00000041301	Cftr	chr6:18120686-18272768	OK	21.3012	13.8125	-0.624954	-2.30665	0.00075	0.0242588	yes	0.624954
ENSMUSG00000041440	Gk5	chr9:96019780-96085046	OK	7.51511	12.3085	0.71179	2.41564	0.0004	0.0146976	yes	-0.71179
ENSMUSG00000041660	Bbox1	chr2:110102853-110154717	OK	4.14353	1.70004	-1.2853	-3.76344	5e-05	0.00246935	yes	1.2853
ENSMUSG00000041920	Slc16a6	chr11:109287259-109434644	OK	45.2202	12.0264	-1.91077	-4.35557	5e-05	0.00246935	yes	1.91077
ENSMUSG00000042096	Dao	chr5:114453711-114475458	OK	12.2775	2.92041	-2.07177	-5.92696	5e-05	0.00246935	yes	2.07177
ENSMUSG00000042121	Ssh1	chr5:114387102-114443903	OK	3.26715	1.42049	-1.20164	-3.16065	5e-05	0.00246935	yes	1.20164
ENSMUSG00000042195	Slc35f2	chr9:53619341-53665968	OK	59.9105	34.9712	-0.776642	-2.96258	5e-05	0.00246935	yes	0.776642
ENSMUSG00000042228	Lyn	chr4:3605261-3740269	OK	28.1067	18.2507	-0.622963	-2.27255	0.0007	0.022965	yes	0.622963
ENSMUSG00000042246	Tmc7	chr7:125679356-125728250	OK	6.13636	10.1436	0.725118	2.40398	0.00015	0.00632064	yes	-0.725118
ENSMUSG00000042251	Pm20d1	chr1:133693957-133718050	OK	37.5512	24.4797	-0.617272	-1.95368	0.00085	0.0267401	yes	0.617272
ENSMUSG00000042406	Atf4	chr15:80085613-80087970	OK	68.2611	109.408	0.680585	2.61956	0.0001	0.00457015	yes	-0.680585
ENSMUSG00000042677	Zc3h12a	chr4:124795666-124805084	OK	22.0568	7.66573	-1.52473	-4.03647	5e-05	0.00246935	yes	1.52473
ENSMUSG00000043592	Unc5cl	chr17:48594225-48679039	OK	43.507	25.4841	-0.771648	-2.82184	5e-05	0.00246935	yes	0.771648
ENSMUSG00000043789	Vwce	chr19:10708722-10739700	OK	6.49228	3.87429	-0.744792	-2.67245	0.0002	0.0081292	yes	0.744792
ENSMUSG00000044017	Gpr133	chr5:129602624-129710474	OK	12.2087	20.7329	0.764017	2.77617	5e-05	0.00246935	yes	-0.764017
ENSMUSG00000044165	Bcl2l15	chr3:103636523-103658541	OK	25.1136	42.7683	0.768074	2.59516	0.0001	0.00457015	yes	-0.768074
ENSMUSG00000044254	Pcsk9	chr4:106114933-106136934	OK	0.896257	2.94386	1.71573	4.78623	5e-05	0.00246935	yes	-1.71573
ENSMUSG00000045871	Slitrk6	chr14:111147799-111154371	OK	3.82977	1.42354	-1.42778	-4.28166	5e-05	0.00246935	yes	1.42778
ENSMUSG00000046312	AI464131	chr4:41442636-41450109	OK	5.56295	3.38579	-0.716357	-2.42902	0.00075	0.0242588	yes	0.716357
ENSMUSG00000046460	Sh2d7	chr9:54381952-54408025	OK	1.43435	4.07189	1.5053	4.06191	5e-05	0.00246935	yes	-1.5053
ENSMUSG00000046688	Tifa	chr3:127492789-127540410	OK	59.0549	10.5382	-2.48642	-3.91182	5e-05	0.00246935	yes	2.48642
ENSMUSG00000046718	Bst2	chr8:74058162-74061336	OK	11.2628	6.25258	-0.849043	-2.56329	0.0003	0.0116278	yes	0.849043
ENSMUSG00000047139	Cd24a	chr10:43298974-43304068	OK	27.6275	56.697	1.03716	3.77145	5e-05	0.00246935	yes	-1.03716
ENSMUSG00000048107	Kctd12	chr14:103377436-103381745	OK	4.34332	10.8266	1.31771	4.00594	5e-05	0.00246935	yes	-1.31771
ENSMUSG00000048486	Fitm2	chr2:163292114-163298647	OK	2.64226	4.32801	0.711934	2.35342	0.001	0.0304172	yes	-0.711934
ENSMUSG00000048583	Igf2	chr7:149836672-149856261	OK	6.29599	11.737	0.898564	3.07669	5e-05	0.00246935	yes	-0.898564
ENSMUSG00000049307	Fut4	chr9:14552902-14556566	OK	5.79675	9.66815	0.737996	2.61798	0.0004	0.0146976	yes	-0.737996
ENSMUSG00000049608	Gpr55	chr1:87825057-87857630	OK	4.29151	2.50269	-0.778005	-2.40389	0.00065	0.0217124	yes	0.778005
ENSMUSG00000049791	Fzd4	chr7:96552875-96558620	OK	6.96642	4.11296	-0.76024	-2.60143	0.00015	0.00632064	yes	0.76024
ENSMUSG00000050158	Olfr165	chr16:19407131-19408171	OK	14.4435	25.71	0.831911	2.74213	0.0003	0.0116278	yes	-0.831911
ENSMUSG00000051079	Rgs13	chr1:145985796-146024502	OK	5.59426	11.4028	1.02737	2.98378	5e-05	0.00246935	yes	-1.02737
ENSMUSG00000051359	Ncald	chr15:37295929-37722325	OK	5.79693	3.04359	-0.929513	-2.90773	0.0001	0.00457015	yes	0.929513
ENSMUSG00000051615	Rap2a	chr14:120877665-120906416	OK	3.78718	6.29265	0.732545	2.48355	0.00065	0.0217124	yes	-0.732545
ENSMUSG00000051652	Lrrc3	chr10:77360319-77365281	OK	1.50817	3.32252	1.13948	3.51963	5e-05	0.00246935	yes	-1.13948
ENSMUSG00000051727	Kctd14	chr7:104599843-104608063	OK	4.9048	1.28371	-1.93388	-3.04925	5e-05	0.00246935	yes	1.93388
ENSMUSG00000052485	Tmem171	chr13:99456189-99464789	OK	12.3328	6.62724	-0.896016	-2.85297	0.0001	0.00457015	yes	0.896016
ENSMUSG00000052631	Sh2d6	chr6:72463637-72471628	OK	3.6197	13.3512	1.88303	4.73115	5e-05	0.00246935	yes	-1.88303
ENSMUSG00000052776	Oas1a	chr5:121346264-121357536	OK	12.7987	6.76822	-0.919152	-3.11059	5e-05	0.00246935	yes	0.919152
ENSMUSG00000052914	Cyp2j6	chr4:96182828-96220352	OK	92.181	146.25	0.665891	2.50004	0.00035	0.0131766	yes	-0.665891
ENSMUSG00000053279	Aldh1a1	chr19:20676450-20717952	OK	109.846	275.058	1.32425	4.95118	5e-05	0.00246935	yes	-1.32425
ENSMUSG00000053886	Sh2d4a	chr8:70800465-70871593	OK	3.61153	6.0943	0.754849	2.45946	0.0005	0.0173977	yes	-0.754849
ENSMUSG00000054404	Slfn5	chr11:82724051-82776443	OK	2.96795	0.44265	-2.74523	-5.507	5e-05	0.00246935	yes	2.74523
ENSMUSG00000054417	Cyp3a44	chr5:146585558-146617450	OK	3.62931	0.673616	-2.4297	-5.2655	5e-05	0.00246935	yes	2.4297
ENSMUSG00000054422	Fabp1	chr6:71149820-71155017	OK	3288.08	1794.47	-0.873687	-3.07422	5e-05	0.00246935	yes	0.873687
ENSMUSG00000054630	Ugt2b5	chr5:87553980-87569365	OK	3.26678	6.93138	1.08527	3.176	5e-05	0.00246935	yes	-1.08527
ENSMUSG00000054702	Ap1s3	chr1:79603450-79668547	OK	5.63018	2.49586	-1.17364	-3.12716	5e-05	0.00246935	yes	1.17364
ENSMUSG00000055114	Anxa13	chr15:58173428-58197682	OK	173.765	321.921	0.889573	3.47571	5e-05	0.00246935	yes	-0.889573
ENSMUSG00000055748	Gsdmc4	chr15:63722819-63734491	OK	2.53107	5.47675	1.11357	3.06533	5e-05	0.00246935	yes	-1.11357
ENSMUSG00000055827	Gsdmc3	chr15:63689825-63700852	OK	1.05585	2.75174	1.38194	2.94695	0.0001	0.00457015	yes	-1.38194
ENSMUSG00000056293	Gsdmc2	chr15:63655900-63667504	OK	2.28079	5.53485	1.27901	3.45026	5e-05	0.00246935	yes	-1.27901
ENSMUSG00000056529	Ptafr	chr4:132119981-132138598	OK	2.69583	0.916299	-1.55684	-4.24147	5e-05	0.00246935	yes	1.55684
ENSMUSG00000056973	Ces1d	chr8:95689966-95721737	OK	8.52904	18.2533	1.0977	3.82883	5e-05	0.00246935	yes	-1.0977
ENSMUSG00000057074	Ces1g	chr8:95826267-95861207	OK	4.69329	10.1601	1.11425	3.70328	5e-05	0.00246935	yes	-1.11425
ENSMUSG00000057103	Cml1	chr6:85860147-85865681	OK	7.60587	12.4943	0.716089	2.236	0.0015	0.0431944	yes	-0.716089
ENSMUSG00000057969	Sema3b	chr9:107500004-107511560	OK	19.9619	12.0455	-0.728746	-2.70739	0.00025	0.00989871	yes	0.728746
ENSMUSG00000058135	Gstm1	chr3:107815172-107820891	OK	14.4513	31.5645	1.12711	3.95077	5e-05	0.00246935	yes	-1.12711
ENSMUSG00000058163	Gm5431	chr11:48700923-48715654	OK	26.9062	15.9929	-0.750503	-2.7731	0.00015	0.00632064	yes	0.750503
ENSMUSG00000058618	AY761184	chr8:22812990-22814117	OK	103.393	63.1446	-0.711409	-2.29612	0.00035	0.0131766	yes	0.711409
ENSMUSG00000059654	Reg1	chr6:78375973-78378661	OK	478.981	202.798	-1.23992	-4.47179	5e-05	0.00246935	yes	1.23992
ENSMUSG00000060063	Alox5ap	chr5:150076633-150099621	OK	2.26812	7.95452	1.81028	3.21001	5e-05	0.00246935	yes	-1.81028
ENSMUSG00000061758	Akr1b10	chr6:34334217-34346950	OK	4.46801	1.9174	-1.22048	-2.82384	0.0003	0.0116278	yes	1.22048
ENSMUSG00000061959	Ces1e	chr8:95725116-95753518	OK	5.96937	10.5904	0.827101	2.43383	0.0006	0.0204133	yes	-0.827101
ENSMUSG00000063522	2010109I03Rik	chr15:74708765-74712134	OK	185.848	313.067	0.752348	2.8232	5e-05	0.00246935	yes	-0.752348
ENSMUSG00000063696	Gm8730	chr8:105388678-105389777	OK	1.97274	3.99597	1.01835	2.50833	0.00115	0.0344101	yes	-1.01835
ENSMUSG00000064225	Paqr9	chr9:95460235-95462540	OK	8.88674	0.893676	-3.31383	-8.03442	5e-05	0.00246935	yes	3.31383
ENSMUSG00000065037	7SK	chr9:78023109-78023440	OK	10.8554	24.1775	1.15525	3.37181	5e-05	0.00246935	yes	-1.15525
ENSMUSG00000065956	Gm14850	chr8:22675857-22676821	OK	49.1614	20.9215	-1.23254	-3.41248	5e-05	0.00246935	yes	1.23254
ENSMUSG00000065957	Gm15308	chr8:22639501-22666759	OK	23.7275	11.6926	-1.02097	-2.54208	5e-05	0.00246935	yes	1.02097
ENSMUSG00000066867	Oas1e	chr5:121236320-121245539	OK	1.89173	6.13396	1.69711	4.5874	5e-05	0.00246935	yes	-1.69711
ENSMUSG00000067149	Igj	chr5:88949536-88956916	OK	4.19349	0.78082	-2.42509	-4.78244	5e-05	0.00246935	yes	2.42509
ENSMUSG00000067235	H2-Q10	chr17:35607033-35611508	OK	1.51836	5.86468	1.94954	5.11304	5e-05	0.00246935	yes	-1.94954
ENSMUSG00000067297	2010002M12Rik	chr19:34691538-34715233	OK	140.498	83.9521	-0.742908	-2.76063	5e-05	0.00246935	yes	0.742908
ENSMUSG00000067377	Tspan6	chrX:130425606-130432968	OK	2.62224	5.76062	1.13542	2.4489	0.00045	0.0160221	yes	-1.13542
ENSMUSG00000068587	Mgam	chr6:40578829-40719122	OK	566.159	324.628	-0.802418	-2.67415	0.0002	0.0081292	yes	0.802418
ENSMUSG00000068747	Sort1	chr3:108086815-108164429	OK	30.3562	16.9967	-0.836734	-2.60839	5e-05	0.00246935	yes	0.836734
ENSMUSG00000069515	Lyz1	chr10:116724851-116729924	OK	264.178	147.266	-0.843084	-2.80594	0.0003	0.0116278	yes	0.843084
ENSMUSG00000069805	Fbp1	chr13:62966112-62989642	OK	18.2479	3.44989	-2.40311	-6.24853	5e-05	0.00246935	yes	2.40311
ENSMUSG00000070704	Ugt2b36	chr5:87494951-87521580	OK	5.18234	8.75441	0.756407	2.39432	0.0009	0.0280251	yes	-0.756407
ENSMUSG00000070889	Pgap1	chr1:54537549-54614526	OK	1.82882	3.43386	0.908916	2.5384	0.00065	0.0217124	yes	-0.908916
ENSMUSG00000071286	Sowahc	chr10:58684700-58689179	OK	11.3344	17.5148	0.62787	2.30895	0.00115	0.0344101	yes	-0.62787
ENSMUSG00000071356	Reg3b	chr6:78320878-78323460	OK	8199.27	265.206	-4.95031	-15.9409	5e-05	0.00246935	yes	4.95031
ENSMUSG00000071551	Akr1c19	chr13:4227945-4247927	OK	5.8086	52.7782	3.18368	9.96858	5e-05	0.00246935	yes	-3.18368
ENSMUSG00000071637	Cebpd	chr16:15887378-15888559	OK	11.936	7.24073	-0.721114	-2.26058	0.0016	0.0449468	yes	0.721114
ENSMUSG00000072214	2016-09-05	chr16:18620411-18630004	OK	87.3532	132.08	0.596485	2.16804	0.00155	0.0442183	yes	-0.596485
ENSMUSG00000072620	Slfn2	chr11:82878613-82884180	OK	12.613	5.34188	-1.23949	-4.11762	5e-05	0.00246935	yes	1.23949
ENSMUSG00000074093	Svip	chr7:59252534-59261388	OK	10.8712	20.9395	0.94571	3.46718	5e-05	0.00246935	yes	-0.94571
ENSMUSG00000074181	Gm3776	chr9:78104948-78116973	OK	0.544814	2.99912	2.4607	3.92875	5e-05	0.00246935	yes	-2.4607
ENSMUSG00000074183	Gsta1	chr9:78078462-78090491	OK	13.2485	25.3406	0.935617	2.91525	5e-05	0.00246935	yes	-0.935617
ENSMUSG00000074207	Adh1	chr3:137923954-137969986	OK	138.424	236.624	0.7735	2.88348	5e-05	0.00246935	yes	-0.7735
ENSMUSG00000074437	Defa-rs1	chr8:22465565-22466699	OK	11.8905	6.18684	-0.942539	-2.13757	0.0013	0.0379105	yes	0.942539
ENSMUSG00000074443	Defa22	chr8:22301955-22302928	OK	74.4568	31.552	-1.23867	-3.45486	5e-05	0.00246935	yes	1.23867
ENSMUSG00000074447	Defa21	chr8:22165223-22166195	OK	92.7774	45.6633	-1.02274	-2.94028	5e-05	0.00246935	yes	1.02274
ENSMUSG00000074794	Arrdc3	chr13:81022644-81035296	OK	10.3861	6.2452	-0.733834	-2.45413	0.00025	0.00989871	yes	0.733834
ENSMUSG00000074896	Ifit3	chr19:34658020-34663221	OK	7.58845	3.39741	-1.15937	-3.53752	5e-05	0.00246935	yes	1.15937
ENSMUSG00000074968	Ano3	chr2:110495357-110791080	OK	1.87284	6.29384	1.74871	5.52928	5e-05	0.00246935	yes	-1.74871
ENSMUSG00000076609	Igkc	chr6:70676428-70676751	OK	38.4597	12.2349	-1.65234	-4.12366	5e-05	0.00246935	yes	1.65234
ENSMUSG00000076613	Ighg2b	chr12:114544599-114546144	OK	3.28691	0.102787	-4.999	-5.18215	0.00155	0.0442183	yes	4.999
ENSMUSG00000079180	Gm11062	chr1:175204591-175207853	OK	40.0104	5.23133	-2.93513	-8.75612	5e-05	0.00246935	yes	2.93513
ENSMUSG00000079339	Gm14446	chr19:34667377-34676458	OK	187.127	58.1513	-1.68614	-6.33567	5e-05	0.00246935	yes	1.68614
ENSMUSG00000079362	Gbp6	chr5:105699722-105722718	OK	3.60808	1.46324	-1.30206	-3.87106	5e-05	0.00246935	yes	1.30206
ENSMUSG00000079445	B3gnt7	chr1:88199795-88203878	OK	8.60066	4.81297	-0.837519	-2.93076	5e-05	0.00246935	yes	0.837519
ENSMUSG00000079620	Muc4	chr16:32735971-32797521	OK	13.7069	5.61247	-1.2882	-2.89655	5e-05	0.00246935	yes	1.2882
ENSMUSG00000082292	Gm12250	chr11:57997344-58003700	OK	19.6135	12.023	-0.706055	-2.38522	0.0007	0.022965	yes	0.706055
ENSMUSG00000083020	Gm15331	chr17:34638051-34638436	OK	20.9894	43.9237	1.06534	3.42419	5e-05	0.00246935	yes	-1.06534
ENSMUSG00000084289	Gm6977	chrX:87989884-87990401	OK	189.476	104.272	-0.861658	-3.23531	5e-05	0.00246935	yes	0.861658
ENSMUSG00000085062	4933404O12Rik	chr5:137395015-137412982	OK	6.4385	3.71206	-0.794504	-2.7847	0.0002	0.0081292	yes	0.794504
ENSMUSG00000086265	Marcksl1-ps4	chr13:4247980-4248271	OK	1.05008	12.8878	3.61744	5.73506	5e-05	0.00246935	yes	-3.61744
ENSMUSG00000086825	Gm15675	chr1:132285102-132334491	OK	5.56975	10.7284	0.945754	2.78425	0.00015	0.00632064	yes	-0.945754
ENSMUSG00000087008	Gm5530	chr1:81738559-81739544	OK	2.72533	5.52645	1.01992	2.57519	0.00055	0.0189225	yes	-1.01992
ENSMUSG00000091166	Tstd1	chr1:173341443-173350483	OK	18.5347	35.3958	0.933347	2.19631	0.0016	0.0449468	yes	-0.933347
ENSMUSG00000091474	2610021A01Rik	chr7:48854630-48883903	OK	7.05336	3.73062	-0.918896	-3.1939	5e-05	0.00246935	yes	0.918896
ENSMUSG00000091578	Gstm2-ps1	chr5:117082916-117083471	OK	14.5014	27.5819	0.927531	2.32169	0.0016	0.0449468	yes	-0.927531
ENSMUSG00000000001	Gnai3	chr3:107910197-107949064	OK	101.497	95.3817	-0.0896462	-0.340642	0.6316	0.999355	no	0.0896462
ENSMUSG00000000003	Pbsn	chrX:75083239-75098962	NOTEST	0	0	0	0	1	1	no	0
ENSMUSG00000000028	Cdc45	chr16:18780539-18835354	NOTEST	0.665423	0.693768	0.0601824	0	1	1	no	-0.0601824
ENSMUSG00000000031	H19	chr7:149761433-149764048	NOTEST	0	0.0376906	inf	0	1	1	no	#VALUE!
ENSMUSG00000000037	Scml2	chrX:157555124-157696145	NOTEST	0.0563043	0.0140332	-2.0044	0	1	1	no	2.0044
ENSMUSG00000000049	Apoh	chr11:107794700-108275710	NOTEST	0.663451	0.395981	-0.744558	0	1	1	no	0.744558
ENSMUSG00000000056	Narf	chr11:121098566-121171210	OK	16.4911	16.067	-0.0375838	-0.0775504	0.89385	0.999355	no	0.0375838
ENSMUSG00000000058	Cav2	chr6:17147750-17335604	NOTEST	0.273635	0.179632	-0.607211	0	1	1	no	0.607211
ENSMUSG00000000078	Klf6	chr13:5860734-5869639	OK	96.4044	118.087	0.292675	1.09824	0.11655	0.794235	no	-0.292675
ENSMUSG00000000085	Scmh1	chr4:120077885-120202804	NOTEST	1.06122	1.16577	0.13556	0	1	1	no	-0.13556
ENSMUSG00000000088	Cox5a	chr9:57369038-57390994	OK	270.299	257.867	-0.0679244	-0.248616	0.725	0.999355	no	0.0679244
ENSMUSG00000000093	Tbx2	chr11:85646052-85655450	NOTEST	0.049201	0.041928	-0.230772	0	1	1	no	0.230772
ENSMUSG00000000094	Tbx4	chr11:85699923-85729599	NOTEST	0	0	0	0	1	1	no	0
ENSMUSG00000000103	Zfy2	chrY:1362122-1426357	NOTEST	0	0	0	0	1	1	no	0
ENSMUSG00000000120	Ngfr	chr11:95430131-95449049	NOTEST	0.0210636	0.00900025	-1.22671	0	1	1	no	1.22671
ENSMUSG00000000125	Wnt3	chr11:103635463-103679271	NOTEST	0.281785	0.178233	-0.660827	0	1	1	no	0.660827
ENSMUSG00000000126	Wnt9a	chr11:59120429-59147054	NOTEST	0.0597728	0.0761859	0.350034	0	1	1	no	-0.350034
ENSMUSG00000000127	Fer	chr17:64213363-64488843	OK	3.28699	2.90149	-0.179972	-0.547416	0.43385	0.999355	no	0.179972
ENSMUSG00000000131	Xpo6	chr7:133245228-133344015	OK	9.59989	12.7721	0.411907	0.901135	0.1923	0.958994	no	-0.411907
ENSMUSG00000000134	Tfe3	chrX:7339685-7352328	OK	8.4352	9.32867	0.145249	0.37092	0.54605	0.999355	no	-0.145249
ENSMUSG00000000142	Axin2	chr11:108781662-108812097	OK	14.7072	11.2205	-0.390381	-1.17381	0.0908	0.714117	no	0.390381
ENSMUSG00000000148	Baat1	chr5:141180964-141195333	NOTEST	2.4951	2.41436	-0.0474597	0	1	1	no	0.0474597
ENSMUSG00000000149	Gna12	chr5:141200080-141306385	OK	3.41345	3.12953	-0.125285	-0.40167	0.5776	0.999355	no	0.125285
ENSMUSG00000000154	Slc22a18	chr7:150659625-150685239	OK	60.2071	64.5489	0.100459	0.381562	0.59725	0.999355	no	-0.100459
ENSMUSG00000000157	Itgb2l	chr16:96583274-96747400	NOTEST	2.25912	2.44998	0.117013	0	1	1	no	-0.117013
ENSMUSG00000000159	Igsf5	chr16:96583274-96747400	OK	55.9955	62.7202	0.163619	0.547844	0.40545	0.999355	no	-0.163619
ENSMUSG00000000167	Pih1d2	chr9:50412005-50433105	NOTEST	0.310089	0.696824	1.16811	0	1	1	no	-1.16811
ENSMUSG00000000168	Dlat	chr9:50442737-50467885	OK	13.8578	10.6879	-0.37472	-0.967077	0.14485	0.874239	no	0.37472
ENSMUSG00000000171	Sdhd	chr9:50404442-50411954	OK	188.78	187.206	-0.0120789	-0.0462457	0.94565	0.999355	no	0.0120789
ENSMUSG00000000182	Fgf23	chr6:127022919-127031426	NOTEST	0	0.00675775	inf	0	1	1	no	#VALUE!
ENSMUSG00000000183	Fgf6	chr6:126965559-126974736	NOTEST	0	0	0	0	1	1	no	0
ENSMUSG00000000184	Ccnd2	chr6:127075796-127162429	OK	10.5965	9.3112	-0.186544	-0.683663	0.32255	0.999355	no	0.186544
ENSMUSG00000000194	Gpr107	chr2:31007835-31075068	OK	52.3328	44.3069	-0.240184	-0.581225	0.3175	0.999355	no	0.240184
ENSMUSG00000000197	Nalcn	chr14:123675862-124026366	NOTEST	0	0	0	0	1	1	no	0
ENSMUSG00000000202	Btbd17	chr11:114652530-114657259	NOTEST	0.0599768	0.0474474	-0.338074	0	1	1	no	0.338074
ENSMUSG00000000204	Slfn4	chr11:82988687-83003723	OK	6.98664	4.69805	-0.572536	-1.40645	0.03985	0.463951	no	0.572536
ENSMUSG00000000214	Th	chr7:150078656-150117033	NOTEST	0.123872	0.262933	1.08584	0	1	1	no	-1.08584
ENSMUSG00000000215	Ins2	chr7:149864560-149885415	NOTEST	0	0	0	0	1	1	no	0
ENSMUSG00000000216	Scnn1g	chr7:128877992-128911989	NOTEST	0	0	0	0	1	1	no	0
ENSMUSG00000000223	Drp2	chrX:130939089-130991112	NOTEST	0.00453342	0.00911485	1.00762	0	1	1	no	-1.00762
ENSMUSG00000000244	Tspan32	chr7:150174873-150205549	NOTEST	0.157541	0.175476	0.155544	0	1	1	no	-0.155544
ENSMUSG00000000247	Lhx2	chr2:38194800-38225253	NOTEST	0	0	0	0	1	1	no	0
ENSMUSG00000000248	Clec2g	chr6:128884398-128970537	NOTEST	0.0949494	0.0388385	-1.28967	0	1	1	no	1.28967
ENSMUSG00000000253	Gmpr	chr13:45602812-45641751	NOTEST	0.0883413	0.167427	0.922374	0	1	1	no	-0.922374
ENSMUSG00000000263	Glra1	chr11:55327739-55421700	NOTEST	0.00666349	0	#NAME?	0	1	1	no	#NAME?
ENSMUSG00000000275	Trim25	chr11:88860689-88881607	OK	52.5354	48.2649	-0.122315	-0.449781	0.5106	0.999355	no	0.122315
ENSMUSG00000000276	Dgke	chr11:88896492-88930412	NOTEST	0.640053	0.724731	0.179254	0	1	1	no	-0.179254
ENSMUSG00000000278	Scpep1	chr11:88767241-88816779	OK	16.5813	16.7943	0.018417	0.0670112	0.92585	0.999355	no	-0.018417
ENSMUSG00000000282	Mnt	chr11:74644421-74659227	OK	6.21533	6.20126	-0.00326805	-0.0118399	0.98625	0.999355	no	0.00326805
ENSMUSG00000000290	Itgb2	chr10:76992996-77028453	NOTEST	1.53544	1.42697	-0.105697	0	1	1	no	0.105697
ENSMUSG00000000295	Hddc2	chr10:31033187-31048010	NOTEST	0.80967	1.28913	0.670995	0	1	1	no	-0.670995
ENSMUSG00000000296	Tpd52l1	chr10:31052185-31165727	NOTEST	0.136572	0.175503	0.361827	0	1	1	no	-0.361827
ENSMUSG00000000301	Pemt	chr11:59784115-59859991	NOTEST	0.288962	0.516999	0.839285	0	1	1	no	-0.839285
ENSMUSG00000000303	Cdh1	chr8:109127250-109194146	OK	229.037	236.949	0.0489978	0.176159	0.7979	0.999355	no	-0.0489978
ENSMUSG00000000305	Cdh4	chr2:179177135-179634078	NOTEST	0.0379307	0.0125251	-1.59855	0	1	1	no	1.59855
ENSMUSG00000000308	Ckmt1	chr2:121183449-121212904	OK	844.032	875.872	0.0534216	0.182082	0.7882	0.999355	no	-0.0534216
ENSMUSG00000000317	Bcl6b	chr11:70037629-70043300	NOTEST	0.0576646	0.024152	-1.25554	0	1	1	no	1.25554
ENSMUSG00000000318	Clec10a	chr11:69980124-69984336	NOTEST	0.0215698	0.0169478	-0.347914	0	1	1	no	0.347914
ENSMUSG00000000320	Alox12	chr11:70054958-70068855	NOTEST	0.00589091	0.00730932	0.311247	0	1	1	no	-0.311247
ENSMUSG00000000325	Arvcf	chr16:18348274-18479166	NOTEST	0.602192	0.876065	0.540814	0	1	1	no	-0.540814
ENSMUSG00000000326	Comt	chr16:18348274-18479166	OK	62.6928	58.8042	-0.092381	-0.317295	0.6576	0.999355	no	0.092381
ENSMUSG00000000339	Rtcd1	chr3:116191880-116211126	OK	12.4508	11.2907	-0.141113	-0.426667	0.5431	0.999355	no	0.141113
ENSMUSG00000000340	Dbt	chr3:116215987-116252894	OK	4.31067	4.37029	0.0198173	0.0643228	0.926	0.999355	no	-0.0198173
ENSMUSG00000000346	Dazap2	chr15:100446068-100451184	OK	139.199	144.625	0.0551705	0.209473	0.76255	0.999355	no	-0.0551705
ENSMUSG00000000355	Mcts1	chrX:35953754-35966699	OK	43.9277	42.6332	-0.0431557	-0.145229	0.84065	0.999355	no	0.0431557
ENSMUSG00000000359	Rem1	chr2:152452686-152460934	NOTEST	0	0.00586261	inf	0	1	1	no	#VALUE!
ENSMUSG00000000365	Rnf17	chr14:57021533-57143869	NOTEST	0.0167079	0.0329015	0.977624	0	1	1	no	-0.977624
ENSMUSG00000000374	Trappc10	chr10:77649469-77707387	OK	27.0535	27.4814	0.0226389	0.0866484	0.90105	0.999355	no	-0.0226389
ENSMUSG00000000378	Ccm2	chr11:6446889-6496747	NOTEST	2.6602	2.61827	-0.0229194	0	1	1	no	0.0229194
ENSMUSG00000000381	Wap	chr11:6531489-6538652	NOTEST	0.0381008	0.0104637	-1.86443	0	1	1	no	1.86443
ENSMUSG00000000384	Tbrg4	chr11:6515600-6526070	OK	19.1222	20.9367	0.130785	0.364049	0.6121	0.999355	no	-0.130785
ENSMUSG00000000385	Tmprss2	chr16:97786290-97832802	OK	45.3969	45.1573	-0.00763555	-0.0295126	0.9676	0.999355	no	0.00763555
ENSMUSG00000000386	Mx1	chr16:97668641-97684514	OK	3.41484	4.76632	0.481058	1.45053	0.0354	0.430138	no	-0.481058
ENSMUSG00000000392	Fap	chr2:62338999-62412132	NOTEST	1.65982	1.86789	0.170378	0	1	1	no	-0.170378
ENSMUSG00000000399	Ndufa9	chr6:126771880-126799162	OK	66.8575	61.8558	-0.112181	-0.422015	0.54655	0.999355	no	0.112181
ENSMUSG00000000402	Egfl6	chrX:162960938-163023652	NOTEST	0.0259667	0.00915612	-1.50385	0	1	1	no	1.50385
ENSMUSG00000000409	Lck	chr4:129225587-129250885	OK	3.80823	4.01659	0.0768505	0.170248	0.80605	0.999355	no	-0.0768505
ENSMUSG00000000411	Tssk3	chr4:129166257-129168266	NOTEST	0.0458371	0.0347521	-0.399415	0	1	1	no	0.399415
ENSMUSG00000000416	Cttnbp2	chr6:18316477-18465338	NOTEST	0.487864	1.60076	1.71421	0	1	1	no	-1.71421
ENSMUSG00000000420	Galnt1	chr18:24363844-24445319	OK	102.075	76.1603	-0.422513	-1.26607	0.06385	0.604666	no	0.422513
ENSMUSG00000000435	Myf5	chr10:106919963-106923190	NOTEST	0	0	0	0	1	1	no	0
ENSMUSG00000000439	Mkrn2	chr6:115551948-115626657	OK	5.06623	4.50473	-0.169473	-0.16998	0.8134	0.999355	no	0.169473
ENSMUSG00000000440	Pparg	chr6:115311238-115440419	OK	4.92884	4.08016	-0.272621	-0.776964	0.26625	0.999355	no	0.272621
ENSMUSG00000000441	Raf1	chr6:115551948-115626657	OK	27.9619	29.5091	0.0776993	0.276176	0.6953	0.999355	no	-0.0776993
ENSMUSG00000000486	2016-09-01	chr7:134357960-134362012	NOTEST	2.68407	2.25543	-0.251018	0	1	1	no	0.251018
ENSMUSG00000000489	Pdgfb	chr15:79826329-79845238	NOTEST	0.157726	0.0565148	-1.48072	0	1	1	no	1.48072
ENSMUSG00000000530	Acvrl1	chr15:100958952-100975767	NOTEST	0.60698	0.589277	-0.0427045	0	1	1	no	0.0427045
ENSMUSG00000000531	Grasp	chr15:101054637-101063186	NOTEST	0.152624	0.156486	0.0360522	0	1	1	no	-0.0360522
ENSMUSG00000000532	Acvr1b	chr15:101004555-101043032	OK	19.098	16.1102	-0.245454	-0.926659	0.1934	0.960558	no	0.245454
ENSMUSG00000000538	Tom1l2	chr11:60040215-60166407	OK	40.679	41.2518	0.0201728	0.0684781	0.9203	0.999355	no	-0.0201728
ENSMUSG00000000544	Gpa33	chr1:168060368-168096641	OK	351.404	338.006	-0.0560821	-0.205115	0.77355	0.999355	no	0.0560821
ENSMUSG00000000552	Zfp385a	chr15:103144318-103170517	NOTEST	0.0642243	0.0597969	-0.103049	0	1	1	no	0.103049
ENSMUSG00000000555	Itga5	chr15:103174719-103197194	NOTEST	0.112755	0.0632443	-0.834183	0	1	1	no	0.834183
ENSMUSG00000000560	Gabra2	chr5:71352295-71487088	NOTEST	0.00763604	0.0385791	2.33692	0	1	1	no	-2.33692
ENSMUSG00000000561	Wdr77	chr3:105745615-105790341	OK	2.98418	4.42552	0.568512	0.362174	0.50785	0.999355	no	-0.568512
ENSMUSG00000000562	Adora3	chr3:105673775-105726954	NOTEST	0.0460308	0.0927014	1.00999	0	1	1	no	-1.00999
ENSMUSG00000000563	Atp5f1	chr3:105745615-105790341	OK	131.886	123.853	-0.0906626	-0.325125	0.63485	0.999355	no	0.0906626
ENSMUSG00000000567	Sox9	chr11:112643537-112649074	NOTEST	0.960597	1.89246	0.978257	0	1	1	no	-0.978257
ENSMUSG00000000568	Hnrnpd	chr5:100387444-100407957	OK	57.8554	48.0605	-0.267599	-0.812472	0.2543	0.999355	no	0.267599
ENSMUSG00000000579	Dynlt1c	chr17:6646958-6655064	NOTEST	0	0	0	0	1	1	no	0
ENSMUSG00000000581	C1d	chr11:17157581-17169179	OK	20.3989	17.925	-0.186522	-0.533185	0.421	0.999355	no	0.186522
ENSMUSG00000000594	Gm2a	chr11:54911616-54926531	NOTEST	1.56163	1.26431	-0.304703	0	1	1	no	0.304703
ENSMUSG00000000600	Krit1	chr5:3803164-3866596	OK	11.8489	11.3208	-0.0657748	-0.221056	0.7571	0.999355	no	0.0657748
ENSMUSG00000000605	Clcn4-2	chr7:7235026-7252222	OK	22.7349	21.1051	-0.107322	-0.40415	0.56485	0.999355	no	0.107322
ENSMUSG00000000606	Vmn2r88	chr14:51981349-52282628	NOTEST	0	0	0	0	1	1	no	0
ENSMUSG00000000617	Grm6	chr11:50664186-50679710	NOTEST	0.0185414	0.0240351	0.374391	0	1	1	no	-0.374391
ENSMUSG00000000627	Sema4f	chr6:82861878-82889763	NOTEST	0.0116648	0.0146177	0.325559	0	1	1	no	-0.325559
ENSMUSG00000000628	Hk2	chr6:82675018-82724448	OK	3.87188	2.50058	-0.630772	-1.02795	0.1301	0.829354	no	0.630772
ENSMUSG00000000631	Myo18a	chr11:77576747-77679482	OK	49.9113	50.2531	0.00984558	0.0177257	0.9713	0.999355	no	-0.00984558
ENSMUSG00000000632	Sez6	chr11:77744301-77792550	NOTEST	0.0289645	0.00643899	-2.16938	0	1	1	no	2.16938
ENSMUSG00000000673	Haao	chr17:84230695-84246130	NOTEST	0.203036	0.0891889	-1.1868	0	1	1	no	1.1868
ENSMUSG00000000682	Cd52	chr4:133621826-133650997	OK	10.4131	9.41754	-0.144977	-0.102801	0.87955	0.999355	no	0.144977
ENSMUSG00000000686	Abhd15	chr11:77321600-77421317	NOTEST	1.01394	0.841467	-0.268997	0	1	1	no	0.268997
ENSMUSG00000000690	Hoxb6	chr11:96152337-96168224	NOTEST	0.135079	0.21074	0.641664	0	1	1	no	-0.641664
ENSMUSG00000000693	Loxl3	chr6:82984166-83007674	NOTEST	0.0458766	0.12343	1.42786	0	1	1	no	-1.42786
ENSMUSG00000000701	Tcl1b5	chr12:106414567-106419353	NOTEST	0	0	0	0	1	1	no	0
ENSMUSG00000000702	AC007307.1	chrNT_166433:11954-18898	NOTEST	0	0	0	0	1	1	no	0
ENSMUSG00000000706	Btn1a1	chr13:23548860-23557770	NOTEST	0.0043842	0.00342451	-0.356417	0	1	1	no	0.356417
ENSMUSG00000000708	Kat2b	chr17:53706185-53812045	OK	15.7764	14.5337	-0.118369	-0.262215	0.61075	0.999355	no	0.118369
ENSMUSG00000000711	Rab5b	chr10:128114248-128133324	OK	8.35801	8.1994	-0.0276416	-0.100249	0.88635	0.999355	no	0.0276416
ENSMUSG00000000724	Cryba1	chr11:77499640-77555294	NOTEST	0.0410719	0.116614	1.50552	0	1	1	no	-1.50552
ENSMUSG00000000730	Dnmt3l	chr10:77492766-77526367	NOTEST	0	0.0105177	inf	0	1	1	no	#VALUE!
ENSMUSG00000000731	Aire	chr10:77492766-77526367	NOTEST	0.0446741	0.00923182	-2.27475	0	1	1	no	2.27475
ENSMUSG00000000732	Icosl	chr10:77532104-77546000	OK	2.94419	2.93591	-0.00406298	-0.0123526	0.98645	0.999355	no	0.00406298
ENSMUSG00000000738	Spg7	chr8:122434259-126869624	OK	28.5984	32.4116	0.180575	0.0769763	0.83995	0.999355	no	-0.180575
ENSMUSG00000000739	Sult5a1	chr8:122434259-126869624	NOTEST	0	0	0	0	1	1	no	0
ENSMUSG00000000740	Rpl13	chr8:122434259-126869624	OK	2.81197	5.1209	0.864818	0.0984582	0.46715	0.999355	no	-0.864818
ENSMUSG00000000743	Chmp1a	chr8:122434259-126869624	OK	38.437	44.6623	0.216564	0.124302	0.8439	0.999355	no	-0.216564
ENSMUSG00000000751	Rpa1	chr11:75111667-75161826	OK	3.48761	3.5202	0.0134201	0.0384492	0.95315	0.999355	no	-0.0134201
ENSMUSG00000000753	Serpinf1	chr11:75223270-75236203	NOTEST	0.0339014	0.0334512	-0.0192891	0	1	1	no	0.0192891
ENSMUSG00000000759	Tubgcp3	chr8:12614276-12679229	OK	7.70684	8.91214	0.209632	0.63237	0.3446	0.999355	no	-0.209632
ENSMUSG00000000766	Oprm1	chr10:3294062-3605912	NOTEST	0	0.0052606	inf	0	1	1	no	#VALUE!
ENSMUSG00000000776	Polr3d	chr14:70838554-70843278	NOTEST	0.952371	0.942399	-0.0151858	0	1	1	no	0.0151858
ENSMUSG00000000782	Tcf7	chr11:51763383-52099681	NOTEST	0.953667	0.884575	-0.108501	0	1	1	no	0.108501
ENSMUSG00000000787	Ddx3x	chrX:12858095-12871178	OK	121.788	110.938	-0.134629	-0.444533	0.4928	0.999355	no	0.134629
ENSMUSG00000000791	Il12rb1	chr8:73332347-73345323	NOTEST	0.225518	0.317301	0.492612	0	1	1	no	-0.492612
ENSMUSG00000000792	Slc5a5	chr8:73406787-73416656	NOTEST	0.0472558	0.0375459	-0.331835	0	1	1	no	0.331835
ENSMUSG00000000794	Kcnn3	chr3:89324085-89471683	NOTEST	0	0	0	0	1	1	no	0
ENSMUSG00000000804	Usp32	chr11:84797943-84953663	OK	14.8292	14.2662	-0.0558324	-0.127055	0.8141	0.999355	no	0.0558324
ENSMUSG00000000811	Txnrd3	chr6:89593981-89625523	NOTEST	0.844011	0.681468	-0.308615	0	1	1	no	0.308615
ENSMUSG00000000817	Fasl	chr1:163710819-163718626	NOTEST	0.742503	1.02528	0.465549	0	1	1	no	-0.465549
ENSMUSG00000000823	Znf512b	chr2:181303853-181390365	OK	3.05348	3.02874	-0.0117358	-0.00904364	0.9832	0.999355	no	0.0117358
ENSMUSG00000000826	Dnajc5	chr2:181255189-181289838	OK	26.52	28.3314	0.0953203	0.304957	0.6384	0.999355	no	-0.0953203
ENSMUSG00000000827	Tpd52l2	chr2:181231846-181252671	OK	13.318	14.1631	0.0887593	0.247857	0.71975	0.999355	no	-0.0887593
ENSMUSG00000000838	Fmr1	chrX:65931715-65971138	OK	23.5446	18.3642	-0.3585	-1.0394	0.1486	0.88439	no	0.3585
ENSMUSG00000000861	Bcl11a	chr11:23978055-24074123	NOTEST	2.17476	1.65625	-0.392939	0	1	1	no	0.392939
ENSMUSG00000000869	Il4	chr11:53380880-53432171	NOTEST	0	0.0447889	inf	0	1	1	no	#VALUE!
ENSMUSG00000000876	Pxmp4	chr2:154411493-154429444	OK	7.44489	7.83876	0.0743754	0.181928	0.7902	0.999355	no	-0.0743754
ENSMUSG00000000881	Dlg3	chrX:97963060-98013749	OK	34.6842	38.23	0.140427	0.459133	0.45865	0.999355	no	-0.140427
ENSMUSG00000000884	Gnb1l	chr16:18498860-18566772	NOTEST	0.230424	0.207557	-0.150784	0	1	1	no	0.150784
ENSMUSG00000000889	Dbh	chr2:27020752-27038720	NOTEST	0	0	0	0	1	1	no	0
ENSMUSG00000000901	Mmp11	chr10:75385966-75403417	NOTEST	0.00685589	0.00511606	-0.42231	0	1	1	no	0.42231
ENSMUSG00000000902	Smarcb1	chr10:75359513-75384362	OK	9.09555	9.65646	0.0863342	0.257601	0.7076	0.999355	no	-0.0863342
ENSMUSG00000000903	Vpreb3	chr10:75405801-75412402	NOTEST	0.28004	0.312652	0.158924	0	1	1	no	-0.158924
ENSMUSG00000000915	Hip1r	chr5:124423636-124453220	OK	33.2393	29.2685	-0.183545	-0.640448	0.3261	0.999355	no	0.183545
ENSMUSG00000000916	Nsun5	chr5:135845822-135870416	NOTEST	1.72729	2.00321	0.213809	0	1	1	no	-0.213809
ENSMUSG00000000934	Top1mt	chr15:75487464-75509230	NOTEST	0.163484	0.302945	0.889908	0	1	1	no	-0.889908
ENSMUSG00000000938	Hoxa10	chr6:52181195-52190853	NOTEST	0	0.0201219	inf	0	1	1	no	#VALUE!
ENSMUSG00000000942	Hoxa4	chr6:52112349-52171853	NOTEST	0.0416644	0.0168091	-1.30958	0	1	1	no	1.30958
ENSMUSG00000000948	Snrpn	chr7:67127387-67285105	OK	8.93154	9.55094	0.096734	0.329368	0.6357	0.999355	no	-0.096734
ENSMUSG00000000957	Mmp14	chr14:55050440-55060095	NOTEST	2.19055	1.05371	-1.05582	0	1	1	no	1.05582
ENSMUSG00000000958	Slc7a7	chr14:54980524-55032856	OK	154.805	170.979	0.143372	0.522299	0.46475	0.999355	no	-0.143372
ENSMUSG00000000959	Oxa1l	chr14:54980524-55032856	OK	13.3648	12.0521	-0.149152	-0.160365	0.8199	0.999355	no	0.149152
ENSMUSG00000000976	Heatr6	chr11:83567197-83597256	OK	8.89053	11.1995	0.333088	1.00585	0.101	0.749423	no	-0.333088
ENSMUSG00000000982	Ccl3	chr11:83461345-83462857	NOTEST	0.969695	0.921777	-0.0731134	0	1	1	no	0.0731134
ENSMUSG00000000983	Expi	chr11:83522516-83524850	NOTEST	0.0391742	0	#NAME?	0	1	1	no	#NAME?
ENSMUSG00000001014	Icam4	chr9:20820403-20843480	NOTEST	0.0464727	0.047058	0.0180559	0	1	1	no	-0.0180559
ENSMUSG00000001016	Ilf2	chr3:90280122-90294955	OK	4.16901	4.19781	0.00993399	0.0229074	0.9759	0.999355	no	-0.00993399
ENSMUSG00000001017	2500003M10Rik	chr3:90302877-90313420	OK	15.395	15.5188	0.0115496	0.0399071	0.95405	0.999355	no	-0.0115496
ENSMUSG00000001018	Snapin	chr3:90280122-90294955	OK	6.83861	6.93893	0.0210092	0.0503481	0.94485	0.999355	no	-0.0210092
ENSMUSG00000001020	S100a4	chr3:90407691-90409967	NOTEST	0.0264088	0.107867	2.03017	0	1	1	no	-2.03017
ENSMUSG00000001021	S100a3	chr3:90404136-90406624	NOTEST	0.0226625	0.0161988	-0.484415	0	1	1	no	0.484415
ENSMUSG00000001023	S100a5	chr3:90412444-90415702	NOTEST	0	0	0	0	1	1	no	0
ENSMUSG00000001025	S100a6	chr3:90416815-90418336	OK	31.1652	47.5483	0.609459	2.23898	0.0022	0.057906	no	-0.609459
ENSMUSG00000001027	Scn4a	chr11:106179905-106210703	NOTEST	0	0	0	0	1	1	no	0
ENSMUSG00000001029	Icam2	chr11:106238969-106249389	NOTEST	0.2975	0.361896	0.282688	0	1	1	no	-0.282688
ENSMUSG00000001034	Mapk7	chr11:61298932-61307908	OK	3.08795	2.84801	-0.116696	-0.220495	0.7472	0.999355	no	0.116696
ENSMUSG00000001036	Epn2	chr11:61330750-61393187	NOTEST	1.00698	0.925599	-0.12157	0	1	1	no	0.12157
ENSMUSG00000001039	B9d1	chr11:61318645-61326433	NOTEST	0.356924	0.0847994	-2.07349	0	1	1	no	2.07349
ENSMUSG00000001052	Sec24b	chr3:129685676-129764471	OK	16.7801	17.9884	0.100316	0.211781	0.75275	0.999355	no	-0.100316
ENSMUSG00000001053	N4bp3	chr11:51456564-51464344	NOTEST	0.146817	0.288463	0.974362	0	1	1	no	-0.974362
ENSMUSG00000001054	Rmnd5b	chr11:51433236-51449398	OK	5.27411	5.37022	0.0260554	0.0666462	0.92615	0.999355	no	-0.0260554
ENSMUSG00000001056	Nhp2	chr11:51433236-51449398	OK	3.07368	3.59644	0.226603	0.357616	0.61045	0.999355	no	-0.226603
ENSMUSG00000001062	1300018I17Rik	chr8:122434259-126869624	OK	5.95819	6.69347	0.167881	0.0320472	0.8012	0.999355	no	-0.167881
ENSMUSG00000001065	Zfp276	chr8:122434259-126869624	OK	7.93819	9.56712	0.269273	0.0724828	0.7786	0.999355	no	-0.269273
ENSMUSG00000001076	C1ql4	chr15:98915116-98918248	NOTEST	0	0	0	0	1	1	no	0
ENSMUSG00000001082	Mfsd10	chr5:34976290-34979861	OK	3.01115	3.58279	0.250771	0.549454	0.41905	0.999355	no	-0.250771
ENSMUSG00000001089	Luzp1	chr4:136025675-136158638	OK	53.5856	46.2153	-0.213475	-0.454521	0.31645	0.999355	no	0.213475
ENSMUSG00000001095	Slc13a2	chr11:78207986-78235719	OK	89.9483	130.847	0.540709	1.95807	0.00485	0.108399	no	-0.540709
ENSMUSG00000001098	Kctd10	chr5:114764949-114830524	OK	12.9959	13.1311	0.0149338	0.0530362	0.9385	0.999355	no	-0.0149338
ENSMUSG00000001100	Poldip2	chr11:78325694-78336238	OK	10.0704	8.42822	-0.256814	-0.79529	0.2526	0.999355	no	0.256814
ENSMUSG00000001103	Sebox	chr11:78316950-78318583	NOTEST	0	0	0	0	1	1	no	0
ENSMUSG00000001105	Ift20	chr11:78349862-78355239	OK	84.7688	79.84	-0.0864215	-0.314056	0.6587	0.999355	no	0.0864215
ENSMUSG00000001119	Col6a1	chr10:76171536-76188913	NOTEST	0.113638	0.0505449	-1.16881	0	1	1	no	1.16881
ENSMUSG00000001120	Pcbp3	chr10:76224601-76424632	NOTEST	0.0705255	0.0523994	-0.428596	0	1	1	no	0.428596
ENSMUSG00000001123	Lgals9	chr11:78776475-78798448	OK	305.604	221.147	-0.466656	-1.73962	0.01365	0.227154	no	0.466656
ENSMUSG00000001127	Araf	chrX:20374939-20498130	OK	28.9532	29.3208	0.0182023	0.0544022	0.93935	0.999355	no	-0.0182023
ENSMUSG00000001128	Cfp	chrX:20502579-20508681	NOTEST	0.445784	0.501237	0.169146	0	1	1	no	-0.169146
ENSMUSG00000001131	Timp1	chrX:20374939-20498130	NOTEST	0.0192605	0	#NAME?	0	1	1	no	#NAME?
ENSMUSG00000001134	Uxt	chrX:20510520-20563863	NOTEST	2.43327	1.864	-0.384494	0	1	1	no	0.384494
ENSMUSG00000001138	Cnnm3	chr1:36568711-36585082	NOTEST	2.32017	2.11038	-0.136729	0	1	1	no	0.136729
ENSMUSG00000001143	Lman2l	chr1:36473732-36502116	OK	3.42916	3.77748	0.139571	0.372387	0.59055	0.999355	no	-0.139571
ENSMUSG00000001150	Mcm3ap	chr10:75911825-75978601	OK	5.29487	5.53084	0.0629041	0.224405	0.74915	0.999355	no	-0.0629041
ENSMUSG00000001151	Pcnt	chr10:75813998-75905657	OK	3.99745	3.69499	-0.113509	-0.420824	0.56085	0.999355	no	0.113509
ENSMUSG00000001155	Ftcd	chr10:76038392-76053083	NOTEST	0	0	0	0	1	1	no	0
ENSMUSG00000001156	Mxd1	chr6:86597037-86619153	OK	231.388	240.972	0.0585525	0.209916	0.7696	0.999355	no	-0.0585525
ENSMUSG00000001157	Gmcl1	chr6:86641761-86683372	OK	19.644	20.8114	0.0832865	0.293669	0.661	0.999355	no	-0.0832865
ENSMUSG00000001158	Snrnp27	chr6:86625214-86634516	OK	11.6309	11.8113	0.022205	0.0714207	0.92105	0.999355	no	-0.022205
ENSMUSG00000001166	Oas1c	chr5:121250101-121262523	NOTEST	1.0907	0.709158	-0.621071	0	1	1	no	0.621071
ENSMUSG00000001168	Oas1h	chr5:121311429-121323521	NOTEST	0.239534	0.188747	-0.34378	0	1	1	no	0.34378
ENSMUSG00000001173	Ocrl	chrX:45265563-45319045	NOTEST	2.03398	1.75095	-0.216169	0	1	1	no	0.216169
ENSMUSG00000001175	Calm1	chr12:101437644-101448024	OK	756.781	764.839	0.0152806	0.0326302	0.96225	0.999355	no	-0.0152806
ENSMUSG00000001211	Agpat3	chr10:77731922-77815234	OK	48.3399	34.0916	-0.503796	-1.66304	0.0116	0.206108	no	0.503796
ENSMUSG00000001225	Slc26a3	chr12:32075735-32158782	OK	133.471	143.049	0.0999849	0.359658	0.59965	0.999355	no	-0.0999849
ENSMUSG00000001227	Sema6b	chr17:56262507-56279766	NOTEST	1.443	1.50889	0.0644131	0	1	1	no	-0.0644131
ENSMUSG00000001228	Uhrf1	chr17:56442743-56462909	NOTEST	0.905293	0.756145	-0.259723	0	1	1	no	0.259723
ENSMUSG00000001229	Dpp9	chr17:56326104-56358312	OK	7.9428	8.49399	0.0967951	0.35929	0.6254	0.999355	no	-0.0967951
ENSMUSG00000001240	Ramp2	chr11:101107341-101120863	NOTEST	0.0494315	0.160966	1.70325	0	1	1	no	-1.70325
ENSMUSG00000001247	Lsr	chr7:31730270-31774739	OK	99.4897	97.0736	-0.0354675	-0.128308	0.86165	0.999355	no	0.0354675
ENSMUSG00000001248	Gramd1a	chr7:31915145-31937726	NOTEST	1.68353	2.09201	0.313404	0	1	1	no	-0.313404
ENSMUSG00000001249	Hpn	chr7:31883743-31900309	NOTEST	0.124503	0	#NAME?	0	1	1	no	#NAME?
ENSMUSG00000001260	Gabrg1	chr5:71142285-71233856	NOTEST	0	0	0	0	1	1	no	0
ENSMUSG00000001270	Ckb	chr12:112907565-112910549	OK	67.7613	65.966	-0.0387404	-0.152968	0.832	0.999355	no	0.0387404
ENSMUSG00000001280	Sp1	chr15:102236573-102266835	OK	19.6496	17.8557	-0.138121	-0.414507	0.4567	0.999355	no	0.138121
ENSMUSG00000001281	Itgb7	chr15:102046425-102062366	NOTEST	2.23806	2.3046	0.0422714	0	1	1	no	-0.0422714
ENSMUSG00000001285	Myg1	chr15:102156546-102168570	OK	9.87002	9.78361	-0.0126862	-0.0222852	0.9746	0.999355	no	0.0126862
ENSMUSG00000001288	Rarg	chr15:102065368-102087948	NOTEST	0.459527	0.225002	-1.03021	0	1	1	no	1.03021
ENSMUSG00000001289	Pfdn5	chr15:102156546-102168570	OK	38.9626	31.2249	-0.31939	-0.922514	0.189	0.951317	no	0.31939
ENSMUSG00000001300	Efnb2	chr8:8617433-8661239	OK	24.51	28.8873	0.237064	0.89075	0.20145	0.969475	no	-0.237064
ENSMUSG00000001305	Rrp15	chr1:188544856-188573237	NOTEST	0.727767	0.689994	-0.0768947	0	1	1	no	0.0768947
ENSMUSG00000001313	Rnd2	chr11:101320058-101333167	OK	8.73575	8.48732	-0.0416235	-0.0405403	0.9567	0.999355	no	0.0416235
ENSMUSG00000001323	Srr	chr11:74711572-74977950	OK	22.7647	17.1742	-0.406557	-1.05428	0.10085	0.749423	no	0.406557
ENSMUSG00000001333	Sync	chr4:128964860-129012614	NOTEST	0.147983	0.0536424	-1.46399	0	1	1	no	1.46399
ENSMUSG00000001334	Fndc5	chr4:128814242-128821837	NOTEST	0.141592	0.423957	1.58218	0	1	1	no	-1.58218
ENSMUSG00000001348	Acp5	chr9:21931174-21940190	OK	78.7798	68.8053	-0.195305	-0.748569	0.2924	0.999355	no	0.195305
ENSMUSG00000001349	Cnn1	chr9:21903724-21914074	NOTEST	0.0322628	0.0449751	0.479257	0	1	1	no	-0.479257
ENSMUSG00000001366	Fbxo9	chr9:77929305-77956872	OK	19.5955	23.8276	0.282114	0.746982	0.2793	0.999355	no	-0.282114
ENSMUSG00000001376	Ccdc132	chr6:3448381-3553319	OK	7.85152	6.69638	-0.229591	-0.650363	0.3312	0.999355	no	0.229591
ENSMUSG00000001379	Apbb3	chr18:36826334-36839020	OK	4.57364	5.6915	0.315468	0.499538	0.4889	0.999355	no	-0.315468
ENSMUSG00000001380	Hars	chr18:36926183-36952216	OK	9.90199	9.02341	-0.134046	-0.33991	0.63075	0.999355	no	0.134046
ENSMUSG00000001383	Zmat2	chr18:36953576-36959314	OK	14.0724	14.0015	-0.00728792	-0.0265135	0.97145	0.999355	no	0.00728792
ENSMUSG00000001403	Ube2c	chr2:164595397-164605467	OK	3.10771	3.27493	0.075615	0.171347	0.804	0.999355	no	-0.075615
ENSMUSG00000001415	Smg5	chr3:88140181-88166259	OK	8.90287	9.83855	0.144175	0.537416	0.45045	0.999355	no	-0.144175
ENSMUSG00000001416	Cct3	chr3:88101037-88125689	OK	19.1805	23.5341	0.295111	0.774451	0.2696	0.999355	no	-0.295111
ENSMUSG00000001417	Rhbg	chr3:88046795-88100921	OK	12.9426	14.3005	0.14394	0.502263	0.48	0.999355	no	-0.14394
ENSMUSG00000001418	0610031J06Rik	chr3:88128944-88138426	OK	91.0077	87.1392	-0.0626658	-0.179022	0.8067	0.999355	no	0.0626658
ENSMUSG00000001419	Mef2d	chr3:87946293-87981707	OK	15.3279	15.4444	0.0109214	0.0252485	0.96575	0.999355	no	-0.0109214
ENSMUSG00000001420	Tmem79	chr3:88128944-88138426	OK	12.0767	11.6865	-0.0473894	-0.0848287	0.9069	0.999355	no	0.0473894
ENSMUSG00000001424	Snd1	chr6:28425138-28885162	OK	24.9065	23.8186	-0.0644328	-0.187227	0.7466	0.999355	no	0.0644328
ENSMUSG00000001435	Col18a1	chr10:76494985-76629293	NOTEST	0.0921814	0.0525468	-0.810873	0	1	1	no	0.810873
ENSMUSG00000001440	Kpnb1	chr11:97021027-97049195	OK	25.5433	25.3987	-0.00819119	-0.0184391	0.97935	0.999355	no	0.00819119
ENSMUSG00000001441	Npepps	chr11:97067155-97144211	OK	65.8337	61.0731	-0.108289	-0.276551	0.62035	0.999355	no	0.108289
ENSMUSG00000001444	Tbx21	chr11:96959384-96976645	NOTEST	0.354383	0.238192	-0.573183	0	1	1	no	0.573183
ENSMUSG00000001445	Mrpl10	chr11:96902873-96930218	OK	16.7214	15.6222	-0.0981064	-0.261541	0.712	0.999355	no	0.0981064
ENSMUSG00000001472	Tcf25	chr8:122434259-126869624	OK	56.8102	59.4683	0.0659699	0.0532601	0.9398	0.999355	no	-0.0659699
ENSMUSG00000001473	Tubb6	chr18:67550370-67562402	OK	4.03587	5.35545	0.408128	1.25234	0.07845	0.669119	no	-0.408128
ENSMUSG00000001482	Def8	chr8:122434259-126869624	OK	6.3214	7.68281	0.28139	0.0808194	0.8455	0.999355	no	-0.28139
ENSMUSG00000001493	Meox1	chr11:101738823-101755688	NOTEST	0	0	0	0	1	1	no	0
ENSMUSG00000001494	Sost	chr11:101823771-101828329	NOTEST	0	0	0	0	1	1	no	0
ENSMUSG00000001496	Nkx2-1	chr12:57632921-57637895	NOTEST	0	0	0	0	1	1	no	0
ENSMUSG00000001497	Pax9	chr12:57790904-58298459	NOTEST	0	0	0	0	1	1	no	0
ENSMUSG00000001504	Irx2	chr13:72766244-72771644	NOTEST	0	0.0529125	inf	0	1	1	no	#VALUE!
ENSMUSG00000001506	Col1a1	chr11:94797537-94814356	NOTEST	0.0400849	0.0371437	-0.109942	0	1	1	no	0.109942
ENSMUSG00000001507	Itga3	chr11:94905787-94938115	OK	55.6671	52.0571	-0.0967282	-0.31535	0.61685	0.999355	no	0.0967282
ENSMUSG00000001508	Sgca	chr11:94824104-94837641	NOTEST	0	0.0158371	inf	0	1	1	no	#VALUE!
ENSMUSG00000001510	Dlx3	chr11:94981402-94986610	NOTEST	0.0102876	0.0129637	0.333571	0	1	1	no	-0.333571
ENSMUSG00000001517	Foxm1	chr6:128312984-128358950	NOTEST	1.2304	1.28259	0.0599252	0	1	1	no	-0.0599252
ENSMUSG00000001518	Itfg2	chr6:128359461-128374949	NOTEST	1.65049	1.62794	-0.0198495	0	1	1	no	0.0198495
ENSMUSG00000001520	Nrip2	chr6:128312984-128358950	NOTEST	0.153547	0.15945	0.0544239	0	1	1	no	-0.0544239
ENSMUSG00000001521	Tulp3	chr6:128271157-128305869	NOTEST	0.227511	0.147586	-0.624375	0	1	1	no	0.624375
ENSMUSG00000001524	Gtf2h4	chr17:35804674-35810684	OK	2.71213	2.84905	0.0710528	0.152785	0.8184	0.999355	no	-0.0710528
ENSMUSG00000001525	Tubb5	chr17:35970870-35975251	OK	8.81432	9.75789	0.146719	0.499551	0.4615	0.999355	no	-0.146719
ENSMUSG00000001542	Ell2	chr13:75844931-75909804	OK	43.1884	46.4778	0.105898	0.401475	0.56575	0.999355	no	-0.105898
ENSMUSG00000001552	Jup	chr11:100230271-100259077	OK	100.921	96.4555	-0.0652873	-0.178041	0.7774	0.999355	no	0.0652873
ENSMUSG00000001555	Fkbp10	chr11:100277010-100303122	NOTEST	0.0306273	0.0292751	-0.0651439	0	1	1	no	0.0651439
ENSMUSG00000001558	Klhl10	chr11:100303230-100318336	NOTEST	0	0.00626293	inf	0	1	1	no	#VALUE!
ENSMUSG00000001566	Mnx1	chr5:29799577-29805059	NOTEST	0.107309	0.0653959	-0.714503	0	1	1	no	0.714503
ENSMUSG00000001569	Nom1	chr5:29761203-29780046	OK	3.09788	3.76745	0.282307	0.518547	0.45075	0.999355	no	-0.282307
ENSMUSG00000001576	Ergic1	chr17:26691198-26793876	OK	6.88437	5.60243	-0.297272	-0.921526	0.1589	0.909209	no	0.297272
ENSMUSG00000001583	Tnk1	chr11:69659877-69672232	OK	11.2533	13.3815	0.249886	0.839279	0.24025	0.999355	no	-0.249886
ENSMUSG00000001588	Acap1	chr11:69695068-69709041	NOTEST	2.48559	2.69725	0.117899	0	1	1	no	-0.117899
ENSMUSG00000001604	Tcea3	chr4:135803643-135830813	OK	14.3679	10.7739	-0.415305	-1.40616	0.0419	0.478128	no	0.415305
ENSMUSG00000001622	Csn3	chr5:88354603-88361690	NOTEST	0	0	0	0	1	1	no	0
ENSMUSG00000001627	Ifrd1	chr12:40928153-40975091	OK	124.195	131.81	0.0858528	0.277586	0.69065	0.999355	no	-0.0858528
ENSMUSG00000001630	Stk38l	chr6:146673516-146727334	NOTEST	1.66033	1.58857	-0.06374	0	1	1	no	0.06374
ENSMUSG00000001632	Brpf1	chr6:113257174-113276741	OK	5.19543	6.32887	0.284703	0.750539	0.2433	0.999355	no	-0.284703
ENSMUSG00000001642	Akr1b3	chr6:34240264-34274249	NOTEST	0.692924	0.674313	-0.0392781	0	1	1	no	0.0392781
ENSMUSG00000001655	Hoxc13	chr15:102751533-102759245	NOTEST	0	0	0	0	1	1	no	0
ENSMUSG00000001656	Hoxc11	chr15:102784857-102788139	NOTEST	0	0	0	0	1	1	no	0
ENSMUSG00000001657	Hoxc8	chr15:102797226-102847860	NOTEST	0	0	0	0	1	1	no	0
ENSMUSG00000001661	Hoxc6	chr15:102797226-102847860	NOTEST	0	0.00765706	inf	0	1	1	no	#VALUE!
ENSMUSG00000001663	Gstt1	chr10:75246557-75261329	OK	54.7337	50.3373	-0.120801	-0.449034	0.532	0.999355	no	0.120801
ENSMUSG00000001665	Gstt3	chr10:75233974-75244159	OK	20.268	20.3225	0.0038774	0.0104378	0.98835	0.999355	no	-0.0038774
ENSMUSG00000001666	Ddt	chr10:75233974-75244159	OK	26.6373	35.0255	0.39496	0.874908	0.24365	0.999355	no	-0.39496
ENSMUSG00000001670	Tat	chr8:112514336-112523703	NOTEST	0.166516	0.0619431	-1.42664	0	1	1	no	1.42664
ENSMUSG00000001672	Marveld3	chr8:112471813-112486103	OK	35.8463	33.6583	-0.0908623	-0.301926	0.66915	0.999355	no	0.0908623
ENSMUSG00000001674	Ddx18	chr1:123450411-123464566	NOTEST	1.43603	1.44262	0.00660186	0	1	1	no	-0.00660186
ENSMUSG00000001687	Ubl3	chr5:149316206-149364365	OK	34.7452	33.7676	-0.0411717	-0.155329	0.821	0.999355	no	0.0411717
ENSMUSG00000001700	Gramd3	chr18:56559990-56663446	OK	95.3626	81.4575	-0.227376	-0.858153	0.22325	0.999355	no	0.227376
ENSMUSG00000001707	Eef1e1	chr13:38737566-38750897	OK	4.91873	4.6292	-0.0875234	-0.2258	0.7513	0.999355	no	0.0875234
ENSMUSG00000001729	Akt1	chr12:113892031-113913095	OK	15.2591	16.2823	0.0936404	0.298701	0.6592	0.999355	no	-0.0936404
ENSMUSG00000001739	Cldn15	chr5:137442485-137451728	OK	396.375	425.322	0.101691	0.363799	0.60095	0.999355	no	-0.101691
ENSMUSG00000001741	Il16	chr7:90780468-90894236	NOTEST	0.875828	0.732116	-0.258575	0	1	1	no	0.258575
ENSMUSG00000001750	Tcirg1	chr19:3896049-3907133	OK	17.0333	16.941	-0.00783694	-0.0205092	0.9772	0.999355	no	0.00783694
ENSMUSG00000001751	Naglu	chr11:100931325-100938986	OK	6.5658	5.9653	-0.138375	-0.467949	0.51195	0.999355	no	0.138375
ENSMUSG00000001755	Coasy	chr11:100943878-100947933	OK	10.2528	9.30674	-0.139675	-0.477581	0.4967	0.999355	no	0.139675
ENSMUSG00000001761	Smo	chr6:29685693-29711365	NOTEST	0.121431	0.0843789	-0.525185	0	1	1	no	0.525185
ENSMUSG00000001763	Tspan33	chr6:29644221-29668559	NOTEST	0.0105815	0.0178422	0.753752	0	1	1	no	-0.753752
ENSMUSG00000001767	Crnkl1	chr2:145743214-146040775	OK	8.27428	7.08415	-0.224038	-0.682557	0.3171	0.999355	no	0.224038
ENSMUSG00000001768	Rin2	chr2:145610469-145713352	OK	7.15377	6.65547	-0.104165	-0.359425	0.5874	0.999355	no	0.104165
ENSMUSG00000001773	Folh1	chr7:93867861-93924374	NOTEST	0	0	0	0	1	1	no	0
ENSMUSG00000001774	Chordc1	chr9:18096710-18118444	OK	20.2618	24.6983	0.285647	1.05155	0.13825	0.853471	no	-0.285647
ENSMUSG00000001783	D10Wsu52e	chr10:85391235-85420568	OK	25.4924	26.1405	0.0362195	0.134371	0.85155	0.999355	no	-0.0362195
ENSMUSG00000001785	Pwp1	chr10:85334575-85351841	OK	2.36979	2.87263	0.277613	0.788526	0.2494	0.999355	no	-0.277613
ENSMUSG00000001786	Fbxo7	chr10:85484716-85514618	OK	9.22447	9.85738	0.0957381	0.23244	0.73865	0.999355	no	-0.0957381
ENSMUSG00000001794	Capns1	chr7:30971960-30980183	OK	91.3143	80.5916	-0.180211	-0.579893	0.41185	0.999355	no	0.180211
ENSMUSG00000001802	Lrp3	chr7:35971403-36000389	NOTEST	0.0920487	0.147987	0.684999	0	1	1	no	-0.684999
ENSMUSG00000001804	Dsg4	chr18:20594675-20630322	NOTEST	0.42867	0.373141	-0.200145	0	1	1	no	0.200145
ENSMUSG00000001815	Evx2	chr2:74491048-74497918	NOTEST	0	0	0	0	1	1	no	0
ENSMUSG00000001819	Hoxd13	chr2:74506366-74509656	NOTEST	0	0	0	0	1	1	no	0
ENSMUSG00000001823	Hoxd12	chr2:74512985-74515763	NOTEST	0	0	0	0	1	1	no	0
ENSMUSG00000001827	Folr1	chr7:109006844-109019302	NOTEST	0.18465	0.458705	1.31277	0	1	1	no	-1.31277
ENSMUSG00000001829	Clpb	chr7:108812146-108943974	OK	2.69639	2.59669	-0.0543524	-0.141503	0.83205	0.999355	no	0.0543524
ENSMUSG00000001833	2016-09-07	chr9:25056203-25116150	OK	62.4247	50.9344	-0.293475	-1.14394	0.11375	0.785255	no	0.293475
ENSMUSG00000001844	Zdhhc4	chr5:144078167-144094383	OK	7.48981	7.66466	0.0332932	0.0985213	0.89615	0.999355	no	-0.0332932
ENSMUSG00000001847	Rac1	chr5:144266345-144288904	OK	117.162	131.872	0.17064	0.641525	0.3563	0.999355	no	-0.17064
ENSMUSG00000001855	Nup214	chr2:31829955-31940377	OK	4.72255	5.14068	0.122396	0.126124	0.7747	0.999355	no	-0.122396
ENSMUSG00000001864	Aif1l	chr2:31805779-31828962	NOTEST	0.0317844	0.0208525	-0.608096	0	1	1	no	0.608096
ENSMUSG00000001865	Cpa3	chr3:20115515-20142080	NOTEST	0.0792358	0.169933	1.10074	0	1	1	no	-1.10074
ENSMUSG00000001870	Ltbp1	chr17:75404907-75791852	NOTEST	0.0757432	0.0485417	-0.641891	0	1	1	no	0.641891
ENSMUSG00000001891	Ugp2	chr11:21221140-21274164	OK	57.208	56.517	-0.0175321	-0.0607685	0.9278	0.999355	no	0.0175321
ENSMUSG00000001901	Kcnh6	chr11:105869437-105895863	NOTEST	0.474545	0.709573	0.580407	0	1	1	no	-0.580407
ENSMUSG00000001909	Trmt1	chr8:87194381-87223707	OK	6.54272	7.99043	0.288383	0.316924	0.58025	0.999355	no	-0.288383
ENSMUSG00000001910	Nacc1	chr8:87194381-87223707	OK	11.4228	11.6242	0.0252136	0.0881882	0.89815	0.999355	no	-0.0252136
ENSMUSG00000001911	Nfix	chr8:87223774-87324243	NOTEST	1.69791	2.67646	0.656569	0	1	1	no	-0.656569
ENSMUSG00000001918	Slc1a5	chr7:17366694-17383623	OK	7.1594	8.67673	0.277312	0.73724	0.2568	0.999355	no	-0.277312
ENSMUSG00000001924	Uba1	chrX:20235451-20260305	OK	77.542	73.2608	-0.0819369	-0.217111	0.74105	0.999355	no	0.0819369
ENSMUSG00000001930	Vwf	chr6:125496791-125636697	NOTEST	0.0202571	0.0440826	1.12178	0	1	1	no	-1.12178
ENSMUSG00000001942	Siae	chr9:37421431-37455903	OK	38.8437	33.0921	-0.231194	-0.876606	0.2093	0.979403	no	0.231194
ENSMUSG00000001943	Vsig2	chr9:37346839-37351790	NOTEST	0.0338557	0.113953	1.75097	0	1	1	no	-1.75097
ENSMUSG00000001946	Esam	chr9:37335662-37345904	NOTEST	0.17347	0.228747	0.399064	0	1	1	no	-0.399064
ENSMUSG00000001948	Spa17	chr9:37410885-37421199	OK	2.25122	2.79008	0.309598	0.604869	0.3845	0.999355	no	-0.309598
ENSMUSG00000001962	Fam50a	chrX:71558371-71565488	OK	8.36432	7.95682	-0.0720562	-0.222125	0.75085	0.999355	no	0.0720562
ENSMUSG00000001964	Emd	chrX:71500025-71506887	OK	6.23052	7.02227	0.172587	0.490594	0.48775	0.999355	no	-0.172587
ENSMUSG00000001983	Taco1	chr11:105926390-105934926	OK	7.88451	7.9407	0.0102466	0.032779	0.9644	0.999355	no	-0.0102466
ENSMUSG00000001985	Grik3	chr4:125167943-125391417	NOTEST	0.0219503	0.0241123	0.135529	0	1	1	no	-0.135529
ENSMUSG00000001986	Gria3	chrX:38754030-39031778	NOTEST	0.0096718	0.00737178	-0.391771	0	1	1	no	0.391771
ENSMUSG00000001988	Npas1	chr7:17041069-17062129	NOTEST	0.0785632	0.202043	1.36273	0	1	1	no	-1.36273
ENSMUSG00000001995	Sipa1l2	chr8:127941962-128016610	NOTEST	2.26255	2.01266	-0.168845	0	1	1	no	0.168845
ENSMUSG00000001998	Ap4e1	chr2:126834452-126893645	OK	4.33209	4.3547	0.00751065	0.0203194	0.9755	0.999355	no	-0.00751065
ENSMUSG00000001999	Blvra	chr2:126896400-126922820	OK	8.16727	9.4971	0.217634	0.685463	0.3322	0.999355	no	-0.217634
ENSMUSG00000002006	Pdzd4	chrX:71038697-71070308	NOTEST	0.0923215	0.105737	0.195737	0	1	1	no	-0.195737
ENSMUSG00000002007	Srpk3	chrX:71019743-71024264	NOTEST	0.169823	0.244649	0.526681	0	1	1	no	-0.526681
ENSMUSG00000002010	Idh3g	chrX:71024301-71032236	OK	54.8629	51.6567	-0.086876	-0.322294	0.64715	0.999355	no	0.086876
ENSMUSG00000002012	Pnck	chrX:70901332-70905456	NOTEST	0.0687294	0.033737	-1.0266	0	1	1	no	1.0266
ENSMUSG00000002014	Ssr4	chrX:71032366-71036169	OK	53.1089	51.2919	-0.0502208	-0.178651	0.80755	0.999355	no	0.0502208
ENSMUSG00000002015	Bcap31	chrX:70931516-70961514	OK	138.465	139.07	0.00628989	0.0241342	0.97165	0.999355	no	-0.00628989
ENSMUSG00000002017	Fam98a	chr17:75936425-75951286	OK	9.57042	8.36337	-0.194497	-0.55497	0.4158	0.999355	no	0.194497
ENSMUSG00000002020	Ltbp2	chr12:86124161-86219082	NOTEST	0.0925264	0.126574	0.452039	0	1	1	no	-0.452039
ENSMUSG00000002028	Mll1	chr9:44611437-44689379	OK	3.70991	4.2326	0.190157	0.674529	0.3092	0.999355	no	-0.190157
ENSMUSG00000002031	Ift46	chr9:44575990-44600797	OK	23.0145	24.7577	0.105336	0.246341	0.7204	0.999355	no	-0.105336
ENSMUSG00000002032	Tmem25	chr9:44601857-44607390	NOTEST	2.35769	2.33681	-0.0128315	0	1	1	no	0.0128315
ENSMUSG00000002033	Cd3g	chr9:44777654-44788514	OK	13.2856	12.8534	-0.0477077	-0.146415	0.8355	0.999355	no	0.0477077
ENSMUSG00000002043	Trappc6a	chr7:20094018-20101494	OK	10.5342	11.515	0.128437	0.413262	0.56615	0.999355	no	-0.128437
ENSMUSG00000002052	Supt6h	chr11:78020247-78068998	OK	17.4662	15.5433	-0.168276	-0.515893	0.4635	0.999355	no	0.168276
ENSMUSG00000002055	Spag5	chr11:78115030-78135959	NOTEST	2.45798	2.29929	-0.0962834	0	1	1	no	0.0962834
ENSMUSG00000002057	Foxn1	chr11:78171078-78200060	NOTEST	0	0.023622	inf	0	1	1	no	#VALUE!
ENSMUSG00000002058	Unc119	chr11:78156983-78162666	NOTEST	1.10407	1.05549	-0.0649188	0	1	1	no	0.0649188
ENSMUSG00000002059	Rab34	chr11:78001931-78005695	NOTEST	0.0553169	0.0289136	-0.935974	0	1	1	no	0.935974
ENSMUSG00000002064	Sdf2	chr11:78020247-78068998	OK	36.6832	43.1782	0.235185	0.471836	0.51495	0.999355	no	-0.235185
ENSMUSG00000002068	Ccne1	chr7:38883002-38892553	NOTEST	0.503538	0.497526	-0.0173284	0	1	1	no	0.0173284
ENSMUSG00000002076	Hsf2bp	chr17:32081713-32171453	NOTEST	0.0938386	0.112301	0.259124	0	1	1	no	-0.259124
ENSMUSG00000002083	Bbc3	chr7:16894964-16903554	OK	3.13591	2.62984	-0.253913	-0.543453	0.4405	0.999355	no	0.253913
ENSMUSG00000002100	Mybpc3	chr2:90958300-90976673	NOTEST	0	0	0	0	1	1	no	0
ENSMUSG00000002102	Psmc3	chr2:90894165-90910574	OK	44.0407	36.3518	-0.276807	-0.879026	0.21085	0.982185	no	0.276807
ENSMUSG00000002103	Acp2	chr2:91043041-91077139	OK	18.8983	17.2554	-0.131208	-0.420098	0.5302	0.999355	no	0.131208
ENSMUSG00000002104	Rapsn	chr2:90875776-90894090	NOTEST	0.0317824	0.0586797	0.884632	0	1	1	no	-0.884632
ENSMUSG00000002105	Slc39a13	chr2:90894165-90910574	NOTEST	0.947401	1.3014	0.45802	0	1	1	no	-0.45802
ENSMUSG00000002107	Celf2	chr2:6460750-7002359	NOTEST	1.15796	1.12873	-0.036883	0	1	1	no	0.036883
ENSMUSG00000002108	Nr1h3	chr2:91024217-91042991	OK	20.8187	23.1923	0.155763	0.548303	0.43155	0.999355	no	-0.155763
ENSMUSG00000002109	Ddb2	chr2:91043041-91077139	OK	3.06133	3.18748	0.0582555	0.0621766	0.9348	0.999355	no	-0.0582555
ENSMUSG00000002111	Sfpi1	chr2:90922546-90955913	NOTEST	0.240967	0.207987	-0.21234	0	1	1	no	0.21234
ENSMUSG00000002129	Sf3a1	chr11:4060352-4082544	OK	8.31735	7.53945	-0.141665	-0.439027	0.513	0.999355	no	0.141665
ENSMUSG00000002147	Stat6	chr10:127080041-127138105	OK	52.2336	52.3117	0.0021552	0.00586855	0.993	0.999355	no	-0.0021552
ENSMUSG00000002190	Clgn	chr8:85913765-85952451	NOTEST	0.0468117	0.0346818	-0.43269	0	1	1	no	0.43269
ENSMUSG00000002204	Napsa	chr7:51827801-51845994	NOTEST	0.848344	0.571163	-0.570747	0	1	1	no	0.570747
ENSMUSG00000002205	Vrk3	chr7:51986850-52032885	OK	21.5155	19.4113	-0.148478	-0.486353	0.48265	0.999355	no	0.148478
ENSMUSG00000002210	1500002O20Rik	chr7:25184637-25207797	OK	4.53824	5.40999	0.253493	0.745987	0.29365	0.999355	no	-0.253493
ENSMUSG00000002221	Paxip1	chr5:28067206-28117879	OK	2.72144	3.30182	0.278892	0.93508	0.18215	0.944386	no	-0.278892
ENSMUSG00000002222	Rmnd5a	chr6:71338627-71390631	OK	35.8675	41.9719	0.226743	0.782766	0.2332	0.999355	no	-0.226743
ENSMUSG00000002233	Rhoc	chr3:104591928-104597377	OK	124.833	109.098	-0.194377	-0.719518	0.2932	0.999355	no	0.194377
ENSMUSG00000002240	4930432K09Rik	chr5:88254710-88275411	NOTEST	0	0	0	0	1	1	no	0
ENSMUSG00000002249	Tead3	chr17:28468615-28487750	OK	5.89958	5.71298	-0.0463695	-0.139506	0.8444	0.999355	no	0.0463695
ENSMUSG00000002257	Def6	chr17:28344722-28365553	NOTEST	0.846765	0.667946	-0.34223	0	1	1	no	0.34223
ENSMUSG00000002265	Peg3	chr7:6656602-6683132	NOTEST	1.02841	1.0075	-0.0296341	0	1	1	no	0.0296341
ENSMUSG00000002266	Zim1	chr7:6628153-6649161	NOTEST	0.0292639	0.0202488	-0.531289	0	1	1	no	0.531289
ENSMUSG00000002274	Metrn	chr17:25931515-26122741	NOTEST	0.0630175	0.179269	1.5083	0	1	1	no	-1.5083
ENSMUSG00000002279	Lmf1	chr17:25716118-25799771	OK	3.21476	3.37872	0.0717659	0.19399	0.77785	0.999355	no	-0.0717659
ENSMUSG00000002280	Narfl	chr17:25910720-25922618	OK	5.89903	6.46041	0.131148	0.316505	0.5987	0.999355	no	-0.131148
ENSMUSG00000002290	Rab11b-ps2	chr19:7471990-7473611	OK	5.89998	6.13297	0.0558745	0.17781	0.8049	0.999355	no	-0.0558745
ENSMUSG00000002297	Dbf4	chr5:8396972-8422716	OK	2.72111	3.03585	0.157905	0.345197	0.61455	0.999355	no	-0.157905
ENSMUSG00000002307	Daxx	chr17:34046358-34052534	OK	11.2337	10.7646	-0.0615346	-0.149195	0.83275	0.999355	no	0.0615346
ENSMUSG00000002308	Cd320	chr17:33980035-33986719	NOTEST	0.68565	1.12802	0.718254	0	1	1	no	-0.718254
ENSMUSG00000002319	Ipo4	chr14:56244236-56262643	OK	4.09164	3.41648	-0.26017	-0.145591	0.76275	0.999355	no	0.26017
ENSMUSG00000002320	Tm9sf1	chr14:56244236-56262643	OK	52.0597	43.7585	-0.250603	-0.862217	0.2179	0.994846	no	0.250603
ENSMUSG00000002324	Rec8	chr14:56236873-56244232	OK	18.4221	14.7959	-0.316246	-1.0736	0.1175	0.797589	no	0.316246
ENSMUSG00000002325	Irf9	chr14:56210544-56228867	OK	23.5034	21.2532	-0.145188	-0.327708	0.6371	0.999355	no	0.145188
ENSMUSG00000002326	Gmpr2	chr14:56291071-56300654	OK	8.76267	9.25807	0.0793409	0.19188	0.7842	0.999355	no	-0.0793409
ENSMUSG00000002329	Mdp1	chr14:56276715-56279345	OK	26.1193	25.4448	-0.0377471	-0.139552	0.83585	0.999355	no	0.0377471
ENSMUSG00000002332	Dhrs1	chr14:56357856-56364527	OK	185.478	180.309	-0.040773	-0.133664	0.84775	0.999355	no	0.040773
ENSMUSG00000002341	Ncan	chr8:72616983-72644772	NOTEST	0	0.00289573	inf	0	1	1	no	#VALUE!
ENSMUSG00000002342	Tmem161a	chr8:72696254-72707580	OK	8.29792	9.22066	0.152119	0.458747	0.5029	0.999355	no	-0.152119
ENSMUSG00000002343	Armc6	chr8:72744070-72803814	NOTEST	2.13738	2.68972	0.331612	0	1	1	no	-0.331612
ENSMUSG00000002345	2310045N01Rik	chr8:72663397-72691387	OK	10.8722	13.8228	0.346408	1.07005	0.13495	0.842154	no	-0.346408
ENSMUSG00000002346	Slc25a42	chr8:72708238-72736204	OK	4.21685	4.56983	0.115974	0.38065	0.59235	0.999355	no	-0.115974
ENSMUSG00000002365	Snx9	chr17:5841345-5931946	OK	18.9871	17.6446	-0.105798	-0.396456	0.57155	0.999355	no	0.105798
ENSMUSG00000002372	Ranbp3	chr17:56812679-56851192	OK	9.03804	9.18558	0.0233613	0.0847841	0.9081	0.999355	no	-0.0233613
ENSMUSG00000002379	Ndufa11	chr17:56857184-56863671	OK	9.62933	10.2471	0.089715	0.326064	0.6509	0.999355	no	-0.089715
ENSMUSG00000002393	Nr2f6	chr8:73895196-73905859	OK	26.8587	29.6036	0.140385	0.407648	0.55375	0.999355	no	-0.140385
ENSMUSG00000002395	Use1	chr8:73890746-73893631	OK	27.3652	28.2079	0.0437593	0.15462	0.8283	0.999355	no	-0.0437593
ENSMUSG00000002396	Ocel1	chr8:73895196-73905859	OK	10.015	9.89193	-0.0178401	-0.0287265	0.962	0.999355	no	0.0178401
ENSMUSG00000002409	Dyrk1b	chr7:28964487-28972313	OK	6.62658	5.97377	-0.149623	-0.523305	0.4774	0.999355	no	0.149623
ENSMUSG00000002413	Braf	chr6:39523871-39675462	OK	3.83537	2.95638	-0.375536	-0.174961	0.419	0.999355	no	0.375536
ENSMUSG00000002416	Ndufb2	chr6:39523871-39675462	OK	44.9678	42.7121	-0.0742473	-0.151641	0.833	0.999355	no	0.0742473
ENSMUSG00000002428	Hltf	chr3:19957810-20018376	OK	8.72473	8.2445	-0.0816789	-0.269396	0.6953	0.999355	no	0.0816789
ENSMUSG00000002455	Prpf6	chr2:181303853-181390365	OK	14.1575	13.2236	-0.0984603	-0.239176	0.73605	0.999355	no	0.0984603
ENSMUSG00000002458	Rgs19	chr2:181423123-181428682	NOTEST	0.914861	0.590945	-0.630529	0	1	1	no	0.630529
ENSMUSG00000002459	Rgs20	chr1:4899656-5060366	NOTEST	0.0370086	0.024046	-0.622065	0	1	1	no	0.622065
ENSMUSG00000002477	Snrpd1	chr18:10617793-10628228	OK	5.28065	5.13939	-0.0391186	-0.10337	0.8868	0.999355	no	0.0391186
ENSMUSG00000002486	Tchp	chr5:115157768-115172336	NOTEST	1.42095	1.71966	0.275269	0	1	1	no	-0.275269
ENSMUSG00000002489	Tiam1	chr16:89787355-90144014	NOTEST	0.294983	0.339547	0.20298	0	1	1	no	-0.20298
ENSMUSG00000002496	Tsc2	chr17:24686894-24769574	OK	8.24014	7.61686	-0.113472	-0.352017	0.61725	0.999355	no	0.113472
ENSMUSG00000002500	Rpl3l	chr17:24864773-24873094	NOTEST	0.0105015	0	#NAME?	0	1	1	no	#NAME?
ENSMUSG00000002504	Slc9a3r2	chr17:24776226-24787250	NOTEST	0.158551	0.125263	-0.33999	0	1	1	no	0.33999
ENSMUSG00000002524	Puf60	chr15:75900613-75911376	OK	20.8457	19.5503	-0.0925604	-0.339928	0.6238	0.999355	no	0.0925604
ENSMUSG00000002546	Golga2	chr2:32134335-32163441	OK	25.0562	20.9916	-0.255355	-0.649736	0.2681	0.999355	no	0.255355
ENSMUSG00000002550	Uck1	chr2:32092109-32115679	OK	11.1377	10.4004	-0.0988184	-0.226471	0.74985	0.999355	no	0.0988184
ENSMUSG00000002578	Ikzf4	chr10:128067898-128086867	NOTEST	0.0917833	0.104252	0.183771	0	1	1	no	-0.183771
ENSMUSG00000002580	1810046J19Rik	chr11:98273783-98300360	OK	28.2612	33.0549	0.226041	0.253863	0.7296	0.999355	no	-0.226041
ENSMUSG00000002588	Pon1	chr6:5118089-5143946	NOTEST	0	0	0	0	1	1	no	0
ENSMUSG00000002602	Axl	chr7:26542291-26573724	NOTEST	0.184871	0.0593513	-1.63917	0	1	1	no	1.63917
ENSMUSG00000002603	Tgfb1	chr7:26472020-26490096	NOTEST	1.05892	0.711958	-0.572725	0	1	1	no	0.572725
ENSMUSG00000002608	Ccdc97	chr7:26496124-26504107	OK	11.1486	11.5316	0.0487315	0.123389	0.8542	0.999355	no	-0.0487315
ENSMUSG00000002617	Zfp40	chr17:23310835-23330219	NOTEST	0.738727	0.464305	-0.66997	0	1	1	no	0.66997
ENSMUSG00000002625	Akap8l	chr17:32458369-32487540	OK	6.12653	7.54681	0.300796	1.03636	0.1433	0.870093	no	-0.300796
ENSMUSG00000002633	Shh	chr5:28783354-29260535	NOTEST	0.150074	0.0979159	-0.61606	0	1	1	no	0.61606
ENSMUSG00000002635	Pdcd2l	chr7:34969517-34981680	OK	2.88502	2.84545	-0.0199271	-0.0472854	0.94565	0.999355	no	0.0199271
ENSMUSG00000002658	Gtf2f1	chr17:57142825-57150723	OK	26.6405	25.129	-0.0842665	-0.315998	0.6535	0.999355	no	0.0842665
ENSMUSG00000002660	Clpp	chr17:57129686-57135794	OK	6.24323	8.0088	0.359292	1.08843	0.12255	0.808696	no	-0.359292
ENSMUSG00000002661	Alkbh7	chr17:57136761-57138745	OK	6.94267	7.31603	0.0755716	0.214898	0.76205	0.999355	no	-0.0755716
ENSMUSG00000002664	Pspn	chr17:57138879-57139441	NOTEST	0.419222	0.247697	-0.759138	0	1	1	no	0.759138
ENSMUSG00000002668	Dennd1c	chr17:57205478-57217933	OK	4.97177	4.98355	0.00341443	0.0114719	0.9847	0.999355	no	-0.00341443
ENSMUSG00000002679	Med6	chr12:82674543-82695995	OK	13.4332	13.1875	-0.0266285	-0.0785289	0.90865	0.999355	no	0.0266285
ENSMUSG00000002688	Prkd1	chr12:51442217-51750210	NOTEST	0.0089673	0.00675744	-0.408198	0	1	1	no	0.408198
ENSMUSG00000002699	Lcp2	chr11:33529338-33998554	NOTEST	0.956287	1.19341	0.319576	0	1	1	no	-0.319576
ENSMUSG00000002718	Cse1l	chr2:166731539-166771889	OK	6.59164	7.3207	0.151344	0.391943	0.53925	0.999355	no	-0.151344
ENSMUSG00000002728	Naa20	chr2:145727834-145742161	OK	13.5349	12.9816	-0.060208	-0.1486	0.83105	0.999355	no	0.060208
ENSMUSG00000002731	Prkra	chr2:76467954-76486072	OK	20.9336	19.8966	-0.0732986	-0.245915	0.72765	0.999355	no	0.0732986
ENSMUSG00000002732	Fkbp7	chr2:76501100-76511173	NOTEST	0.887784	0.57182	-0.634648	0	1	1	no	0.634648
ENSMUSG00000002733	Plekha3	chr2:76513337-76534885	OK	12.118	13.8796	0.195818	0.678581	0.32435	0.999355	no	-0.195818
ENSMUSG00000002741	Ykt6	chr11:5855695-5867783	OK	52.6262	50.5994	-0.0566614	-0.198644	0.7706	0.999355	no	0.0566614
ENSMUSG00000002748	Baz1b	chr5:135663133-135721999	OK	10.6713	11.8343	0.149241	0.470982	0.4388	0.999355	no	-0.149241
ENSMUSG00000002763	Pex6	chr17:46579396-46968362	OK	13.1334	14.5787	0.150618	0.13344	0.8281	0.999355	no	-0.150618
ENSMUSG00000002767	Mrpl2	chr17:46579396-46968362	OK	13.3418	12.9398	-0.0441419	-0.022154	0.96765	0.999355	no	0.0441419
ENSMUSG00000002768	Mea1	chr17:46579396-46968362	OK	23.064	24.0094	0.057957	0.0426861	0.9485	0.999355	no	-0.057957
ENSMUSG00000002769	Gnmt	chr17:46579396-46968362	NOTEST	0.177817	0.251411	0.499658	0	1	1	no	-0.499658
ENSMUSG00000002771	Grin2d	chr7:53087252-53126298	NOTEST	2.2071	1.86359	-0.244065	0	1	1	no	0.244065
ENSMUSG00000002778	Kdelr1	chr7:53128141-53139101	OK	153.846	134.905	-0.189541	-0.687504	0.3398	0.999355	no	0.189541
ENSMUSG00000002781	Tmem143	chr7:53152310-53172783	OK	14.8238	14.0943	-0.072812	-0.205006	0.7644	0.999355	no	0.072812
ENSMUSG00000002791	Pdxk-ps	chr17:32213027-32237231	NOTEST	0.0150075	0.0130435	-0.202355	0	1	1	no	0.202355
ENSMUSG00000002797	Ggct	chr6:54932573-54942944	OK	4.01207	5.6851	0.50284	1.04882	0.13315	0.837177	no	-0.50284
ENSMUSG00000002799	Jag2	chr12:114146800-114167706	NOTEST	0.266483	0.246874	-0.110269	0	1	1	no	0.110269
ENSMUSG00000002803	Btbd6	chr12:114198072-114238832	OK	8.63251	8.71712	0.0140715	0.0355912	0.95965	0.999355	no	-0.0140715
ENSMUSG00000002804	Nudt14	chr12:114172943-114180329	OK	10.4069	8.76397	-0.247885	-0.765907	0.2838	0.999355	no	0.247885
ENSMUSG00000002808	Epdr1	chr13:19683577-19711699	NOTEST	0.0665674	0.285701	2.10162	0	1	1	no	-2.10162
ENSMUSG00000002812	Flii	chr11:60513224-60540765	OK	39.1989	40.0164	0.0297783	0.0809746	0.89335	0.999355	no	-0.0297783
ENSMUSG00000002814	Top3a	chr11:60553559-60590867	NOTEST	1.24292	1.1655	-0.092779	0	1	1	no	0.092779
ENSMUSG00000002820	Atg4d	chr9:21069742-21092415	OK	21.2218	23.6612	0.156973	0.573582	0.41805	0.999355	no	-0.156973
ENSMUSG00000002825	Qtrt1	chr9:21216280-21224721	NOTEST	0.636269	0.874582	0.458956	0	1	1	no	-0.458956
ENSMUSG00000002831	Plin4	chr17:56219056-56249225	NOTEST	0.01977	0.0170326	-0.215015	0	1	1	no	0.215015
ENSMUSG00000002833	Hdgfrp2	chr17:56219056-56249225	OK	4.83185	5.47942	0.181447	0.617338	0.38895	0.999355	no	-0.181447
ENSMUSG00000002835	Chaf1a	chr17:56179826-56214451	NOTEST	0.95081	0.85894	-0.1466	0	1	1	no	0.1466
ENSMUSG00000002844	Adprh	chr16:38445478-38453573	OK	11.2419	8.25008	-0.446406	-1.54696	0.0343	0.424064	no	0.446406
ENSMUSG00000002845	Tmem39a	chr16:38558810-38592275	OK	22.2208	19.7595	-0.169365	-0.484972	0.49335	0.999355	no	0.169365
ENSMUSG00000002846	4930455C21Rik	chr16:38498428-38522747	OK	14.2	14.8904	0.0684889	0.240269	0.7278	0.999355	no	-0.0684889
ENSMUSG00000002847	Pla1a	chr16:38396204-38433225	NOTEST	0.0903954	0.0392138	-1.20489	0	1	1	no	1.20489
ENSMUSG00000002870	Mcm2	chr6:88833468-88848774	NOTEST	1.7828	1.94787	0.127748	0	1	1	no	-0.127748
ENSMUSG00000002871	Tpra1	chr6:88852244-88862232	OK	23.1206	26.7289	0.209221	0.66358	0.3365	0.999355	no	-0.209221
ENSMUSG00000002881	Nab1	chr1:52514137-52557523	OK	9.29673	7.8437	-0.245189	-0.733268	0.2727	0.999355	no	0.245189
ENSMUSG00000002885	Cd97	chr8:86239075-86265225	OK	4.77576	3.41654	-0.483193	-0.79347	0.22235	0.999355	no	0.483193
ENSMUSG00000002897	Il17ra	chr6:120413214-120433745	OK	7.81314	7.88915	0.0139666	0.0510299	0.9438	0.999355	no	-0.0139666
ENSMUSG00000002900	Lamb1	chr12:31950098-32014509	NOTEST	0.173888	0.0942371	-0.883795	0	1	1	no	0.883795
ENSMUSG00000002908	Kcnn1	chr8:73365947-73380907	NOTEST	0	0.00266468	inf	0	1	1	no	#VALUE!
ENSMUSG00000002910	Arrdc2	chr8:73359053-73363619	OK	4.31072	5.30013	0.298101	0.976457	0.17755	0.937606	no	-0.298101
ENSMUSG00000002930	Ppp1r17	chr6:55967508-55982682	NOTEST	0	0.0139225	inf	0	1	1	no	#VALUE!
ENSMUSG00000002948	Map2k7	chr8:4238739-4251423	OK	4.35947	4.80766	0.14118	0.444721	0.5221	0.999355	no	-0.14118
ENSMUSG00000002949	Timm44	chr8:4259730-4275913	OK	15.5361	15.0832	-0.0426825	-0.133398	0.84915	0.999355	no	0.0426825
ENSMUSG00000002957	Ap2a2	chr7:148748078-148818910	OK	61.7902	58.2156	-0.0859723	-0.328301	0.63995	0.999355	no	0.0859723
ENSMUSG00000002963	Pnkp	chr7:52112508-52118295	OK	12.0036	10.5031	-0.192652	-0.60586	0.38495	0.999355	no	0.192652
ENSMUSG00000002968	Med25	chr7:52134760-52147779	OK	15.6468	14.9654	-0.0642387	-0.245215	0.73535	0.999355	no	0.0642387
ENSMUSG00000002980	Bcam	chr7:20341479-20360752	NOTEST	0.917257	0.871732	-0.0734415	0	1	1	no	0.0734415
ENSMUSG00000002981	Clptm1	chr7:20216929-20250379	OK	51.1749	44.8343	-0.190832	-0.731252	0.30335	0.999355	no	0.190832
ENSMUSG00000002983	Relb	chr7:20191565-20214787	OK	49.5887	40.5393	-0.290689	-1.02722	0.15885	0.909209	no	0.290689
ENSMUSG00000002984	Tomm40	chr7:20286661-20334922	OK	8.56397	10.7831	0.332427	0.347715	0.58495	0.999355	no	-0.332427
ENSMUSG00000002985	Apoe	chr7:20281457-20284515	OK	6.22054	5.14351	-0.274288	-0.715869	0.29505	0.999355	no	0.274288
ENSMUSG00000002996	Hbp1	chr12:32339733-32635400	OK	53.5149	51.0537	-0.067924	-0.190972	0.78035	0.999355	no	0.067924
ENSMUSG00000002997	Prkar2b	chr12:32643340-32746161	NOTEST	0.124751	0.157343	0.334865	0	1	1	no	-0.334865
ENSMUSG00000003031	Cdkn1b	chr6:134870418-134875531	OK	30.0499	23.5241	-0.353225	-1.28559	0.07115	0.634993	no	0.353225
ENSMUSG00000003032	Klf4	chr4:55540012-55545347	OK	132.604	135.174	0.0276886	0.105703	0.88065	0.999355	no	-0.0276886
ENSMUSG00000003033	Ap1m1	chr8:74763916-74781284	OK	14.4405	13.2528	-0.123826	-0.41551	0.55275	0.999355	no	0.123826
ENSMUSG00000003037	Rab8a	chr8:74685098-74707803	OK	97.6486	89.3041	-0.128873	-0.4374	0.5202	0.999355	no	0.128873
ENSMUSG00000003038	Hmgn2	chr4:133520652-133524565	NOTEST	1.41265	1.46203	0.0495713	0	1	1	no	-0.0495713
ENSMUSG00000003039	Fam32a	chr8:74743628-74747663	OK	28.46	31.1938	0.132321	0.49359	0.4837	0.999355	no	-0.132321
ENSMUSG00000003051	Elf3	chr1:137145137-137180661	OK	115.433	81.3802	-0.50431	-1.45827	0.04375	0.490107	no	0.50431
ENSMUSG00000003062	Stard3nl	chr13:19449545-19487621	OK	28.3532	26.5075	-0.0971143	-0.351041	0.61845	0.999355	no	0.0971143
ENSMUSG00000003068	Stk11	chr10:79578547-79608563	OK	18.3651	21.4245	0.222292	0.364897	0.5538	0.999355	no	-0.222292
ENSMUSG00000003070	Efna2	chr10:79642226-79652755	NOTEST	0.0221095	0.0414685	0.907346	0	1	1	no	-0.907346
ENSMUSG00000003072	Atp5d	chr10:79578547-79608563	OK	222.107	232.231	0.0643046	0.222458	0.7662	0.999355	no	-0.0643046
ENSMUSG00000003099	Ppp5c	chr7:17589988-17613273	OK	28.8647	33.9524	0.234203	0.808558	0.2376	0.999355	no	-0.234203
ENSMUSG00000003119	Cdk12	chr11:98064372-98139818	OK	12.765	12.0801	-0.0795623	-0.241235	0.7068	0.999355	no	0.0795623
ENSMUSG00000003123	Lipe	chr7:26164545-26183729	OK	55.0769	46.2846	-0.250914	-0.981493	0.1774	0.937606	no	0.250914
ENSMUSG00000003131	Pafah1b2	chr9:45773393-45792954	OK	12.0158	11.8997	-0.0140183	-0.0512398	0.94205	0.999355	no	0.0140183
ENSMUSG00000003134	Tbc1d8	chr1:39424695-39535592	OK	2.28568	3.728	0.705778	2.21435	0.00235	0.0615017	no	-0.705778
ENSMUSG00000003135	D1Bwg0212e	chr1:39591836-39603726	OK	7.13953	7.4882	0.0687895	0.231763	0.74345	0.999355	no	-0.0687895
ENSMUSG00000003153	Slc2a3	chr6:122677826-122751658	NOTEST	0.260071	0.29024	0.15834	0	1	1	no	-0.15834
ENSMUSG00000003154	Foxj2	chr6:122763643-122795384	OK	4.19549	4.99423	0.251424	0.921503	0.1989	0.969475	no	-0.251424
ENSMUSG00000003161	Sri	chr5:8037293-8069379	OK	118.142	107.975	-0.129816	-0.399294	0.57315	0.999355	no	0.129816
ENSMUSG00000003166	Dgcr2	chr16:17835368-17894238	OK	24.0721	24.7951	0.0426935	0.152658	0.827	0.999355	no	-0.0426935
ENSMUSG00000003178	Mical3	chr6:120881724-121031627	NOTEST	1.64744	1.35791	-0.278844	0	1	1	no	0.278844
ENSMUSG00000003184	Irf3	chr7:52242269-52258218	OK	24.6537	28.008	0.184032	0.572795	0.4185	0.999355	no	-0.184032
ENSMUSG00000003190	Bcl2l12	chr7:52242269-52258218	NOTEST	2.19422	2.58203	0.234793	0	1	1	no	-0.234793
ENSMUSG00000003198	Zfp959	chr17:56031606-56038007	OK	3.05578	3.00816	-0.0226592	-0.0591291	0.9389	0.999355	no	0.0226592
ENSMUSG00000003199	Mpnd	chr17:56145133-56176058	OK	38.9817	48.1221	0.303902	0.857415	0.22695	0.999355	no	-0.303902
ENSMUSG00000003200	Sh3gl1	chr17:56145133-56176058	OK	21.9706	18.9629	-0.212392	-0.479635	0.4975	0.999355	no	0.212392
ENSMUSG00000003206	Ebi3	chr17:56092045-56107372	NOTEST	0.0659838	0.103391	0.647921	0	1	1	no	-0.647921
ENSMUSG00000003208	Ccdc94	chr17:56092045-56107372	NOTEST	1.63847	1.92784	0.234635	0	1	1	no	-0.234635
ENSMUSG00000003226	Ranbp2	chr10:57909599-57956903	OK	16.4958	15.4	-0.0991625	-0.381033	0.59435	0.999355	no	0.0991625
ENSMUSG00000003227	Edar	chr10:58063536-58138402	NOTEST	0.00393179	0.00318621	-0.303342	0	1	1	no	0.303342
ENSMUSG00000003228	Grk5	chr19:60965651-61216743	NOTEST	1.42559	1.47677	0.0508882	0	1	1	no	-0.0508882
ENSMUSG00000003233	Dvl3	chr16:20511205-20532593	OK	8.90602	8.80774	-0.0160081	-0.0561309	0.9392	0.999355	no	0.0160081
ENSMUSG00000003234	Abcf3	chr16:20548649-20561452	OK	12.8717	15.3774	0.256604	0.692513	0.31245	0.999355	no	-0.256604
ENSMUSG00000003235	Eif2b5	chr16:20498889-20510028	OK	10.3631	10.3507	-0.0017331	-0.00489564	0.9937	0.999355	no	0.0017331
ENSMUSG00000003269	Cyth2	chr7:53062006-53069951	OK	19.275	20.6085	0.0965096	0.349952	0.62795	0.999355	no	-0.0965096
ENSMUSG00000003271	Sult2b1	chr7:52985352-53014982	OK	127.751	120.354	-0.0860499	-0.310223	0.664	0.999355	no	0.0860499
ENSMUSG00000003273	Car11	chr7:52955212-52960052	NOTEST	0	0	0	0	1	1	no	0
ENSMUSG00000003279	Dlgap1	chr17:70318412-71170753	NOTEST	0.12023	0.111629	-0.107077	0	1	1	no	0.107077
ENSMUSG00000003282	Plag1	chr4:3828142-3865570	NOTEST	1.80725	1.54652	-0.224765	0	1	1	no	0.224765
ENSMUSG00000003299	Mrpl4	chr9:20807180-20813279	OK	11.2641	13.6333	0.275398	0.986708	0.18295	0.944386	no	-0.275398
ENSMUSG00000003308	Keap1	chr9:21029814-21043776	OK	13.3402	12.4087	-0.104422	-0.383025	0.58895	0.999355	no	0.104422
ENSMUSG00000003309	Ap1m2	chr9:21099900-21116777	OK	34.3337	34.9137	0.0241668	0.0911644	0.8979	0.999355	no	-0.0241668
ENSMUSG00000003316	Glg1	chr8:113678320-113783116	OK	27.352	24.4149	-0.163884	-0.613616	0.37435	0.999355	no	0.163884
ENSMUSG00000003341	Atp8b3	chr10:79982329-80001869	NOTEST	0.00362399	0.00603385	0.735502	0	1	1	no	-0.735502
ENSMUSG00000003344	Btbd2	chr10:80105361-80119816	OK	9.93476	9.74659	-0.0275877	-0.0875039	0.9049	0.999355	no	0.0275877
ENSMUSG00000003345	Csnk1g2	chr10:80085524-80103516	OK	28.2269	27.4771	-0.0388383	-0.143477	0.83785	0.999355	no	0.0388383
ENSMUSG00000003346	Fam108a	chr10:80046393-80053086	OK	41.8944	48.1889	0.201942	0.790907	0.27995	0.999355	no	-0.201942
ENSMUSG00000003348	Mob3a	chr10:80144582-80164565	OK	5.69717	5.98263	0.0705344	0.232713	0.7386	0.999355	no	-0.0705344
ENSMUSG00000003352	Cacnb3	chr15:98462650-98474961	NOTEST	2.63138	1.65522	-0.668795	0	1	1	no	0.668795
ENSMUSG00000003354	Ccdc65	chr15:98538624-98553757	NOTEST	0	0	0	0	1	1	no	0
ENSMUSG00000003355	Fkbp11	chr15:98554803-98558629	NOTEST	0.520645	0.607905	0.223546	0	1	1	no	-0.223546
ENSMUSG00000003360	Ddx23	chr15:98475564-98493320	OK	14.1293	13.9836	-0.0149538	-0.0515965	0.9359	0.999355	no	0.0149538
ENSMUSG00000003363	Pld3	chr7:28317018-28338237	OK	8.90926	7.11099	-0.325256	-0.801709	0.24925	0.999355	no	0.325256
ENSMUSG00000003378	Grik5	chr7:25794871-25857388	NOTEST	0.293245	0.430113	0.55261	0	1	1	no	-0.55261
ENSMUSG00000003379	Cd79a	chr7:25682399-25687216	NOTEST	1.29103	1.21301	-0.0899284	0	1	1	no	0.0899284
ENSMUSG00000003380	Rabac1	chr7:25754768-25757747	OK	15.3942	17.7889	0.20859	0.739069	0.3244	0.999355	no	-0.20859
ENSMUSG00000003382	Etv3	chr3:87329328-87344078	OK	32.2059	23.4767	-0.456094	-1.59814	0.0241	0.335937	no	0.456094
ENSMUSG00000003402	Prkcsh	chr9:21807478-21818663	OK	82.7312	69.5461	-0.250461	-0.979209	0.16605	0.923326	no	0.250461
ENSMUSG00000003410	Elavl3	chr9:21819448-21856467	NOTEST	0.0228456	0.0222084	-0.0408074	0	1	1	no	0.0408074
ENSMUSG00000003411	Rab3b	chr4:108551667-108644682	NOTEST	0.164307	0.169398	0.0440278	0	1	1	no	-0.0440278
ENSMUSG00000003418	St8sia6	chr2:13572646-13715435	NOTEST	0.0742432	0.0338943	-1.13122	0	1	1	no	1.13122
ENSMUSG00000003421	Nosip	chr7:52308982-52333873	OK	11.9738	10.9641	-0.127089	-0.205484	0.73595	0.999355	no	0.127089
ENSMUSG00000003423	Pih1d1	chr7:52396053-52415439	OK	11.1728	13.1358	0.233507	0.258442	0.69145	0.999355	no	-0.233507
ENSMUSG00000003429	Rps11	chr7:52377756-52379766	OK	64.9079	74.0777	0.190645	0.698821	0.31415	0.999355	no	-0.190645
ENSMUSG00000003435	Supt5h	chr7:29099916-29123738	OK	18.5241	18.1029	-0.0331814	-0.125243	0.862	0.999355	no	0.0331814
ENSMUSG00000003436	Dll3	chr7:29076672-29087257	NOTEST	0	0.0122791	inf	0	1	1	no	#VALUE!
ENSMUSG00000003437	Paf1	chr7:29177969-29184407	OK	24.4229	21.8834	-0.158396	-0.44918	0.53125	0.999355	no	0.158396
ENSMUSG00000003438	Timm50	chr7:29090534-29097091	OK	7.04409	7.11301	0.0140459	0.0386154	0.95555	0.999355	no	-0.0140459
ENSMUSG00000003444	Med29	chr7:29171164-29177727	NOTEST	1.42883	1.53666	0.104966	0	1	1	no	-0.104966
ENSMUSG00000003452	Bicd1	chr6:149357505-149511851	NOTEST	0.255993	0.389179	0.604329	0	1	1	no	-0.604329
ENSMUSG00000003458	Ncstn	chr1:173996143-174052461	OK	70.0028	64.8789	-0.109662	-0.179589	0.77715	0.999355	no	0.109662
ENSMUSG00000003464	Pex19	chr1:174056885-174066624	OK	42.372	39.2672	-0.109789	-0.386248	0.5675	0.999355	no	0.109789
ENSMUSG00000003469	Phyhip	chr14:70857282-70868639	NOTEST	0.0142813	0.0456861	1.67763	0	1	1	no	-1.67763
ENSMUSG00000003476	Crhr2	chr6:55040042-55083010	NOTEST	0	0.00907372	inf	0	1	1	no	#VALUE!
ENSMUSG00000003477	Inmt	chr6:55120619-55125037	NOTEST	0	0	0	0	1	1	no	0
ENSMUSG00000003484	Cyp4f18	chr8:74474936-74533525	NOTEST	0.411778	0.231199	-0.832733	0	1	1	no	0.832733
ENSMUSG00000003500	Impdh1	chr6:29150433-29166364	NOTEST	0.529	0.5827	0.139487	0	1	1	no	-0.139487
ENSMUSG00000003505	Psg18	chr7:18931156-18940356	NOTEST	0.127157	0.0312825	-2.02318	0	1	1	no	2.02318
ENSMUSG00000003518	Dusp3	chr11:101832456-101853578	NOTEST	0.942976	0.712013	-0.405317	0	1	1	no	0.405317
ENSMUSG00000003526	Prodh	chr16:18052952-18090296	OK	17.2776	11.2202	-0.622797	-1.4027	0.0312	0.399726	no	0.622797
ENSMUSG00000003527	Dgcr14	chr16:17900803-17911441	NOTEST	1.8977	1.95277	0.0412683	0	1	1	no	-0.0412683
ENSMUSG00000003528	Slc25a1	chr16:17925303-17928312	OK	51.5648	39.792	-0.37391	-1.28359	0.0658	0.614267	no	0.37391
ENSMUSG00000003531	Dgcr6	chr16:18052952-18090296	OK	32.7302	31.2418	-0.0671452	-0.176204	0.80635	0.999355	no	0.0671452
ENSMUSG00000003534	Ddr1	chr17:35818511-35845189	OK	34.8867	28.9021	-0.271503	-1.05432	0.145	0.87457	no	0.271503
ENSMUSG00000003541	Ier3	chr17:35958628-35959868	OK	3.20406	2.90981	-0.138974	-0.359451	0.6117	0.999355	no	0.138974
ENSMUSG00000003545	Fosb	chr7:19888069-19895394	NOTEST	2.67078	2.16869	-0.300438	0	1	1	no	0.300438
ENSMUSG00000003546	Klc4	chr17:46579396-46968362	OK	72.4702	68.9687	-0.0714462	-0.149741	0.82585	0.999355	no	0.0714462
ENSMUSG00000003549	Ercc1	chr7:19930126-19941873	OK	2.8649	3.82408	0.416629	0.750935	0.29575	0.999355	no	-0.416629
ENSMUSG00000003555	Cyp17a1	chr19:46741654-46747464	NOTEST	0.41681	0.688152	0.723337	0	1	1	no	-0.723337
ENSMUSG00000003559	As3mt	chr19:46781932-46815585	OK	14.4456	12.0591	-0.260506	-0.920644	0.19615	0.965859	no	0.260506
ENSMUSG00000003573	Homer3	chr8:72806725-72826388	NOTEST	0.341179	0.691272	1.01873	0	1	1	no	-1.01873
ENSMUSG00000003575	Crtc1	chr8:72906253-72963478	NOTEST	1.29796	1.2111	-0.0999281	0	1	1	no	0.0999281
ENSMUSG00000003581	Rnf215	chr11:4035204-4060296	OK	7.06969	7.05943	-0.00209463	-0.00627093	0.9932	0.999355	no	0.00209463
ENSMUSG00000003585	Sec14l2	chr11:3997041-4023418	OK	106.471	129.868	0.286586	1.04328	0.12835	0.821619	no	-0.286586
ENSMUSG00000003604	Aven	chr2:112333120-113057253	OK	2.21747	3.14045	0.502058	1.16801	0.10145	0.752155	no	-0.502058
ENSMUSG00000003617	Cp	chr3:19857053-19935315	NOTEST	0.175605	0.268836	0.614393	0	1	1	no	-0.614393
ENSMUSG00000003623	Crot	chr5:8966032-8997324	OK	128.929	125.026	-0.0443532	-0.164773	0.81175	0.999355	no	0.0443532
ENSMUSG00000003644	Rps6ka1	chr4:133403204-133443712	OK	77.9338	71.2118	-0.130134	-0.432	0.4914	0.999355	no	0.130134
ENSMUSG00000003657	Calb2	chr8:112661401-112692110	NOTEST	0	0	0	0	1	1	no	0
ENSMUSG00000003660	Snrnp200	chr2:127034121-127066187	OK	16.8989	14.2091	-0.250114	-0.726352	0.20785	0.978356	no	0.250114
ENSMUSG00000003662	Ciao1	chr2:127066673-127073552	OK	13.7806	14.1394	0.037074	0.106182	0.87695	0.999355	no	-0.037074
ENSMUSG00000003665	Has1	chr17:17980291-17992152	NOTEST	0	0	0	0	1	1	no	0
ENSMUSG00000003680	Taf6l	chr19:8847011-8860907	NOTEST	0.867151	0.654236	-0.406472	0	1	1	no	0.406472
ENSMUSG00000003721	Insig2	chr1:123200929-123229166	OK	33.8614	29.8302	-0.182866	-0.584162	0.3663	0.999355	no	0.182866
ENSMUSG00000003731	Kpna6	chr4:129321223-129350011	OK	10.9171	10.0656	-0.117158	-0.338981	0.58955	0.999355	no	0.117158
ENSMUSG00000003746	Man1a	chr10:53624593-53795602	OK	125.241	116.42	-0.105368	-0.388987	0.5792	0.999355	no	0.105368
ENSMUSG00000003752	Itpkc	chr7:27992190-28013647	OK	12.8628	15.5751	0.276037	0.744065	0.25575	0.999355	no	-0.276037
ENSMUSG00000003762	Adck4	chr7:28018041-28067163	OK	6.82305	5.62713	-0.278016	-0.793588	0.25855	0.999355	no	0.278016
ENSMUSG00000003778	Brd8	chr18:34758268-34784255	OK	11.7917	10.3486	-0.188335	-0.673314	0.33005	0.999355	no	0.188335
ENSMUSG00000003779	Kif20a	chr18:34784277-34811389	NOTEST	0.653506	0.82529	0.336701	0	1	1	no	-0.336701
ENSMUSG00000003808	Farsa	chr8:87380887-87393156	OK	4.98981	6.59722	0.402875	1.12532	0.10585	0.768647	no	-0.402875
ENSMUSG00000003809	Gcdh	chr8:87396009-87417820	OK	5.6631	7.67234	0.438075	1.23428	0.07975	0.672321	no	-0.438075
ENSMUSG00000003810	Mast2	chr4:115979366-116136788	OK	41.053	40.9915	-0.00216321	-0.00630543	0.99015	0.999355	no	0.00216321
ENSMUSG00000003812	Dnase2a	chr8:87432458-87461258	OK	2.27712	2.8134	0.305105	0.618046	0.362	0.999355	no	-0.305105
ENSMUSG00000003813	Rad23a	chr8:87339303-87364564	OK	15.4624	15.6412	0.0165892	0.0382792	0.9532	0.999355	no	-0.0165892
ENSMUSG00000003814	Calr	chr8:87365748-87370833	OK	313.052	323.037	0.0452971	0.162455	0.8212	0.999355	no	-0.0452971
ENSMUSG00000003824	Syce2	chr8:87396009-87417820	NOTEST	0.572521	0.35439	-0.691989	0	1	1	no	0.691989
ENSMUSG00000003847	Nfat5	chr8:109817369-109903417	OK	15.2644	18.7527	0.296931	0.955809	0.12715	0.816533	no	-0.296931
ENSMUSG00000003848	Nob1	chr8:109936385-109948951	OK	2.23045	2.87975	0.368611	0.885107	0.19225	0.958994	no	-0.368611
ENSMUSG00000003849	Nqo1	chr8:109912124-109927106	OK	8.84547	9.45066	0.0954765	0.317404	0.6492	0.999355	no	-0.0954765
ENSMUSG00000003863	Ppfia3	chr7:52594495-52625953	OK	13.8113	14.2567	0.0457977	0.164451	0.82305	0.999355	no	-0.0457977
ENSMUSG00000003865	Gys1	chr7:52673722-52711989	NOTEST	2.27893	2.23618	-0.0273174	0	1	1	no	0.0273174
ENSMUSG00000003868	Ruvbl2	chr7:52673722-52711989	OK	3.47348	3.89918	0.166788	0.391579	0.5833	0.999355	no	-0.166788
ENSMUSG00000003872	Lin7b	chr7:52594495-52625953	NOTEST	0.0727152	0.0618206	-0.234169	0	1	1	no	0.234169
ENSMUSG00000003873	Bax	chr7:52717064-52722268	OK	11.147	13.246	0.248904	0.845187	0.2391	0.999355	no	-0.248904
ENSMUSG00000003882	Il7r	chr15:9435915-9459631	NOTEST	0.187209	0.1712	-0.12897	0	1	1	no	0.12897
ENSMUSG00000003923	Tfam	chr10:70688211-70701028	OK	14.8207	16.7982	0.180694	0.437795	0.5299	0.999355	no	-0.180694
ENSMUSG00000003929	Zfp81	chr17:33466286-33495823	NOTEST	1.48814	1.59251	0.097788	0	1	1	no	-0.097788
ENSMUSG00000003934	Efnb3	chr11:69367593-69373707	NOTEST	0.266365	0.404735	0.603574	0	1	1	no	-0.603574
ENSMUSG00000003948	Mmd	chr11:90048997-90139903	OK	12.8395	18.6488	0.538495	1.94414	0.0068	0.141004	no	-0.538495
ENSMUSG00000003949	Hlf	chr11:90197848-90252231	NOTEST	0.547551	0.993547	0.859594	0	1	1	no	-0.859594
ENSMUSG00000003955	Fam162a	chr16:36043929-36071601	OK	18.4732	16.2187	-0.187771	-0.594854	0.3923	0.999355	no	0.187771
ENSMUSG00000003970	Rpl8	chr15:76734500-76736748	OK	85.2605	109.339	0.358859	1.35234	0.05295	0.555226	no	-0.358859
ENSMUSG00000003974	Grm3	chr5:9485235-9725352	NOTEST	0	0	0	0	1	1	no	0
ENSMUSG00000003992	Ssbp2	chr13:91599887-91925753	NOTEST	0.179031	0.14041	-0.350565	0	1	1	no	0.350565
ENSMUSG00000004018	Fancl	chr11:26286134-26493999	NOTEST	1.53799	1.50764	-0.0287595	0	1	1	no	0.0287595
ENSMUSG00000004031	Fam5b	chr1:160175401-160286391	NOTEST	0.0031585	0.00291334	-0.116565	0	1	1	no	0.116565
ENSMUSG00000004032	Gstm5	chr3:107680147-107701604	OK	6.53068	5.56141	-0.231783	-0.0768029	0.8755	0.999355	no	0.231783
ENSMUSG00000004035	Gstm7	chr3:107729251-107734735	OK	8.80173	9.25094	0.0718126	0.194371	0.77585	0.999355	no	-0.0718126
ENSMUSG00000004038	Gstm3	chr3:107741764-107772201	OK	60.3898	74.3393	0.29982	0.994886	0.16025	0.909238	no	-0.29982
ENSMUSG00000004040	Stat3	chr11:100720664-100800854	OK	54.5435	46.412	-0.23291	-0.666632	0.2203	0.999334	no	0.23291
ENSMUSG00000004043	Stat5a	chr11:100720664-100800854	NOTEST	0.957219	0.798539	-0.261485	0	1	1	no	0.261485
ENSMUSG00000004044	Ptrf	chr11:100818046-100832201	NOTEST	0.127642	0.149658	0.229561	0	1	1	no	-0.229561
ENSMUSG00000004054	Map3k11	chr19:5689130-5702862	OK	20.0102	19.0591	-0.0702566	-0.27735	0.6999	0.999355	no	0.0702566
ENSMUSG00000004056	Akt2	chr7:28376570-28425845	OK	7.45853	6.43876	-0.212108	-0.524936	0.4407	0.999355	no	0.212108
ENSMUSG00000004069	Dnaja3	chr16:4626132-4707695	OK	11.0286	10.3578	-0.0905256	-0.187066	0.78675	0.999355	no	0.0905256
ENSMUSG00000004070	Hmox2	chr16:4726360-4790292	OK	19.3814	18.0768	-0.100531	-0.173534	0.80065	0.999355	no	0.100531
ENSMUSG00000004071	5730403B10Rik	chr16:4726360-4790292	OK	26.5849	28.1255	0.0812719	0.259432	0.70795	0.999355	no	-0.0812719
ENSMUSG00000004085	B230120H23Rik	chr2:72123693-72280667	NOTEST	1.14893	1.08403	-0.0838771	0	1	1	no	0.0838771
ENSMUSG00000004096	Cwc15	chr9:14305060-14315021	OK	29.7806	28.1426	-0.0816134	-0.296144	0.6742	0.999355	no	0.0816134
ENSMUSG00000004098	Col5a3	chr9:20574493-20619511	NOTEST	0.00338675	0.00134104	-1.33655	0	1	1	no	1.33655
ENSMUSG00000004099	Dnmt1	chr9:20711649-20757317	NOTEST	1.9395	1.92302	-0.0123117	0	1	1	no	0.0123117
ENSMUSG00000004100	Ppan	chr9:20692618-20696622	OK	2.73267	4.09952	0.585146	1.03855	0.13885	0.8558	no	-0.585146
ENSMUSG00000004105	Angptl2	chr2:32988940-33227006	NOTEST	0.101125	0.133366	0.399245	0	1	1	no	-0.399245
ENSMUSG00000004110	Cacna1e	chr1:156239648-156573049	NOTEST	0.0150618	0.0275698	0.87219	0	1	1	no	-0.87219
ENSMUSG00000004113	Cacna1b	chr2:24459406-24618672	NOTEST	0.418923	0.169791	-1.30293	0	1	1	no	1.30293
ENSMUSG00000004127	Rg9mtd2	chr3:137806411-137822785	NOTEST	0.419193	0.534416	0.350348	0	1	1	no	-0.350348
ENSMUSG00000004151	Etv1	chr12:39505966-39594802	NOTEST	0.175729	0.129639	-0.438846	0	1	1	no	0.438846
ENSMUSG00000004187	Kifc2	chr15:76490995-76498625	OK	3.3826	4.82367	0.511998	1.77145	0.013	0.220736	no	-0.511998
ENSMUSG00000004207	Psap	chr10:59740374-59765345	OK	87.1215	73.5318	-0.24466	-0.931744	0.1859	0.946575	no	0.24466
ENSMUSG00000004221	Ikbkg	chrX:71638628-71699193	OK	9.18332	9.76486	0.0885839	0.200024	0.76065	0.999355	no	-0.0885839
ENSMUSG00000004231	Pax2	chr19:44830538-44912758	NOTEST	0	0.00276251	inf	0	1	1	no	#VALUE!
ENSMUSG00000004233	Wars2	chr3:98944990-99043109	NOTEST	1.52687	1.5736	0.0434955	0	1	1	no	-0.0434955
ENSMUSG00000004263	Atn1	chr6:124689200-124706542	OK	12.9299	13.0454	0.0128321	0.0439832	0.95485	0.999355	no	-0.0128321
ENSMUSG00000004264	Phb2	chr6:124662339-124668849	OK	75.9941	88.0855	0.213018	0.701459	0.31755	0.999355	no	-0.213018
ENSMUSG00000004266	Ptpn6	chr6:124670724-124688732	OK	13.246	15.2865	0.206699	0.483328	0.39575	0.999355	no	-0.206699
ENSMUSG00000004267	Eno2	chr6:124710070-124719691	NOTEST	0.017394	0.0301985	0.795889	0	1	1	no	-0.795889
ENSMUSG00000004268	Emg1	chr6:124613044-124662196	OK	20.0107	24.1981	0.274122	0.229693	0.76355	0.999355	no	-0.274122
ENSMUSG00000004270	Lpcat3	chr6:124613044-124662196	OK	166.949	178.476	0.0963213	0.316349	0.6332	0.999355	no	-0.0963213
ENSMUSG00000004285	Atp6v1f	chr6:29417717-29420512	OK	15.1129	15.6605	0.0513451	0.163117	0.8201	0.999355	no	-0.0513451
ENSMUSG00000004296	Il12b	chr11:44213564-44227535	NOTEST	0	0	0	0	1	1	no	0
ENSMUSG00000004317	Clcn5	chrX:6730935-6896484	OK	18.433	18.2332	-0.0157232	-0.0560371	0.9311	0.999355	no	0.0157232
ENSMUSG00000004319	Clcn3	chr8:63389185-63462097	OK	53.0607	57.5628	0.117493	0.428816	0.54165	0.999355	no	-0.117493
ENSMUSG00000004328	Hif3a	chr7:17616855-17647776	NOTEST	0.0324607	0.0579453	0.835999	0	1	1	no	-0.835999
ENSMUSG00000004341	Gpx6	chr13:21404085-21411493	NOTEST	0.0132143	0	#NAME?	0	1	1	no	#NAME?
ENSMUSG00000004344	Gpx5	chr13:21378297-21384600	NOTEST	0.0185716	0.0166322	-0.159116	0	1	1	no	0.159116
ENSMUSG00000004347	Pde1c	chr6:56019814-56319628	NOTEST	0.048525	0.0388991	-0.318992	0	1	1	no	0.318992
ENSMUSG00000004356	Utp20	chr10:88209351-88289559	NOTEST	0.40991	0.537909	0.392054	0	1	1	no	-0.392054
ENSMUSG00000004359	Spic	chr10:88137516-88147760	NOTEST	0	0	0	0	1	1	no	0
ENSMUSG00000004360	9330159F19Rik	chr10:28931448-28950585	NOTEST	0.0104993	0.00559865	-0.907136	0	1	1	no	0.907136
ENSMUSG00000004364	Cul3	chr1:80261497-80337055	OK	50.2361	44.6573	-0.169826	-0.555642	0.42925	0.999355	no	0.169826
ENSMUSG00000004366	Sst	chr16:23889666-23890930	OK	50.405	63.9609	0.343625	1.31865	0.0812	0.679129	no	-0.343625
ENSMUSG00000004371	Il11	chr7:4724656-4734459	NOTEST	0.0807029	0.119554	0.566965	0	1	1	no	-0.566965
ENSMUSG00000004383	Large	chr8:75338497-75877439	NOTEST	2.4029	2.40644	0.00212711	0	1	1	no	-0.00212711
ENSMUSG00000004393	Ddx56	chr11:6158921-6167775	OK	4.26146	4.38967	0.0427622	0.115658	0.86525	0.999355	no	-0.0427622
ENSMUSG00000004394	Tmed4	chr11:6170371-6174873	OK	128.883	96.5275	-0.417051	-1.58268	0.0243	0.338212	no	0.417051
ENSMUSG00000004415	Emid2	chr5:137217628-137359079	NOTEST	0	0	0	0	1	1	no	0
ENSMUSG00000004446	Bid	chr6:120786247-120866871	OK	9.60382	6.68405	-0.522886	-0.980206	0.126	0.813949	no	0.522886
ENSMUSG00000004451	Ralb	chr1:121366881-121401371	OK	20.3832	21.268	0.0613046	0.228176	0.74395	0.999355	no	-0.0613046
ENSMUSG00000004455	Ppp1cc	chr5:122608286-122625282	OK	6.05811	6.2233	0.0388116	0.089757	0.89655	0.999355	no	-0.0388116
ENSMUSG00000004460	Dnajb11	chr16:22857917-22879707	OK	76.9599	87.3078	0.182002	0.520413	0.4596	0.999355	no	-0.182002
ENSMUSG00000004462	Tbccd1	chr16:22813287-22857642	OK	4.21958	5.45265	0.369858	1.2087	0.08835	0.70757	no	-0.369858
ENSMUSG00000004473	Clec11a	chr7:51559139-51562329	NOTEST	0.0723341	0.0757898	0.0673291	0	1	1	no	-0.0673291
ENSMUSG00000004500	Zfp324	chr7:13551186-13559585	NOTEST	0.817906	0.782819	-0.0632563	0	1	1	no	0.0632563
ENSMUSG00000004508	Gab2	chr7:104230260-104457450	OK	4.45035	3.3159	-0.424519	-1.48994	0.0324	0.412225	no	0.424519
ENSMUSG00000004530	Coro1c	chr5:114292444-114358767	OK	57.3761	54.6459	-0.0703359	-0.233098	0.70455	0.999355	no	0.0703359
ENSMUSG00000004535	Tax1bp1	chr6:52663722-52716774	OK	216.288	162.887	-0.409085	-1.49684	0.0273	0.366634	no	0.409085
ENSMUSG00000004540	Psg17	chr7:19399285-19406956	NOTEST	0	0	0	0	1	1	no	0
ENSMUSG00000004542	Psg19	chr7:19374473-19383859	NOTEST	0	0	0	0	1	1	no	0
ENSMUSG00000004552	Ctse	chr1:133534882-133572080	NOTEST	0.120021	0.0827474	-0.536496	0	1	1	no	0.536496
ENSMUSG00000004558	Ndrg2	chr14:52524945-52533163	NOTEST	1.96257	2.12532	0.114933	0	1	1	no	-0.114933
ENSMUSG00000004561	Mettl17	chr14:52504516-52516420	OK	5.4152	6.23315	0.202946	0.431535	0.5243	0.999355	no	-0.202946
ENSMUSG00000004562	Arhgef40	chr14:52604507-52640408	NOTEST	0.285326	0.262712	-0.119131	0	1	1	no	0.119131
ENSMUSG00000004565	Pnpla6	chr8:3515383-3544266	OK	20.321	20.1707	-0.0107149	-0.0413312	0.9554	0.999355	no	0.0107149
ENSMUSG00000004567	Mcoln1	chr8:3500456-3515232	OK	18.8648	21.5825	0.194168	0.562936	0.4122	0.999355	no	-0.194168
ENSMUSG00000004568	Arhgef18	chr8:3393005-3456601	OK	11.1672	10.5454	-0.0826543	-0.292608	0.666	0.999355	no	0.0826543
ENSMUSG00000004591	Pkn2	chr3:142453865-142544968	OK	36.053	37.8946	0.0718716	0.238196	0.70305	0.999355	no	-0.0718716
ENSMUSG00000004609	Cd33	chr7:50782825-50788541	NOTEST	0.0642184	0.0618842	-0.0534147	0	1	1	no	0.0534147
ENSMUSG00000004610	Etfb	chr7:50699477-50713170	OK	52.5248	58.0079	0.143251	0.522835	0.45595	0.999355	no	-0.143251
ENSMUSG00000004612	Nkg7	chr7:50692442-50693616	OK	8.3664	7.81828	-0.0977567	-0.294263	0.6802	0.999355	no	0.0977567
ENSMUSG00000004613	Lim2	chr7:50683039-50691363	NOTEST	0	0	0	0	1	1	no	0
ENSMUSG00000004626	Stxbp2	chr8:3630954-3643644	OK	83.3254	90.5199	0.119479	0.316779	0.62195	0.999355	no	-0.119479
ENSMUSG00000004630	Pcp2	chr8:3621574-3625545	NOTEST	0.180276	0.179392	-0.0070923	0	1	1	no	0.0070923
ENSMUSG00000004631	Sgce	chr6:4624349-4697204	NOTEST	0	0.0340592	inf	0	1	1	no	#VALUE!
ENSMUSG00000004633	Chn2	chr6:53989547-54453762	OK	25.5668	25.2797	-0.0162929	-0.0237868	0.9743	0.999355	no	0.0162929
ENSMUSG00000004637	Wwox	chr8:116963554-117876608	NOTEST	2.1278	1.77774	-0.259324	0	1	1	no	0.259324
ENSMUSG00000004642	Slbp	chr5:33977600-33995223	OK	24.3658	24.3122	-0.00317808	-0.0102184	0.98745	0.999355	no	0.00317808
ENSMUSG00000004651	Tyr	chr7:94574909-94641943	NOTEST	0	0	0	0	1	1	no	0
ENSMUSG00000004654	Ghrhr	chr6:55326288-55338524	NOTEST	0	0.007675	inf	0	1	1	no	#VALUE!
ENSMUSG00000004655	Aqp1	chr6:55286425-55298549	OK	143.642	188.68	0.393461	1.46748	0.037	0.444872	no	-0.393461
ENSMUSG00000004661	Arid3b	chr9:57625671-57684600	OK	5.46854	5.43598	-0.00861672	-0.0110903	0.98725	0.999355	no	0.00861672
ENSMUSG00000004665	Cnn2	chr10:79451328-79458807	NOTEST	2.55629	1.82428	-0.486723	0	1	1	no	0.486723
ENSMUSG00000004667	Polr2e	chr10:79498693-79502540	OK	10.4015	10.3967	-0.000672907	-0.00212901	0.998	0.999355	no	0.000672907
ENSMUSG00000004668	Abca13	chr11:9091944-9584262	NOTEST	0.00783932	0.00432853	-0.85685	0	1	1	no	0.85685
ENSMUSG00000004677	Myo9b	chr8:73772459-73884611	OK	6.07534	5.48008	-0.148769	-0.531473	0.45255	0.999355	no	0.148769
ENSMUSG00000004698	Hdac9	chr12:34732450-35213754	NOTEST	0.0935113	0.0445968	-1.0682	0	1	1	no	1.0682
ENSMUSG00000004707	Ly9	chr1:173518754-173537541	NOTEST	0.580498	0.517235	-0.166472	0	1	1	no	0.166472
ENSMUSG00000004709	Cd244	chr1:173489323-173515449	OK	2.99972	3.32681	0.149314	0.367057	0.5962	0.999355	no	-0.149314
ENSMUSG00000004730	Emr1	chr17:57498108-57622952	NOTEST	0.0814387	0.0607733	-0.422276	0	1	1	no	0.422276
ENSMUSG00000004748	Mtfp1	chr11:3991482-3995448	OK	9.87075	9.34259	-0.0793379	-0.26083	0.7096	0.999355	no	0.0793379
ENSMUSG00000004768	Rab23	chr1:33776726-33799409	NOTEST	0.684648	0.948584	0.470414	0	1	1	no	-0.470414
ENSMUSG00000004771	Rab11a	chr9:64563105-64585565	OK	162.458	152.929	-0.0872105	-0.284258	0.69035	0.999355	no	0.0872105
ENSMUSG00000004788	Eif2b2	chr12:86560430-86567578	OK	10.1115	8.9131	-0.181994	-0.49838	0.48165	0.999355	no	0.181994
ENSMUSG00000004789	Dlst	chr12:86451782-86475041	OK	141.396	127.284	-0.151691	-0.568241	0.41505	0.999355	no	0.151691
ENSMUSG00000004791	Pgf	chr12:86507588-86518246	NOTEST	0.00739309	0	#NAME?	0	1	1	no	#NAME?
ENSMUSG00000004798	Ulk2	chr11:61589150-61668575	OK	7.81401	8.21241	0.0717412	0.247766	0.71825	0.999355	no	-0.0717412
ENSMUSG00000004815	Dgkq	chr5:109058788-109113576	OK	39.7108	39.1925	-0.0189536	-0.0534101	0.93185	0.999355	no	0.0189536
ENSMUSG00000004821	Tmed11	chr5:109206253-109224382	NOTEST	0	0	0	0	1	1	no	0
ENSMUSG00000004837	Grap	chr11:61466766-61534328	NOTEST	0.419016	0.413583	-0.0188303	0	1	1	no	0.0188303
ENSMUSG00000004842	Pou1f1	chr16:65520846-65535250	NOTEST	0.308225	0.475098	0.624239	0	1	1	no	-0.624239
ENSMUSG00000004843	Chmp2b	chr16:65539377-65562942	OK	137.838	144.787	0.0709536	0.268817	0.7013	0.999355	no	-0.0709536
ENSMUSG00000004846	Plod3	chr5:137458033-137472518	OK	4.69006	3.85616	-0.282443	-0.539719	0.46295	0.999355	no	0.282443
ENSMUSG00000004849	Ap1s1	chr5:137510862-137522005	OK	29.9226	26.2182	-0.190666	-0.641368	0.3704	0.999355	no	0.190666
ENSMUSG00000004864	Mapk13	chr17:28906251-28915643	OK	133.499	131.555	-0.0211658	-0.0818	0.91075	0.999355	no	0.0211658
ENSMUSG00000004865	Srpk1	chr17:28724592-28759466	OK	32.8918	30.6218	-0.103169	-0.265139	0.67535	0.999355	no	0.103169
ENSMUSG00000004872	Pax3	chr1:78097841-78193709	NOTEST	0	0	0	0	1	1	no	0
ENSMUSG00000004880	Lbr	chr1:183745446-183772532	OK	7.36265	8.30761	0.174207	0.604205	0.3848	0.999355	no	-0.174207
ENSMUSG00000004885	Crabp2	chr3:87752587-87757298	NOTEST	0.025468	0.0119994	-1.08573	0	1	1	no	1.08573
ENSMUSG00000004891	Nes	chr3:87774999-87784373	NOTEST	0.00584164	0.00416012	-0.489749	0	1	1	no	0.489749
ENSMUSG00000004892	Bcan	chr3:87791452-87804278	NOTEST	0	0	0	0	1	1	no	0
ENSMUSG00000004894	Hapln2	chr3:87825671-87831505	NOTEST	0	0	0	0	1	1	no	0
ENSMUSG00000004895	Prcc	chr3:87662821-87689530	OK	12.4719	13.5506	0.119675	0.440251	0.54985	0.999355	no	-0.119675
ENSMUSG00000004896	Rrnad1	chr3:87723427-87744608	OK	4.15827	4.55748	0.132252	0.198779	0.7768	0.999355	no	-0.132252
ENSMUSG00000004897	Hdgf	chr3:87710242-87720054	OK	21.6656	27.3727	0.337331	1.25774	0.06985	0.628445	no	-0.337331
ENSMUSG00000004902	Slc25a18	chr6:120723785-120744000	NOTEST	0.158415	0.21558	0.444518	0	1	1	no	-0.444518
ENSMUSG00000004929	Thop1	chr10:80532779-80545304	NOTEST	1.10995	1.46481	0.400217	0	1	1	no	-0.400217
ENSMUSG00000004931	Apba3	chr10:80730916-80754012	OK	17.7696	18.2415	0.0378172	0.0615119	0.93335	0.999355	no	-0.0378172
ENSMUSG00000004934	Pias4	chr10:80616010-80630668	OK	9.32672	9.93857	0.0916692	0.262472	0.70415	0.999355	no	-0.0916692
ENSMUSG00000004936	Map2k1	chr9:64033576-64101438	OK	52.6549	54.647	0.0535753	0.192414	0.7761	0.999355	no	-0.0535753
ENSMUSG00000004937	Sgta	chr10:80506819-80522923	OK	22.6662	24.0549	0.0857847	0.327666	0.6499	0.999355	no	-0.0857847
ENSMUSG00000004939	Itgb1bp3	chr10:80657353-80693578	NOTEST	0	0.00563651	inf	0	1	1	no	#VALUE!
ENSMUSG00000004945	5730437N04Rik	chr17:5410863-5440260	OK	10.4546	10.857	0.0544919	0.178319	0.8006	0.999355	no	-0.0544919
ENSMUSG00000004947	Dtx2	chr5:136470669-136508742	NOTEST	2.09443	2.13659	0.0287495	0	1	1	no	-0.0287495
ENSMUSG00000004948	Zp3	chr5:136455968-136464494	NOTEST	0	0	0	0	1	1	no	0
ENSMUSG00000004951	Hspb1	chr5:136363788-136365433	NOTEST	0.073519	0.106087	0.529053	0	1	1	no	-0.529053
ENSMUSG00000004952	Rasa4	chr5:136559785-136587730	OK	3.45965	3.99555	0.207768	0.482772	0.4888	0.999355	no	-0.207768
ENSMUSG00000004961	Syt5	chr7:4491369-4498169	OK	2.22156	2.76111	0.313677	0.851163	0.22775	0.999355	no	-0.313677
ENSMUSG00000004980	Hnrnpa2b1	chr6:51410432-51419893	OK	140.766	129.833	-0.116648	-0.429166	0.55015	0.999355	no	0.116648
ENSMUSG00000004988	Fxyd4	chr6:117883746-117887353	NOTEST	0.128572	0.0770194	-0.739279	0	1	1	no	0.739279
ENSMUSG00000004994	Ccdc130	chr8:86781693-86794279	OK	4.38936	4.51471	0.0406218	0.10303	0.8807	0.999355	no	-0.0406218
ENSMUSG00000004996	Mri1	chr8:86773804-86781225	OK	3.49686	3.98085	0.187017	0.40345	0.554	0.999355	no	-0.187017
ENSMUSG00000005034	Prkacb	chr3:146392542-146475924	OK	3.40106	3.88562	0.19216	0.631169	0.36275	0.999355	no	-0.19216
ENSMUSG00000005043	Sgsh	chr11:119169081-119216850	NOTEST	1.4624	1.19315	-0.293559	0	1	1	no	0.293559
ENSMUSG00000005045	Chd5	chr4:151712759-151764303	NOTEST	0.173044	0.118861	-0.541868	0	1	1	no	0.541868
ENSMUSG00000005054	Cstb	chr10:77888414-77890364	OK	29.5684	25.6884	-0.202943	-0.692075	0.33015	0.999355	no	0.202943
ENSMUSG00000005057	Sh2b2	chr5:136694018-136720773	NOTEST	0.0457161	0.0666043	0.542914	0	1	1	no	-0.542914
ENSMUSG00000005069	Pex5	chr6:124346833-124365085	OK	14.5895	13.9703	-0.0625733	-0.20729	0.76115	0.999355	no	0.0625733
ENSMUSG00000005078	Jkamp	chr12:73186575-73286016	OK	11.893	10.1748	-0.225109	-0.633182	0.36635	0.999355	no	0.225109
ENSMUSG00000005087	Cd44	chr2:102651297-102741822	NOTEST	1.30633	1.30407	-0.00249858	0	1	1	no	0.00249858
ENSMUSG00000005089	Slc1a2	chr2:102498815-102630941	NOTEST	0.0663388	0.0323197	-1.03744	0	1	1	no	1.03744
ENSMUSG00000005102	Eif2ak4	chr2:118214352-118300970	NOTEST	0.709539	0.696053	-0.0276841	0	1	1	no	0.0276841
ENSMUSG00000005103	Wdr1	chr5:38918052-38952905	OK	95.2516	92.4685	-0.0427816	-0.162229	0.8166	0.999355	no	0.0427816
ENSMUSG00000005107	Slc2a9	chr5:38740511-38894382	OK	31.605	38.7403	0.293685	0.753801	0.27185	0.999355	no	-0.293685
ENSMUSG00000005124	Wisp1	chr15:66722881-66754763	NOTEST	0.0273311	0.0443682	0.698984	0	1	1	no	-0.698984
ENSMUSG00000005131	4930550C14Rik	chr9:53213390-53240908	NOTEST	0	0.0352187	inf	0	1	1	no	#VALUE!
ENSMUSG00000005142	Man2b1	chr8:87607167-87622638	OK	18.2077	18.0139	-0.015437	-0.0585822	0.9357	0.999355	no	0.015437
ENSMUSG00000005148	Klf5	chr14:99697909-99712624	OK	72.3679	74.2907	0.0378332	0.149618	0.8411	0.999355	no	-0.0378332
ENSMUSG00000005150	Wdr83	chr8:87595655-87606238	OK	6.85048	6.72296	-0.02711	-0.0541934	0.937	0.999355	no	0.02711
ENSMUSG00000005161	Prdx2	chr8:87480508-87498733	OK	47.1583	48.1776	0.030852	0.108979	0.8772	0.999355	no	-0.030852
ENSMUSG00000005198	Polr2a	chr11:69547498-69572139	OK	32.0641	25.9576	-0.304804	-1.02975	0.09855	0.74134	no	0.304804
ENSMUSG00000005202	Shbg	chr11:69428305-69431407	NOTEST	0	0	0	0	1	1	no	0
ENSMUSG00000005204	Senp3	chr11:69486611-69495586	OK	21.7068	22.0054	0.0197115	0.0408642	0.9482	0.999355	no	-0.0197115
ENSMUSG00000005220	Corin	chr5:72691263-72895712	NOTEST	0	0.00254835	inf	0	1	1	no	#VALUE!
ENSMUSG00000005225	Plekha8	chr6:54527597-54595833	OK	9.55839	9.40398	-0.0234955	-0.0726643	0.9159	0.999355	no	0.0234955
ENSMUSG00000005232	G6pc2	chr2:69049129-69065898	NOTEST	0	0	0	0	1	1	no	0
ENSMUSG00000005233	Spc25	chr2:69031951-69044251	NOTEST	2.58485	2.62646	0.0230359	0	1	1	no	-0.0230359
ENSMUSG00000005237	Dnahc2	chr11:69234310-69362612	NOTEST	0.659341	0.377535	-0.804415	0	1	1	no	0.804415
ENSMUSG00000005251	Ripk4	chr16:97963539-97985344	OK	9.23348	9.45313	0.0339168	0.123728	0.863	0.999355	no	-0.0339168
ENSMUSG00000005262	Ufd1l	chr16:18780539-18835354	OK	17.6685	18.5243	0.0682329	0.202078	0.76915	0.999355	no	-0.0682329
ENSMUSG00000005267	Zfp287	chr11:62513857-62545407	NOTEST	0.550684	0.374992	-0.554364	0	1	1	no	0.554364
ENSMUSG00000005268	Prlr	chr15:10106992-10339908	OK	79.2585	73.6382	-0.106111	-0.258323	0.66615	0.999355	no	0.106111
ENSMUSG00000005299	Letm1	chr5:34082321-34125466	OK	39.0543	33.7691	-0.209778	-0.721266	0.26225	0.999355	no	0.209778
ENSMUSG00000005312	Ubqln1	chr13:58277523-58316997	OK	55.2264	52.0307	-0.0859949	-0.328351	0.6368	0.999355	no	0.0859949
ENSMUSG00000005320	Fgfr4	chr13:55254000-55270120	NOTEST	0.150815	0.303675	1.00974	0	1	1	no	-1.00974
ENSMUSG00000005338	Cadm3	chr1:175264384-175396171	NOTEST	0.0156233	0.0121101	-0.367492	0	1	1	no	0.367492
ENSMUSG00000005339	Fcer1a	chr1:175151401-175157360	NOTEST	0.0220707	0.0287663	0.382246	0	1	1	no	-0.382246
ENSMUSG00000005354	Txn2	chr15:77745476-77759436	OK	45.8263	49.1753	0.101756	0.337372	0.6248	0.999355	no	-0.101756
ENSMUSG00000005355	Casp14	chr10:78174741-78181038	NOTEST	0.04245	0.0292368	-0.537981	0	1	1	no	0.537981
ENSMUSG00000005357	Slc1a6	chr10:78243240-78277570	NOTEST	0	0	0	0	1	1	no	0
ENSMUSG00000005360	Slc1a3	chr15:8584123-8660764	NOTEST	0.701076	0.38558	-0.862542	0	1	1	no	0.862542
ENSMUSG00000005362	Crbn	chr6:106719113-106750068	OK	46.0478	40.483	-0.185816	-0.601263	0.39725	0.999355	no	0.185816
ENSMUSG00000005364	Il5ra	chr6:106660377-106695103	NOTEST	0.0414621	0	#NAME?	0	1	1	no	#NAME?
ENSMUSG00000005370	Msh6	chr17:88374389-88464631	OK	2.65089	2.82574	0.0921537	0.154454	0.82325	0.999355	no	-0.0921537
ENSMUSG00000005371	Fbxo11	chr17:88374389-88464631	OK	17.1855	17.0197	-0.0139858	-0.0422363	0.9525	0.999355	no	0.0139858
ENSMUSG00000005373	Mlxipl	chr5:135582760-135614254	OK	69.0461	66.8464	-0.0467097	-0.116539	0.86895	0.999355	no	0.0467097
ENSMUSG00000005374	Tbl2	chr5:135625526-135639743	OK	5.68963	4.24021	-0.424201	-1.27786	0.0441	0.491033	no	0.424201
ENSMUSG00000005378	Wbscr22	chr5:135528826-135541235	OK	15.5859	18.4414	0.242707	0.537703	0.47125	0.999355	no	-0.242707
ENSMUSG00000005397	Nid1	chr13:13529868-13604542	NOTEST	0.053263	0.0312913	-0.767372	0	1	1	no	0.767372
ENSMUSG00000005410	Mcm5	chr8:77633426-77652338	NOTEST	1.09588	1.2073	0.139704	0	1	1	no	-0.139704
ENSMUSG00000005413	Hmox1	chr8:77617489-77624495	NOTEST	0.216328	0.319712	0.563557	0	1	1	no	-0.563557
ENSMUSG00000005417	Mprip	chr11:59474806-59594362	OK	18.8504	20.6565	0.132006	0.443218	0.5119	0.999355	no	-0.132006
ENSMUSG00000005442	Cic	chr7:26052722-26079178	OK	11.4276	10.5158	-0.119966	-0.222624	0.71995	0.999355	no	0.119966
ENSMUSG00000005447	Pafah1b3	chr7:26080067-26083005	OK	11.0044	11.9316	0.116706	0.370419	0.6135	0.999355	no	-0.116706
ENSMUSG00000005465	Il27ra	chr8:86545369-86566488	NOTEST	0.400893	0.476897	0.250462	0	1	1	no	-0.250462
ENSMUSG00000005469	Prkaca	chr8:86496876-86520344	OK	23.3801	21.7851	-0.101939	-0.389952	0.58705	0.999355	no	0.101939
ENSMUSG00000005470	Asf1b	chr8:86479405-86494096	NOTEST	0.646978	0.60831	-0.0889084	0	1	1	no	0.0889084
ENSMUSG00000005474	Myl10	chr5:137169015-137176964	NOTEST	0	0	0	0	1	1	no	0
ENSMUSG00000005481	Ddx39	chr8:86239075-86265225	OK	8.89321	10.7652	0.275593	0.714413	0.3064	0.999355	no	-0.275593
ENSMUSG00000005483	Dnajb1	chr8:86132073-86135801	OK	20.7442	24.1767	0.220908	0.824834	0.24875	0.999355	no	-0.220908
ENSMUSG00000005493	Msh4	chr3:153520110-153569102	NOTEST	0.00524342	0.0171116	1.70639	0	1	1	no	-1.70639
ENSMUSG00000005501	Usp40	chr1:89841695-89905126	OK	13.8757	13.2492	-0.0666546	-0.250829	0.71465	0.999355	no	0.0666546
ENSMUSG00000005503	Evx1	chr6:52258382-52268372	NOTEST	0	0	0	0	1	1	no	0
ENSMUSG00000005505	Kbtbd4	chr2:90734790-90758415	OK	7.3539	7.00783	-0.0695416	-0.0935581	0.87	0.999355	no	0.0695416
ENSMUSG00000005506	Celf1	chr2:90780538-90859654	OK	27.7804	29.5943	0.0912517	0.200471	0.68655	0.999355	no	-0.0912517
ENSMUSG00000005510	Ndufs3	chr2:90734790-90758415	OK	24.2558	21.4192	-0.179423	-0.342949	0.62885	0.999355	no	0.179423
ENSMUSG00000005514	Por	chr5:136145902-136211196	OK	59.2325	54.7683	-0.11305	-0.375493	0.5977	0.999355	no	0.11305
ENSMUSG00000005533	Igf1r	chr7:75097712-75371484	NOTEST	0.334459	0.282622	-0.242953	0	1	1	no	0.242953
ENSMUSG00000005534	Insr	chr8:3150921-3279617	OK	22.5033	23.2283	0.0457484	0.101921	0.83625	0.999355	no	-0.0457484
ENSMUSG00000005540	Fcer2a	chr8:3681736-3694174	NOTEST	0.649036	0.721797	0.153296	0	1	1	no	-0.153296
ENSMUSG00000005547	Cyp2a5	chr7:27620323-27628567	NOTEST	0	0.0238081	inf	0	1	1	no	#VALUE!
ENSMUSG00000005553	Atp4a	chr7:31497227-31510554	NOTEST	0.0496875	0.0759612	0.612381	0	1	1	no	-0.612381
ENSMUSG00000005566	Trim28	chr7:13609500-13616384	OK	20.6511	21.4969	0.0579112	0.148965	0.8333	0.999355	no	-0.0579112
ENSMUSG00000005575	Ube2m	chr7:13620586-13623622	OK	39.5522	43.4821	0.136665	0.487522	0.4969	0.999355	no	-0.136665
ENSMUSG00000005580	Adcy9	chr16:4287528-4420498	OK	5.54999	4.58633	-0.275147	-0.892453	0.2039	0.969475	no	0.275147
ENSMUSG00000005583	Mef2c	chr13:83643032-83806684	NOTEST	0.296102	0.262293	-0.174914	0	1	1	no	0.174914
ENSMUSG00000005609	Ctr9	chr7:118172464-118199891	OK	10.3516	9.46143	-0.129727	-0.359494	0.5299	0.999355	no	0.129727
ENSMUSG00000005610	Eif4g2	chr7:118211498-118226544	OK	186.65	200.689	0.10463	0.23028	0.67455	0.999355	no	-0.10463
ENSMUSG00000005611	Mrvi1	chr7:118011779-118125975	NOTEST	0.160937	0.104641	-0.621044	0	1	1	no	0.621044
ENSMUSG00000005621	Zfp592	chr7:88138566-88190050	OK	12.3405	13.4401	0.12314	0.235263	0.71245	0.999355	no	-0.12314
ENSMUSG00000005625	Psmd4	chr3:94836615-94846536	OK	34.0231	34.3798	0.0150459	0.0545591	0.93555	0.999355	no	-0.0150459
ENSMUSG00000005628	Tmod4	chr3:94928397-94933131	NOTEST	0.876631	1.28325	0.549761	0	1	1	no	-0.549761
ENSMUSG00000005640	Insrr	chr3:87421480-87628181	NOTEST	0.176242	0.225507	0.355617	0	1	1	no	-0.355617
ENSMUSG00000005649	Cabp5	chr7:13983480-13994236	NOTEST	0	0.00624958	inf	0	1	1	no	#VALUE!
ENSMUSG00000005656	Snx6	chr12:55847335-55896690	OK	30.9464	33.1096	0.0974785	0.362192	0.6117	0.999355	no	-0.0974785
ENSMUSG00000005667	Mthfd2	chr6:83255684-83267600	NOTEST	1.4536	1.86799	0.361861	0	1	1	no	-0.361861
ENSMUSG00000005672	Kit	chr5:75970940-76052747	NOTEST	1.46517	2.19578	0.583661	0	1	1	no	-0.583661
ENSMUSG00000005674	Tomm40l	chr1:173144100-173152645	OK	5.25858	4.77409	-0.139448	-0.194333	0.76715	0.999355	no	0.139448
ENSMUSG00000005677	Nr1i3	chr1:173144100-173152645	OK	28.9976	30.8791	0.0906995	0.274294	0.69485	0.999355	no	-0.0906995
ENSMUSG00000005681	Apoa2	chr1:173155184-173156510	NOTEST	1.86993	2.18382	0.223868	0	1	1	no	-0.223868
ENSMUSG00000005682	Pan2	chr10:127740390-127758403	OK	8.89633	10.9808	0.303699	1.12902	0.11215	0.781646	no	-0.303699
ENSMUSG00000005683	Cs	chr10:127774887-127799535	OK	332.884	313.525	-0.0864417	-0.314542	0.6526	0.999355	no	0.0864417
ENSMUSG00000005686	Ampd3	chr7:117910190-117987971	NOTEST	2.51364	1.87801	-0.420575	0	1	1	no	0.420575
ENSMUSG00000005687	Bcas2	chr3:102975577-102983089	OK	12.8908	11.1325	-0.211564	-0.616839	0.38295	0.999355	no	0.211564
ENSMUSG00000005696	Sh2d1a	chrX:39855629-39876874	NOTEST	0.0393785	0.0893981	1.18284	0	1	1	no	-1.18284
ENSMUSG00000005698	Ctcf	chr8:108160467-108206822	OK	19.0967	17.447	-0.130342	-0.371136	0.5711	0.999355	no	0.130342
ENSMUSG00000005699	Pard6a	chr8:108225053-108227393	NOTEST	0.775741	0.919616	0.245456	0	1	1	no	-0.245456
ENSMUSG00000005705	Agrp	chr8:108090599-108092198	NOTEST	0.127233	0.0568162	-1.1631	0	1	1	no	1.1631
ENSMUSG00000005716	Pvalb	chr15:78021543-78036830	NOTEST	0	0	0	0	1	1	no	0
ENSMUSG00000005718	Tfap4	chr16:4544660-4559720	NOTEST	0.989298	0.924718	-0.0973925	0	1	1	no	0.0973925
ENSMUSG00000005732	Ranbp1	chr16:18239876-18289342	OK	12.168	12.2619	0.0111009	0.0209631	0.97535	0.999355	no	-0.0111009
ENSMUSG00000005763	Cd247	chr1:167711205-167932809	NOTEST	1.30572	0.951829	-0.456074	0	1	1	no	0.456074
ENSMUSG00000005774	Rfx5	chr3:94757996-94765970	NOTEST	2.65795	1.944	-0.451289	0	1	1	no	0.451289
ENSMUSG00000005779	Psmb4	chr3:94688014-94690883	OK	104.885	99.311	-0.0787854	-0.248028	0.72505	0.999355	no	0.0787854
ENSMUSG00000005800	Mmp8	chr9:7558428-7568486	NOTEST	0	0.00490467	inf	0	1	1	no	#VALUE!
ENSMUSG00000005802	Slc30a4	chr2:122506968-122547192	OK	59.8623	66.3726	0.148939	0.564547	0.42735	0.999355	no	-0.148939
ENSMUSG00000005803	Sqrdl	chr2:122590972-122635305	OK	78.4408	95.8423	0.289057	0.962432	0.16255	0.913276	no	-0.289057
ENSMUSG00000005804	Pldn	chr2:122564238-122575211	OK	18.5459	20.1665	0.120858	0.418582	0.53885	0.999355	no	-0.120858
ENSMUSG00000005813	Metap1	chr3:138121923-138152346	OK	15.0328	14.6393	-0.0382694	-0.139161	0.8423	0.999355	no	0.0382694
ENSMUSG00000005823	Gpr108	chr17:57374340-57387082	OK	14.2589	18.3494	0.363871	1.34003	0.0584	0.581084	no	-0.363871
ENSMUSG00000005824	Tnfsf14	chr17:57328914-57333612	NOTEST	0.162373	0.109568	-0.567489	0	1	1	no	0.567489
ENSMUSG00000005836	Gata6	chr18:11049084-11085633	OK	45.1475	51.4976	0.189859	0.698699	0.3283	0.999355	no	-0.189859
ENSMUSG00000005846	Rsl1d1	chr16:11193062-11203424	OK	10.202	12.0329	0.238125	0.756088	0.2913	0.999355	no	-0.238125
ENSMUSG00000005864	Cnga2	chrX:69237187-69255557	NOTEST	0	0	0	0	1	1	no	0
ENSMUSG00000005871	Apc	chr18:34367428-34481843	OK	16.7968	15.0787	-0.155676	-0.35783	0.44715	0.999355	no	0.155676
ENSMUSG00000005881	Ergic3	chr2:155833780-155844015	OK	96.945	98.5754	0.0240618	0.0852856	0.9043	0.999355	no	-0.0240618
ENSMUSG00000005882	Uqcc	chr2:155672629-155756046	OK	9.9591	9.20409	-0.11374	-0.304557	0.62545	0.999355	no	0.11374
ENSMUSG00000005883	Spo11	chr2:172803200-172819077	NOTEST	0.114473	0.0991663	-0.20708	0	1	1	no	0.20708
ENSMUSG00000005886	Ncoa2	chr1:13129185-13364164	OK	13.4578	13.4015	-0.00604617	-0.018362	0.97445	0.999355	no	0.00604617
ENSMUSG00000005891	Prl4a1	chr13:28108080-28115417	NOTEST	0	0	0	0	1	1	no	0
ENSMUSG00000005892	Trh	chr6:92192054-92194644	NOTEST	0.00734637	0.0181875	1.30784	0	1	1	no	-1.30784
ENSMUSG00000005893	Nr2c2	chr6:92041383-92134027	OK	12.6267	12.8684	0.0273545	0.0836148	0.89075	0.999355	no	-0.0273545
ENSMUSG00000005897	Nr2c1	chr10:93610767-93659956	OK	6.93663	7.52759	0.117953	0.412501	0.55375	0.999355	no	-0.117953
ENSMUSG00000005899	Smpd4	chr16:17619446-17644921	OK	2.98945	2.945	-0.021613	-0.0505635	0.92805	0.999355	no	0.021613
ENSMUSG00000005907	Pex1	chr5:3571565-3647934	OK	4.68391	5.17456	0.143725	0.272563	0.66595	0.999355	no	-0.143725
ENSMUSG00000005917	Otx1	chr11:21894766-21902900	NOTEST	0.00443998	0.0163587	1.88144	0	1	1	no	-1.88144
ENSMUSG00000005936	Kctd20	chr17:29088894-29106494	OK	10.3595	9.89604	-0.066037	-0.226514	0.74615	0.999355	no	0.066037
ENSMUSG00000005947	Itgae	chr11:72904084-72960948	OK	5.86173	5.0673	-0.21011	-0.670261	0.3366	0.999355	no	0.21011
ENSMUSG00000005949	Ctns	chr11:72997097-73012544	OK	15.7236	15.2463	-0.044474	-0.149481	0.8266	0.999355	no	0.044474
ENSMUSG00000005950	P2rx5	chr11:72973922-72986187	NOTEST	0.0113577	0.0146912	0.371287	0	1	1	no	-0.371287
ENSMUSG00000005951	Shpk	chr11:73012961-73038013	OK	13.2538	12.0121	-0.141918	-0.52157	0.45995	0.999355	no	0.141918
ENSMUSG00000005952	Trpv1	chr11:73047793-73074744	NOTEST	0.0559498	0.0549041	-0.0272195	0	1	1	no	0.0272195
ENSMUSG00000005958	Ephb3	chr16:21204827-21223378	NOTEST	0.320146	0.366417	0.194757	0	1	1	no	-0.194757
ENSMUSG00000005968	Tuft1	chr3:94416678-94462794	OK	23.5883	23.544	-0.00271282	-0.00890132	0.98925	0.999355	no	0.00271282
ENSMUSG00000005973	Rcn1	chr2:105226447-105239476	NOTEST	1.50645	1.35841	-0.149235	0	1	1	no	0.149235
ENSMUSG00000005980	Dnase1	chr16:4032838-4078410	OK	500.808	647.763	0.371208	1.22579	0.0747	0.651656	no	-0.371208
ENSMUSG00000005981	Trap1	chr16:4032838-4078410	OK	12.7145	12.3833	-0.0380784	-0.0268627	0.96585	0.999355	no	0.0380784
ENSMUSG00000005982	Nat15	chr16:3847267-3941147	OK	33.1618	38.5573	0.217479	0.655761	0.34105	0.999355	no	-0.217479
ENSMUSG00000005983	1700037C18Rik	chr16:3847267-3941147	NOTEST	2.16775	1.34716	-0.686278	0	1	1	no	0.686278
ENSMUSG00000005986	Ankrd13d	chr19:4270179-4283137	NOTEST	0.184286	0.417116	1.17851	0	1	1	no	-1.17851
ENSMUSG00000005994	Tyrp1	chr4:80480026-80497623	NOTEST	0	0	0	0	1	1	no	0
ENSMUSG00000006005	Tpr	chr1:152208434-152313295	OK	21.5725	20.8154	-0.0515418	-0.0867861	0.88185	0.999355	no	0.0515418
ENSMUSG00000006007	Pdc	chr1:152166546-152181035	NOTEST	0	0	0	0	1	1	no	0
ENSMUSG00000006010	BC003331	chr1:152208434-152313295	OK	29.8663	25.0772	-0.252143	-0.426965	0.52975	0.999355	no	0.252143
ENSMUSG00000006014	Prg4	chr1:152208434-152313295	NOTEST	0.122008	0.175432	0.523934	0	1	1	no	-0.523934
ENSMUSG00000006019	Dhx34	chr7:16782495-16807386	NOTEST	1.92869	1.92237	-0.00473363	0	1	1	no	0.00473363
ENSMUSG00000006021	Kptn	chr7:16705243-16712865	OK	6.83959	6.2123	-0.138784	-0.384317	0.58695	0.999355	no	0.138784
ENSMUSG00000006024	Napa	chr7:16683806-16703324	OK	39.2393	40.4523	0.0439229	0.104432	0.88135	0.999355	no	-0.0439229
ENSMUSG00000006050	Sra1	chr18:36826334-36839020	OK	55.2812	52.3663	-0.0781517	-0.252034	0.71715	0.999355	no	0.0781517
ENSMUSG00000006056	Calcoco2	chr11:95960639-95973278	NOTEST	0	0	0	0	1	1	no	0
ENSMUSG00000006057	Atp5g1	chr11:95930165-95936984	NOTEST	2.64308	2.59589	-0.0259932	0	1	1	no	0.0259932
ENSMUSG00000006058	Snf8	chr11:95896198-95908744	OK	24.2775	24.0878	-0.011318	-0.0379722	0.95685	0.999355	no	0.011318
ENSMUSG00000006095	Tbcb	chr7:31009149-31018409	OK	27.1121	31.0276	0.194615	0.557082	0.4454	0.999355	no	-0.194615
ENSMUSG00000006127	Inpp5k	chr11:75444489-75462373	OK	11.0822	11.534	0.0576471	0.167373	0.80565	0.999355	no	-0.0576471
ENSMUSG00000006134	Crkl	chr16:17452079-17486348	OK	14.0402	14.4375	0.0402598	0.149956	0.8308	0.999355	no	-0.0402598
ENSMUSG00000006143	2310043J07Rik	chr5:136530361-136540196	NOTEST	0	0.020126	inf	0	1	1	no	#VALUE!
ENSMUSG00000006154	Eps8l1	chr7:4397298-4431006	NOTEST	1.85146	1.48479	-0.318408	0	1	1	no	0.318408
ENSMUSG00000006169	Clint1	chr11:45665506-45724127	OK	66.2047	62.6219	-0.080265	-0.281331	0.6828	0.999355	no	0.080265
ENSMUSG00000006179	Prss16	chr13:22094044-22101611	NOTEST	0.129855	0.121222	-0.0992426	0	1	1	no	0.0992426
ENSMUSG00000006191	Cdkal1	chr13:29283614-29947543	OK	3.50856	2.42656	-0.531968	-1.1639	0.0782	0.669119	no	0.531968
ENSMUSG00000006200	Rhox6	chrX:35180086-35183034	NOTEST	0	0.0102791	inf	0	1	1	no	#VALUE!
ENSMUSG00000006204	5430419D17Rik	chr7:137305964-140316037	NOTEST	0	0	0	0	1	1	no	0
ENSMUSG00000006205	Htra1	chr7:137305964-140316037	NOTEST	0.102556	0.137216	0.420033	0	1	1	no	-0.420033
ENSMUSG00000006215	Zbtb17	chr4:141000568-141094512	OK	6.33317	6.50262	0.0380941	0.0435186	0.94585	0.999355	no	-0.0380941
ENSMUSG00000006216	Clcnkb	chr4:140954743-140971929	NOTEST	0	0.00468792	inf	0	1	1	no	#VALUE!
ENSMUSG00000006218	Fam131c	chr4:140924134-140940090	NOTEST	0.168838	0.175256	0.0538203	0	1	1	no	-0.0538203
ENSMUSG00000006219	Fblim1	chr4:141131976-141162011	OK	33.3896	34.6369	0.0529123	0.158585	0.80325	0.999355	no	-0.0529123
ENSMUSG00000006221	Hspb7	chr4:140976693-140981226	NOTEST	0.0101872	0.011097	0.123421	0	1	1	no	-0.123421
ENSMUSG00000006235	Epor	chr9:21763342-21768020	NOTEST	0	0.0118714	inf	0	1	1	no	#VALUE!
ENSMUSG00000006241	Ccdc159	chr9:21731914-21740316	NOTEST	0.140047	0.103633	-0.434423	0	1	1	no	0.434423
ENSMUSG00000006262	Mob1b	chr5:89149879-89191083	OK	30.5223	32.6788	0.0984924	0.3347	0.61875	0.999355	no	-0.0984924
ENSMUSG00000006269	Atp6v1b1	chr6:83693010-83708803	NOTEST	0	0	0	0	1	1	no	0
ENSMUSG00000006270	Vax1	chr19:59240676-59245626	NOTEST	0.0226305	0	#NAME?	0	1	1	no	#NAME?
ENSMUSG00000006273	Atp6v1b2	chr8:71561609-71637610	OK	32.7637	28.9478	-0.178644	-0.572286	0.38225	0.999355	no	0.178644
ENSMUSG00000006276	Eps15l1	chr8:74864899-74945373	OK	9.20831	8.61643	-0.095846	-0.33412	0.63845	0.999355	no	0.095846
ENSMUSG00000006281	Tep1	chr14:51443736-51498678	OK	39.1198	31.2171	-0.325562	-1.23858	0.08145	0.679564	no	0.325562
ENSMUSG00000006288	Ttc5	chr14:51385089-51405193	OK	4.25545	4.6117	0.115988	0.359252	0.60605	0.999355	no	-0.115988
ENSMUSG00000006289	Osgep	chr14:51526152-51544568	OK	3.162	2.81033	-0.170095	-0.378845	0.586	0.999355	no	0.170095
ENSMUSG00000006299	Aamp	chr1:74326420-74331254	OK	25.6923	27.247	0.0847631	0.320211	0.6585	0.999355	no	-0.0847631
ENSMUSG00000006301	Tmbim1	chr1:74331503-74400268	OK	110.996	116.474	0.0695041	0.247118	0.7205	0.999355	no	-0.0695041
ENSMUSG00000006304	Arpc2	chr1:74283070-74314783	OK	140.796	154.968	0.138361	0.523376	0.44655	0.999355	no	-0.138361
ENSMUSG00000006307	Wbp7	chr7:31353876-31373745	OK	8.78479	10.2849	0.227447	0.454824	0.46925	0.999355	no	-0.227447
ENSMUSG00000006310	Zbtb32	chr7:31374699-31383928	NOTEST	0.97395	0.697411	-0.481838	0	1	1	no	0.481838
ENSMUSG00000006311	Etv2	chr7:31418634-31421166	NOTEST	0	0	0	0	1	1	no	0
ENSMUSG00000006313	Upk1a	chr7:31388110-31397753	NOTEST	0.369359	0.680081	0.880684	0	1	1	no	-0.880684
ENSMUSG00000006315	Tmem147	chr7:31512719-31514553	OK	28.1429	31.3537	0.155864	0.553887	0.4357	0.999355	no	-0.155864
ENSMUSG00000006333	Rps9	chr7:3655594-3658503	OK	46.5604	66.7363	0.519369	1.87953	0.0088	0.167364	no	-0.519369
ENSMUSG00000006335	Tfpt	chr7:3571925-3581531	OK	3.85361	4.28849	0.154261	0.389351	0.58605	0.999355	no	-0.154261
ENSMUSG00000006342	Susd2	chr10:75099363-75106753	OK	89.1438	123.119	0.465852	1.77354	0.01205	0.211382	no	-0.465852
ENSMUSG00000006344	Ggt5	chr10:75024348-75079713	NOTEST	0.105499	0.133975	0.344745	0	1	1	no	-0.344745
ENSMUSG00000006345	Ggt1	chr10:75024348-75079713	OK	494.176	514.745	0.0588338	0.162764	0.8139	0.999355	no	-0.0588338
ENSMUSG00000006356	Crip2	chr12:114378446-114383715	NOTEST	0.307788	0.514102	0.740118	0	1	1	no	-0.740118
ENSMUSG00000006360	Crip1	chr12:114390222-114392088	OK	3179.14	3622.32	0.188276	0.676604	0.3375	0.999355	no	-0.188276
ENSMUSG00000006362	Cbfa2t3	chr8:122434259-126869624	NOTEST	0.461844	0.459083	-0.00865111	0	1	1	no	0.00865111
ENSMUSG00000006369	Fbln1	chr15:85036378-85116965	OK	148.903	164.629	0.144849	0.539598	0.44925	0.999355	no	-0.144849
ENSMUSG00000006373	Pgrmc1	chrX:34138200-34146074	OK	290.968	293.074	0.0104045	0.0388438	0.9594	0.999355	no	-0.0104045
ENSMUSG00000006378	Gcat	chr15:78861303-78873988	OK	10.3851	9.49076	-0.129926	-0.453161	0.5206	0.999355	no	0.129926
ENSMUSG00000006386	Tek	chr4:94405979-94541667	NOTEST	0.216492	0.125314	-0.788767	0	1	1	no	0.788767
ENSMUSG00000006389	Mpl	chr4:118115019-118130118	NOTEST	0.0136199	0.00399905	-1.76799	0	1	1	no	1.76799
ENSMUSG00000006390	Elovl1	chr4:118100697-118109957	OK	66.6443	65.2655	-0.0301613	-0.106629	0.88085	0.999355	no	0.0301613
ENSMUSG00000006392	Med8	chr4:118081941-118088387	OK	23.0718	26.1127	0.178619	0.603362	0.3922	0.999355	no	-0.178619
ENSMUSG00000006395	Hyi	chr4:118032594-118081878	OK	12.0436	15.3179	0.346952	0.575566	0.40965	0.999355	no	-0.346952
ENSMUSG00000006398	Cdc20	chr4:118100697-118109957	NOTEST	1.61859	1.7275	0.0939527	0	1	1	no	-0.0939527
ENSMUSG00000006403	Adamts4	chr1:173180551-173190768	NOTEST	0.0247492	0.0177776	-0.477318	0	1	1	no	0.477318
ENSMUSG00000006411	Pvrl4	chr1:173300229-173318729	NOTEST	0.0291341	0.0458437	0.654013	0	1	1	no	-0.654013
ENSMUSG00000006412	Pfdn2	chr1:173275800-173290929	OK	10.563	11.3026	0.097631	0.259582	0.70725	0.999355	no	-0.097631
ENSMUSG00000006418	Rnf114	chr2:167306632-167341673	OK	47.3385	45.8705	-0.0454469	-0.142236	0.84135	0.999355	no	0.0454469
ENSMUSG00000006423	C330007P06Rik	chrX:34363731-34414106	OK	4.19953	3.9379	-0.0928032	-0.290666	0.6695	0.999355	no	0.0928032
ENSMUSG00000006435	Neurl1a	chr19:47253309-47333930	NOTEST	0.346711	0.415667	0.261694	0	1	1	no	-0.261694
ENSMUSG00000006442	Srm	chr4:147965611-147969102	NOTEST	0.43761	0.819547	0.905181	0	1	1	no	-0.905181
ENSMUSG00000006445	Epha2	chr4:140857154-140885299	OK	24.2849	23.3303	-0.0578571	-0.191031	0.76285	0.999355	no	0.0578571
ENSMUSG00000006456	Rbm14	chr19:4784298-4811634	OK	16.9565	18.1384	0.0972107	0.333937	0.64285	0.999355	no	-0.0972107
ENSMUSG00000006457	Actn3	chr19:4861222-4877909	NOTEST	0.0395564	0.0185863	-1.08967	0	1	1	no	1.08967
ENSMUSG00000006462	A530013C23Rik	chr2:167516676-167554672	NOTEST	0.00557698	0.00467249	-0.255292	0	1	1	no	0.255292
ENSMUSG00000006463	Zdhhc24	chr19:4878667-4885397	OK	5.97549	6.30707	0.0779127	0.239081	0.7299	0.999355	no	-0.0779127
ENSMUSG00000006464	Bbs1	chr19:4886897-4906627	NOTEST	0.0545353	0.0520773	-0.0665347	0	1	1	no	0.0665347
ENSMUSG00000006469	Slc34a3	chr2:25084417-25089884	NOTEST	1.07924	0.880872	-0.293011	0	1	1	no	0.293011
ENSMUSG00000006471	Ndor1	chr2:25100339-25111872	OK	10.5945	9.72109	-0.124119	-0.286317	0.66085	0.999355	no	0.124119
ENSMUSG00000006476	Nelf	chr2:24909874-24918401	OK	8.67203	10.0991	0.219786	0.578516	0.398	0.999355	no	-0.219786
ENSMUSG00000006488	Prl7a1	chr13:27725248-27734362	NOTEST	0	0	0	0	1	1	no	0
ENSMUSG00000006490	Prl8a9	chr13:27649877-27656473	NOTEST	0	0	0	0	1	1	no	0
ENSMUSG00000006494	Pdk1	chr2:71711280-71741915	OK	6.93941	5.07155	-0.452386	-1.33441	0.0415	0.476524	no	0.452386
ENSMUSG00000006498	Ptbp1	chr10:79314125-79345919	OK	55.7151	52.7597	-0.0786337	-0.220957	0.75015	0.999355	no	0.0786337
ENSMUSG00000006517	Mvd	chr8:122434259-126869624	OK	4.26618	4.91131	0.203162	0.0375584	0.9186	0.999355	no	-0.203162
ENSMUSG00000006519	Cyba	chr8:122434259-126869624	OK	36.6588	12.6781	-1.53182	-0.388853	0.56485	0.999355	no	1.53182
ENSMUSG00000006522	Itih3	chr14:31721758-31736946	NOTEST	0.00480979	0	#NAME?	0	1	1	no	#NAME?
ENSMUSG00000006526	Tmem110	chr14:31638775-31690172	NOTEST	1.66131	1.91782	0.207149	0	1	1	no	-0.207149
ENSMUSG00000006527	Sfmbt1	chr14:31528034-31635899	NOTEST	1.65366	1.55002	-0.0933695	0	1	1	no	0.0933695
ENSMUSG00000006529	Itih1	chr14:31742365-31756475	NOTEST	0	0	0	0	1	1	no	0
ENSMUSG00000006538	Ihh	chr1:74991890-74998246	OK	33.7746	30.736	-0.136008	-0.52549	0.4691	0.999355	no	0.136008
ENSMUSG00000006542	Prkag3	chr1:74786072-74795795	NOTEST	0.259072	0.559615	1.11108	0	1	1	no	-1.11108
ENSMUSG00000006546	Cryba2	chr1:74936507-74939717	NOTEST	0.130465	0.252197	0.950888	0	1	1	no	-0.950888
ENSMUSG00000006567	Atp7b	chr8:23103256-23170777	OK	6.54797	5.82209	-0.169512	-0.621573	0.37285	0.999355	no	0.169512
ENSMUSG00000006570	Defb2	chr8:22950397-22953954	NOTEST	0	0	0	0	1	1	no	0
ENSMUSG00000006574	Slc4a1	chr11:102210137-102227517	NOTEST	0.00249759	0.00219629	-0.185473	0	1	1	no	0.185473
ENSMUSG00000006575	Rundc3a	chr11:102254716-102263869	OK	2.7473	3.93938	0.519956	0.92479	0.19785	0.96879	no	-0.519956
ENSMUSG00000006576	Slc4a3	chr1:75542840-75558747	NOTEST	0.00177778	0.0249755	3.81237	0	1	1	no	-3.81237
ENSMUSG00000006585	Cdt1	chr8:122434259-126869624	OK	3.4999	3.11867	-0.166383	-0.0283293	0.92585	0.999355	no	0.166383
ENSMUSG00000006586	Runx1t1	chr4:13670582-13820796	NOTEST	0.0828279	0.11208	0.436343	0	1	1	no	-0.436343
ENSMUSG00000006587	Snai3	chr8:122434259-126869624	NOTEST	0.132424	0.0818183	-0.694666	0	1	1	no	0.694666
ENSMUSG00000006589	Aprt	chr8:122434259-126869624	OK	90.4054	93.5237	0.048923	0.0281194	0.96945	0.999355	no	-0.048923
ENSMUSG00000006599	Gtf2h1	chr7:54051472-54079170	OK	13.5978	15.5403	0.192639	0.555035	0.4176	0.999355	no	-0.192639
ENSMUSG00000006611	Hfe	chr13:23793902-23802723	NOTEST	0.810147	0.551118	-0.555824	0	1	1	no	0.555824
ENSMUSG00000006638	Abhd1	chr5:31252438-31262703	OK	6.04095	5.72742	-0.0768894	-0.064305	0.93115	0.999355	no	0.0768894
ENSMUSG00000006641	Slc5a6	chr5:31338408-31357006	OK	7.82717	10.0781	0.364661	0.91029	0.1732	0.93612	no	-0.364661
ENSMUSG00000006642	Tcf23	chr5:31271049-31279391	NOTEST	0.0920664	0.391271	2.08742	0	1	1	no	-2.08742
ENSMUSG00000006649	Nphs1	chr7:31243333-31272242	NOTEST	0.00472593	0.0126691	1.42265	0	1	1	no	-1.42265
ENSMUSG00000006651	Aplp1	chr7:31220000-31230580	OK	84.923	90.0986	0.0853488	0.336192	0.6387	0.999355	no	-0.0853488
ENSMUSG00000006673	Qrich1	chr9:108419417-108462498	OK	16.2428	16.4984	0.0225278	0.0837993	0.9054	0.999355	no	-0.0225278
ENSMUSG00000006675	P4htm	chr9:108481156-108499931	NOTEST	0.0856798	0.0394333	-1.11954	0	1	1	no	1.11954
ENSMUSG00000006676	Usp19	chr9:108393019-108404670	OK	12.9051	14.0172	0.11926	0.45633	0.52005	0.999355	no	-0.11926
ENSMUSG00000006678	Pola1	chrX:90550105-90877494	NOTEST	0.382132	0.349723	-0.12786	0	1	1	no	0.12786
ENSMUSG00000006699	Cdc42	chr4:136875610-136913635	OK	203.641	205.839	0.0154937	0.0577465	0.93375	0.999355	no	-0.0154937
ENSMUSG00000006705	Pknox1	chr17:31701693-31744625	OK	5.43607	5.73358	0.0768724	0.253755	0.70845	0.999355	no	-0.0768724
ENSMUSG00000006711	D130043K22Rik	chr13:24937003-24993139	OK	7.64383	9.44864	0.30581	0.572898	0.3488	0.999355	no	-0.30581
ENSMUSG00000006715	Gmnn	chr13:24843713-24853792	OK	10.6069	10.17	-0.0606853	-0.189927	0.78605	0.999355	no	0.0606853
ENSMUSG00000006717	Acot13	chr13:24909816-24923386	OK	36.4079	39.0641	0.101592	0.36194	0.6149	0.999355	no	-0.101592
ENSMUSG00000006720	Zfp184	chr13:22032242-22052648	NOTEST	0.0252009	0.0249592	-0.013907	0	1	1	no	0.013907
ENSMUSG00000006724	Cyp27b1	chr10:126485305-126490062	NOTEST	0.0177937	0.102416	2.525	0	1	1	no	-2.525
ENSMUSG00000006728	Cdk4	chr10:126500589-126507317	OK	9.69522	9.31382	-0.0579006	-0.0890298	0.88375	0.999355	no	0.0579006
ENSMUSG00000006731	B4galnt1	chr10:126602246-126617701	OK	81.86	110.005	0.426333	1.67251	0.0211	0.3062	no	-0.426333
ENSMUSG00000006732	Mettl1	chr10:126468237-126483421	NOTEST	0.895934	1.49289	0.736641	0	1	1	no	-0.736641
ENSMUSG00000006736	Tspan31	chr10:126500589-126507317	OK	46.1966	40.8575	-0.177184	-0.58902	0.3978	0.999355	no	0.177184
ENSMUSG00000006740	Kif5b	chr18:6200999-6242172	OK	63.3751	62.1146	-0.0289836	-0.0931176	0.8928	0.999355	no	0.0289836
ENSMUSG00000006763	Saal1	chr7:53941477-53966050	NOTEST	1.06845	1.00237	-0.0921138	0	1	1	no	0.0921138
ENSMUSG00000006764	Tph2	chr10:114515696-114622078	NOTEST	0	0	0	0	1	1	no	0
ENSMUSG00000006777	Krt23	chr11:99339287-99354451	OK	3.28348	3.8301	0.222158	0.62624	0.37225	0.999355	no	-0.222158
ENSMUSG00000006782	Cnp	chr11:100436217-100565585	OK	5.39732	5.78499	0.10007	0.0927531	0.8907	0.999355	no	-0.10007
ENSMUSG00000006784	Ttc25	chr11:100406920-100433882	NOTEST	0.0743264	0.0226299	-1.71564	0	1	1	no	1.71564
ENSMUSG00000006800	Sulf2	chr2:165818135-165981163	OK	43.3525	38.118	-0.185644	-0.536416	0.3944	0.999355	no	0.185644
ENSMUSG00000006818	Sod2	chr17:13200704-13210985	OK	20.3587	19.0558	-0.0954108	-0.357109	0.6087	0.999355	no	0.0954108
ENSMUSG00000006850	Tmco6	chr18:36894721-36904202	OK	3.30559	3.32184	0.00707739	0.0106001	0.98845	0.999355	no	-0.00707739
ENSMUSG00000006906	Stambp	chr6:83493199-83522498	OK	10.6714	9.67177	-0.141896	-0.497202	0.47975	0.999355	no	0.141896
ENSMUSG00000006920	Ezh1	chr11:101052428-101087777	OK	19.4465	18.8144	-0.0476736	-0.135076	0.82465	0.999355	no	0.0476736
ENSMUSG00000006930	Hap1	chr11:100208640-100217455	NOTEST	0.393262	0.55296	0.491684	0	1	1	no	-0.491684
ENSMUSG00000006931	Leprel4	chr11:100269769-100276150	NOTEST	0.233691	0.769294	1.71893	0	1	1	no	-1.71893
ENSMUSG00000006932	Ctnnb1	chr9:120833572-121186315	OK	273.819	267.239	-0.0350944	-0.123251	0.85645	0.999355	no	0.0350944
ENSMUSG00000006941	Eif1b	chr9:120401723-120404445	OK	9.66616	10.1371	0.068629	0.205883	0.7738	0.999355	no	-0.068629
ENSMUSG00000006948	Klk4	chr7:51136529-51141174	NOTEST	0	0	0	0	1	1	no	0
ENSMUSG00000006958	Chrd	chr16:20725230-20742457	NOTEST	0.0113321	0.00975148	-0.216717	0	1	1	no	0.216717
ENSMUSG00000006998	Psmd2	chr16:20651724-20663487	OK	25.2922	24.2392	-0.0613484	-0.198331	0.76855	0.999355	no	0.0613484
ENSMUSG00000007021	Syngr3	chr17:24822036-24826900	NOTEST	0.0447342	0.0674903	0.593304	0	1	1	no	-0.593304
ENSMUSG00000007029	Vars	chr17:35133680-35153267	OK	4.01793	6.13206	0.60992	0.667468	0.3	0.999355	no	-0.60992
ENSMUSG00000007030	D17H6S56E-3	chr17:35153523-35164961	NOTEST	0.259909	0.213482	-0.283895	0	1	1	no	0.283895
ENSMUSG00000007033	Hspa1l	chr17:35109647-35118733	NOTEST	0.161759	0.172906	0.0961384	0	1	1	no	-0.0961384
ENSMUSG00000007034	Slc44a4	chr17:35051410-35067381	OK	89.2318	60.3488	-0.564233	-2.19685	0.00195	0.0529962	no	0.564233
ENSMUSG00000007035	Msh5	chr17:35165549-35183690	NOTEST	0.573392	1.24159	1.1146	0	1	1	no	-1.1146
ENSMUSG00000007036	Abhd16a	chr17:35226207-35239932	OK	21.6923	20.223	-0.101183	-0.331641	0.62445	0.999355	no	0.101183
ENSMUSG00000007038	Neu1	chr17:35068197-35072898	OK	18.9373	16.5301	-0.196132	-0.684812	0.31205	0.999355	no	0.196132
ENSMUSG00000007039	Ddah2	chr17:35195979-35199040	NOTEST	0.459201	0.82016	0.83678	0	1	1	no	-0.83678
ENSMUSG00000007041	Clic1	chr17:35186910-35195694	OK	96.4255	99.8323	0.0500923	0.188402	0.79615	0.999355	no	-0.0500923
ENSMUSG00000007044	Ly6g6c	chr17:35199637-35206995	NOTEST	8.14e-06	0.0405162	12.2813	0	1	1	no	-12.2813
ENSMUSG00000007050	Lsm2	chr17:35118806-35122836	OK	6.17996	6.41026	0.052786	0.134973	0.8498	0.999355	no	-0.052786
ENSMUSG00000007080	Pole	chr5:110715324-110766493	NOTEST	0.434846	0.805194	0.888832	0	1	1	no	-0.888832
ENSMUSG00000007097	Atp1a2	chr1:174191771-174249972	NOTEST	0.00404768	0.0170726	2.07652	0	1	1	no	-2.07652
ENSMUSG00000007107	Atp1a4	chr1:174153643-174188545	NOTEST	0	0.00350771	inf	0	1	1	no	#VALUE!
ENSMUSG00000007122	Casq1	chr1:174140024-174150026	NOTEST	0.120226	0.0608427	-0.982587	0	1	1	no	0.982587
ENSMUSG00000007207	Stx1a	chr5:135499351-135526970	NOTEST	0.391615	0.49319	0.332708	0	1	1	no	-0.332708
ENSMUSG00000007209	Ceacam9	chr7:17307277-17311459	NOTEST	0	0	0	0	1	1	no	0
ENSMUSG00000007216	Zfp775	chr6:48563178-48573226	NOTEST	0.123285	0.136531	0.147232	0	1	1	no	-0.147232
ENSMUSG00000007279	Scube2	chr7:116942189-117009193	NOTEST	0.00528986	0.00302719	-0.805248	0	1	1	no	0.805248
ENSMUSG00000007338	Mrpl49	chr19:6046575-6057758	OK	11.7107	11.1659	-0.0687335	-0.0909826	0.9001	0.999355	no	0.0687335
ENSMUSG00000007379	Dennd2c	chr3:102906526-102973692	NOTEST	0.0554385	0.0348892	-0.668107	0	1	1	no	0.668107
ENSMUSG00000007411	Mark3	chr12:112812720-112894438	OK	18.1887	18.7795	0.0461236	0.172113	0.80425	0.999355	no	-0.0461236
ENSMUSG00000007415	Gatad1	chr5:3571565-3647934	OK	18.0581	21.0242	0.219404	0.590184	0.40275	0.999355	no	-0.219404
ENSMUSG00000007440	Pcdha4	chr18:37089938-37347311	NOTEST	0.0096033	0.0065652	-0.548691	0	1	1	no	0.548691
ENSMUSG00000007457	2310003L06Rik	chr5:88398483-88401895	NOTEST	0	0	0	0	1	1	no	0
ENSMUSG00000007458	M6pr	chr6:122258737-122267698	OK	33.0293	32.899	-0.0057026	-0.0213388	0.9756	0.999355	no	0.0057026
ENSMUSG00000007476	Lrrc8a	chr2:30093012-30199786	OK	12.4985	11.6373	-0.103002	-0.306735	0.6698	0.999355	no	0.103002
ENSMUSG00000007480	Mc5r	chr18:68497249-68499377	NOTEST	0	0	0	0	1	1	no	0
ENSMUSG00000007564	Ppp2r1a	chr17:21082274-21102880	OK	25.6298	25.2425	-0.0219658	-0.0718013	0.913	0.999355	no	0.0219658
ENSMUSG00000007570	Fance	chr17:28450474-28463513	NOTEST	1.88479	2.21589	0.233481	0	1	1	no	-0.233481
ENSMUSG00000007589	Tinf2	chr14:56291071-56300654	OK	8.80595	8.88661	0.0131543	0.0348779	0.9582	0.999355	no	-0.0131543
ENSMUSG00000007591	Tssk4	chr14:56269018-56271376	NOTEST	0.445094	0.496519	0.157741	0	1	1	no	-0.157741
ENSMUSG00000007594	Hapln4	chr8:72607427-72614761	NOTEST	0.916462	0.793647	-0.207578	0	1	1	no	0.207578
ENSMUSG00000007603	Dus3l	chr17:56904173-56909515	OK	5.17496	5.4628	0.0780914	0.264754	0.71205	0.999355	no	-0.0780914
ENSMUSG00000007610	Gtpbp3	chr8:74012001-74035668	OK	2.7112	2.83993	0.0669242	0.172119	0.80125	0.999355	no	-0.0669242
ENSMUSG00000007613	Tgfbr1	chr4:47366093-47427803	OK	8.24216	7.94542	-0.0528987	-0.191413	0.78255	0.999355	no	0.0528987
ENSMUSG00000007617	Homer1	chr13:94073711-94174917	OK	12.8722	12.2652	-0.069689	-0.245289	0.7226	0.999355	no	0.069689
ENSMUSG00000007646	Rad51c	chr11:87190146-87218456	NOTEST	0.194834	0.162297	-0.263614	0	1	1	no	0.263614
ENSMUSG00000007653	Gabrb2	chr11:42233258-42446092	NOTEST	0.00292837	0.0072099	1.29988	0	1	1	no	-1.29988
ENSMUSG00000007655	Cav1	chr6:17147750-17335604	NOTEST	0.256792	0.214803	-0.257589	0	1	1	no	0.257589
ENSMUSG00000007656	Arpp19	chr9:74885420-74908120	OK	40.1486	40.4429	0.0105365	0.0312353	0.96605	0.999355	no	-0.0105365
ENSMUSG00000007659	Bcl2l1	chr2:152593051-152657464	OK	38.7235	38.5083	-0.00804048	-0.024171	0.97255	0.999355	no	0.00804048
ENSMUSG00000007670	Khsrp	chr17:57160480-57170930	OK	10.4487	10.9601	0.0689409	0.260923	0.7133	0.999355	no	-0.0689409
ENSMUSG00000007682	Dio2	chr12:91962993-91989133	NOTEST	0.00309868	0.0135169	2.12504	0	1	1	no	-2.12504
ENSMUSG00000007721	Ccdc124	chr8:73392125-73397389	OK	22.4194	24.3441	0.118822	0.421245	0.5515	0.999355	no	-0.118822
ENSMUSG00000007739	Cct4	chr11:22890518-22903780	OK	36.6084	43.5308	0.249863	0.851678	0.20505	0.971159	no	-0.249863
ENSMUSG00000007777	0610009B22Rik	chr11:51498887-51502376	OK	18.1291	17.1014	-0.0841944	-0.274082	0.6964	0.999355	no	0.0841944
ENSMUSG00000007783	Cpt1c	chr7:52214742-52230184	NOTEST	0.0263591	0.0365725	0.472458	0	1	1	no	-0.472458
ENSMUSG00000007805	Twist2	chr1:93698037-93744605	NOTEST	0	0	0	0	1	1	no	0
ENSMUSG00000007812	Zfp655	chr5:145992591-146008175	OK	15.8997	18.2803	0.201288	0.660775	0.3386	0.999355	no	-0.201288
ENSMUSG00000007815	Rhoa	chr9:108208535-108240270	OK	54.1658	58.7122	0.116278	0.44219	0.5327	0.999355	no	-0.116278
ENSMUSG00000007817	Zmiz1	chr14:26275222-26486229	OK	34.0295	28.8018	-0.240625	-0.614778	0.26655	0.999355	no	0.240625
ENSMUSG00000007827	Ankrd26	chr6:118452581-118512274	NOTEST	0.274339	0.387896	0.499708	0	1	1	no	-0.499708
ENSMUSG00000007833	Aldh16a1	chr7:52396053-52415439	OK	58.6123	57.1326	-0.0368869	-0.0878127	0.9011	0.999355	no	0.0368869
ENSMUSG00000007836	Hnrnpa0	chr13:58227239-58229917	OK	22.6648	23.0186	0.0223448	0.0841577	0.90275	0.999355	no	-0.0223448
ENSMUSG00000007837	Prrg2	chr7:52308982-52333873	OK	24.6868	25.6911	0.0575251	0.172846	0.8044	0.999355	no	-0.0575251
ENSMUSG00000007850	Hnrnph1	chr11:50190491-50200030	OK	101.704	99.8594	-0.0264072	-0.0713777	0.9224	0.999355	no	0.0264072
ENSMUSG00000007867	1700019E19Rik	chr12:87423512-87503408	OK	7.10241	6.66877	-0.0908897	-0.258223	0.7086	0.999355	no	0.0908897
ENSMUSG00000007872	Id3	chr4:135699411-135701670	OK	54.4698	52.7531	-0.0461988	-0.166952	0.81005	0.999355	no	0.0461988
ENSMUSG00000007877	Tcap	chr11:98245124-98246267	NOTEST	0.0407963	0.0422375	0.0500871	0	1	1	no	-0.0500871
ENSMUSG00000007880	Arid1a	chr4:133234922-133312684	OK	13.9961	13.7331	-0.0273673	-0.0969338	0.87785	0.999355	no	0.0273673
ENSMUSG00000007888	Crlf1	chr8:73017056-73027980	NOTEST	0.0231686	0	#NAME?	0	1	1	no	#NAME?
ENSMUSG00000007891	Ctsd	chr7:149511741-149573943	OK	113.521	113.232	-0.00367048	-0.0140169	0.9843	0.999355	no	0.00367048
ENSMUSG00000007892	Rplp1	chr9:61761090-61762345	OK	71.0764	102.739	0.531535	1.96681	0.0071	0.145632	no	-0.531535
ENSMUSG00000007907	4931407G18Rik	chr5:88408475-88410568	NOTEST	0	0	0	0	1	1	no	0
ENSMUSG00000007908	Hmgcll1	chr9:75623170-75984157	NOTEST	0	0.00355428	inf	0	1	1	no	#VALUE!
ENSMUSG00000007944	Ttc9b	chr7:28438933-28441227	NOTEST	0	0	0	0	1	1	no	0
ENSMUSG00000007946	Phox2a	chr7:108966826-108986740	NOTEST	0	0	0	0	1	1	no	0
ENSMUSG00000007950	Abhd8	chr8:73980598-73987556	NOTEST	0.311982	0.21447	-0.540689	0	1	1	no	0.540689
ENSMUSG00000007989	Fzd3	chr14:65819862-65881300	NOTEST	0.0444131	0.0832337	0.906182	0	1	1	no	-0.906182
ENSMUSG00000008028	1700008O03Rik	chr7:51615412-51655557	NOTEST	0.0625187	0.0177095	-1.81976	0	1	1	no	1.81976
ENSMUSG00000008035	Mid1ip1	chrX:10284301-10296816	OK	6.61061	7.06208	0.0953093	0.219295	0.7327	0.999355	no	-0.0953093
ENSMUSG00000008036	Ap2s1	chr7:17323758-17334643	OK	54.3407	57.5913	0.0838157	0.317264	0.6633	0.999355	no	-0.0838157
ENSMUSG00000008090	Fgfrl1	chr5:109123247-109135969	NOTEST	1.67653	1.02164	-0.714592	0	1	1	no	0.714592
ENSMUSG00000008129	4930432K21Rik	chr8:86671923-86696489	NOTEST	0	0.00487245	inf	0	1	1	no	#VALUE!
ENSMUSG00000008136	Fhl2	chr1:43179918-43220806	OK	20.4438	24.2622	0.247052	0.893363	0.20805	0.978356	no	-0.247052
ENSMUSG00000008140	2310044H10Rik	chr7:51745306-51751899	OK	25.7184	26.1948	0.0264789	0.0965796	0.89245	0.999355	no	-0.0264789
ENSMUSG00000008153	Clstn3	chr6:124380776-124414812	NOTEST	0.0679942	0.057899	-0.231872	0	1	1	no	0.231872
ENSMUSG00000008167	Fbxw9	chr8:87560813-87591023	OK	7.42981	8.10189	0.124933	0.224359	0.74255	0.999355	no	-0.124933
ENSMUSG00000008200	Fnbp4	chr2:90585526-90621178	OK	21.6084	26.6591	0.303036	0.692171	0.31685	0.999355	no	-0.303036
ENSMUSG00000008206	Lass4	chr8:4493025-4525757	OK	2.70991	2.66976	-0.0215396	-0.0436783	0.94335	0.999355	no	0.0215396
ENSMUSG00000008226	Scrn3	chr2:73109981-73175875	OK	5.84076	5.9858	0.0353888	0.0826279	0.90185	0.999355	no	-0.0353888
ENSMUSG00000008301	Phax	chr18:56669340-56747366	OK	6.08655	6.71807	0.142423	0.385697	0.58175	0.999355	no	-0.142423
ENSMUSG00000008307	1700109H08Rik	chr5:3571565-3647934	NOTEST	1.68999	1.76012	0.0586576	0	1	1	no	-0.0586576
ENSMUSG00000008318	Relt	chr7:107994361-108011960	NOTEST	0.129289	0.144324	0.158717	0	1	1	no	-0.158717
ENSMUSG00000008333	Snrpb2	chr2:142888774-142898589	OK	11.4641	9.41313	-0.28438	-0.719755	0.3347	0.999355	no	0.28438
ENSMUSG00000008348	Ubc	chr5:125866334-125870924	OK	34.847	47.0027	0.431709	1.59872	0.0245	0.338941	no	-0.431709
ENSMUSG00000008373	Prpf31	chr7:3581586-3596489	OK	3.94098	4.12521	0.0659157	0.174197	0.7946	0.999355	no	-0.0659157
ENSMUSG00000008384	Sertad1	chr7:28271928-28275335	OK	19.4625	20.7935	0.0954387	0.348601	0.63505	0.999355	no	-0.0954387
ENSMUSG00000008393	Carhsp1	chr16:8658679-8672246	OK	7.90122	9.77801	0.307466	1.09707	0.1215	0.806834	no	-0.307466
ENSMUSG00000008398	Elk3	chr10:92623620-92773880	NOTEST	0.543745	0.441525	-0.300435	0	1	1	no	0.300435
ENSMUSG00000008429	Herpud2	chr9:24912573-24956280	OK	17.056	17.0207	-0.0029918	-0.010999	0.9871	0.999355	no	0.0029918
ENSMUSG00000008435	Rdh13	chr7:4376371-4397251	OK	4.00805	5.52881	0.464069	1.31721	0.04335	0.488498	no	-0.464069
ENSMUSG00000008438	Adam21	chr12:82659570-82669461	NOTEST	0.0788551	0.0936062	0.247399	0	1	1	no	-0.247399
ENSMUSG00000008450	Nutf2	chr8:108384533-108404302	NOTEST	0.168588	0.221873	0.396231	0	1	1	no	-0.396231
ENSMUSG00000008461	Fut1	chr7:52872975-52876429	NOTEST	0.0757196	0.0522079	-0.536399	0	1	1	no	0.536399
ENSMUSG00000008475	Arpc5	chr1:154613671-154622727	OK	119.548	123.433	0.0461377	0.167118	0.8138	0.999355	no	-0.0461377
ENSMUSG00000008482	Rnf151	chr17:24852783-24855002	NOTEST	0.0294847	0.0223619	-0.398922	0	1	1	no	0.398922
ENSMUSG00000008489	Elavl2	chr4:90917453-91067476	NOTEST	0	0.0167627	inf	0	1	1	no	#VALUE!
ENSMUSG00000008496	Pou2f2	chr7:25876927-25944941	NOTEST	0.257039	0.220363	-0.222103	0	1	1	no	0.222103
ENSMUSG00000008575	Nfib	chr4:81936076-82351654	OK	5.42098	5.92213	0.127562	0.45282	0.506	0.999355	no	-0.127562
ENSMUSG00000008590	Htr3b	chr9:48743112-48773095	NOTEST	0	0	0	0	1	1	no	0
ENSMUSG00000008601	Rab25	chr3:88345950-88352222	OK	31.1781	32.8074	0.0734856	0.270803	0.70035	0.999355	no	-0.0734856
ENSMUSG00000008604	Ubqln4	chr3:88357637-88373647	OK	8.49572	8.51514	0.00329435	0.012128	0.98695	0.999355	no	-0.00329435
ENSMUSG00000008658	Rbfox1	chr16:6809314-7412572	NOTEST	0	0.00433517	inf	0	1	1	no	#VALUE!
ENSMUSG00000008668	Rps18	chr17:34088943-34103929	OK	11.2323	13.7906	0.29603	0.404981	0.5814	0.999355	no	-0.29603
ENSMUSG00000008682	Rpl10	chrX:71516150-71518474	OK	9.46502	10.3963	0.13539	0.384161	0.5804	0.999355	no	-0.13539
ENSMUSG00000008683	Rps15a	chr7:125247891-125259700	OK	16.5676	19.1444	0.208551	0.48288	0.49145	0.999355	no	-0.208551
ENSMUSG00000008686	Zfp955a	chr17:33378463-33391985	NOTEST	1.56254	1.5251	-0.0349925	0	1	1	no	0.0349925
ENSMUSG00000008690	Ncaph2	chr15:89186149-89203257	OK	12.7323	14.5338	0.190916	0.424874	0.4963	0.999355	no	-0.190916
ENSMUSG00000008730	Hipk1	chr3:103543288-103595486	OK	14.6561	18.5549	0.340297	1.17634	0.0634	0.602267	no	-0.340297
ENSMUSG00000008734	Gprc5b	chr7:125883739-126138725	NOTEST	0.0174974	0.00882654	-0.987222	0	1	1	no	0.987222
ENSMUSG00000008763	Man1a2	chr3:100366129-100489426	OK	24.2701	24.2651	-0.000300553	-0.000714308	0.99925	0.999726	no	0.000300553
ENSMUSG00000008789	Ceacam5	chr7:18298600-18346475	NOTEST	0	0	0	0	1	1	no	0
ENSMUSG00000008813	Tppp2	chr14:52538099-52540374	NOTEST	0	0	0	0	1	1	no	0
ENSMUSG00000008822	Acyp1	chr12:86613347-86629388	OK	3.59646	4.20612	0.225914	0.500928	0.47165	0.999355	no	-0.225914
ENSMUSG00000008843	Cldn13	chr5:135390118-135391396	NOTEST	0	0.00967384	inf	0	1	1	no	#VALUE!
ENSMUSG00000008845	Cd163	chr6:124254668-124280545	NOTEST	0	0	0	0	1	1	no	0
ENSMUSG00000008855	Hdac5	chr11:102055745-102091480	OK	14.9052	12.7308	-0.227492	-0.627595	0.3574	0.999355	no	0.227492
ENSMUSG00000008859	Rala	chr13:17972408-18036073	OK	24.0258	22.9495	-0.0661225	-0.247831	0.72345	0.999355	no	0.0661225
ENSMUSG00000008874	Clec3a	chr8:116941985-116949746	NOTEST	0	0	0	0	1	1	no	0
ENSMUSG00000008892	Vdac3	chr8:23687572-23704230	OK	8.22932	8.34176	0.0195794	0.0632002	0.9295	0.999355	no	-0.0195794
ENSMUSG00000008932	Slc1a7	chr4:107640936-107686137	NOTEST	0.0689027	0.0672575	-0.0348644	0	1	1	no	0.0348644
ENSMUSG00000008958	Vps72	chr3:94914943-94926973	OK	16.0733	17.148	0.0933787	0.283047	0.69855	0.999355	no	-0.0933787
ENSMUSG00000008976	Gabpa	chr16:84828110-84864024	OK	19.0157	20.2753	0.0925307	0.161243	0.77635	0.999355	no	-0.0925307
ENSMUSG00000008999	Bmp7	chr2:172693512-172765822	NOTEST	0.244927	0.316199	0.36848	0	1	1	no	-0.36848
ENSMUSG00000009013	Dynll1	chr5:115747118-115751008	OK	6.2704	7.40134	0.239229	0.600955	0.4008	0.999355	no	-0.239229
ENSMUSG00000009030	Pdcl	chr2:37205593-37214852	OK	16.2393	13.7533	-0.23971	-0.846931	0.22445	0.999355	no	0.23971
ENSMUSG00000009035	Tmem184b	chr15:79191113-79233733	OK	15.9943	12.6603	-0.337238	-1.29261	0.0788	0.669618	no	0.337238
ENSMUSG00000009047	Gm5965	chr16:88778140-88778773	NOTEST	0	0	0	0	1	1	no	0
ENSMUSG00000009070	Rtdr1	chr10:74420221-74495331	NOTEST	0	0	0	0	1	1	no	0
ENSMUSG00000009073	Nf2	chr11:4665847-4749539	OK	14.1579	12.8924	-0.135089	-0.399517	0.5429	0.999355	no	0.135089
ENSMUSG00000009075	Cabp7	chr11:4604680-4646781	NOTEST	0.02786	0.0459609	0.722213	0	1	1	no	-0.722213
ENSMUSG00000009076	Zmat5	chr11:4604680-4646781	OK	8.4735	9.10734	0.104071	0.32536	0.6528	0.999355	no	-0.104071
ENSMUSG00000009079	Ewsr1	chr11:4969691-5006096	OK	49.0367	49.1222	0.0025156	0.00847593	0.9904	0.999355	no	-0.0025156
ENSMUSG00000009090	Ap1b1	chr11:4886826-4942732	OK	34.7892	27.4841	-0.340039	-1.1384	0.0784	0.669119	no	0.340039
ENSMUSG00000009092	Derl3	chr10:75356142-75358686	NOTEST	0.118159	0.173064	0.550572	0	1	1	no	-0.550572
ENSMUSG00000009093	Gstt4	chr10:75277687-75285288	NOTEST	0.0173886	0.0277419	0.673926	0	1	1	no	-0.673926
ENSMUSG00000009097	Tbx1	chr16:18581805-18588113	NOTEST	0	0.029169	inf	0	1	1	no	#VALUE!
ENSMUSG00000009108	Gnat2	chr3:107895706-107904350	NOTEST	0.479841	0.26114	-0.877735	0	1	1	no	0.877735
ENSMUSG00000009112	Bcl2l13	chr6:120786247-120866871	OK	4.51019	4.57368	0.0201691	0.0583676	0.93425	0.999355	no	-0.0201691
ENSMUSG00000009114	2610028H24Rik	chr10:75911825-75978601	NOTEST	0	0	0	0	1	1	no	0
ENSMUSG00000009115	1700027D21Rik	chr10:76025016-76033277	NOTEST	0	0.0432556	inf	0	1	1	no	#VALUE!
ENSMUSG00000009145	Dqx1	chr6:83007837-83017204	OK	26.8557	25.3471	-0.08341	-0.318826	0.66215	0.999355	no	0.08341
ENSMUSG00000009185	Ccl8	chr11:81928686-81930301	NOTEST	0.0388945	0.0285849	-0.444312	0	1	1	no	0.444312
ENSMUSG00000009207	Lnp	chr2:74358347-74422601	OK	7.19001	5.61928	-0.355608	-1.07728	0.10795	0.773501	no	0.355608
ENSMUSG00000009210	2310007L24Rik	chr11:106226787-106238428	NOTEST	0	0.0172934	inf	0	1	1	no	#VALUE!
ENSMUSG00000009214	Tmem8c	chr2:26917155-26927699	NOTEST	0.0107161	0	#NAME?	0	1	1	no	#NAME?
ENSMUSG00000009216	Fam163b	chr2:26965899-26998011	NOTEST	0	0	0	0	1	1	no	0
ENSMUSG00000009248	Ascl2	chr7:150152726-150155169	NOTEST	0.10216	0.23714	1.21491	0	1	1	no	-1.21491
ENSMUSG00000009281	Rarres2	chr6:48504794-48522669	NOTEST	0.428048	0.81762	0.933657	0	1	1	no	-0.933657
ENSMUSG00000009291	Pttg1ip	chr10:77044464-77061477	OK	153.609	154.275	0.00623452	0.0226753	0.9696	0.999355	no	-0.00623452
ENSMUSG00000009292	Trpm2	chr10:77370466-77433308	NOTEST	0.489765	0.775287	0.66264	0	1	1	no	-0.66264
ENSMUSG00000009293	Ube2g2	chr10:77068841-77108738	OK	6.77532	7.58709	0.163259	0.237957	0.68595	0.999355	no	-0.163259
ENSMUSG00000009350	Mpo	chr11:87607082-87617915	NOTEST	0	0	0	0	1	1	no	0
ENSMUSG00000009356	Lpo	chr11:87619929-87641791	NOTEST	0.00414306	0	#NAME?	0	1	1	no	#NAME?
ENSMUSG00000009376	Met	chr6:17413799-17523980	OK	12.9277	10.9812	-0.23543	-0.690965	0.25245	0.999355	no	0.23543
ENSMUSG00000009378	Slc16a12	chr19:34742892-34821779	NOTEST	0.139434	0.0940712	-0.567752	0	1	1	no	0.567752
ENSMUSG00000009394	Syn2	chr6:115084919-115232644	NOTEST	0.262636	0.271969	0.0503783	0	1	1	no	-0.0503783
ENSMUSG00000009406	Elk1	chrX:20510520-20563863	NOTEST	0.347059	0.341306	-0.0241126	0	1	1	no	0.0241126
ENSMUSG00000009418	Nav1	chr1:137331156-137496527	NOTEST	0.11832	0.161792	0.451445	0	1	1	no	-0.451445
ENSMUSG00000009470	Tnpo1	chr13:99608973-99696339	OK	17.209	16.325	-0.0760786	-0.288171	0.68165	0.999355	no	0.0760786
ENSMUSG00000009471	Myod1	chr7:53631843-53634462	NOTEST	0	0	0	0	1	1	no	0
ENSMUSG00000009487	Otog	chr7:53496356-53566804	NOTEST	0.00614066	0.00321593	-0.933158	0	1	1	no	0.933158
ENSMUSG00000009535	Rnmt	chr18:68460008-68484506	OK	6.99044	6.23876	-0.164122	-0.434103	0.542	0.999355	no	0.164122
ENSMUSG00000009545	Kcnq1	chr7:150293158-150612955	OK	4.40275	3.38328	-0.379984	-1.1699	0.0903	0.710793	no	0.379984
ENSMUSG00000009549	Srp14	chr2:118301585-118305447	OK	29.057	25.5888	-0.183373	-0.601903	0.3931	0.999355	no	0.183373
ENSMUSG00000009551	6330409D20Rik	chr2:32576574-32611032	NOTEST	0.042668	0.131687	1.62588	0	1	1	no	-1.62588
ENSMUSG00000009555	Cdk9	chr2:32561303-32568596	OK	9.91665	11.3795	0.198514	0.596043	0.3891	0.999355	no	-0.198514
ENSMUSG00000009563	Tor2a	chr2:32612545-32631153	OK	24.8071	27.7687	0.162704	0.58781	0.4189	0.999355	no	-0.162704
ENSMUSG00000009566	Fpgs	chr2:32477277-32559657	NOTEST	0.741879	0.862843	0.217914	0	1	1	no	-0.217914
ENSMUSG00000009569	Mkl2	chr16:13256573-13417622	OK	7.33153	7.35157	0.00393814	0.00756258	0.99055	0.999355	no	-0.00393814
ENSMUSG00000009575	Cbx5	chr15:103021974-103070247	OK	5.76267	6.23168	0.112884	0.402234	0.54895	0.999355	no	-0.112884
ENSMUSG00000009580	Odam	chr5:88314053-88323199	NOTEST	0	0	0	0	1	1	no	0
ENSMUSG00000009585	Apobec3	chr15:79722088-79801549	OK	6.31597	4.628	-0.448616	-1.02041	0.1232	0.808696	no	0.448616
ENSMUSG00000009588	St6galnac1	chr11:116600307-116636821	NOTEST	0.025833	0.0126111	-1.03452	0	1	1	no	1.03452
ENSMUSG00000009596	Taf7l	chrX:130994656-131011029	NOTEST	0	0	0	0	1	1	no	0
ENSMUSG00000009614	Sardh	chr2:27043912-27103857	OK	3.02091	3.37832	0.161324	0.341358	0.61295	0.999355	no	-0.161324
ENSMUSG00000009621	Vav2	chr2:27117623-27282553	OK	20.432	17.0408	-0.261834	-0.784239	0.19275	0.959676	no	0.261834
ENSMUSG00000009628	Tex15	chr8:34627209-34696054	NOTEST	0.0187435	0.0145914	-0.361271	0	1	1	no	0.361271
ENSMUSG00000009630	Ppp2cb	chr8:34710092-34752448	OK	23.2815	26.9854	0.212996	0.633787	0.3697	0.999355	no	-0.212996
ENSMUSG00000009633	G0s2	chr1:195098354-195099382	NOTEST	0.12606	0.137809	0.128557	0	1	1	no	-0.128557
ENSMUSG00000009640	Dmap1	chr4:117347285-117354878	OK	5.48504	4.92521	-0.155318	-0.471298	0.50425	0.999355	no	0.155318
ENSMUSG00000009646	Pla2g12b	chr10:58866407-58884724	OK	94.7141	110.534	0.222835	0.849593	0.2351	0.999355	no	-0.222835
ENSMUSG00000009647	Ccdc109a	chr10:58909731-59079440	OK	100.9	104.122	0.0453446	0.161334	0.8148	0.999355	no	-0.0453446
ENSMUSG00000009654	Oit3	chr10:58885705-58904526	NOTEST	0.371081	0.361418	-0.0380662	0	1	1	no	0.0380662
ENSMUSG00000009670	Tex11	chrX:98033986-98255006	NOTEST	0	0	0	0	1	1	no	0
ENSMUSG00000009681	Bcr	chr10:74523640-74647668	OK	18.1146	16.6542	-0.121267	-0.444252	0.53465	0.999355	no	0.121267
ENSMUSG00000009687	Fxyd5	chr7:31817740-31827500	OK	3.13412	2.13748	-0.552147	-1.05836	0.1227	0.808696	no	0.552147
ENSMUSG00000009731	Kcnd1	chrX:7399414-7415406	NOTEST	0.14458	0.254377	0.815104	0	1	1	no	-0.815104
ENSMUSG00000009733	Tfcp2	chr15:100333229-100382439	NOTEST	1.42676	1.50595	0.077926	0	1	1	no	-0.077926
ENSMUSG00000009734	Pou6f2	chr13:18212934-18473875	NOTEST	0.00310835	0.0134645	2.11494	0	1	1	no	-2.11494
ENSMUSG00000009739	Pou6f1	chr15:100405748-100430415	NOTEST	0.270523	0.223315	-0.276668	0	1	1	no	0.276668
ENSMUSG00000009741	Ubp1	chr9:113840051-113955309	OK	21.1988	24.1818	0.189936	0.707898	0.31	0.999355	no	-0.189936
ENSMUSG00000009772	Nuak2	chr1:134212702-134230065	OK	58.481	42.7958	-0.450497	-1.36173	0.05525	0.567069	no	0.450497
ENSMUSG00000009828	Ick	chr9:77956998-78019914	OK	15.7108	18.0996	0.2042	0.452279	0.49935	0.999355	no	-0.2042
ENSMUSG00000009863	Sdhb	chr4:140517117-140535108	OK	144.517	128.605	-0.168295	-0.651474	0.3561	0.999355	no	0.168295
ENSMUSG00000009876	Cox4i2	chr2:152579908-152590773	NOTEST	0.0178652	0.0543825	1.60599	0	1	1	no	-1.60599
ENSMUSG00000009894	Snap47	chr11:59220635-59272069	OK	4.78185	4.13946	-0.208126	-0.473137	0.4863	0.999355	no	0.208126
ENSMUSG00000009900	Wnt3a	chr11:59061534-59104254	NOTEST	0	0	0	0	1	1	no	0
ENSMUSG00000009905	Kdsr	chr1:108616986-108656319	OK	7.6436	9.48089	0.310771	1.13415	0.11055	0.779963	no	-0.310771
ENSMUSG00000009907	Vps4b	chr1:108660647-108693305	OK	47.666	43.1477	-0.143677	-0.370073	0.57675	0.999355	no	0.143677
ENSMUSG00000009927	Rps25	chr9:44215796-44226090	NOTEST	1.38509	1.18909	-0.220119	0	1	1	no	0.220119
ENSMUSG00000009941	Nxf2	chrX:131479064-131499293	NOTEST	0	0	0	0	1	1	no	0
ENSMUSG00000009995	Taz	chrX:71518555-71535490	OK	31.2602	28.4106	-0.137894	-0.356746	0.5904	0.999355	no	0.137894
ENSMUSG00000010021	Kif19a	chr11:114626701-114652053	NOTEST	0.145336	0.21688	0.577505	0	1	1	no	-0.577505
ENSMUSG00000010025	Aldh3a2	chr11:61036918-61080966	OK	81.7924	119.957	0.552476	1.95859	0.00285	0.0711416	no	-0.552476
ENSMUSG00000010044	Zmynd10	chr9:107449638-107453650	NOTEST	0.0544295	0.114384	1.07142	0	1	1	no	-1.07142
ENSMUSG00000010045	Tmem115	chr9:107436275-107440987	OK	18.7715	20.0308	0.0936722	0.359126	0.61935	0.999355	no	-0.0936722
ENSMUSG00000010047	Hyal2	chr9:107471447-107475107	OK	28.4564	27.0911	-0.0709305	-0.272738	0.7083	0.999355	no	0.0709305
ENSMUSG00000010048	Ifrd2	chr9:107490048-107495369	OK	6.32052	8.23152	0.381115	1.29481	0.0735	0.648294	no	-0.381115
ENSMUSG00000010051	Hyal1	chr9:107478150-107489756	NOTEST	0.712788	0.769582	0.110603	0	1	1	no	-0.110603
ENSMUSG00000010054	Tusc2	chr9:107453885-107470746	OK	7.91413	9.64028	0.284645	0.475536	0.51375	0.999355	no	-0.284645
ENSMUSG00000010057	Nprl2	chr9:107444539-107448035	OK	6.2356	6.7346	0.111064	0.340646	0.62605	0.999355	no	-0.111064
ENSMUSG00000010064	Slc38a3	chr9:107552969-107569705	NOTEST	0.0351045	0.0744451	1.08452	0	1	1	no	-1.08452
ENSMUSG00000010066	Cacna2d2	chr9:107301942-107431677	NOTEST	0.0975743	0.257258	1.39864	0	1	1	no	-1.39864
ENSMUSG00000010067	Rassf1	chr9:107453885-107470746	OK	20.3834	22.4232	0.137601	0.336186	0.6338	0.999355	no	-0.137601
ENSMUSG00000010080	Epn3	chr11:94350912-94361288	NOTEST	0.120199	0.208676	0.79584	0	1	1	no	-0.79584
ENSMUSG00000010086	Rnf112	chr11:61261943-61267633	NOTEST	0.00719878	0.0401441	2.47936	0	1	1	no	-2.47936
ENSMUSG00000010095	Slc3a2	chr19:8781371-8797859	OK	164.274	177.504	0.111749	0.42143	0.5475	0.999355	no	-0.111749
ENSMUSG00000010097	Nxf1	chr19:8831592-8845399	OK	24.3265	29.3535	0.271006	1.01306	0.1506	0.889654	no	-0.271006
ENSMUSG00000010110	Stx5a	chr19:8815902-8830559	OK	58.8765	60.3854	0.0365084	0.118073	0.86605	0.999355	no	-0.0365084
ENSMUSG00000010136	1700027A23Rik	chr3:105799874-105817523	NOTEST	0	0	0	0	1	1	no	0
ENSMUSG00000010142	Tnfrsf13b	chr11:60940256-60962874	NOTEST	0.445779	0.213606	-1.06138	0	1	1	no	1.06138
ENSMUSG00000010154	Spire2	chr8:122434259-126869624	OK	10.7308	14.1964	0.403764	0.153473	0.8276	0.999355	no	-0.403764
ENSMUSG00000010175	Prox1	chr1:191941916-192041155	NOTEST	0.223499	0.441743	0.982942	0	1	1	no	-0.982942
ENSMUSG00000010205	Raver1	chr9:20878611-20932837	OK	16.9519	16.7832	-0.0144223	-0.0414608	0.95425	0.999355	no	0.0144223
ENSMUSG00000010277	2610507B11Rik	chr11:78075253-78104125	OK	61.246	74.3004	0.278755	0.555951	0.34525	0.999355	no	-0.278755
ENSMUSG00000010290	AI597479	chr1:43155554-43172792	OK	4.04241	4.10575	0.0224271	0.073696	0.91475	0.999355	no	-0.0224271
ENSMUSG00000010307	Tmem86a	chr7:54306009-54310146	OK	115.942	117.217	0.0157676	0.0604184	0.93015	0.999355	no	-0.0157676
ENSMUSG00000010311	Optc	chr1:135793772-135817991	NOTEST	0	0	0	0	1	1	no	0
ENSMUSG00000010342	Tex14	chr11:87218566-87369325	NOTEST	0.0169298	0.0594414	1.8119	0	1	1	no	-1.8119
ENSMUSG00000010358	Ifi35	chr11:101309720-101320012	OK	76.8455	64.7917	-0.246153	-0.928145	0.18645	0.947021	no	0.246153
ENSMUSG00000010362	Rdm1	chr11:101488508-101497414	OK	7.06749	5.96043	-0.245781	-0.534352	0.4525	0.999355	no	0.245781
ENSMUSG00000010376	Nedd8	chr14:56281101-56290743	OK	42.1175	45.7731	0.120081	0.441225	0.53095	0.999355	no	-0.120081
ENSMUSG00000010392	Gosr1	chr11:76540103-76577081	OK	20.2502	18.2072	-0.153425	-0.574796	0.40875	0.999355	no	0.153425
ENSMUSG00000010406	Mrpl52	chr14:55045745-55048587	OK	18.5012	20.4084	0.141546	0.417411	0.55415	0.999355	no	-0.141546
ENSMUSG00000010435	Spaca7	chr8:12573048-12600738	NOTEST	0	0	0	0	1	1	no	0
ENSMUSG00000010453	4632411B12Rik	chr1:36392574-36426026	OK	16.2306	17.8519	0.137362	0.521573	0.4639	0.999355	no	-0.137362
ENSMUSG00000010461	Eya4	chr10:22823973-23069701	NOTEST	0	0	0	0	1	1	no	0
ENSMUSG00000010476	Ebf3	chr7:144385355-144506128	NOTEST	0.00688929	0.00340991	-1.01462	0	1	1	no	1.01462
ENSMUSG00000010492	Gm16119	chr2:181303853-181390365	NOTEST	0.772365	1.3123	0.764739	0	1	1	no	-0.764739
ENSMUSG00000010505	Myt1	chr2:181498036-181562502	NOTEST	0.333694	0.429254	0.363306	0	1	1	no	-0.363306
ENSMUSG00000010517	Faf1	chr4:109349192-109636565	OK	13.2905	12.8078	-0.0533722	-0.141709	0.83145	0.999355	no	0.0533722
ENSMUSG00000010529	Gm266	chr12:112722821-112724034	NOTEST	0	0.0106236	inf	0	1	1	no	#VALUE!
ENSMUSG00000010538	1700021C14Rik	chr3:88046795-88100921	NOTEST	0.454605	0.4863	0.0972338	0	1	1	no	-0.0972338
ENSMUSG00000010554	Mettl16	chr11:74584331-74642027	NOTEST	1.9137	2.25213	0.234927	0	1	1	no	-0.234927
ENSMUSG00000010592	Dazl	chr17:50418718-50432924	NOTEST	0.0355683	0.0439014	0.303677	0	1	1	no	-0.303677
ENSMUSG00000010601	Apol7a	chr15:77218646-77229540	OK	164.997	150.082	-0.136687	-0.435601	0.5084	0.999355	no	0.136687
ENSMUSG00000010607	Pigyl	chr9:21961289-21962802	OK	5.78165	6.1845	0.0971768	0.255738	0.72025	0.999355	no	-0.0971768
ENSMUSG00000010608	Rbm25	chr12:84973183-85024073	OK	24.5358	27.1612	0.14666	0.558001	0.4296	0.999355	no	-0.14666
ENSMUSG00000010609	Psen2	chr1:182157134-182193569	OK	2.85992	4.16504	0.542355	1.32415	0.03965	0.463951	no	-0.542355
ENSMUSG00000010651	Acaa1b	chr9:119011595-119066211	OK	8.6349	7.34207	-0.233992	-0.708945	0.31105	0.999355	no	0.233992
ENSMUSG00000010660	Plcd1	chr9:118980644-119002614	OK	7.53143	8.23365	0.12861	0.458681	0.52035	0.999355	no	-0.12861
ENSMUSG00000010663	Fads1	chr19:10257377-10271360	NOTEST	1.40218	1.03608	-0.436538	0	1	1	no	0.436538
ENSMUSG00000010721	Lmbr1	chr5:29556353-29704930	NOTEST	2.27684	2.31776	0.0256951	0	1	1	no	-0.0256951
ENSMUSG00000010751	Tnfrsf22	chr7:150820710-150835566	NOTEST	0.0140357	0.00965533	-0.539707	0	1	1	no	0.539707
ENSMUSG00000010755	Cars	chr7:150743134-150785995	OK	7.31052	10.5903	0.5347	1.50451	0.0328	0.415015	no	-0.5347
ENSMUSG00000010760	Phlda2	chr7:150687449-150688446	NOTEST	0.144625	0.270146	0.901424	0	1	1	no	-0.901424
ENSMUSG00000010796	Asz1	chr6:18000963-18059061	NOTEST	0.0116469	0	#NAME?	0	1	1	no	#NAME?
ENSMUSG00000010797	Wnt2	chr6:17938939-17980585	NOTEST	0	0	0	0	1	1	no	0
ENSMUSG00000010803	Gabra1	chr11:41944440-41996432	NOTEST	0.161288	0.304472	0.916668	0	1	1	no	-0.916668
ENSMUSG00000010825	Grid2ip	chr5:144119016-144165427	NOTEST	0.0145651	0.00921256	-0.660841	0	1	1	no	0.660841
ENSMUSG00000010830	Kdelr3	chr15:79346837-79377171	OK	12.7998	2.6396	-2.27773	-1.23239	0.28695	0.999355	no	2.27773
ENSMUSG00000010841	1700006E09Rik	chr11:101832456-101853578	NOTEST	0	0.0711228	inf	0	1	1	no	#VALUE!
ENSMUSG00000010911	Apip	chr2:102913831-102932801	NOTEST	1.01292	1.08528	0.0995455	0	1	1	no	-0.0995455
ENSMUSG00000010914	Pdhx	chr2:102861231-102913670	OK	5.53404	4.45801	-0.311934	-0.983636	0.15835	0.909209	no	0.311934
ENSMUSG00000010936	Vac14	chr8:113142502-113244296	OK	4.25866	4.37983	0.040475	0.134238	0.85095	0.999355	no	-0.040475
ENSMUSG00000011008	Mcoln2	chr3:145812796-145858477	OK	14.0013	10.9206	-0.358514	-1.0182	0.1195	0.799683	no	0.358514
ENSMUSG00000011052	1700049J03Rik	chr17:26691198-26793876	NOTEST	0	0	0	0	1	1	no	0
ENSMUSG00000011096	Akt1s1	chr7:52096270-52110788	OK	13.7071	14.4229	0.0734366	0.19164	0.7744	0.999355	no	-0.0734366
ENSMUSG00000011114	Tbrg1	chr9:37456766-37464897	OK	68.1982	64.0511	-0.0905102	-0.341942	0.63545	0.999355	no	0.0905102
ENSMUSG00000011118	Panx3	chr9:37467486-37476807	NOTEST	0	0	0	0	1	1	no	0
ENSMUSG00000011148	Adssl1	chr12:113858257-113879565	NOTEST	0.0163536	0.012665	-0.368764	0	1	1	no	0.368764
ENSMUSG00000011154	1700026D08Rik	chr7:90922610-90943390	NOTEST	0.0425686	0	#NAME?	0	1	1	no	#NAME?
ENSMUSG00000011158	Brf1	chr12:114198072-114238832	OK	6.89546	7.36432	0.0949044	0.253733	0.71885	0.999355	no	-0.0949044
ENSMUSG00000011171	Vipr2	chr12:117316195-117384734	NOTEST	0.0807717	0.141603	0.809929	0	1	1	no	-0.809929
ENSMUSG00000011179	Odc1	chr12:17551678-17558308	OK	11.9919	17.3021	0.528892	1.8896	0.0079	0.156063	no	-0.528892
ENSMUSG00000011254	Thg1l	chr11:45760344-45768996	NOTEST	1.12022	1.12845	0.0105664	0	1	1	no	-0.0105664
ENSMUSG00000011256	Adam19	chr11:45868003-45960845	NOTEST	0.48894	0.497193	0.0241472	0	1	1	no	-0.0241472
ENSMUSG00000011257	Pabpc4	chr4:122939593-122976168	OK	3.1835	4.0817	0.358553	0.920537	0.17895	0.938513	no	-0.358553
ENSMUSG00000011263	Exoc3l2	chr7:20074404-20082109	NOTEST	0.0114728	0	#NAME?	0	1	1	no	#NAME?
ENSMUSG00000011267	Zfp296	chr7:20162635-20166005	NOTEST	0.220516	0.265856	0.269764	0	1	1	no	-0.269764
ENSMUSG00000011305	Plin5	chr17:56251023-56257019	NOTEST	0.0135962	0.0158195	0.218497	0	1	1	no	-0.218497
ENSMUSG00000011306	Sugp1	chr8:72566711-72595852	OK	7.7363	6.90327	-0.164362	-0.569754	0.41835	0.999355	no	0.164362
ENSMUSG00000011349	Dmrtc2	chr7:25655075-25662670	NOTEST	0	0	0	0	1	1	no	0
ENSMUSG00000011350	Gm5893	chr7:25603813-25625294	NOTEST	0	0	0	0	1	1	no	0
ENSMUSG00000011382	Dhdh	chr7:52728325-52781638	NOTEST	0.0766585	0.0760629	-0.0112539	0	1	1	no	0.0112539
ENSMUSG00000011427	Zfp790	chr7:30601090-30617061	OK	3.30036	3.58202	0.118151	0.394102	0.57655	0.999355	no	-0.118151
ENSMUSG00000011463	Cpb1	chr3:20148162-20174655	NOTEST	0	0.00948923	inf	0	1	1	no	#VALUE!
ENSMUSG00000011486	Slc25a41	chr17:57172195-57181077	NOTEST	0	0	0	0	1	1	no	0
ENSMUSG00000011589	Fsd1	chr17:56125933-56136304	NOTEST	0.362993	0.398878	0.136004	0	1	1	no	-0.136004
ENSMUSG00000011632	2310033E01Rik	chr7:25326717-25331090	NOTEST	0	0	0	0	1	1	no	0
ENSMUSG00000011658	Fuz	chr7:52151448-52184866	NOTEST	1.84897	2.10279	0.185583	0	1	1	no	-0.185583
ENSMUSG00000011751	Spnb4	chr7:28127151-28232705	NOTEST	0.0227258	0.0147045	-0.62807	0	1	1	no	0.62807
ENSMUSG00000011752	Pgam1	chr19:41986360-41993154	NOTEST	2.34186	2.62448	0.164378	0	1	1	no	-0.164378
ENSMUSG00000011831	Evi5	chr5:108173813-108304126	OK	4.74098	4.90126	0.0479669	0.128288	0.82715	0.999355	no	-0.0479669
ENSMUSG00000011832	Evi5l	chr8:4162521-4217459	NOTEST	0.395173	0.279674	-0.498741	0	1	1	no	0.498741
ENSMUSG00000011837	Snapc2	chr8:4253101-4256219	NOTEST	2.10909	1.9325	-0.126157	0	1	1	no	0.126157
ENSMUSG00000011877	Git1	chr11:77307063-77321288	OK	22.2078	21.2149	-0.0659915	-0.235034	0.7381	0.999355	no	0.0659915
ENSMUSG00000011884	Gltp	chr5:115119411-115140993	OK	51.9801	57.555	0.146984	0.561981	0.4227	0.999355	no	-0.146984
ENSMUSG00000011958	Bnip2	chr9:69837272-69856124	OK	12.1959	11.704	-0.0593991	-0.157888	0.82075	0.999355	no	0.0593991
ENSMUSG00000011960	Ccnt1	chr15:98369119-98401354	OK	14.2425	17.3452	0.284336	0.555235	0.4019	0.999355	no	-0.284336
ENSMUSG00000012017	Scarf2	chr16:17797374-17808380	NOTEST	0.1223	0.0890167	-0.458278	0	1	1	no	0.458278
ENSMUSG00000012042	4930579F01Rik	chr3:137827098-137849677	NOTEST	0	0	0	0	1	1	no	0
ENSMUSG00000012076	Brms1l	chr12:56937352-56970722	NOTEST	1.61101	2.00367	0.314681	0	1	1	no	-0.314681
ENSMUSG00000012114	Med15	chr16:17651300-17723040	OK	20.7634	21.0657	0.0208516	0.0732949	0.91725	0.999355	no	-0.0208516
ENSMUSG00000012117	Dhdds	chr4:133524942-133556833	OK	7.60498	7.0475	-0.109834	-0.319149	0.642	0.999355	no	0.109834
ENSMUSG00000012123	Aim1l	chr4:133621826-133650997	OK	24.3397	24.5667	0.0133909	0.0259448	0.96895	0.999355	no	-0.0133909
ENSMUSG00000012126	Ubxn11	chr4:133658484-133684704	NOTEST	0.48212	0.396365	-0.282562	0	1	1	no	0.282562
ENSMUSG00000012187	Mogat1	chr1:78494380-78534748	NOTEST	0	0	0	0	1	1	no	0
ENSMUSG00000012211	Tex22	chr12:114312712-114327128	NOTEST	0.0570804	0.019852	-1.52371	0	1	1	no	1.52371
ENSMUSG00000012282	Wnt8a	chr18:34701966-34707927	NOTEST	0	0.00621652	inf	0	1	1	no	#VALUE!
ENSMUSG00000012296	Tjap1	chr17:46394824-46419962	OK	12.5645	13.9178	0.147585	0.546108	0.45035	0.999355	no	-0.147585
ENSMUSG00000012350	Ehf	chr2:103103589-103143435	OK	6.08622	9.20575	0.596989	1.78984	0.00715	0.145632	no	-0.596989
ENSMUSG00000012396	Nanog	chr6:122657506-122664651	NOTEST	0	0	0	0	1	1	no	0
ENSMUSG00000012405	Rpl15	chr14:19100336-19164373	OK	4.20111	4.67207	0.153293	0.21406	0.7527	0.999355	no	-0.153293
ENSMUSG00000012422	Tmem167	chr13:89794914-90283512	OK	23.6199	20.4026	-0.21125	-0.558531	0.4308	0.999355	no	0.21125
ENSMUSG00000012428	Steap4	chr5:7960471-7982213	NOTEST	0.00486087	0	#NAME?	0	1	1	no	#NAME?
ENSMUSG00000012429	2810021B07Rik	chr13:17787246-17790939	OK	4.61927	6.42637	0.476341	1.25983	0.0828	0.687083	no	-0.476341
ENSMUSG00000012443	Kif11	chr19:37450892-37496349	NOTEST	1.38132	1.35481	-0.0279546	0	1	1	no	0.0279546
ENSMUSG00000012483	Rpa3	chr6:8205935-8209173	OK	4.41461	5.16559	0.226647	0.507973	0.4679	0.999355	no	-0.226647
ENSMUSG00000012519	Mlkl	chr8:113835696-113862077	OK	5.92172	3.28101	-0.851878	-2.18719	0.0018	0.0501055	no	0.851878
ENSMUSG00000012520	Phox2b	chr5:67485635-67490540	NOTEST	0	0	0	0	1	1	no	0
ENSMUSG00000012535	Tnpo3	chr6:29476624-29559887	OK	12.2409	15.3954	0.330798	0.787101	0.20275	0.969475	no	-0.330798
ENSMUSG00000012609	Ttll5	chr12:87165608-87419991	NOTEST	1.90117	2.26322	0.251491	0	1	1	no	-0.251491
ENSMUSG00000012640	Zfp715	chr7:50551566-50568664	OK	4.91243	6.15152	0.324508	1.05937	0.11955	0.799683	no	-0.324508
ENSMUSG00000012705	Retn	chr8:3655769-3660110	NOTEST	0	0	0	0	1	1	no	0
ENSMUSG00000012777	Acpt	chr7:51502091-51518090	NOTEST	0	0	0	0	1	1	no	0
ENSMUSG00000012819	Cdh23	chr10:59765495-60159238	NOTEST	0.0640099	0.106145	0.729668	0	1	1	no	-0.729668
ENSMUSG00000012848	Rps5	chr7:13507638-13512035	OK	84.7873	115	0.439713	1.63524	0.01995	0.293687	no	-0.439713
ENSMUSG00000012889	Podnl1	chr8:86649887-86656426	NOTEST	0.0834929	0.0811636	-0.0408215	0	1	1	no	0.0408215
ENSMUSG00000013033	Lphn1	chr8:86424003-86479104	NOTEST	0.215543	0.286966	0.412905	0	1	1	no	-0.412905
ENSMUSG00000013076	Amotl1	chr9:14346409-14447973	NOTEST	0.0173487	0.0163148	-0.0886463	0	1	1	no	0.0886463
ENSMUSG00000013083	2200002J24Rik	chr7:31484801-31485399	NOTEST	0.700073	1.75164	1.32313	0	1	1	no	-1.32313
ENSMUSG00000013089	Etv5	chr16:22381381-22439792	NOTEST	0.0769196	0.142387	0.888395	0	1	1	no	-0.888395
ENSMUSG00000013091	Tmem190	chr7:4734541-4735943	NOTEST	0.451629	0.870857	0.947297	0	1	1	no	-0.947297
ENSMUSG00000013150	Gfod2	chr8:108237753-108282564	OK	2.76592	5.02805	0.862239	2.05123	0.00375	0.0890116	no	-0.862239
ENSMUSG00000013155	E130303B06Rik	chr8:108227554-108231833	NOTEST	0.276016	0.469964	0.767799	0	1	1	no	-0.767799
ENSMUSG00000013158	4933405L10Rik	chr8:108232202-108234068	NOTEST	0.0104871	0.0439655	2.06776	0	1	1	no	-2.06776
ENSMUSG00000013160	Atp6v0d1	chr8:108048364-108089947	OK	32.8802	30.8644	-0.0912753	-0.328755	0.6295	0.999355	no	0.0912753
ENSMUSG00000013236	Ptprs	chr17:56551850-56615906	NOTEST	0.473844	0.498322	0.0726648	0	1	1	no	-0.0726648
ENSMUSG00000013275	Slc41a1	chr1:133724069-133745442	NOTEST	0.466168	0.335421	-0.474876	0	1	1	no	0.474876
ENSMUSG00000013338	Fer1l4	chr2:155844874-155878683	NOTEST	0.116251	0.325194	1.48405	0	1	1	no	-1.48405
ENSMUSG00000013353	4931406B18Rik	chr7:50747413-50761310	NOTEST	0	0.0101154	inf	0	1	1	no	#VALUE!
ENSMUSG00000013367	Iglon5	chr7:50728276-50745445	NOTEST	0.00447119	0.00400189	-0.159978	0	1	1	no	0.159978
ENSMUSG00000013415	Igf2bp1	chr11:95818476-95867254	NOTEST	0.00147943	0.00257893	0.801732	0	1	1	no	-0.801732
ENSMUSG00000013418	B4galnt2	chr11:95727256-95776205	OK	347.975	256.714	-0.438824	-1.62877	0.0183	0.28111	no	0.438824
ENSMUSG00000013419	Zfp651	chr9:121669150-121680860	NOTEST	0.0509556	0.0828376	0.701044	0	1	1	no	-0.701044
ENSMUSG00000013465	Cobra1	chr2:25055231-25067009	OK	19.623	20.1736	0.0399239	0.131576	0.84955	0.999355	no	-0.0399239
ENSMUSG00000013483	Card14	chr11:119169081-119216850	OK	3.00293	1.6222	-0.88842	-2.00818	0.0054	0.118388	no	0.88842
ENSMUSG00000013495	Tmem175	chr5:109058788-109113576	OK	9.25599	7.71861	-0.262047	-0.292108	0.6899	0.999355	no	0.262047
ENSMUSG00000013523	Bcas1	chr2:170172490-170253345	OK	8.65177	7.65505	-0.176584	-0.527894	0.42215	0.999355	no	0.176584
ENSMUSG00000013539	D16H22S680E	chr16:18300917-18348196	OK	29.3877	32.6701	0.15276	0.495182	0.46855	0.999355	no	-0.15276
ENSMUSG00000013562	4833413E03Rik	chr17:31694070-31696058	NOTEST	0.0265699	0.0313041	0.236559	0	1	1	no	-0.236559
ENSMUSG00000013584	Aldh1a2	chr9:71063595-71144050	NOTEST	0.0763836	0.0560407	-0.446787	0	1	1	no	0.446787
ENSMUSG00000013593	Ndufs2	chr1:173164983-173177253	OK	91.6169	88.9786	-0.0421543	-0.150607	0.82755	0.999355	no	0.0421543
ENSMUSG00000013611	Snx31	chr15:36433816-36485328	NOTEST	0	0.0108449	inf	0	1	1	no	#VALUE!
ENSMUSG00000013622	0610007C21Rik	chr5:31338408-31357006	OK	32.8062	32.8992	0.00408412	0.0103116	0.98845	0.999355	no	-0.00408412
ENSMUSG00000013629	Cad	chr5:31357152-31380852	NOTEST	0.609823	0.688143	0.174319	0	1	1	no	-0.174319
ENSMUSG00000013646	Sh3bp5l	chr11:58144225-58161230	OK	5.47944	4.71691	-0.216185	-0.564689	0.3822	0.999355	no	0.216185
ENSMUSG00000013653	1810065E05Rik	chr11:58234612-58239526	NOTEST	1.86254	0.575298	-1.69489	0	1	1	no	1.69489
ENSMUSG00000013662	Atad1	chr19:32747049-32786812	OK	54.6402	46.9877	-0.217682	-0.837083	0.24355	0.999355	no	0.217682
ENSMUSG00000013663	Pten	chr19:32831986-32900650	OK	20.5625	21.0273	0.0322474	0.0753042	0.9116	0.999355	no	-0.0322474
ENSMUSG00000013668	4933402N03Rik	chr7:137305964-140316037	NOTEST	0	0	0	0	1	1	no	0
ENSMUSG00000013698	Pea15a	chr1:174126858-174136935	NOTEST	1.28953	1.74914	0.439808	0	1	1	no	-0.439808
ENSMUSG00000013701	Timm23	chr14:32993347-33015084	NOTEST	2.32384	1.83573	-0.340162	0	1	1	no	0.340162
ENSMUSG00000013707	Tnfaip8l2	chr3:94943442-94946282	OK	4.6785	6.69216	0.516426	1.50998	0.03705	0.444891	no	-0.516426
ENSMUSG00000013736	Trnt1	chr6:106719113-106750068	OK	18.8165	17.0047	-0.146065	-0.264735	0.6937	0.999355	no	0.146065
ENSMUSG00000013766	Ly6g6e	chr17:35208387-35215749	NOTEST	0.0396298	0.253304	2.67621	0	1	1	no	-2.67621
ENSMUSG00000013787	Ehmt2	chr17:35035413-35050997	OK	21.0602	21.2176	0.0107459	0.0326918	0.9602	0.999355	no	-0.0107459
ENSMUSG00000013822	Elof1	chr9:21917432-21921592	OK	14.4754	18.4498	0.350003	1.18136	0.10095	0.749423	no	-0.350003
ENSMUSG00000013833	Med16	chr10:79357451-79371683	OK	4.20139	3.70314	-0.18212	-0.560964	0.4306	0.999355	no	0.18212
ENSMUSG00000013846	St3gal1	chr15:66934436-66945922	OK	5.87557	7.87477	0.42251	1.56913	0.03065	0.396551	no	-0.42251
ENSMUSG00000013858	ORF61	chr10:79433459-79447075	OK	46.4496	49.1622	0.0818846	0.298434	0.6797	0.999355	no	-0.0818846
ENSMUSG00000013878	Rnf170	chr8:27229839-27254343	OK	6.27985	5.60923	-0.162926	-0.454861	0.49855	0.999355	no	0.162926
ENSMUSG00000013921	Clip3	chr7:31076690-31093386	NOTEST	0.0204819	0.021471	0.0680349	0	1	1	no	-0.0680349
ENSMUSG00000013928	Thap8	chr7:31025156-31075256	NOTEST	0	0.0215827	inf	0	1	1	no	#VALUE!
ENSMUSG00000013936	Myl2	chr5:122550959-122588966	NOTEST	0	0	0	0	1	1	no	0
ENSMUSG00000013973	Dedd	chr1:173259275-173275777	OK	16.1612	18.5953	0.202407	0.370586	0.56965	0.999355	no	-0.202407
ENSMUSG00000013974	1810033B17Rik	chr8:3665761-3668905	NOTEST	0	0.0285316	inf	0	1	1	no	#VALUE!
ENSMUSG00000013989	D430018E03Rik	chr5:143628624-143657100	NOTEST	0.172234	0.172126	-0.000900303	0	1	1	no	0.000900303
ENSMUSG00000013997	Nit1	chr1:173259275-173275777	OK	29.041	27.4211	-0.0828058	-0.212685	0.75445	0.999355	no	0.0828058
ENSMUSG00000014030	Pax5	chr4:44544016-44724318	NOTEST	0.432433	0.442461	0.0330752	0	1	1	no	-0.0330752
ENSMUSG00000014039	Prdm15	chr16:98013073-98073457	OK	2.70083	3.43505	0.346931	0.770797	0.16895	0.926812	no	-0.346931
ENSMUSG00000014074	Rnf168	chr16:32277544-32301520	OK	4.5607	5.09512	0.159862	0.549483	0.4289	0.999355	no	-0.159862
ENSMUSG00000014075	Tctex1d2	chr16:32419787-32429185	NOTEST	1.79635	1.02865	-0.804316	0	1	1	no	0.804316
ENSMUSG00000014077	1500003O03Rik	chr2:119373432-119412763	OK	69.8443	69.822	-0.000460859	-0.00174558	0.99805	0.999355	no	0.000460859
ENSMUSG00000014104	Sval2	chr6:41802987-41814412	NOTEST	0	0.0290301	inf	0	1	1	no	#VALUE!
ENSMUSG00000014158	Trpv4	chr5:115072160-115108430	NOTEST	0.118843	0.0832266	-0.513942	0	1	1	no	0.513942
ENSMUSG00000014164	Klhl3	chr13:58024532-58214953	NOTEST	0.020745	0.0398054	0.940202	0	1	1	no	-0.940202
ENSMUSG00000014177	Fam18b	chr11:62692956-62730282	OK	26.4738	22.5944	-0.228603	-0.840871	0.228	0.999355	no	0.228603
ENSMUSG00000014195	Dnajc7	chr11:100436217-100565585	OK	135.513	147.161	0.118958	0.31237	0.6605	0.999355	no	-0.118958
ENSMUSG00000014198	Zfp385c	chr11:100436217-100565585	NOTEST	0.0816	0.0274704	-1.57069	0	1	1	no	1.57069
ENSMUSG00000014226	Cacybp	chr1:162133055-162142908	OK	12.588	14.7266	0.226381	0.773452	0.27385	0.999355	no	-0.226381
ENSMUSG00000014232	Cluap1	chr16:3847267-3941147	NOTEST	2.40588	2.34839	-0.0348891	0	1	1	no	0.0348891
ENSMUSG00000014243	Zswim7	chr11:62080725-62094877	OK	5.56904	5.15058	-0.112694	-0.284883	0.68245	0.999355	no	0.112694
ENSMUSG00000014245	Pigl	chr11:62094974-62329795	OK	9.25829	10.3071	0.154821	0.106166	0.8721	0.999355	no	-0.154821
ENSMUSG00000014294	Ndufa2	chr18:36894721-36904202	OK	51.6391	56.7611	0.136441	0.455852	0.52245	0.999355	no	-0.136441
ENSMUSG00000014301	Pam16	chr16:4594712-4624988	NOTEST	0.50732	0.712306	0.489601	0	1	1	no	-0.489601
ENSMUSG00000014303	Glis2	chr16:4594712-4624988	NOTEST	0.477066	0.643649	0.432085	0	1	1	no	-0.432085
ENSMUSG00000014313	Cox6c	chr15:35301300-35868001	OK	165.014	176.822	0.0997077	0.237515	0.7345	0.999355	no	-0.0997077
ENSMUSG00000014329	Bicc1	chr10:70331416-70622448	NOTEST	0.00875411	0.0196482	1.16637	0	1	1	no	-1.16637
ENSMUSG00000014349	Ube2z	chr11:95908745-95926702	OK	21.4483	20.5001	-0.0652325	-0.246768	0.72965	0.999355	no	0.0652325
ENSMUSG00000014351	Gip	chr11:95885858-95892145	OK	90.6375	83.5495	-0.117477	-0.445948	0.5367	0.999355	no	0.117477
ENSMUSG00000014353	Tmem87b	chr2:128643853-128679997	OK	42.4336	38.3973	-0.144203	-0.353847	0.57765	0.999355	no	0.144203
ENSMUSG00000014355	Anapc1	chr2:128435839-128513127	OK	19.5222	17.2961	-0.174668	-0.327234	0.6231	0.999355	no	0.174668
ENSMUSG00000014361	Mertk	chr2:128524691-128628630	OK	57.5643	64.0267	0.153501	0.56277	0.42365	0.999355	no	-0.153501
ENSMUSG00000014372	Cyp2d10	chr15:82233275-82237624	NOTEST	0.0306785	0.0250699	-0.291274	0	1	1	no	0.291274
ENSMUSG00000014402	Tsg101	chr7:54144318-54175339	OK	21.5645	21.8213	0.0170791	0.0593087	0.9338	0.999355	no	-0.0170791
ENSMUSG00000014418	Hps5	chr7:54015835-54051434	OK	31.9021	30.9499	-0.0437164	-0.106711	0.8607	0.999355	no	0.0437164
ENSMUSG00000014426	Map3k4	chr17:12420488-12511614	OK	6.82964	6.52514	-0.0658009	-0.241354	0.7319	0.999355	no	0.0658009
ENSMUSG00000014444	Fam38a	chr8:122434259-126869624	NOTEST	0.449154	0.449987	0.00267241	0	1	1	no	-0.00267241
ENSMUSG00000014453	Blk	chr14:63991673-64036024	NOTEST	0.26014	0.246802	-0.0759326	0	1	1	no	0.0759326
ENSMUSG00000014470	Rnf166	chr8:122434259-126869624	OK	5.10504	5.75909	0.173919	0.0333232	0.9263	0.999355	no	-0.173919
ENSMUSG00000014496	Ankrd28	chr14:32513200-32643601	OK	8.97403	6.97109	-0.364371	-1.32876	0.06135	0.593222	no	0.364371
ENSMUSG00000014498	Ankrd52	chr10:127814170-127848548	OK	5.95378	5.47245	-0.12162	-0.196643	0.78255	0.999355	no	0.12162
ENSMUSG00000014503	Pkd2l2	chr18:34569076-34666477	OK	3.90744	4.66865	0.256781	0.233642	0.7382	0.999355	no	-0.256781
ENSMUSG00000014504	Srp19	chr18:34490500-34496253	OK	14.1897	14.5616	0.0373294	0.10488	0.88485	0.999355	no	-0.0373294
ENSMUSG00000014529	4930511M11Rik	chr5:3657003-3680325	NOTEST	0	0	0	0	1	1	no	0
ENSMUSG00000014542	Clec4f	chr6:83594535-83606181	NOTEST	0.0927536	0.110673	0.254834	0	1	1	no	-0.254834
ENSMUSG00000014543	Klra17	chr6:129781171-129826690	NOTEST	0.0720023	0.0954307	0.406409	0	1	1	no	-0.406409
ENSMUSG00000014547	Wdfy2	chr14:63455744-63575723	NOTEST	1.40275	1.56805	0.160718	0	1	1	no	-0.160718
ENSMUSG00000014550	Zfyve20	chr6:92136705-92164919	OK	7.25552	7.28286	0.00542668	0.019747	0.9776	0.999355	no	-0.00542668
ENSMUSG00000014551	Mrps25	chr6:92041383-92134027	OK	9.03401	10.8899	0.269547	0.260339	0.70865	0.999355	no	-0.269547
ENSMUSG00000014554	Dguok	chr6:83430210-83456963	OK	5.52121	6.71787	0.283021	0.671943	0.35055	0.999355	no	-0.283021
ENSMUSG00000014592	Camta1	chr4:150433632-151235985	OK	2.70425	2.62233	-0.0443838	-0.0730988	0.91675	0.999355	no	0.0443838
ENSMUSG00000014599	Csf1	chr3:107543965-107563387	NOTEST	0.219791	0.136181	-0.690603	0	1	1	no	0.690603
ENSMUSG00000014601	Fam40a	chr3:107415449-107436008	OK	9.73393	9.04925	-0.105224	-0.384137	0.5847	0.999355	no	0.105224
ENSMUSG00000014602	Kif1a	chr1:94912032-94998442	NOTEST	0.0697259	0.0837552	0.264485	0	1	1	no	-0.264485
ENSMUSG00000014603	Alx3	chr3:107397948-107408792	NOTEST	0	0	0	0	1	1	no	0
ENSMUSG00000014606	Slc25a11	chr11:70457697-70464923	OK	61.0422	54.307	-0.16867	-0.383352	0.577	0.999355	no	0.16867
ENSMUSG00000014609	Chrne	chr11:70428384-70432718	NOTEST	0.106724	0.179176	0.747495	0	1	1	no	-0.747495
ENSMUSG00000014633	2310061C15Rik	chr8:119412584-119445355	OK	4.47073	3.75522	-0.251614	-0.485647	0.4837	0.999355	no	0.251614
ENSMUSG00000014668	Chfr	chr5:110564858-110605523	OK	16.6505	17.1517	0.0427892	0.156183	0.82525	0.999355	no	-0.0427892
ENSMUSG00000014686	Ceacam16	chr7:20437351-20446648	NOTEST	0.0100732	0.0675581	2.74561	0	1	1	no	-2.74561
ENSMUSG00000014704	Hoxa2	chr6:52112349-52171853	NOTEST	0.0139698	0.0410382	1.55466	0	1	1	no	-1.55466
ENSMUSG00000014725	Adam28	chr14:69224083-69273899	NOTEST	0	0	0	0	1	1	no	0
ENSMUSG00000014747	Ankrd53	chr6:83712637-83718320	NOTEST	0.175766	0.173573	-0.0181166	0	1	1	no	0.0181166
ENSMUSG00000014748	Tex261	chr6:83718874-83725806	OK	39.5801	42.4225	0.100052	0.358563	0.57725	0.999355	no	-0.100052
ENSMUSG00000014763	Fam120b	chr17:15533209-15570544	OK	10.2527	10.236	-0.00234145	-0.00861175	0.9911	0.999355	no	0.00234145
ENSMUSG00000014767	Tbp	chr17:15636851-15665343	OK	10.1186	11.2638	0.154672	0.313185	0.64585	0.999355	no	-0.154672
ENSMUSG00000014769	Psmb1	chr17:15612684-15635240	OK	44.6485	47.23	0.0810923	0.298175	0.66795	0.999355	no	-0.0810923
ENSMUSG00000014771	Pdcd2	chr17:15636851-15665343	OK	6.4576	9.0978	0.494519	0.724881	0.30085	0.999355	no	-0.494519
ENSMUSG00000014773	Dll1	chr17:15504317-15516439	OK	17.9714	18.1863	0.0171468	0.0458225	0.9484	0.999355	no	-0.0171468
ENSMUSG00000014776	Nol3	chr8:107800346-107813428	NOTEST	0.0556044	0.0278671	-0.996636	0	1	1	no	0.996636
ENSMUSG00000014778	Fhod1	chr8:107850261-107871853	OK	4.08956	4.21634	0.0440453	0.0676676	0.9073	0.999355	no	-0.0440453
ENSMUSG00000014782	Plekhg4	chr8:107897173-107937402	NOTEST	0.0492143	0.0831144	0.756021	0	1	1	no	-0.756021
ENSMUSG00000014786	Slc9a5	chr8:107872157-107893781	NOTEST	0.275966	0.260013	-0.0859069	0	1	1	no	0.0859069
ENSMUSG00000014791	Elmo3	chr8:107829500-107835300	OK	23.8723	21.0104	-0.184239	-0.656624	0.34685	0.999355	no	0.184239
ENSMUSG00000014813	Stc1	chr14:69647294-69659861	NOTEST	0.00449973	0	#NAME?	0	1	1	no	#NAME?
ENSMUSG00000014837	4931428F04Rik	chr8:107800346-107813428	NOTEST	0.178489	0.184535	0.0480652	0	1	1	no	-0.0480652
ENSMUSG00000014846	Tppp3	chr8:107991392-107995426	OK	5.20266	5.34708	0.0395005	0.105304	0.8832	0.999355	no	-0.0395005
ENSMUSG00000014850	Msh3	chr13:92981835-93159008	OK	3.22601	4.48066	0.473963	0.709887	0.30755	0.999355	no	-0.473963
ENSMUSG00000014852	Adamts13	chr2:26828935-26865148	NOTEST	0.0516389	0.0132894	-1.95818	0	1	1	no	1.95818
ENSMUSG00000014856	Tmem208	chr8:107850261-107871853	OK	34.2311	34.1285	-0.00433079	-0.0124317	0.9856	0.999355	no	0.00433079
ENSMUSG00000014859	E2f4	chr8:107821562-107829269	OK	12.8643	14.3408	0.156755	0.570431	0.43035	0.999355	no	-0.156755
ENSMUSG00000014867	Surf4	chr2:26768902-26789448	OK	208.963	187.22	-0.158517	-0.574322	0.41635	0.999355	no	0.158517
ENSMUSG00000014873	Surf2	chr2:26768902-26789448	OK	3.48555	4.08881	0.230293	0.060187	0.80885	0.999355	no	-0.230293
ENSMUSG00000014905	Dnajb9	chr12:45306883-45311055	OK	56.427	64.4918	0.192729	0.729037	0.3069	0.999355	no	-0.192729
ENSMUSG00000014907	Naf1	chr8:69384115-69414463	NOTEST	0.47997	0.522067	0.12129	0	1	1	no	-0.12129
ENSMUSG00000014932	Yes1	chr5:32761346-32989430	OK	36.0206	32.937	-0.129111	-0.294507	0.67305	0.999355	no	0.129111
ENSMUSG00000014956	Ppp1cb	chr5:32761346-32989430	OK	58.6824	52.0357	-0.173427	-0.302455	0.6474	0.999355	no	0.173427
ENSMUSG00000014959	Gorasp2	chr2:70499632-70663785	OK	54.7572	52.3728	-0.0642304	-0.190707	0.78535	0.999355	no	0.0642304
ENSMUSG00000014980	Tsen15	chr1:154217864-154233818	NOTEST	0.539226	0.715449	0.407957	0	1	1	no	-0.407957
ENSMUSG00000015001	Oc90	chr15:65707614-65743959	NOTEST	0.0358865	0.0136235	-1.39735	0	1	1	no	1.39735
ENSMUSG00000015002	Efr3a	chr15:65618595-65705378	OK	27.9418	25.0779	-0.156009	-0.479889	0.41645	0.999355	no	0.156009
ENSMUSG00000015013	Trappc2l	chr8:122434259-126869624	OK	32.3194	24.0793	-0.424606	-0.108342	0.85005	0.999355	no	0.424606
ENSMUSG00000015016	Acsf3	chr8:122434259-126869624	OK	11.665	10.9154	-0.095831	-0.032929	0.96495	0.999355	no	0.095831
ENSMUSG00000015023	Ddx19a	chr8:113498895-113521700	OK	4.05324	3.62749	-0.160104	-0.387701	0.56545	0.999355	no	0.160104
ENSMUSG00000015027	Galns	chr8:122434259-126869624	OK	10.906	7.63902	-0.513662	-0.156201	0.82445	0.999355	no	0.513662
ENSMUSG00000015053	Gata2	chr6:88143884-88157024	NOTEST	0.0148834	0.0233532	0.649917	0	1	1	no	-0.649917
ENSMUSG00000015083	C8g	chr2:25354170-25360991	NOTEST	1.55343	1.72016	0.147088	0	1	1	no	-0.147088
ENSMUSG00000015085	Entpd2	chr2:25251393-25265014	OK	18.9447	16.9759	-0.158308	-0.417483	0.5552	0.999355	no	0.158308
ENSMUSG00000015087	B230208H17Rik	chr2:25438537-25487281	OK	11.3034	15.0439	0.412431	0.994319	0.1176	0.797589	no	-0.412431
ENSMUSG00000015090	Ptgds	chr2:25322228-25325566	NOTEST	0	0.00743788	inf	0	1	1	no	#VALUE!
ENSMUSG00000015092	Edf1	chr2:25413366-25417602	OK	162.434	182.146	0.165244	0.64677	0.3722	0.999355	no	-0.165244
ENSMUSG00000015093	Clic3	chr2:25310660-25316614	NOTEST	1.40305	1.55902	0.152077	0	1	1	no	-0.152077
ENSMUSG00000015094	Npdc1	chr2:25251393-25265014	OK	32.6078	25.0022	-0.383162	-0.930206	0.20005	0.969475	no	0.383162
ENSMUSG00000015095	Fbxw5	chr2:25354170-25360991	OK	13.9144	13.2951	-0.0656888	-0.204249	0.77245	0.999355	no	0.0656888
ENSMUSG00000015112	Slc25a13	chr6:5991218-6167173	OK	13.4505	11.1516	-0.270407	-0.977243	0.15975	0.909209	no	0.270407
ENSMUSG00000015120	Ube2i	chr17:25398860-25411567	OK	15.0762	17.3657	0.203963	0.547428	0.4324	0.999355	no	-0.203963
ENSMUSG00000015126	0610007P22Rik	chr17:25377114-25393309	OK	2.95118	2.90534	-0.0225819	-0.0390054	0.9558	0.999355	no	0.0225819
ENSMUSG00000015127	Unkl	chr17:25325341-25377061	NOTEST	2.37964	1.46975	-0.695176	0	1	1	no	0.695176
ENSMUSG00000015133	Lrrk1	chr7:73371797-73533236	OK	3.33859	2.69702	-0.307871	-0.655075	0.29755	0.999355	no	0.307871
ENSMUSG00000015134	Aldh1a3	chr7:73535777-73572403	NOTEST	0.202154	0.111858	-0.853781	0	1	1	no	0.853781
ENSMUSG00000015143	Actn1	chr12:81268528-81361358	OK	3.46478	3.08853	-0.165845	-0.536476	0.4445	0.999355	no	0.165845
ENSMUSG00000015149	Sirt2	chr7:29543269-29573684	OK	21.2766	23.2392	0.127292	0.339313	0.61325	0.999355	no	-0.127292
ENSMUSG00000015165	Hnrnpl	chr7:29593559-29607285	OK	103.804	111.302	0.100615	0.315144	0.65665	0.999355	no	-0.100615
ENSMUSG00000015176	Nolc1	chr19:46150352-46160018	NOTEST	2.4599	2.5333	0.0424146	0	1	1	no	-0.0424146
ENSMUSG00000015189	Casd1	chr6:4550839-4593381	NOTEST	2.04242	1.51207	-0.433751	0	1	1	no	0.433751
ENSMUSG00000015202	Cnksr3	chr10:3134303-3227478	OK	6.5104	8.41133	0.369588	1.29892	0.0646	0.609882	no	-0.369588
ENSMUSG00000015214	Mtmr1	chrX:68617934-68672371	OK	9.31167	9.34627	0.00535173	0.0141502	0.97675	0.999355	no	-0.00535173
ENSMUSG00000015217	Hmgb3	chrX:68809092-68813851	OK	3.23976	2.52483	-0.359698	-0.810454	0.2495	0.999355	no	0.359698
ENSMUSG00000015222	Mtap2	chr1:66221846-66489157	NOTEST	0.260954	0.266591	0.0308324	0	1	1	no	-0.0308324
ENSMUSG00000015224	Cyp2j9	chr4:96235119-96258269	OK	2.8717	3.92743	0.451679	1.27071	0.0709	0.634612	no	-0.451679
ENSMUSG00000015242	Nipsnap3a	chr4:53002143-53014034	NOTEST	0	0	0	0	1	1	no	0
ENSMUSG00000015247	Nipsnap3b	chr4:53024751-53034932	OK	60.7987	61.563	0.0180236	0.0665685	0.92485	0.999355	no	-0.0180236
ENSMUSG00000015289	Lage3	chrX:71596614-71598957	OK	2.44522	3.18398	0.380866	0.821708	0.2465	0.999355	no	-0.380866
ENSMUSG00000015290	Ubl4	chrX:71611056-71614012	OK	12.3275	12.8013	0.0544103	0.163392	0.81595	0.999355	no	-0.0544103
ENSMUSG00000015291	Gdi1	chrX:71550336-71557201	OK	35.0647	32.1628	-0.124626	-0.330259	0.62785	0.999355	no	0.124626
ENSMUSG00000015305	Sash1	chr10:8442016-8606678	OK	9.09737	9.021	-0.0121619	-0.0459862	0.9485	0.999355	no	0.0121619
ENSMUSG00000015312	Gadd45b	chr10:80392835-80394949	OK	5.81157	7.54841	0.377246	1.18409	0.09495	0.727832	no	-0.377246
ENSMUSG00000015314	Slamf6	chr1:173847645-173879083	NOTEST	0.253069	0.258006	0.0278723	0	1	1	no	-0.0278723
ENSMUSG00000015316	Slamf1	chr1:173697257-173731315	NOTEST	0.0834244	0.0843534	0.0159779	0	1	1	no	-0.0159779
ENSMUSG00000015335	Zdhhc12	chr2:29933203-29949168	OK	16.461	17.9511	0.125017	0.42838	0.55935	0.999355	no	-0.125017
ENSMUSG00000015337	Endog	chr2:30027012-30033979	OK	7.74075	7.82309	0.0152658	0.0384633	0.9577	0.999355	no	-0.0152658
ENSMUSG00000015340	Cybb	chrX:9012377-9064897	NOTEST	0.675848	0.568941	-0.24842	0	1	1	no	0.24842
ENSMUSG00000015341	Golga7	chr8:24351824-24367546	OK	11.8145	15.375	0.380026	1.22946	0.0797	0.672321	no	-0.380026
ENSMUSG00000015342	Xk	chrX:8849881-8890376	OK	22.383	16.2336	-0.463418	-1.7408	0.0131	0.222023	no	0.463418
ENSMUSG00000015354	Pcolce2	chr9:95519329-95598515	NOTEST	0.0141848	0.00805282	-0.816774	0	1	1	no	0.816774
ENSMUSG00000015355	Cd48	chr1:173612139-173635389	OK	3.04473	2.68909	-0.179195	-0.418877	0.55475	0.999355	no	0.179195
ENSMUSG00000015357	Clpx	chr9:65142066-65178465	OK	17.4397	16.177	-0.108429	-0.353098	0.6022	0.999355	no	0.108429
ENSMUSG00000015363	Trabd	chr15:88890155-88917507	OK	20.282	25.1164	0.308427	1.11294	0.107	0.769696	no	-0.308427
ENSMUSG00000015365	Mov10l1	chr15:88813338-88885582	NOTEST	0	0.0124301	inf	0	1	1	no	#VALUE!
ENSMUSG00000015377	Fam116b	chr15:89012646-89026905	NOTEST	0.695501	0.988656	0.507417	0	1	1	no	-0.507417
ENSMUSG00000015401	Tmem27	chrX:160526761-160556792	NOTEST	0.292457	0.233093	-0.327323	0	1	1	no	0.327323
ENSMUSG00000015405	Ace2	chrX:160577263-160626352	OK	1260.29	1203.54	-0.0664701	-0.211365	0.75885	0.999355	no	0.0664701
ENSMUSG00000015437	Gzmb	chr14:56877692-56881097	OK	39.8512	37.9295	-0.0713016	-0.265907	0.71	0.999355	no	0.0713016
ENSMUSG00000015441	Gzmf	chr14:56824102-56830244	NOTEST	0	0	0	0	1	1	no	0
ENSMUSG00000015443	Gzmn	chr14:56784633-56793436	NOTEST	0	0	0	0	1	1	no	0
ENSMUSG00000015451	C4a	chr17:34946036-34960409	NOTEST	0.0628245	0.111825	0.831846	0	1	1	no	-0.831846
ENSMUSG00000015452	Ager	chr17:34734806-34737879	NOTEST	0.343818	0.485776	0.498649	0	1	1	no	-0.498649
ENSMUSG00000015461	Atf6b	chr17:34784090-34792019	OK	9.53068	9.06187	-0.0727704	-0.251048	0.70535	0.999355	no	0.0727704
ENSMUSG00000015467	Egfl8	chr17:34741206-34765455	NOTEST	0.209043	0.306789	0.553445	0	1	1	no	-0.553445
ENSMUSG00000015468	Notch4	chr17:34701212-34725448	NOTEST	0.503472	0.319418	-0.656465	0	1	1	no	0.656465
ENSMUSG00000015474	Ppt2	chr17:34741206-34765455	OK	5.54606	4.47361	-0.310025	-0.267542	0.7179	0.999355	no	0.310025
ENSMUSG00000015476	Prrt1	chr17:34766477-34770071	NOTEST	0.935519	1.5926	0.767548	0	1	1	no	-0.767548
ENSMUSG00000015478	Rnf5	chr17:34738035-34740635	OK	29.1837	29.9838	0.0390203	0.128737	0.8614	0.999355	no	-0.0390203
ENSMUSG00000015484	Fam163a	chr1:157923095-158135156	NOTEST	0.00698743	0.0112892	0.692104	0	1	1	no	-0.692104
ENSMUSG00000015488	5930434B04Rik	chr2:26865445-26876609	OK	16.4156	16.7676	0.0306088	0.10461	0.87575	0.999355	no	-0.0306088
ENSMUSG00000015501	Hivep2	chr10:13686184-13871182	OK	4.06097	3.84961	-0.0771128	-0.280564	0.6891	0.999355	no	0.0771128
ENSMUSG00000015519	2310057J18Rik	chr10:28692093-28706109	NOTEST	0	0	0	0	1	1	no	0
ENSMUSG00000015522	Arnt	chr3:95238309-95301162	OK	14.3368	13.0504	-0.135624	-0.418174	0.49095	0.999355	no	0.135624
ENSMUSG00000015533	Itga2	chr13:115626123-115722249	OK	3.51278	2.28357	-0.621322	-1.96564	0.0061	0.130617	no	0.621322
ENSMUSG00000015536	Mocs2	chr13:115608451-115619214	OK	180.575	189.569	0.0701212	0.248043	0.7261	0.999355	no	-0.0701212
ENSMUSG00000015542	Nat9	chr11:115044145-115108337	OK	12.6427	11.1977	-0.175112	-0.364676	0.60565	0.999355	no	0.175112
ENSMUSG00000015568	Lpl	chr8:71404389-71431347	NOTEST	0.0332764	0.0339031	0.0269157	0	1	1	no	-0.0269157
ENSMUSG00000015575	Atp6v0e	chr17:26813340-26836589	OK	97.1714	113.916	0.229371	0.862127	0.2271	0.999355	no	-0.229371
ENSMUSG00000015579	Nkx2-5	chr17:26975608-26978510	NOTEST	0	0	0	0	1	1	no	0
ENSMUSG00000015597	Zfp318	chr17:46520679-46557869	OK	3.0094	2.31355	-0.379366	-0.592295	0.37105	0.999355	no	0.379366
ENSMUSG00000015599	Ttbk1	chr17:46579396-46968362	NOTEST	0.00348036	0.00425166	0.28879	0	1	1	no	-0.28879
ENSMUSG00000015605	Srf	chr17:46579396-46968362	OK	5.12643	5.0066	-0.0341234	-0.0256579	0.97255	0.999355	no	0.0341234
ENSMUSG00000015619	Gata3	chr2:9778704-9811661	NOTEST	0.112303	0.102271	-0.135004	0	1	1	no	0.135004
ENSMUSG00000015627	Gata5	chr2:180059837-180075437	OK	32.0506	35.2376	0.136763	0.520135	0.46235	0.999355	no	-0.136763
ENSMUSG00000015647	Lama5	chr2:179911077-179960564	NOTEST	0.26622	0.226289	-0.23445	0	1	1	no	0.23445
ENSMUSG00000015652	Steap1	chr5:5736316-5749326	NOTEST	0.331885	0.410098	0.305287	0	1	1	no	-0.305287
ENSMUSG00000015653	Steap2	chr5:5664830-5694578	NOTEST	0.685289	0.420059	-0.70612	0	1	1	no	0.70612
ENSMUSG00000015656	Hspa8	chr9:40609066-40613283	OK	115.844	161.516	0.479501	1.66503	0.01915	0.287438	no	-0.479501
ENSMUSG00000015659	Serac1	chr17:5941279-6079741	NOTEST	1.42532	1.23061	-0.211912	0	1	1	no	0.211912
ENSMUSG00000015665	Awat1	chrX:97767589-97773544	NOTEST	0	0	0	0	1	1	no	0
ENSMUSG00000015668	Pdzd11	chrX:97818221-97922553	OK	23.3893	22.3656	-0.0645627	-0.211425	0.7629	0.999355	no	0.0645627
ENSMUSG00000015671	Psma2	chr13:14705520-14719674	OK	15.9972	13.6194	-0.232159	-0.844204	0.2333	0.999355	no	0.232159
ENSMUSG00000015672	Mrpl32	chr13:14702567-14705304	OK	13.5311	14.6137	0.111047	0.345849	0.62275	0.999355	no	-0.111047
ENSMUSG00000015697	Setdb1	chr3:95111593-95161124	OK	4.27393	4.77361	0.159517	0.189085	0.7696	0.999355	no	-0.159517
ENSMUSG00000015702	Anxa9	chr3:95057595-95111098	NOTEST	0.206168	0.314069	0.607262	0	1	1	no	-0.607262
ENSMUSG00000015709	Arnt2	chr7:91394790-91558469	NOTEST	0.903371	1.25016	0.468725	0	1	1	no	-0.468725
ENSMUSG00000015711	Prune	chr3:95057595-95111098	OK	6.90408	6.26666	-0.139753	-0.271604	0.68655	0.999355	no	0.139753
ENSMUSG00000015714	Lass2	chr3:95111593-95161124	OK	98.6998	105.269	0.0929572	0.316468	0.63435	0.999355	no	-0.0929572
ENSMUSG00000015721	Nlrp5	chr7:24170907-24226941	NOTEST	0	0	0	0	1	1	no	0
ENSMUSG00000015733	Capza2	chr6:17586233-17616972	OK	111.429	115.181	0.0477848	0.165597	0.8129	0.999355	no	-0.0477848
ENSMUSG00000015745	Plekho1	chr3:95792351-95799924	NOTEST	0.835409	1.14769	0.458179	0	1	1	no	-0.458179
ENSMUSG00000015747	Vps45	chr3:95803754-95862389	OK	6.46822	5.06465	-0.352906	-0.496737	0.45765	0.999355	no	0.352906
ENSMUSG00000015748	Prpf3	chr3:95634046-95659808	OK	10.9225	12.2067	0.160376	0.3901	0.5819	0.999355	no	-0.160376
ENSMUSG00000015749	Anp32e	chr3:95733168-95751313	OK	7.4556	6.34846	-0.231918	-0.521189	0.4608	0.999355	no	0.231918
ENSMUSG00000015750	Aph1a	chr3:95697891-95708614	OK	5.91735	5.73551	-0.0450309	-0.159842	0.8209	0.999355	no	0.0450309
ENSMUSG00000015755	Tab2	chr10:7625450-7676028	OK	26.96	24.7667	-0.122418	-0.322582	0.5912	0.999355	no	0.122418
ENSMUSG00000015757	Ppil4	chr10:7512688-7542933	OK	10.197	10.9021	0.0964586	0.333719	0.64025	0.999355	no	-0.0964586
ENSMUSG00000015759	Cnih	chr14:47395256-47408086	OK	42.8669	47.7305	0.155047	0.576876	0.4065	0.999355	no	-0.155047
ENSMUSG00000015766	Eps8	chr6:137425765-137603397	OK	144.202	108.388	-0.411885	-1.28851	0.05785	0.580142	no	0.411885
ENSMUSG00000015776	Med22	chr2:26760781-26766197	OK	4.92372	6.24535	0.343036	1.03883	0.1271	0.816533	no	-0.343036
ENSMUSG00000015787	Abo	chr2:26698022-26720499	NOTEST	0	0	0	0	1	1	no	0
ENSMUSG00000015790	Surf1	chr2:26768902-26789448	OK	26.8231	27.6888	0.0458286	0.0233305	0.95995	0.999355	no	-0.0458286
ENSMUSG00000015804	Med28	chr5:45911459-45920515	OK	40.1811	45.1683	0.168793	0.575433	0.4142	0.999355	no	-0.168793
ENSMUSG00000015806	Qdpr	chr5:45825270-45841474	OK	26.36	33.1559	0.330919	1.21266	0.0796	0.672321	no	-0.330919
ENSMUSG00000015812	Gnrh1	chr14:68363285-68367492	OK	1.38792	2.7891	1.00687	1.77393	0.01605	0.256856	no	-1.00687
ENSMUSG00000015829	Tnr	chr1:161667640-161855053	NOTEST	0.01186	0.0186487	0.652966	0	1	1	no	-0.652966
ENSMUSG00000015837	Sqstm1	chr11:49987945-50024329	OK	74.7629	76.6596	0.0361436	0.123321	0.8556	0.999355	no	-0.0361436
ENSMUSG00000015839	Nfe2l2	chr2:75513569-75542698	OK	132.593	117.855	-0.16999	-0.633211	0.3691	0.999355	no	0.16999
ENSMUSG00000015843	Rxrg	chr1:169528514-169569754	NOTEST	0	0	0	0	1	1	no	0
ENSMUSG00000015846	Rxra	chr2:27531959-27618477	OK	31.0678	28.74	-0.112362	-0.433496	0.5499	0.999355	no	0.112362
ENSMUSG00000015850	Adamtsl4	chr3:95480123-95491840	NOTEST	0.408492	0.53258	0.38269	0	1	1	no	-0.38269
ENSMUSG00000015852	Fcrls	chr3:87054679-87067660	NOTEST	0	0.00501378	inf	0	1	1	no	#VALUE!
ENSMUSG00000015854	Cd5l	chr3:87161802-87174996	NOTEST	0.00653432	0.019856	1.60347	0	1	1	no	-1.60347
ENSMUSG00000015869	Prpsap1	chr11:116327632-116355516	OK	98.4259	129.512	0.395978	1.32994	0.0546	0.563546	no	-0.395978
ENSMUSG00000015879	Fam184b	chr5:45920944-46036708	NOTEST	0.0289306	0.0864569	1.57938	0	1	1	no	-1.57938
ENSMUSG00000015880	Ncapg	chr5:46061160-46248854	NOTEST	2.16122	2.25626	0.0620858	0	1	1	no	-0.0620858
ENSMUSG00000015882	Lcorl	chr5:46061160-46248854	OK	23.0687	19.8002	-0.22042	-0.787166	0.25575	0.999355	no	0.22042
ENSMUSG00000015889	Lta4h	chr10:92916140-92947641	OK	112.356	108.02	-0.056777	-0.216304	0.7581	0.999355	no	0.056777
ENSMUSG00000015890	Amdhd1	chr10:92986082-93002778	NOTEST	0	0	0	0	1	1	no	0
ENSMUSG00000015932	Dstn	chr2:143741055-143769060	OK	663.175	606.309	-0.129335	-0.464596	0.5071	0.999355	no	0.129335
ENSMUSG00000015937	H2afy	chr13:56174979-56237722	OK	35.549	34.1705	-0.0570576	-0.179379	0.80095	0.999355	no	0.0570576
ENSMUSG00000015942	Gtf2ird2	chr5:134659888-134705495	NOTEST	1.00416	0.959229	-0.0660376	0	1	1	no	0.0660376
ENSMUSG00000015943	Bola1	chr3:96000510-96024231	OK	3.01833	3.13234	0.053489	0.120707	0.87045	0.999355	no	-0.053489
ENSMUSG00000015944	Gatsl2	chr5:134575580-134620213	OK	17.041	17.5592	0.0432139	0.147991	0.8229	0.999355	no	-0.0432139
ENSMUSG00000015947	Fcgr1	chr3:96086831-96098179	NOTEST	0.0771305	0.0307631	-1.3261	0	1	1	no	1.3261
ENSMUSG00000015950	Ncf1	chr5:134659888-134705495	NOTEST	1.72488	1.76538	0.0334859	0	1	1	no	-0.0334859
ENSMUSG00000015957	Wnt11	chr7:105983621-106003705	NOTEST	0.0722477	0.0218096	-1.72799	0	1	1	no	1.72799
ENSMUSG00000015961	Adss	chr1:179693092-179726642	OK	43.8001	49.287	0.170271	0.636142	0.3695	0.999355	no	-0.170271
ENSMUSG00000015962	1700016C15Rik	chr1:179659944-179683455	OK	3.83083	3.50521	-0.128156	-0.283314	0.6853	0.999355	no	0.128156
ENSMUSG00000015966	Il17rb	chr14:30809326-30822082	NOTEST	1.2145	1.72671	0.507664	0	1	1	no	-0.507664
ENSMUSG00000015968	Cacna1d	chr14:30822208-31340242	NOTEST	0.369422	0.370743	0.00515098	0	1	1	no	-0.00515098
ENSMUSG00000015970	Chdh	chr14:30822208-31340242	OK	55.6995	53.8736	-0.0480863	-0.146983	0.80055	0.999355	no	0.0480863
ENSMUSG00000015971	Actr8	chr14:30791522-30806407	OK	4.54676	3.85089	-0.239647	-0.744007	0.29545	0.999355	no	0.239647
ENSMUSG00000015980	Lrrc27	chr7:146289536-146428878	NOTEST	0.426586	0.391323	-0.124477	0	1	1	no	0.124477
ENSMUSG00000015981	Stk32c	chr7:146289536-146428878	NOTEST	0.6352	0.620217	-0.0344368	0	1	1	no	0.0344368
ENSMUSG00000015994	Fnta	chr8:27109200-27126073	OK	18.4683	19.2108	0.0568701	0.205871	0.77085	0.999355	no	-0.0568701
ENSMUSG00000016018	Skiv2l2	chr13:113591101-113717588	OK	8.69832	8.07362	-0.10752	-0.137961	0.84895	0.999355	no	0.10752
ENSMUSG00000016024	Lbp	chr2:158132228-158158588	NOTEST	0.350127	0.00931447	-5.23226	0	1	1	no	5.23226
ENSMUSG00000016028	Celsr1	chr15:85729187-85864207	NOTEST	0.139224	0.129814	-0.100963	0	1	1	no	0.100963
ENSMUSG00000016087	Fli1	chr9:32229792-32348974	NOTEST	0.674887	0.551403	-0.29154	0	1	1	no	0.29154
ENSMUSG00000016128	Stard13	chr5:151840202-152036411	NOTEST	2.03303	1.92736	-0.0770068	0	1	1	no	0.0770068
[truncated: 35,981 more rows]
