# Supplementary material for: Microbiota regulate intestinal epithelial gene expression by suppressing the transcription factor Hepatocyte nuclear factor 4 alpha
Source: Genome Res. 2017 Jul;27(7):1195–206. doi: 10.1101/gr.220111.116 (PMC5495071; doi:10.1101/gr.220111.116)
Supplement: Supplemental Material [file supp_gr.220111.116_Supplemental_Table_S4.xlsx]

## Sheet: Sup. Table S4 Gene List i
Supplemental Table S4: Ensembl Gene IDs from differential zebrafish gene lists (related to Fig. 2 and Supplemental Fig.S3)
Supplemental Fig. S3D: Gene List i
Gene_ID
ENSDARG00000017882
ENSDARG00000042953
ENSDARG00000006427
ENSDARG00000032200
ENSDARG00000070038
ENSDARG00000045123
ENSDARG00000069333
ENSDARG00000056196
ENSDARG00000035603
ENSDARG00000062085
ENSDARG00000020866
ENSDARG00000040298
ENSDARG00000036427
ENSDARG00000022261
ENSDARG00000032584
ENSDARG00000009612
ENSDARG00000003113
ENSDARG00000004078
ENSDARG00000053853
ENSDARG00000037359
ENSDARG00000038475
ENSDARG00000051940
ENSDARG00000051874
ENSDARG00000071377
ENSDARG00000006491
ENSDARG00000092404
ENSDARG00000030893
ENSDARG00000045878
ENSDARG00000042124
ENSDARG00000035544
ENSDARG00000019228
ENSDARG00000015179
ENSDARG00000068437
ENSDARG00000014333
ENSDARG00000035882
ENSDARG00000025350
ENSDARG00000060500
ENSDARG00000091368
ENSDARG00000089919
ENSDARG00000015622
ENSDARG00000076313
ENSDARG00000074613
ENSDARG00000015922
ENSDARG00000000161
ENSDARG00000059227
ENSDARG00000070057
ENSDARG00000021383
ENSDARG00000061355
ENSDARG00000014572
ENSDARG00000024143
ENSDARG00000019260
ENSDARG00000018944
ENSDARG00000052772
ENSDARG00000043848
ENSDARG00000093780
ENSDARG00000013177
ENSDARG00000070140
ENSDARG00000016357
ENSDARG00000053331
ENSDARG00000008192
ENSDARG00000036966
ENSDARG00000058996
ENSDARG00000025904
ENSDARG00000090135
ENSDARG00000076919
ENSDARG00000054836
ENSDARG00000038713
ENSDARG00000096508
ENSDARG00000019713
ENSDARG00000076294
ENSDARG00000038123
ENSDARG00000068966
ENSDARG00000012640
ENSDARG00000032862
ENSDARG00000086740
ENSDARG00000063126
ENSDARG00000040002
ENSDARG00000020364
ENSDARG00000068478
ENSDARG00000021293
ENSDARG00000057148
ENSDARG00000043511
ENSDARG00000091405
ENSDARG00000019532
ENSDARG00000026797
ENSDARG00000070844
ENSDARG00000056551
ENSDARG00000089310
ENSDARG00000030530
ENSDARG00000070892
ENSDARG00000069293
ENSDARG00000090722
ENSDARG00000088075
ENSDARG00000011463
ENSDARG00000074268
ENSDARG00000075930
ENSDARG00000018750
ENSDARG00000055240
ENSDARG00000038694
ENSDARG00000051935
ENSDARG00000095462
ENSDARG00000070017
ENSDARG00000063242
ENSDARG00000043081
ENSDARG00000018459
ENSDARG00000077664
ENSDARG00000077911
ENSDARG00000042697
ENSDARG00000094978
ENSDARG00000077058
ENSDARG00000086680
ENSDARG00000052074
ENSDARG00000043816
ENSDARG00000057844
ENSDARG00000037836
ENSDARG00000055036
ENSDARG00000041595
ENSDARG00000091826
ENSDARG00000035088
ENSDARG00000070558
ENSDARG00000088056
ENSDARG00000096246
ENSDARG00000095280
ENSDARG00000062947
ENSDARG00000009160
ENSDARG00000096077
ENSDARG00000094120
ENSDARG00000093964
ENSDARG00000025977
ENSDARG00000007040
ENSDARG00000017338
ENSDARG00000045414
ENSDARG00000059700
ENSDARG00000061797
ENSDARG00000054218
ENSDARG00000027620
ENSDARG00000087782
ENSDARG00000093078
ENSDARG00000018361
ENSDARG00000019932
ENSDARG00000074282
ENSDARG00000068883
ENSDARG00000060315
ENSDARG00000032816
ENSDARG00000078770
ENSDARG00000087857
ENSDARG00000058678
ENSDARG00000058445
ENSDARG00000035257
ENSDARG00000021172
ENSDARG00000032206
ENSDARG00000069828
ENSDARG00000015033
ENSDARG00000044802
ENSDARG00000054184
ENSDARG00000069548
ENSDARG00000096445
ENSDARG00000003675
ENSDARG00000014806
ENSDARG00000086620
ENSDARG00000056144
ENSDARG00000087126
ENSDARG00000058775
ENSDARG00000088933
ENSDARG00000032319
ENSDARG00000075487
ENSDARG00000042978
ENSDARG00000038865
ENSDARG00000063059
ENSDARG00000005518
ENSDARG00000073876
ENSDARG00000061819
ENSDARG00000017985
ENSDARG00000022599
ENSDARG00000070029
ENSDARG00000074341
ENSDARG00000055835
ENSDARG00000087157
ENSDARG00000085385
ENSDARG00000045638
ENSDARG00000086370
ENSDARG00000005179
ENSDARG00000040574
ENSDARG00000006501
ENSDARG00000059305
ENSDARG00000094112
ENSDARG00000094089
ENSDARG00000040290
ENSDARG00000013423
ENSDARG00000037067
ENSDARG00000068967
ENSDARG00000078918
ENSDARG00000033594
ENSDARG00000086254
ENSDARG00000076487
ENSDARG00000087692
ENSDARG00000087633
ENSDARG00000062182
ENSDARG00000005335
ENSDARG00000092580
ENSDARG00000037533
ENSDARG00000087356
ENSDARG00000027992
ENSDARG00000029747
ENSDARG00000088625
ENSDARG00000078137
ENSDARG00000087906
ENSDARG00000091431
ENSDARG00000059939
ENSDARG00000095362
ENSDARG00000005823
ENSDARG00000052361
ENSDARG00000076402
ENSDARG00000059423
ENSDARG00000038533
ENSDARG00000091212
ENSDARG00000067678
ENSDARG00000016856
ENSDARG00000076563
ENSDARG00000089878
ENSDARG00000043170
ENSDARG00000053845
ENSDARG00000076825
ENSDARG00000074881
ENSDARG00000087263
ENSDARG00000089837
ENSDARG00000010146
ENSDARG00000052110
ENSDARG00000091211
ENSDARG00000043168
ENSDARG00000009653
ENSDARG00000092890
ENSDARG00000009153
ENSDARG00000089507
ENSDARG00000078455
ENSDARG00000017388
ENSDARG00000032769
ENSDARG00000075715
ENSDARG00000092680
ENSDARG00000012632
ENSDARG00000004251
ENSDARG00000068706
ENSDARG00000056510
ENSDARG00000002994
ENSDARG00000042780
ENSDARG00000074457
ENSDARG00000026764
ENSDARG00000042613
ENSDARG00000079901
ENSDARG00000057498
ENSDARG00000007366
ENSDARG00000095807
ENSDARG00000015866
ENSDARG00000052470
ENSDARG00000021573
ENSDARG00000056498
ENSDARG00000056462
ENSDARG00000091136
ENSDARG00000074712
ENSDARG00000021208
ENSDARG00000039517
ENSDARG00000074580
ENSDARG00000070960
ENSDARG00000062998
ENSDARG00000028435
ENSDARG00000091897
ENSDARG00000071116
ENSDARG00000058601
ENSDARG00000041645
ENSDARG00000004724
ENSDARG00000037191
ENSDARG00000095963
ENSDARG00000034862
ENSDARG00000089717
ENSDARG00000090286
ENSDARG00000007988
ENSDARG00000088390
ENSDARG00000036085
ENSDARG00000074684
ENSDARG00000070918
ENSDARG00000033440
ENSDARG00000068644
ENSDARG00000021154
ENSDARG00000069054
ENSDARG00000075164
ENSDARG00000086539
ENSDARG00000075151
ENSDARG00000091972
ENSDARG00000011373
ENSDARG00000052176
ENSDARG00000023624
ENSDARG00000018806
ENSDARG00000005578
ENSDARG00000036968
ENSDARG00000053973
ENSDARG00000076111
ENSDARG00000039116
ENSDARG00000023151
ENSDARG00000039211
ENSDARG00000006766
ENSDARG00000043457
ENSDARG00000037425
ENSDARG00000080010
ENSDARG00000036237
ENSDARG00000005191
ENSDARG00000009447
ENSDARG00000006926
ENSDARG00000042428
ENSDARG00000021669
ENSDARG00000053684
ENSDARG00000015626
ENSDARG00000037000
ENSDARG00000090899
ENSDARG00000068680
ENSDARG00000021339
ENSDARG00000040799
ENSDARG00000043722
ENSDARG00000056744
ENSDARG00000052578
ENSDARG00000007276
ENSDARG00000044445
ENSDARG00000045834
ENSDARG00000045835
ENSDARG00000013856
ENSDARG00000060350
ENSDARG00000030915
ENSDARG00000024503
ENSDARG00000056765
ENSDARG00000079274
ENSDARG00000042993
ENSDARG00000012539
ENSDARG00000017314
ENSDARG00000017490
ENSDARG00000073742
ENSDARG00000014554
ENSDARG00000059841
ENSDARG00000026335
ENSDARG00000004909
ENSDARG00000017772
ENSDARG00000020742
ENSDARG00000060181
ENSDARG00000014101
ENSDARG00000011299
ENSDARG00000055591
ENSDARG00000068745
ENSDARG00000087983
ENSDARG00000076852
ENSDARG00000046030
ENSDARG00000002249
ENSDARG00000089821
ENSDARG00000040282
ENSDARG00000030254
ENSDARG00000063667
ENSDARG00000068410
ENSDARG00000070416
ENSDARG00000012194
ENSDARG00000040072
ENSDARG00000019917
ENSDARG00000040426
ENSDARG00000067607
ENSDARG00000060524
ENSDARG00000038667
ENSDARG00000042010
ENSDARG00000035652
ENSDARG00000069100
ENSDARG00000015167
ENSDARG00000057378
ENSDARG00000055416
ENSDARG00000003902
ENSDARG00000077855
ENSDARG00000055539
ENSDARG00000009443
ENSDARG00000054786
ENSDARG00000090469
ENSDARG00000045442
ENSDARG00000039730
ENSDARG00000034215
ENSDARG00000091609
ENSDARG00000036834
ENSDARG00000043257
ENSDARG00000029822
ENSDARG00000058462
ENSDARG00000058458
ENSDARG00000077028
ENSDARG00000033426
ENSDARG00000074659
ENSDARG00000060518
ENSDARG00000017254
ENSDARG00000002414
ENSDARG00000007180
ENSDARG00000025538
ENSDARG00000074556
ENSDARG00000086985
ENSDARG00000044566
ENSDARG00000079926
ENSDARG00000043173
ENSDARG00000010541
ENSDARG00000000212
ENSDARG00000077880
ENSDARG00000088079
ENSDARG00000062855
ENSDARG00000018263
ENSDARG00000035350
ENSDARG00000078541
ENSDARG00000003991
ENSDARG00000036481
ENSDARG00000029476
ENSDARG00000069186
ENSDARG00000051989
ENSDARG00000030166
ENSDARG00000036433
ENSDARG00000036875
ENSDARG00000063190
ENSDARG00000019081
ENSDARG00000096413
ENSDARG00000005034
ENSDARG00000055190
ENSDARG00000070958
ENSDARG00000077782
ENSDARG00000010946
ENSDARG00000054597
ENSDARG00000042270
ENSDARG00000044204
ENSDARG00000039393
ENSDARG00000023058
ENSDARG00000029377
ENSDARG00000091514
ENSDARG00000034080
ENSDARG00000038901
ENSDARG00000057419
ENSDARG00000068760
ENSDARG00000092244
ENSDARG00000007628
ENSDARG00000009209
ENSDARG00000028087
ENSDARG00000090914
ENSDARG00000001354
ENSDARG00000035149
ENSDARG00000032738
ENSDARG00000086259
ENSDARG00000068710
ENSDARG00000059115
ENSDARG00000071076
ENSDARG00000041569
ENSDARG00000087194
ENSDARG00000037281
ENSDARG00000045299
ENSDARG00000036833
ENSDARG00000010244
ENSDARG00000038199
ENSDARG00000020741
ENSDARG00000088911
ENSDARG00000026904
ENSDARG00000062943
ENSDARG00000057630
ENSDARG00000029388
ENSDARG00000031855
ENSDARG00000022372
ENSDARG00000030872
ENSDARG00000037144
ENSDARG00000039516
ENSDARG00000007024
ENSDARG00000058005
ENSDARG00000055159
ENSDARG00000042566
ENSDARG00000020153
ENSDARG00000062019
ENSDARG00000053365
ENSDARG00000058053
ENSDARG00000006526
ENSDARG00000088013
ENSDARG00000026218
ENSDARG00000042759
ENSDARG00000021494
ENSDARG00000052113
ENSDARG00000013371
ENSDARG00000040485
ENSDARG00000087277
ENSDARG00000093558
ENSDARG00000037307
ENSDARG00000074791
ENSDARG00000004880
ENSDARG00000074439
ENSDARG00000038076
ENSDARG00000007244
ENSDARG00000003181
ENSDARG00000069439
ENSDARG00000039007
ENSDARG00000056314
ENSDARG00000070830
ENSDARG00000090418
ENSDARG00000094416
ENSDARG00000052099
ENSDARG00000018351
ENSDARG00000024928
ENSDARG00000012187
ENSDARG00000038258
ENSDARG00000093068
ENSDARG00000010267
ENSDARG00000074570
ENSDARG00000077505
ENSDARG00000043016
ENSDARG00000059020
ENSDARG00000035819
ENSDARG00000045516
ENSDARG00000002197
ENSDARG00000088581
ENSDARG00000076045
ENSDARG00000018961
ENSDARG00000036316
ENSDARG00000088030
ENSDARG00000092807
ENSDARG00000014690
ENSDARG00000029533
ENSDARG00000058105
ENSDARG00000035692
ENSDARG00000011405
ENSDARG00000070849
ENSDARG00000053485
ENSDARG00000010160
ENSDARG00000006691
ENSDARG00000044635
ENSDARG00000059452
ENSDARG00000088952
ENSDARG00000029500
ENSDARG00000009285
ENSDARG00000011201
ENSDARG00000041619
ENSDARG00000030602
ENSDARG00000042905
ENSDARG00000030585
ENSDARG00000021838
ENSDARG00000015128
ENSDARG00000007708
ENSDARG00000042727
ENSDARG00000023768
ENSDARG00000020054
ENSDARG00000037140
ENSDARG00000034883
ENSDARG00000031680
ENSDARG00000007795
ENSDARG00000055722
ENSDARG00000089046
ENSDARG00000037066
ENSDARG00000061798
ENSDARG00000067969
ENSDARG00000087781
ENSDARG00000069244
ENSDARG00000069834
ENSDARG00000088177
ENSDARG00000061417
ENSDARG00000057241
ENSDARG00000089088
ENSDARG00000043275
ENSDARG00000073756
ENSDARG00000058440
ENSDARG00000096281
ENSDARG00000011926
ENSDARG00000040424
ENSDARG00000071062
ENSDARG00000026387
ENSDARG00000090578
ENSDARG00000067755
ENSDARG00000058180
ENSDARG00000056757
ENSDARG00000019525
ENSDARG00000088069
ENSDARG00000055520
ENSDARG00000079884
ENSDARG00000077960
ENSDARG00000091547
ENSDARG00000019294
ENSDARG00000041685
ENSDARG00000045522
ENSDARG00000038439

## Sheet: Sup. Table S4 Gene List ii
Supplemental Table S4: Ensembl Gene IDs from differential zebrafish gene lists (related to Fig. 2 and Supplemental Fig. S3)
Supplemental Fig. S3D: Gene List ii
Gene_ID
ENSDARG00000018846
ENSDARG00000054534
ENSDARG00000056480
ENSDARG00000040942
ENSDARG00000032327
ENSDARG00000027464
ENSDARG00000093774
ENSDARG00000078425
ENSDARG00000093925
ENSDARG00000034369
ENSDARG00000092747
ENSDARG00000029230
ENSDARG00000016649
ENSDARG00000052712
ENSDARG00000086592
ENSDARG00000007173
ENSDARG00000054300
ENSDARG00000042854
ENSDARG00000025375
ENSDARG00000076381
ENSDARG00000029905
ENSDARG00000059388
ENSDARG00000053439
ENSDARG00000000069
ENSDARG00000087856
ENSDARG00000004964
ENSDARG00000035120
ENSDARG00000074842
ENSDARG00000008921
ENSDARG00000087868
ENSDARG00000031761
ENSDARG00000061908
ENSDARG00000009783
ENSDARG00000096359
ENSDARG00000020952
ENSDARG00000029795
ENSDARG00000054937
ENSDARG00000003909
ENSDARG00000036587
ENSDARG00000059348
ENSDARG00000009252
ENSDARG00000018181
ENSDARG00000021555
ENSDARG00000003462
ENSDARG00000024708
ENSDARG00000054978
ENSDARG00000051915
ENSDARG00000089948
ENSDARG00000091685
ENSDARG00000068493
ENSDARG00000062003
ENSDARG00000045257
ENSDARG00000042112
ENSDARG00000061375
ENSDARG00000075931
ENSDARG00000031465
ENSDARG00000038296
ENSDARG00000015662
ENSDARG00000042939
ENSDARG00000077625
ENSDARG00000093834
ENSDARG00000034877
ENSDARG00000060790
ENSDARG00000010130
ENSDARG00000070775
ENSDARG00000076672
ENSDARG00000029011
ENSDARG00000075659
ENSDARG00000088366
ENSDARG00000062087
ENSDARG00000058284
ENSDARG00000086087
ENSDARG00000042188
ENSDARG00000026017
ENSDARG00000092574
ENSDARG00000036851
ENSDARG00000075016
ENSDARG00000078448
ENSDARG00000007906
ENSDARG00000016704
ENSDARG00000011636
ENSDARG00000025595
ENSDARG00000029446
ENSDARG00000008553
ENSDARG00000008887
ENSDARG00000090346
ENSDARG00000058608
ENSDARG00000004026
ENSDARG00000031873
ENSDARG00000074969
ENSDARG00000043843
ENSDARG00000087013
ENSDARG00000029874
ENSDARG00000019496
ENSDARG00000077082
ENSDARG00000037094
ENSDARG00000026369
ENSDARG00000031299
ENSDARG00000080018
ENSDARG00000039048
ENSDARG00000029890
ENSDARG00000002682
ENSDARG00000077330
ENSDARG00000092427
ENSDARG00000078437
ENSDARG00000032010
ENSDARG00000054588
ENSDARG00000036426
ENSDARG00000020529
ENSDARG00000073845
ENSDARG00000013657
ENSDARG00000074813
ENSDARG00000095512
ENSDARG00000034503
ENSDARG00000090814
ENSDARG00000091127
ENSDARG00000078567
ENSDARG00000078099
ENSDARG00000069540
ENSDARG00000077762
ENSDARG00000020344
ENSDARG00000005713
ENSDARG00000076308
ENSDARG00000077396
ENSDARG00000062517
ENSDARG00000058229
ENSDARG00000075118
ENSDARG00000090340
ENSDARG00000015822
ENSDARG00000073738
ENSDARG00000012953
ENSDARG00000039754
ENSDARG00000019498
ENSDARG00000075048
ENSDARG00000095832
ENSDARG00000090618
ENSDARG00000027009
ENSDARG00000056226
ENSDARG00000093553
ENSDARG00000015564
ENSDARG00000040683
ENSDARG00000042778
ENSDARG00000024278
ENSDARG00000025200
ENSDARG00000037551
ENSDARG00000044914
ENSDARG00000016074
ENSDARG00000062501
ENSDARG00000000972
ENSDARG00000029497
ENSDARG00000078761
ENSDARG00000006031
ENSDARG00000058603
ENSDARG00000091729
ENSDARG00000009470
ENSDARG00000088545
ENSDARG00000089785
ENSDARG00000067514
ENSDARG00000086194
ENSDARG00000090648
ENSDARG00000085673
ENSDARG00000069441
ENSDARG00000093043
ENSDARG00000029381
ENSDARG00000016494
ENSDARG00000071592
ENSDARG00000074561
ENSDARG00000036846
ENSDARG00000061201
ENSDARG00000023880
ENSDARG00000025108
ENSDARG00000045976
ENSDARG00000040568
ENSDARG00000038398
ENSDARG00000063481
ENSDARG00000018153
ENSDARG00000060260
ENSDARG00000018020
ENSDARG00000045946
ENSDARG00000091006
ENSDARG00000090903
ENSDARG00000074852
ENSDARG00000085803
ENSDARG00000037025
ENSDARG00000090255
ENSDARG00000029609
ENSDARG00000070966
ENSDARG00000074804
ENSDARG00000005356
ENSDARG00000074681
ENSDARG00000008931
ENSDARG00000076874
ENSDARG00000069282
ENSDARG00000089307
ENSDARG00000042357
ENSDARG00000063375
ENSDARG00000008859
ENSDARG00000010658
ENSDARG00000089340
ENSDARG00000076179
ENSDARG00000037411
ENSDARG00000052734
ENSDARG00000075517
ENSDARG00000031278
ENSDARG00000055876
ENSDARG00000001807
ENSDARG00000079888
ENSDARG00000032856
ENSDARG00000058332
ENSDARG00000090185
ENSDARG00000044047
ENSDARG00000062817
ENSDARG00000043059
ENSDARG00000005221
ENSDARG00000059960
ENSDARG00000077225
ENSDARG00000039423
ENSDARG00000092835
ENSDARG00000006811
ENSDARG00000077481
ENSDARG00000063078
ENSDARG00000056203
ENSDARG00000090129
ENSDARG00000093629
ENSDARG00000034443
ENSDARG00000008029
ENSDARG00000074628
ENSDARG00000025218
ENSDARG00000090686
ENSDARG00000021681
ENSDARG00000040387
ENSDARG00000034181
ENSDARG00000020149
ENSDARG00000056783
ENSDARG00000055897
ENSDARG00000074622
ENSDARG00000078284
ENSDARG00000020635
ENSDARG00000045415
ENSDARG00000006029
ENSDARG00000077039
ENSDARG00000059361
ENSDARG00000030237
ENSDARG00000070454
ENSDARG00000077875
ENSDARG00000089369
ENSDARG00000006447
ENSDARG00000052589
ENSDARG00000003635
ENSDARG00000037873
ENSDARG00000006220
ENSDARG00000078733
ENSDARG00000079369
ENSDARG00000041797
ENSDARG00000069157
ENSDARG00000070021
ENSDARG00000077192
ENSDARG00000078515
ENSDARG00000063511
ENSDARG00000039194
ENSDARG00000076964
ENSDARG00000078579
ENSDARG00000032640
ENSDARG00000035227
ENSDARG00000094730
ENSDARG00000069752
ENSDARG00000069549
ENSDARG00000089177
ENSDARG00000012968
ENSDARG00000091222
ENSDARG00000044456
ENSDARG00000073805
ENSDARG00000035601
ENSDARG00000086281
ENSDARG00000073909
ENSDARG00000010862
ENSDARG00000015731
ENSDARG00000002968
ENSDARG00000063412
ENSDARG00000060671
ENSDARG00000012829
ENSDARG00000026024
ENSDARG00000019877
ENSDARG00000002986
ENSDARG00000075159
ENSDARG00000043518
ENSDARG00000042379
ENSDARG00000075292
ENSDARG00000058218
ENSDARG00000088959
ENSDARG00000041540
ENSDARG00000054211
ENSDARG00000031777
ENSDARG00000011602
ENSDARG00000094877
ENSDARG00000060879
ENSDARG00000016918
ENSDARG00000042128
ENSDARG00000054207
ENSDARG00000069893
ENSDARG00000046012
ENSDARG00000017612
ENSDARG00000076117
ENSDARG00000012353
ENSDARG00000087511
ENSDARG00000043604
ENSDARG00000040523
ENSDARG00000004697
ENSDARG00000077691
ENSDARG00000014727
ENSDARG00000061145
ENSDARG00000017047
ENSDARG00000008637
ENSDARG00000042982
ENSDARG00000003931
ENSDARG00000059729
ENSDARG00000095633
ENSDARG00000091560
ENSDARG00000046091
ENSDARG00000074698
ENSDARG00000017126
ENSDARG00000045411
ENSDARG00000032639
ENSDARG00000026236
ENSDARG00000069591
ENSDARG00000086826
ENSDARG00000092976
ENSDARG00000087805
ENSDARG00000004687
ENSDARG00000044642
ENSDARG00000046098
ENSDARG00000096505
ENSDARG00000037361
ENSDARG00000002021
ENSDARG00000086717
ENSDARG00000042956
ENSDARG00000028804
ENSDARG00000063036
ENSDARG00000036636
ENSDARG00000043595
ENSDARG00000055342
ENSDARG00000079009
ENSDARG00000061021
ENSDARG00000051925
ENSDARG00000023712
ENSDARG00000074809
ENSDARG00000055118
ENSDARG00000059503
ENSDARG00000060756
ENSDARG00000020956
ENSDARG00000003854
ENSDARG00000055643
ENSDARG00000076980
ENSDARG00000039309
ENSDARG00000031475
ENSDARG00000042873
ENSDARG00000077891
ENSDARG00000086660
ENSDARG00000061994
ENSDARG00000043587
ENSDARG00000017794
ENSDARG00000004745
ENSDARG00000095464
ENSDARG00000078023
ENSDARG00000076271
ENSDARG00000096533
ENSDARG00000041848
ENSDARG00000042980
ENSDARG00000060707
ENSDARG00000059404
ENSDARG00000070386
ENSDARG00000088520
ENSDARG00000036291
ENSDARG00000053456
ENSDARG00000062956
ENSDARG00000088180
ENSDARG00000036863
ENSDARG00000036549
ENSDARG00000005565
ENSDARG00000006944
ENSDARG00000011845
ENSDARG00000061723
ENSDARG00000090710
ENSDARG00000007745
ENSDARG00000074210
ENSDARG00000063692
ENSDARG00000061736
ENSDARG00000091797
ENSDARG00000038121
ENSDARG00000090391
ENSDARG00000086782
ENSDARG00000074547
ENSDARG00000001169
ENSDARG00000040747
ENSDARG00000093619
ENSDARG00000013561
ENSDARG00000043334
ENSDARG00000005989
ENSDARG00000073764
ENSDARG00000061896
ENSDARG00000053381
ENSDARG00000061810
ENSDARG00000096645
ENSDARG00000039064
ENSDARG00000052580
ENSDARG00000088082
ENSDARG00000058836
ENSDARG00000023587
ENSDARG00000052696
ENSDARG00000041165
ENSDARG00000071020
ENSDARG00000078349
ENSDARG00000087532
ENSDARG00000019503
ENSDARG00000009740
ENSDARG00000071036
ENSDARG00000068181
ENSDARG00000011445
ENSDARG00000079591
ENSDARG00000019693
ENSDARG00000079895
ENSDARG00000087002
ENSDARG00000055395
ENSDARG00000074120
ENSDARG00000068140
ENSDARG00000003977
ENSDARG00000041787
ENSDARG00000055656
ENSDARG00000077688
ENSDARG00000053774
ENSDARG00000069409
ENSDARG00000002394
ENSDARG00000040890
ENSDARG00000030478
ENSDARG00000069266
ENSDARG00000076290
ENSDARG00000079166
ENSDARG00000005112
ENSDARG00000034105
ENSDARG00000076426
ENSDARG00000035990
ENSDARG00000017261
ENSDARG00000020718
ENSDARG00000018342
ENSDARG00000091387
ENSDARG00000019360
ENSDARG00000044528
ENSDARG00000039272
ENSDARG00000079420
ENSDARG00000013961
ENSDARG00000053493
ENSDARG00000087272
ENSDARG00000014232
ENSDARG00000057737
ENSDARG00000090422
ENSDARG00000073971
ENSDARG00000057262
ENSDARG00000075850
ENSDARG00000042096
ENSDARG00000005463
ENSDARG00000087377
ENSDARG00000061940
ENSDARG00000053159
ENSDARG00000070713
ENSDARG00000069018
ENSDARG00000089800
ENSDARG00000089368
ENSDARG00000039959
ENSDARG00000053965
ENSDARG00000087853
ENSDARG00000037634
ENSDARG00000016551
ENSDARG00000036630
ENSDARG00000087844
ENSDARG00000026500
ENSDARG00000076296
ENSDARG00000060360
ENSDARG00000082614
ENSDARG00000074760
ENSDARG00000068387
ENSDARG00000011170
ENSDARG00000005525
ENSDARG00000090997
ENSDARG00000055455
ENSDARG00000060813
ENSDARG00000081450
ENSDARG00000076081
ENSDARG00000039351
ENSDARG00000092714
ENSDARG00000093186
ENSDARG00000020286
ENSDARG00000079345
ENSDARG00000088234
ENSDARG00000076828
ENSDARG00000009161
ENSDARG00000057933

## Sheet: Sup. Table S4 Gene List iii
Supplemental Table S4: Ensembl Gene IDs from differential zebrafish gene lists (related to Fig. 2 and Supplemental Fig.3)
Supplemental Fig. S3D: Gene List iii
Gene_ID
ENSDARG00000081450
ENSDARG00000076081
ENSDARG00000039351
ENSDARG00000092714
ENSDARG00000093186
ENSDARG00000020286
ENSDARG00000079345
ENSDARG00000088234
ENSDARG00000076828
ENSDARG00000009161
ENSDARG00000057933
ENSDARG00000024815
ENSDARG00000017653
ENSDARG00000034650
ENSDARG00000017504
ENSDARG00000016541
ENSDARG00000079353
ENSDARG00000078178
ENSDARG00000078193
ENSDARG00000061432
ENSDARG00000038682
ENSDARG00000011449
ENSDARG00000058351
ENSDARG00000075730
ENSDARG00000079766
ENSDARG00000013024
ENSDARG00000086174
ENSDARG00000091689
ENSDARG00000000656
ENSDARG00000075029
ENSDARG00000075504
ENSDARG00000087454
ENSDARG00000038700
ENSDARG00000021982
ENSDARG00000068763
ENSDARG00000001656
ENSDARG00000086016
ENSDARG00000089434
ENSDARG00000071662
ENSDARG00000092894
ENSDARG00000036588
ENSDARG00000055436
ENSDARG00000043850
ENSDARG00000055186
ENSDARG00000092556
ENSDARG00000090889
ENSDARG00000059110
ENSDARG00000008186
ENSDARG00000023188
ENSDARG00000052826
ENSDARG00000060072
ENSDARG00000089933
ENSDARG00000087832
ENSDARG00000024789
ENSDARG00000068858
ENSDARG00000086838
ENSDARG00000079501
ENSDARG00000056324
ENSDARG00000093262
ENSDARG00000036084
ENSDARG00000043851
ENSDARG00000017038
ENSDARG00000008019
ENSDARG00000053878
ENSDARG00000093024
ENSDARG00000089362
ENSDARG00000079185
ENSDARG00000059572
ENSDARG00000053241
ENSDARG00000095772
ENSDARG00000063001
ENSDARG00000054921
ENSDARG00000076063
ENSDARG00000055781
ENSDARG00000093796
ENSDARG00000043899
ENSDARG00000013776
ENSDARG00000091278
ENSDARG00000036489
ENSDARG00000038587
ENSDARG00000095134
ENSDARG00000068586
ENSDARG00000089176
ENSDARG00000079226
ENSDARG00000025902
ENSDARG00000043781
ENSDARG00000086213
ENSDARG00000071456
ENSDARG00000071457
ENSDARG00000088044
ENSDARG00000074992
ENSDARG00000001303
ENSDARG00000033144
ENSDARG00000067794
ENSDARG00000076735
ENSDARG00000058302
ENSDARG00000059758
ENSDARG00000003615
ENSDARG00000067848
ENSDARG00000095730
ENSDARG00000077178
ENSDARG00000041524
ENSDARG00000044212
ENSDARG00000092945
ENSDARG00000077504
ENSDARG00000093572
ENSDARG00000012903
ENSDARG00000055426
ENSDARG00000016886
ENSDARG00000075265
ENSDARG00000059669
ENSDARG00000044094
ENSDARG00000079647
ENSDARG00000089050
ENSDARG00000044441
ENSDARG00000087811
ENSDARG00000041083
ENSDARG00000014657
ENSDARG00000037476
ENSDARG00000038669
ENSDARG00000026616
ENSDARG00000069193
ENSDARG00000004196
ENSDARG00000032768
ENSDARG00000054968
ENSDARG00000015829
ENSDARG00000079721
ENSDARG00000037190
ENSDARG00000093936
ENSDARG00000086142
ENSDARG00000044935
ENSDARG00000076386
ENSDARG00000079553
ENSDARG00000092225
ENSDARG00000054805
ENSDARG00000057974
ENSDARG00000075426
ENSDARG00000005218
ENSDARG00000062375
ENSDARG00000025607
ENSDARG00000009702
ENSDARG00000039852
ENSDARG00000021677
ENSDARG00000045190
ENSDARG00000059294
ENSDARG00000093712
ENSDARG00000013063
ENSDARG00000041835
ENSDARG00000092858
ENSDARG00000012422
ENSDARG00000095509
ENSDARG00000056200
ENSDARG00000087706
ENSDARG00000092285
ENSDARG00000036065
ENSDARG00000024365
ENSDARG00000053836
ENSDARG00000074656
ENSDARG00000070085
ENSDARG00000070059
ENSDARG00000028082
ENSDARG00000078166
ENSDARG00000094345
ENSDARG00000062063
ENSDARG00000091967
ENSDARG00000027658
ENSDARG00000095673
ENSDARG00000010729
ENSDARG00000054418
ENSDARG00000056065
ENSDARG00000094578
ENSDARG00000087575
ENSDARG00000021688
ENSDARG00000074217
ENSDARG00000002046
ENSDARG00000073994
ENSDARG00000068939
ENSDARG00000093748
ENSDARG00000041923
ENSDARG00000041917
ENSDARG00000035909
ENSDARG00000076483
ENSDARG00000029720
ENSDARG00000092222
ENSDARG00000091730
ENSDARG00000059824
ENSDARG00000075389
ENSDARG00000018587
ENSDARG00000052396
ENSDARG00000056804
ENSDARG00000091532
ENSDARG00000075668
ENSDARG00000075785
ENSDARG00000076182
ENSDARG00000014427
ENSDARG00000031359
ENSDARG00000073880
ENSDARG00000093857
ENSDARG00000074028
ENSDARG00000089463
ENSDARG00000086374
ENSDARG00000075770
ENSDARG00000088078
ENSDARG00000096562
ENSDARG00000044990
ENSDARG00000087434
ENSDARG00000088251
ENSDARG00000061177
ENSDARG00000071012
ENSDARG00000043584
ENSDARG00000004952
ENSDARG00000075757
ENSDARG00000057173
ENSDARG00000016527
ENSDARG00000069941
ENSDARG00000015865
ENSDARG00000007467
ENSDARG00000067661
ENSDARG00000026704
ENSDARG00000095298
ENSDARG00000053387
ENSDARG00000063538
ENSDARG00000040528
ENSDARG00000071543
ENSDARG00000045661
ENSDARG00000092584
ENSDARG00000075710
ENSDARG00000093412
ENSDARG00000058341
ENSDARG00000089423
ENSDARG00000057886
ENSDARG00000088260
ENSDARG00000006462
ENSDARG00000027183
ENSDARG00000045921
ENSDARG00000089319
ENSDARG00000053293
ENSDARG00000095309
ENSDARG00000096311
ENSDARG00000092259
ENSDARG00000087516
ENSDARG00000089661
ENSDARG00000045011
ENSDARG00000040445
ENSDARG00000089602
ENSDARG00000075643
ENSDARG00000052515
ENSDARG00000095282
ENSDARG00000033446
ENSDARG00000056469
ENSDARG00000074139
ENSDARG00000086903
ENSDARG00000077810
ENSDARG00000043586
ENSDARG00000030954
ENSDARG00000089227
ENSDARG00000012600
ENSDARG00000073789
ENSDARG00000094984
ENSDARG00000055476
ENSDARG00000069311
ENSDARG00000090473
ENSDARG00000003475
ENSDARG00000088443
ENSDARG00000069031
ENSDARG00000069390
ENSDARG00000095666
ENSDARG00000086315
ENSDARG00000010312
ENSDARG00000013916
ENSDARG00000089043
ENSDARG00000014106
ENSDARG00000025903
ENSDARG00000051912
ENSDARG00000054846
ENSDARG00000012694
ENSDARG00000043719
ENSDARG00000021004
ENSDARG00000067751
ENSDARG00000018722
ENSDARG00000075641
ENSDARG00000061672
ENSDARG00000094316
ENSDARG00000038957
ENSDARG00000069356
ENSDARG00000068926
ENSDARG00000043877
ENSDARG00000074194
ENSDARG00000019045
ENSDARG00000058873
ENSDARG00000077170
ENSDARG00000056030
ENSDARG00000062423
ENSDARG00000095532
ENSDARG00000093214
ENSDARG00000018553
ENSDARG00000079402
ENSDARG00000056798
ENSDARG00000092667
ENSDARG00000056985
ENSDARG00000076058
ENSDARG00000068637
ENSDARG00000076224
ENSDARG00000040200
ENSDARG00000030053
ENSDARG00000062655
ENSDARG00000059631
ENSDARG00000037155
ENSDARG00000077651
ENSDARG00000096599
ENSDARG00000071238
ENSDARG00000022652
ENSDARG00000088324
ENSDARG00000089432
ENSDARG00000093621
ENSDARG00000039501
ENSDARG00000071355
ENSDARG00000073735
ENSDARG00000010945
ENSDARG00000016290
ENSDARG00000095048
ENSDARG00000067664
ENSDARG00000079170
ENSDARG00000088553
ENSDARG00000086323
ENSDARG00000051827
ENSDARG00000007354
ENSDARG00000042008
ENSDARG00000061222
ENSDARG00000006848
ENSDARG00000053136
ENSDARG00000021859
ENSDARG00000052268
ENSDARG00000036628
ENSDARG00000026895
ENSDARG00000092520
ENSDARG00000052376
ENSDARG00000069102
ENSDARG00000018461
ENSDARG00000090946
ENSDARG00000096317
ENSDARG00000068749
ENSDARG00000087573
ENSDARG00000086538
ENSDARG00000069105
ENSDARG00000011581
ENSDARG00000086379
ENSDARG00000059956
ENSDARG00000069264
ENSDARG00000078177
ENSDARG00000071326
ENSDARG00000009087
ENSDARG00000001832
ENSDARG00000061275
ENSDARG00000076225
ENSDARG00000079165
ENSDARG00000038159
ENSDARG00000093671
ENSDARG00000070168
ENSDARG00000093173
ENSDARG00000056831
ENSDARG00000088280
ENSDARG00000091724
ENSDARG00000023324
ENSDARG00000092908
ENSDARG00000088981
ENSDARG00000015201
ENSDARG00000075963
ENSDARG00000094489
ENSDARG00000053366
ENSDARG00000074903
ENSDARG00000070581
ENSDARG00000022370
ENSDARG00000040860
ENSDARG00000009950
ENSDARG00000005320
ENSDARG00000031325
ENSDARG00000045075
ENSDARG00000095500
ENSDARG00000016611
ENSDARG00000054898
ENSDARG00000053940
ENSDARG00000094719
ENSDARG00000068944
ENSDARG00000087197
ENSDARG00000061103
ENSDARG00000096110
ENSDARG00000036068
ENSDARG00000074598
ENSDARG00000079589
ENSDARG00000009825
ENSDARG00000095410
ENSDARG00000056378
ENSDARG00000094894
ENSDARG00000086979
ENSDARG00000062864
ENSDARG00000043260
ENSDARG00000070515
ENSDARG00000053620
ENSDARG00000002981
ENSDARG00000071216
ENSDARG00000076838
ENSDARG00000092833
ENSDARG00000090053
ENSDARG00000005616
ENSDARG00000053480
ENSDARG00000007086
ENSDARG00000059809
ENSDARG00000094561
ENSDARG00000054530
ENSDARG00000052643
ENSDARG00000054202
ENSDARG00000076971
ENSDARG00000035610
ENSDARG00000036629
ENSDARG00000093392
ENSDARG00000069171
ENSDARG00000059743
ENSDARG00000030967
ENSDARG00000031664
ENSDARG00000095863
ENSDARG00000021895
ENSDARG00000045567
ENSDARG00000033928
ENSDARG00000057433
ENSDARG00000052314
ENSDARG00000092810
ENSDARG00000074246
ENSDARG00000017489
ENSDARG00000060477
ENSDARG00000092191
ENSDARG00000074754
ENSDARG00000078389
ENSDARG00000039243
ENSDARG00000009890
ENSDARG00000009673
ENSDARG00000090996
ENSDARG00000090837
ENSDARG00000031647
ENSDARG00000017569
ENSDARG00000094747
ENSDARG00000091620
ENSDARG00000003380
ENSDARG00000092361
ENSDARG00000071052
ENSDARG00000022934
ENSDARG00000092898
ENSDARG00000089901
ENSDARG00000044362
ENSDARG00000005163
ENSDARG00000089657
ENSDARG00000027750
ENSDARG00000069321
ENSDARG00000075905
ENSDARG00000030722
ENSDARG00000077571
ENSDARG00000035569
ENSDARG00000090969
ENSDARG00000020890
ENSDARG00000054510
ENSDARG00000067889
ENSDARG00000059166
ENSDARG00000012355
ENSDARG00000092071
ENSDARG00000043663
ENSDARG00000061858
ENSDARG00000032571
ENSDARG00000040130
ENSDARG00000092931
ENSDARG00000025615
ENSDARG00000029832
ENSDARG00000031413
ENSDARG00000074309
ENSDARG00000014709
ENSDARG00000010773
ENSDARG00000078152
ENSDARG00000088934
ENSDARG00000074663
ENSDARG00000044752
ENSDARG00000093279
ENSDARG00000093571
ENSDARG00000067806
ENSDARG00000079105
ENSDARG00000070774
ENSDARG00000052207
ENSDARG00000043443
ENSDARG00000096343
ENSDARG00000016319
ENSDARG00000076043
ENSDARG00000093801
ENSDARG00000058835
ENSDARG00000029105
ENSDARG00000040309
ENSDARG00000087732
ENSDARG00000086076
ENSDARG00000020659
ENSDARG00000008858
ENSDARG00000057773
ENSDARG00000073822
ENSDARG00000016231
ENSDARG00000020046
ENSDARG00000056762
ENSDARG00000069524
ENSDARG00000055138
ENSDARG00000028321
ENSDARG00000015453
ENSDARG00000014138
ENSDARG00000076274
ENSDARG00000041703
ENSDARG00000087359
ENSDARG00000075614
ENSDARG00000016867
ENSDARG00000013871
ENSDARG00000086283
ENSDARG00000070839
ENSDARG00000044803
ENSDARG00000079281
ENSDARG00000013828
ENSDARG00000009267
ENSDARG00000056719
ENSDARG00000068220
ENSDARG00000012506
ENSDARG00000076888
ENSDARG00000054837
ENSDARG00000033604
ENSDARG00000028345
ENSDARG00000012002
ENSDARG00000092239
ENSDARG00000002037
ENSDARG00000025559
ENSDARG00000030269
ENSDARG00000071005
ENSDARG00000053526
ENSDARG00000041110
ENSDARG00000079385
ENSDARG00000055226
ENSDARG00000079532
ENSDARG00000018621
ENSDARG00000019302
ENSDARG00000068857
ENSDARG00000095050
ENSDARG00000000241
ENSDARG00000062780
ENSDARG00000037857
ENSDARG00000024037
ENSDARG00000010098
ENSDARG00000062972
ENSDARG00000069339
ENSDARG00000037286
ENSDARG00000078481
ENSDARG00000068521
ENSDARG00000091332
ENSDARG00000087813
ENSDARG00000012684
ENSDARG00000089026
ENSDARG00000087749
ENSDARG00000020521
ENSDARG00000032344
ENSDARG00000089873
ENSDARG00000038646
ENSDARG00000057392
ENSDARG00000012535
ENSDARG00000096518
ENSDARG00000095750
ENSDARG00000037346
ENSDARG00000092648
ENSDARG00000055043
ENSDARG00000088571
ENSDARG00000095805
ENSDARG00000031014
ENSDARG00000060674
ENSDARG00000044626
ENSDARG00000078479
ENSDARG00000075698
ENSDARG00000036292
ENSDARG00000027572
ENSDARG00000070387
ENSDARG00000042293
ENSDARG00000055185
ENSDARG00000093184
ENSDARG00000078167
ENSDARG00000027070
ENSDARG00000063708
ENSDARG00000087697
ENSDARG00000004889
ENSDARG00000014053
ENSDARG00000056909
ENSDARG00000006137
ENSDARG00000062077
ENSDARG00000040926
ENSDARG00000068876
ENSDARG00000078342
ENSDARG00000053227
ENSDARG00000018146
ENSDARG00000088835
ENSDARG00000042521
ENSDARG00000036171
ENSDARG00000013800
ENSDARG00000036041
ENSDARG00000008969
ENSDARG00000011769
ENSDARG00000069933
ENSDARG00000023157
ENSDARG00000092515
ENSDARG00000087403
ENSDARG00000090844
ENSDARG00000036832
ENSDARG00000002129
ENSDARG00000005004
ENSDARG00000077301
ENSDARG00000086944
ENSDARG00000019986
ENSDARG00000008035
ENSDARG00000042562
ENSDARG00000043395
ENSDARG00000052534
ENSDARG00000058492
ENSDARG00000007421
ENSDARG00000087671
ENSDARG00000033361
ENSDARG00000036903
ENSDARG00000010878
ENSDARG00000053802
ENSDARG00000018406
ENSDARG00000089980
ENSDARG00000027529
ENSDARG00000088606
ENSDARG00000096304
ENSDARG00000014916
ENSDARG00000087131
ENSDARG00000093491
ENSDARG00000057881
ENSDARG00000020239
ENSDARG00000077316
ENSDARG00000036155
ENSDARG00000026787
ENSDARG00000010728
ENSDARG00000078419
ENSDARG00000094012
ENSDARG00000022698
ENSDARG00000076765
ENSDARG00000086525
ENSDARG00000028850
ENSDARG00000088011
ENSDARG00000076845
ENSDARG00000006025
ENSDARG00000071386
ENSDARG00000074041
ENSDARG00000002299
ENSDARG00000090579
ENSDARG00000093370
ENSDARG00000086391
ENSDARG00000031817
ENSDARG00000068981
ENSDARG00000093006
ENSDARG00000096045
ENSDARG00000039682
ENSDARG00000074142
ENSDARG00000089023
ENSDARG00000068515
ENSDARG00000095421
ENSDARG00000074067
ENSDARG00000039241
ENSDARG00000079907
ENSDARG00000012330
ENSDARG00000078707
ENSDARG00000095351
ENSDARG00000052215
ENSDARG00000069733
ENSDARG00000040608
ENSDARG00000075083
ENSDARG00000002165
ENSDARG00000037607
ENSDARG00000031587
ENSDARG00000041107
ENSDARG00000070832
ENSDARG00000024654
ENSDARG00000043729
ENSDARG00000093799
ENSDARG00000076622
ENSDARG00000086642
ENSDARG00000090535
ENSDARG00000052899
ENSDARG00000052900
ENSDARG00000009693
ENSDARG00000089204

## Sheet: Sup. Table S4 Gene List iv
Supplemental Table S4: Ensembl Gene IDs from differential zebrafish gene lists (related to Fig. 2 and Supplemental Fig.3)
Supplemental Fig. S3D: Gene List iv
Gene_ID
ENSDARG00000026979
ENSDARG00000070317
ENSDARG00000086586
ENSDARG00000042336
ENSDARG00000033579
ENSDARG00000007915
ENSDARG00000093079
ENSDARG00000093042
ENSDARG00000070116
ENSDARG00000088929
ENSDARG00000011703
ENSDARG00000043237
ENSDARG00000008064
ENSDARG00000025914
ENSDARG00000029370
ENSDARG00000079881
ENSDARG00000077737
ENSDARG00000088020
ENSDARG00000062304
ENSDARG00000026548
ENSDARG00000029587
ENSDARG00000096667
ENSDARG00000061585
ENSDARG00000017780
ENSDARG00000076376
ENSDARG00000091131
ENSDARG00000069074
ENSDARG00000045033
ENSDARG00000053820
ENSDARG00000090850
ENSDARG00000070930
ENSDARG00000077004
ENSDARG00000018061
ENSDARG00000013743
ENSDARG00000038006
ENSDARG00000090913
ENSDARG00000040469
ENSDARG00000007080
ENSDARG00000088060
ENSDARG00000089304
ENSDARG00000079347
ENSDARG00000004958
ENSDARG00000071341
ENSDARG00000069796
ENSDARG00000036865
ENSDARG00000060051
ENSDARG00000017365
ENSDARG00000011281
ENSDARG00000043180
ENSDARG00000042807
ENSDARG00000054319
ENSDARG00000077207
ENSDARG00000042214
ENSDARG00000036868
ENSDARG00000009494
ENSDARG00000004405
ENSDARG00000013719
ENSDARG00000007477
ENSDARG00000025468
ENSDARG00000087180
ENSDARG00000045929
ENSDARG00000038366
ENSDARG00000044034
ENSDARG00000076223
ENSDARG00000039310
ENSDARG00000089019
ENSDARG00000042310
ENSDARG00000027491
ENSDARG00000055510
ENSDARG00000078581
ENSDARG00000057767
ENSDARG00000057231
ENSDARG00000006546
ENSDARG00000041137
ENSDARG00000020123
ENSDARG00000013524
ENSDARG00000061214
ENSDARG00000044426
ENSDARG00000059432
ENSDARG00000053804
ENSDARG00000091025
ENSDARG00000094333
ENSDARG00000074258
ENSDARG00000053405
ENSDARG00000020387
ENSDARG00000004167
ENSDARG00000041140
ENSDARG00000043562
ENSDARG00000059923
ENSDARG00000053483
ENSDARG00000023820
ENSDARG00000026821
ENSDARG00000007531
ENSDARG00000011770
ENSDARG00000042630
ENSDARG00000088549
ENSDARG00000041951
ENSDARG00000077296
ENSDARG00000059857
ENSDARG00000030156
ENSDARG00000018600
ENSDARG00000011065
ENSDARG00000091156
ENSDARG00000036942
ENSDARG00000042824
ENSDARG00000036864
ENSDARG00000010655
ENSDARG00000040930
ENSDARG00000071150
ENSDARG00000044511
ENSDARG00000005593
ENSDARG00000002396
ENSDARG00000045768
ENSDARG00000078805
ENSDARG00000079939
ENSDARG00000033501
ENSDARG00000044381
ENSDARG00000078902
ENSDARG00000087873
ENSDARG00000071211
ENSDARG00000078752
ENSDARG00000070390
ENSDARG00000075612
ENSDARG00000075400
ENSDARG00000021372
ENSDARG00000073988
ENSDARG00000004115
ENSDARG00000038196
ENSDARG00000045574
ENSDARG00000042620
ENSDARG00000062096
ENSDARG00000071017
ENSDARG00000019301
ENSDARG00000070214
ENSDARG00000057352
ENSDARG00000022378
ENSDARG00000061580
ENSDARG00000087993
ENSDARG00000031164
ENSDARG00000070011
ENSDARG00000022832
ENSDARG00000086623
ENSDARG00000045627
ENSDARG00000070145
ENSDARG00000086070
ENSDARG00000067570
ENSDARG00000001870
ENSDARG00000014556
ENSDARG00000090225
ENSDARG00000091054
ENSDARG00000086406
ENSDARG00000087039
ENSDARG00000055101
ENSDARG00000024090
ENSDARG00000086745
ENSDARG00000037870
ENSDARG00000043077
ENSDARG00000016721
ENSDARG00000013312
ENSDARG00000036017
ENSDARG00000056627
ENSDARG00000075435
ENSDARG00000007597
ENSDARG00000089138
ENSDARG00000039926
ENSDARG00000045658
ENSDARG00000011948
ENSDARG00000071524
ENSDARG00000074255
ENSDARG00000015506
ENSDARG00000020693
ENSDARG00000045130
ENSDARG00000061450
ENSDARG00000014022
ENSDARG00000078270
ENSDARG00000063706
ENSDARG00000063031
ENSDARG00000052065
ENSDARG00000077709
ENSDARG00000013690
ENSDARG00000052109
ENSDARG00000077726
ENSDARG00000086269
ENSDARG00000037357
ENSDARG00000028048
ENSDARG00000039150
ENSDARG00000051939
ENSDARG00000018478
ENSDARG00000026582
ENSDARG00000039390
ENSDARG00000086632
ENSDARG00000069956
ENSDARG00000053152
ENSDARG00000055225
ENSDARG00000045160
ENSDARG00000095209
ENSDARG00000054999
ENSDARG00000014969
ENSDARG00000086512
ENSDARG00000091600
ENSDARG00000059826
ENSDARG00000069295
ENSDARG00000093382
ENSDARG00000028517
ENSDARG00000075015
ENSDARG00000075958
ENSDARG00000096569
ENSDARG00000026655
ENSDARG00000039093
ENSDARG00000043102
ENSDARG00000079932
ENSDARG00000086217
ENSDARG00000062518
ENSDARG00000079933
ENSDARG00000035732
ENSDARG00000070420
ENSDARG00000059461
ENSDARG00000074522
ENSDARG00000042877
ENSDARG00000095181
ENSDARG00000092394
ENSDARG00000008275
ENSDARG00000058102
ENSDARG00000023583
ENSDARG00000069029
ENSDARG00000074093
ENSDARG00000055381
ENSDARG00000059948
ENSDARG00000024717
ENSDARG00000023176
ENSDARG00000042753
ENSDARG00000076809
ENSDARG00000027088
ENSDARG00000092726
ENSDARG00000058409
ENSDARG00000071083
ENSDARG00000089389
ENSDARG00000054400
ENSDARG00000074806
ENSDARG00000090712
ENSDARG00000078694
ENSDARG00000089979
ENSDARG00000056541
ENSDARG00000012986
ENSDARG00000052497
ENSDARG00000061011
ENSDARG00000004094
ENSDARG00000053570
ENSDARG00000062278
ENSDARG00000071462
ENSDARG00000007302
ENSDARG00000055331
ENSDARG00000071429
ENSDARG00000015890
ENSDARG00000061770
ENSDARG00000089568
ENSDARG00000079151
ENSDARG00000089638
ENSDARG00000091157
ENSDARG00000085168
ENSDARG00000036414
ENSDARG00000043034
ENSDARG00000025846
ENSDARG00000017773
ENSDARG00000008697
ENSDARG00000043447
ENSDARG00000093162
ENSDARG00000060288
ENSDARG00000021149
ENSDARG00000053484
ENSDARG00000089730
ENSDARG00000037121
ENSDARG00000016132
ENSDARG00000040815
ENSDARG00000079946
ENSDARG00000006215
ENSDARG00000028478
ENSDARG00000096269
ENSDARG00000055540
ENSDARG00000059035
ENSDARG00000042920
ENSDARG00000013236
ENSDARG00000008491
ENSDARG00000056410
ENSDARG00000063665
ENSDARG00000042641
ENSDARG00000061274
ENSDARG00000057723
ENSDARG00000004355
ENSDARG00000092578
ENSDARG00000077547
ENSDARG00000090766
ENSDARG00000087188
ENSDARG00000088087
ENSDARG00000070571
ENSDARG00000004060
ENSDARG00000089345
ENSDARG00000062195
ENSDARG00000070229
ENSDARG00000002411
ENSDARG00000028715
ENSDARG00000089127
ENSDARG00000057035
ENSDARG00000036944
ENSDARG00000027017
ENSDARG00000056781
ENSDARG00000078705
ENSDARG00000078373
ENSDARG00000090063
ENSDARG00000059555
ENSDARG00000089462
ENSDARG00000005567
ENSDARG00000003754
ENSDARG00000060534
ENSDARG00000079618
ENSDARG00000004532
ENSDARG00000087135
ENSDARG00000060504
ENSDARG00000008457
ENSDARG00000074876
ENSDARG00000069419
ENSDARG00000054447
ENSDARG00000029751
ENSDARG00000024694
ENSDARG00000013056
ENSDARG00000042409
ENSDARG00000060096
ENSDARG00000005232
ENSDARG00000025797
ENSDARG00000005397
ENSDARG00000009594
ENSDARG00000001910
ENSDARG00000009862
ENSDARG00000011583
ENSDARG00000016081
ENSDARG00000062315
ENSDARG00000044281
ENSDARG00000078691
ENSDARG00000063167
ENSDARG00000075230
ENSDARG00000089885
ENSDARG00000056101
ENSDARG00000010519
ENSDARG00000039117
ENSDARG00000074435
ENSDARG00000075673
ENSDARG00000061687
ENSDARG00000020944
ENSDARG00000040466
ENSDARG00000058108
ENSDARG00000002148
ENSDARG00000036722
ENSDARG00000045269
ENSDARG00000059651
ENSDARG00000053858
ENSDARG00000036878
ENSDARG00000039203
ENSDARG00000092959
ENSDARG00000040334
ENSDARG00000067729
ENSDARG00000093044
ENSDARG00000033367
ENSDARG00000042617
ENSDARG00000058688
ENSDARG00000045461
ENSDARG00000011582
ENSDARG00000002523
ENSDARG00000052738
ENSDARG00000036239
ENSDARG00000077326
ENSDARG00000042737
ENSDARG00000058953
ENSDARG00000052271
ENSDARG00000004130
ENSDARG00000061481
ENSDARG00000010936
ENSDARG00000088171
ENSDARG00000019838
ENSDARG00000027986
ENSDARG00000093640
ENSDARG00000071087
ENSDARG00000022995
ENSDARG00000015337
ENSDARG00000054172
ENSDARG00000040553
ENSDARG00000033285
ENSDARG00000069292
ENSDARG00000069375
ENSDARG00000053087
ENSDARG00000036135
ENSDARG00000088836
ENSDARG00000026376
ENSDARG00000004979
ENSDARG00000003397
ENSDARG00000078872
ENSDARG00000018002
ENSDARG00000076414
ENSDARG00000033160
ENSDARG00000024049
ENSDARG00000056885
ENSDARG00000012499
ENSDARG00000055945
ENSDARG00000074971
ENSDARG00000068374
ENSDARG00000087495
ENSDARG00000013721
ENSDARG00000074752
ENSDARG00000012340
ENSDARG00000068708
ENSDARG00000014439
ENSDARG00000053097
ENSDARG00000074195
ENSDARG00000056892
ENSDARG00000094923
ENSDARG00000088995
ENSDARG00000090598
ENSDARG00000015449
ENSDARG00000044526
ENSDARG00000016713
ENSDARG00000092478
ENSDARG00000075161
ENSDARG00000037587
ENSDARG00000071007
ENSDARG00000057598
ENSDARG00000031737
ENSDARG00000016736
ENSDARG00000005600
ENSDARG00000056630
ENSDARG00000017884
ENSDARG00000013794
ENSDARG00000043154
ENSDARG00000074827
ENSDARG00000057128
ENSDARG00000022631
ENSDARG00000018258
ENSDARG00000059054
ENSDARG00000063297
ENSDARG00000037154
ENSDARG00000002405
ENSDARG00000045595
ENSDARG00000005762
ENSDARG00000069101
ENSDARG00000087431
ENSDARG00000070948
ENSDARG00000031618
ENSDARG00000054288
ENSDARG00000002167
ENSDARG00000017165
ENSDARG00000041560
ENSDARG00000076773
ENSDARG00000040657
ENSDARG00000018534
ENSDARG00000027584
ENSDARG00000045150
ENSDARG00000068779
ENSDARG00000007566
ENSDARG00000063634
ENSDARG00000087752
ENSDARG00000043553
ENSDARG00000075334
ENSDARG00000095749
ENSDARG00000039778
ENSDARG00000090804
ENSDARG00000074453
ENSDARG00000057772
ENSDARG00000079716
ENSDARG00000016505
ENSDARG00000057497
ENSDARG00000046053
ENSDARG00000015991
ENSDARG00000012949
ENSDARG00000062272
ENSDARG00000016687
ENSDARG00000035519
ENSDARG00000059817
ENSDARG00000059950
ENSDARG00000058285
ENSDARG00000079651
ENSDARG00000011955
ENSDARG00000089390
ENSDARG00000033609
ENSDARG00000052923
ENSDARG00000017549
ENSDARG00000034826
ENSDARG00000052638
ENSDARG00000062237
ENSDARG00000040453
ENSDARG00000015856
ENSDARG00000025122
ENSDARG00000016532
ENSDARG00000090675
ENSDARG00000010415
ENSDARG00000004141
ENSDARG00000038900
ENSDARG00000022183
ENSDARG00000088119
ENSDARG00000090311
ENSDARG00000078491
ENSDARG00000038500
ENSDARG00000030781
ENSDARG00000003869
ENSDARG00000090228
ENSDARG00000059965
ENSDARG00000061688
ENSDARG00000010681
ENSDARG00000045870
ENSDARG00000038845
ENSDARG00000063438
ENSDARG00000030765
ENSDARG00000075766
ENSDARG00000018032
ENSDARG00000004227
ENSDARG00000002219
ENSDARG00000012738
ENSDARG00000071518
ENSDARG00000038153
ENSDARG00000076073
ENSDARG00000074184
ENSDARG00000079688
ENSDARG00000020891
ENSDARG00000059874
ENSDARG00000016868
ENSDARG00000086789
ENSDARG00000005154
ENSDARG00000007129
ENSDARG00000039832
ENSDARG00000000966
ENSDARG00000020465
ENSDARG00000020876
ENSDARG00000091209
ENSDARG00000090895
ENSDARG00000069883
ENSDARG00000040407
ENSDARG00000030844
ENSDARG00000019233
ENSDARG00000053554
ENSDARG00000039931
ENSDARG00000076867
ENSDARG00000029818
ENSDARG00000059333
ENSDARG00000013522
ENSDARG00000028017
ENSDARG00000035323
ENSDARG00000075282
ENSDARG00000009870
ENSDARG00000076564
ENSDARG00000017220
ENSDARG00000094847
ENSDARG00000063540
ENSDARG00000012524
ENSDARG00000088879
ENSDARG00000062044
ENSDARG00000060006
ENSDARG00000041078
ENSDARG00000009242
ENSDARG00000062268
ENSDARG00000019231
ENSDARG00000017665
ENSDARG00000038260
ENSDARG00000034933
ENSDARG00000078145
ENSDARG00000061885
ENSDARG00000075425
ENSDARG00000019316
ENSDARG00000011573
ENSDARG00000075665
ENSDARG00000095911
ENSDARG00000070907
ENSDARG00000013605
ENSDARG00000092600
ENSDARG00000004771
ENSDARG00000000796
ENSDARG00000031683
ENSDARG00000037421
ENSDARG00000071430
ENSDARG00000078947
ENSDARG00000016448
ENSDARG00000052792
ENSDARG00000058944
ENSDARG00000045089
ENSDARG00000009040

## Sheet: Sup. Table S4 Gene List v
Supplemental Table S4: Ensembl Gene IDs from differential zebrafish gene lists (related to Fig. 2 and Supplemental Fig.3)
Supplemental Fig. S3D: Gene List v
Gene_ID
ENSDARG00000089418
ENSDARG00000069017
ENSDARG00000032976
ENSDARG00000011400
ENSDARG00000019096
ENSDARG00000052960
ENSDARG00000090637
ENSDARG00000020610
ENSDARG00000015247
ENSDARG00000031952
ENSDARG00000071090
ENSDARG00000052708
ENSDARG00000005841
ENSDARG00000011615
ENSDARG00000052958
ENSDARG00000018491
ENSDARG00000029071
ENSDARG00000090689
ENSDARG00000020103
ENSDARG00000087390
ENSDARG00000088330
ENSDARG00000079305
ENSDARG00000089124
ENSDARG00000045143
ENSDARG00000011166
ENSDARG00000012881
ENSDARG00000089475
ENSDARG00000056108
ENSDARG00000028275
ENSDARG00000012388
ENSDARG00000030177
ENSDARG00000079703
ENSDARG00000035560
ENSDARG00000020994
ENSDARG00000091177
ENSDARG00000008541
ENSDARG00000079393
ENSDARG00000062157
ENSDARG00000013576
ENSDARG00000018524
ENSDARG00000012609
ENSDARG00000041566
ENSDARG00000095801
ENSDARG00000095820
ENSDARG00000088536
ENSDARG00000037345
ENSDARG00000006394
ENSDARG00000094104
ENSDARG00000094428
ENSDARG00000058292
ENSDARG00000078283
ENSDARG00000089988
ENSDARG00000040284
ENSDARG00000019507
ENSDARG00000057683
ENSDARG00000015911
ENSDARG00000040041
ENSDARG00000012789
ENSDARG00000004926
ENSDARG00000056374
ENSDARG00000025428
ENSDARG00000013525
ENSDARG00000033735
ENSDARG00000070055
ENSDARG00000077822
ENSDARG00000060622
ENSDARG00000058206
ENSDARG00000026611
ENSDARG00000016607
ENSDARG00000006207
ENSDARG00000005419
ENSDARG00000033587
ENSDARG00000031751
ENSDARG00000077169
ENSDARG00000062788
ENSDARG00000078069
ENSDARG00000016188
ENSDARG00000079839
ENSDARG00000090444
ENSDARG00000074378
ENSDARG00000044694
ENSDARG00000025237
ENSDARG00000055066
ENSDARG00000091111
ENSDARG00000067566
ENSDARG00000042874
ENSDARG00000055831
ENSDARG00000063333
ENSDARG00000062430
ENSDARG00000010487
ENSDARG00000086786
ENSDARG00000036114
ENSDARG00000076718
ENSDARG00000037966
ENSDARG00000035459
ENSDARG00000086703
ENSDARG00000056875
ENSDARG00000059003
ENSDARG00000057180
ENSDARG00000061223
ENSDARG00000057121
ENSDARG00000060041
ENSDARG00000011404
ENSDARG00000002613
ENSDARG00000039208
ENSDARG00000040163
ENSDARG00000029014
ENSDARG00000030756
ENSDARG00000040224
ENSDARG00000029406
ENSDARG00000077620
ENSDARG00000054929
ENSDARG00000026577
ENSDARG00000026225
ENSDARG00000045308
ENSDARG00000077982
ENSDARG00000054155
ENSDARG00000042894
ENSDARG00000027689
ENSDARG00000063285
ENSDARG00000014013
ENSDARG00000068210
ENSDARG00000005058
ENSDARG00000038133
ENSDARG00000012073
ENSDARG00000053133
ENSDARG00000055550
ENSDARG00000015070
ENSDARG00000014685
ENSDARG00000078654
ENSDARG00000090402
ENSDARG00000005454
ENSDARG00000068759
ENSDARG00000070656
ENSDARG00000086988
ENSDARG00000062152
ENSDARG00000052565
ENSDARG00000020887
ENSDARG00000071410
ENSDARG00000007221
ENSDARG00000053479
ENSDARG00000004713
ENSDARG00000014943
ENSDARG00000069917
ENSDARG00000037640
ENSDARG00000087554
ENSDARG00000063385
ENSDARG00000061928
ENSDARG00000005993
ENSDARG00000071442
ENSDARG00000010511
ENSDARG00000074379
ENSDARG00000058471
ENSDARG00000001313
ENSDARG00000060917
ENSDARG00000015460
ENSDARG00000045167
ENSDARG00000038882
ENSDARG00000061468
ENSDARG00000011094
ENSDARG00000028056
ENSDARG00000005462
ENSDARG00000038066
ENSDARG00000086112
ENSDARG00000096554
ENSDARG00000013476
ENSDARG00000041361
ENSDARG00000007971
ENSDARG00000075621
ENSDARG00000001558
ENSDARG00000071694
ENSDARG00000012485
ENSDARG00000086768
ENSDARG00000017744
ENSDARG00000079233
ENSDARG00000044807
ENSDARG00000051923
ENSDARG00000010948
ENSDARG00000077270
ENSDARG00000024488
ENSDARG00000034624
ENSDARG00000052402
ENSDARG00000055133
ENSDARG00000014017
ENSDARG00000088130
ENSDARG00000034773
ENSDARG00000002479
ENSDARG00000033273
ENSDARG00000021086
ENSDARG00000033662
ENSDARG00000076228
ENSDARG00000087515
ENSDARG00000089922
ENSDARG00000057323
ENSDARG00000091031
ENSDARG00000069326
ENSDARG00000042577
ENSDARG00000052666
ENSDARG00000036060
ENSDARG00000020212
ENSDARG00000016044
ENSDARG00000024681
ENSDARG00000077029
ENSDARG00000074183
ENSDARG00000026505
ENSDARG00000076122
ENSDARG00000023526
ENSDARG00000041554
ENSDARG00000014704
ENSDARG00000087740
ENSDARG00000068874
ENSDARG00000015998
ENSDARG00000091926
ENSDARG00000059231
ENSDARG00000021849
ENSDARG00000094438
ENSDARG00000089399
ENSDARG00000031715
ENSDARG00000063076
ENSDARG00000073820
ENSDARG00000019521
ENSDARG00000092653
ENSDARG00000045999
ENSDARG00000012729
ENSDARG00000013771
ENSDARG00000058569
ENSDARG00000044039
ENSDARG00000074487
ENSDARG00000069844
ENSDARG00000053131
ENSDARG00000075045
ENSDARG00000086762
ENSDARG00000077308
ENSDARG00000005481
ENSDARG00000074501
ENSDARG00000062049
ENSDARG00000029803
ENSDARG00000067672
ENSDARG00000094485
ENSDARG00000086947
ENSDARG00000074322
ENSDARG00000016939
ENSDARG00000067797
ENSDARG00000056615
ENSDARG00000058731
ENSDARG00000090730
ENSDARG00000017298
ENSDARG00000090783
ENSDARG00000054543
ENSDARG00000052656
ENSDARG00000093074
ENSDARG00000087084
ENSDARG00000090352
ENSDARG00000027063
ENSDARG00000078734
ENSDARG00000056407
ENSDARG00000076789
ENSDARG00000067711
ENSDARG00000058647
ENSDARG00000088283
ENSDARG00000055901
ENSDARG00000000767
ENSDARG00000074837
ENSDARG00000040080
ENSDARG00000086869
ENSDARG00000089706
ENSDARG00000088745
ENSDARG00000034895
ENSDARG00000019861
ENSDARG00000010255
ENSDARG00000041041
ENSDARG00000074782
ENSDARG00000033227
ENSDARG00000079267
ENSDARG00000095647
ENSDARG00000076144
ENSDARG00000095040
ENSDARG00000058571
ENSDARG00000006468
ENSDARG00000012395
ENSDARG00000016837
ENSDARG00000062025
ENSDARG00000089963
ENSDARG00000091371
ENSDARG00000007889
ENSDARG00000038541
ENSDARG00000037859
ENSDARG00000089990
ENSDARG00000010317
ENSDARG00000090882
ENSDARG00000045561
ENSDARG00000038668
ENSDARG00000026049
ENSDARG00000071648
ENSDARG00000054610
ENSDARG00000055290
ENSDARG00000071437
ENSDARG00000038424
ENSDARG00000075748
ENSDARG00000074283
ENSDARG00000068233
ENSDARG00000090890
ENSDARG00000019763
ENSDARG00000057787
ENSDARG00000004954
ENSDARG00000026350
ENSDARG00000070398
ENSDARG00000095543
ENSDARG00000079387
ENSDARG00000055278
ENSDARG00000034063
ENSDARG00000017834
ENSDARG00000071044
ENSDARG00000059679
ENSDARG00000070669
ENSDARG00000080020
ENSDARG00000007371
ENSDARG00000078814
ENSDARG00000014680
ENSDARG00000087193
ENSDARG00000040076
ENSDARG00000059001
ENSDARG00000086246
ENSDARG00000007823
ENSDARG00000028731
ENSDARG00000005271
ENSDARG00000007241
ENSDARG00000022712
ENSDARG00000058325
ENSDARG00000060498
ENSDARG00000007265
ENSDARG00000091150
ENSDARG00000055753
ENSDARG00000055365
ENSDARG00000018569
ENSDARG00000056047
ENSDARG00000018283
ENSDARG00000031051
ENSDARG00000038321
ENSDARG00000069453
ENSDARG00000069381
ENSDARG00000068784
ENSDARG00000002298
ENSDARG00000013598
ENSDARG00000076189
ENSDARG00000045836
ENSDARG00000060520
ENSDARG00000088040
ENSDARG00000019307
ENSDARG00000043436
ENSDARG00000053592
ENSDARG00000090401
ENSDARG00000093759
ENSDARG00000029321
ENSDARG00000070331
ENSDARG00000052039
ENSDARG00000075697
ENSDARG00000074390
ENSDARG00000052556
ENSDARG00000070622
ENSDARG00000075062
ENSDARG00000058538
ENSDARG00000088912
ENSDARG00000071590
ENSDARG00000095188
ENSDARG00000062632
ENSDARG00000078092
ENSDARG00000063691
ENSDARG00000060471
ENSDARG00000042370
ENSDARG00000078546
ENSDARG00000001557
ENSDARG00000043093
ENSDARG00000069037
ENSDARG00000068735
ENSDARG00000043182
ENSDARG00000061796
ENSDARG00000025465
ENSDARG00000088091
ENSDARG00000094729
ENSDARG00000070492
ENSDARG00000069706
ENSDARG00000038025
ENSDARG00000092281
ENSDARG00000042725
ENSDARG00000090557
ENSDARG00000092598
ENSDARG00000055080
ENSDARG00000063229
ENSDARG00000077728
ENSDARG00000079790
ENSDARG00000077070
ENSDARG00000020128
ENSDARG00000011724
ENSDARG00000086850
ENSDARG00000054026
ENSDARG00000070565
ENSDARG00000045673
ENSDARG00000021794
ENSDARG00000074802
ENSDARG00000070697
ENSDARG00000074451
ENSDARG00000037100
ENSDARG00000070652
ENSDARG00000069143
ENSDARG00000093554
ENSDARG00000037618
ENSDARG00000073721
ENSDARG00000026403
ENSDARG00000017354
ENSDARG00000062000
ENSDARG00000090860
ENSDARG00000013750
ENSDARG00000076532
ENSDARG00000021455
ENSDARG00000074776
ENSDARG00000060862
ENSDARG00000070480
ENSDARG00000062562
ENSDARG00000044125
ENSDARG00000093612
ENSDARG00000044492
ENSDARG00000089286
ENSDARG00000030463
ENSDARG00000062970
ENSDARG00000039512
ENSDARG00000002391
ENSDARG00000067634
ENSDARG00000003216
ENSDARG00000001909
ENSDARG00000075565
ENSDARG00000044975
ENSDARG00000006112
ENSDARG00000017676
ENSDARG00000002235
ENSDARG00000057440
ENSDARG00000009544
ENSDARG00000044982
ENSDARG00000024546
ENSDARG00000009901
ENSDARG00000091699
ENSDARG00000071224
ENSDARG00000069790
ENSDARG00000032575
ENSDARG00000008803
ENSDARG00000034375
ENSDARG00000057644
ENSDARG00000019815
ENSDARG00000039684
ENSDARG00000026964
ENSDARG00000011665
ENSDARG00000020454
ENSDARG00000025826
ENSDARG00000079184
ENSDARG00000004171
ENSDARG00000033616
ENSDARG00000008388
ENSDARG00000078392
ENSDARG00000086230
ENSDARG00000045628
ENSDARG00000056059
ENSDARG00000032868
ENSDARG00000014323
ENSDARG00000035870
ENSDARG00000057099
ENSDARG00000074892
ENSDARG00000062089
ENSDARG00000020377
ENSDARG00000071669
ENSDARG00000052658
ENSDARG00000062552
ENSDARG00000004318
ENSDARG00000033973
ENSDARG00000036546
ENSDARG00000041294
ENSDARG00000052148
ENSDARG00000088805
ENSDARG00000001470
ENSDARG00000059308
ENSDARG00000045367
ENSDARG00000074662
ENSDARG00000040087
ENSDARG00000092499
ENSDARG00000019553
ENSDARG00000069841
ENSDARG00000070012
ENSDARG00000078547
ENSDARG00000069342
ENSDARG00000063079
ENSDARG00000018976
ENSDARG00000010347
ENSDARG00000051887
ENSDARG00000093440
ENSDARG00000089626
ENSDARG00000078247
ENSDARG00000031047
ENSDARG00000093303
ENSDARG00000088521
ENSDARG00000014907
ENSDARG00000033567
ENSDARG00000008884
ENSDARG00000090616
ENSDARG00000030340
ENSDARG00000062171
ENSDARG00000090190
ENSDARG00000059746
ENSDARG00000021488
ENSDARG00000003061
ENSDARG00000075249
ENSDARG00000063147
ENSDARG00000030465
ENSDARG00000033370
ENSDARG00000062707
ENSDARG00000028541
ENSDARG00000010318
ENSDARG00000037997
ENSDARG00000060797
ENSDARG00000087198
ENSDARG00000013250
ENSDARG00000040148
ENSDARG00000055618
ENSDARG00000045676
ENSDARG00000088969
ENSDARG00000070945
ENSDARG00000045155
ENSDARG00000013317
ENSDARG00000070950
ENSDARG00000078254
ENSDARG00000055252
ENSDARG00000074020
ENSDARG00000009336
ENSDARG00000015278
ENSDARG00000077069
ENSDARG00000031136
ENSDARG00000088612
ENSDARG00000056874
ENSDARG00000076480
ENSDARG00000025757
ENSDARG00000093817
ENSDARG00000029058
ENSDARG00000087863
ENSDARG00000077375
ENSDARG00000061520
ENSDARG00000043403
ENSDARG00000013415
ENSDARG00000055889
ENSDARG00000078423
ENSDARG00000088098
ENSDARG00000035253
ENSDARG00000020953
ENSDARG00000095701
ENSDARG00000038505
ENSDARG00000035468
ENSDARG00000070319
ENSDARG00000056795
ENSDARG00000009123
ENSDARG00000053010
ENSDARG00000061941
ENSDARG00000001452
ENSDARG00000015765
ENSDARG00000054911
ENSDARG00000078363
ENSDARG00000088711
ENSDARG00000091058
ENSDARG00000030498
ENSDARG00000089904
ENSDARG00000034042
ENSDARG00000089291
ENSDARG00000055490
ENSDARG00000086654
ENSDARG00000076914
ENSDARG00000056379
ENSDARG00000020192
ENSDARG00000060394
ENSDARG00000001782
ENSDARG00000000690
ENSDARG00000040296
ENSDARG00000032553
ENSDARG00000058992
ENSDARG00000056381
ENSDARG00000057879
ENSDARG00000078041
ENSDARG00000059363
ENSDARG00000053571
ENSDARG00000010792
ENSDARG00000008805
ENSDARG00000024109
ENSDARG00000039008
ENSDARG00000034633
ENSDARG00000015355
ENSDARG00000033909
ENSDARG00000057286
ENSDARG00000039863
ENSDARG00000054304
ENSDARG00000043283
ENSDARG00000074850
ENSDARG00000067723
ENSDARG00000010276
ENSDARG00000091234
ENSDARG00000039232
ENSDARG00000004301
ENSDARG00000020136
ENSDARG00000005673
ENSDARG00000004539
ENSDARG00000042925
ENSDARG00000040700
ENSDARG00000094451
ENSDARG00000035578
ENSDARG00000029865
ENSDARG00000045959
ENSDARG00000031915
ENSDARG00000060927
ENSDARG00000089038
ENSDARG00000004378
ENSDARG00000069044
ENSDARG00000003533
ENSDARG00000096365
ENSDARG00000073813
ENSDARG00000010423
ENSDARG00000074143
ENSDARG00000001781
ENSDARG00000030161
ENSDARG00000014085
ENSDARG00000058820
ENSDARG00000010625
ENSDARG00000078659
ENSDARG00000053561
ENSDARG00000061140
ENSDARG00000042690
ENSDARG00000068217
ENSDARG00000038428
ENSDARG00000045273
ENSDARG00000029443
ENSDARG00000057789
ENSDARG00000075718
ENSDARG00000089511
ENSDARG00000043770
ENSDARG00000011870
ENSDARG00000002509
ENSDARG00000043095
ENSDARG00000075261
ENSDARG00000068303
ENSDARG00000076830
ENSDARG00000000442
ENSDARG00000071082
ENSDARG00000058128
ENSDARG00000034358
ENSDARG00000024831
ENSDARG00000057113
ENSDARG00000019601
ENSDARG00000057911
ENSDARG00000044074
ENSDARG00000007344
ENSDARG00000068369
ENSDARG00000089769
ENSDARG00000027087
ENSDARG00000036028
ENSDARG00000069888
ENSDARG00000019808
ENSDARG00000016981
ENSDARG00000010085
ENSDARG00000056122
ENSDARG00000074503
ENSDARG00000029738
ENSDARG00000079399
ENSDARG00000030357
ENSDARG00000058160
ENSDARG00000042816
ENSDARG00000079066
ENSDARG00000063430
ENSDARG00000095533
ENSDARG00000037861
ENSDARG00000068382
ENSDARG00000005273
ENSDARG00000091078
ENSDARG00000043360
ENSDARG00000095213
ENSDARG00000044405
ENSDARG00000030972
ENSDARG00000031533
ENSDARG00000023958
ENSDARG00000074533
ENSDARG00000095019
ENSDARG00000061407
ENSDARG00000052387
ENSDARG00000088304
ENSDARG00000041062
ENSDARG00000059792
ENSDARG00000078432
ENSDARG00000015072
ENSDARG00000058606
ENSDARG00000077588
ENSDARG00000019274
ENSDARG00000068851
ENSDARG00000035506
ENSDARG00000077768
ENSDARG00000056639
ENSDARG00000076848
ENSDARG00000030881
ENSDARG00000053467
ENSDARG00000086795
ENSDARG00000074425
ENSDARG00000070355
ENSDARG00000006074
ENSDARG00000014047
ENSDARG00000016830
ENSDARG00000028252
ENSDARG00000074356
ENSDARG00000079372
ENSDARG00000017339
ENSDARG00000037008
ENSDARG00000078404
ENSDARG00000039499
ENSDARG00000018984
ENSDARG00000037943
ENSDARG00000061845
ENSDARG00000078217
ENSDARG00000037804
ENSDARG00000091419
ENSDARG00000056638
ENSDARG00000007383
ENSDARG00000004311
ENSDARG00000075881
ENSDARG00000076703
ENSDARG00000003963
ENSDARG00000020838
ENSDARG00000093120
ENSDARG00000056099
ENSDARG00000037556
ENSDARG00000041723
ENSDARG00000030367
ENSDARG00000007990
ENSDARG00000074319
ENSDARG00000060094
ENSDARG00000016364
ENSDARG00000024116
ENSDARG00000042984
ENSDARG00000007099
ENSDARG00000029419
ENSDARG00000040717
ENSDARG00000063704
ENSDARG00000022213
ENSDARG00000004497
ENSDARG00000034187
ENSDARG00000042545
ENSDARG00000089131
ENSDARG00000058342
ENSDARG00000039264
ENSDARG00000070913
ENSDARG00000031317
ENSDARG00000039608
ENSDARG00000004588
ENSDARG00000068567
ENSDARG00000013839
ENSDARG00000095743
ENSDARG00000035791
ENSDARG00000070413
ENSDARG00000040543
ENSDARG00000040266
ENSDARG00000094405
ENSDARG00000008423
ENSDARG00000071235
ENSDARG00000061351
ENSDARG00000035770
ENSDARG00000031775
ENSDARG00000037199
ENSDARG00000015252
ENSDARG00000042329
ENSDARG00000087332
ENSDARG00000056778
ENSDARG00000015947
ENSDARG00000020978
ENSDARG00000052905
ENSDARG00000088655
ENSDARG00000004748
ENSDARG00000037845
ENSDARG00000030449
ENSDARG00000026165
ENSDARG00000034211
ENSDARG00000025403
ENSDARG00000089444
ENSDARG00000021787
ENSDARG00000076361
ENSDARG00000043128
ENSDARG00000061391
ENSDARG00000060435
ENSDARG00000095434
ENSDARG00000017213
ENSDARG00000035555
ENSDARG00000088268
ENSDARG00000032242
ENSDARG00000055518
ENSDARG00000057027
ENSDARG00000086647
ENSDARG00000051975
ENSDARG00000075854
ENSDARG00000078138
ENSDARG00000008170
ENSDARG00000056087
ENSDARG00000030215
ENSDARG00000058179
ENSDARG00000069988
ENSDARG00000074156
ENSDARG00000092872
ENSDARG00000021866
ENSDARG00000093584
ENSDARG00000006899
ENSDARG00000038792
ENSDARG00000043242
ENSDARG00000034409
ENSDARG00000017799
ENSDARG00000009018
ENSDARG00000016526
ENSDARG00000031894
ENSDARG00000014496
ENSDARG00000007407
ENSDARG00000077953
ENSDARG00000042296
ENSDARG00000040628
ENSDARG00000004658
ENSDARG00000009550
ENSDARG00000045413
ENSDARG00000089489
ENSDARG00000068503
ENSDARG00000056499
ENSDARG00000040606
ENSDARG00000059279
ENSDARG00000091660
ENSDARG00000095400
ENSDARG00000045887
ENSDARG00000040944
ENSDARG00000009867
ENSDARG00000036382
ENSDARG00000068409
ENSDARG00000078072
ENSDARG00000086874
ENSDARG00000052115
ENSDARG00000040534
ENSDARG00000003091
ENSDARG00000038639
ENSDARG00000058800
ENSDARG00000077021
ENSDARG00000037266
ENSDARG00000035309
ENSDARG00000030157
ENSDARG00000044276
ENSDARG00000040917
ENSDARG00000036893
ENSDARG00000043442
ENSDARG00000060682
ENSDARG00000077121
ENSDARG00000037393
ENSDARG00000003808
ENSDARG00000069279
ENSDARG00000088373
ENSDARG00000070702
ENSDARG00000056680
ENSDARG00000018159
ENSDARG00000009196
ENSDARG00000022615
ENSDARG00000041947
ENSDARG00000057726
ENSDARG00000033544
ENSDARG00000005785
ENSDARG00000093494
ENSDARG00000043133
ENSDARG00000005541
ENSDARG00000029290
ENSDARG00000028096
ENSDARG00000014594
ENSDARG00000020031
ENSDARG00000044776
ENSDARG00000077419
ENSDARG00000025254
ENSDARG00000076833
ENSDARG00000012972
ENSDARG00000006422
ENSDARG00000070434
ENSDARG00000044261
ENSDARG00000055715
ENSDARG00000024492
ENSDARG00000044356
ENSDARG00000055398
ENSDARG00000034117
ENSDARG00000058980
ENSDARG00000087093
ENSDARG00000040046
ENSDARG00000077641
ENSDARG00000088432
ENSDARG00000054451
ENSDARG00000043349
ENSDARG00000056836
ENSDARG00000035198
ENSDARG00000008732
ENSDARG00000019117
ENSDARG00000054616
ENSDARG00000019235
ENSDARG00000092143
ENSDARG00000079497
ENSDARG00000035178
ENSDARG00000025670
ENSDARG00000040100
ENSDARG00000015263
ENSDARG00000070746
ENSDARG00000045947
ENSDARG00000039164
ENSDARG00000022817
ENSDARG00000055926
ENSDARG00000090156
ENSDARG00000054906
ENSDARG00000054814
ENSDARG00000067984
ENSDARG00000096270
ENSDARG00000078552
ENSDARG00000053569
ENSDARG00000068892
ENSDARG00000051873
ENSDARG00000017121
ENSDARG00000054749
ENSDARG00000042004
ENSDARG00000079996
ENSDARG00000017554
ENSDARG00000094760
ENSDARG00000039949
ENSDARG00000042707
ENSDARG00000057138
ENSDARG00000015546
ENSDARG00000088636
ENSDARG00000041119
ENSDARG00000024560
ENSDARG00000044169
ENSDARG00000043802
ENSDARG00000015557
ENSDARG00000046148
ENSDARG00000056535
ENSDARG00000021318
ENSDARG00000005651
ENSDARG00000039777
ENSDARG00000087136
ENSDARG00000083189
ENSDARG00000089322
ENSDARG00000019335
ENSDARG00000094840
ENSDARG00000037334
ENSDARG00000078865
ENSDARG00000093754
ENSDARG00000094088
ENSDARG00000078741
ENSDARG00000079059
ENSDARG00000088885
ENSDARG00000076096
ENSDARG00000092383
ENSDARG00000004840
ENSDARG00000029866
ENSDARG00000021013
ENSDARG00000037432
ENSDARG00000062487
ENSDARG00000070315
ENSDARG00000052322
ENSDARG00000017835
ENSDARG00000018298
ENSDARG00000017860
ENSDARG00000015559
ENSDARG00000071491
ENSDARG00000040178
ENSDARG00000035768
ENSDARG00000069909
ENSDARG00000045548
ENSDARG00000069089
ENSDARG00000044404
ENSDARG00000088555
ENSDARG00000093124
ENSDARG00000057841
ENSDARG00000052072
ENSDARG00000079049
ENSDARG00000034855
ENSDARG00000077975
ENSDARG00000081218
ENSDARG00000003523
ENSDARG00000078522
ENSDARG00000044491
ENSDARG00000087440
ENSDARG00000095215
ENSDARG00000091116
ENSDARG00000054753
ENSDARG00000053481
ENSDARG00000038056
ENSDARG00000091273
ENSDARG00000090416
ENSDARG00000002259
ENSDARG00000059061
ENSDARG00000089577
ENSDARG00000003203
ENSDARG00000011956
ENSDARG00000078266
ENSDARG00000070050
ENSDARG00000002732
ENSDARG00000005485
ENSDARG00000073699
ENSDARG00000011407
ENSDARG00000063631
ENSDARG00000045958
ENSDARG00000019342
ENSDARG00000013930
ENSDARG00000010472
ENSDARG00000014179
ENSDARG00000068888
ENSDARG00000025891
ENSDARG00000053207
ENSDARG00000038716
ENSDARG00000095002
ENSDARG00000096616
ENSDARG00000078674
ENSDARG00000010478
ENSDARG00000039131
ENSDARG00000042172
ENSDARG00000002589
ENSDARG00000056950
ENSDARG00000088589
ENSDARG00000089838
ENSDARG00000075027
ENSDARG00000070873
ENSDARG00000086724
ENSDARG00000041433
ENSDARG00000017127
ENSDARG00000015654
ENSDARG00000039381
ENSDARG00000040838
ENSDARG00000053761
ENSDARG00000033683
ENSDARG00000029995
ENSDARG00000075993
ENSDARG00000002768
ENSDARG00000077369
ENSDARG00000089850
ENSDARG00000075441
ENSDARG00000077236
ENSDARG00000005139
ENSDARG00000006982
ENSDARG00000036671
ENSDARG00000095217
ENSDARG00000007891
ENSDARG00000043936
ENSDARG00000092283
ENSDARG00000056767
ENSDARG00000037537
ENSDARG00000035018
ENSDARG00000037789
ENSDARG00000042027
ENSDARG00000073814
ENSDARG00000030896
ENSDARG00000030402
ENSDARG00000071173
ENSDARG00000060439
ENSDARG00000014673
ENSDARG00000020072
ENSDARG00000059073
ENSDARG00000027852
ENSDARG00000053829
ENSDARG00000079266
ENSDARG00000039929
ENSDARG00000033971
ENSDARG00000012381
ENSDARG00000040045
ENSDARG00000058656
ENSDARG00000008723
ENSDARG00000008772
ENSDARG00000037539
ENSDARG00000037116
ENSDARG00000070835
ENSDARG00000096257
ENSDARG00000071433
ENSDARG00000042245
ENSDARG00000035891
ENSDARG00000044895
ENSDARG00000044132
ENSDARG00000062592
ENSDARG00000045822
ENSDARG00000071877
ENSDARG00000052437
ENSDARG00000020594
ENSDARG00000075433
ENSDARG00000026473
ENSDARG00000034470
ENSDARG00000002204
ENSDARG00000070597
ENSDARG00000009280
ENSDARG00000005749
ENSDARG00000024433
ENSDARG00000030638
ENSDARG00000018105
ENSDARG00000003081
ENSDARG00000022807
ENSDARG00000040565
ENSDARG00000035327
ENSDARG00000020574
ENSDARG00000091099
ENSDARG00000090514
ENSDARG00000067995
ENSDARG00000090268
ENSDARG00000039099
ENSDARG00000029069
ENSDARG00000067990
ENSDARG00000089086
ENSDARG00000010294
ENSDARG00000046021
ENSDARG00000030778
ENSDARG00000079255
ENSDARG00000070132
ENSDARG00000078731
ENSDARG00000059263
ENSDARG00000095322
ENSDARG00000044265
ENSDARG00000041220
ENSDARG00000032116
ENSDARG00000043301
ENSDARG00000035607
ENSDARG00000013025
ENSDARG00000058679
ENSDARG00000041394
ENSDARG00000091650
ENSDARG00000045416
ENSDARG00000019949
ENSDARG00000041237
ENSDARG00000070109
ENSDARG00000043137
ENSDARG00000045142
ENSDARG00000007025
ENSDARG00000021046
ENSDARG00000029544
ENSDARG00000075654
ENSDARG00000042332
ENSDARG00000088371
ENSDARG00000036767
ENSDARG00000091860
ENSDARG00000088539

## Sheet: Sup. Table S4 Gene list vi
Supplemental Table S4: Ensembl Gene IDs from differential zebrafish gene lists (related to Fig. 2 and Supplemental Fig.3)
Supplemental Fig. S3D: Gene List vi
Gene_ID
ENSDARG00000088539
ENSDARG00000087143
ENSDARG00000015543
ENSDARG00000012552
ENSDARG00000079361
ENSDARG00000032951
ENSDARG00000074250
ENSDARG00000061621
ENSDARG00000006687
ENSDARG00000090477
ENSDARG00000087855
ENSDARG00000092233
ENSDARG00000033999
ENSDARG00000061256
ENSDARG00000091754
ENSDARG00000057338
ENSDARG00000093108
ENSDARG00000077549
ENSDARG00000090132
ENSDARG00000007294
ENSDARG00000002362
ENSDARG00000033364
ENSDARG00000045261
ENSDARG00000071448
ENSDARG00000086793
ENSDARG00000071707
ENSDARG00000044010
ENSDARG00000070173
ENSDARG00000077405
ENSDARG00000022303
ENSDARG00000075086
ENSDARG00000021059
ENSDARG00000058322
ENSDARG00000045814
ENSDARG00000070230
ENSDARG00000069190
ENSDARG00000091834
ENSDARG00000076178
ENSDARG00000062664
ENSDARG00000094057
ENSDARG00000089441
ENSDARG00000043510
ENSDARG00000041895
ENSDARG00000053215
ENSDARG00000075544
ENSDARG00000071579
ENSDARG00000031598
ENSDARG00000079938
ENSDARG00000029066
ENSDARG00000078550
ENSDARG00000035852
ENSDARG00000078366
ENSDARG00000031890
ENSDARG00000034457
ENSDARG00000086261
ENSDARG00000034058
ENSDARG00000051762
ENSDARG00000052898
ENSDARG00000007836
ENSDARG00000024540
ENSDARG00000033443
ENSDARG00000004037
ENSDARG00000093198
ENSDARG00000010823
ENSDARG00000033539
ENSDARG00000029372
ENSDARG00000079486
ENSDARG00000032564
ENSDARG00000075192
ENSDARG00000021647
ENSDARG00000043705
ENSDARG00000038557
ENSDARG00000016412
ENSDARG00000068128
ENSDARG00000091871
ENSDARG00000088951
ENSDARG00000036147
ENSDARG00000045482
ENSDARG00000079727
ENSDARG00000002917
ENSDARG00000029493
ENSDARG00000038352
ENSDARG00000093019
ENSDARG00000061660
ENSDARG00000070498
ENSDARG00000002549
ENSDARG00000086961
ENSDARG00000033380
ENSDARG00000068477
ENSDARG00000091061
ENSDARG00000070402
ENSDARG00000092332
ENSDARG00000005821
ENSDARG00000078882
ENSDARG00000090738
ENSDARG00000016396
ENSDARG00000007377
ENSDARG00000018980
ENSDARG00000058734
ENSDARG00000056653
ENSDARG00000071567
ENSDARG00000004160
ENSDARG00000016733
ENSDARG00000077760
ENSDARG00000061123
ENSDARG00000062271
ENSDARG00000003041
ENSDARG00000020642
ENSDARG00000075975
ENSDARG00000015343
ENSDARG00000056347
ENSDARG00000010246
ENSDARG00000015228
ENSDARG00000044097
ENSDARG00000090752
ENSDARG00000005023
ENSDARG00000040482
ENSDARG00000041065
ENSDARG00000087017
ENSDARG00000058738
ENSDARG00000074321
ENSDARG00000056160
ENSDARG00000003035
ENSDARG00000092337
ENSDARG00000061794
ENSDARG00000078854
ENSDARG00000088985
ENSDARG00000089680
ENSDARG00000075385
ENSDARG00000079725
ENSDARG00000068219
ENSDARG00000054251
ENSDARG00000044134
ENSDARG00000015921
ENSDARG00000059815
ENSDARG00000043638
ENSDARG00000055093
ENSDARG00000091533
ENSDARG00000059234
ENSDARG00000077573
ENSDARG00000067857
ENSDARG00000004402
ENSDARG00000078466
ENSDARG00000076021
ENSDARG00000077372
ENSDARG00000073952
ENSDARG00000060189
ENSDARG00000014871
ENSDARG00000058784
ENSDARG00000053358
ENSDARG00000071065
ENSDARG00000056091
ENSDARG00000041874
ENSDARG00000075707
ENSDARG00000074749
ENSDARG00000087196
ENSDARG00000071212
ENSDARG00000077217
ENSDARG00000015576
ENSDARG00000040907
ENSDARG00000039750
ENSDARG00000037403
ENSDARG00000044575
ENSDARG00000089393
ENSDARG00000036058
ENSDARG00000033140
ENSDARG00000024537
ENSDARG00000071353
ENSDARG00000051957
ENSDARG00000030514
ENSDARG00000031651
ENSDARG00000055731
ENSDARG00000068996
ENSDARG00000037012
ENSDARG00000025012
ENSDARG00000036848
ENSDARG00000074466
ENSDARG00000004621
ENSDARG00000031709
ENSDARG00000002533
ENSDARG00000005161
ENSDARG00000089936
ENSDARG00000071672
ENSDARG00000091771
ENSDARG00000091571
ENSDARG00000019236
ENSDARG00000062799
ENSDARG00000075416
ENSDARG00000073761
ENSDARG00000087889
ENSDARG00000039752
ENSDARG00000093048
ENSDARG00000028012
ENSDARG00000089831
ENSDARG00000079584
ENSDARG00000062008
ENSDARG00000096037
ENSDARG00000016864
ENSDARG00000014004
ENSDARG00000045708
ENSDARG00000079056
ENSDARG00000087331
ENSDARG00000076416
ENSDARG00000005780
ENSDARG00000016238
ENSDARG00000060494
ENSDARG00000095983
ENSDARG00000070961
ENSDARG00000092460
ENSDARG00000043973
ENSDARG00000096603
ENSDARG00000062109
ENSDARG00000015349
ENSDARG00000040291
ENSDARG00000006837
ENSDARG00000015790
ENSDARG00000037837
ENSDARG00000077424
ENSDARG00000007753
ENSDARG00000016304
ENSDARG00000013928
ENSDARG00000014891
ENSDARG00000058984
ENSDARG00000095698
ENSDARG00000001953
ENSDARG00000044688
ENSDARG00000058366
ENSDARG00000039452
ENSDARG00000077385
ENSDARG00000034173
ENSDARG00000045586
ENSDARG00000035858
ENSDARG00000058323
ENSDARG00000036967
ENSDARG00000004018
ENSDARG00000017034
ENSDARG00000035985
ENSDARG00000037628
ENSDARG00000068096
ENSDARG00000063711
ENSDARG00000079296
ENSDARG00000022424
ENSDARG00000007412
ENSDARG00000012671
ENSDARG00000000551
ENSDARG00000060763
ENSDARG00000035577
ENSDARG00000042732
ENSDARG00000022456
ENSDARG00000039914
ENSDARG00000035563
ENSDARG00000045051
ENSDARG00000023267
ENSDARG00000020857
ENSDARG00000079440
ENSDARG00000008359
ENSDARG00000006598
ENSDARG00000092856
ENSDARG00000014859
ENSDARG00000002217
ENSDARG00000052789
ENSDARG00000087483
ENSDARG00000026406
ENSDARG00000043342
ENSDARG00000037186
ENSDARG00000068275
ENSDARG00000010738
ENSDARG00000032626
ENSDARG00000039997
ENSDARG00000007665
ENSDARG00000041428
ENSDARG00000028173
ENSDARG00000075121
ENSDARG00000089543
ENSDARG00000074363
ENSDARG00000061099
ENSDARG00000007347
ENSDARG00000016093
ENSDARG00000016200
ENSDARG00000037746
ENSDARG00000016753
ENSDARG00000032859
ENSDARG00000071219
ENSDARG00000009262
ENSDARG00000004059
ENSDARG00000014041
ENSDARG00000071674
ENSDARG00000044220
ENSDARG00000012586
ENSDARG00000031795
ENSDARG00000037261
ENSDARG00000079046
ENSDARG00000040161
ENSDARG00000016999
ENSDARG00000035559
ENSDARG00000039399
ENSDARG00000059805
ENSDARG00000022730
ENSDARG00000094045
ENSDARG00000090186
ENSDARG00000022461
ENSDARG00000061368
ENSDARG00000044191
ENSDARG00000042221
ENSDARG00000031240
ENSDARG00000071865
ENSDARG00000013087
ENSDARG00000053652
ENSDARG00000078803
ENSDARG00000053448
ENSDARG00000077643
ENSDARG00000078875
ENSDARG00000031588
ENSDARG00000030472
ENSDARG00000043806
ENSDARG00000054058
ENSDARG00000094439
ENSDARG00000092452
ENSDARG00000070165
ENSDARG00000068088
ENSDARG00000090202
ENSDARG00000086047
ENSDARG00000075821
ENSDARG00000070171
ENSDARG00000096147
ENSDARG00000069379
ENSDARG00000059795
ENSDARG00000056603
ENSDARG00000055229
ENSDARG00000035663
ENSDARG00000020798
ENSDARG00000004845
ENSDARG00000034396
ENSDARG00000086202
ENSDARG00000096378
ENSDARG00000091503
ENSDARG00000007916
ENSDARG00000001873
ENSDARG00000043608
ENSDARG00000077402
ENSDARG00000060569
ENSDARG00000039004
ENSDARG00000057403
ENSDARG00000078525
ENSDARG00000041609
ENSDARG00000078683
ENSDARG00000074126
ENSDARG00000034429
ENSDARG00000014165
ENSDARG00000040707
ENSDARG00000063224
ENSDARG00000079483
ENSDARG00000074634
ENSDARG00000073862
ENSDARG00000087262
ENSDARG00000090065
ENSDARG00000088038
ENSDARG00000031345
ENSDARG00000038131
ENSDARG00000089236
ENSDARG00000087341
ENSDARG00000088744
ENSDARG00000091601
ENSDARG00000070584
ENSDARG00000095767
ENSDARG00000079997
ENSDARG00000003313
ENSDARG00000038559
ENSDARG00000054454
ENSDARG00000074394
ENSDARG00000023822
ENSDARG00000090320
ENSDARG00000086260
ENSDARG00000028000
ENSDARG00000019702
ENSDARG00000003933
ENSDARG00000086274
ENSDARG00000061196
ENSDARG00000005039
ENSDARG00000091528
ENSDARG00000010207
ENSDARG00000025299
ENSDARG00000012366
ENSDARG00000057887
ENSDARG00000030914
ENSDARG00000045064
ENSDARG00000091245
ENSDARG00000014947
ENSDARG00000078797
ENSDARG00000005126
ENSDARG00000076744
ENSDARG00000095179
ENSDARG00000073744
ENSDARG00000015601
ENSDARG00000078117
ENSDARG00000062135
ENSDARG00000029075
ENSDARG00000088793
ENSDARG00000089041
ENSDARG00000027472
ENSDARG00000090624
ENSDARG00000031426
ENSDARG00000045955
ENSDARG00000012137
ENSDARG00000022254
ENSDARG00000092786
ENSDARG00000024746
ENSDARG00000006092
ENSDARG00000028367
ENSDARG00000005944
ENSDARG00000030094
ENSDARG00000075524
ENSDARG00000077845
ENSDARG00000056252
ENSDARG00000036612
ENSDARG00000068963
ENSDARG00000095608
ENSDARG00000045014
ENSDARG00000079308
ENSDARG00000013295
ENSDARG00000030547
ENSDARG00000043993
ENSDARG00000009961
ENSDARG00000079155
ENSDARG00000043294
ENSDARG00000056376
ENSDARG00000002988
ENSDARG00000040306
ENSDARG00000041292
ENSDARG00000070061
ENSDARG00000056453
ENSDARG00000055644
ENSDARG00000014805
ENSDARG00000061543
ENSDARG00000038378
ENSDARG00000089625
ENSDARG00000026137
ENSDARG00000077559
ENSDARG00000035602
ENSDARG00000071601
ENSDARG00000074833
ENSDARG00000039266
ENSDARG00000008403
ENSDARG00000091847
ENSDARG00000068621
ENSDARG00000087178
ENSDARG00000074476
ENSDARG00000092730
ENSDARG00000094910
ENSDARG00000068431
ENSDARG00000024877
ENSDARG00000055589
ENSDARG00000045837
ENSDARG00000036773
ENSDARG00000052779
ENSDARG00000069415
ENSDARG00000094708
ENSDARG00000092243
ENSDARG00000055439
ENSDARG00000079302
ENSDARG00000088514
ENSDARG00000090467
ENSDARG00000039462
ENSDARG00000056873
ENSDARG00000067652
ENSDARG00000058658
ENSDARG00000090729
ENSDARG00000076858
ENSDARG00000038095
ENSDARG00000077026
ENSDARG00000071622
ENSDARG00000091085
ENSDARG00000044098
ENSDARG00000062156
ENSDARG00000095147
ENSDARG00000012776
ENSDARG00000089429
ENSDARG00000028824
ENSDARG00000033832
ENSDARG00000089083
