# Supplementary material for: Microbiota regulate intestinal epithelial gene expression by suppressing the transcription factor Hepatocyte nuclear factor 4 alpha
Source: Genome Res. 2017 Jul;27(7):1195–206. doi: 10.1101/gr.220111.116 (PMC5495071; doi:10.1101/gr.220111.116)
Supplement: Supplemental Material [file supp_gr.220111.116_Supplemental_Table_S6.xlsx]

## Sheet: Sup. Table S6 GF DHS Genes
Supplemental Table S6: Genes associated with differential DHS sites (p < 0.01) (related to Supplemental Fig. S4)
Genes associated with DHS site suppressed by the microbiota							Association rule: Single nearest gene: 10000 bp max extension, curated regulatory domains included
Gene Name	Peak Locations relative to TSS
1700022P22Rik	unnamed (+6578), unnamed (+6666)
Ccl20	unnamed (+7487), unnamed (+7515)
Cdk5rap3	unnamed (-2702)
Cic	unnamed (-273)
Ctf2	unnamed (-4454)
Cxcl17	unnamed (+1505), unnamed (+1633)
Cym	unnamed (+2986)
Ddc	unnamed (-3838)
Fam133b	unnamed (+2705)
Fam46a	unnamed (-7153)
Flywch1	unnamed (+5426), unnamed (+5458)
Foxn3	unnamed (-1508)
Fuca2	unnamed (-6907), unnamed (-6732)
Gm9747	unnamed (+6520)
Hmgn1	unnamed (+885)
Krt8	unnamed (-1181)
L2hgdh	unnamed (+2304)
Lypd8	unnamed (+8531)
Nrp2	unnamed (+2785)
Scarb2	unnamed (-6653)
Thrsp	unnamed (-9027), unnamed (-6167)
Tnfrsf25	unnamed (-8369), unnamed (-8301)
Ubb	unnamed (+8041)
Ube2f	unnamed (-9243)

## Sheet: Sup. Table S6 CV DHS Genes
Supplemental Table S6: Genes associated with differential DHS sites (p < 0.01) (related to Supplemental Fig. S4)
Genes associated with DHS site induced by the microbiota							Association rule: Single nearest gene: 10000 bp max extension, curated regulatory domains included
Gene Name	Peak Locations relative to TSS
2010111I01Rik	unnamed (-4796)
2810407A14Rik	unnamed (+6587), unnamed (+6619)
4930474N05Rik	unnamed (+382)
4931408C20Rik	unnamed (+1328)
5031414D18Rik	unnamed (-5583)
5430435G22Rik	unnamed (+1861)
6330444E15Rik	unnamed (-3031)
AI314180	unnamed (+154)
Acap1	unnamed (+691)
Ace3	unnamed (-4265)
Acrbp	unnamed (-3098), unnamed (-3048)
Adamts5	unnamed (-9594)
Aen	unnamed (-5110), unnamed (-5093)
Aknad1	unnamed (-1725), unnamed (-1709)
Akr1b8	unnamed (-3637), unnamed (-3553)
Alx1	unnamed (-62)
Ankrd10	unnamed (-7639), unnamed (-7529)
Ankrd2	unnamed (-729)
Arid2	unnamed (-850)
Armcx6	unnamed (-743)
Atp6v0a1	unnamed (-1230), unnamed (-1138)
B3gnt7	unnamed (+6150), unnamed (+6216)
BC094916	unnamed (-3392)
Batf2	unnamed (-7096)
Bcl9	unnamed (-5207)
Bpi	unnamed (-9619), unnamed (-9588)
Bsph1	unnamed (+4426)
Calcr	unnamed (-354)
Capn2	unnamed (-2702)
Capsl	unnamed (-232)
Cast	unnamed (-5240)
Cd69	unnamed (-9185), unnamed (-9168)
Cdh26	unnamed (+3545)
Chst14	unnamed (+7459)
Col16a1	unnamed (+8089)
Cpsf2	unnamed (-209)
Csn2	unnamed (-4641)
Ctnnd2	unnamed (+807)
Cyp2c68	unnamed (-55)
Cyp39a1	unnamed (+8012)
D130052B06Rik	unnamed (+4169)
Dct	unnamed (-6454)
Ddx26b	unnamed (+4331), unnamed (+4392)
Depdc7	unnamed (-550), unnamed (-350)
Diap2	unnamed (+7360)
Dio3	unnamed (-960), unnamed (-820), unnamed (-84)
Dkkl1	unnamed (-264)
Dnajc16	unnamed (+7708)
Drc1	unnamed (+6220)
Ehd3	unnamed (+3)
Elk3	unnamed (+236)
Evc2	unnamed (-8925121)
Fam217b	unnamed (+230)
Fry	unnamed (+5277)
Fut2	unnamed (-3662)
Gabra2	unnamed (-104)
Gata6	unnamed (-4998), unnamed (-4956)
Gdf11	unnamed (-113)
Gdf5	unnamed (-1079)
Gm10053	unnamed (+1586)
Gm10092	unnamed (+4870), unnamed (+4967)
Gm10352	unnamed (+6135), unnamed (+6950), unnamed (+7092)
Gm46	unnamed (+6016)
Gm4782	unnamed (+9837)
Gm4868	unnamed (+7633)
Gm5591	unnamed (-1712)
Gm6614	unnamed (+7253)
Gorasp2	unnamed (-216)
Gpr22	unnamed (-5134)
Hbb-b2	unnamed (-1154), unnamed (-1070)
Heca	unnamed (+234), unnamed (+777)
Herc6	unnamed (+485)
Hk2	unnamed (-2691)
Hoxa11	unnamed (-7311)
Hoxa4	unnamed (+200), unnamed (+739), unnamed (+760)
Hoxb2	unnamed (-5230)
Hrk	unnamed (+2524)
Ica1	unnamed (-16)
Ifi44	unnamed (-3459), unnamed (-47)
Ikzf4	unnamed (-9681)
Inhbc	unnamed (+2630)
Iqgap2	unnamed (+1014)
Itga5	unnamed (+788)
Kat6a	unnamed (+45)
Kcnk15	unnamed (+3794)
Kif16b	unnamed (-121)
Kif21a	unnamed (+5351)
Kirrel3	unnamed (+2404), unnamed (+2574)
Klk6	unnamed (-4771)
Klk8	unnamed (+536)
Lrch1	unnamed (+322), unnamed (+7603)
Lrrc37a	unnamed (+4759)
Lypla1	unnamed (+1044), unnamed (+1104)
Lyzl4	unnamed (+102)
Mcc	unnamed (-822)
Mfn2	unnamed (-57)
Mrgprf	unnamed (-261)
Msantd4	unnamed (-7833)
Mtnr1a	unnamed (-5658)
Myo5c	unnamed (+2258)
Nanog	unnamed (-4545)
Nav1	unnamed (-174)
Ndrg2	unnamed (+491)
Nid1	unnamed (-8421)
Nkain2	unnamed (+575)
Nkx2-3	unnamed (+4187)
Nlrp1b	unnamed (-1731)
Npepps	unnamed (-9008), unnamed (-8991)
Nudt4	unnamed (+6784), unnamed (+6841)
Oas1f	unnamed (-9715)
Olfr183	unnamed (-6951)
Olfr283	unnamed (+7644)
Olfr384	unnamed (+2345)
Olfr513	unnamed (-4934792), unnamed (-4934708)
Olfr631	unnamed (+3677)
Olfr652	unnamed (-3348)
Olfr826	unnamed (-5806)
Olfr91	unnamed (-5458)
Olfr948	unnamed (-8672)
Olig3	unnamed (+5657), unnamed (+5740)
Ost4	unnamed (-1728)
Pcdh17	unnamed (-197), unnamed (-35)
Pdzrn3	unnamed (+1137)
Pecam1	unnamed (+7947)
Phldb1	unnamed (+357)
Pon2	unnamed (-7275)
Pou4f3	unnamed (+1726)
Ppm1h	unnamed (+1898)
Prr18	unnamed (+2530)
Prss32	unnamed (+4558)
Pvrl2	unnamed (+2199)
Rab11fip4	unnamed (+335)
Rarres2	unnamed (+6522), unnamed (+6550)
Rasip1	unnamed (+1557)
Rbmy	unnamed (+9254)
Rgs9	unnamed (+8573)
Rgsl1	unnamed (-2948)
Ros1	unnamed (-494)
Rsrc1	unnamed (+12)
Rtn4rl2	unnamed (-2129)
Sall4	unnamed (+1308)
Sbk1	unnamed (-6488)
Scarb1	unnamed (+7)
Sec14l4	unnamed (-6083)
Sft2d3	unnamed (-6655)
Shcbp1	unnamed (-124), unnamed (+22)
Sik1	unnamed (-311), unnamed (-139)
Slc16a6	unnamed (+3252)
Slc26a7	unnamed (+666)
Slc47a2	unnamed (+352), unnamed (+513)
Smim8	unnamed (-7313), unnamed (-7274)
Smurf1	unnamed (-67), unnamed (+133)
Sox8	unnamed (+2694)
Sp100	unnamed (+9525), unnamed (+9562)
Spag16	unnamed (+5358)
Ssbp2	unnamed (-110)
Sv2c	unnamed (-100), unnamed (-23)
Tec	unnamed (-8321), unnamed (-8249)
Tmem145	unnamed (+430)
Tmem215	unnamed (+1303)
Tnfsf8	unnamed (+6206)
Tpcn1	unnamed (+2039)
Trim29	unnamed (-76), unnamed (+58)
Tsc22d4	unnamed (+1104)
Tyw1	unnamed (-106), unnamed (+71)
Ubald1	unnamed (+1961)
Uncx	unnamed (-47)
Upp1	unnamed (-1001), unnamed (-877)
Usp17le	unnamed (+679), unnamed (+708)
Vtcn1	unnamed (-76)
Vwc2	unnamed (+701)
Wdr75	unnamed (-150)
Yeats4	unnamed (+7105)
Zbp1	unnamed (-127)
Zfp236	unnamed (-86), unnamed (+714)
Zfp458	unnamed (-9488), unnamed (-9407)
Zfp786	unnamed (+150)
Zkscan1	unnamed (-9363)
Zp2	unnamed (+2323)

## Sheet: Sup. Table S6 GF H3K4me1 Genes
Supplemental Table S6: Genes associated with differential H3K4me1 sites (FDR < 0.01) (related to Fig. 3)
Genes associated with H3K4me1 regions suppressed by the microbiota							Association rule: Single nearest gene: 10000 bp max extension, curated regulatory domains included
Gene Name	Peak Locations relative to TSS
Tifa	unnamed (-1121), unnamed (-921), unnamed (-721), unnamed (-521), unnamed (-321), unnamed (-121), unnamed (+79), unnamed (+618), unnamed (+818), unnamed (+1018)
Slc16a6	unnamed (+410), unnamed (+610), unnamed (+810), unnamed (+1010), unnamed (+1210), unnamed (+1410), unnamed (+1610), unnamed (+1810), unnamed (+2010), unnamed (+2210)
Casp4	unnamed (+170), unnamed (+570), unnamed (+770)
Zc3h12a	unnamed (+1371), unnamed (+1571), unnamed (+1771), unnamed (+1971)
Muc4	unnamed (-9317), unnamed (-9117)
Naip1	unnamed (-6417), unnamed (-6217)
Pigr	unnamed (+240), unnamed (+440), unnamed (+640), unnamed (+840), unnamed (+1040), unnamed (+1240), unnamed (+1440), unnamed (+5840), unnamed (+6040)
Spsb1	unnamed (+192), unnamed (+392), unnamed (+592)
Ptk6	unnamed (+621), unnamed (+821), unnamed (+1021)
Mfsd4	unnamed (+224)
Slc35f2	unnamed (+1091), unnamed (+1291)
Itln1	unnamed (+8643)
Muc13	unnamed (-9135), unnamed (-8935), unnamed (-8735), unnamed (-8535), unnamed (-8335), unnamed (-8135), unnamed (-7935), unnamed (-7735), unnamed (-7535), unnamed (-7335), unnamed (-7135), unnamed (+4545), unnamed (+4745), unnamed (+4945), unnamed (+5145), unnamed (+5545), unnamed (+5745)
Tnfsf10	unnamed (+431)
Oas3	unnamed (-8921)
Bhlhe40	unnamed (+2581)
Tm4sf20	unnamed (+8058)
Ndst1	unnamed (+4875), unnamed (+5075), unnamed (+5275)
Dpp7	unnamed (-3558)
Map2k5	unnamed (+4987), unnamed (+5787)
Adck4	unnamed (-1550), unnamed (-762)
Tff3	unnamed (-6118), unnamed (-5918), unnamed (-3918), unnamed (-3718), unnamed (-3518), unnamed (-3118), unnamed (-2541), unnamed (-2141), unnamed (-1141), unnamed (-941), unnamed (-741), unnamed (+510), unnamed (+710), unnamed (+910)
Il22ra1	unnamed (-6480)
Tsku	unnamed (+9969)
Papss2	unnamed (+3622)
4930539E08Rik	unnamed (+74), unnamed (+674), unnamed (+874)
Lgals8	unnamed (+7264)
D5Ertd579e	unnamed (+6706)
Sec22a	unnamed (-9976)
Ctss	unnamed (-9807)
Ptp4a1	unnamed (+8442), unnamed (+9242), unnamed (+9442)
D19Ertd737e	unnamed (-4443)
Sfn	unnamed (+4057)
Atp7b	unnamed (+4181)
Gosr2	unnamed (-8316), unnamed (-6916), unnamed (-3293), unnamed (-3093)
Aimp2	unnamed (+5325)
Apol7a	unnamed (-5403)
Dnmbp	unnamed (-8138), unnamed (-5738)
Rnf115	unnamed (-5498)
Ppip5k2	unnamed (-2100)
E430018J23Rik	unnamed (-3517)
Sp4	unnamed (-3591), unnamed (-3393), unnamed (-3195), unnamed (-2997), unnamed (-2799), unnamed (-2601), unnamed (-2007), unnamed (-1809), unnamed (-1611)
Ankrd9	unnamed (-9836), unnamed (-9636)
Numa1	unnamed (+6786)
Med23	unnamed (-7253)
Timm10	unnamed (-2088), unnamed (-888)
Gm7120	unnamed (-9621), unnamed (-9421), unnamed (-9221), unnamed (-8021)
Epha1	unnamed (+6760)
Arhgap42	unnamed (-3626)
Oxsr1	unnamed (-1815)
Usp32	unnamed (+9551)
Gstm4	unnamed (+8471), unnamed (+8649)
Ube2l6	unnamed (-4198), unnamed (-3998), unnamed (-2798)
Lztfl1	unnamed (+8673)
D15Ertd621e	unnamed (-8291), unnamed (-8091), unnamed (-7891), unnamed (-7691), unnamed (-7491), unnamed (-7291), unnamed (-7091), unnamed (-6891), unnamed (-6691), unnamed (-6091), unnamed (-5891), unnamed (-5691), unnamed (-4691)
Wdr7	unnamed (+1760)
Rhob	unnamed (-4606)
Cdadc1	unnamed (+7373)
Ghitm	unnamed (-7036), unnamed (-6493), unnamed (-5521)
Sin3a	unnamed (+3980), unnamed (+4180)
Fcer1g	unnamed (+1993), unnamed (+2193)
Ugt1a1	unnamed (+6038), unnamed (+6238), unnamed (+6438)
Rab43	unnamed (-1716), unnamed (-1516)
Psmd3	unnamed (+3880), unnamed (+4080), unnamed (+5280)
Os9	unnamed (-9350), unnamed (-6520), unnamed (-720)
Rhog	unnamed (+8315)
Osbpl3	unnamed (+4041)
Ttc39b	unnamed (-3386)
Abhd12	unnamed (+5637)
2016-03-06	unnamed (-2873), unnamed (-2673), unnamed (-2473)
Eif4h	unnamed (-3472)
Wasf2	unnamed (-2649)
Ypel5	unnamed (-9509), unnamed (-9309)
Larp4b	unnamed (-2782)
Hif1a	unnamed (-1635)
D10Wsu52e	unnamed (+5206)
Abhd2	unnamed (-2392)
Becn1	unnamed (-4744)
Mdh2	unnamed (+8787), unnamed (+9187)
Bivm	unnamed (+1645)
Slc25a45	unnamed (-581)
Tmem120a	unnamed (-8713), unnamed (-8513)
Tmem50a	unnamed (-1902), unnamed (-1702)
Abcc2	unnamed (+9875)
Plbd1	unnamed (+2434)
Mtmr14	unnamed (+4202)
Entpd5	unnamed (+3705), unnamed (+4305), unnamed (+5305)
Pdcl3	unnamed (-5594), unnamed (-4994)
Ube2q1	unnamed (+7955)
Tmbim1	unnamed (-8681)
Txnl1	unnamed (-6839), unnamed (-6639), unnamed (-6439), unnamed (-6239), unnamed (-6039), unnamed (-5239)
Ikbkg	unnamed (+4736), unnamed (+5267), unnamed (+5444)
Tpsg1	unnamed (+1672)
Rbm14	unnamed (-3462), unnamed (-3264)
Ankrd12	unnamed (+6845)
Slc22a4	unnamed (+7653), unnamed (+7853)
Lats1	unnamed (+8414)
Pgm2	unnamed (-1994)
Cyp2d26	unnamed (+5451)
Mmadhc	unnamed (-9066), unnamed (-4376), unnamed (-4176), unnamed (-3576), unnamed (-3376)
Rps6ka5	unnamed (+2096)
Tjp2	unnamed (-6279), unnamed (-6079)
Lysmd4	unnamed (-9261)
Urm1	unnamed (+7175), unnamed (+7375), unnamed (+7575), unnamed (+7775), unnamed (+8575), unnamed (+8775)
Ndfip2	unnamed (-1846), unnamed (-1325), unnamed (-1125), unnamed (-925)
Lrp5	unnamed (-7512)
Manba	unnamed (+6296), unnamed (+6496), unnamed (+6696)
Syne2	unnamed (+8150)
Fbxl3	unnamed (+7881), unnamed (+8081)
Rabggta	unnamed (-7426), unnamed (-7226), unnamed (-7026)
Ppil2	unnamed (-1971), unnamed (-1771)
Zcchc4	unnamed (+4857)
Gdi2	unnamed (-6695)
Sfxn1	unnamed (-1042), unnamed (-842)
Sox13	unnamed (-36), unnamed (+125)
Scnn1a	unnamed (+6041)
Ace	unnamed (-6885)
Mon1a	unnamed (+5245)
Wfs1	unnamed (-1298)
Map3k2	unnamed (-2629), unnamed (-2429)
Igsf5	unnamed (-8830), unnamed (-8630), unnamed (-8430)
Med28	unnamed (-7383)
Pgm1	unnamed (+4463), unnamed (+4663)
Hjurp	unnamed (-7594), unnamed (+2052)
Fdx1	unnamed (+6602)
Atg2a	unnamed (-2190), unnamed (-1992)
Thap7	unnamed (+1701)
Kctd21	unnamed (-2744), unnamed (-2544), unnamed (-2344), unnamed (-2144)
Akr1e1	unnamed (-8608), unnamed (-8529)
Cry2	unnamed (+5271)
Wrap53	unnamed (+5292), unnamed (+6741), unnamed (+6939), unnamed (+7137), unnamed (+7335), unnamed (+7533), unnamed (+7731), unnamed (+8523), unnamed (+8721), unnamed (+8919), unnamed (+9117)
Sdsl	unnamed (+1879), unnamed (+2079)
Mtmr12	unnamed (-2689), unnamed (-2506)
Sacm1l	unnamed (+4113)
Smcr7l	unnamed (+6309), unnamed (+6509)
Egr1	unnamed (+2907)
Sec14l2	unnamed (+8392)
Gm15800	unnamed (-1767), unnamed (-1167), unnamed (-967), unnamed (+8726)
Sqrdl	unnamed (+1834), unnamed (+4234), unnamed (+8434), unnamed (+9618), unnamed (+9818)
Fmo5	unnamed (+8431)
Mccc1	unnamed (+2569), unnamed (+2766), unnamed (+6217), unnamed (+6417), unnamed (+6617), unnamed (+6817), unnamed (+7017), unnamed (+7217)
8430410A17Rik	unnamed (+1976)
Hsd17b11	unnamed (-4814)
N4bp2l1	unnamed (-9792)
Pdia4	unnamed (-2925)
Trim38	unnamed (-4994), unnamed (+806)
Ano6	unnamed (-1686), unnamed (-1486), unnamed (-1286), unnamed (+7352), unnamed (+7552), unnamed (+7752), unnamed (+7952), unnamed (+9352)
Aqp11	unnamed (+5832)
Lrp6	unnamed (-9211)
Ifngr1	unnamed (-2995)
Ttc13	unnamed (+6676), unnamed (+6876), unnamed (+7076)
Fbxo33	unnamed (+6367), unnamed (+6567)
Ccnyl1	unnamed (+4807)
Bola2	unnamed (-5119)
Slc25a28	unnamed (-6443), unnamed (-6243), unnamed (-6043)
Tspan5	unnamed (-5782)
Slc5a6	unnamed (+7767), unnamed (+7967), unnamed (+8167), unnamed (+8367), unnamed (+8767)
Sod1	unnamed (-6506)
Hagh	unnamed (+4939)
0610011F06Rik	unnamed (-3114)
Ccdc142	unnamed (+2617)
Wdfy1	unnamed (+6556), unnamed (+6756)
Siah2	unnamed (-3275), unnamed (-3075), unnamed (+6426)
Mrps15	unnamed (+2237)
Ttpal	unnamed (+4465)
Spire2	unnamed (-1998), unnamed (-1798)
Rps8	unnamed (-6498), unnamed (-5568)
Slc6a19	unnamed (-9882), unnamed (-9682), unnamed (-9482), unnamed (-6482)
Fam151a	unnamed (-2067), unnamed (-1867), unnamed (-1667), unnamed (-1467), unnamed (-1267), unnamed (-1067), unnamed (-867), unnamed (+933)
Gstm6	unnamed (-8482), unnamed (+916)
Cdc42ep2	unnamed (-2405), unnamed (-2205), unnamed (-405), unnamed (-205)
Fabp2	unnamed (-9385), unnamed (-8985), unnamed (-2585)
Itpripl2	unnamed (-6183)
Slc7a15	unnamed (-8641)
Lamb3	unnamed (-1202)
Lgmn	unnamed (+7536), unnamed (+7736), unnamed (+9282)
Ttc4	unnamed (-4541), unnamed (+2467), unnamed (+5080), unnamed (+5880)
Lss	unnamed (+5066), unnamed (+5263)
Idh1	unnamed (+3927), unnamed (+5527), unnamed (+5727), unnamed (+7927), unnamed (+8327)
Slc15a1	unnamed (-2622), unnamed (-2422)
Inpp5e	unnamed (-6764), unnamed (-5872)
Slc22a5	unnamed (+6727)
Anxa4	unnamed (+5642), unnamed (+5842), unnamed (+6042), unnamed (+6242), unnamed (+6442), unnamed (+6642), unnamed (+6842), unnamed (+7042), unnamed (+7642), unnamed (+8842)
Tm4sf5	unnamed (-5771)
Slc6a20a	unnamed (+9042), unnamed (+9242)
Rdh7	unnamed (+3895), unnamed (+4095), unnamed (+4295), unnamed (+4495), unnamed (+4895)
Hps3	unnamed (+2230), unnamed (+2430), unnamed (+2630)
Dfna5	unnamed (+5785), unnamed (+6985)
Plek2	unnamed (-3050), unnamed (-2050)
Odc1	unnamed (+4215), unnamed (+5415), unnamed (+7415), unnamed (+7615), unnamed (+7815), unnamed (+8015), unnamed (+8215), unnamed (+8415), unnamed (+8615), unnamed (+8815), unnamed (+9015)
Pde7a	unnamed (-1669), unnamed (-1469), unnamed (+1524), unnamed (+4558)
Rplp1	unnamed (+4163), unnamed (+4363), unnamed (+4563), unnamed (+5563)
Aldh3a2	unnamed (-3517), unnamed (+2152), unnamed (+2352)
Fam133b	unnamed (+3452)
Star	unnamed (+9843)
Pola2	unnamed (+9413), unnamed (+9613)
Rasgrf2	unnamed (+5458)
Slc19a2	unnamed (-6118), unnamed (-5954)
Per1	unnamed (+2934), unnamed (+3328)
Ntn4	unnamed (+6302), unnamed (+6500), unnamed (+7094), unnamed (+7292)
Plekhf1	unnamed (-7735), unnamed (-7535)
Arl13b	unnamed (-2891), unnamed (-2691), unnamed (-2491), unnamed (-2291), unnamed (-2091), unnamed (-1891), unnamed (-1691), unnamed (-1491), unnamed (-1291), unnamed (-1091), unnamed (+1453), unnamed (+2805), unnamed (+3003), unnamed (+3201), unnamed (+3399), unnamed (+3597), unnamed (+3795), unnamed (+3993), unnamed (+4785)
Slc5a4a	unnamed (+4700), unnamed (+5300)
Cyp27a1	unnamed (+6717)
Akr1c14	unnamed (+3877), unnamed (+4070)
Naaa	unnamed (-9185), unnamed (+2383), unnamed (+2583), unnamed (+2783)
Sphk1	unnamed (+774)
Cyp2j6	unnamed (+5554)
Gsta3	unnamed (+2472), unnamed (+2672)
Il17rc	unnamed (+4074), unnamed (+4274)
2310044G17Rik	unnamed (+4845), unnamed (+5045), unnamed (+5845)
Tbc1d8	unnamed (+2766), unnamed (+2964)
Gk5	unnamed (+1126), unnamed (+1726), unnamed (+1926), unnamed (+2126), unnamed (+2326), unnamed (+2526)
Scin	unnamed (-4510), unnamed (-4310), unnamed (+2625), unnamed (+2825), unnamed (+3425), unnamed (+3625)
Ppara	unnamed (-4589), unnamed (-4389), unnamed (+3174), unnamed (+3374), unnamed (+4774)
Ccdc64	unnamed (+1108)
Gpr133	unnamed (-1144), unnamed (+1056), unnamed (+1256), unnamed (+1456), unnamed (+1656)
Bcl2l15	unnamed (+4364)
Adh1	unnamed (+3395), unnamed (+3586), unnamed (+8265), unnamed (+8429)
Mgst1	unnamed (-1499), unnamed (+5692)
Sytl1	unnamed (+8812)
Flywch1	unnamed (+5816)
Slc47a1	unnamed (-8584), unnamed (-7784)
Acaa2	unnamed (+6942), unnamed (+9542)
Anxa13	unnamed (-8632), unnamed (-8432), unnamed (-7432), unnamed (-6544), unnamed (-5544), unnamed (-5344), unnamed (+2851), unnamed (+3498), unnamed (+3671), unnamed (+4222), unnamed (+4422), unnamed (+5222), unnamed (+5422), unnamed (+5622), unnamed (+5822), unnamed (+6822), unnamed (+7022)
Gsta4	unnamed (-3270), unnamed (-3081), unnamed (-2325), unnamed (+1605), unnamed (+2831)
Gsta1	unnamed (+3361), unnamed (+3561), unnamed (+3761), unnamed (+4161)
Svip	unnamed (-2219), unnamed (-2019)
Pmp22	unnamed (+3198), unnamed (+3398), unnamed (+4598), unnamed (+5398), unnamed (+6598), unnamed (+6798), unnamed (+6998), unnamed (+7198), unnamed (+7398), unnamed (+8198), unnamed (+8398), unnamed (+8598), unnamed (+8798), unnamed (+8998), unnamed (+9598), unnamed (+9998)
Cth	unnamed (-9848), unnamed (+2326)
Plscr1	unnamed (+2748), unnamed (+2948), unnamed (+3148), unnamed (+3348), unnamed (+3948), unnamed (+4148), unnamed (+4348)
Ces1f	unnamed (+4580)
Aqp3	unnamed (+5417), unnamed (+7217), unnamed (+7417), unnamed (+7617), unnamed (+7817), unnamed (+8617), unnamed (+9017), unnamed (+9217), unnamed (+9417), unnamed (+9617), unnamed (+9817)
Mvk	unnamed (+9550), unnamed (+9747), unnamed (+9944)
Gstm2	unnamed (+936), unnamed (+1136), unnamed (+1936), unnamed (+2136), unnamed (+2336), unnamed (+2536), unnamed (+2736), unnamed (+2936), unnamed (+3136), unnamed (+4736), unnamed (+4936)
1700025G04Rik	unnamed (+2312)
Ces1d	unnamed (+1323), unnamed (+1523)
Cyp4b1	unnamed (+5665), unnamed (+5865), unnamed (+6065), unnamed (+6465)
Ces1g	unnamed (+726), unnamed (+1126), unnamed (+1326), unnamed (+1526), unnamed (+1726)
Gstm1	unnamed (+2139), unnamed (+2339), unnamed (+2539), unnamed (+3339), unnamed (+3539)
Akr1c12	unnamed (+1149), unnamed (+2349), unnamed (+2549), unnamed (+2749), unnamed (+2949), unnamed (+3149)
Pnliprp2	unnamed (-9911), unnamed (-9711), unnamed (-8911)
1810046K07Rik	unnamed (+4574), unnamed (+4774), unnamed (+4974), unnamed (+5174), unnamed (+9155)
Aldh1a1	unnamed (-8127), unnamed (+3501), unnamed (+3701), unnamed (+3901), unnamed (+5301), unnamed (+6814), unnamed (+6987), unnamed (+7439), unnamed (+7562)
Slc28a1	unnamed (-6753), unnamed (-6553), unnamed (-6353), unnamed (-6153), unnamed (-5953), unnamed (-5753), unnamed (-5553), unnamed (-5353), unnamed (-5153), unnamed (-2418), unnamed (-2218), unnamed (-818), unnamed (-618), unnamed (+1982), unnamed (+2382), unnamed (+2582), unnamed (+4982), unnamed (+5182), unnamed (+5382), unnamed (+5582), unnamed (+5782), unnamed (+5982), unnamed (+6182), unnamed (+…
Mfsd7c	unnamed (+963), unnamed (+1163), unnamed (+1563), unnamed (+1963), unnamed (+2163), unnamed (+2363), unnamed (+2763), unnamed (+2963), unnamed (+3163), unnamed (+6848), unnamed (+7042), unnamed (+7423), unnamed (+9023)
Errfi1	unnamed (+2981), unnamed (+3181), unnamed (+3381), unnamed (+3581), unnamed (+3781), unnamed (+3981), unnamed (+4181), unnamed (+4381), unnamed (+4581), unnamed (+8181), unnamed (+8981)
Usp35	unnamed (+6032), unnamed (+6232)
Tnfrsf21	unnamed (+1511), unnamed (+1711)
Oas1e	unnamed (+7618), unnamed (+8758)
Pcsk9	unnamed (+2901)
Ndrg1	unnamed (+2828), unnamed (+3028), unnamed (+3228), unnamed (+3428), unnamed (+3628), unnamed (+3828), unnamed (+4028), unnamed (+4228), unnamed (+4428), unnamed (+4628), unnamed (+4828), unnamed (+5228), unnamed (+5428), unnamed (+5628), unnamed (+5828), unnamed (+6428)
Pros1	unnamed (-3408), unnamed (-3208), unnamed (-3008), unnamed (-2808), unnamed (-2608), unnamed (-2408), unnamed (-1808), unnamed (-1608), unnamed (-1408), unnamed (-1208), unnamed (-1008), unnamed (+1192), unnamed (+1392), unnamed (+1592)
Klf15	unnamed (-789), unnamed (+1611), unnamed (+1811), unnamed (+2011)
Scd2	unnamed (-1322), unnamed (-1122), unnamed (+3478), unnamed (+3678), unnamed (+3878), unnamed (+4078), unnamed (+4278), unnamed (+4478), unnamed (+4678), unnamed (+4878), unnamed (+5078), unnamed (+5278), unnamed (+5478), unnamed (+5678), unnamed (+6274), unnamed (+6474), unnamed (+6674), unnamed (+6874), unnamed (+7074), unnamed (+7274), unnamed (+7474), unnamed (+7874)
Ugt1a9	unnamed (-6102), unnamed (-5902), unnamed (-5702), unnamed (-5502), unnamed (-5302), unnamed (-5102), unnamed (-4502), unnamed (-4302), unnamed (-4102), unnamed (-3902), unnamed (+790), unnamed (+1986), unnamed (+4212), unnamed (+4412), unnamed (+4612)
Cyp2c29	unnamed (-2153), unnamed (-1953), unnamed (+1047), unnamed (+1247), unnamed (+1447), unnamed (+1647), unnamed (+1847), unnamed (+2047), unnamed (+2247), unnamed (+2447), unnamed (+3337)
Tm4sf4	unnamed (-5387), unnamed (-5187), unnamed (-4987), unnamed (-4587), unnamed (-4387), unnamed (-4187), unnamed (-3987), unnamed (-3787), unnamed (-3587), unnamed (-1276), unnamed (-1076), unnamed (-876), unnamed (+724), unnamed (+924), unnamed (+1124), unnamed (+1324), unnamed (+1524), unnamed (+1724), unnamed (+1924), unnamed (+2124), unnamed (+2324), unnamed (+2524), unnamed (+2724), unnamed (+2…
Akr1c13	unnamed (+2728), unnamed (+2928), unnamed (+3480), unnamed (+3656), unnamed (+3832), unnamed (+4008), unnamed (+9680)
Mt1	unnamed (+1610), unnamed (+1810), unnamed (+4634), unnamed (+4834), unnamed (+5614), unnamed (+6584), unnamed (+6778), unnamed (+8524), unnamed (+9454)
Akr1c19	unnamed (+1772), unnamed (+2172), unnamed (+2372), unnamed (+3372), unnamed (+3572), unnamed (+3772), unnamed (+3972), unnamed (+4172), unnamed (+7205), unnamed (+7405), unnamed (+8205), unnamed (+8405), unnamed (+8605), unnamed (+8805), unnamed (+9005), unnamed (+9205), unnamed (+9405), unnamed (+9605), unnamed (+9805)
Mt2	unnamed (+1931)

## Sheet: Sup. Table S6 CV H3K4me1 Genes
Supplemental Table S6: Genes associated with differential H3K4me1 sites (FDR < 0.01) (related to Fig. 3)
Genes associated with H3K4me1 regions induced by the microbiota							Association rule: Single nearest gene: 10000 bp max extension, curated regulatory domains included
Gene Name	Peak Locations relative to TSS
Saa1	unnamed (-265), unnamed (-102), unnamed (+224), unnamed (+1314)
Reg3b	unnamed (-5079), unnamed (-4879), unnamed (-4679), unnamed (-2679), unnamed (-1601), unnamed (+894), unnamed (+1094), unnamed (+1294), unnamed (+1494), unnamed (+1694), unnamed (+1894), unnamed (+2094), unnamed (+2294), unnamed (+2494)
Reg3g	unnamed (-3492), unnamed (-83), unnamed (+117), unnamed (+317), unnamed (+517), unnamed (+717), unnamed (+917), unnamed (+1117), unnamed (+1317), unnamed (+1517), unnamed (+1717), unnamed (+1917), unnamed (+2117), unnamed (+2317), unnamed (+2517), unnamed (+2717), unnamed (+2917), unnamed (+3117), unnamed (+3317), unnamed (+3517), unnamed (+3917), unnamed (+4117)
Nos2	unnamed (+5742), unnamed (+5942), unnamed (+6142), unnamed (+6342), unnamed (+7114), unnamed (+7222), unnamed (+7624), unnamed (+7814), unnamed (+8004)
Ubd	unnamed (-4049), unnamed (-668)
Alpk1	unnamed (-4438), unnamed (-4312), unnamed (-4186), unnamed (-3161), unnamed (-2961), unnamed (-2761), unnamed (-2561), unnamed (-2361), unnamed (-2161), unnamed (-737), unnamed (-537), unnamed (-337)
Paqr9	unnamed (+993), unnamed (+1393), unnamed (+1593), unnamed (+1793), unnamed (+1993), unnamed (+2193), unnamed (+2393), unnamed (+9678), unnamed (+9878)
Slfn5	unnamed (+1458), unnamed (+2058), unnamed (+2258)
Tifa	unnamed (-2921), unnamed (-2721), unnamed (-2521), unnamed (+2218), unnamed (+2418), unnamed (+2618), unnamed (+2818), unnamed (+3018), unnamed (+3218), unnamed (+3418), unnamed (+3618), unnamed (+4418), unnamed (+4618), unnamed (+5111), unnamed (+5225), unnamed (+5339), unnamed (+6220), unnamed (+6420), unnamed (+8420), unnamed (+8620), unnamed (+8820), unnamed (+9020), unnamed (+9220), unnamed …
Ifi44	unnamed (-3209), unnamed (-2409), unnamed (-2009), unnamed (+579), unnamed (+979), unnamed (+1179)
Fbp1	unnamed (-9863), unnamed (-9666), unnamed (-5013), unnamed (+1432), unnamed (+1832), unnamed (+2432), unnamed (+2632), unnamed (+3547), unnamed (+6922), unnamed (+9122), unnamed (+9322), unnamed (+9722)
Kdelr3	unnamed (+1499), unnamed (+1695), unnamed (+2343), unnamed (+2539), unnamed (+2735), unnamed (+2931)
Dmbt1	unnamed (+5918), unnamed (+9093), unnamed (+9293), unnamed (+9493)
Dao	unnamed (-4676), unnamed (-3476), unnamed (-981), unnamed (+2819), unnamed (+3019), unnamed (+4541)
Kctd14	unnamed (+2507), unnamed (+2707), unnamed (+2907), unnamed (+3107)
Slc16a6	unnamed (-5007), unnamed (-4219), unnamed (-4022), unnamed (+3610), unnamed (+3810), unnamed (+4010), unnamed (+4210), unnamed (+4410), unnamed (+4610), unnamed (+4810), unnamed (+5010), unnamed (+5210), unnamed (+5410), unnamed (+5610), unnamed (+5810), unnamed (+6010), unnamed (+6210), unnamed (+6410), unnamed (+6610), unnamed (+7596), unnamed (+7784), unnamed (+7972)
Arsg	unnamed (-592), unnamed (+2808), unnamed (+3008), unnamed (+4451)
Casp4	unnamed (+4136), unnamed (+4531), unnamed (+4721), unnamed (+4911), unnamed (+5101), unnamed (+5291), unnamed (+8655), unnamed (+8828), unnamed (+9001)
Gm14446	unnamed (+1635), unnamed (+2235), unnamed (+2835), unnamed (+3435), unnamed (+3635), unnamed (+4625), unnamed (+5671)
Ptafr	unnamed (-9584), unnamed (-9394), unnamed (+2761), unnamed (+2961), unnamed (+5934), unnamed (+6534), unnamed (+6734), unnamed (+6934), unnamed (+7134), unnamed (+7334), unnamed (+7734), unnamed (+7934)
Cyba	unnamed (+1303)
Zc3h12a	unnamed (+6662), unnamed (+6862), unnamed (+7062), unnamed (+7262), unnamed (+7462), unnamed (+7662), unnamed (+7862), unnamed (+8062), unnamed (+8262), unnamed (+8462), unnamed (+8662), unnamed (+8862), unnamed (+9062)
Mmp28	unnamed (+1158)
Abcc3	unnamed (+3596), unnamed (+6825)
Ppp1r16b	unnamed (+4705), unnamed (+7382), unnamed (+7582)
Ddx60	unnamed (-4906), unnamed (-4706), unnamed (-1506), unnamed (+3606), unnamed (+3806)
Trim30a	unnamed (+1712)
Zbp1	unnamed (+1422), unnamed (+1622), unnamed (+1822), unnamed (+2022), unnamed (+2222), unnamed (+2822), unnamed (+3022), unnamed (+3222), unnamed (+3422), unnamed (+3622), unnamed (+3822), unnamed (+4022), unnamed (+4222), unnamed (+4422)
4930402H24Rik	unnamed (+1937)
Ssh1	unnamed (+1951)
2210407C18Rik	unnamed (+5734)
Tgm2	unnamed (-3470), unnamed (+2654), unnamed (+2854), unnamed (+5454)
Slc9a3	unnamed (+9891)
Slc19a1	unnamed (+9993)
Ifit3	unnamed (-9171), unnamed (-8971)
Fcgrt	unnamed (+1300), unnamed (+1500), unnamed (+1700), unnamed (+1900), unnamed (+2100), unnamed (+2300), unnamed (+2900), unnamed (+3383), unnamed (+3544)
Gdpd5	unnamed (+5434), unnamed (+5634), unnamed (+5834), unnamed (+6034)
Pglyrp1	unnamed (-3253)
Apoc2	unnamed (+5080)
Bcl9	unnamed (-4918), unnamed (-4718), unnamed (-4518), unnamed (-4318), unnamed (-4118), unnamed (-2118)
H6pd	unnamed (+7458), unnamed (+7658), unnamed (+7858), unnamed (+8658)
Ppt1	unnamed (-8698), unnamed (-5098), unnamed (-4498), unnamed (-4298), unnamed (+1202), unnamed (+1402), unnamed (+2021), unnamed (+2217)
Tnfrsf11a	unnamed (+7844), unnamed (+8044)
Rtp4	unnamed (+2908), unnamed (+3108)
Dak	unnamed (+3422), unnamed (+3622), unnamed (+3822), unnamed (+4022)
Tc2n	unnamed (+1846)
Barx2	unnamed (+5844)
Mov10	unnamed (-4290), unnamed (-4090), unnamed (-3890), unnamed (-3690), unnamed (-3490), unnamed (-3290), unnamed (-2690), unnamed (-2490), unnamed (-2290), unnamed (-2090), unnamed (-1890), unnamed (-1690), unnamed (-1490), unnamed (-1290), unnamed (-1090), unnamed (+2310)
Cd38	unnamed (+6220)
Rabl5	unnamed (+1129), unnamed (+1329), unnamed (+1529), unnamed (+1729), unnamed (+1929), unnamed (+2129), unnamed (+2329), unnamed (+7949)
Ppard	unnamed (+2718), unnamed (+2918), unnamed (+3118), unnamed (+3318), unnamed (+3518), unnamed (+3918), unnamed (+4118), unnamed (+4518), unnamed (+4718), unnamed (+4918), unnamed (+5118), unnamed (+5318), unnamed (+7873), unnamed (+8073), unnamed (+8673), unnamed (+8873), unnamed (+9073), unnamed (+9273), unnamed (+9673), unnamed (+9873)
Tha1	unnamed (-9959), unnamed (-9543), unnamed (-9343), unnamed (-9143), unnamed (-8943), unnamed (-8743), unnamed (-8343), unnamed (-8143), unnamed (-7943), unnamed (-7743), unnamed (-7543), unnamed (-2237), unnamed (+1613), unnamed (+1813)
Spsb1	unnamed (+1792), unnamed (+1992), unnamed (+2192), unnamed (+2392), unnamed (+2592), unnamed (+2792), unnamed (+4987), unnamed (+5186), unnamed (+5385), unnamed (+5584), unnamed (+5783), unnamed (+5982), unnamed (+6181), unnamed (+6380), unnamed (+6579), unnamed (+9762), unnamed (+9962)
Prss30	unnamed (+3303), unnamed (+8703), unnamed (+8903), unnamed (+9103), unnamed (+9303), unnamed (+9503), unnamed (+9703), unnamed (+9903)
Sema6d	unnamed (+3370), unnamed (+3570), unnamed (+3770), unnamed (+4570), unnamed (+5170), unnamed (+5370), unnamed (+5570), unnamed (+5770)
Ptk6	unnamed (+3421), unnamed (+3621), unnamed (+3821)
Mfsd4	unnamed (-8360), unnamed (+824), unnamed (+1024), unnamed (+1224), unnamed (+1424), unnamed (+1624), unnamed (+1824), unnamed (+2024), unnamed (+2224), unnamed (+2424), unnamed (+2624), unnamed (+2824), unnamed (+3024), unnamed (+3224), unnamed (+3424), unnamed (+3624), unnamed (+4219), unnamed (+4749), unnamed (+4949), unnamed (+5149), unnamed (+7149), unnamed (+7349), unnamed (+7549), unnamed (…
Oasl2	unnamed (+2979), unnamed (+4579), unnamed (+4779)
Gpr55	unnamed (-3216), unnamed (-2616), unnamed (-2416), unnamed (-213), unnamed (-13), unnamed (+187)
Slc35f2	unnamed (-1909), unnamed (-1709), unnamed (+6998), unnamed (+7198), unnamed (+7398), unnamed (+7598), unnamed (+7798), unnamed (+9641), unnamed (+9841)
Unc5cl	unnamed (+4818), unnamed (+5018), unnamed (+5218), unnamed (+5418), unnamed (+6018), unnamed (+6418), unnamed (+7018), unnamed (+7218), unnamed (+7418), unnamed (+7618), unnamed (+9303), unnamed (+9503), unnamed (+9703), unnamed (+9903)
Aplp2	unnamed (+7702), unnamed (+7902)
Smox	unnamed (+4192)
2010002M12Rik	unnamed (+7907), unnamed (+8107), unnamed (+8307), unnamed (+8507), unnamed (+9107), unnamed (+9707), unnamed (+9907)
Endod1	unnamed (-2260), unnamed (+2502)
Igf2bp2	unnamed (+2689), unnamed (+8378), unnamed (+8563), unnamed (+8748), unnamed (+8933), unnamed (+9118), unnamed (+9303), unnamed (+9488)
Fbxo32	unnamed (+743), unnamed (+943), unnamed (+1143), unnamed (+1343), unnamed (+2333), unnamed (+2529), unnamed (+2921), unnamed (+3117)
Rnf213	unnamed (+3238)
Plekha2	unnamed (-6745), unnamed (-6545), unnamed (-5145), unnamed (-4945), unnamed (-4745), unnamed (-4545), unnamed (-4345), unnamed (-4145)
Muc13	unnamed (-5735), unnamed (-5335)
Slc5a8	unnamed (-4697)
B3galtl	unnamed (-3763), unnamed (-3563), unnamed (+1277)
Dapk2	unnamed (+1431), unnamed (+1631)
Ociad2	unnamed (+5243), unnamed (+5443)
Hk2	unnamed (+1555), unnamed (+1755), unnamed (+1955), unnamed (+2555), unnamed (+2755)
Tgfbi	unnamed (+8480)
Gusb	unnamed (+2047)
Slc30a10	unnamed (+5045), unnamed (+5245), unnamed (+7045), unnamed (+7245)
Pklr	unnamed (+5275), unnamed (+5475)
Tnfsf10	unnamed (-5470), unnamed (-5270), unnamed (-4870), unnamed (-4670)
Ceacam20	unnamed (+5037)
Pfkfb3	unnamed (+4588), unnamed (+4788), unnamed (+4988), unnamed (+5188), unnamed (+5388), unnamed (+5588), unnamed (+5788), unnamed (+5988), unnamed (+6188), unnamed (+6988), unnamed (+7188), unnamed (+8788), unnamed (+9388)
Duox2	unnamed (+1372), unnamed (+1972)
Zfp870	unnamed (-9699), unnamed (-9499), unnamed (-9099)
Amotl2	unnamed (+6531)
Bid	unnamed (+1741), unnamed (+1941), unnamed (+2141), unnamed (+2541), unnamed (+2741), unnamed (+2941), unnamed (+3141)
Macrod1	unnamed (+9692), unnamed (+9882)
Plcg2	unnamed (+1148)
Proz	unnamed (+2347), unnamed (+2547)
Acox3	unnamed (+9138)
Tiam2	unnamed (-407)
Baiap2l1	unnamed (+3955), unnamed (+4155)
Cast	unnamed (-6449), unnamed (-6249), unnamed (-6049), unnamed (-5849), unnamed (-5649), unnamed (-5449)
Rnf145	unnamed (-7473)
Tap1	unnamed (-6768)
Fuca1	unnamed (+2293), unnamed (+6093), unnamed (+6293), unnamed (+6493), unnamed (+6693), unnamed (+6893), unnamed (+7093), unnamed (+7293), unnamed (+7693), unnamed (+7893)
Lgals9	unnamed (+9760)
Etv3	unnamed (+4934), unnamed (+5134)
Ninj1	unnamed (+2200), unnamed (+2398), unnamed (+2596), unnamed (+3388), unnamed (+3784)
Shisa5	unnamed (+1952), unnamed (+2152), unnamed (+2552)
Sh3bp2	unnamed (+3260)
Abca3	unnamed (+6479), unnamed (+6670), unnamed (+6861), unnamed (+7243), unnamed (+7434), unnamed (+7625), unnamed (+7816), unnamed (+8007)
Rilpl2	unnamed (+3947), unnamed (+4126), unnamed (+4305)
Apobec1	unnamed (+1190), unnamed (+1389), unnamed (+1588), unnamed (+1787)
Mical1	unnamed (+5871), unnamed (+6071), unnamed (+6271)
Ccl6	unnamed (-215), unnamed (-19), unnamed (+177), unnamed (+373), unnamed (+5387), unnamed (+5582)
Ncoa1	unnamed (-1016)
Dirc2	unnamed (+2595), unnamed (+5395), unnamed (+5995)
Il4ra	unnamed (+5263), unnamed (+5463), unnamed (+5663), unnamed (+5863), unnamed (+6063), unnamed (+6263)
Mlph	unnamed (+1213), unnamed (+1413)
Il15ra	unnamed (+2263), unnamed (+2463), unnamed (+2663)
Gcnt3	unnamed (+3209), unnamed (+3409), unnamed (+3609), unnamed (+3809), unnamed (+4209), unnamed (+6209)
Slc37a4	unnamed (-8683)
Xylt2	unnamed (+2446), unnamed (+3046), unnamed (+3246), unnamed (+3446), unnamed (+9412)
Myadm	unnamed (+7155)
Tm4sf20	unnamed (-3355), unnamed (-2973), unnamed (-2782), unnamed (-2591)
Rnf125	unnamed (-7763), unnamed (-7585), unnamed (-5718), unnamed (-5518), unnamed (-4918), unnamed (-4718)
Tmc5	unnamed (-9862)
Gpr160	unnamed (-1738)
Cx3cl1	unnamed (-8112), unnamed (-7929)
Frrs1	unnamed (-8246), unnamed (-7880)
Mreg	unnamed (+5058)
AA467197	unnamed (+2110)
Phospho1	unnamed (+7713)
Psma6	unnamed (-1893)
Fam118b	unnamed (+6450), unnamed (+6850), unnamed (+7050), unnamed (+7250)
Aggf1	unnamed (+4647), unnamed (+5047), unnamed (+5847), unnamed (+6047), unnamed (+6247)
Ttc22	unnamed (+3261), unnamed (+5061), unnamed (+5261), unnamed (+5461)
Zfp280d	unnamed (-2528), unnamed (-2333), unnamed (-2138), unnamed (-1943), unnamed (-1748), unnamed (-1553)
Apoe	unnamed (+114)
Adh6a	unnamed (-7726)
Ctdsp2	unnamed (-6831), unnamed (-6631), unnamed (-6431)
Vars2	unnamed (+7428), unnamed (+7614), unnamed (+8358), unnamed (+8544)
Slc26a6	unnamed (-9613), unnamed (-9413), unnamed (-9213), unnamed (-8613), unnamed (-8413), unnamed (-8213), unnamed (-5409)
Rnasel	unnamed (+4394), unnamed (+4594), unnamed (+4794)
Kbtbd11	unnamed (-9882), unnamed (-9683), unnamed (-9484), unnamed (-9285)
Myl7	unnamed (+1212), unnamed (+1412), unnamed (+1612)
Hdac5	unnamed (+5141)
4930539E08Rik	unnamed (-4700), unnamed (-4500), unnamed (-4300)
Tex2	unnamed (-2253)
Ndufs4	unnamed (-9115), unnamed (-8933)
Ttc39a	unnamed (-4784), unnamed (-4594), unnamed (-4404), unnamed (-4214), unnamed (+4752), unnamed (+4947), unnamed (+5142), unnamed (+5337), unnamed (+5532), unnamed (+5727), unnamed (+5922)
Duoxa2	unnamed (+693), unnamed (+893), unnamed (+1093), unnamed (+1293), unnamed (+1493), unnamed (+3293), unnamed (+3493)
Etohi1	unnamed (-2487), unnamed (-2328), unnamed (-2169)
P2ry2	unnamed (+9561)
Olfm4	unnamed (+283)
Dnm1l	unnamed (-7737)
Senp6	unnamed (-1175), unnamed (-988)
3830406C13Rik	unnamed (+4972), unnamed (+5159)
Nfya	unnamed (+5262), unnamed (+5462), unnamed (+5662)
Oxa1l	unnamed (-8376), unnamed (-8198), unnamed (-8020)
Prdm1	unnamed (+8595)
Slc35c2	unnamed (-7920), unnamed (-7720), unnamed (-7520), unnamed (-7320), unnamed (-6720)
Nme7	unnamed (+7040)
Dcp2	unnamed (+5996)
Etl4	unnamed (+7454)
Sdcbp	unnamed (-8523), unnamed (-8323), unnamed (-7923)
Dstn	unnamed (-5680)
Zfp217	unnamed (-826)
Plcl2	unnamed (-6435)
B4galt5	unnamed (-3661)
Krba1	unnamed (+7333)
Ptpn11	unnamed (-5740), unnamed (-5557), unnamed (-5374)
Eif2s2	unnamed (-1397), unnamed (-1197)
Ptbp1	unnamed (-9282), unnamed (-9083), unnamed (-8884)
Asb8	unnamed (+8147)
Pex26	unnamed (+8063), unnamed (+8244), unnamed (+8425), unnamed (+8606)
Gtf3c5	unnamed (-2724), unnamed (-2533)
Coro1c	unnamed (-5371), unnamed (-5171)
Anpep	unnamed (-7630), unnamed (-7430), unnamed (-6612), unnamed (-6531)
Txn1	unnamed (-9722)
Mlxipl	unnamed (-8231), unnamed (-8031), unnamed (-6831), unnamed (-6631), unnamed (-6431), unnamed (-5231), unnamed (-4231), unnamed (-4031), unnamed (-3031), unnamed (-2831), unnamed (-2631), unnamed (-2431)
Gnpnat1	unnamed (-2478), unnamed (-2290), unnamed (-2102)
Mapk3	unnamed (-9962)
Plekhm1	unnamed (-6876)
Dcun1d2	unnamed (-8713)
Socs3	unnamed (+2585), unnamed (+2785), unnamed (+3385), unnamed (+3585), unnamed (+9212)
Tspan13	unnamed (+225), unnamed (+425)
Myo5c	unnamed (+4764)
Txndc5	unnamed (+332)
Slc5a9	unnamed (+505), unnamed (+696), unnamed (+887), unnamed (+1269), unnamed (+1460), unnamed (+1651)
Galm	unnamed (-7922)
Ddx47	unnamed (+5619), unnamed (+5772), unnamed (+5925)
H2-K1	unnamed (-3427)
Ap3s2	unnamed (-3874), unnamed (-3674), unnamed (-3474), unnamed (-3274), unnamed (-3074)
Phc2	unnamed (-8103)
Daam1	unnamed (-9660)
Inpp5k	unnamed (+3808)
Gm3054	unnamed (-7907)
Pigyl	unnamed (+3772), unnamed (+3972), unnamed (+4772), unnamed (+4972)
Srebf2	unnamed (-6990)
Fos	unnamed (-9575), unnamed (-9375)
Gata5	unnamed (-8733)
Gps2	unnamed (-3177)
Gnaq	unnamed (-1582)
Ddx54	unnamed (+8938)
Pgs1	unnamed (+7626)
Mta1	unnamed (-7761)
Cpsf1	unnamed (+6305)
Taf1c	unnamed (-3286)
Rps11	unnamed (+4928)
Sema7a	unnamed (+815)
Slc4a7	unnamed (+312)
Wrnip1	unnamed (-5373), unnamed (-5184), unnamed (-4995)
Sigirr	unnamed (-3450), unnamed (-3276), unnamed (-3102), unnamed (-2928)
Sqrdl	unnamed (+434)
Ano6	unnamed (+3319)
Lamc2	unnamed (-5349), unnamed (-5150), unnamed (-4951)
Slc6a6	unnamed (+308)
B4galnt1	unnamed (+429), unnamed (+629), unnamed (+2629)
Rac2	unnamed (+544), unnamed (+740), unnamed (+936), unnamed (+1132), unnamed (+1328)
Krt19	unnamed (+151), unnamed (+351), unnamed (+551), unnamed (+751), unnamed (+951)
Anxa4	unnamed (-7456)
Tspan8	unnamed (+621), unnamed (+790), unnamed (+959), unnamed (+1128)
Pde7a	unnamed (+432), unnamed (+614)
Trib1	unnamed (-2473), unnamed (-2273)
Sdf2l1	unnamed (+203), unnamed (+392), unnamed (+581)
2016-09-05	unnamed (-1878), unnamed (+719), unnamed (+919), unnamed (+1119), unnamed (+1319), unnamed (+1919), unnamed (+2119)
Mapk6	unnamed (+1167)
Rogdi	unnamed (-6844)
Hsph1	unnamed (-9330), unnamed (-9130), unnamed (-8930)
Plscr1	unnamed (+348), unnamed (+548), unnamed (+748), unnamed (+948), unnamed (+1348), unnamed (+1548)
Tle1	unnamed (+60), unnamed (+260), unnamed (+660), unnamed (+860)
Aqp3	unnamed (+17), unnamed (+1617), unnamed (+3617)
1700025G04Rik	unnamed (+112)
Cyp4b1	unnamed (+65), unnamed (+265), unnamed (+465)
Errfi1	unnamed (-1191), unnamed (-991), unnamed (-791), unnamed (-591), unnamed (-391)
Tnfrsf21	unnamed (+111), unnamed (+311), unnamed (+511), unnamed (+711), unnamed (+911)
Ndrg1	unnamed (+228), unnamed (+1028)
Klf15	unnamed (+211), unnamed (+411)
Akr1c13	unnamed (+128), unnamed (+328)
Fkbp5	unnamed (+327)
Mt1	unnamed (+10), unnamed (+210)
Akr1c19	unnamed (+5205), unnamed (+5405)
Mt2	unnamed (-69), unnamed (+131)

## Sheet: Sup. Table S6 GF H3K27ac Genes
Supplemental Table S6: Genes associated with differential H3K27ac sites (FDR < 0.01) (related to Fig. 3)
Genes associated with H3K27ac regions suppressed by the microbiota							Association rule: Single nearest gene: 10000 bp max extension, curated regulatory domains included
Gene Name	Peak Locations relative to TSS
1190002N15Rik	unnamed (-251)
Sema6a	unnamed (+672)
Tnrc18	unnamed (-127)
Eno1	unnamed (-84), unnamed (+116)
Gpd1	unnamed (+1511)
Lgals3bp	unnamed (-6068)
Tff3	unnamed (-4726)
Acvr1b	unnamed (+3107)
Vil1	unnamed (+2908)
Mgat5	unnamed (+787)
Sel1l3	unnamed (-328)
Sec24a	unnamed (-830)
Tob1	unnamed (+277), unnamed (+477)
Dnmbp	unnamed (-5983), unnamed (-4983), unnamed (-4783)
Canx	unnamed (+276)
Cyp2b10	unnamed (+96), unnamed (+296)
2900026A02Rik	unnamed (-8688)
Por	unnamed (-6875), unnamed (-6275), unnamed (-6075), unnamed (-5875)
Mfsd11	unnamed (-224)
Cmpk2	unnamed (+8794)
Mtmr4	unnamed (+2114)
Acsl5	unnamed (-5909), unnamed (-1135), unnamed (-935), unnamed (-735), unnamed (+665), unnamed (+3065), unnamed (+3265), unnamed (+3465), unnamed (+3665), unnamed (+3865), unnamed (+6165), unnamed (+6365), unnamed (+6565), unnamed (+6765)
Pigc	unnamed (-2756)
Slc6a4	unnamed (+7742), unnamed (+7942), unnamed (+8142)
Sult2b1	unnamed (+800), unnamed (+1000)
Gna11	unnamed (-345)
Cyp2d22	unnamed (+274)
Enpp7	unnamed (-8750), unnamed (-2626), unnamed (+1374)
Flnb	unnamed (-9654)
Epha1	unnamed (+1104), unnamed (+2099), unnamed (+2298), unnamed (+2497)
Crat	unnamed (+7763)
Ace2	unnamed (+4436)
Dcaf15	unnamed (+606)
Tnfrsf1a	unnamed (+155), unnamed (+355)
Zbtb7b	unnamed (+998), unnamed (+1198), unnamed (+1398), unnamed (+4798), unnamed (+4998)
Zc3h4	unnamed (+106)
Ppap2c	unnamed (+1601), unnamed (+1801)
Thra	unnamed (+5985), unnamed (+6185), unnamed (+6385), unnamed (+7785)
Zyx	unnamed (+551)
Elovl1	unnamed (+968), unnamed (+1168)
D15Ertd621e	unnamed (-9852), unnamed (-9652)
Mlec	unnamed (-536)
Aldh1l1	unnamed (-374)
Lpp	unnamed (+6)
Gapdh	unnamed (+935), unnamed (+1135)
Pdia3	unnamed (-189)
Tmem82	unnamed (+434)
Gal3st2	unnamed (+1943)
Osbpl3	unnamed (+4500), unnamed (+6900), unnamed (+7100), unnamed (+7300), unnamed (+7500)
Coq10b	unnamed (-408), unnamed (-208)
Atn1	unnamed (-226), unnamed (-26)
Srsf2	unnamed (-332)
Mdh2	unnamed (+4180), unnamed (+4380), unnamed (+7580), unnamed (+7780)
Tmem120a	unnamed (+476), unnamed (+676), unnamed (+876)
Coro2a	unnamed (+1549), unnamed (+1749), unnamed (+1949), unnamed (+2149), unnamed (+3149)
Bcat2	unnamed (-1513)
Neurl3	unnamed (-1533)
Hspd1	unnamed (+378)
Adcy6	unnamed (-2041), unnamed (-1841)
Phlpp2	unnamed (-3086)
Gm3054	unnamed (-8181), unnamed (-7381), unnamed (-7181), unnamed (-6581), unnamed (-6381), unnamed (-6181)
Hsp90b1	unnamed (+244)
Vwa1	unnamed (+707)
Spint1	unnamed (+3318)
Faah	unnamed (-1457), unnamed (-1257)
Krt8	unnamed (-825), unnamed (-625), unnamed (+2175)
Erlin1	unnamed (+784)
Ldb3	unnamed (+4186)
Hnrpdl	unnamed (+514)
Lnx1	unnamed (-468)
Ahnak	unnamed (+672)
Eps8l3	unnamed (-4021)
Hnrnpa3	unnamed (+99), unnamed (+299)
Treh	unnamed (+440)
Fkbp2	unnamed (+155)
Slc9a3r1	unnamed (-766), unnamed (+3444)
Midn	unnamed (-2022), unnamed (-1822), unnamed (-1022), unnamed (-822), unnamed (-622)
Gata5	unnamed (-1533), unnamed (-1333)
Tuba1c	unnamed (-303)
Etfb	unnamed (-354)
Fam160b1	unnamed (+6799)
Fbln1	unnamed (+433), unnamed (+633)
Fam102a	unnamed (-9865), unnamed (-9665)
Osbpl6	unnamed (+267)
Casz1	unnamed (+532)
Dnajb11	unnamed (+235), unnamed (+435)
Aes	unnamed (-1165), unnamed (-965), unnamed (-765), unnamed (-565), unnamed (-365), unnamed (-165), unnamed (+2035)
Hjurp	unnamed (-2909), unnamed (-2709), unnamed (-1909)
Crip1	unnamed (-4227), unnamed (-2227), unnamed (-1427), unnamed (+1373), unnamed (+1573), unnamed (+1773), unnamed (+1973), unnamed (+2173)
Pdgfa	unnamed (+942)
Prr15	unnamed (+1719), unnamed (+1919), unnamed (+2319), unnamed (+2519)
Ppp2r4	unnamed (+424), unnamed (+624)
Trib3	unnamed (+110)
Sema7a	unnamed (+339), unnamed (+539)
Stk40	unnamed (+24), unnamed (+224)
Hsd17b4	unnamed (+142), unnamed (+342), unnamed (+542)
Amn	unnamed (-737), unnamed (-537)
Polr1d	unnamed (-179)
Kctd21	unnamed (-1605), unnamed (-1205), unnamed (-405), unnamed (+195)
Klf13	unnamed (+715)
Eif1	unnamed (+329)
Acy1	unnamed (-629), unnamed (-429), unnamed (+571), unnamed (+771)
Cml5	unnamed (+34), unnamed (+234)
Tagln2	unnamed (+1810)
Egr1	unnamed (+1552)
Nfat5	unnamed (+292)
Rundc3b	unnamed (+290), unnamed (+475), unnamed (+660)
Zfp688	unnamed (-5109), unnamed (-4909)
Pdia6	unnamed (+142), unnamed (+342)
Xpnpep2	unnamed (-1783), unnamed (-1583), unnamed (+417), unnamed (+1417)
Pdia4	unnamed (+381), unnamed (+581)
Cdc42se2	unnamed (+637)
Ano6	unnamed (+2122), unnamed (+3122), unnamed (+3322)
Slc16a5	unnamed (+284)
Tef	unnamed (-351), unnamed (-151), unnamed (+49), unnamed (+249), unnamed (+449)
Arhgap27	unnamed (+4826), unnamed (+5026)
Maz	unnamed (+280)
Sod1	unnamed (-9330), unnamed (-9130), unnamed (-8930)
Dpep1	unnamed (+6338)
Slc6a6	unnamed (+1628), unnamed (+2228), unnamed (+2428)
Ccdc142	unnamed (+1931), unnamed (+2131)
Nab2	unnamed (+956), unnamed (+1156)
Baiap2l2	unnamed (-476), unnamed (-276), unnamed (+1524)
Aqp1	unnamed (+129), unnamed (+329), unnamed (+529), unnamed (+729), unnamed (+929), unnamed (+1129), unnamed (+1329), unnamed (+2329)
Cdc37l1	unnamed (+140)
Slc23a1	unnamed (+223), unnamed (+422), unnamed (+621)
Slc38a2	unnamed (+631)
Slc6a19	unnamed (-8105), unnamed (-7905), unnamed (-7188), unnamed (+774), unnamed (+974), unnamed (+1174), unnamed (+1374), unnamed (+1574), unnamed (+1774), unnamed (+1974), unnamed (+2174), unnamed (+2574)
Manf	unnamed (+463)
Fabp2	unnamed (+2274)
B4galnt1	unnamed (-5933), unnamed (-5533), unnamed (-684), unnamed (-484), unnamed (-284), unnamed (+1116), unnamed (+1716), unnamed (+1916)
Guca2b	unnamed (-7734), unnamed (-7134), unnamed (-6934), unnamed (-1377), unnamed (-377)
Slc15a1	unnamed (-1664), unnamed (-1064), unnamed (-864), unnamed (-664), unnamed (-464), unnamed (-264), unnamed (+2736), unnamed (+2936), unnamed (+3136), unnamed (+3336), unnamed (+3536), unnamed (+3736), unnamed (+3936), unnamed (+4136), unnamed (+4336), unnamed (+4936), unnamed (+5136), unnamed (+5336), unnamed (+5536)
Krt19	unnamed (-2156), unnamed (-1956), unnamed (-1156), unnamed (-556), unnamed (+244), unnamed (+444), unnamed (+644), unnamed (+2044), unnamed (+3844), unnamed (+4044)
Glud1	unnamed (+783), unnamed (+983), unnamed (+1183), unnamed (+1383), unnamed (+1583), unnamed (+1783), unnamed (+2183), unnamed (+2383), unnamed (+2583)
Pgk1	unnamed (+219), unnamed (+418), unnamed (+617)
Hspa5	unnamed (+325)
Anxa4	unnamed (-7773), unnamed (-7573), unnamed (-7373), unnamed (-7173), unnamed (-5973), unnamed (-5773), unnamed (-5573), unnamed (-5373), unnamed (-5173), unnamed (-4973), unnamed (-2973), unnamed (+827), unnamed (+2227), unnamed (+4827), unnamed (+5027)
Rdh7	unnamed (+1363)
Dfna5	unnamed (+2262), unnamed (+2462), unnamed (+3062), unnamed (+3262)
Pde7a	unnamed (-488), unnamed (-288)
Slc13a2	unnamed (+231), unnamed (+431), unnamed (+631), unnamed (+831), unnamed (+1031), unnamed (+1231), unnamed (+1431), unnamed (+1631), unnamed (+1831), unnamed (+2031), unnamed (+2231), unnamed (+2431), unnamed (+2631), unnamed (+2831)
Pax8	unnamed (-4485), unnamed (-4286)
Aldh3a2	unnamed (-2713), unnamed (-2513), unnamed (-1913), unnamed (-1713)
Fam133b	unnamed (+3027), unnamed (+3227)
Mbl2	unnamed (-9526)
Cda	unnamed (+1040)
Sdf2l1	unnamed (+61), unnamed (+246), unnamed (+431)
2016-09-05	unnamed (-7163), unnamed (-2671), unnamed (-2471), unnamed (-2271), unnamed (-1471), unnamed (-1271), unnamed (-1071), unnamed (-871), unnamed (-671), unnamed (-471), unnamed (-271), unnamed (+329), unnamed (+529), unnamed (+729), unnamed (+929), unnamed (+1129), unnamed (+1329), unnamed (+1529), unnamed (+1729), unnamed (+1929), unnamed (+2129), unnamed (+2329), unnamed (+2529), unnamed (+2729)
Mapk6	unnamed (+840), unnamed (+1040), unnamed (+1240), unnamed (+1440), unnamed (+1640), unnamed (+1840), unnamed (+2040), unnamed (+2240), unnamed (+2640), unnamed (+2840), unnamed (+3040), unnamed (+3240), unnamed (+3440)
Ntn4	unnamed (+272), unnamed (+872), unnamed (+1072), unnamed (+1272)
Plekhf1	unnamed (+211), unnamed (+410), unnamed (+808), unnamed (+1604), unnamed (+1803)
Ccbl1	unnamed (+5192)
Gm9887	unnamed (-2535)
2310044G17Rik	unnamed (+109), unnamed (+309), unnamed (+509), unnamed (+709), unnamed (+909), unnamed (+1109), unnamed (+8898)
Tbc1d8	unnamed (+131), unnamed (+331)
Arl4d	unnamed (+2937), unnamed (+3137), unnamed (+3337), unnamed (+4137)
Syvn1	unnamed (+247)
Ppara	unnamed (-994), unnamed (+406), unnamed (+806), unnamed (+1006)
Gpr133	unnamed (-2801), unnamed (-2601), unnamed (0), unnamed (+191), unnamed (+382)
Bcl2l15	unnamed (+1160)
Phlda1	unnamed (+442), unnamed (+631)
Pck1	unnamed (+1678), unnamed (+2878)
Flywch1	unnamed (+2036), unnamed (+2236), unnamed (+2436), unnamed (+2636), unnamed (+2836), unnamed (+3036), unnamed (+3236), unnamed (+3436)
Map3k6	unnamed (+202), unnamed (+402)
Slc47a1	unnamed (-1728), unnamed (-1328), unnamed (-1128), unnamed (-928), unnamed (-728), unnamed (-528), unnamed (-128), unnamed (+72), unnamed (+272), unnamed (+472), unnamed (+672)
Acaa2	unnamed (-167), unnamed (+31), unnamed (+427), unnamed (+625)
Gsta1	unnamed (-1529), unnamed (-1329), unnamed (-1129), unnamed (+471), unnamed (+671)
Svip	unnamed (-4843)
Pmp22	unnamed (+136), unnamed (+336), unnamed (+536), unnamed (+736), unnamed (+936), unnamed (+1136), unnamed (+1336), unnamed (+1536), unnamed (+1736), unnamed (+1936), unnamed (+2136), unnamed (+2536), unnamed (+2736), unnamed (+2936), unnamed (+3136), unnamed (+3336), unnamed (+3536)
Ccrn4l	unnamed (-2888), unnamed (-858), unnamed (-258)
Plscr1	unnamed (+380), unnamed (+580), unnamed (+780), unnamed (+1180), unnamed (+1380)
Ces1f	unnamed (+1733)
Tle1	unnamed (-432), unnamed (-232), unnamed (-32), unnamed (+168), unnamed (+368), unnamed (+568), unnamed (+768), unnamed (+1168), unnamed (+1368)
Aqp3	unnamed (+163), unnamed (+363), unnamed (+563), unnamed (+763), unnamed (+963), unnamed (+1163), unnamed (+1363), unnamed (+1563), unnamed (+1963), unnamed (+2163), unnamed (+2363), unnamed (+2563), unnamed (+2763), unnamed (+2963), unnamed (+3563), unnamed (+3763), unnamed (+3963)
1700025G04Rik	unnamed (+371), unnamed (+571)
Cd83	unnamed (+278)
Cyp4b1	unnamed (+92), unnamed (+292), unnamed (+492), unnamed (+692), unnamed (+892), unnamed (+1092), unnamed (+1292), unnamed (+1492), unnamed (+1692), unnamed (+1892)
Angptl4	unnamed (+440)
Pnliprp2	unnamed (-7372)
Slc28a1	unnamed (-3835), unnamed (-3635), unnamed (-3435), unnamed (-3235), unnamed (-3035), unnamed (-1835), unnamed (-1635), unnamed (-235), unnamed (+165), unnamed (+365), unnamed (+565), unnamed (+765), unnamed (+965), unnamed (+1165), unnamed (+2165), unnamed (+2565), unnamed (+2765), unnamed (+3565)
Mfsd7c	unnamed (-502), unnamed (-308), unnamed (-114), unnamed (+80)
Errfi1	unnamed (-1125), unnamed (-925), unnamed (-725), unnamed (-525), unnamed (-325), unnamed (-125)
Ndrg1	unnamed (+261), unnamed (+461), unnamed (+661), unnamed (+1061)
Pros1	unnamed (-2592), unnamed (+18), unnamed (+213), unnamed (+408)
Klf15	unnamed (+128), unnamed (+328), unnamed (+528), unnamed (+728), unnamed (+928), unnamed (+1328)
Cyp2c29	unnamed (+494)
Tm4sf4	unnamed (-5086), unnamed (-4310), unnamed (-4116), unnamed (-530), unnamed (-330), unnamed (+70), unnamed (+270), unnamed (+470), unnamed (+670), unnamed (+870), unnamed (+1070)
Akr1c13	unnamed (+264), unnamed (+452), unnamed (+640), unnamed (+828), unnamed (+1204)
Fkbp5	unnamed (+150), unnamed (+328), unnamed (+506)
Mt1	unnamed (-887), unnamed (-687), unnamed (-487), unnamed (+913), unnamed (+3257), unnamed (+3657), unnamed (+3857), unnamed (+4057), unnamed (+4457), unnamed (+7062), unnamed (+7262)
Akr1c19	unnamed (+5161), unnamed (+5361), unnamed (+5561), unnamed (+5761), unnamed (+5961), unnamed (+6161), unnamed (+6361), unnamed (+6561)
Mt2	unnamed (-389), unnamed (-203), unnamed (+169), unnamed (+355), unnamed (+541)

## Sheet: Sup. Table S6 CV H3K27ac Genes
Supplemental Table S6: Genes associated with differential H3K27ac sites (FDR < 0.01) (related to Fig. 3)
Genes associated with H3K27ac regions induced by the microbiota							Association rule: Single nearest gene: 10000 bp max extension, curated regulatory domains included
Gene Name	Peak Locations relative to TSS
Reg3b	unnamed (+76), unnamed (+276), unnamed (+476), unnamed (+876), unnamed (+1076), unnamed (+1276), unnamed (+1476), unnamed (+1676), unnamed (+1876), unnamed (+2076), unnamed (+2276), unnamed (+2476), unnamed (+2676)
Reg3g	unnamed (-821), unnamed (-21), unnamed (+179), unnamed (+379), unnamed (+779), unnamed (+979), unnamed (+1779), unnamed (+1979), unnamed (+2179), unnamed (+2379), unnamed (+2579)
Alpk1	unnamed (-208), unnamed (+192), unnamed (+392), unnamed (+592), unnamed (+792), unnamed (+1192)
Slfn5	unnamed (+545), unnamed (+729)
Tifa	unnamed (-152), unnamed (+248), unnamed (+448)
Ifi44	unnamed (+157), unnamed (+314)
Dao	unnamed (+465), unnamed (+662)
Kctd14	unnamed (+357), unnamed (+555), unnamed (+753), unnamed (+951), unnamed (+1149), unnamed (+1347)
Slc16a6	unnamed (+429), unnamed (+629), unnamed (+829), unnamed (+1029), unnamed (+1229), unnamed (+1429), unnamed (+1629), unnamed (+1829), unnamed (+2029), unnamed (+2629), unnamed (+3229)
Arsg	unnamed (-14), unnamed (+186), unnamed (+386), unnamed (+586), unnamed (+786), unnamed (+986), unnamed (+1186), unnamed (+1986), unnamed (+2186), unnamed (+5755)
Casp4	unnamed (+260), unnamed (+460), unnamed (+660), unnamed (+1060), unnamed (+1260)
Gm14446	unnamed (-3126), unnamed (-2938), unnamed (-2374), unnamed (-2186), unnamed (-12), unnamed (+388), unnamed (+588), unnamed (+788), unnamed (+988)
Ptafr	unnamed (+1504), unnamed (+1700), unnamed (+1896)
Mcoln3	unnamed (-3845)
Slitrk6	unnamed (+600)
Ddx60	unnamed (+544)
Zbp1	unnamed (-632), unnamed (-232), unnamed (-32), unnamed (+368), unnamed (+568), unnamed (+768), unnamed (+968)
4930402H24Rik	unnamed (+372)
Ssh1	unnamed (+1060), unnamed (+1260), unnamed (+4678)
Slc9a3	unnamed (+539), unnamed (+739), unnamed (+1339), unnamed (+1539), unnamed (+2139), unnamed (+2339), unnamed (+2539), unnamed (+2739), unnamed (+2939), unnamed (+3139), unnamed (+3339)
Krt222	unnamed (+33), unnamed (+233)
Smpdl3a	unnamed (+12), unnamed (+208), unnamed (+404), unnamed (+600), unnamed (+796)
Naip1	unnamed (-6245), unnamed (-6045), unnamed (-5845), unnamed (-5645)
Bcl9	unnamed (-5736), unnamed (-5543), unnamed (-4771)
Kazn	unnamed (+773), unnamed (+973), unnamed (+1173)
Dio1	unnamed (+82), unnamed (+282)
Pigr	unnamed (+562), unnamed (+1962)
Rtp4	unnamed (+817)
Ccne2	unnamed (-7905)
Mov10	unnamed (-2747)
Cd38	unnamed (-9802)
Card14	unnamed (+6130), unnamed (+6330), unnamed (+6530)
Rabl5	unnamed (+98), unnamed (+292)
Ppard	unnamed (-1151), unnamed (+569), unnamed (+769)
Tha1	unnamed (-8334)
Spsb1	unnamed (+852)
Sort1	unnamed (+448)
Prss30	unnamed (+7626)
Sema6d	unnamed (-670), unnamed (+530), unnamed (+730)
Ptk6	unnamed (+747), unnamed (+947)
B930041F14Rik	unnamed (+1917)
Mfsd4	unnamed (+51), unnamed (+248), unnamed (+445), unnamed (+642), unnamed (+4945), unnamed (+5145), unnamed (+5345), unnamed (+5945), unnamed (+6145), unnamed (+6345), unnamed (+6545), unnamed (+6745), unnamed (+6945), unnamed (+7145), unnamed (+8545), unnamed (+8745), unnamed (+8945), unnamed (+9145), unnamed (+9345), unnamed (+9545), unnamed (+9745)
Slc35f2	unnamed (+1562)
Unc5cl	unnamed (+1013), unnamed (+1213)
Smox	unnamed (+558), unnamed (+3918), unnamed (+4112), unnamed (+4306)
2010002M12Rik	unnamed (+480)
Pmepa1	unnamed (+155), unnamed (+355), unnamed (+555)
Bcl3	unnamed (-9778), unnamed (+968)
Endod1	unnamed (+1535)
Fbxo32	unnamed (-23), unnamed (+176), unnamed (+6866), unnamed (+7055)
Plekha2	unnamed (-5370), unnamed (-5174)
6330416G13Rik	unnamed (+3702), unnamed (+3902)
Xaf1	unnamed (+535)
Muc13	unnamed (-9166), unnamed (-7966)
Arid3a	unnamed (+9577), unnamed (+9773), unnamed (+9969)
Dapk2	unnamed (-5125), unnamed (-4925), unnamed (-4725), unnamed (-4125), unnamed (-3925), unnamed (-3725), unnamed (-3525), unnamed (-3325)
Pm20d1	unnamed (+1350)
Slc30a10	unnamed (-4156)
Fth1	unnamed (-7340), unnamed (-7140), unnamed (-6940), unnamed (+902), unnamed (+1102), unnamed (+1302), unnamed (+1502)
Pfkfb3	unnamed (+473)
Duox2	unnamed (-186), unnamed (+14), unnamed (+214), unnamed (+414)
Baiap2l1	unnamed (-5972)
Cast	unnamed (-5400), unnamed (-5212)
Fuca1	unnamed (-2196), unnamed (-1996), unnamed (+804)
Pdk1	unnamed (-6816), unnamed (-6216)
Glipr2	unnamed (+8346), unnamed (+8546), unnamed (+8746)
Furin	unnamed (+41), unnamed (+241)
Tax1bp1	unnamed (-5538)
Dirc2	unnamed (+313)
Il4ra	unnamed (+589), unnamed (+6243), unnamed (+6443), unnamed (+6643)
Sectm1b	unnamed (-457)
Rfk	unnamed (+611), unnamed (+811)
Sectm1a	unnamed (-9525), unnamed (-4725)
Pls1	unnamed (+5898), unnamed (+6098)
Sepp1	unnamed (+1253), unnamed (+2053)
1110059E24Rik	unnamed (+5992)
Vnn1	unnamed (+724)
Ttc22	unnamed (+553)
Uqcrc1	unnamed (-6821)
E2f2	unnamed (+465), unnamed (+665), unnamed (+865)
Tcf12	unnamed (-7093), unnamed (-6901)
Vav2	unnamed (+8429), unnamed (+8629), unnamed (+8829)
4930539E08Rik	unnamed (+514), unnamed (+1114)
Eif1ad	unnamed (+8640)
Magi3	unnamed (-112)
Zcchc6	unnamed (-9854), unnamed (-9054)
Duoxa2	unnamed (-349), unnamed (-149), unnamed (+51), unnamed (+251), unnamed (+451), unnamed (+2243), unnamed (+2437)
Dnm1l	unnamed (-9045)
3830406C13Rik	unnamed (+5879), unnamed (+6072)
Nfya	unnamed (+5533)
Prdm1	unnamed (+8791), unnamed (+8991)
Sp1	unnamed (-7343)
Slk	unnamed (+83)
Npas2	unnamed (-1760), unnamed (-1560)
2016-03-07	unnamed (-229)
Hbp1	unnamed (-149)
Zxdc	unnamed (-9319)
Hsd17b6	unnamed (-2649), unnamed (-2449)
Sos2	unnamed (+109)
Dusp16	unnamed (+456)
Fam114a2	unnamed (+741)
Adck5	unnamed (-8121), unnamed (-7925), unnamed (-7729), unnamed (+622)
Opa3	unnamed (+6554)
Arih2	unnamed (-6224)
Nfil3	unnamed (-1529), unnamed (-1329), unnamed (-1129), unnamed (-529), unnamed (+471), unnamed (+671), unnamed (+871), unnamed (+1071), unnamed (+1471), unnamed (+1671), unnamed (+1871)
Gramd1b	unnamed (-253), unnamed (-53), unnamed (+147)
Brd1	unnamed (+163)
Slc25a20	unnamed (-6299)
Ang	unnamed (-1130)
1110034G24Rik	unnamed (+8746)
Mafk	unnamed (+1287), unnamed (+1484)
Rps26-ps1	unnamed (+1229), unnamed (+1429)
Csf2ra	unnamed (+4391)
Sprr2a3	unnamed (-782), unnamed (-582), unnamed (-382), unnamed (+218)
Dnase1	unnamed (-2235), unnamed (-2035)
Rac2	unnamed (-8713), unnamed (-8522)
