# Supplementary material for: Microbiota regulate intestinal epithelial gene expression by suppressing the transcription factor Hepatocyte nuclear factor 4 alpha
Source: Genome Res. 2017 Jul;27(7):1195–206. doi: 10.1101/gr.220111.116 (PMC5495071; doi:10.1101/gr.220111.116)
Supplement: Supplemental Material [file supp_gr.220111.116_Supplemental_Table_S7.xlsx]

## Sheet: Sup. Table S7 GF HNF4A Genes
Supplemental Table S7: Genes associated with GF HN4A sites (Related to Fig. 4 and Fig. 5)
Genes associated with an HNF4A site in GF							# GREAT version 3.0.0		Species assembly: mm9	Association rule: Single nearest gene: 10000 bp max extension, curated regulatory domains included
Gene Name	Peak Locations relative to TSS
0610007P14Rik	8148 (+51)
0610009B22Rik	4866 (-557)
0610009D07Rik	7187 (-304)
0610009L18Rik	7046 (+1471), 7047 (+2969), 7048 (+5056)
0610011F06Rik	14782 (-486), 14783 (+985)
0610012H03Rik	19961 (-8192), 19962 (+53)
0610039K10Rik	20881 (-7606), 20882 (-120), 20883 (+124)
0610040J01Rik	26299 (+4331), 26300 (+4839)
1100001G20Rik	5840 (+2225)
1110001J03Rik	28320 (-3483), 28321 (-3110), 28322 (+403)
1110002L01Rik	7160 (-65), 7159 (+3996)
1110004E09Rik	14154 (+7868)
1110007C09Rik	9303 (-4789), 9302 (-231), 9301 (+135), 9300 (+2352)
1110008F13Rik	20741 (+985)
1110017D15Rik	23443 (-2047)
1110034G24Rik	20381 (-5578), 20382 (-4517), 20383 (-4097), 20384 (+9923)
1110051M20Rik	19844 (-5886), 19843 (-5223)
1110058L19Rik	99 (-140)
1110059E24Rik	17792 (-65), 17791 (+6509)
1110059G10Rik	36307 (+33)
1190002N15Rik	35699 (+401), 35698 (+829), 35697 (+1092)
1190003J15Rik	32146 (+888)
1190007I07Rik	3546 (-359), 3545 (+85)
1200014J11Rik	5497 (+77)
1300018J18Rik	12718 (+865)
1500012F01Rik	20995 (-7177), 20996 (-1027), 20997 (-351)
1500035N22Rik	25791 (-9568), 25792 (-5964)
1600002H07Rik	14738 (-162)
1600012H06Rik	14633 (+3491)
1600014C10Rik	30570 (-206), 30571 (+975)
1600015I10Rik	28509 (-5292)
1700001C19Rik	15437 (-8379), 15436 (-4274), 15435 (-2120), 15434 (-1447)
1700003E16Rik	28915 (+5670), 28916 (+6195), 28917 (+6481)
1700006E09Rik	6450 (-808)
1700007G11Rik	26808 (+114)
1700009P17Rik	1931 (-7715), 1932 (+9524)
1700010L04Rik	31061 (+4604)
1700011A15Rik	12983 (+928)
1700011L22Rik	33220 (-838)
1700016C15Rik	2018 (-3706), 2019 (-1610)
1700016H13Rik	26926 (+108)
1700016K19Rik	5581 (+9542)
1700018A14Rik	16639 (+722), 16640 (+5782)
1700018C11Rik	23856 (-3359)
1700019D03Rik	337 (-1966), 336 (-551)
1700019G17Rik	28976 (+23), 28975 (+2333), 28974 (+3428)
1700020L24Rik	5833 (+2811)
1700020N01Rik	2566 (+2444), 2567 (+8008)
1700021F05Rik	2864 (+65), 2863 (+3175)
1700021K19Rik	13676 (-4173), 13675 (-2157), 13674 (+552)
1700022P22Rik	2198 (-61), 2199 (+6599)
1700024P04Rik	9930 (+8222)
1700025G04Rik	1602 (+5033), 1601 (+5608)
1700028J19Rik	30598 (-4810)
1700029P11Rik	12525 (-2839), 12526 (+4305)
1700034H15Rik	2254 (-3325)
1700039E15Rik	30637 (-94)
1700040L02Rik	3147 (+370)
1700041G16Rik	32588 (-288)
1700049G17Rik	30369 (-4232)
1700052N19Rik	2341 (+108)
1700055N04Rik	17316 (-9918)
1700057G04Rik	35681 (-9430), 35682 (-4295)
1700064H15Rik	21378 (-1629), 21377 (+539)
1700067K01Rik	33283 (+2221)
1700080E11Rik	35876 (+5810)
1700084C01Rik	1894 (-6558), 1895 (-1493)
1700093K21Rik	4659 (-4346)
1700101E01Rik	19050 (-26)
1810011O10Rik	32605 (-581), 32604 (+7162), 32603 (+7471), 32602 (+8706)
1810013L24Rik	13137 (-1015), 13138 (+7130)
1810019J16Rik	24864 (-6368), 24865 (-5908), 24866 (-283)
1810024B03Rik	20263 (+173)
1810032O08Rik	6870 (-300), 6871 (+3169)
1810037I17Rik	22735 (-2114)
1810043H04Rik	7028 (+571), 7029 (+2352)
1810046K07Rik	34891 (+4161), 34890 (+5492)
1810055G02Rik	17290 (+45), 17291 (+845), 17292 (+1259), 17293 (+2432)
2010001E11Rik	2735 (+2251)
2010003K11Rik	17365 (+28), 17364 (+1531)
2010016I18Rik	22455 (-143), 22454 (+932), 22453 (+6355)
2010106E10Rik	36717 (-8017), 36718 (-28)
2010107E04Rik	8539 (+53)
2010107G12Rik	28271 (-8750), 28270 (+7079)
2010107G23Rik	3075 (-24), 3074 (+549)
2010109I03Rik	12171 (+3153), 12170 (+4552)
2200002D01Rik	30448 (-6035), 30447 (-5653), 30446 (-2973), 30445 (-40), 30444 (+3297), 30443 (+4077)
2210016F16Rik	9471 (-555), 9470 (+43), 9469 (+1842)
2210016L21Rik	27116 (-9122), 27117 (-8721)
2210018M11Rik	31273 (+4194)
2210404O07Rik	3517 (-334), 3518 (+923), 3519 (+6977)
2210404O09Rik	14688 (-1527)
2210407C18Rik	5091 (-3346), 5090 (-2431), 5089 (+1353), 5088 (+4501)
2300009A05Rik	35235 (-372), 35234 (+256), 35233 (+7722), 35232 (+9530)
2310001K24Rik	20860 (-9185), 20861 (-664)
2310005G13Rik	13989 (-8403)
2310007B03Rik	970 (-7273), 969 (-5), 968 (+3138), 967 (+4177)
2310008H04Rik	13273 (+141)
2310011J03Rik	3427 (-3438), 3426 (-158)
2310016G11Rik	30610 (+6652)
2310030G06Rik	34869 (-144), 34868 (+6230)
2310033P09Rik	5108 (+1023), 5109 (+2897)
2310036O22Rik	33326 (-85), 33327 (+812)
2310039H08Rik	15420 (+773)
2310042D19Rik	25653 (-6857)
2310044G17Rik	8161 (-287)
2310047M10Rik	5340 (-5885), 5341 (-637)
2310057M21Rik	32004 (-1648), 32003 (+93)
2310061I04Rik	15270 (+610)
2310061N02Rik	14134 (-2970)
2310079G19Rik	14131 (-4051)
2410002F23Rik	30599 (-1447)
2410004B18Rik	23055 (-4033)
2410015M20Rik	15571 (-42)
2410016O06Rik	8058 (+798)
2410017I17Rik	15287 (-9561), 15288 (-8887), 15289 (-6173), 15290 (-3447), 15291 (+2085), 15292 (+6539)
2410066E13Rik	28649 (+65)
2410124H12Rik	14245 (+8580)
2510039O18Rik	25325 (-329), 25326 (+99), 25327 (+457)
2510049J12Rik	29409 (+754), 29408 (+7095)
2610001J05Rik	28094 (+54)
2610002J02Rik	25577 (+846)
2610015P09Rik	13883 (+169)
2610021A01Rik	30582 (+78)
2610028H24Rik	3282 (-2879)
2610034B18Rik	30959 (-356)
2610507B11Rik	5680 (-7480)
2610524H06Rik	27110 (-2682)
2610528J11Rik	24474 (-121)
2700050L05Rik	32052 (-136), 32053 (+1028)
2700060E02Rik	10372 (-172), 10371 (+1038)
2700062C07Rik	16357 (-3865)
2700089E24Rik	29723 (-151)
2810006K23Rik	27362 (+9525)
2810403A07Rik	22065 (-1461)
2810407C02Rik	21735 (+302), 21736 (+6680)
2810408A11Rik	5392 (+49), 5391 (+424)
2810408M09Rik	20945 (-4527)
2810417H13Rik	35331 (+1788), 35332 (+6926), 35333 (+7237)
2810459M11Rik	767 (-5492), 768 (-4977), 769 (-4615), 770 (+1494)
2810474O19Rik	30037 (+24)
2900026A02Rik	27057 (-8799), 27056 (+9912)
2900060B14Rik	1101 (-438), 1100 (+7366), 1099 (+9675)
3010026O09Rik	4843 (-7616)
3110001D03Rik	23890 (-121)
3110001I22Rik	13248 (+990)
3110009E18Rik	1143 (+3794), 1144 (+5212)
3110021A11Rik	29485 (+389)
3110040N11Rik	31046 (+1963)
3110057O12Rik	21591 (-1799), 21592 (-226), 21593 (+246)
3110062M04Rik	28267 (-6874), 28266 (-97)
3110079O15Rik	833 (+2622)
3230401D17Rik	20859 (-4157), 20858 (+220)
3300002I08Rik	20574 (+3390), 20573 (+5006), 20572 (+5397)
3632451O06Rik	10807 (+340)
3830408C21Rik	10044 (-4570), 10045 (+3959), 10046 (+7792)
4430402I18Rik	17889 (-2137), 17888 (-372)
4632404H12Rik	22113 (-31)
4632415L05Rik	21381 (+113)
4731417B20Rik	27599 (-2742)
4732465J04Rik	3768 (-3201)
4732471J01Rik	30303 (-5343), 30304 (-2986), 30305 (+3993), 30306 (+4914), 30307 (+5434)
4833420G17Rik	10195 (-84)
4833439L19Rik	9385 (-1024), 9384 (+857)
4921507P07Rik	28560 (-447)
4921524J17Rik	33335 (-8098), 33334 (-3103)
4922502D21Rik	29710 (-2305)
4930402H24Rik	20329 (-1279)
4930404N11Rik	3516 (-422)
4930427A07Rik	8573 (-1146)
4930432M17Rik	22631 (+5272)
4930444A02Rik	32652 (+3994)
4930444G20Rik	2587 (+9245)
4930447A16Rik	11887 (+7361)
4930449A18Rik	21742 (+4732)
4930449E01Rik	11485 (+3363)
4930500M09Rik	1901 (-8257)
4930510E17Rik	34899 (+7814)
4930512B01Rik	7750 (-4817), 7751 (+21)
4930529M08Rik	20544 (-98)
4930539E08Rik	14935 (-9846), 14934 (+1203), 14933 (+1911), 14932 (+2326), 14931 (+5062)
4930553M12Rik	23977 (+6648)
4930558K02Rik	1751 (+3267)
4930562F07Rik	1713 (-1733)
4930563D23Rik	14237 (+4884)
4930589L23Rik	21899 (+328)
4930595D18Rik	8494 (-4008)
4930597O21Rik	28762 (-7511), 28761 (-1548)
4931406C07Rik	34428 (-90)
4931440P22Rik	21817 (-4728)
4932418E24Rik	18949 (-1783)
4932431P20Rik	30469 (+2611)
4932438A13Rik	21559 (-330)
4932438H23Rik	14165 (-4438)
4932442E05Rik	4037 (-5975), 4038 (+694), 4039 (+1055)
4932443I19Rik	32506 (-7408), 32507 (-6741)
4933411G06Rik	2922 (-6283)
4933411K16Rik	18220 (-1846)
4933411K20Rik	32843 (-2140), 32844 (-1524), 32845 (-90)
4933416C03Rik	3966 (-2148)
4933422H20Rik	6770 (-7553), 6771 (+7054), 6772 (+7817), 6773 (+9512), 6774 (+9827)
4933426M11Rik	7969 (-8123), 7970 (-2701), 7971 (+1488), 7972 (+2161)
4933427E11Rik	12169 (-795)
4933428G20Rik	6222 (+2636)
4933430I17Rik	23834 (+2763)
4933434E20Rik	22117 (+123)
4933440N22Rik	29462 (-9268), 29461 (+847)
5031425E22Rik	25764 (+800), 25763 (+4744)
5031434C07Rik	29326 (-4782)
5031439G07Rik	12614 (-606)
5033411D12Rik	8767 (+168)
5330426P16Rik	13936 (+200)
5430421N21Rik	12984 (-5933)
5430427O19Rik	36628 (+5765)
5730409E04Rik	24644 (-5564), 24645 (+2106)
5730455P16Rik	5798 (+2)
5730460C07Rik	23138 (+9570)
5730522E02Rik	4685 (+499)
5730559C18Rik	1524 (-547), 1523 (+5671)
5730596B20Rik	28572 (+5913)
5930403N24Rik	2712 (+8677)
6030419C18Rik	35064 (+8800)
6030445D17Rik	25008 (-9991), 25009 (-9706), 25010 (-9301), 25011 (-743), 25012 (+36), 25013 (+2058)
6030468B19Rik	6920 (-6764), 6921 (-5327)
6330409D20Rik	19214 (+4397)
6330416G13Rik	23850 (-90), 23851 (+3194), 23852 (+3514)
6330444E15Rik	30470 (+1411)
6430548M08Rik	33965 (-685), 33966 (-336)
6430550D23Rik	20730 (-32)
6530403G13Rik	2355 (+5438)
7420461P10Rik	1759 (-2847)
8430419L09Rik	29794 (+2270)
9030617O03Rik	8261 (-6705), 8262 (-6320), 8263 (-3185), 8264 (-53), 8265 (+6501)
9030619P08Rik	12186 (+811)
9130008F23Rik	15319 (-123), 15318 (+6644)
9130011E15Rik	18330 (+157)
9130017N09Rik	3370 (-9220), 3371 (-6637), 3372 (-51), 3373 (+1519), 3374 (+2177), 3375 (+3009), 3376 (+3572)
9130019O22Rik	31895 (+122), 31894 (+598)
9130023H24Rik	31951 (-518), 31950 (+99)
9130230L23Rik	26417 (-9854), 26416 (-43), 26415 (+9647)
9130409I23Rik	2081 (-9719)
9230112D13Rik	10671 (-243)
9230112E08Rik	21250 (-2828)
9430015G10Rik	25642 (-9334), 25643 (-6501), 25644 (-655)
9430016H08Rik	384 (+372)
9430023L20Rik	12978 (-346)
9430038I01Rik	32092 (-294), 32091 (+193), 32090 (+3204)
9530077C05Rik	34505 (+9084)
9930012K11Rik	11247 (-8123), 11246 (+2061)
9930013L23Rik	31089 (-3530)
9930021J03Rik	17935 (-610)
9930111J21Rik1	4817 (+174)
9930111J21Rik2	4818 (+144)
A130010J15Rik	2285 (-6209), 2286 (-3351), 2287 (+5320), 2288 (+7860)
A1cf	17952 (-17), 17953 (+9379)
A230046K03Rik	3571 (0)
A230052G05Rik	33105 (+2678), 33106 (+3080)
A230083G16Rik	29590 (-626)
A330017A19Rik	15427 (+864)
A430005L14Rik	25521 (+170), 25522 (+511)
A430105I19Rik	20063 (-4263), 20062 (-2847), 20061 (-134)
A630001G21Rik	755 (-8830), 754 (-8207), 753 (-264)
A630007B06Rik	18539 (-367), 18538 (+895), 18537 (+5812), 18536 (+8707)
A730018C14Rik	8550 (+3728)
A730020M07Rik	22630 (-3284)
A830080D01Rik	36776 (-170)
A930005H10Rik	22578 (+148)
A930018M24Rik	10816 (+1458)
A930018P22Rik	19948 (-756), 19949 (+1063)
A930033H14Rik	3149 (-6072)
AA386476	32890 (+140)
AA986860	1270 (+148), 1271 (+1245), 1272 (+6155), 1273 (+7004)
AB041803	28238 (+1907)
AF529169	35670 (-3838)
AI314180	23769 (-881), 23768 (-28)
AI464131	23442 (-210), 23441 (+2211)
AI597468	3596 (+1211), 3597 (+6980)
AI661453	15433 (-321)
AI747448	23041 (-59), 23040 (+2630)
AU019823	34864 (+25)
AU023871	15210 (+1484), 15209 (+3502)
AU040320	24647 (+498), 24648 (+9215), 24649 (+9963)
AW112010	17645 (-2607), 17644 (+943), 17643 (+5471)
AW822073	2952 (+310), 2951 (+1683)
AY074887	34940 (-9982), 34939 (-9703), 34938 (-152)
Aacs	27407 (-8382)
Aak1	29025 (+2130)
Aamdc	31212 (+326)
Aars2	15371 (-24), 15372 (+8220)
Aatf	5867 (+4421)
Abat	13118 (-149)
Abca13	4490 (-2225)
Abca15	31740 (-2583)
Abca2	18922 (+7671)
Abca6	6681 (+6836)
Abcb10	34142 (+4314), 34141 (+9389)
Abcb1a	25698 (-54), 25699 (+8025)
Abcb4	25700 (+143)
Abcb7	36699 (+277)
Abcb8	25769 (+596), 25770 (+2887)
Abcb9	27359 (+3792)
Abcc10	15411 (+5350)
Abcc2	18258 (-9743), 18259 (-6562), 18260 (-4591), 18261 (-33), 18262 (+4214)
Abcc3	6085 (-40), 6084 (+2265), 6083 (+2753)
Abcc6	30689 (-141), 30688 (+1473)
Abcd3	22648 (-6704), 22647 (-5402), 22646 (-3084), 22645 (-4), 22644 (+485), 22643 (+783), 22642 (+9589)
Abcd4	8104 (-7257), 8103 (+160)
Abcf1	15274 (+413)
Abcf2	25776 (-105)
Abcf3	13407 (-1010), 13408 (-21)
Abcg2	28698 (-2650)
Abcg4	34731 (+2706)
Abcg5	15928 (-5), 15927 (+9284), 15926 (+9690)
Abcg8	15929 (+6450)
Abhd11	27506 (-7841), 27507 (-6824), 27508 (-341), 27509 (+3758)
Abhd12	20589 (-2130), 20588 (+2358), 20587 (+4259), 20586 (+7634)
Abhd14a	35896 (+45), 35895 (+1143), 35894 (+2763)
Abhd15	5648 (+632)
Abhd16a	15212 (-98)
Abhd17a	3448 (+1535), 3447 (+4068), 3446 (+5913)
Abhd17c	31100 (-1119), 31099 (+1035), 31098 (+6061)
Abhd2	30928 (-5991), 30929 (-4950), 30930 (-600), 30931 (+6387)
Abhd3	16151 (+262)
Abhd4	10864 (+1611)
Abhd5	36303 (+164)
Abhd6	10224 (+10)
Abi3bp	13972 (-9730)
Abl1	19147 (-1137)
Abp1	28507 (-13)
Abr	5602 (+2912), 5601 (+4559)
Abracl	2474 (+224)
Abtb2	19938 (+853)
Acaa1a	36181 (-59), 36182 (+1660), 36183 (+3030), 36184 (+4205)
Acaa1b	36172 (-8694), 36171 (-7941), 36170 (+1468)
Acaa2	17129 (+1241), 17130 (+2707), 17131 (+7787)
Acacb	27094 (-7870), 27095 (-7572), 27096 (-683), 27097 (-387)
Acad11	35863 (+1055)
Acad12	27260 (-6820), 27259 (-4828), 27258 (-164)
Acad9	21550 (+62)
Acadl	561 (+107), 560 (+442)
Acadm	23140 (+34), 23139 (+4044)
Acads	27141 (+322)
Acap2	13613 (-915)
Acat1	34909 (+2946), 34908 (+5182)
Acat2	14549 (-176)
Acat3	14548 (-194)
Acbd3	2063 (-5864), 2064 (+371)
Acbd4	6482 (+1348), 6483 (+2206), 6484 (+2987), 6485 (+3854)
Acbd5	18857 (-681), 18858 (+9677)
Accs	19896 (+57)
Ace	6543 (-6164), 6544 (-110), 6545 (+1325)
Ace2	36791 (-3805), 36792 (-2619), 36793 (+1235), 36794 (+6410)
Ace3	6546 (-8638)
Acer1	15586 (-2989), 15585 (-2178), 15584 (-515), 15583 (+1061)
Acer2	23960 (+1362)
Acer3	31251 (+65)
Ache	27626 (-7339)
Acly	6376 (+9732)
Acn9	28071 (+17)
Aco1	23383 (-2931), 23384 (+567), 23385 (+764), 23386 (+1334)
Acot1	8060 (-8939), 8061 (-3883), 8062 (+9)
Acot11	24215 (-7083), 24214 (-5360), 24213 (-490), 24212 (+773), 24211 (+7258), 24210 (+8711)
Acot12	9745 (-88)
Acot13	8864 (+149)
Acot4	8065 (-5327), 8066 (+106)
Acot8	20920 (+116)
Acot9	36774 (+5678)
Acox1	6828 (-4398), 6827 (-1812), 6826 (-687), 6825 (-123)
Acox2	10246 (-11), 10245 (+8890)
Acox3	26062 (+9980)
Acp2	19833 (-428), 19834 (+85)
Acp5	34500 (-3759), 34499 (-2862), 34498 (+121)
Acp6	22290 (-7475), 22291 (-2132), 22292 (+625), 22293 (+927)
Acpl2	35750 (-354)
Acpp	35873 (-1979), 35872 (+377)
Acpt	30600 (+822)
Acsf2	6097 (+4321)
Acsl1	32858 (-455), 32859 (+6902), 32860 (+8954)
Acsl5	18466 (-5422), 18467 (-1441), 18468 (+229), 18469 (+4585), 18470 (+5863)
Acsl6	4981 (+5753), 4982 (+9023)
Acsm2	31717 (-2947), 31718 (-2241)
Acsm3	31720 (+8972), 31721 (+9191)
Acsm5	31715 (-128), 31716 (+1020)
Acss1	20580 (+1074), 20579 (+2106)
Acss2	20708 (+295)
Acta1	34138 (-1777), 34137 (-631), 34136 (-298)
Acta2	18036 (-7099)
Actb	27796 (-5916), 27795 (-5154), 27794 (-3251), 27793 (-2646), 27792 (-2326), 27791 (-1699), 27790 (+4456)
Actbl2	10092 (+8619)
Actg1	7045 (+4618), 7044 (+8143)
Actl11	35946 (+3285)
Actn4	30435 (-8999), 30434 (-7624), 30433 (+314), 30432 (+3347)
Actr2	4542 (-4613), 4541 (-67)
Actr3	1163 (-423), 1162 (+9075)
Actrt3	21504 (+7241)
Acvr1b	12969 (-6630), 12970 (+2997), 12971 (+6617)
Acvr1c	19428 (-3634)
Acvr2a	19358 (-7820), 19359 (+288)
Acy1	35893 (-935), 35892 (-253), 35891 (+54), 35890 (+1108), 35889 (+2414)
Acy3	17317 (-1240), 17318 (-164)
Ada	20890 (-5740), 20889 (-1786)
Adad2	33945 (+556)
Adam15	22099 (-5756), 22098 (-5075), 22097 (-3686), 22096 (-1521)
Adam1b	27254 (-7153)
Adam2	11146 (-5902), 11145 (-5128), 11144 (-4569), 11143 (+1844)
Adam24	32757 (+133)
Adam4	7991 (-2199)
Adamts16	9586 (+1659)
Adamts17	30830 (+7064)
Adamtsl4	22240 (-6267), 22239 (+7448)
Adamtsl5	3435 (-3555), 3434 (-35), 3433 (+3799), 3432 (+6136), 3431 (+6871)
Adap1	27700 (-7219), 27699 (-6237), 27698 (-124), 27697 (+8215)
Adap2	5793 (+5140), 5794 (+5585)
Adat2	2429 (-236)
Adc	24672 (-6858), 24671 (+5012)
Adck3	2049 (+763)
Adck5	12257 (-1196), 12258 (+2557), 12259 (+2927)
Adcy6	12842 (-9548), 12841 (-7534), 12840 (-672)
Adcy9	13071 (-6040), 13070 (-115)
Add1	26052 (-316)
Add3	18404 (+9045)
Adh1	22955 (+1337)
Adh4	22965 (-5067)
Adh6a	22958 (-3247), 22959 (-2240), 22960 (-675), 22961 (-189)
Adh7	22948 (+4868), 22949 (+7860), 22950 (+8138)
Adipor1	1439 (+5374), 1440 (+6344)
Adipor2	29475 (-3689), 29474 (+7502), 29473 (+9448)
Adk	10422 (+215)
Adm	31492 (-2728), 31493 (-1546), 31494 (+7333)
Adnp	21073 (-89), 21072 (+2390)
Adnp2	17194 (-1889)
Adora1	1431 (-2254), 1430 (+8596)
Adora2b	5222 (-9603), 5223 (-7939), 5224 (-5157), 5225 (+496)
Adora3	22451 (-9032)
Adprh	13858 (+80)
Adprm	5308 (+43), 5307 (+724)
Adrb2	16895 (-12)
Adrbk1	17348 (-9286)
Adsl	12463 (-4229), 12464 (-3401), 12465 (-937)
Adss	2024 (+2461)
Adtrp	9138 (+3275)
Aen	30922 (-754)
Aes	3539 (-1912), 3540 (-1238)
Afap1l1	16892 (+4232)
Aff1	26931 (-7895), 26932 (-11)
Aff4	4910 (+8713)
Afg3l1	34106 (+73)
Afg3l2	17026 (+1725), 17025 (+2762), 17024 (+6466)
Aftph	4580 (-830)
Agap2	4160 (+3460)
Agfg1	722 (-7458), 723 (-81)
Agl	22597 (+101)
Agmat	25218 (-6466), 25219 (-4612), 25220 (+64), 25221 (+4037)
Agmo	7496 (-404), 7497 (-110), 7498 (+218), 7499 (+3399)
Ago1	24640 (-4511), 24639 (-116)
Ago2	12140 (+6203)
Ago3	24638 (+113)
Agpat1	15182 (-972), 15183 (-411)
Agpat2	18973 (-7751), 18972 (-7318), 18971 (-6895), 18970 (-5636), 18969 (-171), 18968 (+98), 18967 (+3385), 18966 (+4172), 18965 (+8800), 18964 (+9686)
Agpat3	3334 (-5458), 3333 (-5079), 3332 (+4387)
Agpat4	14517 (-1002), 14518 (+3977)
Agpat9	26896 (+754), 26897 (+4085), 26898 (+7945)
Agphd1	34937 (+2863)
Agps	19694 (-1735), 19695 (+52)
Agrn	25651 (-6764), 25650 (-3470), 25649 (-1614)
Agtpbp1	9479 (-4437)
Agxt	966 (+3369)
Agxt2	11668 (-69)
Agxt2l2	4856 (-613), 4857 (-243), 4858 (+248), 4859 (+1038)
Ahcy	20694 (+110)
Ahcyl1	22481 (-2893), 22480 (-651), 22479 (-227), 22478 (+7069)
Ahcyl2	28203 (+7415)
Ahdc1	24822 (-3358)
Ahnak	17567 (-5883), 17568 (-327), 17569 (+91), 17570 (+3114), 17571 (+3596), 17572 (+6129)
Ahsa2	4658 (+757)
Aifm1	36532 (+271)
Aim1	2882 (+1089), 2881 (+2052)
Aim1l	24893 (-7143), 24894 (-6322), 24895 (-2789), 24896 (-982), 24897 (+769)
Aimp1	22874 (+6216)
Aimp2	27826 (+384), 27825 (+1620)
Aip	17337 (-52), 17336 (+4886)
Ajuba	10883 (-5250)
Ak2	24675 (-9408), 24676 (-3389), 24677 (-1390), 24678 (+1441), 24679 (+2225), 24680 (+2883), 24681 (+7706)
Ak3	17898 (-4965), 17897 (+16), 17896 (+1867), 17895 (+2324), 17894 (+5537), 17893 (+7157), 17892 (+7528)
Akap1	6003 (+499)
Akap11	11371 (-617), 11370 (+98)
Akap2	23730 (-9034)
Akap6	7608 (-6980)
Akap7	2650 (-668)
Akap9	25676 (-153)
Akirin1	24574 (-8233)
Akirin2	23340 (+141), 23341 (+1080), 23342 (+3847)
Aknad1	22543 (-1186)
Akp3	822 (-110)
Akr1a1	24376 (-9233), 24375 (-8494), 24374 (-3569), 24373 (-255), 24372 (+260), 24371 (+1124), 24370 (+2048)
Akr1b7	28252 (-208), 28253 (+565), 28254 (+1223)
Akr1c14	8659 (-128)
Akr1c19	8665 (+5256), 8666 (+6512)
Akr1c21	8671 (+5429)
Akr1cl	542 (-4881)
Akr1e1	8673 (-9885), 8672 (+2134)
Akr7a5	25140 (+609), 25141 (+1502), 25142 (+2237)
Akt2	30365 (+1876)
Aktip	33409 (+49), 33408 (+9413), 33407 (+9885)
Alad	23832 (+2874)
Alas1	35885 (-3118), 35884 (-2425), 35883 (-1211), 35882 (-284)
Alcam	13947 (+1755), 13946 (+7881)
Aldh16a1	30636 (+85)
Aldh18a1	18188 (-7023), 18187 (+721), 18186 (+1331), 18185 (+3375), 18184 (+3926), 18183 (+7371)
Aldh1b1	23525 (-9163), 23526 (-8676), 23527 (-3427), 23528 (-984), 23529 (+1091)
Aldh1l1	29090 (-6156), 29091 (-4281), 29092 (+13)
Aldh2	27256 (+9629)
Aldh3a2	5182 (-4573), 5181 (-1957), 5180 (+188), 5179 (+480)
Aldh3b1	17314 (+116), 17313 (+6590), 17312 (+6950)
Aldh4a1	25147 (+81), 25148 (+4714), 25149 (+5716), 25150 (+6351), 25151 (+7506)
Aldh7a1	16757 (-36)
Aldh9a1	1865 (-9655), 1866 (-8095), 1867 (-7658), 1868 (-3560), 1869 (-173), 1870 (+96), 1871 (+4076), 1872 (+4583)
Aldoa	31864 (-8007)
Aldoart2	7676 (-4793)
Aldob	23603 (-8775), 23602 (-6911), 23601 (-4005), 23600 (+5), 23599 (+2173), 23598 (+3270), 23597 (+3548)
Alg14	22623 (-112)
Alkbh2	27093 (+8915)
Alkbh3	19897 (+53)
Alkbh5	5158 (-49)
Alkbh7	15587 (-134)
Alkbh8	34349 (-7525), 34350 (+6797)
Alox12	5407 (+3637)
Aloxe3	5345 (-1224), 5346 (-698)
Alpi	821 (-6834), 820 (-3511), 819 (-680), 818 (+45), 817 (+1260)
Alpk2	16981 (-3934)
Alppl2	816 (-4463), 815 (-199), 814 (+3523)
Als2	438 (-939)
Als2cl	36049 (+32), 36050 (+9669)
Als2cr12	407 (-4808), 406 (+3923), 405 (+4959), 404 (+5385)
Alyref2	1960 (-1366), 1961 (+187), 1962 (+507)
Amacr	11682 (+4180)
Ambra1	19856 (-121)
Amdhd2	14733 (+9255)
Amer2	11043 (-7380)
Amfr	33460 (+1440)
Amhr2	13019 (-2623), 13020 (+6014)
Amigo3	35952 (+759), 35953 (+5969)
Ammecr1l	16368 (+5364)
Amn	8498 (-3031), 8499 (+39), 8500 (+1543)
Amn1	30036 (-4902), 30035 (-3245)
Amotl2	35830 (-682), 35831 (-7), 35832 (+8886)
Ampd2	22518 (-156)
Amz2	6656 (-332)
Anapc15	31402 (-5431)
Anapc15-ps	3756 (-7672), 3755 (-7175)
Anapc5	27320 (+247)
Ang	10827 (-1266)
Angel1	8151 (+196)
Angel2	2195 (-8139)
Angptl4	15129 (-7305), 15128 (-1321), 15127 (+5836), 15126 (+6715), 15125 (+7194), 15124 (+7947)
Ank3	3151 (-69)
Ankhd1	16500 (+1572), 16501 (+7937)
Ankib1	25673 (+434), 25672 (+5937)
Ankle1	33115 (-2542)
Ankmy2	7485 (+8454)
Ankrd10	32457 (-443), 32456 (+2356)
Ankrd11	34070 (-8824)
Ankrd13c	23152 (-265), 23153 (+653)
Ankrd28	10627 (+387)
Ankrd29	16217 (+6228)
Ankrd37	32833 (-164)
Ankrd39	176 (+92)
Ankrd40	6077 (+407), 6078 (+2521), 6079 (+6516)
Ankrd46	11842 (-3294), 11841 (-2062), 11840 (+5166)
Ankrd50	21580 (+7337)
Ankrd54	12384 (-5830), 12383 (+145)
Ankrd61	27824 (+2654), 27823 (+4109)
Ankrd9	8481 (-4198), 8480 (-2797), 8479 (-765), 8478 (+165)
Anks1	14876 (+4326)
Anks4b	31736 (-92)
Ankzf1	647 (+9173)
Ano10	36300 (-1219), 36299 (+5872), 36298 (+8432), 36297 (+9611)
Ano6	12775 (+3322), 12776 (+3947)
Ano7	974 (+3252)
Ano9	32169 (-5054), 32168 (-3429), 32167 (+1119), 32166 (+1973)
Anp32a	35200 (-102), 35201 (+3915)
Anpep	30946 (+5565), 30945 (+5874)
Antxr2	26807 (+212), 26806 (+646), 26805 (+2812)
Anxa11	10515 (+302), 10516 (+2453), 10517 (+3651), 10518 (+7140)
Anxa13	12004 (-1167)
Anxa2	35411 (+1926), 35412 (+3201), 35413 (+4175), 35414 (+4520), 35415 (+6346)
Anxa4	29022 (-8043), 29021 (-2508), 29020 (+78), 29019 (+1000), 29018 (+3633), 29017 (+4582), 29016 (+9826)
Anxa9	22214 (+5824), 22213 (+8432)
Aoah	8795 (-6962)
Ap1ar	22792 (-310), 22791 (+3246), 22790 (+4204), 22789 (+6993)
Ap1b1	4392 (+255)
Ap1g1	33691 (+80)
Ap1g2	10909 (-1675), 10908 (+26)
Ap1m1	33138 (-435), 33139 (+319), 33140 (+3012)
Ap1m2	34471 (-1170)
Ap1s1	27620 (-5931)
Ap1s3	692 (-8983), 691 (-7263)
Ap2a1	30622 (+6603)
Ap2a2	32211 (-6218), 32212 (+1155), 32213 (+7451)
Ap2b1	5830 (+2421), 5831 (+5532)
Ap2m1	13405 (+242), 13406 (+1040)
Ap2s1	30165 (+7171)
Ap3b1	9803 (+6257)
Ap3m1	10421 (+499)
Ap3s2	30958 (-4489), 30957 (-70)
Ap4m1	27655 (-723), 27656 (+153)
Ap5b1	17409 (-576)
Ap5s1	20337 (-1204), 20338 (+79), 20339 (+6253)
Ap5z1	27770 (-214)
Apba3	3511 (+70)
Apbb1	31440 (-7044)
Apbb2	26448 (-1537), 26447 (-115), 26446 (+433), 26445 (+3608)
Apbb3	16507 (-103)
Apc	16423 (-233), 16424 (+5549)
Apc2	3425 (+6572)
Apcdd1	16898 (+3031)
Apeh	35955 (-686)
Aplp1	30484 (-1462), 30483 (-241)
Apoa1	34813 (-7038), 34814 (-4760), 34815 (-4128), 34816 (-3444), 34817 (-1360), 34818 (-2), 34819 (+1723), 34820 (+2871)
Apoa1bp	22022 (+182)
Apoa4	34823 (-1647), 34824 (+134), 34825 (+1317)
Apoa5	34826 (-3024)
Apob	7213 (-196), 7214 (+980), 7215 (+1482), 7216 (+6958)
Apobec1	29536 (-2447), 29535 (+8166), 29534 (+8742)
Apobec2	15470 (-6110), 15469 (-3420), 15468 (-1279), 15467 (+3155)
Apoc1	30235 (-2613), 30234 (-1906), 30233 (+1288), 30232 (+1683)
Apoc2	30229 (-1290), 30228 (-718), 30227 (+148), 30226 (+2154)
Apoc3	34822 (-2373), 34821 (-322)
Apoc4	30231 (+554), 30230 (+1773)
Apoe	30236 (-1978)
Apoh	6625 (-9786)
Apol10a	12301 (-1551), 12302 (+5366)
Apol11a	12305 (+3545)
Apol11b	12311 (-5197), 12310 (-4299), 12309 (+3556)
Apol6	12278 (+647), 12279 (+4944)
Apol7a	12295 (-2703), 12294 (-1835), 12293 (-1197), 12292 (+2489), 12291 (+8875)
Apol7b	12300 (+1596), 12299 (+9537)
Apol7c	12306 (+9948)
Apol7e	12314 (+1633), 12315 (+9686)
Apol9a	12317 (-1056), 12318 (-556), 12319 (-76), 12320 (+1832), 12321 (+5261)
Apol9b	12297 (-1163), 12296 (-63)
Apold1	29785 (-6151), 29786 (+9733)
App	14101 (+1253)
Appl2	3576 (-4922), 3575 (+152), 3574 (+476)
Aprt	34061 (-9632), 34060 (-8764), 34059 (+1726), 34058 (+2127), 34057 (+2641), 34056 (+3985)
Aptx	23398 (-206), 23397 (+114), 23396 (+1031), 23395 (+2553)
Aqp1	28663 (-8132), 28664 (-326), 28665 (+1224), 28666 (+1843), 28667 (+3011), 28668 (+3357), 28669 (+7751)
Aqp11	31220 (-2901), 31219 (-133), 31218 (+344), 31217 (+2951)
Aqp3	23430 (-57), 23429 (+1854), 23428 (+3156), 23427 (+3703)
Aqp4	16250 (-8001)
Aqp7	23424 (+3957)
Aqp8	31816 (-9576), 31817 (-5177), 31818 (-364), 31819 (+88), 31820 (+3917)
Arap1	31392 (+452)
Arap2	26296 (+2951), 26295 (+5265)
Arc	12168 (-606)
Arcn1	34764 (-2)
Areg	26658 (-4466)
Arf1	5112 (-96), 5111 (+1914), 5110 (+5698)
Arf2	6521 (-5193), 6522 (-2440)
Arf4	10534 (-185)
Arf5	28186 (+960)
Arf6	7718 (-4721), 7719 (-4360)
Arfgap1	21249 (-4077)
Arfgap2	19835 (-599)
Arfgap3	12583 (+1113), 12582 (+5131), 12581 (+5681)
Arfgef1	42 (-555), 41 (+5677)
Arfgef2	20987 (+1412)
Arfip1	21960 (-4064), 21959 (-257), 21958 (+688)
Arfrp1	21270 (+36)
Arg1	2632 (+290)
Arg2	7905 (-347), 7906 (-71), 7907 (+5383)
Arhgap1	19849 (+707), 19850 (+7062)
Arhgap10	33193 (-6500)
Arhgap11a	20030 (+6968), 20029 (+7348), 20028 (+8926)
Arhgap12	16116 (-615), 16115 (-241)
Arhgap17	31808 (+1973), 31807 (+3219), 31806 (+3643)
Arhgap18	2663 (+1102), 2664 (+4176), 2665 (+7623)
Arhgap22	10650 (-4329), 10651 (-2250)
Arhgap23	6221 (-7102)
Arhgap27	6503 (+3596), 6502 (+4472), 6501 (+5021)
Arhgap31	13864 (-819), 13863 (+7283)
Arhgap39	12277 (+3126)
Arhgap42	34386 (-9677), 34385 (-9326), 34384 (-4975), 34383 (-289), 34382 (-12)
Arhgap8	12606 (-2328)
Arhgdia	7068 (-94)
Arhgef11	22014 (-315), 22015 (+3099)
Arhgef16	25535 (-3816), 25534 (-1611), 25533 (+177), 25532 (+5637), 25531 (+7866)
Arhgef18	32355 (-2434), 32356 (-194)
Arhgef26	21769 (+165), 21770 (+1558), 21771 (+5826)
Arhgef28	9904 (+1029)
Arhgef3	10548 (-8839)
Arhgef37	16864 (-8665)
Arhgef38	22881 (+4297)
Arhgef39	23466 (-3572), 23465 (-328), 23464 (+38)
Arhgef5	28419 (+911)
Arhgef7	32461 (+1004), 32462 (+7782)
Arid1a	24880 (-3942), 24879 (-3211), 24878 (-953)
Arid3a	3385 (-57), 3386 (+9978)
Arl1	3631 (+308), 3632 (+3421), 3633 (+8886)
Arl10	9386 (+7474)
Arl13b	14023 (-110)
Arl2	17467 (-2733), 17466 (-2467)
Arl4a	7523 (-729)
Arl4d	6443 (-4138), 6444 (-1939), 6445 (+53), 6446 (+2511), 6447 (+3651), 6448 (+7967), 6449 (+9965)
Arl5a	19405 (+3585), 19404 (+4457)
Arl5b	18780 (-365)
Arl5c	6249 (+1462)
Arl6ip1	31660 (-5744), 31659 (+477)
Arl6ip5	29200 (+57)
Arl8a	1451 (+3375)
Arl8b	29319 (-33)
Arl9	26572 (-5075)
Armc1	21367 (-6267), 21366 (-5564)
Armc12	14897 (-8762), 14898 (-8193)
Armc5	31949 (-1667)
Armc8	35801 (-78)
Arnt	22218 (-7641)
Arnt2	31112 (-5509), 31111 (+549)
Arntl	31564 (-375), 31565 (+7440)
Arpc1a	27862 (+189)
Arpc1b	27864 (-8013), 27865 (-2181), 27866 (+156), 27867 (+2334)
Arpc2	584 (+623), 585 (+2911), 586 (+9447)
Arpc3	27305 (+509)
Arpc4	29349 (+2588)
Arpc5l	19334 (+280)
Arpp19	35511 (-2770)
Arrb1	31315 (-8231), 31316 (-7893), 31317 (-4841), 31318 (-2751), 31319 (-69), 31320 (+1809)
Arrdc1	18882 (+555)
Arrdc4	30858 (-2384), 30857 (-785), 30856 (+3355)
Arsa	12745 (-3403), 12744 (+1097), 12743 (+4097)
Arsg	6662 (-117), 6663 (+1678)
Arsi	16813 (+1128)
Arsk	9698 (+421)
Arv1	34156 (+480)
As3mt	18356 (-22)
Asah1	32778 (+106)
Asah2	17961 (-4514), 17960 (-62), 17959 (+3975)
Asap2	7318 (+5784)
Asap3	24997 (-9914), 24998 (-7513)
Asb1	940 (-98), 941 (+298)
Asb13	8625 (-1938), 8626 (+1240)
Asb14	10541 (-7071)
Asb7	30829 (+110)
Ascc1	3020 (-1038)
Ascc2	4385 (-2529)
Ascc3	2916 (-78), 2917 (+254)
Ascl4	3605 (+7934)
Ash2l	32640 (-118)
Asic3	25771 (+96)
Asic4	661 (-3221)
Aspa	5507 (-1928), 5506 (-106), 5505 (+2134)
Aspdh	30601 (+1)
Asprv1	29006 (-5226), 29007 (-2849), 29008 (+8731)
Aspscr1	7074 (-172), 7075 (+462), 7076 (+849), 7077 (+1267), 7078 (+7217)
Asxl1	20655 (-2991), 20656 (+145)
Atad2b	7193 (-4033), 7194 (-2299), 7195 (+300)
Atad3a	25611 (+209), 25610 (+8828)
Atad5	5789 (-3960)
Atat1	15271 (+218)
Atcay	3506 (+8987)
Ate1	31978 (-396)
Atf1	12928 (+6147)
Atf2	19664 (+1)
Atf3	2206 (+597), 2205 (+822), 2204 (+3353), 2203 (+6235)
Atf4	12439 (-9407), 12440 (-6648), 12441 (-4677), 12442 (-4296), 12443 (-2354), 12444 (-1246), 12445 (-599)
Atf5	30618 (-3904)
Atf7	13028 (-328), 13027 (+54), 13026 (+553)
Atf7ip	29813 (+6243)
Atg10	9741 (+173)
Atg12	16658 (+566)
Atg14	10793 (-8535)
Atg16l2	31386 (+3280)
Atg2a	17475 (-1462), 17476 (-181), 17477 (+97)
Atg4c	24076 (+160), 24077 (+549), 24078 (+828)
Atg4d	34468 (-3315), 34469 (-33), 34470 (+612)
Atg5	2886 (+28)
Atg9b	25768 (+8409)
Athl1	32157 (-6487)
Atl2	15823 (-8742), 15822 (+81)
Atl3	17546 (-1199), 17547 (-310)
Atmin	33849 (-125)
Atn1	29578 (+4983)
Atox1	5030 (-4104), 5029 (+5984)
Atp10b	4772 (-7326), 4773 (+3258), 4774 (+5915), 4775 (+9367)
Atp11b	21537 (-8917), 21538 (-7122), 21539 (+5490)
Atp13a1	33034 (-175), 33035 (+1530)
Atp13a3	13580 (-9305), 13579 (-8907), 13578 (-2410), 13577 (-1705), 13576 (-593), 13575 (+590)
Atp1a1	22364 (+2625)
Atp1b1	1798 (-7357), 1797 (-2723), 1796 (-357), 1795 (+7759), 1794 (+8560)
Atp2a3	5491 (-9319), 5492 (-8270), 5493 (-7876), 5494 (-1844)
Atp4a	30491 (-5549)
Atp5a1	17172 (+681)
Atp5b	4247 (-313), 4248 (+8553), 4249 (+9712)
Atp5c1	18719 (+762), 18718 (+5832)
Atp5d	3408 (+1125)
Atp5g1	6179 (+125)
Atp5g2	13029 (-312)
Atp5g3	19666 (+39), 19665 (+700)
Atp5j	14094 (+183)
Atp5j2	27872 (+2518), 27871 (+5608)
Atp5k	27003 (+85)
Atp5l	34771 (-6808), 34770 (+9666)
Atp5o	14226 (+101), 14225 (+3316)
Atp5s	7748 (+46), 7749 (+4467)
Atp6v0a1	6392 (-61), 6393 (+7917)
Atp6v0a2	27376 (-3238), 27377 (+350), 27378 (+1184), 27379 (+1655), 27380 (+3194), 27381 (+8670)
Atp6v0a4	28310 (+1700)
Atp6v0d1	33603 (-323)
Atp6v0d2	23293 (-3236)
Atp6v0e2	28495 (+467), 28496 (+4618)
Atp6v1a	13891 (+43)
Atp6v1b1	28934 (+446)
Atp6v1c1	11918 (+81), 11919 (+8007)
Atp6v1e1	29506 (+103)
Atp7a	36705 (+1792)
Atp7b	32559 (+183), 32558 (+3114)
Atp8a1	26463 (-7810), 26462 (+898), 26461 (+2929)
Atp8b1	16940 (+3569), 16939 (+4233), 16938 (+4826)
Atpif1	24801 (-251), 24800 (+804), 24799 (+4212)
Atr	35718 (-2625)
Atraid	25932 (-171)
Atrip	36008 (+5583)
Atrnl1	18571 (+5409), 18572 (+7273)
Atxn1	9248 (+6439), 9247 (+8601), 9246 (+9885)
Atxn2l	31853 (-8761), 31852 (-8194)
Atxn7	10297 (+102), 10298 (+457)
Atxn7l1	7466 (+9452)
Atxn7l2	22526 (-1572), 22525 (+782)
Atxn7l3	6467 (-1005)
Atxn7l3b	3940 (-8988)
Aunip	24933 (-449), 24934 (-66), 24935 (+2012)
Aurka	21128 (+8)
Aurkaip1	25621 (-383)
Axdnd1	1672 (-2714)
Axin1	14801 (-4681)
Aym1	27066 (+5550)
Azi2	36144 (+404)
Azin1	11911 (-255), 11910 (+1011)
B230120H23Rik	19620 (+7081)
B230217C12Rik	6244 (-3907), 6245 (+9892)
B230307C23Rik	14392 (-364)
B2m	20189 (-9362), 20190 (-6703), 20191 (-1883), 20192 (-127), 20193 (+996)
B3galnt2	8759 (-218), 8760 (+3365)
B3galt4	15136 (+2139), 15135 (+3150)
B3galt6	25631 (+226)
B3gnt2	4644 (-56), 4643 (+954)
B3gnt3	33125 (-285), 33124 (+1888)
B3gnt4	27338 (-3563)
B3gnt6	31250 (-2277), 31249 (+3806)
B3gnt7	784 (+3761), 785 (+9282)
B3gntl1	7139 (-7686)
B430306N03Rik	15463 (-3810)
B4galnt1	4170 (-8450), 4171 (-6638), 4172 (-4973), 4173 (-1177), 4174 (+729), 4175 (+1458), 4176 (+5974)
B4galnt2	6170 (-9507), 6169 (-8729), 6168 (-8369), 6167 (-65), 6166 (+2625), 6165 (+2899), 6164 (+5174)
B4galnt3	29496 (-241)
B4galnt4	32159 (-5065), 32160 (-973), 32161 (+3247)
B4galt1	23413 (-9537), 23412 (-5523), 23411 (-2407), 23410 (+6548)
B4galt3	1943 (-8836)
B4galt4	13865 (-547)
B4galt5	21015 (-7002), 21014 (-5085), 21013 (-2316), 21012 (+3438), 21011 (+4142)
B4galt6	16296 (-3457), 16295 (-2854), 16294 (+2746), 16293 (+4766), 16292 (+6159), 16291 (+8598)
B4galt7	9427 (-62)
B930041F14Rik	25606 (-6204), 25607 (+1360)
B9d1	5191 (-171)
BB014433	32529 (+9718)
BC004004	14951 (+1944), 14952 (+5239)
BC005537	8862 (-936)
BC016579	13904 (-4268), 13903 (+126), 13902 (+9577)
BC017158	31955 (-55), 31954 (+1500), 31953 (+9159), 31952 (+9994)
BC018242	34495 (+57)
BC021614	17331 (-3949), 17330 (+2032), 17329 (+2683), 17328 (+3242), 17327 (+3837), 17326 (+7082)
BC021891	34180 (-411), 34181 (+1024), 34182 (+6551), 34183 (+8508)
BC024139	12220 (-9481), 12219 (-6949), 12218 (+1874), 12217 (+7299)
BC024978	30340 (-476)
BC025446	12178 (-621), 12179 (+118)
BC026590	23694 (+129)
BC029214	18924 (-2187), 18923 (+608)
BC030336	31742 (+325)
BC030499	5681 (-1493), 5682 (+3892)
BC030867	6466 (-7440)
BC031181	17138 (+22)
BC048609	17457 (-2949)
BC049352	34785 (-7566), 34786 (-6673)
BC051628	21258 (+5177), 21259 (+6221)
BC055111	24191 (-1776), 24190 (+9090)
BC061194	18806 (-9365)
BC089597	4221 (-74)
BC096441	5380 (-3016), 5379 (-1552), 5378 (+3041)
Baat	23596 (+58)
Bach1	14121 (-8046), 14122 (+5643), 14123 (+8773)
Bad	17515 (+5180), 17516 (+7783)
Bag4	32632 (+2263)
Bahcc1	7039 (-9136), 7040 (-8605), 7041 (-4190), 7042 (-1414)
Bahd1	20074 (-9059), 20075 (+1243), 20076 (+9306)
Baiap2	7026 (-3581)
Baiap2l1	27855 (-5523), 27854 (-2630), 27853 (-1925), 27852 (-659), 27851 (+920), 27850 (+5300)
Baiap2l2	12396 (-839), 12395 (+1949), 12394 (+2851)
Bak1	14842 (+1349), 14841 (+3644)
Banp	34038 (+8025)
Bap1	10614 (+298)
Barx2	34575 (-8857), 34574 (-6540), 34573 (-858), 34572 (+80)
Batf	8140 (+9209)
Batf2	17468 (-2157), 17469 (-197), 17470 (+387), 17471 (+7080), 17472 (+7570)
Baz1b	27523 (-1449), 27524 (-247)
Bbc3	30144 (-282), 30145 (+3412)
Bbox1	19986 (-107)
Bbs2	33462 (+412)
Bbs4	35086 (-2982)
Bcar1	33745 (-8246), 33744 (+870), 33743 (+2160), 33742 (+4415)
Bcar3	22683 (-7974), 22684 (-142), 22685 (+2206), 22686 (+4094), 22687 (+6144), 22688 (+8945)
Bcas2	22386 (+406)
Bcat2	30652 (-2931), 30653 (-1593), 30654 (-1328), 30655 (+5061)
Bche	21873 (-9328)
Bckdha	30327 (+2572)
Bckdk	31929 (-3764), 31930 (-159)
Bcl10	23053 (-1903), 23054 (+1371)
Bcl11a	4664 (+2806), 4665 (+3877)
Bcl11b	8407 (-2932)
Bcl2l1	20648 (+2917), 20647 (+6648)
Bcl2l14	29738 (-480), 29739 (-92)
Bcl2l15	22392 (+1525)
Bcl3	30256 (-9623), 30255 (-8141), 30254 (-2036), 30253 (-1565), 30252 (-824), 30251 (+67), 30250 (+650), 30249 (+3504)
Bcl6	13467 (-5412), 13466 (+6034)
Bcl7b	27522 (+385)
Bcl9l	34747 (-8366)
Bcmo1	33853 (-5949), 33854 (+26)
Bco2	34856 (-165), 34855 (+789), 34854 (+1764)
Bcr	3188 (-5931), 3189 (-449), 3190 (+2548), 3191 (+7827)
Bdh1	13618 (-2561)
Bdh2	22896 (+7047)
Bdnf	19971 (+1323)
Becn1	6416 (-1339), 6415 (-1076)
Bend3	2860 (+8585)
Bend5	24302 (-6978), 24303 (+4665), 24304 (+6111)
Bend7	18646 (-42), 18647 (+3355), 18648 (+5188), 18649 (+6667)
Best3	3991 (+9977)
Bet1	28043 (+685)
Bfsp1	20473 (-8286), 20472 (+9953)
Bfsp2	35859 (+4741)
Bglap	22035 (-3799)
Bhmt	9783 (-1953)
Bid	29510 (-884)
Bin3	11245 (-3618)
Birc3	34368 (+113), 34367 (+1381)
Birc5	6931 (+1318), 6932 (+3881)
Birc6	15778 (+168), 15779 (+1148)
Birc7	21248 (-3621)
Bivm	302 (+959), 303 (+5527)
Blcap	20780 (-1513)
Blmh	5622 (+77)
Blnk	18195 (-579), 18194 (+1374)
Bloc1s1	4295 (+137)
Bloc1s2a	18302 (-90)
Bloc1s4	26100 (+6397)
Bloc1s6	20222 (-1560), 20223 (+63)
Blvra	20261 (+9768)
Blvrb	30355 (-19), 30356 (+927)
Bmf	20053 (+133), 20052 (+828), 20051 (+3234), 20050 (+5161)
Bmp1	11271 (+4382)
Bmp2k	26797 (-386), 26798 (+584), 26799 (+5581)
Bmp6	9098 (+8317)
Bmp7	21134 (+122)
Bmp8a	24571 (+479), 24570 (+1242)
Bmp8b	24562 (-344), 24563 (+1037)
Bmpr1a	10669 (-2802)
Bms1	29466 (-3638), 29465 (-57)
Bmyc	18937 (+4)
Bnip1	14832 (+769)
Bnip3	32100 (+1409)
Bod1	4703 (-16)
Bok	995 (+6589), 996 (+7594)
Bola3	28922 (+5689)
Bora	11399 (+1474)
Bpgm	28255 (-4324), 28256 (+3513), 28257 (+6962)
Bpnt1	2155 (+46), 2156 (+4651)
Bptf	6594 (-623)
Brap	27261 (+6720)
Brat1	27753 (+120), 27754 (+2840)
Brca2	27990 (-22), 27991 (+208)
Brd2	15144 (-5301), 15143 (+2550)
Brd3	19005 (-693), 19004 (+5650)
Brd4	15081 (-233), 15080 (+1951)
Brd9	9625 (+9878)
Bre	25950 (+71)
Bri3	27841 (-379), 27842 (+1316), 27843 (+4334)
Bri3bp	27405 (-2448), 27406 (+901)
Bricd5	14743 (-1122)
Brip1	5896 (+133)
Brk1	29367 (-294), 29368 (+9426)
Brms1	17384 (-203)
Brms1l	7677 (+1827)
Brpf1	29345 (+6828)
Brpf3	14917 (+7942), 14918 (+8425)
Brwd1	14330 (-1395), 14329 (-1110), 14328 (-467)
Bsdc1	24715 (+116)
Bsg	3365 (-6106)
Bspry	23824 (+579), 23825 (+1450)
Bst1	26163 (-8023), 26164 (+105), 26165 (+4043)
Bst2	33117 (-430)
Btbd19	24403 (+1533)
Btbd2	3454 (-8212), 3453 (-7759), 3452 (+108)
Btbd6	8560 (+298)
Btbd8	26994 (-102)
Btbd9	15010 (+7627)
Btd	10624 (+950), 10625 (+3889)
Btg1	3784 (-65), 3785 (+7674)
Btg2	1419 (-8772), 1418 (-8210), 1417 (-156), 1416 (+7496)
Btnl1	15159 (-7122), 15160 (-6402), 15161 (+38), 15162 (+704)
Btnl10	5094 (+8893)
Btnl2	15158 (-33)
Btnl4	15167 (-1894), 15166 (-1479), 15165 (+624), 15164 (+1382)
Btnl6	15174 (-1875), 15173 (-1349), 15172 (-405), 15171 (+711)
Btrc	18325 (+103)
Bud13	34827 (-141)
Bud31	27868 (-5045), 27869 (+7492)
C030006K11Rik	12276 (-505)
C030046E11Rik	17927 (+5135)
C130050O18Rik	27707 (+3340)
C130074G19Rik	2138 (+201), 2137 (+1080), 2136 (+5600)
C1galt1	28076 (+3461)
C1ql4	12870 (+1560), 12869 (+3475)
C1qtnf1	6967 (+4682)
C1qtnf3	11680 (+2315), 11681 (+7338)
C1qtnf6	12361 (-4692), 12360 (-3863)
C1rl	29549 (-9626), 29550 (-4759), 29551 (-200)
C1s	29553 (-7085)
C2	15194 (-82)
C2cd2	14390 (-6536), 14389 (+9627)
C2cd2l	34735 (+349), 34734 (+1732)
C2cd4d	22165 (+1331), 22166 (+5009)
C2cd5	29942 (+7358)
C3	15594 (-6356), 15593 (-5094), 15592 (-2231)
C330006D17Rik	34362 (-224), 34361 (+132)
C330011M18Rik	33284 (-2108)
C330018D20Rik	16766 (-2795), 16765 (-1674)
C330021F23Rik	32361 (-1532)
C4b	15186 (-8)
C630004L07Rik	25170 (-1156), 25169 (+64)
C630050I24Rik	33663 (-2332), 33664 (-1942), 33665 (+133)
C77080	24709 (-2821), 24708 (-218), 24707 (+284), 24706 (+618), 24705 (+1287), 24704 (+3860)
C87414	26762 (-5129), 26761 (+7450)
C87436	28986 (-4493)
C8g	18927 (+213)
C920021L13Rik	22246 (+47)
Cab39	758 (-3176), 759 (-2657), 760 (+2), 761 (+1043), 762 (+9304)
Cabin1	3248 (-999), 3247 (+223), 3246 (+512)
Cables1	16198 (+3148)
Cables2	21228 (-6927), 21227 (-3660), 21226 (+400)
Cabp1	27145 (+8970)
Cabp4	17339 (+3293), 17338 (+3553)
Cabyr	16234 (-89)
Cacfd1	18988 (-188)
Cachd1	24093 (-7747)
Cacna1a	33298 (-1086)
Cacna1c	29469 (-4424), 29468 (+7143)
Cacna1s	1506 (-8900)
Cacnb1	6251 (+2853), 6250 (+9846)
Cacul1	18597 (-346)
Calcrl	19760 (-4565)
Calm1	8230 (-9220), 8231 (-8629), 8232 (-736)
Calm2	16017 (+4146)
Calm3	30170 (-104), 30169 (+1422), 30168 (+2198)
Calml4	35213 (-387)
Calr	33311 (-1376)
Calu	28198 (-237)
Camk1	29347 (+7198)
Camk1g	2298 (-4632)
Camk2d	22765 (-680), 22766 (+273)
Camk2n1	25083 (-375), 25084 (+1276), 25085 (+5670), 25086 (+9177)
Camkmt	15947 (+49)
Camsap3	32362 (+222), 32363 (+821), 32364 (+6126)
Camta2	5437 (-122), 5436 (+1000)
Cand1	4065 (+1), 4064 (+9669)
Cand2	29420 (-3405)
Cant1	6966 (+539), 6965 (+2570), 6964 (+4721), 6963 (+6609)
Canx	4848 (-329)
Cap1	24546 (-4299)
Capg	28868 (-5439), 28869 (+6123)
Capn1	17448 (-6538), 17447 (-4759), 17446 (+387)
Capn10	962 (-2705)
Capn11	15376 (-6957)
Capn13	15750 (-2109)
Capn5	31248 (+173)
Capn8	2105 (-201), 2106 (+9864)
Capns1	30478 (-9502), 30477 (+43)
Caprin1	19945 (+276)
Capza1	22439 (-61)
Capza2	28117 (-2843), 28118 (+3308), 28119 (+4113)
Capzb	25127 (-8069), 25128 (-7692), 25129 (+1990), 25130 (+4270)
Car12	35375 (-7752)
Car13	21351 (-2)
Car2	21355 (-75), 21356 (+1510)
Car4	5880 (-5186), 5881 (+1563), 5882 (+2023), 5883 (+5988)
Car6	25442 (-9457), 25441 (-4451)
Car7	33550 (+308)
Car9	23467 (-3222), 23468 (-28), 23469 (+2736), 23470 (+3973)
Card10	12368 (-526), 12367 (-298)
Card11	27759 (+6863)
Card14	7008 (+6945)
Card9	18951 (+279)
Carhsp1	13132 (-6046), 13131 (-4872), 13130 (-132)
Carkd	32451 (-132)
Carm1	34476 (-465)
Casc4	20184 (+2133)
Casc5	20081 (-304), 20082 (+8530)
Caskin2	6798 (-485)
Casp12	34357 (+6776)
Casp6	22830 (+1015), 22831 (+1339)
Casp7	18516 (+740), 18517 (+2900), 18518 (+3213)
Casp8	413 (-7146), 414 (+7339)
Casp9	25222 (+2182)
Cast	9655 (+159), 9654 (+948)
Casz1	25352 (-1237), 25353 (-89), 25354 (+3119)
Cat	19937 (-8879), 19936 (-7574), 19935 (-455), 19934 (+7456)
Catsper4	24901 (-3187), 24900 (-369)
Cav1	28102 (+1271)
Cbfa2t2	20679 (-3523), 20680 (+404)
Cbl	34728 (-1874), 34727 (-244)
Cblc	30248 (-8219), 30247 (-597), 30246 (+1377), 30245 (+3284), 30244 (+3664)
Cbln3	10945 (+1627), 10944 (+1975)
Cbr1	14260 (+1136)
Cbr4	32973 (+279)
Cbx2	6990 (+467)
Cbx3	28567 (-201)
Cbx4	7000 (-6092), 6999 (-5670), 6998 (-5317), 6997 (-1072)
Cbx7	12421 (-178), 12420 (+706)
Cbx8	6994 (-9725), 6993 (-6000), 6992 (-4414), 6991 (+6633)
Cby3	4849 (-2106)
Cc2d1a	33287 (+354)
Ccbl1	19102 (+4619), 19101 (+5546), 19100 (+7385)
Ccbl2	22995 (+85)
Ccdc101	31855 (-4738), 31856 (-2927)
Ccdc107	23463 (-2337)
Ccdc108	637 (-6414), 636 (-5720), 635 (-899), 634 (-66), 633 (+7466)
Ccdc111	32867 (+5335)
Ccdc114	30684 (-824)
Ccdc117	4408 (-259)
Ccdc12	36031 (+446), 36032 (+1341), 36033 (+3063), 36034 (+4763)
Ccdc120	36374 (+1010), 36373 (+3137)
Ccdc126	28522 (-269)
Ccdc134	12531 (-7135)
Ccdc138	2962 (+329)
Ccdc142	28902 (+5), 28903 (+665), 28904 (+1864)
Ccdc148	19440 (+216), 19439 (+595), 19438 (+2363)
Ccdc159	34494 (+68)
Ccdc162	2781 (-857)
Ccdc163	24384 (+5302)
Ccdc17	24369 (+980)
Ccdc170	2340 (-5718)
Ccdc176	8097 (+53)
Ccdc19	1994 (-5437)
Ccdc24	24442 (-76), 24441 (+6126)
Ccdc25	11136 (+441), 11137 (+4631)
Ccdc28a	2477 (+153)
Ccdc32	20080 (+431)
Ccdc37	29084 (+3027)
Ccdc41	3723 (-246)
Ccdc43	6479 (+23)
Ccdc50	13522 (-6474), 13523 (-862), 13524 (+124)
Ccdc51	36009 (-884), 36010 (+94)
Ccdc53	3620 (+241)
Ccdc57	7089 (-41)
Ccdc59	3866 (+141)
Ccdc6	3165 (+9227)
Ccdc62	27342 (+172)
Ccdc63	27287 (+1166), 27286 (+5743)
Ccdc65	12847 (+63), 12848 (+6284)
Ccdc66	10553 (+9133)
Ccdc68	17048 (-40)
Ccdc71	35966 (-35)
Ccdc71l	7441 (+900)
Ccdc74a	13316 (+9900)
Ccdc8	30171 (+9946)
Ccdc85c	8433 (+4722), 8432 (+5491), 8431 (+9733)
Ccdc88b	17506 (+5553)
Ccdc88c	8279 (+1899), 8278 (+9174)
Ccdc90b	31180 (-35), 31181 (+5635)
Ccdc93	1153 (-2071)
Ccdc96	26076 (+346)
Ccdc97	30329 (-5154), 30328 (+65)
Cchcr1	15248 (-124)
Cck	36241 (-5541)
Ccl20	735 (+611)
Ccl22	33490 (+9015)
Ccl24	27531 (-7784)
Ccl25	32372 (-137), 32373 (+1250)
Ccl25	32371 (+8983)
Ccl26	27530 (-892), 27529 (-163)
Ccl6	5839 (-3205)
Ccnd3	15446 (+2243), 15447 (+3232)
Ccne2	23240 (-7326), 23241 (-6973), 23242 (-5845), 23243 (-4547), 23244 (-179)
Ccng2	26749 (-1482)
Ccni	26746 (+9500)
Ccnjl	4783 (+321), 4784 (+562)
Ccnl1	21832 (-200), 21831 (+846)
Ccnl2	25620 (+5243)
Ccnyl1	523 (-468), 524 (+786)
Ccp110	31702 (-1289)
Ccr10	6410 (+1558)
Ccr4	36093 (-6609), 36092 (+8847)
Ccr9	36345 (+1433)
Ccrl1	35865 (+6784)
Ccrn4l	21641 (-2383), 21642 (+9330)
Ccs	17380 (+94), 17379 (+2985)
Ccser1	28745 (+8838)
Ccser2	10696 (-2678), 10695 (-113), 10694 (+3828)
Cct6a	27424 (-360), 27425 (+111), 27426 (+405)
Cct6b	5822 (+139)
Cct7	28962 (+411)
Cct8	14112 (-223)
Cct8l1	25817 (-6195), 25818 (-4096), 25819 (+3829)
Cd101	22340 (+6366)
Cd160	22274 (+5448), 22273 (+8903)
Cd164	2778 (-898), 2779 (-134)
Cd209a	32368 (-5477)
Cd24a	2866 (-3999)
Cd27	29617 (-2006)
Cd274	17923 (+1331)
Cd276	35065 (-1043)
Cd2ap	15321 (-8615)
Cd300lf	6747 (+1612)
Cd302	19483 (-142), 19482 (+440)
Cd38	26166 (-9959), 26167 (-8582), 26168 (-7854), 26169 (-4990), 26170 (-2378), 26171 (-34)
Cd46	2325 (-4658)
Cd47	13930 (-296)
Cd52	24898 (+5887)
Cd63	4291 (-3882), 4292 (+85), 4293 (+666)
Cd74	16809 (-1)
Cd81	32249 (+4756), 32250 (+5146), 32251 (+7055), 32252 (+7457)
Cd82	19891 (+9), 19890 (+3637), 19889 (+7256), 19888 (+7932)
Cd83	9176 (+119), 9177 (+1350), 9178 (+1989)
Cd96	13912 (+2409)
Cda	25077 (-9249), 25076 (-8946), 25075 (-356), 25074 (+1214), 25073 (+4421), 25072 (+7789), 25071 (+9580)
Cdadc1	11024 (+7033)
Cdan1	20171 (-81)
Cdc123	18695 (-4749), 18694 (-3495)
Cdc14a	22585 (+9364)
Cdc16	32509 (-870), 32510 (-59)
Cdc20	24470 (-8643)
Cdc25a	36012 (+1293), 36013 (+2890), 36014 (+3903)
Cdc25b	20336 (+9771)
Cdc27	6532 (+94)
Cdc34	3363 (-634)
Cdc34-ps	6109 (-8864)
Cdc37l1	17890 (-145), 17891 (+434)
Cdc42	25037 (+554)
Cdc42bpb	8509 (-1238), 8508 (-281), 8507 (+303), 8506 (+899), 8505 (+5621)
Cdc42ep2	17441 (-5707), 17440 (-5285), 17439 (-2933)
Cdc42ep4	6731 (+1534), 6730 (+2320), 6729 (+3416)
Cdc42ep5	30060 (-5672), 30059 (-2308), 30058 (-1447), 30057 (-606), 30056 (-169)
Cdc42se1	22207 (+1711), 22208 (+4284)
Cdc42se2	4989 (-8530), 4988 (-1081)
Cdc5l	15370 (-45)
Cdc6	6302 (-2972), 6303 (-2366), 6304 (-337)
Cdc7	26989 (+283)
Cdca3	29587 (-36)
Cdca4	8557 (+9894)
Cdca5	17458 (+4393)
Cdca7	19624 (-1639), 19625 (-69)
Cdca8	24597 (+313)
Cdcp1	36321 (-209), 36320 (+330), 36319 (+1930), 36318 (+7958), 36317 (+8892), 36316 (+9427)
Cdh1	33646 (-6128), 33647 (-3290), 33648 (-72), 33649 (+1336), 33650 (+3433), 33651 (+3752), 33652 (+6289), 33653 (+8382)
Cdh17	23261 (+5056), 23262 (+6877)
Cdh24	10884 (+296)
Cdhr2	9393 (-5524), 9394 (-23), 9395 (+278), 9396 (+516), 9397 (+2603), 9398 (+3624)
Cdhr3	7460 (+523)
Cdhr5	32175 (-59)
Cdip1	13088 (-8533), 13087 (+1617)
Cdipt	31868 (+6277)
Cdk10	34091 (-13)
Cdk11b	25597 (+302)
Cdk12	6253 (+3220)
Cdk16	36459 (-780)
Cdk18	1322 (+228), 1321 (+620), 1320 (+8036), 1319 (+8562)
Cdk19	2749 (-7900), 2750 (-7325)
Cdk20	9551 (+5473)
Cdk2ap2	17332 (+60)
Cdk4	4159 (+2676)
Cdk5	25772 (-181)
Cdk5rap1	20676 (-8927), 20675 (+8), 20674 (+439)
Cdk5rap2	23864 (-115)
Cdk5rap3	6192 (-3891), 6191 (-3111), 6190 (-1058)
Cdk6	25660 (+370)
Cdk9	19213 (-2705), 19212 (-762), 19211 (-292), 19210 (+8595)
Cdkal1	8886 (+297)
Cdkl1	7752 (-96)
Cdkl2	26676 (+80)
Cdkl4	15853 (+3853)
Cdkn1a	14943 (-9840), 14944 (-6517), 14945 (+2882), 14946 (+3648), 14947 (+5809), 14948 (+6806)
Cdkn1b	29782 (+8206)
Cdkn1c	32264 (+4475)
Cdkn2aip	32891 (+7004)
Cdkn2c	24298 (+230)
Cdo1	16657 (+6232)
Cdr2	31753 (+2234), 31752 (+7354), 31751 (+9707)
Cdrt4	5269 (+6769)
Cds1	26907 (+799), 26908 (+2142), 26909 (+3534), 26910 (+5900)
Cds2	20378 (-194)
Cdsn	15251 (-7360), 15252 (+4683)
Cdx1	16819 (-4002), 16818 (+730)
Cdx2	27938 (-3352), 27937 (-1347), 27936 (-194), 27935 (+7675)
Ceacam1	30317 (+4690)
Ceacam16	30265 (-6890), 30264 (-6574), 30263 (-5230), 30262 (-4563), 30261 (-3763)
Ceacam18	30594 (-6935), 30595 (+44), 30596 (+1282)
Ceacam2	30322 (+3019), 30321 (+8859)
Ceacam20	30271 (-2920), 30272 (-8), 30273 (+1318), 30274 (+6357)
Cebpa	30538 (-2564), 30539 (-150)
Cebpb	21037 (-1014), 21038 (+93), 21039 (+341), 21040 (+3179), 21041 (+4884)
Cebpg	30533 (-4028), 30532 (+3138)
Cela1	12950 (+8715)
Cela2a	25223 (-8383)
Celf1	19826 (+381), 19827 (+9858)
Celf3	22171 (+4130)
Cenpa	25903 (-420)
Cenpc1	26584 (-1179), 26583 (-889)
Cenpi	36726 (-4921)
Cenpl	1729 (+1840), 1730 (+2257), 1731 (+5446)
Cenpp	9308 (+8580)
Cenpv	5242 (+665), 5241 (+5289)
Cep120	16691 (-113)
Cep135	26559 (+384)
Cep152	20240 (+666)
Cep170b	8556 (-325)
Cep55	18093 (-378)
Cep70	35794 (-5047), 35795 (-170)
Cep95	6578 (+67)
Cept1	22461 (-551)
Cerk	12692 (-8715), 12691 (-3222), 12690 (-742), 12689 (+8683)
Cers2	22215 (-3929), 22216 (+3562)
Cers4	32378 (-3551)
Cers6	19540 (-917), 19541 (+9822)
Ces1a	33427 (+9750)
Ces1d	33430 (-363), 33429 (+7863)
Ces1e	33432 (-39), 33431 (+586)
Ces1f	33437 (+1528), 33436 (+3207)
Ces1g	33439 (+4355)
Ces1h	33442 (+7896)
Ces2a	33561 (-2081), 33562 (-80), 33563 (+7487)
Ces2b	33571 (-3166)
Ces2c	33572 (-5080), 33573 (+1)
Ces2d-ps	33574 (-132), 33575 (+1610)
Ces2e	33578 (-1), 33579 (+1172)
Ces2g	33580 (+103)
Ces2h	33584 (-4379), 33585 (+7697)
Ces3a	33586 (-2448), 33587 (+2602)
Ces3b	33588 (-2637), 33589 (+70)
Cfb	15193 (-1664), 15192 (+248), 15191 (+1735)
Cfl1	17396 (-915), 17397 (+1093), 17398 (+2929), 17399 (+3932)
Cfl2	7653 (+3262)
Cflar	408 (-637)
Cga	23348 (-3978), 23349 (-2585)
Cgn	22192 (-1171), 22191 (+2275), 22190 (+2671), 22189 (+3143), 22188 (+4968), 22187 (+5751), 22186 (+8838)
Cgref1	25921 (-4633), 25920 (-3419), 25919 (-670), 25918 (+138), 25917 (+841), 25916 (+2295)
Chac1	20120 (+8671), 20121 (+9991)
Chac2	4701 (+110)
Chat	10643 (-7351)
Chchd2	27428 (+322)
Chchd3	28248 (+228), 28247 (+735), 28246 (+5911)
Chchd4	29107 (+251), 29106 (+7513)
Chchd7	23172 (+371), 23173 (+1174)
Chd1	14659 (-382), 14660 (+897)
Chd1l	22298 (-991), 22297 (-551)
Chd2	30886 (+3724), 30885 (+5681), 30884 (+6784), 30883 (+7196), 30882 (+9378)
Chd3	5356 (-8530), 5355 (+3871), 5354 (+4665), 5353 (+5405), 5352 (+6033)
Chd4	29608 (-8644), 29609 (-7004)
Chd7	23211 (+9731)
Chd8	10844 (-6964)
Chd9	33398 (-3190), 33399 (-44), 33400 (+4342)
Chdh	10574 (+1165), 10575 (+3198), 10576 (+9286)
Cherp	33143 (+5760)
Chga	8300 (-8249)
Chic2	26544 (+1048)
Chid1	32210 (-5067), 32209 (-4648), 32208 (+4097)
Chit1	1420 (-9390), 1421 (-5006)
Chka	17304 (-7318), 17305 (-1830), 17306 (-1482), 17307 (-1132)
Chkb	12742 (-9572), 12741 (-1540)
Chm	36721 (+140)
Chmp1a	34090 (+823)
Chmp2b	14028 (-2389), 14027 (-180), 14026 (+5158)
Chmp3	28839 (-6672), 28840 (-6206)
Chmp4b	20688 (-8656)
Chmp4c	21341 (-4753), 21342 (+1155), 21343 (+5723)
Chmp6	7023 (-123), 7024 (+2519), 7025 (+2851)
Chmp7	11235 (-8381), 11234 (-284)
Chn2	28608 (-3840), 28609 (+440), 28610 (+2732), 28611 (+8057)
Chordc1	34438 (-136)
Chp1	20133 (+31), 20134 (+6775)
Chp2	31774 (+139), 31775 (+2062), 31776 (+4300), 31777 (+7109)
Chpt1	3629 (-7462), 3628 (-3844), 3627 (-1322), 3626 (-147), 3625 (+930), 3624 (+2527), 3623 (+8904)
Chrdl2	31337 (+4530), 31338 (+6310)
Chrm4	19860 (-814)
Chrna2	11152 (-3010), 11153 (-152)
Chrnb1	5385 (+699)
Chrne	5428 (-8266), 5427 (-7840)
Chst3	3026 (-9880), 3025 (+4056)
Chst4	33719 (-1738), 33718 (+1844)
Chst8	30518 (-344), 30517 (+192)
Chuk	18301 (-4260), 18300 (-3059), 18299 (+536)
Ciapin1	33504 (-1419), 33503 (-292)
Cib1	30994 (+227), 30993 (+683), 30992 (+2503)
Cic	30299 (+8200)
Cidea	17022 (+7385)
Cideb	10938 (-751), 10937 (-56), 10936 (+681)
Cidec	29356 (-3098), 29355 (+930)
Ciita	13170 (-8033), 13171 (-1478)
Cilp2	33040 (+5358)
Cirbp	3414 (-6626), 3415 (-1837), 3416 (+511)
Cisd1	3172 (-159)
Cisd2	22898 (-54)
Cisd3	6230 (-2000), 6231 (-143), 6232 (+1296)
Cish	35908 (+926), 35909 (+3049)
Cit	27154 (+5210)
Cited2	2471 (-748), 2472 (-91)
Ckb	8518 (+176)
Ckm	30206 (-4003)
Ckmt1	20176 (-973), 20177 (+1558), 20178 (+6853)
Ckmt2	9751 (-286)
Cks1b	22110 (-88)
Cks2	9324 (-9472), 9325 (-8157), 9326 (+2747)
Clasp1	1098 (-809)
Clasrp	30216 (-5538), 30215 (+4520)
Clca1	23034 (-41), 23033 (+9131)
Clca2	23037 (-6661), 23036 (-4338)
Clca4	23038 (+3399)
Clca6	23042 (+3285)
Clcc1	22538 (-19)
Clcf1	17342 (+6918)
Clcn1	28408 (-6387), 28409 (+1019)
Clcn2	13414 (-717), 13413 (-162), 13412 (+1151), 13411 (+2764)
Clcn3	32955 (+230)
Clcn4-2	30117 (-583), 30116 (+51)
Clcn5	36372 (+870)
Cldn14	14280 (-4628), 14279 (+2822), 14278 (+7603)
Cldn15	27610 (-1232), 27611 (-579), 27612 (+570), 27613 (+1189), 27614 (+4119)
Cldn2	36742 (+5288)
Cldn23	32720 (-130), 32719 (+1157), 32718 (+6366)
Cldn3	27503 (-4848), 27504 (-2782), 27505 (-12)
Cldn4	27499 (-4294)
Cldn7	5395 (-4401), 5396 (-3840), 5397 (-3406), 5398 (-176), 5399 (+1200), 5400 (+1540), 5401 (+3659), 5402 (+5790)
Clec16a	13174 (+118)
Clec2d	29702 (-4816), 29703 (+184)
Clec2e	29698 (-2146), 29697 (-964), 29696 (-156), 29695 (+2782)
Clec2h	29688 (-957), 29689 (-150)
Clec2j	29687 (+2198)
Clec3b	36313 (+8755)
Clec4f	28933 (-8838), 28932 (-7646)
Clgn	33264 (+7000), 33265 (+8035)
Clic1	15207 (-1597), 15208 (+1808)
Clic4	24951 (-758)
Clic5	15364 (+1457), 15365 (+4643)
Clic6	14246 (+3489)
Clint1	4803 (+506), 4804 (+4001), 4805 (+8469)
Clip1	27339 (+788)
Clip2	27483 (+2587), 27482 (+3513), 27481 (+3817)
Clk1	395 (+6320)
Clk3	35040 (+3414), 35039 (+6422)
Clk4	4855 (+428)
Clmn	8385 (+9338)
Cln5	11463 (+235)
Cln6	35210 (-9868), 35211 (-2547), 35212 (+4754)
Cln8	32519 (-797), 32520 (+2332)
Clock	26554 (-4719), 26553 (-1422), 26552 (-1043), 26551 (-481)
Clptm1	30225 (-4308)
Clpx	35311 (-4039), 35312 (+8386)
Clrn3	32079 (-658), 32078 (-26), 32077 (+3450), 32076 (+3765), 32075 (+6601)
Clta	23484 (+4274), 23485 (+5549)
Cltb	9389 (+5761), 9388 (+8534)
Cltc	5939 (-756), 5938 (-56), 5937 (+516), 5936 (+1062), 5935 (+4114)
Cluh	5521 (-5073), 5522 (-112)
Cma1	10947 (+4070)
Cmah	8856 (+2879)
Cmas	29932 (+679)
Cmbl	11759 (-9067), 11760 (-4664), 11761 (-3662), 11762 (+1000)
Cmip	33867 (+1602), 33868 (+3309)
Cml2	28973 (+86), 28972 (+6373)
Cml5	28966 (-2598), 28965 (-1486), 28964 (+30)
Cmpk1	24318 (+436)
Cmpk2	7363 (+4715), 7364 (+6811), 7365 (+8157), 7366 (+9414)
Cmtm2a	33544 (-1325)
Cmtm4	33547 (+5423), 33546 (+7482)
Cmtm6	36099 (+500), 36100 (+1171)
Cndp1	17232 (-230)
Cndp2	17235 (+435), 17234 (+8444), 17233 (+8915)
Cnep1r1	33378 (-1149)
Cnga1	26472 (+2472)
Cnih	10753 (-5955), 10752 (-378)
Cnih4	2083 (-2255), 2084 (+318), 2085 (+1057)
Cnksr1	24905 (-716), 24904 (-127), 24903 (+141), 24902 (+598)
Cnn3	22626 (-555)
Cnnm2	18360 (-5761)
Cnnm4	166 (+2712), 167 (+3168), 168 (+4354), 169 (+5007), 170 (+6636), 171 (+7070)
Cnot1	33535 (-8849), 33534 (-593), 33533 (+1774)
Cnot10	36094 (-7057)
Cnot11	246 (+1680)
Cnot2	3979 (-30), 3978 (+5340)
Cnot6	4834 (+3504)
Cnot6l	26782 (-393)
Cnot8	5070 (+101)
Cnr2	24974 (-6025)
Cnst	2035 (-9)
Cntd1	6414 (-9248)
Cntf	17681 (+8061)
Cntnap1	6411 (+5295)
Cntrob	5349 (+24)
Coa4	31349 (-219)
Coasy	6396 (-1930), 6397 (-1607), 6398 (-1082)
Cobl	4508 (-4001)
Cobll1	19523 (+53)
Col16a1	24731 (+8014)
Col1a1	6122 (-7302)
Col2a1	12834 (-2658), 12833 (+3057)
Col4a3bp	9860 (+45), 9861 (+795), 9862 (+1075)
Colgalt1	33122 (+1237)
Commd1	4649 (-4155), 4648 (-2981)
Commd2	21716 (-8269), 21715 (+127)
Commd3	18805 (-26)
Commd6	11452 (-4473)
Comp	33069 (-9196)
Comt	13357 (-6871), 13356 (-5977)
Comtd1	10443 (+4451)
Copa	1968 (-4359)
Copb1	31587 (+445)
Copb2	35788 (+46), 35789 (+343)
Copg1	29054 (-8653), 29055 (+106)
Cops2	20245 (-2)
Cops3	5118 (+203)
Cops4	26872 (-4216)
Cops5	39 (+304)
Cops7a	29596 (-5042)
Cops7b	805 (+4216)
Cops8	902 (-26)
Copz1	13036 (+4971), 13037 (+8428)
Coq10a	4260 (+1644), 4259 (+5639)
Coq10b	366 (+533)
Coq2	26892 (+2812)
Coq3	23301 (+208)
Coq4	19076 (-8816), 19077 (-5656)
Coq7	31681 (-6123)
Coq9	33501 (-4058), 33502 (-1317)
Coro1c	27078 (-9577), 27077 (-1960), 27076 (-691), 27075 (+518)
Coro2a	23562 (+1741), 23561 (+2739), 23560 (+4549), 23559 (+6107), 23558 (+7875)
Coro7	13083 (+273)
Cort	25372 (+3152)
Cotl1	33955 (+5718)
Cox10	5284 (+3089)
Cox14	12892 (-1196)
Cox16	7994 (-5507), 7993 (-3417), 7992 (+117)
Cox17	13855 (-1434), 13856 (-119)
Cox19	27703 (-2151), 27702 (+48), 27701 (+359)
Cox20	2028 (-511)
Cox5a	35015 (+113)
Cox6a2	31947 (-3687), 31946 (-2032), 31945 (+225)
Cox6b1	30490 (+4872)
Cox6b2	30087 (+3793)
Cox7a1	30474 (-163), 30475 (+2385), 30476 (+2936)
Cox8a	17535 (-9661)
Cox8b	32148 (-8371), 32147 (-3077)
Cp	21382 (-7528)
Cpa1	28225 (+4579)
Cpd	5613 (-7817), 5612 (-139)
Cpeb2	26150 (-770), 26151 (-59), 26152 (+558)
Cplx2	9383 (+9303)
Cplx3	35026 (+5083)
Cpm	4005 (-3582)
Cpn1	18279 (+354)
Cpne2	33479 (-5648), 33480 (-4458), 33481 (-2691), 33482 (-1481), 33483 (+546)
Cpox	14015 (-9337), 14016 (-7581), 14017 (-6201)
Cpped1	13235 (-1589), 13234 (-89), 13233 (+269), 13232 (+1111)
Cps1	570 (+5387)
Cpsf1	12260 (-9)
Cpsf2	8290 (+5771)
Cpsf7	17617 (+688), 17618 (+5617)
Cpt1a	17265 (-1381), 17266 (+2367)
Cpt2	24247 (+1380), 24246 (+2311)
Cpvl	28605 (-7907), 28604 (-3620), 28603 (-2483), 28602 (+4402)
Cramp1l	14764 (+96), 14763 (+7557)
Crat	19119 (+360), 19118 (+7383), 19117 (+8452)
Crb2	19297 (-4504)
Crb3	15589 (+230)
Crbn	29281 (+5915)
Crcp	27430 (+450)
Creb3	23472 (-394)
Creb3l2	28296 (+78), 28295 (+1581), 28294 (+3425), 28293 (+8923)
Creb3l3	3483 (-2373), 3482 (+3307), 3481 (+5995), 3480 (+7859)
Creb3l4	22123 (+2094), 22122 (+4445)
Crebbp	13065 (-1261)
Crebl2	29775 (-3757), 29776 (-1283), 29777 (+268)
Crebrf	14826 (-847), 14827 (+931), 14828 (+2526), 14829 (+3776)
Crebzf	31176 (+144)
Creg1	1840 (+3886), 1841 (+4445)
Creld1	29362 (-5926), 29363 (-4104), 29364 (-235), 29365 (+4079)
Crip1	8569 (-3525), 8570 (-906), 8571 (+85), 8572 (+715)
Crip2	8568 (+4506)
Cript	15993 (+5010)
Crkl	13308 (+9965)
Crlf2	27022 (+2155)
Crot	25703 (-9328), 25702 (+649)
Crtc1	33071 (+315)
Crtc2	22124 (+4494)
Cry2	19875 (-3827), 19874 (+1538)
Cryba4	27039 (+9415)
Cryga	546 (-9002)
Crygb	545 (-8278), 544 (-6846), 543 (-3209)
Crygf	557 (-4722)
Crygn	25777 (+890)
Cryl1	10973 (+1028), 10972 (+5969)
Cryzl1	14219 (+730)
Cs	4256 (-2897), 4257 (-1121), 4258 (-378)
Csf1r	16823 (+4997), 16824 (+9980)
Csf2	4980 (-7523), 4979 (+691), 4978 (+6800)
Csf2ra	18618 (+1281), 18617 (+2108), 18616 (+3233), 18615 (+4519)
Csf3	6276 (+8072)
Csk	35032 (-2557), 35031 (-957), 35030 (-116), 35029 (+1138), 35028 (+2374), 35027 (+6941)
Csnk1a1	16865 (+5010)
Csnk1d	7097 (-3613), 7096 (-1483), 7095 (+196), 7094 (+6305)
Csnk1g2	3450 (+3675)
Csnk1g3	16695 (-8245), 16696 (-6910)
Csnk2a1	20622 (-9693)
Cspg4	34987 (+32)
Csrnp1	36191 (-6747), 36190 (-5388)
Csrp2	3917 (+2417)
Csrp2bp	20526 (-117)
Cst6	17391 (-6664), 17390 (-4198), 17389 (+400)
Cstb	3344 (+145)
Cstf1	21129 (+184)
Ctage5	7697 (+279), 7698 (+663), 7699 (+1299)
Ctbp1	26030 (-1749), 26029 (-404)
Ctbp2	32043 (-5017)
Ctcfl	21144 (-9121), 21143 (-5028)
Ctdnep1	5403 (-819)
Ctdsp1	598 (-225), 599 (+442), 600 (+1373), 601 (+6005)
Ctdsp2	4156 (-7617), 4157 (-5638), 4158 (-1423)
Ctdspl2	20185 (+730)
Ctf1	31920 (-1386)
Ctf2	31921 (-4660)
Cth	23151 (+79)
Ctif	17157 (-269)
Ctnna1	16448 (-333), 16449 (+598), 16450 (+4693), 16451 (+6307), 16452 (+8465)
Ctnnal1	23695 (-2211)
Ctnnb1	36206 (+38), 36207 (+1692)
Ctnnbip1	25397 (-9839), 25398 (-1932)
Ctnnd1	19772 (-6710), 19771 (+34)
Ctsb	11070 (+883), 11071 (+1287), 11072 (+1805), 11073 (+4105), 11074 (+9956)
Ctsc	31128 (-776)
Ctsd	32240 (-251)
Ctsh	35672 (+644)
Ctsl	9550 (+8541)
Ctsll3	9496 (-7078)
Ctso	21915 (+38), 21916 (+9941)
Ctss	22222 (-1865), 22223 (+8852)
Ctsz	21185 (-1339), 21184 (+216)
Cttn	32317 (+314), 32316 (+690), 32315 (+2052)
Cttnbp2nl	22441 (+740)
Ctu1	30597 (-2411)
Cubn	18759 (-5546), 18758 (+7176)
Cuedc2	18343 (-3905)
Cul9	15413 (-3019)
Cuta	14836 (+158)
Cux1	27597 (+2225)
Cx3cl1	33491 (-1077), 33492 (+667), 33493 (+6867), 33494 (+9336), 33495 (+9905)
Cx3cr1	36194 (-5144), 36193 (+5418)
Cxadr	14081 (-3518), 14082 (+6621), 14083 (+7880), 14084 (+9906)
Cxcl10	26694 (-4251)
Cxcl16	5410 (-6365), 5409 (-6125)
Cxcl2	26651 (-4274), 26652 (+4910)
Cxcl5	26647 (+897), 26648 (+1225)
Cxcl9	26693 (-1218)
Cxcr1	583 (-4485), 582 (-2126)
Cyb5	17240 (-3820), 17241 (-362), 17242 (+1259), 17243 (+3663), 17244 (+4980), 17245 (+9221)
Cyb561	6542 (-7846), 6541 (-6448), 6540 (-5246), 6539 (-4380), 6538 (-3501), 6537 (-3240), 6536 (-156)
Cyb5b	33669 (-8879), 33670 (-7904), 33671 (+1084)
Cyb5r2	31449 (+8545)
Cyb5r3	12573 (-4019), 12572 (-1543), 12571 (-110), 12570 (+7382), 12569 (+9450)
Cyb5r4	35657 (-163)
Cyba	34052 (+483)
Cyc1	12241 (-3409), 12242 (+512)
Cycs	28559 (-251), 28558 (+5247), 28557 (+5490)
Cyfip1	30754 (+6515)
Cyhr1	12268 (+2658)
Cyld	33387 (+308)
Cym	22469 (-8303), 22468 (+3034), 22467 (+3982), 22466 (+4595)
Cyp17a1	18355 (-7031), 18354 (-214)
Cyp1a1	35033 (-5589), 35034 (-1041), 35035 (-552)
Cyp24a1	21123 (-281)
Cyp26b1	28948 (-2497)
Cyp27a1	627 (-447), 628 (+8227)
Cyp2b10	30334 (-2285), 30335 (-175)
Cyp2c29	18153 (-117)
Cyp2c44	18289 (-9212), 18288 (-7069), 18287 (+4211), 18286 (+5668), 18285 (+6102), 18284 (+7587), 18283 (+8871)
Cyp2c55	18138 (-8137), 18139 (-1663), 18140 (-145)
Cyp2c65	18142 (-2916), 18143 (-114)
Cyp2c66	18144 (-92)
Cyp2c68	18155 (-4539), 18154 (-116)
Cyp2c70	18157 (-130)
Cyp2d10	12543 (-62)
Cyp2d22	12542 (-373), 12541 (+703), 12540 (+1810)
Cyp2d26	12554 (-2480), 12553 (-1964), 12552 (-134), 12551 (+6362)
Cyp2d34	12545 (-2110)
Cyp2d37-ps	12547 (-6271)
Cyp2d40	12550 (+433)
Cyp2d9	12544 (-2070)
Cyp2e1	32145 (-117)
Cyp2j5	24052 (-1129)
Cyp2j6	24049 (-6979), 24048 (+326)
Cyp2r1	31589 (-242)
Cyp2s1	30331 (-8584), 30330 (-163)
Cyp2u1	22858 (-9357), 22857 (-7641), 22856 (+7976)
Cyp2w1	27704 (+2769)
Cyp3a11	27882 (-4673), 27881 (-1422), 27880 (-18)
Cyp3a13	27649 (-5188), 27648 (-239)
Cyp3a25	27888 (-1863), 27887 (-98), 27886 (+3300)
Cyp3a59	27896 (-9883), 27897 (-180)
Cyp4a10	24319 (-4119)
Cyp4b1	24321 (-267), 24320 (+4182)
Cyp4f13	15115 (+2149), 15114 (+3459), 15113 (+3864)
Cyp4f14	15111 (-8020), 15110 (-2606), 15109 (-2279), 15108 (-547), 15107 (-183), 15106 (+876), 15105 (+3671)
Cyp4f15	15100 (+3141), 15101 (+5557)
Cyp4f16	15088 (-7559), 15089 (-6155), 15090 (-1209), 15091 (-214)
Cyp4f39	15083 (+290), 15084 (+6008)
Cyp4f40	15096 (-7270), 15097 (-5381), 15098 (-727), 15099 (+2408)
Cyp4v3	32827 (-8888), 32826 (-18), 32825 (+3682), 32824 (+4503), 32823 (+5096), 32822 (+5948), 32821 (+6641)
Cyp8b1	36272 (-46)
Cyr61	23051 (+6917)
Cystm1	16477 (-5469), 16478 (-4750), 16479 (-502), 16480 (+41), 16481 (+1289)
Cyth1	6956 (-775), 6955 (-483)
Cyth2	30676 (+8822)
Cytip	19423 (-2610)
D10Wsu52e	3606 (+4480)
D130040H23Rik	33026 (+9993)
D130043K22Rik	8865 (+7044), 8866 (+7622)
D130062J21Rik	23317 (+3196), 23318 (+3926)
D17H6S53E	15215 (-1634), 15216 (-745), 15217 (+99)
D17H6S56E-5	15204 (+5431)
D17Wsu92e	14873 (-8813), 14872 (-426), 14871 (+427), 14870 (+7927)
D19Bwg1357e	17879 (-8366)
D1Ertd622e	1035 (-5067), 1034 (-270), 1033 (+1158)
D2hgdh	1003 (+36), 1004 (+7513)
D430042O09Rik	31836 (+163), 31837 (+2032), 31838 (+2527)
D4Wsu53e	24947 (-908), 24948 (+63), 24949 (+1212)
D5Ertd579e	26086 (+462)
D630004N19Rik	31352 (-7536), 31351 (+2970), 31350 (+4505)
D630023F18Rik	550 (-6790), 549 (-303), 548 (+4427), 547 (+4821)
D630036H23Rik	7490 (+287)
D630037F22Rik	2948 (-366), 2947 (-57)
D630039A03Rik	23732 (-192)
D730039F16Rik	19246 (+605)
D730045B01Rik	28032 (+287)
D830014E11Rik	26983 (+9641)
D830046C22Rik	27705 (-6190), 27706 (-4030)
D8Ertd82e	32732 (-747), 32733 (+6715)
D930028M14Rik	30295 (+1210)
D930048N14Rik	4865 (+2227)
Daam1	7760 (+5341)
Dab1	24130 (-6049)
Dab2	11644 (-6863)
Dab2ip	19266 (-4901)
Dact2	14622 (+651), 14621 (+1287)
Dact3	30167 (-1056)
Dad1	10863 (+139), 10862 (+4529)
Dag1	35962 (-8138), 35961 (-7749), 35960 (-3841)
Dagla	17613 (+9134)
Daglb	27811 (-39), 27812 (+2363)
Dak	17621 (-191), 17620 (+1299)
Dalrd3	35971 (-960), 35972 (-64)
Dao	27083 (-4084), 27084 (+146), 27085 (+1208), 27086 (+3555)
Dap	11750 (-146)
Dapk2	35341 (-4220), 35342 (-62)
Dapp1	22934 (+941), 22933 (+3058), 22932 (+7005)
Daw1	737 (-9400)
Dazap1	3420 (-479), 3421 (+5890)
Dazap2	12941 (-700)
Dbi	1142 (+661), 1141 (+4753)
Dbndd2	20907 (+63)
Dbnl	4414 (-6098)
Dbp	30660 (+3383), 30661 (+4099), 30662 (+4814)
Dcaf10	23499 (-79)
Dcaf12	23435 (-3862), 23434 (+136)
Dcaf15	33286 (+968)
Dcaf4	8038 (-7823)
Dcaf5	7966 (-915)
Dcaf7	6549 (-4928), 6550 (+8575)
Dcaf8	1972 (-6273), 1973 (-5833), 1974 (+530), 1975 (+6626)
Dcbld1	2926 (-1233), 2927 (+3179)
Dck	26619 (+280), 26620 (+3413)
Dclre1a	18527 (+250)
Dclre1b	22391 (+121), 22390 (+7573)
Dcn	3802 (+7993)
Dcp1a	10579 (-6026), 10580 (+55)
Dcpp3	14706 (+7088)
Dcst1	22101 (-984), 22100 (+5271)
Dctn1	28918 (-9517)
Dctn2	4177 (+1115)
Dctn4	16782 (-227)
Dctn5	31771 (-37)
Dcun1d1	21547 (+6934)
Dcxr	7081 (+111), 7080 (+648)
Ddah1	23052 (+4393)
Ddc	4496 (-3528), 4495 (+2206), 4494 (+9799)
Ddhd1	10734 (+45), 10733 (+1857), 10732 (+3031)
Ddhd2	32630 (-4863), 32629 (-3355), 32628 (-2800), 32627 (-1935), 32626 (+223), 32625 (+3991)
Ddi2	25217 (-8578), 25216 (-5991), 25215 (-2535), 25214 (+1287)
Ddit3	4179 (-20)
Ddit4	3016 (+96), 3015 (+2299), 3014 (+2735)
Ddn	12852 (+3870), 12851 (+4834)
Ddost	25062 (-17)
Ddr1	15258 (-8187), 15257 (-7538), 15256 (-4466), 15255 (+1043)
Ddt	3249 (-185)
Ddx1	7266 (+6544)
Ddx19b	33726 (+3966)
Ddx23	12845 (+253), 12844 (+734)
Ddx24	8347 (-153)
Ddx27	20993 (-8662), 20994 (-7351)
Ddx39b	15219 (+431)
Ddx5	6577 (+20)
Ddx54	27231 (+987)
Ddx58	23390 (+617)
Ddx6	34751 (-5845), 34752 (-764)
Ddx60	32991 (-4181), 32992 (-3438)
Deaf1	32179 (+9996)
Deb1	36267 (+410)
Decr1	23282 (+170), 23281 (+2348)
Decr2	14798 (-3)
Dedd	1947 (-132)
Dedd2	30297 (+2151)
Def8	34105 (+261)
Defb36	20634 (-12)
Degs1	2100 (-8313)
Degs2	8446 (-101), 8445 (+2366), 8444 (+2872), 8443 (+3412), 8442 (+4001), 8441 (+7408), 8440 (+7799)
Dek	9274 (+61)
Dennd1a	19304 (+47)
Dennd1b	1556 (-2413), 1557 (-1985), 1558 (+7029)
Dennd2d	22456 (-897), 22457 (+1969)
Dennd3	12150 (-1034), 12151 (+471)
Dennd4c	23958 (-27)
Dennd5b	30026 (+990), 30025 (+5233)
Dennd6a	10531 (-693), 10532 (-3), 10533 (+690)
Dennd6b	12728 (-9965), 12727 (-5666), 12726 (-91)
Depdc7	19956 (-1342), 19955 (-262), 19954 (+2151)
Dera	29866 (-9655), 29867 (-2794), 29868 (-2472), 29869 (+174)
Derl1	11993 (+1720), 11992 (+2756)
Derl3	3257 (-9949)
Desi1	12529 (+9738)
Desi2	2025 (+1087), 2026 (+3096)
Det1	30919 (+184)
Dffa	25371 (+298)
Dffb	25523 (+15)
Dfna5	28534 (+96), 28533 (+2040), 28532 (+8907)
Dgat1	12247 (+61), 12246 (+1292), 12245 (+5971)
Dgat2	31295 (-1696), 31294 (-642), 31293 (+176)
Dgat2l6	36656 (-8702)
Dgcr6	13334 (+2777), 13335 (+8535), 13336 (+9790)
Dgka	4289 (-530), 4288 (+78), 4287 (+1369), 4286 (+2160), 4285 (+2694)
Dgkd	841 (+5341)
Dgkq	27018 (+399), 27017 (+1274), 27016 (+2738), 27015 (+6150)
Dgkz	19864 (-8582)
Dguok	28930 (+8272)
Dhcr24	24182 (-9982), 24183 (-3576), 24184 (-1386), 24185 (-364), 24186 (+2156)
Dhcr7	32286 (-98), 32287 (+7125)
Dhps	33329 (-2677)
Dhrs1	10935 (+182), 10934 (+1680), 10933 (+8338)
Dhrs11	5871 (+1214), 5870 (+3306)
Dhrs3	25278 (-1852), 25279 (-1134), 25280 (-298), 25281 (+1744), 25282 (+3834), 25283 (+4707), 25284 (+9098)
Dhrs4	10918 (-9384), 10919 (-8908), 10920 (-1190), 10921 (+237)
Dhrs7	7774 (+812)
Dhrs7b	5161 (-5255), 5162 (+7335), 5163 (+7991)
Dhrs9	19560 (+173), 19561 (+3257), 19562 (+3564), 19563 (+5953)
Dhx33	5449 (-152)
Dhx34	30141 (+8594)
Dhx35	20803 (+118), 20804 (+484)
Dhx40	5943 (-6821), 5942 (+9181)
Dhx9	1617 (+731)
Diap1	16519 (+1077), 16518 (+2682), 16517 (+6251), 16516 (+6610)
Dicer1	8378 (+5041)
Dido1	21245 (-109), 21244 (+505), 21243 (+1557)
Dio1	24234 (+3022), 24233 (+3380), 24232 (+4185), 24231 (+7069), 24230 (+8819)
Dirc2	13788 (-152)
Dis3l2	807 (+9430)
Disp2	20066 (-1222), 20067 (+2884)
Dkk4	32585 (-315)
Dlat	34867 (-875), 34866 (-15)
Dld	7405 (+401)
Dlec1	36169 (+1700)
Dlg1	13625 (-1852), 13626 (+144)
Dlg5	10459 (+1526)
Dll1	14647 (+3241)
Dll4	20116 (-7042), 20117 (-6780), 20118 (-6162), 20119 (-550)
Dlst	8110 (+2487)
Dlx1	19596 (+4059), 19597 (+4460)
Dlx2	19598 (+3540)
Dlx4	6135 (-9482)
Dmtf1	25720 (+233)
Dmxl1	16681 (+297)
Dna2	3096 (+277)
Dnaaf1	33937 (+3616), 33938 (+5139)
Dnaaf2	7713 (-4050)
Dnaaf3	30066 (+3266)
Dnahc10	27382 (-6363)
Dnahc17	6949 (-3814)
Dnahc2	5369 (+2347), 5368 (+9125)
Dnahc8	15015 (-3618)
Dnaja2	33338 (0)
Dnaja4	34927 (-9183)
Dnajb1	33276 (-4473), 33277 (+153)
Dnajb12	3008 (-67), 3009 (+1454)
Dnajb3	868 (-1366)
Dnajb4	23119 (-7574), 23118 (-3619)
Dnajb6	25883 (+4811)
Dnajc11	25491 (+51)
Dnajc13	35867 (-4456)
Dnajc17	20094 (-299)
Dnajc18	16464 (+9401)
Dnajc19	21529 (-3), 21528 (+8381)
Dnajc22	12871 (+32), 12872 (+419)
Dnajc24	19968 (+279)
Dnajc25	23774 (-5767), 23775 (-2347)
Dnajc28	14213 (-6)
Dnajc3	11510 (-1512), 11511 (+187)
Dnajc30	27510 (+35)
Dnajc5	21272 (+8822)
Dnajc5b	21375 (+3599)
Dnajc7	6378 (+1646)
Dnalc4	12415 (+406), 12414 (+758), 12413 (+8889)
Dnase1	13056 (-9574), 13057 (-7341), 13058 (-4384), 13059 (-3048), 13060 (+15), 13061 (+899), 13062 (+7315)
Dnhd1	31441 (+156)
Dnm1	19184 (-7541), 19183 (-2740), 19182 (-1259), 19181 (-724), 19180 (+33)
Dnm2	34473 (-220), 34474 (+1005)
Dnm3	1756 (-151)
Dnmbp	18276 (-6596), 18275 (-4408), 18274 (-3244), 18273 (-2835), 18272 (+4114)
Dnmt3a	7165 (-619), 7166 (+1631)
Dnpep	655 (+354), 654 (+687), 653 (+4107)
Dnttip1	20917 (+1852)
Dnttip2	22668 (+8273)
Doc2g	17321 (-644)
Dock1	32059 (+7146), 32060 (+9080)
Dock4	7535 (+353)
Dock5	11194 (-7621), 11193 (-7421), 11192 (-6515), 11191 (+457), 11190 (+850), 11189 (+8462)
Dock6	34492 (-7383), 34491 (-3072), 34490 (-2527), 34489 (-1828), 34488 (-261), 34487 (-37)
Dock8	17858 (+1156), 17859 (+5976)
Dok2	11279 (-1173)
Dok4	33506 (+4559), 33505 (+4945)
Dolk	19107 (+5884)
Dolpp1	19115 (+821), 19116 (+2382)
Dom3z	15187 (+562), 15188 (+4082)
Donson	14216 (-7568), 14215 (+3062)
Dot1l	3457 (-242), 3458 (+1081), 3459 (+3745), 3460 (+5864)
Dpagt1	34736 (-328)
Dpep1	34086 (+4334), 34087 (+5984), 34088 (+7729), 34089 (+8638)
Dpf2	17438 (-347), 17437 (+3445)
Dph1	5540 (-119)
Dph2	24443 (+49)
Dph3	10635 (-908), 10634 (-382), 10633 (+11)
Dpm2	19208 (-3981)
Dpm3	22080 (-4358)
Dpp3	17381 (+224)
Dpp4	19512 (-8119), 19511 (-5283), 19510 (+383), 19509 (+8430)
Dpp7	18916 (+110)
Dpp8	35302 (+511)
Dpp9	15554 (+49)
Dppa3	29537 (-1154)
Dpt	1816 (-8673)
Dpy19l4	23248 (-84)
Dpyd	22604 (+389), 22605 (+5050)
Dpysl5	25904 (+1745)
Dqx1	28899 (+395), 28900 (+942)
Dr1	27001 (-1723)
Dram2	22460 (-491)
Drc1	25895 (-8135), 25896 (-4208), 25897 (-1824), 25898 (+3740), 25899 (+4134), 25900 (+4752), 25901 (+5088)
Drd4	32177 (+9286)
Drg2	5156 (-59)
Drosha	11705 (+5903)
Dsc2	16260 (-351), 16259 (+1458), 16258 (+6919)
Dscam	14343 (+5056)
Dscr3	14287 (-949)
Dsg2	16276 (-3565), 16277 (+74)
Dsg3	16272 (-1438)
Dsn1	20745 (-244), 20744 (+4560)
Dstn	20479 (-2916), 20480 (-1136), 20481 (+4)
Dtd2	7583 (-7771), 7582 (-1097), 7581 (+4279)
Dtnb	7163 (-146)
Dtnbp1	9219 (+342)
Dtx2	27571 (+603)
Dtx3l	13801 (-390), 13800 (+233)
Dtx4	17678 (-193)
Duox1	20209 (+9128)
Duoxa2	20208 (+4169)
Dus1l	7086 (-72)
Dusp12	1924 (-7982), 1923 (+320), 1922 (+2390)
Dusp14	5856 (+8394)
Dusp16	29773 (+4306)
Dusp23	1998 (+80)
Dusp27	1852 (+2876)
Dusp4	32694 (-1891), 32695 (+8062)
Dusp5	18422 (+122), 18423 (+641), 18424 (+4544), 18425 (+7133)
Dusp6	3835 (-9624), 3836 (-5539), 3837 (+7490), 3838 (+8088)
Dusp8	32231 (+8593)
Dvl1	25623 (+574), 25624 (+1175)
Dym	17139 (-2324)
[truncated: 5,422 more rows]

## Sheet: Sup. Table S7 CV HNF4A Genes
Supplemental Table S7: Genes associated with CV HNF4A sites (Related to Fig. 4 and Fig. 5)
Genes associated with an HNF4A site in CV							# GREAT version 3.0.0		Species assembly: mm9	Association rule: Single nearest gene: 10000 bp max extension, curated regulatory domains included
Gene Name	Peak Locations relative to TSS
0610007P14Rik	1896 (-22)
0610009L18Rik	1655 (+1410)
0610011F06Rik	3386 (+1017)
0610039K10Rik	4818 (-7604)
0610040J01Rik	6049 (+4358)
1110059G10Rik	8394 (+14)
1190007I07Rik	802 (-261), 801 (+21)
1500035N22Rik	5930 (-6248)
1600012H06Rik	3348 (+3478)
1600014C10Rik	7015 (-67)
1700001C19Rik	3562 (-8351), 3561 (-2032)
1700006E09Rik	1487 (-871)
1700016C15Rik	433 (-1633)
1700018A14Rik	3828 (+774)
1700034H15Rik	484 (-3376)
1700084C01Rik	402 (-6536), 403 (-1548)
1810019J16Rik	5702 (-5968)
1810043H04Rik	1646 (+301), 1647 (+575)
1810046K07Rik	8085 (+4144)
1810055G02Rik	3984 (+768)
2010001E11Rik	588 (+2234)
2010003K11Rik	4001 (-93), 4000 (+1191), 3999 (+1872)
2200002D01Rik	6990 (-5691), 6989 (-2896), 6988 (0)
2210404O09Rik	3358 (-1578)
2210407C18Rik	1174 (-2438), 1173 (+4543)
2310005G13Rik	3192 (-8403)
2310007B03Rik	204 (-53)
2310016G11Rik	7024 (+6974)
2310030G06Rik	8080 (-138)
2310033P09Rik	1176 (+2868)
2310057M21Rik	7341 (-1660)
2310079G19Rik	3222 (-4027)
2410017I17Rik	3515 (-8869), 3516 (-6094)
2410124H12Rik	3246 (+8511)
2510049J12Rik	6743 (+688)
2610034B18Rik	7097 (-317)
2610528J11Rik	5612 (-253)
2700062C07Rik	3757 (-3804)
2810408A11Rik	1246 (+59)
2810417H13Rik	8180 (+7042)
2810459M11Rik	162 (-5539)
2900026A02Rik	6224 (-8784), 6223 (+9665), 6222 (+9961)
3110001I22Rik	3036 (+966)
3110057O12Rik	4982 (-1801), 4983 (+205)
3230401D17Rik	4814 (-4265), 4813 (+389)
4632415L05Rik	4933 (+3)
4732471J01Rik	6952 (-5356)
4833420G17Rik	2349 (-134)
4833439L19Rik	2170 (-928), 2169 (+991)
4930447A16Rik	2708 (+7387)
4930529M08Rik	4733 (-60)
4930539E08Rik	3423 (-9843)
4930597O21Rik	6608 (-7411)
4931406C07Rik	7984 (-120)
4932443I19Rik	7461 (-7402)
4933422H20Rik	1567 (+7122), 1568 (+7754), 1569 (+9879)
4933440N22Rik	6754 (-9299), 6753 (-9000)
5031434C07Rik	6723 (-4798)
5031439G07Rik	2885 (-648)
5330426P16Rik	3182 (+231)
5430421N21Rik	2975 (-5915)
5730409E04Rik	5652 (+2056)
5730559C18Rik	336 (+5737)
6030445D17Rik	5748 (-9308), 5749 (+3)
6330416G13Rik	5467 (+3167)
9030617O03Rik	1928 (-3247)
9130008F23Rik	3533 (+6685)
9130011E15Rik	4202 (+350)
9130017N09Rik	752 (+1486), 753 (+2221)
9130019O22Rik	7326 (+17)
9130230L23Rik	6080 (-62)
9230112D13Rik	2454 (+9996)
9430015G10Rik	5899 (-6482)
9430016H08Rik	79 (+204)
9930021J03Rik	4129 (-574)
A230046K03Rik	813 (-4)
A430005L14Rik	5868 (+570)
A930018M24Rik	2486 (+1481)
AA386476	7543 (+36)
AI314180	5448 (-846)
AI597468	817 (+6991)
AU023871	3490 (+3489)
AU040320	5653 (+9175)
AW822073	642 (+1115), 641 (+2422)
Aak1	6658 (+2108)
Aars2	3547 (-150), 3548 (-14)
Abat	3001 (-159)
Abca13	1019 (-2230)
Abca6	1540 (+6870)
Abcb10	7841 (+9425)
Abcb4	5913 (+73)
Abcb7	8451 (+256)
Abcb9	6287 (+3868)
Abcc6	7046 (-52)
Abcd3	5199 (-3043), 5198 (+11)
Abcf2	5926 (-206)
Abhd11	6316 (-7944), 6317 (-6869), 6318 (+3864)
Abhd12	4739 (+2431), 4738 (+4255)
Abhd14a	8297 (+35)
Abhd17c	7136 (-1139), 7135 (+1017), 7134 (+6104)
Abhd2	7090 (-595)
Abl1	4399 (-1218)
Abr	1291 (+3079)
Abracl	530 (+139)
Acaa1a	8368 (+1678)
Acaa1b	8366 (-8629)
Acad9	4974 (+49)
Acadl	119 (+394)
Acadm	5315 (-183), 5314 (+53)
Acat1	8088 (+2908)
Acat3	3321 (-155)
Acbd4	1496 (+3886)
Ace	1510 (-74)
Acer1	3598 (+1037)
Aco1	5366 (-2943)
Aco2	2856 (-115)
Acot1	1878 (-3829)
Acot11	5551 (-506), 5550 (+8702)
Acot12	2251 (-103)
Acot4	1879 (+27)
Acot9	8461 (+5678)
Acp2	4549 (+189)
Acp5	7993 (-82)
Acp6	5124 (-7497), 5125 (-2168)
Acpl2	8261 (-340)
Acsl5	4237 (-5624), 4238 (-5219), 4239 (-1443)
Acsm5	7277 (+1040)
Acta1	7840 (-321)
Actb	6391 (-5790), 6390 (-3129)
Actg1	1654 (+4689), 1653 (+8133)
Actn4	6986 (-7690), 6985 (+3398)
Actrt3	4962 (+7179)
Acvr1b	2973 (-6708)
Acvr2a	4446 (+159)
Acy1	8296 (-891), 8295 (+27)
Acy3	3991 (-267)
Adad2	7796 (+635)
Adam15	5075 (-5728)
Adam1b	6261 (-7254)
Adam2	2564 (-5098)
Adamtsl5	775 (-3662), 774 (+3668)
Adap1	6370 (-7145), 6369 (+7986)
Adap2	1337 (+5120)
Adck5	2800 (-1210)
Adcy6	2937 (-9523)
Adh7	5272 (+4887)
Adipor2	6763 (-3772), 6762 (-3623), 6761 (+7338), 6760 (+7763), 6759 (+9459)
Adk	2393 (+185)
Aen	7088 (-695)
Afap1l1	3898 (+4304)
Agpat2	4356 (-6865), 4355 (+3340), 4354 (+8576)
Agpat3	741 (-5464)
Agpat4	3312 (-1009)
Agpat9	6186 (+816), 6187 (+7963)
Agphd1	8099 (+2827)
Agrn	5904 (-6796), 5903 (-3380), 5902 (-1625)
Agtpbp1	2195 (-4575)
Agxt	203 (+3427)
Agxt2l2	1109 (-176)
Ahcy	4767 (-115)
Ahdc1	5690 (-3314)
Ahnak	4052 (-414)
Aim1	625 (+1009)
Aim1l	5711 (-7101), 5712 (-2841), 5713 (-961), 5714 (+589), 5715 (+908)
Ak2	5657 (-9314), 5658 (-3287), 5659 (+7713)
Ak3	4123 (+1789)
Akap11	2613 (-130), 2612 (+183)
Akap2	5438 (-9014)
Akap9	5907 (-132)
Akr1a1	5591 (+228)
Akr1b7	6481 (-184), 6482 (+1193)
Akr1cl	115 (-4975)
Akr7a5	5774 (+549), 5775 (+743)
Akt2	6965 (+1856)
Aktip	7661 (+9947)
Alas1	8294 (-2194)
Aldh16a1	7030 (-6)
Aldh1b1	5396 (-9212), 5397 (+1174)
Aldh1l1	6673 (-6120), 6674 (-4271)
Aldh3a2	1193 (+471)
Aldh3b1	3990 (+17)
Aldh4a1	5777 (+6344), 5778 (+7406)
Aldh9a1	396 (-9656), 397 (+4640)
Aldoart2	1795 (-4806)
Alg14	5196 (-101)
Aloxe3	1231 (-1236)
Alpi	168 (-41)
Als2cl	8335 (+9983)
Als2cr12	86 (+4105)
Alyref2	417 (+504)
Amn	1986 (-3145), 1987 (-4)
Ang	2492 (-1306)
Angel2	467 (-8142)
Angptl4	3463 (+5929)
Ankhd1	3785 (+1637)
Ankrd28	2443 (+476)
Ankrd29	3729 (+6231)
Ankrd9	1983 (-4183), 1982 (-2807), 1981 (-1032), 1980 (-455)
Anks4b	7281 (-91)
Ankzf1	144 (+9218)
Ano10	8392 (+5725)
Ano9	7380 (-3397)
Anp32a	8156 (+3866)
Anxa11	2415 (+3649)
Anxa2	8194 (+1881), 8195 (+3253)
Anxa4	6656 (+169), 6655 (+4612)
Ap1ar	5235 (-286), 5234 (+3335)
Ap1m1	7612 (+539)
Ap2a2	7394 (+1156)
Ap3s2	7096 (-4509)
Ap4m1	6356 (-675)
Ap5s1	4688 (+17)
Apba3	795 (+91)
Apbb2	6090 (+426)
Apbb3	3788 (-16)
Aplp1	6995 (-256)
Apoa1	8065 (-4297), 8066 (-1230)
Apoa4	8070 (+249), 8071 (+1281)
Apob	1696 (-50), 1697 (+1023)
Apobec1	6780 (+8574), 6779 (+8982)
Apobec2	3571 (-3476)
Apoc2	6933 (-1241), 6932 (+41)
Apoc3	8069 (-2285), 8068 (-519), 8067 (-53)
Apoe	6934 (-1911)
Apol10a	2811 (+5188), 2812 (+5587)
Apol7a	2810 (+2530), 2809 (+8919)
Aprt	7825 (-8884), 7824 (-8617), 7823 (+2191)
Aptx	5371 (+83), 5370 (+2443)
Aqp1	6589 (-291), 6590 (+1792)
Aqp11	7154 (+191)
Aqp3	5377 (+1828), 5376 (+3232)
Aqp8	7304 (+27), 7305 (+3947)
Arap1	7197 (+510)
Arap2	6047 (+2933)
Arc	2769 (-596)
Arcn1	8052 (-26)
Arf1	1177 (+5785)
Arf2	1503 (-5167)
Arfgap1	4908 (-4092)
Arfgap3	2873 (+1240)
Arg1	564 (+382)
Arhgap12	3715 (-563)
Arhgap17	7301 (+2041)
Arhgap18	573 (+1233), 574 (+4138)
Arhgap27	1500 (+3576), 1499 (+5209)
Arhgap42	7976 (-4990)
Arhgef11	5054 (+3241)
Arhgef16	5874 (-1631), 5873 (-74), 5872 (+424), 5871 (+5683)
Arhgef18	7427 (-115)
Arhgef37	3894 (-8803)
Arid1a	5704 (-999)
Arl4d	1486 (+3700)
Arl5a	4454 (+3634)
Arl8a	309 (+3365)
Arntl	7239 (-299), 7240 (+7557)
Arpc1b	6407 (-2219)
Arsg	1537 (-104)
Asah1	7520 (+93)
Asap3	5743 (-9957), 5744 (-7484)
Asb1	198 (-179)
Asb14	2421 (-7046)
Asprv1	6653 (+8496)
Aspscr1	1662 (+7246)
Atad5	1335 (-3969)
Atcay	792 (+9073)
Atf4	2841 (-9529), 2842 (-9288), 2843 (-4783)
Atg14	2481 (-8496)
Atg4c	5523 (+557)
Atg9b	5923 (+8369)
Atl3	4050 (-342)
Atp11b	4972 (-8937)
Atp13a1	7584 (-51)
Atp1a1	5144 (+2628)
Atp1b1	383 (+8619)
Atp2a3	1273 (-9387), 1274 (-8184)
Atp5b	942 (-257), 943 (+8579)
Atp5l	8054 (+9674)
Atp5o	3243 (+3203)
Atp6v0a1	1469 (+7906)
Atp6v0a2	6289 (+1220)
Atp6v0e2	6549 (+4474)
Atp6v1e1	6773 (+50)
Atp7b	7476 (+250)
Atp8b1	3907 (+3563)
Atpif1	5683 (-267)
Atxn2l	7310 (-8195)
Atxn7l1	1748 (+9511)
Aunip	5725 (+1973)
B2m	4643 (-6709), 4644 (-1876), 4645 (+933)
B3gnt2	1058 (-146)
B3gnt3	7608 (-217), 7607 (+1933)
B3gnt6	7163 (+3860)
B4galnt1	924 (-6594)
B4galnt2	1419 (-91)
B4galnt4	7376 (-5056), 7377 (-961), 7378 (+3142)
B4galt3	413 (-8821)
B4galt5	4846 (+4266)
B4galt6	3745 (-3380), 3744 (+6204)
B930041F14Rik	5892 (-6021)
BB014433	7468 (+9441), 7467 (+9675)
BC005764	756 (-1444)
BC016579	3171 (-4313), 3170 (+51), 3169 (+292)
BC017158	7335 (-100), 7334 (+9161)
BC021614	3995 (+2715)
BC021891	7848 (-474)
BC024139	2789 (-9487)
BC025446	2774 (-527), 2775 (-222), 2776 (+450)
BC030499	1310 (+3884)
BC048609	4023 (-3011)
BC049352	8056 (-6681)
BC055111	5543 (-1858), 5542 (+9143)
BC089597	936 (-25)
BC096441	1241 (-1563), 1240 (+3051)
Bad	4043 (+7789)
Bahcc1	1652 (-4210)
Baiap2l1	6405 (-2575), 6404 (-1967)
Baiap2l2	2830 (-825), 2829 (+2665)
Batf	1895 (+9268)
Batf2	4026 (-274), 4027 (+6972)
Bbc3	6918 (+3329)
Bbox1	4598 (-53)
Bcar1	7746 (-8186)
Bcar3	5209 (-7956), 5210 (+2202), 5211 (+4075), 5212 (+8999)
Bcat2	7035 (+4990)
Bche	5028 (-9387)
Bcl2l15	5148 (+1512)
Bcl3	6942 (-8337), 6941 (-8066), 6940 (-1949)
Bcl6	3085 (-5455)
Bcl9l	8050 (-8322)
Bco2	8076 (-199), 8075 (+724)
Bcr	696 (-5924)
Bdh1	3117 (-2584)
Bend3	620 (+8641)
Bend7	4282 (-1), 4283 (+3330), 4284 (+5329)
Bfsp1	4717 (+9962)
Bfsp2	8290 (+4779)
Bid	6774 (-913)
Bin3	2586 (-3586)
Blmh	1295 (+135)
Bloc1s1	956 (+77)
Bmf	4619 (+870), 4618 (+5201)
Bmp1	2594 (+4317)
Bmp2k	6165 (-346)
Bmpr1a	2453 (-2840)
Bnip1	3400 (+768)
Bok	206 (+7242), 207 (+7972)
Bola3	6637 (+5550), 6638 (+5831)
Bpgm	6483 (+3495), 6484 (+6960)
Bpnt1	457 (+53)
Bri3	6402 (-496)
Bri3bp	6296 (+867)
Brms1	4006 (-327)
Brwd1	3263 (-1135)
Bsdc1	5667 (+68)
Bst1	6010 (-2), 6011 (+3954), 6012 (+4220)
Btbd2	778 (+143)
Btg2	305 (-8270), 304 (-294), 303 (-20)
Btnl1	3469 (-6508), 3470 (+142)
Btnl2	3468 (-166)
Btnl4	3472 (-1410), 3471 (+672)
Btnl6	3478 (-1333), 3477 (+678)
Bud31	6408 (-5068)
C030006K11Rik	2806 (-423)
C130074G19Rik	454 (+174), 453 (+5611)
C1qtnf1	1626 (+4689)
C1qtnf3	2671 (+7184)
C1qtnf6	2821 (-3893)
C1rl	6786 (-9642), 6787 (-223)
C2	3484 (-87)
C2cd2	3276 (+9562)
C2cd2l	8048 (+1708)
C2cd4d	5091 (+4608)
C3	3600 (-5058)
C330018D20Rik	3867 (-2847)
C630004L07Rik	5782 (-1304)
C77080	5666 (-225)
C920021L13Rik	5109 (+68)
Cab39	159 (+1173), 160 (+9329)
Cabin1	713 (+507)
Cables2	4901 (-6886)
Cacna1c	6756 (+7166)
Calcrl	4536 (-4571)
Calm3	6924 (+2095)
Calml4	8158 (-673), 8159 (-43)
Camk2d	5228 (-729)
Camsap3	7430 (+689)
Cand2	6745 (-3393)
Cant1	1625 (+2641)
Cap1	5633 (-4328)
Capn5	7162 (+137)
Caprin1	4593 (+363)
Car9	5385 (-3211)
Card14	1636 (+6931)
Carhsp1	3006 (-124)
Casz1	5825 (-1201)
Cat	4592 (-8853), 4591 (-683)
Cbfa2t2	4763 (+471)
Cblc	6939 (+1364), 6938 (+3669)
Cbln3	2522 (+2000)
Cbr4	7568 (+306)
Cbx8	1633 (-5920), 1632 (-4304)
Ccbl1	4389 (+4739), 4388 (+5532), 4387 (+7401)
Ccbl2	5280 (+10)
Ccdc12	8331 (+4798)
Ccdc148	4462 (+2313)
Ccdc25	2562 (+4612)
Ccdc28a	531 (+255)
Ccdc32	4623 (+398)
Ccdc50	3099 (-968)
Ccdc63	6272 (+818), 6271 (+1240)
Ccdc65	2941 (+6137)
Ccdc68	3937 (-2)
Ccdc71	8321 (-39)
Ccdc85c	1964 (+4686)
Ccdc93	237 (-2106)
Ccl22	7682 (+9060)
Ccl25	7433 (+1294)
Ccl25	7432 (+8984)
Ccl26	6322 (-269)
Ccl6	1344 (-3209)
Ccne2	5333 (-5867)
Ccnl2	5895 (+5221)
Ccnyl1	109 (-474)
Ccr9	8406 (+1369)
Ccrn4l	4992 (+9076), 4993 (+9364)
Ccs	4004 (+3074)
Ccser2	2463 (-2626), 2462 (-18)
Cct6b	1341 (+140)
Cct8l1	5935 (+3860)
Cd160	5118 (+5403)
Cd163l1	7370 (+3013)
Cd209a	7431 (-5464)
Cd302	4470 (-222)
Cd38	6013 (-7895)
Cd44	4590 (+333)
Cd47	3178 (-249)
Cd63	954 (+63)
Cd81	7405 (+5073)
Cd82	4573 (+3649), 4572 (+7504), 4571 (+7907)
Cd83	2126 (+1527)
Cda	5763 (-329), 5762 (+1334)
Cdc123	4299 (-4716)
Cdc14a	5186 (+9408)
Cdc27	1507 (+190)
Cdc34-ps	1409 (-8833)
Cdc37l1	4122 (-163)
Cdc42ep4	1554 (+1478), 1553 (+2372)
Cdc42ep5	6894 (-5591), 6893 (-694)
Cdc42se1	5102 (+1704)
Cdc42se2	1143 (-8500)
Cdc6	1447 (-2404)
Cdca7	4500 (-1531)
Cdcp1	8401 (-156), 8400 (+8020)
Cdh17	5340 (+4990), 5341 (+6920)
Cdhr2	2174 (-6528), 2175 (-5333), 2176 (+8), 2177 (+3689)
Cdhr3	1747 (+593)
Cdhr5	7383 (+15)
Cdipt	7314 (+5951), 7315 (+6478)
Cdk18	278 (+470), 277 (+8565)
Cdk5	5924 (-102)
Cdk5rap1	4761 (+401)
Cdr2	7286 (+2229), 7285 (+9743)
Cdrt4	1213 (+6790)
Cds1	6191 (+3568)
Cdsn	3502 (+4835)
Cdx1	3883 (+362), 3882 (+1074)
Cdx2	6428 (-242), 6427 (+7492), 6426 (+7674), 6425 (+8196)
Ceacam16	6944 (-5257)
Ceacam20	6945 (+1045), 6946 (+6351)
Cebpa	7009 (-2532)
Cela1	2964 (+8773)
Celf1	4547 (+366)
Cenpc1	6117 (-906)
Cenpl	372 (+5523)
Cenpv	1206 (+701)
Cep170b	2006 (-373)
Cerk	2899 (-8672)
Cers2	5104 (+3590)
Cers6	4481 (-930)
Ces1f	7669 (+3209)
Ces2a	7702 (-2311), 7703 (-37)
Ces2b	7706 (-3134)
Ces2c	7707 (+29)
Ces2d-ps	7708 (-184)
Ces2e	7710 (-91), 7711 (+1256)
Cfb	3483 (+11)
Cfl1	4010 (+3941)
Cfl2	1787 (+3236)
Cflar	87 (-631)
Cgn	5098 (-1158)
Cgref1	5967 (-4601), 5966 (-3286), 5965 (-41), 5964 (+978)
Chac2	1071 (+101)
Chchd7	5324 (+463), 5325 (+1230)
Chd1	3354 (-336)
Chd2	7081 (+3735)
Chd3	1233 (-8535), 1232 (+4864)
Chd9	7658 (-3277), 7659 (-2999), 7660 (+4266)
Chdh	2429 (+1108), 2430 (+3181)
Chid1	7393 (+4088)
Chka	3987 (-1749), 3988 (-1126)
Chmp3	6625 (-6235)
Chmp4b	4765 (-8741)
Chmp4c	4928 (+1155)
Chmp6	1645 (+2469)
Chn2	6572 (-3830), 6573 (+8036)
Chp2	7293 (+126), 7294 (+7108)
Chrna2	2567 (-71)
Chst3	663 (-9796)
Cib1	7108 (+773)
Cideb	2521 (-4)
Cidec	6730 (+955)
Ciita	3017 (-8017)
Cirbp	769 (+607)
Cisd3	1433 (+1275)
Cish	8301 (+909)
Ckmt2	2253 (-331)
Clca2	5289 (-4368)
Clcn4-2	6912 (-1)
Cldn14	3252 (+7650)
Cldn15	6341 (-619), 6342 (+516), 6343 (+1201), 6344 (+4186)
Cldn23	7507 (-190), 7506 (+6411)
Cldn3	6314 (-4962), 6315 (-2878)
Cldn7	1247 (-3871), 1248 (+1408), 1249 (+3574)
Clec2h	6816 (-948)
Clgn	7633 (+7036), 7634 (+7992)
Clic6	3247 (+3418)
Clint1	1091 (+3907)
Clip2	6309 (+3833)
Clk3	8122 (+6447)
Clk4	1108 (+523)
Cln6	8157 (-9872)
Cln8	7465 (-626)
Clrn3	7354 (-54), 7353 (+6713)
Cltb	2172 (+8674)
Cltc	1370 (+532), 1369 (+1010)
Cluh	1275 (-5008)
Cmbl	2683 (+1008)
Cmip	7774 (+1716), 7775 (+3420)
Cmpk2	1725 (+6817), 1726 (+8045)
Cmtm4	7697 (+7412)
Cmtm6	8349 (+1152)
Cndp1	3970 (-94)
Cndp2	3971 (+508)
Cnih	2475 (-5934), 2474 (-391)
Cnnm4	28 (+4388), 29 (+4989)
Cnot1	7694 (+1747)
Cnot10	8347 (-6998)
Cnot8	1169 (-7)
Col2a1	2936 (+3096)
Commd2	5005 (+68)
Commd6	2628 (-4459)
Comt	3062 (-6766)
Copa	419 (-4376)
Cops4	6181 (-4238)
Cops7a	6796 (-4924)
Copz1	2985 (+4936)
Coro1c	6232 (-2226), 6231 (-609), 6230 (+353), 6229 (+500)
Coro2a	5407 (+2708), 5406 (+7847)
Cox6a2	7333 (+308)
Cox6b2	6905 (+3696), 6904 (+3895)
Cox8a	4047 (-9612)
Cox8b	7371 (-8409)
Cpd	1293 (-7971), 1292 (-160)
Cplx2	2168 (+9252)
Cpne2	7679 (-2690), 7680 (-1520)
Cpox	3198 (-9360)
Cpped1	3030 (-6)
Cpt1a	3978 (+2397)
Cpt2	5560 (+1472), 5559 (+2352)
Cpvl	6571 (-7914)
Crat	4393 (+371), 4392 (+7342)
Crb3	3599 (+248)
Crbn	6713 (+5901)
Creb3l2	6494 (+94)
Creb3l3	785 (-2352), 784 (+6036), 783 (+7763)
Creb3l4	5079 (+2112)
Crebl2	6831 (-1269), 6832 (+359)
Crebzf	7152 (+146)
Crip1	2010 (-845)
Cry2	4565 (-3788)
Crygb	116 (-6766)
Cryl1	2529 (+1048)
Cryzl1	3241 (+654)
Csf2	1142 (+6948)
Csf2ra	4274 (+1327)
Csk	8120 (-2544)
Csnk1d	1667 (+6459)
Csnk1g3	3849 (-8148), 3850 (-6989), 3851 (-6799)
Cst6	4008 (-6617), 4007 (-4192)
Ctage5	1799 (+305), 1800 (+1241)
Ctcfl	4878 (-5037)
Ctdsp1	133 (+1398)
Ctdsp2	920 (-5568), 921 (-1466)
Cth	5318 (+15)
Ctnna1	3773 (-420), 3774 (+6229)
Ctnnb1	8374 (+1610)
Ctsb	2545 (+801)
Ctsz	4889 (+68)
Cttn	7416 (+2053)
Cubn	4304 (+7151)
Cx3cl1	7683 (+6785), 7684 (+9853)
Cxadr	3214 (+6637)
Cxcl2	6135 (-4371)
Cxcr1	132 (-2162)
Cyb561	1509 (-6424), 1508 (-4388)
Cyb5b	7726 (-9051), 7727 (-7960)
Cyb5r3	2870 (+7251), 2869 (+9380)
Cyp17a1	4209 (-6963)
Cyp1a1	8121 (-5554)
Cyp2c44	4193 (+4277), 4192 (+5809), 4191 (+7551)
Cyp2c55	4172 (-131)
Cyp2d22	2861 (+537)
Cyp2d26	2865 (-1886), 2864 (-283), 2863 (+6379)
Cyp2j6	5514 (-6906)
Cyp2r1	7248 (-161)
Cyp2s1	6960 (-8557)
Cyp2u1	5255 (-9326), 5254 (+8036)
Cyp3a13	6354 (-5317), 6353 (-5102)
Cyp4b1	5576 (-352), 5575 (+4098)
Cyp4f14	3459 (-8128), 3458 (+986)
Cyp4f16	3454 (-1780), 3455 (-795)
Cyp4f40	3456 (-5363)
Cyp4v3	7530 (+5965)
Cyr61	5291 (+6947)
D17H6S53E	3491 (-1671)
D17H6S56E-5	3488 (+5448)
D17Wsu92e	3406 (-424)
D1Ertd622e	214 (-120)
D4Wsu53e	5728 (+53)
D8Ertd82e	7509 (-875)
Dact2	3345 (+1193)
Dact3	6923 (-1055)
Dagla	4063 (+9142)
Dak	4065 (-156)
Dapk2	8181 (-4414), 8182 (-3980)
Dapp1	5269 (+6965)
Daw1	156 (-9390)
Dazap1	771 (+6023)
Dbi	235 (+4625)
Dbnl	997 (-6034)
Dbp	7036 (+3263)
Dcaf12	5378 (-3839)
Dcaf8	421 (-6278), 422 (+468)
Dcbld1	636 (-1289), 637 (+3202)
Dck	6127 (+3417)
Dclre1a	4251 (+377)
Dcn	853 (+8021)
Dcp1a	2431 (+80)
Dctn5	7292 (-27)
Dcun1d1	4973 (+6948)
Dcxr	1663 (+23)
Ddah1	5292 (+4367)
Ddhd1	2468 (+1881)
Ddhd2	7490 (-2042)
Ddi2	5801 (-8612), 5800 (-6036), 5799 (+1334)
Ddit4	661 (+2730)
Ddn	2943 (+4785)
Ddr1	3504 (-4498)
Ddx23	2939 (+280)
Ddx24	1948 (-161)
Ddx60	7574 (-3454)
Decr1	5345 (+2281)
Dedd	414 (-55)
Degs2	1969 (+2508), 1968 (+3912), 1967 (+7828)
Dennd1b	343 (-2009)
Dennd3	2765 (-1186)
Dennd4c	5492 (-50)
Dennd5b	6886 (+896), 6885 (+5256)
Dennd6a	2420 (-766)
Depdc7	4594 (-401)
Derl1	2727 (+1699)
Dfna5	6558 (+96), 6557 (+2006)
Dgat1	2797 (+1299), 2796 (+6092)
Dgat2	7170 (+436)
Dgcr6	3057 (+2789)
Dgka	953 (+1357), 952 (+2591)
Dgkq	6213 (+403)
Dgkz	4558 (-8548)
Dhps	7650 (-2627)
Dhrs1	2520 (+215)
Dhrs11	1355 (+1209), 1354 (+3262)
Dhrs4	2514 (-8828)
Dhrs7b	1190 (+7229)
Dhx9	355 (+724)
Diap1	3793 (+2641)
Dicer1	1954 (+5095)
Dido1	4907 (-129), 4906 (+434)
Dio1	5556 (+4150), 5555 (+7036)
Dkk4	7482 (-512)
Dlat	8079 (-827), 8078 (-38)
Dll1	3351 (+3336)
Dlst	1892 (+2693)
Dlx1	4495 (+4120)
Dmtf1	5917 (+239)
Dmxl1	3845 (+382)
Dnajb12	659 (+1433)
Dnajc22	2947 (+55)
Dnajc24	4596 (+282)
Dnajc25	5450 (-5840)
Dnajc28	3239 (-35)
Dnase1	2991 (-7331), 2992 (-4355)
Dnhd1	7207 (+133)
Dnm1	4412 (-7505)
Dnm2	7989 (-225)
Dnmbp	4188 (-6544)
Doc2g	3992 (-668)
Dock5	2573 (+834)
Dock6	7991 (-2607)
Dok4	7685 (+4612)
Dolpp1	4390 (+590), 4391 (+1293)
Dpp4	4476 (-8098), 4475 (+8500)
Dppa3	6781 (-1071)
Dpyd	5190 (+4903)
Dqx1	6634 (+188)
Dram2	5164 (-495)
Drc1	5958 (-1855), 5959 (+4100)
Dsc2	3736 (-326)
Dscr3	3253 (-969)
Dsg2	3740 (-3658), 3741 (+125)
Dtd2	1767 (-7733)
Dtx3l	3154 (-332)
Dtx4	4078 (-215)
Dusp12	408 (+315)
Dusp5	4230 (+608)
Dusp6	861 (-9592)
Dusp8	7399 (+8605)
Dyrk1a	3255 (+4505)
Dyrk2	895 (+1528)
E2f2	5740 (+1226), 5741 (+2155), 5742 (+3704)
E2f3	2066 (-3040), 2065 (-791)
E430018J23Rik	7327 (+613)
Ebpl	2544 (-708)
Ece1	5756 (-340)
Echs1	7369 (-26)
Eci1	3372 (+987)
Eci3	2089 (-2057), 2088 (-1212), 2087 (-279)
Ect2	4942 (-1204)
Edem1	6721 (+1253), 6722 (+9548)
Edf1	4346 (+361), 4347 (+4883)
Edn1	2124 (+5980)
Edn2	5625 (+6683), 5626 (+9357)
Edn3	4895 (-402)
Eef1b2	106 (+180)
Eef1e1	2112 (+190)
Eef2	790 (-205)
Eepd1	7994 (+7291)
Efcab14	5577 (-5643)
Efhd2	5804 (+2008), 5803 (+3756)
Efna1	5072 (-1721), 5071 (+1301)
Efr3b	1686 (+2522)
Egln2	6961 (+431)
Ehbp1l1	4017 (+1391), 4016 (+3122)
Ehd1	4030 (-4412), 4031 (+1583), 4032 (+9165)
Ehhadh	3075 (-914), 3074 (-374)
Eif1ad	4009 (+8066)
Eif2a	5008 (-47)
Eif2ak2	3646 (-91)
Eif4e3	6704 (+4421)
Eif4ebp3	3787 (-2703)
Eif4g1	3072 (-159)
Eif4h	6310 (-8262)
Eif5	1992 (+698)
Eif6	4774 (-131), 4773 (+6886)
Elac1	3943 (-2116), 3942 (+7820)
Elf3	321 (+4395), 320 (+6984), 319 (+9752)
Elk4	273 (+767)
Eln	6311 (+3057)
Emc9	2515 (-577)
Emp1	6836 (-639)
Endov	1639 (+2627)
Enoph1	6176 (-274)
Enpep	5240 (+7462)
Enpp7	1628 (-9121), 1629 (-5692), 1630 (-5304), 1631 (-13)
Ensa	5105 (+1298)
Entpd2	4345 (+420)
Entpd5	1889 (+42)
Entpd8	4334 (-96), 4335 (+5002)
Eny2	2718 (+43)
Epcam	3699 (-7602)
Epha1	6518 (+2687), 6517 (+3038)
Epha2	5785 (+7410)
Ephb2	5751 (-6986)
Epn1	6908 (-69), 6909 (+7889)
Epn3	1405 (-4454)
Eps8l2	7386 (+1381), 7387 (+4944)
Eps8l3	5167 (-9840), 5168 (-7172), 5169 (-3465), 5170 (-87)
Ept1	5956 (-446)
Erbb2	1439 (-3543)
Erbb2ip	2311 (+9791)
Erbb3	951 (-9887), 950 (-8944), 949 (+789), 948 (+1769)
Ercc6	2446 (-76)
Erlin1	4196 (+5575)
Errfi1	5857 (-3966)
Espnl	192 (-9630)
Esrp1	5335 (-1750)
Esrra	4042 (+1826)
Etfa	8103 (+274)
Etfb	7022 (+206)
Etohi1	4897 (+4424)
Eva1c	3226 (-1104)
Evc2	5944 (-8933276), 5945 (-8839738), 5946 (-8609260), 5947 (-8584305), 5948 (-8321338), 5949 (-8283832), 5950 (-8203117), 5951 (-8190933)
Evpl	1595 (-3900)
Exoc3l4	1990 (+5522)
Exoc6	4157 (-6631), 4158 (-5001), 4159 (+431)
F11r	415 (-1949), 416 (+4034)
F3	5197 (-543)
Faah	5584 (-4501), 5583 (+812)
Fadd	7417 (+780)
Fahd1	3378 (+1487), 3377 (+2738)
Fam102a	4419 (-9358)
Fam109a	6266 (+6372), 6267 (+7386), 6268 (+9581)
Fam110c	1732 (-5), 1733 (+6655)
Fam118a	2886 (-199)
Fam120a	2148 (+5277)
Fam120b	3352 (-2330)
Fam126a	5922 (+335)
Fam133b	5905 (+2534)
Fam151a	5547 (-2871), 5548 (+5035)
Fam159a	5568 (-9325), 5567 (-8056)
Fam160a2	7206 (-271), 7205 (+4474)
Fam160b1	4257 (+4184), 4258 (+7166)
Fam168a	7188 (-6629)
Fam173a	3381 (+216)
Fam180a	6488 (+4966)
Fam186a	2957 (+1347)
Fam187b	7000 (+8502)
Fam207a	726 (+5776)
Fam20b	363 (-8699)
Fam211b	710 (-5731), 709 (-5240), 708 (-3763)
Fam213b	5879 (+823)
Fam214b	5383 (+7080)
Fam35a	2450 (+7634), 2449 (+7737)
Fam3b	3268 (+5255), 3267 (+7078)
Fam47e	6144 (-61)
Fam50b	2084 (+3292), 2085 (+3799), 2086 (+7476)
Fam65c	4861 (-5395), 4860 (+3959)
Fam69b	4357 (-6966)
Fam78a	4406 (+2969), 4405 (+9208)
Fam83b	8213 (+5797)
Fam83c	4775 (-3229)
Fam83f	2844 (+3185)
Fam84b	2742 (+549), 2741 (+2543)
Fam96b	7699 (+3249)
Fam98c	6987 (-391)
Fancf	7059 (-126)
Far2	6881 (+1194)
Farp2	205 (-374)
Fas	4150 (-420)
Fau	4022 (+1314)
Fblim1	5796 (+3987)
Fbln1	2887 (+957)
Fbln5	1936 (+3055)
Fbp1	2198 (-5339)
Fbp2	2197 (-6)
Fbxl18	6389 (-2260)
Fbxl3	2633 (-3343)
Fbxo22	8100 (+261)
Fbxo25	7464 (+6224)
Fbxo34	2480 (+1512)
Fbxo5	501 (-3699)
Fbxo6	5818 (+2972)
Fbxo8	7560 (+1247)
Fcamr	265 (-2191)
Fcgr2b	409 (-5625)
Fdxr	1563 (-517)
Fem1c	3835 (+1244)
Fermt1	4705 (-1328), 4704 (+6660)
Fez2	3645 (+2640)
Fgd4	3043 (+4472)
Fgf11	1243 (-1846), 1242 (-1639)
Fgf9	2533 (-2297), 2534 (-1751), 2535 (-536)
Fgr	5689 (-77)
Fhad1	5807 (+7602)
Fhdc1	5043 (+8457)
Fhl2	55 (+4430)
Fkbp11	2942 (-4083)
Fkbp1b	1689 (-2294), 1688 (-1794), 1687 (+4691)
Fkbp4	6813 (-7713)
Fkbp8	7591 (+534)
Flnb	2351 (-9988), 2352 (+6869)
Flywch1	3361 (+2526)
Fmo4	374 (-778)
Fmo5	5126 (+1308)
Fndc7	5178 (-3111)
Fosl2	5975 (+939)
Foxd2	5574 (-185)
Foxj3	5619 (-604), 5620 (-335)
Foxn2	3701 (-2699)
Foxn3	1911 (-5)
Foxo1	4998 (+1788)
Foxo3	610 (+5879), 609 (+8398)
Foxp4	3566 (+6367)
Frat2	4180 (-9688)
Frs3	3564 (-56)
Fsbp	5337 (-3834)
Fsd1	3585 (+3950)
Fsip1	4616 (+200)
Fth1	4060 (-5465), 4061 (+990)
Ftl1	7034 (-1312)
Ftsj3	1511 (+6511)
Fubp1	5312 (-1745)
Fuca1	5737 (-2358)
Fuca2	518 (-6833)
Fuk	7742 (-140)
Furin	7110 (+2027)
Fyttd1	3127 (-1725)
Fzd1	5911 (-391)
Fzd4	7146 (+6198)
Fzd5	110 (-5189)
G630090E17Rik	589 (-60)
G6pc	1473 (-5110), 1474 (-2614), 1475 (-126)
Gab1	7628 (+6584)
Gabarapl1	6819 (-392)
Gabpb1	4662 (+6495)
Gadd45a	6613 (+7941)
Gadd45g	2150 (+1574)
Gal3st1	982 (-1116)
Gal3st2	209 (+1417)
Galk1	1590 (-3777), 1589 (+7181)
Galm	3653 (+704)
Galnt10	1160 (-285)
Galnt2	7843 (+619)
Galnt6	2967 (-9211), 2966 (-1899), 2965 (+7186)
Galnt7	7565 (+2840), 7564 (+3316)
Galt	5381 (+5320)
Gamt	770 (-381)
Gan	7773 (-1778)
Ganc	4640 (-20)
Gapdh	6799 (+2453)
Gas2l1	990 (-13)
Gas2l3	828 (+4352)
Gata4	2548 (-869), 2547 (-189), 2546 (+7830)
Gata5	4904 (-8589), 4903 (+5064)
Gatsl2	6304 (+2342)
Gba2	5386 (+68)
Gbf1	4203 (+494)
Gcat	2825 (+94)
Gcc1	6471 (-184)
Gcc2	645 (+20), 646 (+3463)
Gchfr	4625 (-141)
Gcnt2	2114 (-9236), 2115 (-7998)
Gcnt4	2278 (+1670)
Gcom1	8207 (+2194), 8206 (+7347)
Gcsh	7771 (+411)
Gde1	7272 (-2280)
Gdf15	7593 (-4969)
Gfer	3374 (+663)
Gfod2	7716 (-25)
Gfpt1	6659 (+2030)
Gga1	2824 (-73)
Ggact	2656 (+3600)
Ggnbp2	1357 (-491), 1356 (+336)
Ggt6	1266 (-324)
Ghitm	2464 (-4231)
Ghr	2660 (-1316)
Gimap5	6550 (-3527)
Gin1	215 (-855), 216 (-66)
Ginm1	506 (-5869)
Gipc2	5311 (+302), 5310 (+819)
Glg1	7743 (-5664)
Glrx	2236 (-4165), 2237 (+3616)
Gltp	6235 (+839)
Gltscr1	6915 (+6079)
Glyctk	8292 (+7)
Gm10030	8336 (-5973), 8337 (-1212)
Gm10073	7723 (-8088)
Gm10198	2329 (+5414)
Gm10253	5069 (-7356)
Gm10277	1304 (+1660)
Gm10322	653 (-8345)
Gm10384	2703 (-2000), 2702 (+3254)
Gm10430	6108 (-4857)
Gm10463	5974 (-1466)
Gm10634	8238 (-7074)
Gm10642	8202 (+54)
Gm10655	8147 (+4232)
Gm10718	7921 (-3628), 7922 (-3328), 7923 (-2990), 7924 (-2581), 7925 (-1929), 7926 (-1384), 7927 (-994), 7928 (-561), 7929 (+57), 7930 (+340), 7931 (+592), 7932 (+981), 7933 (+1550), 7934 (+1997), 7935 (+2280), 7936 (+2858), 7937 (+3221), 7938 (+3666), 7939 (+4073), 7940 (+4292), 7941 (+4601), 7942 (+4813), 7943 (+5062), 7944 (+5292), 7945 (+5921), 7946 (+6210), 7947 (+6643), 7948 (+7113), 7949 (+7754), …
Gm10720	7891 (-7106), 7892 (-6966), 7893 (-6226), 7894 (-5852), 7895 (-5629), 7896 (-5378), 7897 (-4675), 7898 (-4540), 7899 (-4099), 7900 (-3937), 7901 (-3818), 7902 (-3500), 7903 (-3349), 7904 (-2846), 7905 (-2603), 7906 (-2404), 7907 (-2176), 7908 (-1914), 7909 (-1517), 7910 (-819), 7911 (-283), 7912 (+67), 7913 (+412), 7914 (+931), 7915 (+1478), 7916 (+1818), 7917 (+2390), 7918 (+2917), 7919 (+3491),…
Gm10722	7872 (-562), 7873 (-142), 7874 (+50), 7875 (+462), 7876 (+870), 7877 (+1196), 7878 (+1828), 7879 (+2159), 7880 (+2527), 7881 (+3262), 7882 (+3745), 7883 (+4303), 7884 (+4753), 7885 (+4916), 7886 (+5520), 7887 (+5874), 7888 (+6289), 7889 (+6686), 7890 (+7106)
Gm10766	4666 (+29)
Gm10787	723 (+5912)
Gm10800	4585 (+120), 4584 (+505), 4583 (+850), 4582 (+996), 4581 (+2151)
Gm10801	4577 (+133), 4578 (+498), 4579 (+666), 4580 (+1638)
Gm11127	3510 (-215)
Gm11128	6648 (-1515)
Gm11437	1352 (+2782)
Gm11696	1534 (-881)
Gm11938	1458 (-1631)
Gm11992	1017 (+447)
Gm12500	5174 (-279)
Gm129	5110 (-2388)
Gm13547	4384 (+9986)
Gm14137	4626 (+2407)
Gm14221	4806 (-2095)
Gm16253	5115 (-2462), 5116 (-1208)
Gm20498	1862 (+352), 1861 (+4330)
Gm20518	3054 (+459)
Gm2840	7051 (-2128), 7052 (+947), 7053 (+7319)
Gm3054	6345 (-4936)
Gm4204	317 (-4824), 318 (+2464)
Gm4981	644 (+2805), 643 (+4740)
Gm5475	2960 (-244)
Gm5549	5258 (+2508)
Gm572	5819 (-3686)
Gm5884	6815 (-3701)
Gm6289	5290 (+8829)
Gm6484	7990 (+77)
Gm7030	3514 (-245)
Gm7092	6959 (+59), 6958 (+8510)
Gm711	4360 (+9388)
Gm7168	3341 (+9973)
Gm7589	8133 (-7876), 8132 (+2357)
Gm7676	7463 (+1356)
Gm826	4802 (-5676), 4801 (-4786)
Gm8444	2854 (+6591), 2853 (+8028), 2852 (+8561)
Gm8597	3331 (-3898)
Gm8909	3518 (-36), 3517 (+681)
Gm9765	418 (+9881)
Gm9803	621 (-6905)
Gm9821	4557 (-6203)
Gm9992	3309 (+2117), 3308 (+9485)
Gmfg	6974 (-56)
Gna11	800 (-5148), 799 (-3780), 798 (-1489), 797 (+3290)
Gnai2	8308 (-9994)
Gnat1	8309 (+4483)
Gnb1	5889 (-2426)
Gngt2	1417 (-5437)
Gnpda1	3798 (-2661), 3797 (-68)
Gnptab	824 (+994)
Golga4	8362 (+602)
Golim4	5032 (+223)
Golm1	2196 (+6981)
Golt1a	294 (+229)
Gorasp1	8371 (+3576), 8370 (+4985)
Gosr2	1502 (+8133)
Gp1ba	1253 (-8871)
Gp1bb	3064 (+3398)
Gp6	6895 (-294)
Gpa33	395 (+11)
Gpam	4235 (-1503)
Gpatch1	7010 (+7000)
Gpatch4	5056 (-5)
Gpatch8	1493 (-1414)
Gpbp1l1	5590 (+3312)
Gpcpd1	4700 (+34)
Gpd1	2953 (-1396), 2954 (+1156)
Gpd2	4456 (-3125)
Gpi1	7004 (+4055)
Gpnmb	6554 (-8407)
Gpr107	4397 (+42), 4398 (+8469)
Gpr125	6024 (-701)
Gpr133	6298 (-3419), 6299 (-2365)
Gpr151	3824 (-1111)
Gpr155	4509 (+603)
Gpr157	5841 (+6666)
Gpr160	4964 (-8319), 4965 (+309)
Gpr37l1	311 (-7697), 310 (-1348)
Gpr84	2986 (+4246)
Gpr89	5119 (+2778)
Gpsm2	5177 (+7177)
Gpt	2804 (-6221), 2805 (-491)
Gpx1	8319 (+4260)
Gpx4	761 (-1806), 762 (+95), 763 (+2779)
Gramd1c	3166 (-1546)
Gramd2	8135 (-4333), 8136 (-1235), 8137 (-585)
Gramd3	3861 (+7316)
Grb2	1578 (-8096)
Grb7	1441 (-153), 1442 (+1411)
Grin2d	7041 (-1514)
Grin3b	758 (-3482)
Grtp1	7459 (-301), 7458 (+1053)
Gsc	1953 (+5785)
Gsdmd	2781 (-8181), 2782 (+774)
Gse1	7807 (+2871), 7808 (+3500), 7809 (+4293), 7810 (+6811)
Gsk3a	6950 (-743)
Gskip	1956 (+2209)
Gss	4769 (+510)
Gstm3	5173 (-8567), 5172 (+12)
Gstp2	3994 (-4736)
Gstt1	714 (+3480)
Gstt2	716 (-2619), 715 (+327)
Gtf3a	6421 (-6542), 6422 (-5276)
Gtf3c2	5969 (+24)
Gtl3	7693 (+4543)
Guca2b	5623 (-1156), 5622 (+500)
Gucd1	707 (+1004)
Gucy2g	4236 (-4462)
Guk1	1175 (-3496)
Gzf1	4736 (+7154)
Gzmm	751 (+7294)
H2-Aa	3467 (-4807)
H2-Bl	3512 (-29), 3511 (+601)
H2-D1	3492 (-220), 3493 (+6719)
H2-K1	3465 (+656)
H2-Oa	3466 (+4441)
H2-Q1	3496 (-25), 3497 (+5587)
H2-Q2	3498 (+62), 3499 (+703), 3500 (+5577)
H2-Q6	3501 (-260)
H2-T23	3509 (-2738), 3508 (-2333)
H2-T3	3521 (-73), 3520 (+140), 3519 (+7841)
H2afj	6843 (-269), 6844 (+3136)
H6pd	5840 (+6615)
Hadh	5253 (-748), 5252 (+762), 5251 (+7794), 5250 (+8168)
Hadhb	5955 (+249)
Harbi1	4555 (+7531)
Haus2	4641 (+9304)
Haus8	7602 (-9070)
Hbegf	3783 (+1397)
Hbs1l	547 (+8861)
Hcrtr1	5670 (+8140)
Hdgf	5055 (+4537)
Hdhd3	5461 (-950), 5460 (+1292)
Heatr6	1345 (+8889)
Hectd2	4155 (-407)
Helz	1520 (-1774)
Helz2	4910 (-7475)
Herpud1	7676 (+1192)
Hes2	5862 (+2114), 5863 (+3018)
Hgd	3156 (+4630)
Hhatl	8386 (-6812)
Hiatl1	2208 (+930)
Hif1a	1820 (-2693)
Hint1	1147 (+805)
Hint2	5387 (+187)
Hip1r	6284 (-4220)
Hira	3069 (+596)
Hist1h1a	2057 (+3257)
Hist1h2ah	2054 (+769)
Hist1h4n	2053 (+6229)
Hivep1	2122 (+50)
Hjurp	180 (+304)
Hkdc1	673 (+6634)
Hmbox1	2560 (-4605)
Hmgcr	2277 (+7400)
Hn1	1576 (+4358), 1575 (+4573), 1574 (+4835)
Hnf1a	6238 (-87), 6237 (+2081), 6236 (+5660)
Hnf1b	1347 (-95)
Hnf4a	4815 (-5444)
Hnrnpc	2495 (-42)
Hook2	7648 (-929), 7649 (+208)
Hopx	6115 (+7815)
Hoxb13	1422 (-6828)
Hpdl	5597 (-71)
Hps3	4934 (+1394)
Hps4	6219 (+1481)
Hrh1	6737 (-1089)
Hs6st1	25 (+6825)
Hsd17b13	6202 (-118)
Hsd17b2	7782 (-6060), 7783 (+2133)
Hsd17b4	3846 (+690)
Hsd17b6	941 (-5011), 940 (+3750)
Hsd3b3	5134 (-9669), 5133 (-8939)
Hsp90b1	823 (+5051)
Hspa12a	4267 (+7444)
Hspa4	1121 (-7836)
Hspe1	71 (+318)
Htr2a	2601 (+9398)
Hyal2	8302 (-1363), 8303 (+352), 8304 (+2208)
I830012O16Rik	4154 (-221)
Icam1	7986 (+102)
Ick	8222 (+8666)
Id1	4753 (-2816), 4754 (+3268), 4755 (+3571)
Id2	1724 (-1364)
Idh1	117 (+1114)
Ier2	7643 (+5800)
Ier3	3505 (+527)
Ifi27l1	1949 (-640)
Ifi35	1476 (+4131)
Ifit3	4153 (-212)
Ifnar1	3234 (-300)
Ifnar2	3229 (+9518)
Ifngr1	540 (-2061), 541 (+2485), 542 (+2687)
Ifngr2	3236 (+5175)
Ifnl2	6975 (-380)
Ifrd2	8305 (+3257)
Ift20	1318 (+2283)
Igsf5	3264 (+1293)
Igsf9	425 (+918), 426 (+6804)
Ikbke	270 (+4494)
Il10rb	3230 (+3592), 3231 (+7105)
Il15	7630 (+11)
Il17b	3897 (-8245)
Il17ra	6770 (-8477), 6771 (-8242)
Il1rn	4329 (-9603)
Il22ra1	5733 (-93), 5734 (+1292)
Il31ra	2337 (+2428)
Il4ra	7307 (-253)
Il7	4917 (+722)
Ilvbl	747 (+157), 748 (+953)
Imp3	8112 (+455)
Inadl	5517 (+585)
Ino80c	3756 (-7401)
Inpp5b	5642 (+6242)
Insig1	5941 (-4926)
Insr	7426 (+1381)
Ints8	5334 (+43)
Ip6k1	8314 (+2899)
Ipcef1	500 (-2842)
Ipmk	691 (+68), 692 (+1335), 693 (+2246)
Iqgap1	7117 (+465)
Iqgap2	2272 (+908)
Irak2	6731 (+1073)
Irf1	1128 (-7954), 1129 (-7430), 1130 (-7114), 1131 (-5657), 1132 (-4220), 1133 (+2165)
Irf2	7537 (+2476)
Irf2bp2	7851 (-930), 7850 (+9618)
Irf6	491 (+3659)
Irgm1	1095 (-2487)
Irgm2	1170 (-296)
Islr2	8126 (-3046)
Isoc1	3868 (+1116)
Ist1	7733 (+523)
Itga1	2345 (+122)
Itga3	1412 (+1853)
Itgb2	727 (-1463)
Itgb3bp	5525 (-199)
Itgb4	1588 (-3749)
Itpk1	1945 (-4136), 1944 (+6783)
Itpka	4637 (+2486)
Itpkc	6963 (+3162)
Itpr3	3402 (+9079)
Itpripl1	4664 (-53)
Itpripl2	7266 (-1532)
Iws1	3765 (-9417)
Iyd	504 (-113), 503 (+241)
Jak1	5527 (-440)
Jak2	4127 (-10000)
Junb	7647 (-3002), 7646 (-1720)
Jup	1465 (+253)
Kank1	4119 (+9258)
Kbtbd2	6591 (+9779)
Kcng4	7798 (-5527), 7797 (+7945)
Kcnk5	2382 (-8176)
Kctd13	7313 (-7115)
Kctd17	2820 (+3265)
Kctd2	1566 (+1104)
Kctd20	3424 (+9349)
Kdelc2	8086 (-6894), 8087 (-6516)
Kdelr1	7042 (+423)
Kdelr2	6395 (-3145), 6396 (+1624)
Kdm6b	1236 (-4093), 1235 (+2308), 1234 (+3807)
Khdrbs1	5668 (-2)
Khk	5963 (+3918)
Kif11	4156 (-154)
Kif15	8395 (+2122)
Kif21b	330 (-5010), 331 (+3917), 332 (+5935)
Kif23	8152 (+545)
Kifc3	7688 (-2191)
Klc4	3558 (-36)
Klf1	7645 (+1486)
Klf3	6072 (-4200)
Klf6	2030 (+2283)
Klf9	4106 (-7932)
Klhl22	3053 (-587)
Klrb1a	6814 (-8457)
Krt19	1461 (-7577)
Krt23	1456 (+3795)
Krt8	2976 (+1156)
Krt80	2974 (-3353)
Krtap3-1	1457 (-667)
Krtap31-1	1460 (-8703)
Krtap4-8	1459 (+3020)
Krtap5-3	7401 (+4396)
Krtap5-5	7402 (-1618)
Krtdap	6998 (+4192)
Kxd1	7590 (+422)
Lad1	324 (-8196), 325 (-7147), 326 (-6344), 327 (+1699)
Lama3	3730 (+929)
Lama5	4900 (-1833)
Lamp2	8433 (+1395)
Lap3	6017 (-1799)
Lasp1	1434 (+2459)
Lax1	298 (-4312), 297 (+4168)
Lbp	4795 (-3468)
Lclat1	3632 (-273)
Lcn5	4348 (+933)
Lcor	4178 (-7622)
Lct	259 (+4961)
Lctl	8171 (+3864)
Ldb3	2458 (+14), 2457 (+491), 2456 (+2779), 2455 (+3109)
Leap2	1122 (-128)
Lect2	2184 (-7237)
Lekr1	5021 (-6620), 5022 (+276)
Leprel4	1466 (+3005)
Letmd1	2962 (-6732)
Lgals3bp	1624 (-8143), 1623 (+1713)
Lgals4	6977 (-2207), 6978 (+18), 6979 (+4153)
Lgals8	2041 (+4591)
Lgals9	1327 (+2789)
Lgalsl	1045 (-296)
Lgr4	4597 (-2910)
Lif	986 (-517), 987 (+407), 988 (+8496)
Lig4	7439 (+360)
Lima1	2955 (+9215)
Limd1	8402 (+8131)
Lipa	4152 (+9001), 4151 (+9166)
Lipe	6953 (+3688)
Lipn	4148 (+7164)
Lipt2	7183 (-1260)
Litaf	3021 (-9338)
Llgl2	1582 (+1016)
Lmbr1	5952 (-82)
Lmbr1l	2946 (-6640)
Lmna	5065 (-9495)
Lnpep	3356 (-609)
Lnx2	6423 (+37)
Lonp1	3595 (-403)
Lpar1	5447 (+202), 5446 (+7088)
Lpar5	6797 (-8457)
Lpcat3	6788 (+582)
Lpgat1	475 (+1372)
Lpin2	3628 (-2285)
Lpp	3092 (-630), 3093 (+9635)
Lpxn	4079 (+5826)
Lrba	5049 (+7185)
Lrig2	5151 (-7352)
Lrig3	915 (-1365)
Lrp1	929 (-987), 928 (+1030), 927 (+8828)
Lrp12	2716 (+2066)
Lrp4	4552 (+8636), 4553 (+8942)
Lrp5	3983 (-4826)
Lrrc1	8215 (-1294)
Lrrc16a	2059 (-6742)
Lrrc19	5505 (0)
Lrrc20	667 (-8705)
Lrrc3	733 (+2253)
Lrrc48	1186 (+2735)
Lrrc59	1408 (+3447)
Lrrc72	1753 (-8156)
Lrrc8b	6205 (+3301)
Lrrc8d	6206 (+2807)
Lrrfip1	190 (+4129), 191 (+8529)
Lsm4	7597 (+6814)
Ltbr	6802 (-23)
Lurap1l	5480 (-1602), 5481 (+1141)
Ly75	4471 (+7470)
Lyn	5323 (-86)
Lypla1	5 (-5163), 6 (+307)
Lysmd3	2245 (+6641)
Lysmd4	7071 (-6142), 7072 (-294)
Lyz1	886 (-114)
Lyzl4	8382 (+7655)
Lzic	5836 (+4600)
Lztr1	3051 (+436)
Lzts3	4684 (-418)
Maf	7761 (-977), 7760 (-414), 7759 (+1744)
Mafg	1661 (+2106)
Mafk	6375 (+597), 6376 (+1906)
Mag	6999 (+4856)
Magi1	6693 (-1012), 6692 (-353)
Mall	4670 (-6052), 4669 (-5107), 4668 (+5539)
Manbal	4781 (-7558)
Manea	5347 (+173)
Map1lc3b	7815 (+527)
Map2k3	1191 (+2928)
Map3k1	2333 (+4631)
Map3k11	4015 (+619)
Map4	8330 (+8839)
Mapk13	3416 (+6032)
Mapk14	3414 (+2926), 3415 (+5546)
Mapk1ip1l	2477 (-1902)
Mapk3	7311 (+588), 7312 (+2148)
Mapk6	8212 (+703)
Mapk8	2448 (+583)
Mapkap1	4427 (+59)
Mapre3	5960 (+4471)
2016-03-02	452 (-6684), 451 (+8129)
2016-03-07	4468 (+4558)
Mars2	75 (+5232)
Marveld3	7739 (+2116), 7738 (+4902)
Mast3	7601 (-1003), 7600 (-537), 7599 (+9386)
Matk	794 (-9304)
Matn3	1708 (-2231)
Maz	7316 (-1146)
Mb21d2	3104 (+2054)
Mcfd2	3688 (+127)
Mcm10	4288 (+236)
Mcoln2	5296 (+1022)
Mdh2	6329 (+4581)
Mdp1	2518 (+2231)
Me2	3944 (+5210)
Med13	1360 (+7238)
Med16	757 (+353)
Med29	6973 (+3113)
Med31	1265 (-132)
Med9	1180 (-8096)
Mef2d	5057 (-9976)
Mep1a	3540 (-1066), 3539 (-56)
Mep1b	3753 (+1424)
Mertk	4673 (+360)
Mesdc1	7129 (+5628)
Mesdc2	7130 (+233)
Mesp1	7093 (+3748)
Metrnl	1680 (-3824)
Mettl20	6888 (-3429), 6889 (+7140)
Mettl7b	957 (-68)
Mfn2	5817 (+1641)
Mfng	2823 (-5270)
Mfsd6l	1228 (+9176)
Mfsd7a	6210 (-5347)
Mfsd7b	468 (-3898)
Mfsd8	4981 (+1822)
Mgam	6509 (-280)
Mgat1	1100 (+1274)
Mgat4b	1106 (-1449)
Mgat5	253 (-5583), 254 (+9825)
Mgea5	4201 (+107)
Mgst3	400 (+3955), 399 (+9591)
Mia2	1798 (+68)
Micalcl	7236 (-66)
Micall2	6374 (-1861), 6373 (-1575), 6372 (+5937)
Micu1	657 (-348)
Micu2	2532 (+9885)
Midn	767 (-1454), 768 (+837)
Minpp1	4143 (-4020)
Mkln1	6480 (-357)
Mkrn1	6504 (-6448), 6503 (-608)
Mlec	6242 (+2228)
Mll3	5934 (-1061)
Mllt6	1431 (-4296), 1432 (-1285)
Mlph	186 (-5364), 187 (+6821)
Mlst8	3373 (+537)
Mlxipl	6320 (+1467)
Mlycd	7788 (+5381)
Mmd	1388 (+2767)
Mme	5016 (-1421)
Mmp23	5891 (-1291)
Mnt	1277 (-7710)
Moap1	1947 (+6509)
Mob1b	6126 (+7065)
Mob2	7398 (-7609)
Mob3b	5360 (+1354), 5359 (+1880)
Mob3c	5578 (-5418), 5579 (-4579), 5580 (-199), 5581 (+247)
Mocos	3758 (+50), 3759 (+471)
Mocs1	3577 (+1013)
Mogat2	7177 (-3743), 7176 (+1449), 7175 (+8446)
Mon1a	8311 (+2386)
Mon2	910 (+4270)
Morc1	3176 (-8439), 3177 (-7027)
Mospd3	6350 (+149)
Mov10	5161 (+37)
Mpi	8117 (+2195)
Mpnd	3586 (-1611)
Mpp5	1844 (+722)
Mppe1	3929 (+189)
Mpst	2819 (+2821)
Mroh2a	178 (-6555)
Mrpl15	4 (+1337)
Mrpl16	4074 (-94)
Mrpl32	2044 (-82)
Mrpl34	7605 (+43)
Mrpl35	6626 (-116)
Mrps18b	3507 (+643)
Ms4a10	4069 (-2100), 4068 (-81)
Ms4a8a	4072 (-24)
Msh3	2256 (-580)
Mst1	8315 (+5080)
Mst1r	8312 (-5173), 8313 (+70)
Mterfd3	819 (+2516), 818 (+3884)
Mthfs	8239 (+7173)
Mtmr11	5112 (-1617), 5113 (-705)
Mtmr12	2673 (+1729)
Mtmr4	1377 (+830), 1378 (+2901)
Mtmr7	7513 (-205)
Mtss1	2734 (+3916)
Muc13	3135 (-6928), 3136 (+400)
Muc4	3124 (-6939), 3125 (+4631)
Mul1	5764 (+1762)
Mut	3534 (+129)
Mvb12a	7606 (+149)
Mx2	3269 (-6731)
Mxi1	4225 (-4633)
Mybphl	5176 (+3030)
Mycl1	5635 (+574)
Myh10	1229 (-2841)
Myh14	7023 (-2711)
Myl1	120 (+3999)
Myl12b	3625 (-69), 3624 (+2088)
Mynn	4963 (+868)
Myo15	1188 (-3071)
Myo18a	1303 (-4714)
Myo1a	933 (-1734), 934 (-576)
Myo1e	8197 (-1324)
Myo5b	3946 (+67), 3947 (+1862)
Myo6	8223 (-6678)
Myo7a	7161 (-1004), 7160 (+270), 7159 (+1383)
Myo7b	3762 (-1327), 3761 (-75)
Myom3	5736 (-6719)
Myrf	4062 (+4752)
Myrfl	883 (+9047)
N4bp2	6079 (-360)
Naa60	2988 (+2466)
Naaladl1	4024 (-1070)
Nab2	932 (+4205), 931 (+5286)
Nadk	5890 (+9060)
Nadsyn1	7412 (+184)
Nags	1489 (-351), 1490 (+716)
Naif1	4413 (-9601)
Naip2	2292 (+265)
Naip5	2293 (-682)
Naip6	2294 (+282)
Nap1l4	7408 (+275)
Naprt1	2784 (-85), 2783 (+1692)
Nars	3903 (+3218)
Nat2	7578 (+617), 7579 (+3013)
Nat8	6649 (-173)
Nat8b	6650 (+3870)
Nat9	1562 (+5219), 1561 (+8402), 1560 (+9413), 1559 (+9696)
Nbl1	5770 (+3851)
Nbr1	1479 (+4618)
Nck1	8273 (-286)
Ncoa2	15 (-348)
Ncoa4	2445 (+161)
Ncor2	6292 (-1031)
Ndfip2	2636 (+8444)
Ndst1	3879 (+1792)
Ndst2	2391 (-3038)
Ndufa2	3791 (+165)
Ndufa6	2860 (-7238)
Ndufab1	7291 (+341)
Ndufaf2	2318 (+5749)
Necap1	6782 (+432), 6783 (+4790)
Nek5	7477 (-7152)
Nelfcd	4888 (+198)
Nemf	1804 (-4269)
Neu2	171 (-4809)
Neu3	7182 (-9447)
Neurl1b	3395 (+2839), 3396 (+6045)
Neurl3	27 (-1093)
Nfam1	2867 (+7747)
Nfat5	7728 (-6713)
Nfatc3	7718 (-5208)
Nfe2	2984 (+5110)
Nfe2l2	4520 (-8526), 4519 (-2934), 4518 (-576), 4517 (+38), 4516 (+7286)
Nfia	5515 (+107)
Nfib	5487 (-6389), 5486 (-3231), 5485 (+948)
Nfil3	2161 (-428), 2160 (+6277)
Nfkbie	3549 (+203)
Ngly1	2370 (-1897)
Nhlrc2	4252 (+265)
Nipsnap1	989 (+9035)
Nkx1-2	7343 (+9830)
Nlrc4	3641 (-4591), 3640 (-92)
Nlrp1b	1261 (-1591), 1260 (+1842)
Nlrp6	7372 (-7729), 7373 (-40), 7374 (+1857), 7375 (+6500)
Nme2	1394 (-5337), 1393 (+6000)
Nmi	4453 (+2165)
Nmrk2	791 (+8633)
Nmt1	1495 (-128)
Nnt	2348 (+8518)
Nod2	7657 (-3943)
Nomo1	7047 (+3946)
Nop16	2171 (+7044)
Nop2	6798 (-496)
Nos1ap	407 (-177)
Nosip	7029 (-577)
Nostrin	4484 (-82)
Noxa1	4336 (+7146)
Noxo1	3375 (+1640), 3376 (+3448)
Npas2	45 (-6978), 46 (-1274), 47 (+5363)
Npc1	3726 (+7485)
Npc1l1	1002 (-3073)
Npl	356 (+6796)
Nptn	8130 (+7756)
Nptx1	1641 (-2324)
Nqo2	2074 (-70)
Nr1d1	1445 (-1577)
Nr1d2	2375 (-149)
Nr1h3	4548 (-86)
Nr1i2	3162 (-16), 3161 (+6894)
Nr1i3	412 (-15)
Nr2c1	834 (+5369)
Nr2f2	7077 (-1179)
Nr2f6	7603 (-842)
Nr4a2	4455 (-9389)
Nrap	4249 (-530)
Nrarp	4339 (-5192)
Nrxn2	4034 (-540)
Nsmce1	7306 (-1166)
Nt5c	1573 (+19)
Nudt12	3602 (-52)
Nudt16l1	2998 (-6601)
Nudt19	7014 (+183)
Nudt2	5380 (+3628)
Nudt7	7749 (+1166)
Nufip1	2605 (+28)
Numa1	7198 (-5133)
Numbl	6964 (-2738)
Nup205	6486 (-2801)
Nup93	7674 (-8601)
Nyap1	6352 (-1810), 6351 (+1419)
Oaf	8040 (-8645)
Oard1	3570 (+8478)
Oat	7342 (-1990)
Oaz2	8179 (-4885)
Ogdh	1006 (+7318)
Ogfod1	7673 (+6221)
Ogfod3	1677 (-231)
Ogfr	4905 (-2)
Oit1	2358 (+2138)
Olfr1025-ps1	4511 (-11980968), 4512 (-11966184), 4513 (-11647720), 4514 (-11323792)
Olfr1026	4514 (-11329135)
Olfr1028	4514 (-11356930)
Olfr1029	4514 (-11381078)
Olfr1030	4514 (-11385177)
Olfr1031	4514 (-11397684)
Olfr1367	2051 (+3653)
Olfr1393	1102 (-8634)
Olfr324	1172 (+8057)
Olfr370	7636 (-6156)
Olfr750	2491 (-9741), 2490 (+6755)
Opa3	6927 (-2472), 6928 (+2084)
Optn	4291 (+933), 4290 (+2399)
Orc3	5352 (+79)
Ormdl3	1443 (+6676)
Os9	922 (+9388)
Osbpl11	3129 (+6704)
Osbpl1a	3735 (-7457)
Osbpl9	5570 (+618)
Osgin1	7789 (+1943), 7790 (+3498), 7791 (+3810)
Osr2	2691 (-18)
Ost4	5962 (-1720)
Otop3	1564 (+2786)
Otud7b	5111 (-28)
Otx1	1053 (+3253)
Ovol1	4014 (+1244), 4013 (+1441), 4012 (+6425)
Ovol2	4730 (+1269)
P2ry1	5012 (-1920)
P2ry2	7189 (+6595)
P4hb	1659 (-3611)
Pabpc4	5638 (-246)
Pabpn1	2512 (+951)
Pafah2	5721 (+938)
Pak4	6976 (+308)
Pak6	4620 (-6059), 4621 (-1219)
Pan2	946 (+155)
Pank2	4689 (-412)
Pank3	1081 (-9226), 1082 (+1435)
Papln	1873 (+497)
Papss2	4147 (-8063)
Paqr7	5723 (-6503), 5724 (-4932)
Park7	5858 (-4767)
Parp11	6812 (-6875)
Parp12	6499 (+2410)
Pawr	867 (-2210)
Pax8	4332 (-4752)
Paxbp1	3227 (-54)
Pbld1	676 (-9345), 677 (-652), 678 (+5861)
Pcbd1	666 (-8422)
Pcdh1	3796 (+1725)
Pck1	4880 (-352)
Pcmt1	505 (-443)
Pcmtd1	7 (-7)
Pcnx	1864 (-3151)
Pcsk5	4094 (-2565), 4093 (+965)
Pcyt1a	3118 (-303), 3119 (-205)
Pcyt2	1660 (+813)
Pdcd6	2229 (-331), 2228 (+418), 2227 (+1230)
Pdcl3	43 (-4646)
Pde11a	4524 (-317)
Pde9a	3444 (-6061), 3445 (+3627)
Pdgfa	6361 (+1804)
Pdgfrb	3884 (-2140)
Pdia5	3150 (-125)
Pdik1l	5716 (+2911)
Pdilt	7276 (+886), 7275 (+1498), 7274 (+7081)
Pdk4	6449 (-173)
Pdlim2	2589 (+1243), 2588 (+2644), 2587 (+4026)
Pdp2	7698 (-6676)
Pdxk	746 (+1667), 745 (+4445)
Pdzd11	8447 (-3351)
Pdzd3	8047 (+30)
Peli1	1049 (+9678)
Pepd	7005 (+1734), 7006 (+1846), 7007 (+3367)
Per2	195 (-4281), 194 (+3504)
Perp	534 (-436)
Pex10	5881 (-5549)
Pex11c	7428 (+73)
Pex16	4562 (-420), 4563 (-214), 4564 (+495)
Pex26	6776 (-6387)
Pfkfb4	8327 (+4718)
Pfkp	2037 (+6123), 2036 (+7052)
Pgam2	998 (-5951)
Pgap3	1438 (+5046)
Pgd	5831 (-3968), 5830 (-3802)
Pgpep1	7596 (-6147), 7595 (+191), 7594 (+6278)
Pgpep1l	7073 (-9516)
Pgrmc2	4984 (-9442)
Phf17	4988 (+9337)
Phf5a	2855 (+11)
Phgr1	4622 (-105)
Phkg1	6300 (-64)
Phlpp2	7734 (-2743)
Phospho1	1415 (-2833), 1416 (+2799)
Phyh	4286 (-1072)
Picalm	7151 (+1861)
Pigm	423 (-164)
Pigr	266 (+3417), 267 (+6321)
Pik3c2b	286 (+4934)
Pik3cb	8272 (+2592)
Pik3r1	2303 (+3106), 2302 (+3860)
Pik3r2	7598 (+2745)
Pim1	3432 (-7403), 3433 (-3698), 3434 (-2328)
Pim3	2905 (-7736), 2906 (+5626), 2907 (+5932), 2908 (+6200)
Pink1	5760 (-7179), 5759 (-75)
Pip5k1a	5101 (-572)
Pipox	1307 (-44), 1306 (+248)
Pithd1	5738 (+3557)
Pitpna	1285 (+7615)
Pitx2	5239 (+7480)
Pkdcc	3658 (+7707)
Pkig	4819 (+162)
Pklr	5070 (+349)
Pkn2	5284 (+150)
Pkp2	3042 (-1735)
Pkp3	7379 (+1676)
Pkp4	4463 (+1098)
Pla2g12b	650 (-37)
Pla2g6	2832 (-289), 2831 (+6460)
Plac8	6182 (-2759)
Plbd1	6841 (+334)
Plcb3	4044 (+849)
Plcd1	8365 (+9014), 8364 (+9261)
Pld1	4948 (+1245)
Plec	2793 (-5066), 2792 (+7813), 2791 (+9701)
Plekha2	7487 (-2874)
Plekha7	7258 (-1331), 7257 (-347)
Plekha8	6585 (+4954)
Plekhf1	7019 (+1170), 7018 (+6963)
Plekhg2	6969 (-3185)
Plekhg6	6807 (-216)
Plekhm3	113 (+6265)
Plekhs1	4250 (+137)
Plin1	7092 (-1932)
Plin3	3593 (+76), 3592 (+2564)
Plk3	5602 (-2182)
Pls1	8253 (-649), 8252 (+5655)
Plscr3	1245 (+119)
Plxnb2	2912 (+1229), 2911 (+3103), 2910 (+7342)
Pm20d1	271 (-105)
Pmaip1	3923 (+4307)
Pmf1	5061 (-661)
Pmm1	2858 (-73)
Pmm2	3005 (-7103)
Pnkp	7028 (-2324)
Pnliprp2	4265 (-8015)
Pnma1	1880 (+5619)
Pnp	2487 (+1406)
Pnp2	2488 (+1355)
Pnpla6	7429 (+706)
Pnpo	1426 (+5961)
Podn	5563 (+6592), 5562 (+7089), 5561 (+8813)
Pofut1	4758 (+8438)
Pola2	4021 (+6595)
Polg2	1514 (+1858)
Polm	999 (-9033)
Polr2e	760 (+6750)
Polr2h	3073 (-217)
Pomt2	1899 (-431), 1898 (+73)
Pon2	6448 (+2204)
Por	6325 (+6357)
Ppa1	668 (+8612)
Ppap2a	2338 (+4759)
Ppap2b	5538 (+5543)
Ppap2c	750 (+450)
Ppapdc1b	7489 (-9289)
Ppapdc3	4407 (-1909), 4408 (-1345), 4409 (-1134)
Ppara	2892 (+74)
Ppard	3408 (-2186)
Ppargc1a	6027 (+1562)
Ppcdc	8114 (+8748)
Ppif	2412 (-626)
Ppm1a	1813 (+2184)
Ppp1cb	5976 (+5092)
Ppp1cc	6273 (-2193)
Ppp1r14d	4629 (-63), 4628 (+958)
Ppp1r15b	289 (-6872)
Ppp1r18	3506 (+2052)
Ppp1r9b	1411 (+6862)
Ppp2r3a	8278 (-1493)
Ppp6r3	3979 (+354)
Ppt2	3482 (-72)
Ppy	1488 (+4011)
Pqlc3	1713 (+235)
Prap1	7368 (-78)
Prdm1	628 (+3694)
Prdx1	5593 (-1514), 5594 (+3907)
Preb	5968 (+955)
Prelid1	2180 (+644)
Prep	633 (+4124)
Prkaca	7639 (-557)
Prkag2	5932 (-696)
Prkag3	141 (-5358)
Prkar1b	6363 (-9575)
Prkar2a	8322 (-4678)
Prkca	1527 (-733)
Prkce	3677 (-3926)
Prkcsh	7992 (-8)
Prkcz	5886 (-9684)
Proc	3766 (-1403)
Prom1	6015 (+4284)
Prosc	7497 (-5306)
Proz	7456 (+75)
Prpf38b	5179 (-9241)
Prpf4	5458 (-71)
Prpsap1	1600 (+1192)
Prr15l	1423 (-3631), 1424 (+2124), 1425 (+6061)
Prr24	6917 (-345)
Prr5	2882 (-8567), 2883 (-5504)
Prrxl1	2447 (-8873)
Prss12	5225 (+708)
Prss22	3367 (-2687), 3366 (+8880)
Prss27	3368 (-437)
Prss30	3365 (-7856), 3364 (-1680), 3363 (+58)
Prss32	3362 (-2520)
Psd4	4330 (-6386)
Psmg3	6377 (+4534)
Pstpip2	3962 (+47)
Ptafr	5684 (+1315)
Ptbp1	755 (+287)
Ptgfrn	5136 (-2093)
Ptgr1	5449 (-7805)
Ptk2b	2570 (+662), 2569 (+9113)
Ptk6	4909 (+5733)
Ptplb	3148 (+269)
Ptpn6	6793 (-37)
Ptprg	2362 (-549)
Ptprh	6899 (-5177), 6898 (-2223), 6897 (-1219), 6896 (-26)
Pttg1ip	729 (+235), 730 (+471)
Pvrl1	8043 (-1682)
Pvrl2	6937 (-511), 6936 (+1263), 6935 (+2146)
Pvrl3	3173 (+465), 3172 (+866)
Pxdc1	2083 (-2818), 2082 (-278), 2081 (+1425)
Pxk	2355 (-4555)
Pycrl	2785 (+1248)
Qprt	7318 (+596), 7317 (+8254)
R3hcc1	2582 (+3574)
R3hcc1l	4184 (+285)
R3hdm2	925 (+4892)
Rab11b	3462 (+163)
Rab17	189 (+241), 188 (+2450)
Rab20	7448 (+1466), 7447 (+5335)
Rab30	7153 (+202)
Rab31	3612 (-5114), 3611 (-1854)
Rab4a	7836 (-8943), 7837 (+9882)
Rab6a	7187 (+5317)
Rab8a	7610 (+890), 7611 (+8854)
Rabep1	1257 (-1569), 1258 (+618)
Rabgap1l	371 (+674)
Rad51	4624 (-291)
Rad54l2	8300 (-1841), 8299 (+12)
Ralgds	4379 (-403)
Ralgps1	4425 (+1859), 4424 (+7364), 4423 (+9957)
Ranbp1	3060 (+29)
Ranbp3	3596 (-4326)
Rap1a	5162 (+347)
Rap2b	5014 (-2274)
Rapgef1	4383 (+3665)
Rapgefl1	1446 (+2793)
Rara	1448 (-9368), 1449 (-2476)
Rars2	5353 (+1387)
Rasa2	8257 (-6921), 8256 (-3748)
Rasa4	6332 (+1188)
Rassf3	901 (+350)
Rassf7	7381 (+547), 7382 (+779)
Rbbp5	284 (+116)
Rbck1	4749 (-2527)
Rbks	5971 (-37)
Rbm14	4003 (-9161), 4002 (-5706)
Rbm47	6086 (+349), 6085 (+3941), 6084 (+5704)
Rbm48	5906 (+194)
Rbm6	8310 (-3517)
Rbp1	8268 (+119)
Rbp2	8271 (-52)
Rcbtb1	2538 (-468)
Rcc1	5679 (-672)
Rdh11	1850 (+39)
Rdh5	955 (+71)
Rdh7	938 (-52), 937 (+2080)
Rec8	2516 (-4364), 2517 (+52)
Reep3	686 (+8829)
Reep6	772 (+1963), 773 (+2191)
Reg3b	6633 (-8502)
Relb	6931 (+5729)
Rell1	6054 (+4138)
Rer1	5882 (+2657)
Rexo4	4361 (+7134)
Rfng	1664 (+2697)
Rfx4	815 (+7812)
Rgs12	5984 (-435), 5985 (-210)
Rgs3	5464 (-1408)
Rhbg	5058 (-3028)
Rhebl1	2945 (-2370), 2944 (+754)
Rhoc	5160 (+7566)
Rhog	7200 (+3780)
Rhov	4631 (+797)
Rhpn2	7011 (+1057)
Rilp	1282 (-314)
Ripk2	5346 (+1639)
Ripk4	3274 (+8312)
Rnase1	2493 (-2529)
Rnase10	2489 (-9666)
Rnd1	2940 (+142)
Rnd3	4452 (+9804)
Rnf103	6624 (-182)
Rnf11	5571 (-225)
Rnf114	4851 (+230), 4852 (+1073)
Rnf125	3752 (-2637)
Rnf13	5006 (-511)
Rnf130	1103 (-3031)
Rnf141	7226 (-7571)
Rnf152	224 (-6229)
Rnf181	6628 (-2847)
Rnf183	5459 (+4342)
Rnf185	977 (-6197)
Rnf186	5766 (-1105)
Rnf19a	2694 (-4234), 2693 (+569)
Rnf213	1637 (-6609), 1638 (-835)
Rnf32	5950 (+4084)
Rnf44	2173 (-6483)
Rnf5	3481 (-575)
Rnft1	1364 (+1085)
Rnpc3	5185 (-9602)
Rnpepl1	201 (+743), 202 (+9519)
Rock2	1710 (-708), 1711 (+9677)
Rogdi	3000 (+3389), 2999 (+4613)
Ror2	2165 (-142)
Rorc	5092 (-5093), 5093 (-4296), 5094 (+62), 5095 (+2047)
Rpl7	18 (-418)
Rps16	6968 (+7194)
Rps26-ps1	7730 (-9736)
Rps27l	8189 (-3295)
Rps29	1803 (-160)
Rps3a1	5048 (+47)
Rps6ka1	5710 (-7750), 5709 (+5778), 5708 (+7883), 5707 (+8437)
Rps7	1728 (-2917)
Rqcd1	139 (+7212)
Rras2	7246 (-653)
Rreb1	2101 (-1576), 2102 (-98)
Rrp12	4181 (+7738)
Rsad1	1406 (-4195)
Rsbn1l	5919 (+4634)
Rtf1	4636 (-5774)
Rtkn	6635 (-4151)
Rtn4rl2	4541 (-8994)
Rwdd2a	8236 (+1146)
Rwdd2b	3218 (-5131), 3217 (+103)
Rxra	4372 (-5418), 4373 (-1051), 4374 (+9323)
Saa1	7050 (+4212)
Saa3	7049 (-8382)
Sac3d1	4025 (-3383)
Samd10	4912 (+431)
Samd9l	6444 (+3395), 6443 (+9356)
Samhd1	4780 (+7691)
Sap30	7561 (-2167)
Sap30bp	1586 (-7949)
Sap30l	1165 (-1058), 1166 (-211), 1167 (+7889)
Sapcd1	3489 (+4089)
Sar1b	1112 (+2491), 1113 (+4346), 1114 (+4696)
Sardh	4363 (-1262), 4362 (+9642)
Satb2	78 (+2205)
Sbf2	7223 (-1065)
Sbk1	7308 (+3160)
Sbno2	764 (+3881)
Sc4mol	7575 (-4481)
Sc5d	8037 (+3531)
Scaf4	3225 (+836)
Scamp2	8118 (+812)
Scamp5	8116 (+568), 8115 (+4933)
Scarb2	6143 (-6650)
Sccpdh	440 (-3776)
Scd2	4197 (+2247)
Scgb1b30	7001 (-8274)
Scoc	7635 (+1058)
Scpep1	1383 (+16)
Scrn2	1427 (+5)
Sct	7384 (+1056)
Sdc1	1704 (-866), 1705 (-214)
Sdc4	4822 (+5283)
Sdcbp2	4742 (+6675), 4743 (+8574)
Sdhc	411 (+90)
Sec13	6735 (+3241)
Sec14l2	984 (+5643)
Sec14l4	983 (+3912)
Sec16a	4352 (-914)
Sec22b	5131 (+2445)
Sec22c	8385 (+49)
Sec23a	1797 (+575), 1796 (+6366)
Sec24a	1111 (+870), 1110 (+9892)
Sec24c	2390 (-413)
Sec24d	5224 (+1614)
Sectm1a	1674 (-9183), 1673 (-6513), 1672 (-5347)
Sectm1b	1671 (+5181), 1670 (+6834)
Seh1l	3932 (-275)
Selenbp1	5099 (+32)
Selm	979 (-4915)
Sema3b	8306 (-3379)
Sema4a	5064 (+572), 5063 (+7065)
[truncated: 626 more rows]
