# Supplementary material for: Microbiota regulate intestinal epithelial gene expression by suppressing the transcription factor Hepatocyte nuclear factor 4 alpha
Source: Genome Res. 2017 Jul;27(7):1195–206. doi: 10.1101/gr.220111.116 (PMC5495071; doi:10.1101/gr.220111.116)
Supplement: Supplemental Material [file supp_gr.220111.116_Supplemental_Table_S8.xlsx]

## Sheet: GF H3K27ac regions
Supplemental Table S8: GF H3K27ac sites (related to Fig. 3)
GF H3K27ac regions
chrX	45459619	45460619
chrX	45459819	45460819
chrX	45461819	45462819
chrX	45462819	45463819
chrX	103382158	103383158
chrX	103382357	103383357
chrX	103382556	103383556
chrX	160581200	160582200
chr13	4058740	4059740
chr13	4190197	4191197
chr13	4190385	4191385
chr13	4190573	4191573
chr13	4190761	4191761
chr13	4191137	4192137
chr13	4232607	4233607
chr13	4232807	4233807
chr13	4233007	4234007
chr13	4233207	4234207
chr13	4233407	4234407
chr13	4233607	4234607
chr13	4233807	4234807
chr13	4234007	4235007
chr13	4263155	4264155
chr13	4263355	4264355
chr13	4263555	4264555
chr13	4263755	4264755
chr13	4264394	4265394
chr13	4264585	4265585
chr13	4264776	4265776
chr13	4352928	4353928
chr13	4353410	4354410
chr13	4353590	4354590
chr13	4353770	4354770
chr13	4353950	4354950
chr13	4359988	4360988
chr13	4360168	4361168
chr13	6105971	6106971
chr13	6106171	6107171
chr13	35304987	35305987
chr13	43880254	43881254
chr13	73835154	73836154
chr13	73835554	73836554
chr13	73835754	73836754
chr13	73835954	73836954
chr13	73836154	73837154
chr13	73836354	73837354
chr13	73836554	73837554
chr13	73836754	73837754
chr13	73836954	73837954
chr13	73844916	73845916
chr13	73845633	73846633
chr13	73845833	73846833
chr13	73848033	73849033
chr13	73848633	73849633
chr13	73849433	73850433
chr13	73849833	73850833
chr13	73850033	73851033
chr13	92114077	92115077
chr13	92115877	92116877
chr13	92116077	92117077
chr13	100123126	100124126
chr13	112842131	112843131
chr12	5290571	5291571
chr12	17272993	17273993
chr12	17273193	17274193
chr12	17498491	17499491
chr12	17498691	17499691
chr12	17500091	17501091
chr12	25802562	25803562
chr12	25802946	25803946
chr12	27162363	27163363
chr12	27770131	27771131
chr12	27770322	27771322
chr12	70475480	70476480
chr12	78298475	78299475
chr12	78298675	78299675
chr12	78299275	78300275
chr12	78299475	78300475
chr12	80141298	80142298
chr12	80141498	80142498
chr12	82608440	82609440
chr12	82608640	82609640
chr12	87086487	87087487
chr12	87086681	87087681
chr12	87086875	87087875
chr12	87087069	87088069
chr12	88287973	88288973
chr12	88288173	88289173
chr12	88288373	88289373
chr12	88288573	88289573
chr12	88288773	88289773
chr12	88288973	88289973
chr12	88296762	88297762
chr12	103963182	103964182
chr12	103963382	103964382
chr12	112508085	112509085
chr12	112508285	112509285
chr12	114385496	114386496
chr12	114387496	114388496
chr12	114388296	114389296
chr12	114391096	114392096
chr12	114391296	114392296
chr12	114391496	114392496
chr12	114391696	114392696
chr12	114391896	114392896
chr12	114392096	114393096
chr12	114392296	114393296
chr12	114392496	114393496
chr11	20232632	20233632
chr11	29670646	29671646
chr11	29670843	29671843
chr11	29671040	29672040
chr11	45681043	45682043
chr11	45681243	45682243
chr11	49075327	49076327
chr11	50138399	50139399
chr11	51570450	51571450
chr11	54600040	54601040
chr11	54624631	54625631
chr11	54624831	54625831
chr11	54625031	54626031
chr11	54757493	54758493
chr11	54757693	54758693
chr11	57583411	57584411
chr11	61081900	61082900
chr11	61082100	61083100
chr11	61082700	61083700
chr11	61082900	61083900
chr11	61133031	61134031
chr11	61164627	61165627
chr11	61164827	61165827
chr11	61165627	61166627
chr11	61167227	61168227
chr11	61190411	61191411
chr11	61190611	61191611
chr11	61190811	61191811
chr11	61191011	61192011
chr11	61191211	61192211
chr11	61191611	61192611
chr11	61191811	61192811
chr11	61192011	61193011
chr11	61192211	61193211
chr11	61192411	61193411
chr11	61192811	61193811
chr11	62944650	62945650
chr11	62944850	62945850
chr11	62945050	62946050
chr11	62945250	62946250
chr11	62945450	62946450
chr11	62945650	62946650
chr11	62945850	62946850
chr11	62946050	62947050
chr11	62946250	62947250
chr11	62946450	62947450
chr11	62946650	62947650
chr11	62947050	62948050
chr11	62947250	62948250
chr11	62947450	62948450
chr11	62947650	62948650
chr11	62947850	62948850
chr11	62948050	62949050
chr11	66785835	66786835
chr11	66786035	66787035
chr11	66786235	66787235
chr11	66786435	66787435
chr11	66787035	66788035
chr11	76819360	76820360
chr11	76819560	76820560
chr11	76819760	76820760
chr11	78232388	78233388
chr11	78232588	78233588
chr11	78232788	78233788
chr11	78232988	78233988
chr11	78233188	78234188
chr11	78233388	78234388
chr11	78233588	78234588
chr11	78233788	78234788
chr11	78233988	78234988
chr11	78234188	78235188
chr11	78234388	78235388
chr11	78234588	78235588
chr11	78234788	78235788
chr11	78234988	78235988
chr11	78246658	78247658
chr11	78247658	78248658
chr11	78247858	78248858
chr11	78248058	78249058
chr11	78248858	78249858
chr11	78249658	78250658
chr11	78249858	78250858
chr11	78251058	78252058
chr11	78251929	78252929
chr11	78252523	78253523
chr11	86233172	86234172
chr11	87407278	87408278
chr11	90250946	90251946
chr11	90251128	90252128
chr11	94072545	94073545
chr11	94072745	94073745
chr11	98608610	98609610
chr11	98608810	98609810
chr11	98609010	98610010
chr11	98610410	98611410
chr11	100002890	100003890
chr11	100003090	100004090
chr11	100004890	100005890
chr11	100006290	100007290
chr11	100006490	100007490
chr11	100006690	100007690
chr11	100007490	100008490
chr11	100008090	100009090
chr11	100008890	100009890
chr11	100009090	100010090
chr11	100025622	100026622
chr11	100025822	100026822
chr11	100026022	100027022
chr11	100028622	100029622
chr11	100028822	100029822
chr11	100029222	100030222
chr11	100029422	100030422
chr11	100029622	100030622
chr11	100029822	100030822
chr11	100181028	100182028
chr11	100272905	100273905
chr11	100273095	100274095
chr11	100273285	100274285
chr11	101529292	101530292
chr11	101529492	101530492
chr11	101529692	101530692
chr11	101530492	101531492
chr11	103216688	103217688
chr11	103216888	103217888
chr11	114945213	114946213
chr11	115023389	115024389
chr11	115027599	115028599
chr11	115309435	115310435
chr11	115323576	115324576
chr11	116714210	116715210
chr11	116714410	116715410
chr11	117796680	117797680
chr11	117796880	117797880
chr11	117797080	117798080
chr11	117797680	117798680
chr11	118268974	118269974
chr11	118840252	118841252
chr11	118846376	118847376
chr11	118850376	118851376
chr11	120209629	120210629
chr11	120209829	120210829
chr10	21185541	21186541
chr10	21185737	21186737
chr10	21212670	21213670
chr10	21232274	21233274
chr10	21232439	21233439
chr10	21271005	21272005
chr10	21271205	21272205
chr10	21271405	21272405
chr10	21272405	21273405
chr10	21273205	21274205
chr10	21273405	21274405
chr10	21273605	21274605
chr10	21710979	21711979
chr10	21711179	21712179
chr10	21711579	21712579
chr10	21711779	21712779
chr10	21711979	21712979
chr10	21712179	21713179
chr10	21712379	21713379
chr10	21712579	21713579
chr10	21712779	21713779
chr10	21712979	21713979
chr10	21713179	21714179
chr10	21713379	21714379
chr10	21714779	21715779
chr10	21714979	21715979
chr10	21715179	21716179
chr10	21715379	21716379
chr10	21715579	21716579
chr10	21715779	21716779
chr10	21715979	21716979
chr10	21716179	21717179
chr10	21716379	21717379
chr10	21716579	21717579
chr10	21716779	21717779
chr10	21716979	21717979
chr10	21717179	21718179
chr10	21717379	21718379
chr10	21717579	21718579
chr10	21717779	21718779
chr10	21717979	21718979
chr10	21718179	21719179
chr10	21718379	21719379
chr10	21718579	21719579
chr10	21718779	21719779
chr10	21723471	21724471
chr10	21723671	21724671
chr10	21723871	21724871
chr10	21724471	21725471
chr10	21724671	21725671
chr10	21724871	21725871
chr10	21725071	21726071
chr10	40047163	40048163
chr10	40047951	40048951
chr10	40048148	40049148
chr10	68675002	68676002
chr10	68675199	68676199
chr10	75026712	75027712
chr10	78994231	78995231
chr10	78994431	78995431
chr10	79608495	79609495
chr10	79608695	79609695
chr10	79609495	79610495
chr10	79609695	79610695
chr10	79609895	79610895
chr10	80447637	80448637
chr10	80447835	80448835
chr10	81007780	81008780
chr10	81022258	81023258
chr10	81022458	81023458
chr10	81022658	81023658
chr10	81022858	81023858
chr10	81023058	81024058
chr10	81023258	81024258
chr10	81025458	81026458
chr10	82581046	82582046
chr10	82581246	82582246
chr10	82581446	82582446
chr10	82581646	82582646
chr10	82581846	82582846
chr10	82582046	82583046
chr10	82582246	82583246
chr10	82583691	82584691
chr10	82586746	82587746
chr10	82586946	82587946
chr10	86167510	86168510
chr10	93103566	93104566
chr10	93104166	93105166
chr10	93104366	93105366
chr10	93104566	93105566
chr10	110943284	110944284
chr10	110943473	110944473
chr10	122526639	122527639
chr10	126590014	126591014
chr10	126590214	126591214
chr10	126590614	126591614
chr10	126595814	126596814
chr10	126596214	126597214
chr10	126601063	126602063
chr10	126601263	126602263
chr10	126601463	126602463
chr10	126602863	126603863
chr10	126603463	126604463
chr10	126603663	126604663
chr10	127102110	127103110
chr10	127102310	127103310
chr10	127324010	127325010
chr17	7016640	7017640
chr17	7031470	7032470
chr17	23896259	23897259
chr17	23896459	23897459
chr17	23896659	23897659
chr17	23896859	23897859
chr17	23897059	23898059
chr17	23897259	23898259
chr17	23897459	23898459
chr17	23897659	23898659
chr17	28622088	28623088
chr17	28622266	28623266
chr17	28622444	28623444
chr17	28648161	28649161
chr17	28648561	28649561
chr17	28648761	28649761
chr17	28648961	28649961
chr17	28649761	28650761
chr17	28649961	28650961
chr17	28650161	28651161
chr17	28650361	28651361
chr17	28651754	28652754
chr17	28651954	28652954
chr17	28652154	28653154
chr17	28652754	28653754
chr17	28652954	28653954
chr17	28653154	28654154
chr17	28653354	28654354
chr17	28653554	28654554
chr17	28653754	28654754
chr17	28653954	28654954
chr17	28654154	28655154
chr17	28654354	28655354
chr17	28654554	28655554
chr17	28654754	28655754
chr17	28654954	28655954
chr17	28655154	28656154
chr17	28655354	28656354
chr17	28655554	28656554
chr17	28657540	28658540
chr17	28657740	28658740
chr17	28657940	28658940
chr17	28658540	28659540
chr17	28658740	28659740
chr17	28658940	28659940
chr17	28659140	28660140
chr17	28659340	28660340
chr17	28659540	28660540
chr17	28659740	28660740
chr17	28659940	28660940
chr17	28660140	28661140
chr17	31270817	31271817
chr17	32245641	32246641
chr17	32245832	32246832
chr17	33883505	33884505
chr17	33917580	33918580
chr17	36002653	36003653
chr17	43251131	43252131
chr17	43314156	43315156
chr17	43314336	43315336
chr17	43579518	43580518
chr17	43587642	43588642
chr17	45835909	45836909
chr17	45836109	45837109
chr17	49507241	49508241
chr17	49507408	49508408
chr17	49508181	49509181
chr17	49508377	49509377
chr16	5134034	5135034
chr16	5134834	5135834
chr16	5135034	5136034
chr16	5135234	5136234
chr16	10754429	10755429
chr16	10754629	10755629
chr16	10755029	10756029
chr16	10755229	10756229
chr16	17131545	17132545
chr16	17131730	17132730
chr16	17131915	17132915
chr16	18626775	18627775
chr16	18626975	18627975
chr16	18627175	18628175
chr16	18627375	18628375
chr16	18627575	18628575
chr16	18627775	18628775
chr16	18627975	18628975
chr16	18628175	18629175
chr16	18628375	18629375
chr16	18628575	18629575
chr16	18628775	18629775
chr16	18628975	18629975
chr16	18629175	18630175
chr16	18629775	18630775
chr16	18629975	18630975
chr16	18630175	18631175
chr16	18630375	18631375
chr16	18630575	18631575
chr16	18630775	18631775
chr16	18630975	18631975
chr16	18631775	18632775
chr16	18631975	18632975
chr16	18632175	18633175
chr16	18636667	18637667
chr16	22857653	22858653
chr16	22857853	22858853
chr16	24392942	24393942
chr16	30775171	30776171
chr16	30775756	30776756
chr16	30775951	30776951
chr16	30776146	30777146
chr16	30776341	30777341
chr16	39754468	39755468
chr16	39754668	39755668
chr16	62851041	62852041
chr16	62853651	62854651
chr16	62853846	62854846
chr16	62854041	62855041
chr16	90211157	90212157
chr16	90211357	90212357
chr16	90211557	90212557
chr16	97696284	97697284
chr15	58227247	58228247
chr15	58233985	58234985
chr15	58234185	58235185
chr15	58236671	58237671
chr15	58236871	58237871
chr15	59241674	59242674
chr15	59373428	59374428
chr15	66799641	66800641
chr15	66800041	66801041
chr15	66800241	66801241
chr15	66800441	66801441
chr15	66891901	66892901
chr15	79113943	79114943
chr15	79115743	79116743
chr15	79115943	79116943
chr15	79989620	79990620
chr15	81640993	81641993
chr15	81641193	81642193
chr15	81641393	81642393
chr15	81641593	81642593
chr15	81641793	81642793
chr15	82209916	82210916
chr15	85036312	85037312
chr15	85036512	85037512
chr15	85564500	85565500
chr15	85565900	85566900
chr15	85566300	85567300
chr15	85566500	85567500
chr15	89228006	89229006
chr15	89228206	89229206
chr15	89228806	89229806
chr15	89229006	89230006
chr15	89229206	89230206
chr15	89229406	89230406
chr15	95622896	95623896
chr15	95623896	95624896
chr15	95624096	95625096
chr15	96528998	96529998
chr15	98439405	98440405
chr15	98439605	98440605
chr15	98859519	98860519
chr15	99548957	99549957
chr15	101007163	101008163
chr15	101832098	101833098
chr15	101834898	101835898
chr15	101835098	101836098
chr15	101845840	101846840
chr14	8640317	8641317
chr14	8849022	8850022
chr14	8849222	8850222
chr14	15376874	15377874
chr14	15377074	15378074
chr14	22318681	22319681
chr14	22318881	22319881
chr14	35087191	35088191
chr14	35087391	35088391
chr14	35087591	35088591
chr14	35087791	35088791
chr14	35088391	35089391
chr14	35116027	35117027
chr14	35116227	35117227
chr14	35124196	35125196
chr14	35124396	35125396
chr14	35124596	35125596
chr14	35124796	35125796
chr14	35124996	35125996
chr14	35125196	35126196
chr14	35125596	35126596
chr14	35125796	35126796
chr14	35125996	35126996
chr14	35175346	35176346
chr14	35175546	35176546
chr14	35175746	35176746
chr14	35175946	35176946
chr14	35176146	35177146
chr14	35176346	35177346
chr14	35176546	35177546
chr14	35176746	35177746
chr14	35176946	35177946
chr14	35397181	35398181
chr14	66757795	66758795
chr14	66758595	66759595
chr14	66758795	66759795
chr14	66758995	66759995
chr14	68446328	68447328
chr14	69923061	69924061
chr14	70418015	70419015
chr14	121898439	121899439
chr14	121898639	121899639
chr14	121898839	121899839
chr14	121899039	121900039
chr14	121899639	121900639
chr14	121899839	121900839
chr14	121900039	121901039
chr14	121900239	121901239
chr14	121900439	121901439
chr14	121900639	121901639
chr14	121900839	121901839
chr14	121901039	121902039
chr14	121901239	121902239
chr14	121904239	121905239
chr14	121904439	121905439
chr14	121904639	121905639
chr14	121904839	121905839
chr14	121905039	121906039
chr14	121905639	121906639
chr14	121951386	121952386
chr14	121951586	121952586
chr14	121952186	121953186
chr14	121952386	121953386
chr14	121953561	121954561
chr14	121953761	121954761
chr14	121953961	121954961
chr14	121962566	121963566
chr14	121963166	121964166
chr14	121963366	121964366
chr14	121963566	121964566
chr14	121964166	121965166
chr14	121964366	121965366
chr14	121964566	121965566
chr14	121967153	121968153
chr14	121967353	121968353
chr14	121967553	121968553
chr14	121968153	121969153
chr14	121968353	121969353
chr19	6046323	6047323
chr19	6660749	6661749
chr19	6661749	6662749
chr19	6662349	6663349
chr19	6662549	6663549
chr19	6662749	6663749
chr19	6662949	6663949
chr19	6663149	6664149
chr19	7054275	7055275
chr19	9063946	9064946
chr19	20626057	20627057
chr19	29064624	29065624
chr19	30297392	30298392
chr19	38409528	38410528
chr19	38409728	38410728
chr19	38409928	38410928
chr19	38410128	38411128
chr19	38410328	38411328
chr19	38411728	38412728
chr19	38411928	38412928
chr19	38412128	38413128
chr19	38413728	38414728
chr19	38413928	38414928
chr19	38424494	38425494
chr19	38424694	38425694
chr19	38446026	38447026
chr19	38446226	38447226
chr19	38471576	38472576
chr19	38473376	38474376
chr19	39336516	39337516
chr19	39361558	39362558
chr19	40573786	40574786
chr19	41986464	41987464
chr19	41986662	41987662
chr19	43991165	43992165
chr19	43991365	43992365
chr19	43992365	43993365
chr19	44142732	44143732
chr19	46540040	46541040
chr19	55321450	55322450
chr19	55326224	55327224
chr19	55326424	55327424
chr19	55326624	55327624
chr19	55328024	55329024
chr19	55330424	55331424
chr19	55330624	55331624
chr19	55330824	55331824
chr19	55331024	55332024
chr19	55331224	55332224
chr19	55333524	55334524
chr19	55333724	55334724
chr19	55333924	55334924
chr19	55334124	55335124
chr19	57441798	57442798
chr19	58826341	58827341
chr18	3666106	3667106
chr18	3666306	3667306
chr18	3666506	3667506
chr18	3666706	3667706
chr18	4736664	4737664
chr18	4737464	4738464
chr18	7594328	7595328
chr18	8934938	8935938
chr18	35020529	35021529
chr18	35785777	35786777
chr18	35785976	35786976
chr18	35786175	35787175
chr18	47527312	47528312
chr18	50287497	50288497
chr18	50287697	50288697
chr18	50287897	50288897
chr18	66630186	66631186
chr18	66630386	66631386
chr18	66630586	66631586
chr18	74938184	74939184
chr18	74938382	74939382
chr18	74938778	74939778
chr18	74938976	74939976
chr18	82171560	82172560
chr18	82172160	82173160
chr7	16920855	16921855
chr7	16985836	16986836
chr7	26682291	26683291
chr7	26682491	26683491
chr7	31004948	31005948
chr7	31005131	31006131
chr7	39010710	39011710
chr7	39010909	39011909
chr7	39011705	39012705
chr7	39012103	39013103
chr7	39012302	39013302
chr7	50698624	50699624
chr7	52823510	52824510
chr7	52959232	52960232
chr7	52959432	52960432
chr7	52960032	52961032
chr7	52960232	52961232
chr7	52960432	52961432
chr7	52960632	52961632
chr7	52960832	52961832
chr7	52961032	52962032
chr7	52961232	52962232
chr7	52961432	52962432
chr7	52961632	52962632
chr7	52962232	52963232
chr7	52962432	52963432
chr7	53013482	53014482
chr7	53013682	53014682
chr7	59265731	59266731
chr7	71040887	71041887
chr7	71041087	71042087
chr7	71041287	71042287
chr7	71041487	71042487
chr7	71041687	71042687
chr7	71041887	71042887
chr7	71042087	71043087
chr7	71042287	71043287
chr7	71082586	71083586
chr7	75417671	75418671
chr7	75417871	75418871
chr7	86981383	86982383
chr7	86981583	86982583
chr7	86981783	86982783
chr7	88255350	88256350
chr7	88255550	88256550
chr7	88255750	88256750
chr7	88255950	88256950
chr7	88256150	88257150
chr7	88257350	88258350
chr7	88257550	88258550
chr7	88258950	88259950
chr7	88259350	88260350
chr7	88259550	88260550
chr7	88259750	88260750
chr7	88259950	88260950
chr7	88260150	88261150
chr7	88260350	88261350
chr7	88261350	88262350
chr7	88261750	88262750
chr7	88261950	88262950
chr7	88262750	88263750
chr7	91188760	91189760
chr7	91189360	91190360
chr7	104478732	104479732
chr7	104479132	104480132
chr7	104479932	104480932
chr7	104480532	104481532
chr7	117266229	117267229
chr7	134169213	134170213
chr7	134569957	134570957
chr7	134570157	134571157
chr7	146486284	146487284
chr7	146487484	146488484
chr7	146488084	146489084
chr7	146488284	146489284
chr7	146662174	146663174
chr7	146662374	146663374
chr6	23888934	23889934
chr6	23889127	23890127
chr6	24215752	24216752
chr6	24215952	24216952
chr6	24216952	24217952
chr6	24217152	24218152
chr6	24217752	24218752
chr6	24217952	24218952
chr6	24219463	24220463
chr6	24219653	24220653
chr6	24219843	24220843
chr6	24258999	24259999
chr6	24259199	24260199
chr6	24260599	24261599
chr6	24272345	24273345
chr6	30754348	30755348
chr6	30754516	30755516
chr6	42299878	42300878
chr6	42320270	42321270
chr6	42320469	42321469
chr6	42320668	42321668
chr6	42321663	42322663
chr6	47762430	47763430
chr6	47762630	47763630
chr6	50190577	50191577
chr6	50210099	50211099
chr6	50210299	50211299
chr6	50210899	50211899
chr6	50211099	50212099
chr6	50307375	50308375
chr6	50307575	50308575
chr6	50308775	50309775
chr6	50308975	50309975
chr6	50312596	50313596
chr6	50312796	50313796
chr6	50314796	50315796
chr6	50324836	50325836
chr6	50325036	50326036
chr6	50325236	50326236
chr6	50325436	50326436
chr6	50327836	50328836
chr6	51157711	51158711
chr6	54211280	54212280
chr6	54278225	54279225
chr6	54278425	54279425
chr6	54278825	54279825
chr6	54279025	54280025
chr6	55189195	55190195
chr6	55189395	55190395
chr6	55286055	55287055
chr6	55286255	55287255
chr6	55286455	55287455
chr6	55286655	55287655
chr6	55286855	55287855
chr6	55287055	55288055
chr6	55287255	55288255
chr6	55288255	55289255
chr6	72523643	72524643
chr6	83053042	83054042
chr6	83053242	83054242
chr6	85036779	85037779
chr6	85770232	85771232
chr6	85770432	85771432
chr6	86702977	86703977
chr6	86703177	86704177
chr6	86703377	86704377
chr6	86705177	86706177
chr6	86705377	86706377
chr6	86710377	86711377
chr6	86710577	86711577
chr6	86713177	86714177
chr6	86714577	86715577
chr6	86718377	86719377
chr6	86720377	86721377
chr6	86720577	86721577
chr6	86720777	86721777
chr6	86720977	86721977
chr6	86721177	86722177
chr6	86721377	86722377
chr6	86722577	86723577
chr6	86722777	86723777
chr6	86722977	86723977
chr6	86723177	86724177
chr6	90400046	90401046
chr6	90400246	90401246
chr6	90400646	90401646
chr6	90400846	90401846
chr6	90412198	90413198
chr6	90412398	90413398
chr6	90412598	90413598
chr6	90412798	90413798
chr6	90412998	90413998
chr6	90413398	90414398
chr6	90425068	90426068
chr6	90425268	90426268
chr6	90425868	90426868
chr6	90441819	90442819
chr6	90442002	90443002
chr6	90442185	90443185
chr6	90442368	90443368
chr6	90442551	90443551
chr6	90499909	90500909
chr6	91524250	91525250
chr6	91524450	91525450
chr6	91635189	91636189
chr6	91635789	91636789
chr6	91635989	91636989
chr6	94115896	94116896
chr6	124706068	124707068
chr6	124706268	124707268
chr6	125114850	125115850
chr6	125115050	125116050
chr6	125299396	125300396
chr6	125299596	125300596
chr5	3546371	3547371
chr5	3546571	3547571
chr5	8621792	8622792
chr5	8621977	8622977
chr5	8622162	8623162
chr5	9108477	9109477
chr5	31271336	31272336
chr5	33079930	33080930
chr5	33087330	33088330
chr5	33087530	33088530
chr5	33087930	33088930
chr5	33088130	33089130
chr5	38881157	38882157
chr5	38881357	38882357
chr5	38888654	38889654
chr5	53604519	53605519
chr5	64960568	64961568
chr5	64960742	64961742
chr5	64970819	64971819
chr5	75098904	75099904
chr5	100060936	100061936
chr5	100467227	100468227
chr5	107701167	107702167
chr5	107724854	107725854
chr5	113600559	113601559
chr5	114904049	114905049
chr5	114904210	114905210
chr5	114904371	114905371
chr5	115608224	115609224
chr5	129599324	129600324
chr5	129599524	129600524
chr5	129602125	129603125
chr5	129602316	129603316
chr5	129602507	129603507
chr5	136150454	136151454
chr5	136150654	136151654
chr5	136157531	136158531
chr5	136158131	136159131
chr5	136158331	136159331
chr5	136158531	136159531
chr5	136218765	136219765
chr5	136218965	136219965
chr5	136219165	136220165
chr5	136230770	136231770
chr5	136231571	136232571
chr5	136252336	136253336
chr5	136252536	136253536
chr5	136253336	136254336
chr5	136258030	136259030
chr5	136258230	136259230
chr5	136261430	136262430
chr5	136261630	136262630
chr5	136311105	136312105
chr5	137640537	137641537
chr5	137640737	137641737
chr5	137640937	137641937
chr5	137641537	137642537
chr5	137641737	137642737
chr5	137642537	137643537
chr5	139469465	139470465
chr5	139761003	139762003
chr5	139761203	139762203
chr5	140593250	140594250
chr5	143578693	143579693
chr5	147887947	147888947
chr4	41040753	41041753
chr4	41040953	41041953
chr4	41041153	41042153
chr4	41041753	41042753
chr4	41041953	41042953
chr4	41042153	41043153
chr4	41042353	41043353
chr4	41042553	41043553
chr4	41042753	41043753
chr4	41043153	41044153
chr4	41043353	41044353
chr4	41043553	41044553
chr4	41043753	41044753
chr4	41043953	41044953
chr4	41044153	41045153
chr4	41044353	41045353
chr4	41044553	41045553
chr4	43393769	43394769
chr4	43393951	43394951
chr4	43394133	43395133
chr4	46566893	46567893
chr4	46567093	46568093
chr4	46589225	46590225
chr4	46611425	46612425
chr4	46612425	46613425
chr4	46612625	46613625
chr4	46612825	46613825
chr4	46613025	46614025
chr4	49519197	49520197
chr4	71784148	71785148
chr4	71859318	71860318
chr4	71859518	71860518
chr4	71859918	71860918
chr4	71860118	71861118
chr4	71860318	71861318
chr4	71860518	71861518
chr4	71860718	71861718
chr4	71860918	71861918
chr4	71861118	71862118
chr4	88579433	88580433
chr4	88579633	88580633
chr4	106219015	106220015
chr4	106219215	106220215
chr4	111124896	111125896
chr4	111125096	111126096
chr4	115317922	115318922
chr4	115318122	115319122
chr4	115318322	115319322
chr4	115318522	115319522
chr4	115318722	115319722
chr4	115318922	115319922
chr4	115319122	115320122
chr4	115319322	115320322
chr4	115319522	115320522
chr4	115319722	115320722
chr4	115691288	115692288
chr4	115691488	115692488
chr4	118101166	118102166
chr4	118101366	118102366
chr4	119331436	119332436
chr4	119332436	119333436
chr4	119337993	119338993
chr4	119338193	119339193
chr4	119338793	119339793
chr4	123443981	123444981
chr4	123444181	123445181
chr4	123444381	123445381
chr4	123444581	123445581
chr4	123444781	123445781
chr4	123444981	123445981
chr4	123445181	123446181
chr4	123445381	123446381
chr4	125090113	125091113
chr4	125090287	125091287
chr4	125091111	125092111
chr4	125757342	125758342
chr4	125757542	125758542
chr4	125757942	125758942
chr4	125758142	125759142
chr4	125758342	125759342
chr4	125780740	125781740
chr4	125780940	125781940
chr4	128908049	128909049
chr4	128908649	128909649
chr4	128909449	128910449
chr4	128909649	128910649
chr4	132796435	132797435
chr4	132796635	132797635
chr4	137740029	137741029
chr4	137740229	137741229
chr4	137922367	137923367
chr4	141173219	141174219
chr4	141418203	141419203
chr4	141419203	141420203
chr4	141419403	141420403
chr4	148178570	148179570
chr4	149610477	149611477
chr4	149610677	149611677
chr4	150058108	150059108
chr4	150058308	150059308
chr4	150059508	150060508
chr4	150059708	150060708
chr4	150061308	150062308
chr4	150061508	150062508
chr4	150061708	150062708
chr4	150061908	150062908
chr4	150062908	150063908
chr4	150063108	150064108
chr4	150063908	150064908
chr4	150064108	150065108
chr4	150064308	150065308
chr4	150064708	150065708
chr4	150080275	150081275
chr4	150080475	150081475
chr4	150081275	150082275
chr4	150081475	150082475
chr4	150120000	150121000
chr4	150120199	150121199
chr4	150122083	150123083
chr4	150122280	150123280
chr4	150178303	150179303
chr4	150182285	150183285
chr4	150182485	150183485
chr4	150182685	150183685
chr4	150188158	150189158
chr4	150188358	150189358
chr4	150188558	150189558
chr4	150188758	150189758
chr4	150189358	150190358
chr4	150189558	150190558
chr4	150189758	150190758
chr4	150189958	150190958
chr4	150190158	150191158
chr4	150227557	150228557
chr4	150227757	150228757
chr4	150227957	150228957
chr4	150228157	150229157
chr4	150228357	150229357
chr4	150228557	150229557
chr4	150417624	150418624
chr4	150417824	150418824
chr4	150418024	150419024
chr4	151385434	151386434
chr4	154654664	154655664
chr4	154654864	154655864
chr4	155147600	155148600
chr3	3502830	3503830
chr3	9037594	9038594
chr3	9037794	9038794
chr3	19211110	19212110
chr3	19211310	19212310
chr3	50478688	50479688
chr3	51024981	51025981
chr3	51027011	51028011
chr3	51027611	51028611
chr3	51906630	51907630
chr3	57147608	57148608
chr3	57190828	57191828
chr3	57191023	57192023
chr3	57191218	57192218
chr3	57193048	57194048
chr3	57193648	57194648
chr3	57193848	57194848
chr3	57213767	57214767
chr3	57213955	57214955
chr3	57223650	57224650
chr3	57224426	57225426
chr3	57224620	57225620
chr3	57228206	57229206
chr3	57228406	57229406
chr3	57228806	57229806
chr3	57229006	57230006
chr3	57229206	57230206
chr3	57229406	57230406
chr3	57229606	57230606
chr3	57229806	57230806
chr3	85774845	85775845
chr3	89190493	89191493
chr3	89190693	89191693
chr3	89194093	89195093
chr3	89194293	89195293
chr3	89194493	89195493
chr3	90390046	90391046
chr3	95686267	95687267
chr3	95686430	95687430
chr3	95686593	95687593
chr3	101463680	101464680
chr3	103637184	103638184
chr3	107675627	107676627
chr3	107722521	107723521
chr3	109375659	109376659
chr3	121577420	121578420
chr3	122573644	122574644
chr3	122573844	122574844
chr3	122599764	122600764
chr3	129049334	129050334
chr3	135161131	135162131
chr3	137900927	137901927
chr2	24294916	24295916
chr2	24334905	24335905
chr2	24335104	24336104
chr2	30055629	30056629
chr2	30263028	30264028
chr2	30271483	30272483
chr2	30271683	30272683
chr2	32377514	32378514
chr2	32377714	32378714
chr2	32378514	32379514
chr2	32378714	32379714
chr2	32378914	32379914
chr2	32379114	32380114
chr2	32380514	32381514
chr2	32380714	32381714
chr2	34627437	34628437
chr2	69976682	69977682
chr2	69977478	69978478
chr2	75304026	75305026
chr2	75304426	75305426
chr2	75496917	75497917
chr2	75497117	75498117
chr2	76244382	76245382
chr2	119065916	119066916
chr2	121238822	121239822
chr2	121239422	121240422
chr2	123331348	123332348
chr2	131919435	131920435
chr2	131919635	131920635
chr2	152169158	152170158
chr2	152631107	152632107
chr2	152631907	152632907
chr2	165950631	165951631
chr2	167158245	167159245
chr2	169956389	169957389
chr2	172979727	172980727
chr2	172980927	172981927
chr2	178905496	178906496
chr2	180070237	180071237
chr2	180070437	180071437
chr1	36331303	36332303
chr1	38185797	38186797
chr1	38185997	38186997
chr1	39534761	39535761
chr1	39534961	39535961
chr1	55108706	55109706
chr1	55108906	55109906
chr1	55143990	55144990
chr1	56672485	56673485
chr1	59245640	59246640
chr1	59245835	59246835
chr1	59246420	59247420
chr1	59246615	59247615
chr1	64167298	64168298
chr1	64167498	64168498
chr1	64168098	64169098
chr1	64168298	64169298
chr1	74458358	74459358
chr1	89447868	89448868
chr1	90175617	90176617
chr1	90176417	90177417
chr1	90176617	90177617
chr1	90184641	90185641
chr1	90184841	90185841
chr1	95759364	95760364
chr1	129101850	129102850
chr1	129146401	129147401
chr1	134009742	134010742
chr1	134009942	134010942
chr1	153936379	153937379
chr1	153936579	153937579
chr1	163896061	163897061
chr1	166344414	166345414
chr1	166344614	166345614
chr1	174431488	174432488
chr1	179640935	179641935
chr1	179641535	179642535
chr1	179641735	179642735
chr9	40126749	40127749
chr9	40126949	40127949
chr9	40127149	40128149
chr9	44481256	44482256
chr9	48515502	48516502
chr9	51124382	51125382
chr9	51124582	51125582
chr9	51125182	51126182
chr9	51125382	51126382
chr9	51125582	51126582
chr9	51125782	51126782
chr9	51125982	51126982
chr9	57787759	57788759
chr9	57787959	57788959
chr9	59799676	59800676
chr9	61113294	61114294
chr9	63971998	63972998
chr9	63972194	63973194
chr9	75209238	75210238
chr9	75209438	75210438
chr9	75209638	75210638
chr9	75209838	75210838
chr9	75210038	75211038
chr9	75210238	75211238
chr9	75210438	75211438
chr9	75210838	75211838
chr9	75211038	75212038
chr9	75211238	75212238
chr9	75211438	75212438
chr9	75211638	75212638
chr9	75213174	75214174
chr9	75213374	75214374
chr9	75213574	75214574
chr9	75213774	75214774
chr9	75213974	75214974
chr9	75214174	75215174
chr9	75214374	75215374
chr9	75214731	75215731
chr9	75214901	75215901
chr9	75215859	75216859
chr9	75216043	75217043
chr9	75216227	75217227
chr9	75226513	75227513
chr9	75226713	75227713
chr9	75253872	75254872
chr9	75254072	75255072
chr9	75254272	75255272
chr9	75254472	75255472
chr9	75254672	75255672
chr9	75255072	75256072
chr9	75255272	75256272
chr9	75255472	75256472
chr9	75255672	75256672
chr9	75255872	75256872
chr9	75256072	75257072
chr9	75256272	75257272
chr9	75256472	75257472
chr9	78076434	78077434
chr9	78076634	78077634
chr9	78076834	78077834
chr9	78078434	78079434
chr9	78078634	78079634
chr9	78104587	78105587
chr9	78104787	78105787
chr9	78104987	78105987
chr9	78105187	78106187
chr9	92113819	92114819
chr9	92123458	92124458
chr9	92123647	92124647
chr9	92123836	92124836
chr9	92124025	92125025
chr9	92124214	92125214
chr9	92144775	92145775
chr9	92144975	92145975
chr9	92145175	92146175
chr9	92145575	92146575
chr9	92145775	92146775
chr9	92199818	92200818
chr9	92231224	92232224
chr9	92231408	92232408
chr9	92268677	92269677
chr9	94438251	94439251
chr9	106339296	106340296
chr9	106339496	106340496
chr9	106340496	106341496
chr9	106340696	106341696
chr9	106793347	106794347
chr9	121542861	121543861
chr9	121707604	121708604
chr8	4474156	4475156
chr8	10946016	10947016
chr8	23090877	23091877
chr8	71834529	71835529
chr8	71840679	71841679
chr8	71840879	71841879
chr8	81679617	81680617
chr8	86590634	86591634
chr8	86627555	86628555
chr8	95801413	95802413
chr8	96401628	96402628
chr8	96436485	96437485
chr8	96436685	96437685
chr8	96695629	96696629
chr8	96695815	96696815
chr8	96696187	96697187
chr8	96696373	96697373
chr8	96696559	96697559
chr8	96701724	96702724
chr8	96701924	96702924
chr8	96702124	96703124
chr8	96703524	96704524
chr8	96705868	96706868
chr8	96706268	96707268
chr8	96706468	96707468
chr8	96706668	96707668
chr8	96707068	96708068
chr8	96709673	96710673
chr8	96709873	96710873
chr8	107960679	107961679
chr8	107961065	107962065
chr8	109817251	109818251
chr8	112388925	112389925
chr8	112469081	112470081
chr8	112469281	112470281
chr8	112469481	112470481
chr8	112470281	112471281
chr8	118587738	118588738
chr8	118587927	118588927
chr8	118588328	118589328
chr8	118588528	118589528
chr8	118591911	118592911
chr8	118594561	118595561
chr8	118594760	118595760
chr8	118665318	118666318
chr8	118667557	118668557
chr8	118667757	118668757
chr8	118805165	118806165
chr8	118805356	118806356
chr8	118814868	118815868
chr8	125715973	125716973

## Sheet: CV H3K27ac regions
Supplemental Table S8: CV H3K27ac sites (related to Fig. 3)
CV H3K27ac regions
chrX	92042148	92043148
chr13	8777190	8778190
chr13	51121256	51122256
chr13	51121456	51122456
chr13	51121656	51122656
chr13	51121856	51122856
chr13	53074071	53075071
chr13	53074271	53075271
chr13	53074471	53075471
chr13	53074871	53075871
chr13	53075071	53076071
chr13	53075271	53076271
chr13	53075471	53076471
chr13	53076471	53077471
chr13	53077071	53078071
chr13	53077271	53078271
chr13	53077471	53078471
chr13	59933062	59934062
chr13	59933862	59934862
chr13	59934062	59935062
chr13	59936838	59937838
chr13	63008279	63009279
chr13	63008471	63009471
chr13	74242044	74243044
chr13	74259002	74260002
chr13	74259202	74260202
chr13	74259802	74260802
chr13	74260002	74261002
chr13	74260602	74261602
chr13	74260802	74261802
chr13	74261002	74262002
chr13	74261202	74262202
chr13	74261402	74262402
chr13	74261602	74262602
chr13	74261802	74262802
chr13	74950670	74951670
chr13	74950858	74951858
chr13	76393222	76394222
chr13	101221506	101222506
chr13	101221706	101222706
chr13	101221906	101222906
chr13	101222106	101223106
chr13	104490738	104491738
chr13	104490938	104491938
chr13	110019726	110020726
chr13	110019926	110020926
chr13	110050901	110051901
chr12	4158588	4159588
chr12	4159170	4160170
chr12	25574245	25575245
chr12	25574445	25575445
chr12	25574645	25575645
chr12	25575045	25576045
chr12	25575245	25576245
chr12	25575445	25576445
chr12	25575845	25576845
chr12	25576045	25577045
chr12	25576245	25577245
chr12	32635049	32636049
chr12	70782230	70783230
chr12	102483740	102484740
chr12	102483907	102484907
chr12	102996717	102997717
chr12	102996916	102997916
chr12	105378993	105379993
chr12	106119572	106120572
chr12	106119772	106120772
chr12	106119972	106120972
chr12	106120172	106121172
chr12	106120372	106121372
chr12	106243006	106244006
chr12	106243200	106244200
chr12	106991031	106992031
chr12	106991231	106992231
chr12	106991431	106992431
chr12	111441688	111442688
chr11	32506723	32507723
chr11	57330864	57331864
chr11	60054145	60055145
chr11	60054345	60055345
chr11	60054545	60055545
chr11	72115167	72116167
chr11	76431566	76432566
chr11	77001832	77002832
chr11	77002032	77003032
chr11	77002232	77003232
chr11	77002432	77003432
chr11	78659877	78660877
chr11	78660077	78661077
chr11	78660277	78661277
chr11	78660477	78661477
chr11	78660677	78661677
chr11	78660877	78661877
chr11	78661877	78662877
chr11	78662077	78663077
chr11	78662677	78663677
chr11	78662877	78663877
chr11	78663077	78664077
chr11	78664877	78665877
chr11	78665077	78666077
chr11	82765649	82766649
chr11	82765833	82766833
chr11	94593296	94594296
chr11	99104648	99105648
chr11	99104848	99105848
chr11	106818832	106819832
chr11	106819032	106820032
chr11	106819232	106820232
chr11	108154908	108155908
chr11	108155108	108156108
chr11	109331183	109332183
chr11	109331783	109332783
chr11	109332383	109333383
chr11	109332583	109333583
chr11	109332783	109333783
chr11	109332983	109333983
chr11	109333183	109334183
chr11	109333383	109334383
chr11	109333583	109334583
chr11	109333783	109334783
chr11	109333983	109334983
chr11	109356263	109357263
chr11	109357263	109358263
chr11	109404554	109405554
chr11	109404754	109405754
chr11	109404954	109405954
chr11	109405154	109406154
chr11	109405354	109406354
chr11	109405554	109406554
chr11	109405754	109406754
chr11	109406554	109407554
chr11	109406754	109407754
chr11	109410323	109411323
chr11	109416286	109417286
chr11	109416486	109417486
chr11	109416686	109417686
chr11	110287623	110288623
chr11	110287815	110288815
chr11	110288007	110289007
chr11	110288199	110289199
chr11	110309352	110310352
chr11	110309552	110310552
chr11	110309752	110310752
chr11	117742607	117743607
chr11	119174712	119175712
chr11	119174912	119175912
chr11	119175112	119176112
chr11	120924840	120925840
chr11	120946759	120947759
chr11	120951559	120952559
chr11	121411367	121412367
chr11	121412367	121413367
chr10	4537850	4538850
chr10	4538050	4539050
chr10	23614718	23615718
chr10	23793861	23794861
chr10	44169063	44170063
chr10	44169263	44170263
chr10	44767788	44768788
chr10	44767988	44768988
chr10	51284581	51285581
chr10	51284781	51285781
chr10	57513692	57514692
chr10	57513888	57514888
chr10	57514084	57515084
chr10	57514280	57515280
chr10	57514476	57515476
chr10	75649317	75650317
chr10	79398865	79399865
chr10	79399061	79400061
chr10	79399257	79400257
chr10	88318895	88319895
chr10	88319495	88320495
chr10	94571947	94572947
chr10	101836767	101837767
chr10	101836967	101837967
chr10	117038342	117039342
chr10	126364549	126365549
chr10	126365325	126366325
chr10	126365519	126366519
chr10	127439683	127440683
chr10	127439883	127440883
chr17	13733623	13734623
chr17	13733821	13734821
chr17	15329692	15330692
chr17	24104071	24105071
chr17	28368048	28369048
chr17	28369768	28370768
chr17	28369968	28370968
chr17	28416862	28417862
chr17	28417062	28418062
chr17	28417262	28418262
chr17	28417462	28418462
chr17	28418062	28419062
chr17	29050655	29051655
chr17	29051255	29052255
chr17	31561035	31562035
chr17	31569781	31570781
chr17	31569981	31570981
chr17	31570181	31571181
chr17	31570381	31571381
chr17	35018240	35019240
chr17	35018440	35019440
chr17	46108444	46109444
chr17	48111224	48112224
chr17	48111424	48112424
chr17	48111624	48112624
chr17	48111824	48112824
chr17	48112024	48113024
chr17	48543057	48544057
chr17	48594739	48595739
chr17	48594939	48595939
chr17	57371332	57372332
chr17	87872920	87873920
chr17	87873110	87874110
chr17	87873300	87874300
chr17	87876657	87877657
chr17	87877257	87878257
chr17	87877457	87878457
chr17	87877657	87878657
chr17	87881706	87882706
chr17	87882100	87883100
chr17	87882297	87883297
chr17	87882494	87883494
chr16	3114564	3115564
chr16	3114624	3115624
chr16	3350888	3351888
chr16	3350947	3351947
chr16	4034235	4035235
chr16	4034435	4035435
chr16	4381397	4382397
chr16	16367668	16368668
chr16	20729869	20730869
chr16	22140233	22141233
chr16	22141033	22142033
chr16	22141233	22142233
chr16	23610322	23611322
chr16	33784457	33785457
chr16	33785657	33786657
chr16	35768629	35769629
chr16	37596441	37597441
chr16	76863729	76864729
chr16	78236137	78237137
chr16	96481431	96482431
chr15	3177039	3178039
chr15	3177239	3178239
chr15	3186523	3187523
chr15	3186723	3187723
chr15	3196265	3197265
chr15	3196465	3197465
chr15	3221520	3222520
chr15	3222320	3223320
chr15	5395679	5396679
chr15	5395879	5396879
chr15	5466747	5467747
chr15	5466947	5467947
chr15	5467147	5468147
chr15	6325110	6326110
chr15	38397723	38398723
chr15	38397923	38398923
chr15	38398123	38399123
chr15	38398323	38399323
chr15	38398523	38399523
chr15	38398723	38399723
chr15	38398923	38399923
chr15	38400723	38401723
chr15	38400923	38401923
chr15	38401123	38402123
chr15	38401323	38402323
chr15	38401523	38402523
chr15	38401723	38402723
chr15	38401923	38402923
chr15	38402123	38403123
chr15	58038878	58039878
chr15	58039067	58040067
chr15	58045757	58046757
chr15	58045956	58046956
chr15	59550690	59551690
chr15	59550882	59551882
chr15	74916656	74917656
chr15	74916829	74917829
chr15	76398167	76399167
chr15	76398363	76399363
chr15	76398559	76399559
chr15	76406910	76407910
chr15	76884384	76885384
chr15	76884584	76885584
chr15	76884784	76885784
chr15	76884984	76885984
chr15	76885184	76886184
chr15	76887594	76888594
chr15	76887794	76888794
chr15	77066797	77067797
chr15	78411235	78412235
chr15	78411426	78412426
chr15	82872479	82873479
chr15	82873079	82874079
chr15	88564000	88565000
chr15	98314920	98315920
chr15	100495620	100496620
chr15	100495820	100496820
chr15	100496620	100497620
chr15	100496820	100497820
chr15	102228916	102229916
chr14	9118730	9119730
chr14	9118784	9119784
chr14	13122102	13123102
chr14	13122295	13123295
chr14	51514911	51515911
chr14	51515103	51516103
chr14	51515679	51516679
chr14	51709122	51710122
chr14	54852129	54853129
chr14	54853129	54854129
chr14	54853329	54854329
chr14	60796120	60797120
chr14	60796320	60797320
chr14	60796520	60797520
chr14	111153271	111154271
chr14	121791285	121792285
chr19	3954881	3955881
chr19	5374953	5375953
chr19	10038171	10039171
chr19	10038371	10039371
chr19	10038571	10039571
chr19	10049353	10050353
chr19	10049553	10050553
chr19	10049753	10050753
chr19	10057595	10058595
chr19	10057795	10058795
chr19	10057995	10058995
chr19	10058195	10059195
chr19	17468644	17469644
chr19	17468844	17469844
chr19	21178730	21179730
chr19	21178930	21179930
chr19	21179130	21180130
chr19	21179330	21180330
chr19	21179530	21180530
chr19	21179930	21180930
chr19	21180930	21181930
chr19	21181130	21182130
chr19	21181530	21182530
chr19	21720789	21721789
chr19	24748435	24749435
chr19	24748627	24749627
chr19	34672329	34673329
chr19	34672529	34673529
chr19	34672729	34673729
chr19	34672929	34673929
chr19	34673329	34674329
chr19	34675503	34676503
chr19	34675691	34676691
chr19	34676255	34677255
chr19	34676443	34677443
chr19	34703320	34704320
chr19	40423131	40424131
chr19	41420979	41421979
chr19	41421979	41422979
chr19	47654092	47655092
chr19	53534663	53535663
chr19	53534858	53535858
chr19	61299430	61300430
chr18	3005367	3006367
chr18	21079684	21080684
chr18	21090155	21091155
chr18	21090355	21091355
chr18	21094857	21095857
chr18	21095057	21096057
chr18	21095657	21096657
chr18	21095857	21096857
chr18	21201635	21202635
chr18	36885441	36886441
chr18	38726297	38727297
chr18	46311683	46312683
chr18	79306329	79307329
chr7	19819737	19820737
chr7	20406651	20407651
chr7	20417397	20418397
chr7	31137580	31138580
chr7	31144147	31145147
chr7	48876738	48877738
chr7	48876908	48877908
chr7	53977975	53978975
chr7	53978775	53979775
chr7	53989352	53990352
chr7	53989552	53990552
chr7	53990752	53991752
chr7	86017275	86018275
chr7	86017875	86018875
chr7	87546907	87547907
chr7	87547107	87548107
chr7	104601571	104602571
chr7	104601769	104602769
chr7	104601967	104602967
chr7	104602165	104603165
chr7	104602363	104603363
chr7	104602561	104603561
chr7	106249538	106250538
chr7	106250131	106251131
chr7	106250325	106251325
chr7	106582809	106583809
chr7	119822511	119823511
chr7	119848506	119849506
chr7	119848699	119849699
chr7	119848892	119849892
chr7	119849085	119850085
chr7	121989643	121990643
chr7	121989843	121990843
chr7	121991043	121992043
chr7	121991243	121992243
chr7	121991443	121992443
chr7	125744187	125745187
chr7	128491136	128492136
chr7	132695885	132696885
chr7	132701539	132702539
chr7	132701739	132702739
chr7	132701939	132702939
chr7	150474661	150475661
chr6	18299935	18300935
chr6	18300134	18301134
chr6	18301129	18302129
chr6	31267675	31268675
chr6	34612506	34613506
chr6	34612690	34613690
chr6	39204363	39205363
chr6	39204763	39205763
chr6	39204963	39205963
chr6	47325598	47326598
chr6	47325798	47326798
chr6	52657685	52658685
chr6	54805026	54806026
chr6	54805220	54806220
chr6	72882534	72883534
chr6	72882734	72883734
chr6	72882934	72883934
chr6	72883134	72884134
chr6	72883334	72884334
chr6	72883534	72884534
chr6	78320455	78321455
chr6	78320655	78321655
chr6	78320855	78321855
chr6	78321255	78322255
chr6	78321455	78322455
chr6	78321655	78322655
chr6	78321855	78322855
chr6	78322055	78323055
chr6	78322255	78323255
chr6	78322455	78323455
chr6	78322655	78323655
chr6	78322855	78323855
chr6	78323055	78324055
chr6	78415787	78416787
chr6	78415987	78416987
chr6	78416187	78417187
chr6	78416387	78417387
chr6	78416587	78417587
chr6	78417387	78418387
chr6	78417587	78418587
chr6	78417987	78418987
chr6	78418187	78419187
chr6	78418387	78419387
chr6	78419187	78420187
chr6	90309669	90310669
chr6	90519478	90520478
chr6	90519678	90520678
chr6	90519878	90520878
chr6	108422941	108423941
chr6	108423141	108424141
chr6	108423341	108424341
chr6	108423541	108424541
chr6	108476519	108477519
chr6	115720309	115721309
chr6	118324855	118325855
chr6	122574148	122575148
chr6	122574348	122575348
chr6	134741687	134742687
chr6	137084008	137085008
chr6	137642594	137643594
chr5	5319757	5320757
chr5	39234814	39235814
chr5	39235008	39236008
chr5	39235590	39236590
chr5	44248946	44249946
chr5	44249146	44250146
chr5	44249546	44250546
chr5	44249746	44250746
chr5	46473742	46474742
chr5	50422797	50423797
chr5	50422997	50423997
chr5	73581534	73582534
chr5	73581734	73582734
chr5	91305357	91306357
chr5	91305557	91306557
chr5	101035692	101036692
chr5	101035892	101036892
chr5	101036092	101037092
chr5	101037292	101038292
chr5	108504753	108505753
chr5	108504953	108505953
chr5	108505153	108506153
chr5	108505353	108506353
chr5	108505953	108506953
chr5	108506153	108507153
chr5	108506353	108507353
chr5	114422094	114423094
chr5	114422290	114423290
chr5	114422486	114423486
chr5	114438725	114439725
chr5	114442143	114443143
chr5	114442343	114443343
chr5	114453677	114454677
chr5	114453874	114454874
chr5	134913525	134914525
chr5	135565347	135566347
chr5	135565547	135566547
chr5	135565747	135566747
chr5	135565947	135566947
chr5	135566147	135567147
chr5	135566347	135567347
chr5	137383618	137384618
chr5	137383812	137384812
chr5	138589331	138590331
chr5	138589531	138590531
chr5	138589731	138590731
chr5	138589931	138590931
chr5	138590131	138591131
chr5	138590331	138591331
chr5	138590531	138591531
chr5	138590731	138591731
chr5	138590931	138591931
chr5	138591131	138592131
chr5	138591331	138592331
chr5	140268254	140269254
chr5	140268451	140269451
chr5	145124453	145125453
chr5	145704128	145705128
chr5	148804091	148805091
chr5	148804291	148805291
chr5	150455061	150456061
chr5	150455261	150456261
chr5	150456061	150457061
chr5	150456261	150457261
chr5	150456461	150457461
chr5	150456661	150457661
chr4	11110468	11111468
chr4	32187349	32188349
chr4	32187749	32188749
chr4	32187949	32188949
chr4	33368070	33369070
chr4	33368270	33369270
chr4	33368470	33369470
chr4	33368670	33369670
chr4	33370670	33371670
chr4	33371870	33372870
chr4	33372070	33373070
chr4	34445572	34446572
chr4	34445690	34446690
chr4	34445808	34446808
chr4	43978119	43979119
chr4	43978319	43979319
chr4	43978519	43979519
chr4	55871444	55872444
chr4	56905446	56906446
chr4	56905642	56906642
chr4	56965779	56966779
chr4	56965953	56966953
chr4	57248165	57249165
chr4	57248365	57249365
chr4	57251965	57252965
chr4	57252165	57253165
chr4	57252365	57253365
chr4	57252565	57253565
chr4	57252765	57253765
chr4	57252965	57253965
chr4	57253165	57254165
chr4	63223017	63224017
chr4	63223217	63224217
chr4	88286552	88287552
chr4	101028580	101029580
chr4	101028780	101029780
chr4	106295090	106296090
chr4	106978992	106979992
chr4	106979192	106980192
chr4	114769312	114770312
chr4	117930844	117931844
chr4	129062752	129063752
chr4	132120986	132121986
chr4	132121182	132122182
chr4	132121378	132122378
chr4	135473954	135474954
chr4	135474154	135475154
chr4	135476954	135477954
chr4	135728274	135729274
chr4	135728474	135729474
chr4	135728674	135729674
chr4	136357678	136358678
chr4	136357875	136358875
chr4	136358072	136359072
chr4	141793643	141794643
chr4	141793843	141794843
chr4	141794043	141795043
chr4	149260401	149261401
chr4	149290090	149291090
chr4	149290290	149291290
chr4	149327800	149328800
chr4	149736453	149737453
chr4	149739922	149740922
chr4	149740122	149741122
chr4	155069868	155070868
chr3	41424287	41425287
chr3	84976008	84977008
chr3	92018649	92019649
chr3	92018848	92019848
chr3	92019047	92020047
chr3	92019246	92020246
chr3	92019445	92020445
chr3	92053372	92054372
chr3	92053572	92054572
chr3	92053772	92054772
chr3	92054372	92055372
chr3	92088164	92089164
chr3	92088734	92089734
chr3	92088924	92089924
chr3	92120104	92121104
chr3	92120181	92121181
chr3	93402270	93403270
chr3	93402470	93403470
chr3	97035558	97036558
chr3	97036330	97037330
chr3	97036523	97037523
chr3	104023638	104024638
chr3	104623728	104624728
chr3	108086957	108087957
chr3	127445933	127446933
chr3	127446117	127447117
chr3	127446750	127447750
chr3	127446950	127447950
chr3	127447150	127448150
chr3	127481739	127482739
chr3	127482139	127483139
chr3	127482339	127483339
chr3	127482539	127483539
chr3	127482739	127483739
chr3	127483139	127484139
chr3	127492138	127493138
chr3	127492538	127493538
chr3	127492738	127493738
chr3	145780291	145781291
chr3	151412060	151413060
chr3	151412217	151413217
chr2	11296340	11297340
chr2	11296540	11297540
chr2	11296740	11297740
chr2	11296940	11297940
chr2	11297140	11298140
chr2	11297340	11298340
chr2	11297540	11298540
chr2	11297740	11298740
chr2	11297940	11298940
chr2	11298140	11299140
chr2	11298340	11299340
chr2	11298540	11299540
chr2	11319450	11320450
chr2	11319650	11320650
chr2	11422721	11423721
chr2	20260929	20261929
chr2	20261124	20262124
chr2	20261514	20262514
chr2	27273224	27274224
chr2	27273424	27274424
chr2	27273624	27274624
chr2	29262702	29263702
chr2	29262902	29263902
chr2	29263502	29264502
chr2	37558273	37559273
chr2	60047215	60048215
chr2	69441807	69442807
chr2	71703965	71704965
chr2	71704565	71705565
chr2	72589806	72590806
chr2	72590006	72591006
chr2	72893602	72894602
chr2	110025097	110026097
chr2	110026297	110027297
chr2	119000852	119001852
chr2	119001252	119002252
chr2	122091535	122092535
chr2	122091730	122092730
chr2	122092315	122093315
chr2	122092510	122093510
chr2	122092705	122093705
chr2	122122987	122123987
chr2	122123187	122124187
chr2	122123387	122124387
chr2	122123587	122124587
chr2	122123787	122124787
chr2	122123987	122124987
chr2	122124187	122125187
chr2	122124387	122125387
chr2	122124587	122125587
chr2	122126379	122127379
chr2	122126573	122127573
chr2	124423259	124424259
chr2	124435139	124436139
chr2	124436339	124437339
chr2	124436539	124437539
chr2	130664998	130665998
chr2	131317737	131318737
chr2	131321097	131322097
chr2	131321291	131322291
chr2	131321485	131322485
chr2	132520913	132521913
chr2	143934210	143935210
chr2	145638412	145639412
chr2	157992487	157993487
chr2	158002546	158003546
chr2	158002746	158003746
chr2	158002946	158003946
chr2	158003146	158004146
chr2	158003346	158004346
chr2	158003746	158004746
chr2	158003946	158004946
chr2	160446738	160447738
chr2	160446938	160447938
chr2	160447738	160448738
chr2	173042956	173043956
chr2	173043156	173044156
chr2	173043356	173044356
chr2	173043556	173044556
chr2	173043956	173044956
chr2	173044156	173045156
chr2	173044556	173045556
chr2	173100979	173101979
chr2	173101179	173102179
chr2	173101379	173102379
chr2	173146674	173147674
chr2	173146872	173147872
chr2	180936047	180937047
chr2	180936247	180937247
chr1	7487687	7488687
chr1	7487884	7488884
chr1	31099347	31100347
chr1	31099547	31100547
chr1	39248797	39249797
chr1	39248997	39249997
chr1	45981945	45982945
chr1	45982136	45983136
chr1	45982327	45983327
chr1	59450966	59451966
chr1	59451166	59452166
chr1	59795447	59796447
chr1	59795647	59796647
chr1	59795847	59796847
chr1	59796047	59797047
chr1	59796247	59797247
chr1	59796447	59797447
chr1	120543857	120544857
chr1	123244936	123245936
chr1	123246329	123247329
chr1	123246528	123247528
chr1	123246926	123247926
chr1	123247125	123248125
chr1	132723323	132724323
chr1	132724723	132725723
chr1	133694808	133695808
chr1	133951825	133952825
chr1	133954297	133955297
chr1	133954497	133955497
chr1	133954697	133955697
chr1	133954897	133955897
chr1	133955097	133956097
chr1	133955297	133956297
chr1	133955497	133956497
chr1	133956897	133957897
chr1	133957097	133958097
chr1	133957297	133958297
chr1	133957497	133958497
chr1	133957697	133958697
chr1	133957897	133958897
chr1	133958097	133959097
chr1	133958697	133959697
chr1	133958897	133959897
chr1	133959097	133960097
chr1	133963400	133964400
chr1	133963597	133964597
chr1	133963794	133964794
chr1	133963991	133964991
chr1	174492089	174493089
chr1	181580818	181581818
chr1	181581010	181582010
chr1	187274071	187275071
chr1	187411238	187412238
chr1	187411437	187412437
chr1	193703752	193704752
chr1	193703945	193704945
chr1	193704138	193705138
chr1	193704717	193705717
chr1	193715675	193716675
chr1	193715870	193716870
chr1	194201964	194202964
chr9	5308609	5309609
chr9	5308809	5309809
chr9	5309009	5310009
chr9	5309409	5310409
chr9	5309609	5310609
chr9	14183651	14184651
chr9	40262608	40263608
chr9	40262808	40263808
chr9	40263008	40264008
chr9	50270693	50271693
chr9	53178641	53179641
chr9	53620404	53621404
chr9	66000405	66001405
chr9	66000605	66001605
chr9	66000805	66001805
chr9	66001405	66002405
chr9	66001605	66002605
chr9	66001805	66002805
chr9	66002005	66003005
chr9	66002205	66003205
chr9	66099216	66100216
chr9	70676444	70677444
chr9	70676644	70677644
chr9	70676844	70677844
chr9	70677044	70678044
chr9	70678044	70679044
chr9	70678244	70679244
chr9	70678444	70679444
chr9	70678644	70679644
chr9	70680644	70681644
chr9	70680844	70681844
chr9	70681044	70682044
chr9	70681244	70682244
chr9	70689657	70690657
chr9	71966027	71967027
chr9	71966219	71967219
chr9	77362960	77363960
chr9	77363560	77364560
chr9	77363760	77364760
chr9	77363960	77364960
chr9	77364360	77365360
chr9	77364560	77365560
chr9	77364760	77365760
chr9	77364960	77365960
chr9	77365160	77366160
chr9	77365360	77366360
chr9	77365560	77366560
chr9	77365760	77366760
chr9	77365960	77366960
chr9	77366160	77367160
chr9	77366360	77367360
chr9	77366560	77367560
chr9	77366760	77367760
chr9	95469756	95470756
chr9	95469912	95470912
chr9	95739107	95740107
chr9	95739307	95740307
chr9	102825927	102826927
chr9	102826127	102827127
chr9	102826327	102827327
chr9	102826527	102827527
chr9	108557435	108558435
chr9	108557630	108558630
chr9	108831340	108832340
chr9	116925149	116926149
chr9	116925549	116926549
chr9	116926749	116927749
chr9	116926949	116927949
chr9	116927149	116928149
chr9	116927349	116928349
chr9	122654408	122655408
chr9	122654608	122655608
chr9	122940251	122941251
chr8	13325771	13326771
chr8	26217131	26218131
chr8	26217327	26218327
chr8	35118917	35119917
chr8	64406930	64407930
chr8	73823642	73824642
chr8	73823842	73824842
chr8	81603139	81604139
chr8	81603339	81604339
chr8	93378600	93379600
chr8	93378762	93379762
chr8	109961534	109962534
chr8	109961734	109962734
chr8	119784025	119785025
chr8	119784225	119785225
chr8	124945742	124946742
chr8	129082284	129083284
chr8	129372572	129373572
chr8	129372772	129373772

## Sheet: All DHS sites
Supplemental Table S8: DHS sites (related to Supplemental Fig. S4 and Supplemental Fig. S6)
All DHS sites used for alignments
chr1	167166660	167167660
chr5	125945721	125946721
chr1	94076993	94077993
chr16	29782201	29783201
chr1	184212413	184213413
chr12	48934491	48935491
chr11	29146805	29147805
chr9	40538534	40539534
chr1	187341131	187342131
chr15	75533449	75534449
chr2	164228075	164229075
chr6	88033954	88034954
chr8	25590044	25591044
chr11	110287523	110288523
chr12	80291486	80292486
chr8	113917246	113918246
chr6	146582579	146583579
chr10	124597885	124598885
chr16	26581209	26582209
chr7	26035302	26036302
chr8	96019259	96020259
chr2	140615804	140616804
chr3	88270711	88271711
chr8	129767459	129768459
chr18	20686159	20687159
chr11	78136037	78137037
chr18	75979314	75980314
chr8	36770624	36771624
chr4	9062619	9063619
chr11	66727449	66728449
chr11	87975285	87976285
chr1	184838089	184839089
chr14	103745610	103746610
chr5	145726249	145727249
chr6	29222159	29223159
chr18	34008698	34009698
chr5	135582183	135583183
chr1	157140269	157141269
chr8	91220290	91221290
chr16	93607547	93608547
chr1	155233500	155234500
chr5	99583362	99584362
chr5	40035448	40036448
chr5	31593069	31594069
chr2	92314663	92315663
chr4	62278478	62279478
chr8	97855649	97856649
chr13	54285035	54286035
chr4	132439923	132440923
chr8	75843098	75844098
chr2	49642668	49643668
chr19	32647433	32648433
chr3	146183929	146184929
chr16	30976984	30977984
chr6	114987431	114988431
chr1	186706466	186707466
chr18	66634696	66635696
chr17	35653485	35654485
chr14	47379634	47380634
chr7	123748911	123749911
chr7	20556612	20557612
chr4	149167745	149168745
chr13	48902444	48903444
chr17	33028045	33029045
chr10	62892446	62893446
chr6	60636750	60637750
chr1	174306047	174307047
chr14	28409151	28410151
chr19	23761403	23762403
chr9	102673504	102674504
chr3	145626049	145627049
chrX	84483235	84484235
chr5	148768341	148769341
chr15	101349923	101350923
chr16	91351975	91352975
chr8	93317320	93318320
chr8	36787958	36788958
chr11	90558887	90559887
chr10	93002246	93003246
chr12	114081697	114082697
chr17	11032727	11033727
chr4	3737099	3738099
chr6	30643233	30644233
chr11	75840832	75841832
chr2	71557301	71558301
chr16	38631899	38632899
chr2	155663384	155664384
chr15	82247621	82248621
chr18	10913181	10914181
chr5	110786243	110787243
chr7	87484637	87485637
chr16	90412394	90413394
chr6	112312279	112313279
chr19	56762254	56763254
chr16	11518826	11519826
chr1	194014139	194015139
chr15	77834025	77835025
chr19	55135162	55136162
chr18	78329536	78330536
chr6	29643680	29644680
chr6	108777975	108778975
chr3	41398154	41399154
chr6	135222778	135223778
chr6	48070814	48071814
chr6	145778320	145779320
chr6	11857314	11858314
chr17	48340369	48341369
chr13	100785067	100786067
chr1	169566832	169567832
chr5	35474111	35475111
chr1	137209951	137210951
chr6	113187253	113188253
chr2	172326565	172327565
chr15	85671058	85672058
chr19	31965392	31966392
chr3	53251824	53252824
chr10	98436985	98437985
chr18	66197719	66198719
chr12	5290198	5291198
chr19	15999076	16000076
chr9	17791766	17792766
chr13	37494755	37495755
chr10	94196614	94197614
chr10	24921554	24922554
chr14	69994178	69995178
chr11	17058686	17059686
chr3	95732591	95733591
chr18	78323284	78324284
chr15	85662228	85663228
chr11	61497040	61498040
chr4	143001810	143002810
chr11	88816281	88817281
chr10	17190363	17191363
chr10	96184828	96185828
chr4	45624726	45625726
chr11	31848873	31849873
chr14	19725440	19726440
chr19	3955622	3956622
chr2	11474763	11475763
chr7	80751385	80752385
chr5	87960964	87961964
chr3	121996531	121997531
chr1	120944268	120945268
chr9	115274188	115275188
chr15	98447117	98448117
chr1	157070981	157071981
chr1	39924454	39925454
chr19	36483702	36484702
chr15	99426524	99427524
chr13	47287233	47288233
chr2	156912174	156913174
chr1	185500195	185501195
chr8	74249124	74250124
chr2	116722251	116723251
chr11	87274980	87275980
chr6	48551559	48552559
chr6	147039489	147040489
chr2	51004241	51005241
chr5	75219459	75220459
chr5	44336280	44337280
chr19	56430693	56431693
chr10	80499530	80500530
chr11	79733091	79734091
chr5	104339694	104340694
chr6	55461412	55462412
chr17	86934875	86935875
chr5	92890073	92891073
chr12	118686545	118687545
chr12	12794782	12795782
chr6	29228702	29229702
chr1	8306758	8307758
chr15	101145902	101146902
chr3	122350584	122351584
chr4	117998749	117999749
chr15	41619706	41620706
chr18	4919980	4920980
chr10	96037144	96038144
chr13	114540696	114541696
chr1	191511689	191512689
chr14	20527174	20528174
chr10	8635236	8636236
chr8	118494959	118495959
chr11	87950967	87951967
chr18	66395737	66396737
chr11	109105548	109106548
chr8	36222060	36223060
chr6	56640905	56641905
chr1	53409057	53410057
chr1	89081096	89082096
chr2	162707867	162708867
chr8	49688505	49689505
chr4	141297501	141298501
chr2	73776672	73777672
chr17	73130813	73131813
chr16	91358422	91359422
chr5	145218151	145219151
chr4	47487030	47488030
chr8	120219191	120220191
chr5	115798607	115799607
chr13	98744506	98745506
chr5	35852920	35853920
chr9	62268575	62269575
chr5	28362189	28363189
chr6	136467162	136468162
chr17	33052562	33053562
chr3	88259958	88260958
chr11	77907642	77908642
chr13	94453025	94454025
chr2	154483315	154484315
chr1	78396053	78397053
chr11	23948923	23949923
chr1	108757168	108758168
chr10	117065959	117066959
chr5	34856193	34857193
chr1	128644180	128645180
chr4	133313097	133314097
chr15	38591105	38592105
chr8	4868468	4869468
chr16	5013341	5014341
chr4	10068384	10069384
chr18	70212451	70213451
chr8	18768588	18769588
chr18	46484376	46485376
chr8	72757876	72758876
chr7	85927471	85928471
chr7	127897890	127898890
chr3	132972548	132973548
chr6	146836485	146837485
chr7	97450406	97451406
chr4	108470770	108471770
chr11	62574361	62575361
chr8	86535630	86536630
chr3	89492290	89493290
chr5	46969576	46970576
chr8	92871811	92872811
chr6	83643489	83644489
chr12	5283517	5284517
chr2	91895173	91896173
chr6	134775795	134776795
chr4	44085181	44086181
chr11	55017310	55018310
chr17	14304287	14305287
chr18	66525945	66526945
chr6	6166716	6167716
chr9	21069125	21070125
chr10	119638845	119639845
chr4	98553526	98554526
chr17	69788214	69789214
chr17	33531053	33532053
chr16	19759769	19760769
chr3	84090889	84091889
chr14	46879714	46880714
chr6	112223161	112224161
chr8	101405962	101406962
chr5	91467395	91468395
chr17	17510544	17511544
chr10	111032326	111033326
chr11	6174442	6175442
chr5	91946126	91947126
chr9	31350583	31351583
chr10	23862267	23863267
chr13	39103359	39104359
chr2	121632273	121633273
chr1	168324536	168325536
chr18	3507360	3508360
chr18	61935918	61936918
chr9	111341024	111342024
chr9	58653444	58654444
chr3	109110015	109111015
chr8	36882760	36883760
chr5	136992152	136993152
chr4	117963538	117964538
chr5	104475501	104476501
chr19	21638320	21639320
chr7	112560089	112561089
chr8	118294591	118295591
chr15	84571698	84572698
chr7	142828803	142829803
chr6	59375890	59376890
chr9	25268143	25269143
chr7	147222117	147223117
chr2	167486616	167487616
chr1	40714476	40715476
chr1	157099274	157100274
chr18	38937427	38938427
chr6	70962372	70963372
chr4	133307102	133308102
chr3	107988719	107989719
chr5	108741260	108742260
chr3	53667543	53668543
chr1	59495674	59496674
chr19	56851168	56852168
chrY	346230	347230
chr11	66719042	66720042
chr4	45030993	45031993
chr10	74852611	74853611
chr18	57722264	57723264
chr9	107259675	107260675
chr7	56136578	56137578
chr15	85007692	85008692
chr1	184271304	184272304
chr13	49776990	49777990
chr7	4452797	4453797
chr5	117956183	117957183
chr18	34697547	34698547
chr2	56976045	56977045
chr6	128429461	128430461
chr9	102686374	102687374
chr12	103195892	103196892
chr6	30846360	30847360
chr15	97794168	97795168
chr11	120165984	120166984
chr9	48668273	48669273
chr18	42739980	42740980
chr10	58753970	58754970
chr3	106896632	106897632
chr19	6363997	6364997
chr19	40905160	40906160
chr3	108002928	108003928
chr7	87487526	87488526
chr1	136547949	136548949
chr4	65265432	65266432
chr1	154948315	154949315
chr13	113098564	113099564
chr7	17460006	17461006
chr4	128601919	128602919
chr1	59269501	59270501
chr2	148700818	148701818
chr7	4453330	4454330
chr1	88421428	88422428
chr3	154542152	154543152
chr5	147499154	147500154
chr16	93543644	93544644
chr5	65140314	65141314
chr10	90522213	90523213
chr2	122293070	122294070
chr17	85189400	85190400
chr7	28070410	28071410
chr13	55172411	55173411
chr8	48828462	48829462
chr10	122231069	122232069
chr11	66737618	66738618
chr2	170072835	170073835
chr10	62130519	62131519
chr9	120842337	120843337
chr12	73212876	73213876
chr9	72960729	72961729
chr7	75273642	75274642
chr5	148671635	148672635
chr3	103177665	103178665
chr1	141318293	141319293
chr12	110003619	110004619
chr4	148473217	148474217
chr8	92902666	92903666
chr4	80673163	80674163
chr7	96670408	96671408
chr4	142610825	142611825
chr7	147949029	147950029
chr16	10088555	10089555
chr10	43475776	43476776
chr12	17541785	17542785
chr17	50609853	50610853
chr15	102008447	102009447
chr6	73317361	73318361
chr16	45684631	45685631
chr4	94734990	94735990
chr4	101039550	101040550
chr10	44248779	44249779
chr4	49334778	49335778
chr7	52437245	52438245
chr4	148376357	148377357
chr6	113962462	113963462
chr1	59268950	59269950
chr10	97956707	97957707
chr7	141918342	141919342
chr11	80100347	80101347
chr15	99530310	99531310
chr12	113005487	113006487
chr15	96173047	96174047
chr17	27109625	27110625
chr3	28679665	28680665
chr10	98113946	98114946
chr4	53171169	53172169
chr15	44270385	44271385
chr5	91629187	91630187
chr10	86487327	86488327
chr11	110398547	110399547
chr2	153434973	153435973
chr4	115403890	115404890
chr5	138663045	138664045
chr10	82363897	82364897
chr13	64262623	64263623
chr13	120217193	120218193
chr7	28337671	28338671
chr10	84348539	84349539
chr11	60917512	60918512
chr2	160447321	160448321
chr9	110183318	110184318
chr1	122161419	122162419
chr8	55614922	55615922
chr14	61143854	61144854
chr4	120887214	120888214
chr5	25211125	25212125
chr16	36040748	36041748
chr12	80713416	80714416
chr17	33391594	33392594
chr9	123169466	123170466
chr10	80023785	80024785
chr6	147188421	147189421
chr4	129865887	129866887
chr11	100406458	100407458
chr10	41402236	41403236
chr9	85642536	85643536
chr3	51004536	51005536
chr2	33342097	33343097
chr11	97176546	97177546
chr6	6198194	6199194
chr7	86293471	86294471
chr17	48138638	48139638
chr2	113663721	113664721
chr18	77952783	77953783
chr5	75552750	75553750
chr5	122160984	122161984
chr5	139624924	139625924
chr5	77270573	77271573
chr2	71205194	71206194
chr8	47084819	47085819
chr1	89142434	89143434
chr10	32032329	32033329
chr2	12340579	12341579
chr3	94963771	94964771
chr1	83742328	83743328
chr3	58484552	58485552
chr10	43790599	43791599
chr7	46971362	46972362
chr2	103264471	103265471
chr7	26576886	26577886
chr13	99068627	99069627
chr19	4206687	4207687
chr4	129923065	129924065
chr13	104434181	104435181
chr8	90722533	90723533
chr14	103468914	103469914
chr13	104450501	104451501
chr5	99586689	99587689
chr5	67738055	67739055
chr6	146380401	146381401
chr5	23808738	23809738
chr5	138377469	138378469
chr1	64494318	64495318
chr4	117609335	117610335
chr4	107435906	107436906
chr1	7387285	7388285
chr9	95975593	95976593
chr7	80567037	80568037
chr1	67125374	67126374
chr15	57966198	57967198
chr4	45618314	45619314
chr6	29463011	29464011
chr1	89094335	89095335
chr18	61941534	61942534
chr5	99681509	99682509
chr12	4578422	4579422
chr12	9008477	9009477
chr14	87540539	87541539
chr18	62339199	62340199
chr7	25161759	25162759
chr3	21659542	21660542
chr13	55291282	55292282
chr2	127095344	127096344
chr15	101352843	101353843
chr4	40649429	40650429
chr12	30567753	30568753
chr7	151305079	151306079
chr11	111384466	111385466
chr15	77711878	77712878
chr8	97778446	97779446
chr12	21378988	21379988
chr6	147949302	147950302
chr10	79635471	79636471
chr11	98902320	98903320
chr17	44393244	44394244
chr1	23833645	23834645
chr2	93578931	93579931
chr15	88919000	88920000
chr5	150125158	150126158
chr3	84089164	84090164
chr4	122727675	122728675
chr14	70000543	70001543
chr7	85972254	85973254
chr12	85401560	85402560
chr15	6964743	6965743
chr17	44215303	44216303
chr15	97497534	97498534
chr5	77783188	77784188
chr9	66616761	66617761
chr3	94246741	94247741
chr7	138703385	138704385
chr12	8980337	8981337
chr12	78195686	78196686
chr15	79073288	79074288
chr15	91403233	91404233
chr1	191796578	191797578
chrX	20239483	20240483
chr3	65666904	65667904
chr8	72690292	72691292
chr7	136450157	136451157
chr4	137262867	137263867
chr5	118604936	118605936
chr1	59466145	59467145
chr3	153498299	153499299
chr7	53303281	53304281
chrY	1752122	1753122
chr17	13658382	13659382
chr19	37624801	37625801
chr17	8056323	8057323
chr6	118511901	118512901
chr4	53172387	53173387
chr17	79335987	79336987
chr2	128926303	128927303
chr8	125841940	125842940
chr5	28796009	28797009
chr4	94392183	94393183
chr6	31348290	31349290
chr17	4974464	4975464
chr6	108722635	108723635
chr18	73649197	73650197
chr11	59778920	59779920
chr19	28085206	28086206
chr4	135154632	135155632
chr5	148569319	148570319
chr8	18935908	18936908
chr6	82602490	82603490
chr8	114534780	114535780
chr18	61008187	61009187
chr9	27106267	27107267
chr17	47505315	47506315
chr6	137079602	137080602
chr9	114492559	114493559
chr12	27744413	27745413
chr13	76193338	76194338
chr4	141448773	141449773
chr7	151093004	151094004
chr3	37379805	37380805
chr6	33415865	33416865
chr8	75873961	75874961
chr1	140476098	140477098
chr17	87922702	87923702
chr2	34494480	34495480
chr11	96771002	96772002
chr5	23605884	23606884
chr1	21156047	21157047
chr16	98303221	98304221
chr6	146773211	146774211
chr11	67341035	67342035
chr7	144628762	144629762
chr11	102853936	102854936
chr14	100358685	100359685
chr2	131317059	131318059
chr12	110240878	110241878
chr8	37554056	37555056
chr19	4755961	4756961
chr1	136453121	136454121
chr11	59652283	59653283
chr6	116213727	116214727
chr13	42670756	42671756
chr2	78628038	78629038
chr2	61549328	61550328
chr11	77743903	77744903
chr16	21165598	21166598
chr18	40378601	40379601
chr6	42594709	42595709
chr6	135493635	135494635
chr17	43366504	43367504
chr4	134409462	134410462
chr7	133343495	133344495
chr16	32419328	32420328
chr3	41394616	41395616
chr16	75592594	75593594
chr10	98991534	98992534
chr15	79638210	79639210
chr7	112729402	112730402
chr11	80164979	80165979
chr18	57084719	57085719
chr2	33537469	33538469
chr2	146337421	146338421
chr6	5595144	5596144
chr1	55083846	55084846
chr15	98462260	98463260
chr16	18119135	18120135
chr5	104692120	104693120
chr6	140229237	140230237
chr8	109084680	109085680
chr15	96664592	96665592
chr11	55202976	55203976
chr5	35917249	35918249
chr11	5661577	5662577
chr6	117775063	117776063
chr9	32503098	32504098
chr9	70269003	70270003
chr4	106144628	106145628
chr13	91363055	91364055
chrX	72942816	72943816
chr1	174562728	174563728
chr1	23235018	23236018
chr3	52267416	52268416
chr19	12669650	12670650
chr13	99086510	99087510
chr5	51797475	51798475
chr8	35103198	35104198
chr3	145735439	145736439
chr12	29273979	29274979
chr3	130614756	130615756
chr10	51852886	51853886
chr19	42007390	42008390
chr10	8838734	8839734
chr1	158488292	158489292
chr12	4849657	4850657
chr14	76549376	76550376
chr1	139794559	139795559
chr11	102889150	102890150
chr12	93115790	93116790
chr19	32804496	32805496
chr4	108292041	108293041
chr11	31613330	31614330
chr17	88725415	88726415
chr13	21559947	21560947
chrY	1793117	1794117
chr4	58726769	58727769
chr1	177561768	177562768
chr2	13192569	13193569
chr11	73037169	73038169
chr2	147633490	147634490
chr5	117737146	117738146
chr6	120306962	120307962
chr7	111348046	111349046
chr9	61874166	61875166
chr16	66086450	66087450
chr4	101029708	101030708
chr1	52806522	52807522
chr14	19065982	19066982
chr16	55965939	55966939
chr9	100346271	100347271
chr11	58166277	58167277
chr13	99788545	99789545
chr8	8660884	8661884
chr6	8036476	8037476
chr7	25149513	25150513
chr15	78672495	78673495
chr12	25359933	25360933
chr3	127704503	127705503
chr8	93593459	93594459
chr1	94802998	94803998
chr12	32238950	32239950
chr4	128295217	128296217
chr5	111209231	111210231
chr9	113554337	113555337
chr16	21204152	21205152
chr2	155755322	155756322
chr5	116294656	116295656
chr9	102681556	102682556
chr3	98027808	98028808
chr8	45541296	45542296
chr2	147563710	147564710
chr13	52753507	52754507
chr2	167363083	167364083
chr10	84219922	84220922
chr3	136370918	136371918
chr8	119779923	119780923
chr10	24358197	24359197
chr14	55259706	55260706
chr3	58460966	58461966
chr7	97129313	97130313
chr12	92661273	92662273
chr18	35699409	35700409
chr11	49714928	49715928
chr17	71608770	71609770
chr18	24112645	24113645
chr4	115319908	115320908
chr4	150090125	150091125
chr7	150692282	150693282
chrX	11243298	11244298
chr14	70025628	70026628
chr11	32104833	32105833
chr3	33854843	33855843
chr5	21151145	21152145
chr5	46738307	46739307
chr9	46080728	46081728
chr2	53049844	53050844
chr2	104332771	104333771
chr10	7815552	7816552
chr10	81326071	81327071
chr15	89041445	89042445
chr19	4942654	4943654
chr10	96838159	96839159
chr11	85166119	85167119
chr11	90278915	90279915
chr11	115424992	115425992
chr16	33195732	33196732
chr19	47806158	47807158
chr1	173340925	173341925
chr15	27849002	27850002
chr18	64266373	64267373
chr2	30554971	30555971
chr6	118369122	118370122
chr6	128374169	128375169
chr19	45284141	45285141
chr4	111558936	111559936
chr5	37500396	37501396
chr13	41174541	41175541
chr3	27837613	27838613
chr9	122940691	122941691
chr10	24359125	24360125
chr16	37682362	37683362
chr3	67233509	67234509
chr6	122258258	122259258
chr10	95207547	95208547
chr16	24464299	24465299
chr5	53422273	53423273
chr5	92950744	92951744
chr13	24853368	24854368
chr3	67371859	67372859
chr3	83981498	83982498
chr4	142464695	142465695
chr14	58189950	58190950
chr6	6905545	6906545
chr5	31865627	31866627
chr12	88430364	88431364
chr5	148740016	148741016
chr1	54495321	54496321
chr18	80243086	80244086
chr11	119803756	119804756
chr7	6192165	6193165
chr2	58968799	58969799
chr4	133330203	133331203
chr6	84183488	84184488
chr3	144062394	144063394
chr13	98800925	98801925
chr14	56822486	56823486
chr2	29745446	29746446
chr3	121577783	121578783
chr8	42871025	42872025
chr18	14840799	14841799
chr1	124253285	124254285
chr12	84184102	84185102
chr16	16358597	16359597
chr2	29682337	29683337
chr3	89534070	89535070
chr9	72255789	72256789
chr13	40817882	40818882
chr14	27353952	27354952
chr3	96568145	96569145
chr5	120162531	120163531
chr9	109833672	109834672
chr1	159015971	159016971
chr4	102986005	102987005
chr7	50721420	50722420
chr8	114515700	114516700
chr3	87826491	87827491
chr1	194548039	194549039
chr12	105855312	105856312
chr5	33677598	33678598
chr6	108659613	108660613
chr1	58561293	58562293
chr13	73740946	73741946
chr18	24363970	24364970
chr1	83155770	83156770
chr14	34772258	34773258
chr5	30446311	30447311
chr11	78510472	78511472
chr5	31796635	31797635
chr8	11700001	11701001
chr2	31770329	31771329
chr18	64269905	64270905
chr4	83268638	83269638
chr4	126288661	126289661
chr19	47805533	47806533
chr11	115063334	115064334
chr18	75978366	75979366
chr4	107743512	107744512
chr1	121289426	121290426
chr14	31764072	31765072
chr18	42748793	42749793
chr17	88090985	88091985
chr11	60267552	60268552
chr7	134655475	134656475
chr10	80554899	80555899
chr9	122025909	122026909
chr3	94946205	94947205
chr4	120689427	120690427
chr1	56596537	56597537
chr11	94903146	94904146
chr18	78320400	78321400
chr7	103667416	103668416
chr12	4299011	4300011
chr11	33062721	33063721
chr6	86387834	86388834
chr11	83633009	83634009
chr3	57651019	57652019
chr5	17079921	17080921
chr1	137326544	137327544
chr5	96831259	96832259
chr19	52449361	52450361
chr1	173043686	173044686
chr9	13693790	13694790
chr1	139109915	139110915
chr11	30853793	30854793
chr11	67857436	67858436
chr4	124035372	124036372
chr16	98243797	98244797
chr1	191865860	191866860
chr15	98364316	98365316
chr15	7554556	7555556
chr17	87556726	87557726
chr7	147680307	147681307
chr16	92697130	92698130
chr6	147708342	147709342
chr19	44322320	44323320
chr11	20699999	20700999
chr1	157624422	157625422
chr15	39692425	39693425
chr11	105927625	105928625
chr16	44016002	44017002
chr1	91839466	91840466
chr9	37062570	37063570
chr2	77179677	77180677
chr4	114320024	114321024
chr9	35074903	35075903
chr11	76015017	76016017
chr11	114626162	114627162
chrX	50264856	50265856
chr4	106134310	106135310
chr5	73038499	73039499
chr1	34658878	34659878
chr5	98448084	98449084
chr7	106773991	106774991
chr8	41888720	41889720
chr11	61861037	61862037
chr13	30077610	30078610
chr5	99783210	99784210
chr2	134469368	134470368
chr15	89185545	89186545
chr4	133898550	133899550
chr1	162722589	162723589
chr18	36098915	36099915
chr3	84975171	84976171
chr8	3392457	3393457
chr1	44186766	44187766
chr11	3813390	3814390
chr2	30797846	30798846
chr11	68245077	68246077
chr12	12330048	12331048
chr1	173407842	173408842
chr10	61108989	61109989
chr11	104411314	104412314
chr15	80501653	80502653
chr8	129654320	129655320
chr1	79577701	79578701
chr2	135264919	135265919
chr3	116564072	116565072
chr6	43293291	43294291
chr8	10634158	10635158
chr15	55070191	55071191
chr7	6893180	6894180
chr7	146433844	146434844
chr1	79757826	79758826
chr5	52523049	52524049
chr18	4352456	4353456
chr7	56500883	56501883
chr7	104519663	104520663
chr8	60278865	60279865
chr12	76927598	76928598
chr13	3373905	3374905
chr3	128869345	128870345
chr1	87831763	87832763
chr13	97777058	97778058
chr6	135394325	135395325
chr8	87643127	87644127
chr8	97125231	97126231
chr1	155034884	155035884
chr13	85328447	85329447
chr16	18686705	18687705
chr7	63049078	63050078
chr7	121285744	121286744
chr12	107247966	107248966
chr3	67436210	67437210
chr4	128560281	128561281
chr11	35547914	35548914
chr15	98307930	98308930
chr17	84652475	84653475
chr19	38739616	38740616
chr5	136542272	136543272
chr1	62746108	62747108
chr3	36450957	36451957
chr5	45884074	45885074
chr8	93594144	93595144
chr3	108854193	108855193
chr2	34261841	34262841
chr3	88329837	88330837
chr4	102786431	102787431
chr16	33561316	33562316
chr11	110925642	110926642
chr3	131270800	131271800
chr4	93001643	93002643
chr5	129513969	129514969
chr8	71587106	71588106
chr18	64777883	64778883
chr4	53321433	53322433
chr5	140894799	140895799
chr12	75417650	75418650
chr19	43645190	43646190
chr13	114584128	114585128
chr4	151656944	151657944
chr5	37132989	37133989
chr17	51318323	51319323
chr2	37307308	37308308
chr5	137434803	137435803
chr8	118272281	118273281
chr14	76690167	76691167
chr4	33105018	33106018
chr11	20300549	20301549
chr15	101227801	101228801
chr2	94018659	94019659
chr6	66845916	66846916
chr7	135175613	135176613
chr13	56260327	56261327
chr15	8118476	8119476
chr15	101676076	101677076
chr19	18909150	18910150
chr4	99680656	99681656
chr12	87070002	87071002
chr1	174480375	174481375
chr12	25335575	25336575
chr5	137408820	137409820
chr9	110959315	110960315
chr11	32247253	32248253
chr11	88684018	88685018
chr12	118771831	118772831
chr15	11925301	11926301
chr17	5937989	5938989
chr18	35821383	35822383
chr8	86879996	86880996
chr2	75574877	75575877
chr9	20837354	20838354
chr11	82728208	82729208
chr15	61814517	61815517
chr2	74892897	74893897
chr18	82934343	82935343
chr11	74184828	74185828
chr13	62567800	62568800
chr17	56896526	56897526
chr18	25645070	25646070
chr2	30319154	30320154
chr5	138414657	138415657
chr9	36604492	36605492
chr15	79572517	79573517
chr8	14992408	14993408
chr19	39134931	39135931
chr2	25477046	25478046
chr10	81166925	81167925
chr9	121194585	121195585
chr1	121317237	121318237
chr12	80273261	80274261
chr4	55017581	55018581
chr5	123299571	123300571
chr4	35122526	35123526
chr12	29436157	29437157
chr13	95638282	95639282
chr4	121870449	121871449
chr17	86544084	86545084
chr3	49828192	49829192
chr6	140248676	140249676
chr1	170362084	170363084
chr15	75534121	75535121
chr19	55667433	55668433
chr7	31064981	31065981
chr7	74344007	74345007
chr10	60514654	60515654
chr12	17544549	17545549
chr13	44452036	44453036
chr9	51572887	51573887
chr10	76880564	76881564
chr11	94538303	94539303
chr12	32082289	32083289
chr15	85035906	85036906
chr3	123140189	123141189
chr4	124428257	124429257
chr11	3734017	3735017
chr17	24769092	24770092
chr4	53319666	53320666
chr3	103082815	103083815
chr8	112741249	112742249
chr16	24313301	24314301
chr12	100645234	100646234
chr2	158478415	158479415
chr5	35447870	35448870
chr5	64202749	64203749
chr6	29477610	29478610
chr10	34016730	34017730
chr11	3308743	3309743
chr13	81803052	81804052
chr15	12297160	12298160
chr5	137437446	137438446
chr11	70795996	70796996
chr18	36101510	36102510
chr19	16404394	16405394
chr2	25193617	25194617
chr4	48485808	48486808
chr4	128779068	128780068
chr9	44059128	44060128
chr10	87841399	87842399
chr11	31849173	31850173
chr13	12302238	12303238
chr7	129394892	129395892
chr8	85855994	85856994
chr16	91081438	91082438
chr3	108003303	108004303
chr4	89141207	89142207
chr6	128998772	128999772
chr12	88177348	88178348
chr1	94791380	94792380
chr1	13579542	13580542
chr1	106936067	106937067
chr13	113597873	113598873
chr17	83614102	83615102
chr13	36345050	36346050
chr2	151907181	151908181
chr15	102206831	102207831
chr8	94325463	94326463
chr1	141350796	141351796
chr12	80292356	80293356
chr15	96337589	96338589
chr17	45388101	45389101
chr2	172765351	172766351
chr6	54917286	54918286
chr1	57029787	57030787
chr2	120454240	120455240
chr1	166975877	166976877
chr1	173048101	173049101
chr10	33739022	33740022
chr14	23397111	23398111
chr14	99802040	99803040
chr18	38906173	38907173
chr2	27370107	27371107
chr3	88281333	88282333
chr3	134961264	134962264
chr5	42235031	42236031
chr8	77736534	77737534
chr9	104298641	104299641
chr10	40602749	40603749
chr15	93228258	93229258
chr4	129373600	129374600
chr8	86760622	86761622
chr13	109004016	109005016
chr11	109099664	109100664
chr12	71162762	71163762
chr6	34242555	34243555
chr10	62891879	62892879
chr15	100836808	100837808
chr6	30804920	30805920
chr1	93390684	93391684
chr2	3391852	3392852
chr6	51158644	51159644
chr8	98411845	98412845
chr9	119489470	119490470
chr13	101172607	101173607
chr15	82101327	82102327
chr4	89142134	89143134
chr11	85657307	85658307
chr13	32994781	32995781
chr2	146047069	146048069
chr13	96622993	96623993
chr4	144908920	144909920
chr1	39648604	39649604
chr10	80450494	80451494
chr11	70264821	70265821
chr13	113825777	113826777
chr16	17722528	17723528
chr4	111564478	111565478
chr10	26491721	26492721
chr12	117500948	117501948
chr13	73402679	73403679
chr19	4838901	4839901
chr2	164232876	164233876
chr17	34462087	34463087
chr18	66428709	66429709
chr6	22050689	22051689
chr6	141100597	141101597
chr8	3386945	3387945
chr9	35377335	35378335
chr10	24473005	24474005
chr11	118883799	118884799
chr15	82817842	82818842
chr18	7701762	7702762
chr19	18705888	18706888
chr4	83633028	83634028
chr6	114200020	114201020
chr8	14089877	14090877
chr9	86342913	86343913
chr3	91951045	91952045
chr1	36121439	36122439
chr3	144508370	144509370
chr4	46614319	46615319
chr4	154487448	154488448
chr12	75065009	75066009
chr16	5255688	5256688
chr1	59754386	59755386
chr10	81063255	81064255
chr12	82208472	82209472
chr12	86559830	86560830
chr17	87929490	87930490
chr17	13733391	13734391
chr1	179638356	179639356
chr10	53795141	53796141
chr4	16090691	16091691
chr12	55357461	55358461
chr17	31397088	31398088
chr18	24688176	24689176
chr3	55030478	55031478
chr3	118264497	118265497
chr8	47845772	47846772
chr12	105304204	105305204
chr2	131997359	131998359
chr3	100720400	100721400
chr9	7763477	7764477
chr1	64168444	64169444
chr14	47323598	47324598
chr17	48741535	48742535
chr2	127008244	127009244
chr8	114456099	114457099
chr2	38781804	38782804
chr4	139090673	139091673
chr16	18083113	18084113
chr10	93497604	93498604
chr14	75071915	75072915
chr15	82751195	82752195
chr6	112323853	112324853
chr8	125243938	125244938
chr13	40938530	40939530
chr4	149655143	149656143
chr5	34011879	34012879
chr16	44620387	44621387
chr3	98030799	98031799
chr12	55514896	55515896
chr18	24236516	24237516
chr3	108247655	108248655
chr1	180204988	180205988
chr17	25715554	25716554
chr17	88035416	88036416
chr17	88071292	88072292
chr2	29201800	29202800
chr5	3647488	3648488
chr7	121835561	121836561
chr8	73024491	73025491
chr14	66544179	66545179
chr9	108362336	108363336
chr7	4989265	4990265
chr3	82707462	82708462
chr3	127161607	127162607
chr10	80118874	80119874
chr11	30671222	30672222
chr11	119051428	119052428
chr16	97493574	97494574
chr7	86068855	86069855
chr9	116190360	116191360
chr19	46647281	46648281
chr3	96023176	96024176
chr15	61946105	61947105
chr17	47930026	47931026
chr3	41397696	41398696
chr3	61139803	61140803
chr8	8733489	8734489
chr1	90116635	90117635
chr11	58215318	58216318
chr11	83663092	83664092
chr12	73765297	73766297
chr2	150735091	150736091
chr4	124334256	124335256
chr7	135488108	135489108
chr8	112261124	112262124
chr9	37270014	37271014
chr18	88939582	88940582
chr7	123751662	123752662
chr8	107821059	107822059
chr4	138101871	138102871
chr5	23670345	23671345
chr13	118390687	118391687
chr11	59263052	59264052
chr14	80439414	80440414
chr6	113256090	113257090
chr12	37440279	37441279
chr13	49544489	49545489
chr16	32484051	32485051
chr3	40905635	40906635
chr5	104762051	104763051
chr10	57717686	57718686
chr3	19062543	19063543
chr14	67491868	67492868
chr19	32922256	32923256
chr8	72397718	72398718
chr1	93194348	93195348
chr10	127895766	127896766
chr13	39021400	39022400
chr13	107726580	107727580
chr15	32119879	32120879
chr2	162756370	162757370
chr1	23769326	23770326
chr1	174342022	174343022
chr10	20908464	20909464
chr15	79297010	79298010
chr3	61167995	61168995
chr5	102129241	102130241
chr7	75514264	75515264
chr6	13627548	13628548
chr16	98302709	98303709
chr3	37210990	37211990
chr14	20569969	20570969
chr17	22451405	22452405
chr2	172807916	172808916
chr9	104241530	104242530
chr10	92754261	92755261
chr6	6947150	6948150
chr7	52147584	52148584
chr7	118265881	118266881
chr11	51780621	51781621
chr2	130731728	130732728
chr7	16637797	16638797
chr14	33294938	33295938
chr16	17201095	17202095
chr2	132310883	132311883
chr10	126394490	126395490
chr15	37362146	37363146
chr8	47295306	47296306
chr9	62828311	62829311
chr11	62569965	62570965
chr5	42098530	42099530
chr5	64460960	64461960
chr14	18491177	18492177
chr5	126320977	126321977
chr10	66315682	66316682
chr15	102033475	102034475
chr18	64114995	64115995
chr2	128189681	128190681
chr4	149049723	149050723
chr6	29114167	29115167
chr8	74446150	74447150
chr1	184494566	184495566
chr10	25078647	25079647
chr11	96482178	96483178
chr12	75110084	75111084
chr12	100644850	100645850
chr12	110232563	110233563
chr14	55082448	55083448
chr4	41660093	41661093
chr4	59047512	59048512
chr4	137771980	137772980
chr8	87959318	87960318
chr9	50975786	50976786
chr17	30635034	30636034
chr11	84242769	84243769
chr12	101369583	101370583
chr2	151934812	151935812
chr2	165354289	165355289
chr7	120063069	120064069
chr8	24913036	24914036
chrX	121263798	121264798
chr1	173309721	173310721
chr11	106772252	106773252
chr5	31077112	31078112
chr16	33196356	33197356
chr16	42955200	42956200
chr8	112089186	112090186
chr5	150040344	150041344
chr1	165709274	165710274
chr18	42738995	42739995
chr2	135783198	135784198
chr2	157971679	157972679
chr6	92190880	92191880
chr12	78289832	78290832
chr12	8818092	8819092
chr14	122580450	122581450
chr19	17602925	17603925
chr3	83938967	83939967
chr11	43596933	43597933
chr2	146040191	146041191
chr5	75356052	75357052
chr4	55362207	55363207
chr4	116136363	116137363
chr4	155243128	155244128
chr7	28258166	28259166
chr3	38119553	38120553
chr6	119797771	119798771
chr13	69782956	69783956
chr4	33092754	33093754
chr4	154010750	154011750
chr14	65995075	65996075
chr12	11156669	11157669
chr12	83801587	83802587
chr16	39048731	39049731
chr5	148130914	148131914
chr1	107676760	107677760
chr10	45297133	45298133
chr13	43879947	43880947
chr5	129602088	129603088
chr6	40385700	40386700
chr9	31682846	31683846
chr9	37338123	37339123
chr12	77296677	77297677
chr5	8667598	8668598
chr5	111759172	111760172
chr1	155741778	155742778
chr1	188855381	188856381
chr13	49066130	49067130
chr4	147412460	147413460
chr5	115168752	115169752
chr14	54257024	54258024
chr18	39049590	39050590
chr2	155554622	155555622
chr10	39861623	39862623
chr11	83663587	83664587
chr11	96777382	96778382
chr19	29585994	29586994
chr19	38797170	38798170
chr19	46072324	46073324
chr3	107159733	107160733
chr4	129419159	129420159
chr6	83391170	83392170
chr8	93657592	93658592
chr9	70803061	70804061
chrX	53259410	53260410
chr12	26062591	26063591
chr18	67247417	67248417
chr2	157070412	157071412
chr9	50969548	50970548
chr13	110566000	110567000
chr16	25407193	25408193
chr14	104425999	104426999
chr19	18804489	18805489
chr7	87133296	87134296
chr9	32008110	32009110
chr10	58137989	58138989
chr11	101072928	101073928
chr4	3340706	3341706
chr6	83640002	83641002
chr9	40564167	40565167
chr13	12612188	12613188
chr18	69667120	69668120
chr2	127412418	127413418
chr11	102786000	102787000
chr11	117180899	117181899
chr11	113158795	113159795
chr17	13375217	13376217
chr10	60861830	60862830
chr13	103434658	103435658
chr2	127409887	127410887
chr8	4656278	4657278
chr1	167693348	167694348
chr7	97574433	97575433
chr11	101901183	101902183
chr1	74819378	74820378
chr16	29813790	29814790
chr18	21280150	21281150
chr2	84729788	84730788
chr5	99262477	99263477
chr5	120565959	120566959
chr6	120488758	120489758
chr18	47603209	47604209
chr11	43307208	43308208
chr15	95597935	95598935
chr4	69925900	69926900
chr9	42003507	42004507
chr9	66158950	66159950
chr11	20530912	20531912
chr17	26249732	26250732
chr19	29715247	29716247
chr5	141438659	141439659
chr7	35460883	35461883
chr8	47396220	47397220
chr11	22517209	22518209
chr12	66018388	66019388
chr14	21553359	21554359
chr16	24469138	24470138
chr2	4514167	4515167
chr2	91767726	91768726
chr2	173411803	173412803
chr9	46450512	46451512
chr1	40737748	40738748
chr6	54631237	54632237
chr1	87904083	87905083
chr1	152975767	152976767
chr1	195378183	195379183
chr18	9865393	9866393
chr18	73401827	73402827
chr2	90452075	90453075
chr13	65379649	65380649
chr18	74683956	74684956
chr9	21960755	21961755
chr15	93148924	93149924
chr1	89368868	89369868
chr12	4823722	4824722
chr18	34490319	34491319
chr18	62090968	62091968
chr2	18742979	18743979
chr2	145525118	145526118
chrX	160513998	160514998
chr11	59652871	59653871
chr18	37803380	37804380
chr4	138252372	138253372
chr12	118697703	118698703
chr5	73030997	73031997
chr11	115336451	115337451
chr4	55617471	55618471
chr4	147965069	147966069
chr5	145015019	145016019
chr1	121912509	121913509
chr12	29515601	29516601
chr8	26154320	26155320
chr1	129293765	129294765
chr12	55669257	55670257
chr3	27135861	27136861
chr7	151282922	151283922
chr8	27268080	27269080
chr9	123697981	123698981
chr12	33741830	33742830
chr12	70397214	70398214
chr18	74561740	74562740
chr2	94130364	94131364
chr2	155417999	155418999
chr4	129875907	129876907
chr5	142876940	142877940
chr6	140902063	140903063
chr8	92308594	92309594
chr9	105519294	105520294
chr10	40021602	40022602
chr17	46909257	46910257
chr5	137774297	137775297
chr6	11875362	11876362
chr6	67073811	67074811
chr8	37312063	37313063
chr2	105744204	105745204
chr10	5724917	5725917
chr12	17259550	17260550
chr14	80060627	80061627
chr2	31114148	31115148
chr4	14753175	14754175
chr4	19827955	19828955
chr5	96412501	96413501
chr13	94562913	94563913
chr4	116923998	116924998
chr5	100858154	100859154
chr7	108986401	108987401
chr8	23147195	23148195
chr8	86296646	86297646
chr9	119310647	119311647
chr5	51817283	51818283
chr13	62725042	62726042
chr1	20809999	20810999
chr10	79908703	79909703
chr12	12806636	12807636
chr4	98942898	98943898
chr12	78278484	78279484
chr11	58660092	58661092
chr11	94426181	94427181
chr13	112308257	112309257
chr2	169880597	169881597
chr1	58026455	58027455
chr11	17157146	17158146
chr15	25567210	25568210
chr7	114738100	114739100
chr8	46495976	46496976
chr7	125272721	125273721
chr1	107710685	107711685
chr10	82682153	82683153
chr9	99138266	99139266
chr1	180335327	180336327
chr10	44819945	44820945
chr10	69557342	69558342
chr15	68090041	68091041
chr16	88667150	88668150
chr18	47529591	47530591
chr19	34574958	34575958
chr2	71556869	71557869
chr7	97624160	97625160
chr8	129855370	129856370
chr15	67305589	67306589
chr16	43211720	43212720
chr17	46464593	46465593
chr9	62188481	62189481
chr1	120777195	120778195
chr13	48877832	48878832
chr17	35530449	35531449
chr1	95669926	95670926
chr11	103624537	103625537
chr17	5940876	5941876
chr17	36393835	36394835
chr17	79280811	79281811
chr2	70893302	70894302
chr6	34296273	34297273
chr6	135335427	135336427
chr9	103109805	103110805
chr11	58164393	58165393
chr4	124613629	124614629
chr2	113216851	113217851
chr2	164214995	164215995
chr3	87420823	87421823
chr3	101099107	101100107
chr7	29096601	29097601
chr9	72017401	72018401
chr12	109995693	109996693
chr7	87171457	87172457
chr19	45510241	45511241
chr17	45539894	45540894
chr5	74673440	74674440
chr10	18463085	18464085
chr17	24387953	24388953
chr2	162796998	162797998
chr4	86502799	86503799
chr9	54524001	54525001
chr5	125048202	125049202
chr16	38902052	38903052
chr6	136978315	136979315
chr6	140872821	140873821
chr8	49101565	49102565
chr10	111409215	111410215
chr11	106781505	106782505
chr17	45903594	45904594
chr5	48373849	48374849
chr9	106724439	106725439
chr2	165794606	165795606
chr3	21884728	21885728
chr8	59990018	59991018
chr11	61863805	61864805
chr12	8927931	8928931
chr12	100388011	100389011
chr16	13436835	13437835
chr8	118290047	118291047
chr4	138153423	138154423
chr9	97072218	97073218
chr1	90602052	90603052
chr13	24852846	24853846
chr19	10005329	10006329
chr4	49644338	49645338
chrX	157836728	157837728
chr2	68622499	68623499
chr7	143959687	143960687
chr9	110905606	110906606
chr11	40071080	40072080
chr17	29985490	29986490
chr4	153515977	153516977
chr14	47915586	47916586
chr16	10656754	10657754
chr2	45364855	45365855
chr3	63659246	63660246
chr3	99965932	99966932
chr7	26180545	26181545
chr10	40738394	40739394
chr12	31941045	31942045
chr4	33316382	33317382
chr5	126315431	126316431
chr9	31349094	31350094
chr9	104171498	104172498
chr16	18127070	18128070
chr2	92885353	92886353
chr5	91633352	91634352
chr6	29866483	29867483
chr5	114758708	114759708
chr1	172892121	172893121
chr11	101771273	101772273
chr15	84981495	84982495
chr1	39535167	39536167
chr1	88165216	88166216
chr1	120285434	120286434
chr11	69394548	69395548
chr11	106873541	106874541
chr13	13682121	13683121
chr13	99789680	99790680
chr7	53190179	53191179
chr9	121280293	121281293
chr7	86878932	86879932
chr9	103014369	103015369
chr10	90524827	90525827
chr10	107377890	107378890
chr11	5661939	5662939
chr13	6546832	6547832
chr14	35047887	35048887
chr15	31153581	31154581
chr15	97923325	97924325
chr16	87796722	87797722
chr17	46865676	46866676
chr2	153168066	153169066
chr3	28487906	28488906
chr4	35898675	35899675
chr4	97988629	97989629
chr9	99336637	99337637
chr1	3504551	3505551
chr10	77829406	77830406
chr12	74077378	74078378
chr13	93253474	93254474
chr2	130968082	130969082
chr1	137649236	137650236
chr11	4773442	4774442
chr12	70683558	70684558
chr4	129373306	129374306
chr4	155609571	155610571
chr5	110605057	110606057
chr4	42962115	42963115
chr1	165492099	165493099
chr19	25619883	25620883
chr1	74432951	74433951
chr1	107787357	107788357
chr13	41111140	41112140
chr6	135117623	135118623
chr7	142823135	142824135
chr8	112302033	112303033
chr15	5408796	5409796
chr3	121114051	121115051
chr1	130488461	130489461
chr10	75260832	75261832
chr11	43742478	43743478
chr12	21548816	21549816
chr14	57463068	57464068
chr16	75826946	75827946
chr17	46520088	46521088
chr18	42629323	42630323
chr19	5294933	5295933
chr3	85774425	85775425
chr5	30949779	30950779
chr8	73277966	73278966
chr11	98126021	98127021
chr17	47729833	47730833
chr8	129662747	129663747
chr1	107210431	107211431
chr10	26093426	26094426
chr13	96159851	96160851
chr14	56097610	56098610
chr14	56158632	56159632
chr2	49205053	49206053
chr2	103668789	103669789
chr6	7794152	7795152
chr6	33009849	33010849
chr9	104263621	104264621
chr4	137417612	137418612
chr7	20043654	20044654
chr7	114931462	114932462
chr15	61281468	61282468
chr4	86477528	86478528
chr5	140267472	140268472
chr6	57500935	57501935
chr6	121059990	121060990
chr7	97590806	97591806
chr7	106807566	106808566
chr15	38174280	38175280
chr15	79757737	79758737
chr15	99200420	99201420
chr19	40345642	40346642
chr2	143664156	143665156
chr10	77531488	77532488
chr10	77647448	77648448
chr15	57743216	57744216
chr16	4333078	4334078
chr18	12899259	12900259
chr19	53674024	53675024
chr4	124791533	124792533
chr5	122553904	122554904
chr1	184312864	184313864
chr3	87214768	87215768
chr4	111558242	111559242
chr8	112669126	112670126
chr15	102073561	102074561
chr2	31396811	31397811
chr3	88351736	88352736
chr5	65590426	65591426
chr6	42330104	42331104
chr17	45615108	45616108
chr2	31993097	31994097
chr1	59268220	59269220
chr1	195369196	195370196
chr11	57362109	57363109
chr13	97822265	97823265
chr16	30423839	30424839
chr16	45944839	45945839
chr2	140220562	140221562
chr3	97485475	97486475
chr4	86519703	86520703
chr4	148423389	148424389
chr8	111410221	111411221
chr1	185857707	185858707
chr14	55495202	55496202
chr16	48412062	48413062
chr2	150611934	150612934
chr2	152560314	152561314
chr7	71131481	71132481
chr1	161161833	161162833
chr11	52110549	52111549
chr11	103029629	103030629
chr12	36941379	36942379
chr13	62484162	62485162
chr2	154125979	154126979
chr2	156104078	156105078
chr2	160404143	160405143
chr8	36219039	36220039
chr1	89744817	89745817
chr12	114135685	114136685
chr15	66848882	66849882
chr16	31508776	31509776
chr3	95160658	95161658
chr9	44225596	44226596
chr3	94845973	94846973
chr4	89189964	89190964
chr4	122938696	122939696
chr7	139743100	139744100
chr9	105759829	105760829
chr12	112591315	112592315
chr16	91646752	91647752
chr18	66200532	66201532
chr18	77844875	77845875
chr2	59720072	59721072
chr2	92215039	92216039
chr2	119307739	119308739
chr4	89019363	89020363
chr4	149180528	149181528
chr5	122110055	122111055
chr7	35880002	35881002
chr7	82537302	82538302
chr7	120521097	120522097
chr10	28107306	28108306
chr10	93610119	93611119
chr15	89421809	89422809
chr19	5272723	5273723
chr1	67243638	67244638
chr14	45838669	45839669
chr7	16806952	16807952
chr7	90014247	90015247
chr9	35007074	35008074
chr3	51902876	51903876
chr4	83830416	83831416
chr1	188528700	188529700
chr11	20693885	20694885
chr14	25028878	25029878
chr14	34026641	34027641
chr3	49829713	49830713
chr7	28964556	28965556
chr8	74899879	74900879
chr1	59268627	59269627
chr11	68379647	68380647
chr16	36827944	36828944
chr16	93883571	93884571
chr2	25283649	25284649
chr6	116623637	116624637
chr6	135202431	135203431
chr7	74313491	74314491
chr9	105396952	105397952
chr6	122506678	122507678
chr9	56483751	56484751
chr12	101842445	101843445
chr2	102026104	102027104
chr7	144085665	144086665
chr9	66185653	66186653
chr2	25401935	25402935
chr4	98584543	98585543
chr6	54314538	54315538
chr6	54346723	54347723
chr8	74738637	74739637
chr17	88928857	88929857
chr7	97460674	97461674
chr9	120049441	120050441
chr1	193915943	193916943
chr11	72990118	72991118
chr13	99469633	99470633
chr16	30959441	30960441
chr2	113688653	113689653
chr8	24318396	24319396
chr19	10092179	10093179
chr1	61433653	61434653
chr2	127509366	127510366
chr6	133055208	133056208
chr7	75725228	75726228
chr9	64472062	64473062
chr1	137436544	137437544
chr14	79986604	79987604
chr1	106937931	106938931
chr11	20694330	20695330
chr13	101661817	101662817
chr16	93608682	93609682
chr3	21885181	21886181
chr5	130639245	130640245
chr5	137896797	137897797
chr6	148302631	148303631
chr1	7387768	7388768
chr16	18108081	18109081
chr6	39327186	39328186
chr6	97422611	97423611
chr1	15909835	15910835
chr1	66863707	66864707
chr10	84084544	84085544
chr17	85502353	85503353
chr18	12326656	12327656
chr4	137990007	137991007
chr8	86145865	86146865
chr3	68829730	68830730
chr9	62695232	62696232
chr12	33998653	33999653
chr3	143265360	143266360
chr6	24614639	24615639
chr7	31961895	31962895
chr11	26861267	26862267
chr11	117245912	117246912
chr4	103891108	103892108
chr7	87519957	87520957
chr7	142594835	142595835
chr8	107508553	107509553
chr9	14503166	14504166
chr16	91372516	91373516
chr9	71679288	71680288
chr16	36597998	36598998
chr17	35315159	35316159
chr3	31103814	31104814
chr5	103690125	103691125
chr5	110771569	110772569
chr6	126889146	126890146
chr14	55482501	55483501
chr18	44539659	44540659
chr7	133844299	133845299
chr8	13494031	13495031
chr9	54407581	54408581
chr10	6011553	6012553
chr14	8598103	8599103
chr14	121778146	121779146
chr15	77327604	77328604
chr2	14179712	14180712
chr4	122757726	122758726
chr5	63157020	63158020
chr9	118714540	118715540
chr1	57906422	57907422
chr1	184889933	184890933
chr11	62271416	62272416
chr12	8494791	8495791
chr19	42329669	42330669
chr2	118860081	118861081
chr2	167830741	167831741
chr4	73897257	73898257
chr4	118188943	118189943
chr4	134994802	134995802
chr5	138704736	138705736
chr8	23421647	23422647
chr9	77983679	77984679
chr10	75146466	75147466
chr2	34501531	34502531
chr4	122612367	122613367
chr9	105041177	105042177
chr15	89063719	89064719
chr1	43479876	43480876
chr13	6575059	6576059
chr13	96661504	96662504
chr14	22800346	22801346
chr15	73554685	73555685
chr16	17489231	17490231
chr16	76242811	76243811
chr4	44246457	44247457
chr5	118694641	118695641
chr5	138069623	138070623
chr7	86373060	86374060
chr1	163125823	163126823
chr1	183309468	183310468
chr12	12799862	12800862
chr5	35291606	35292606
chr6	128500982	128501982
chr7	112663376	112664376
chr17	22362218	22363218
chr18	82737366	82738366
chr19	24489968	24490968
chr5	114625381	114626381
chr9	62980275	62981275
chr5	147887646	147888646
chr10	94453813	94454813
chr12	118688293	118689293
chr2	3035143	3036143
chr11	22720911	22721911
chr15	57692672	57693672
chr16	15863005	15864005
chr18	61453178	61454178
chr19	45005033	45006033
chr2	151367742	151368742
chr3	131227283	131228283
chr4	6274088	6275088
chr9	25058871	25059871
chr11	85165667	85166667
chr4	134090786	134091786
chr2	93586450	93587450
chr1	34489672	34490672
chr1	40142244	40143244
chr1	133554341	133555341
chr10	6401998	6402998
chr13	120201617	120202617
chr4	62875882	62876882
chr6	58974105	58975105
chr15	3945407	3946407
chr19	42203117	42204117
chr6	114963276	114964276
chr7	123647305	123648305
chr2	72818153	72819153
chr19	40686322	40687322
chr11	32997557	32998557
chr3	115590364	115591364
chr3	118131154	118132154
chr3	146006279	146007279
chr9	40443843	40444843
chr10	62382890	62383890
chr12	70269005	70270005
chr18	65172795	65173795
chr6	72943021	72944021
chr6	128250057	128251057
chr8	113823734	113824734
chr11	17111434	17112434
chr10	94086027	94087027
chr5	44659452	44660452
chr1	140471922	140472922
chr1	155248546	155249546
chr1	180456954	180457954
chr13	62861534	62862534
chr15	96766877	96767877
chr16	90412811	90413811
chr17	29484394	29485394
chr19	39187834	39188834
chr2	129122502	129123502
chr2	131735215	131736215
chr2	153620565	153621565
chr3	94945846	94946846
chr5	123865839	123866839
chr7	138553640	138554640
chr8	122929542	122930542
chrX	51379789	51380789
chr19	46673008	46674008
chr10	83977910	83978910
chr11	119874111	119875111
chr13	54472624	54473624
chr13	111879257	111880257
chr14	73845414	73846414
chr15	43308177	43309177
chr18	24364495	24365495
chr19	44493179	44494179
chr5	144735844	144736844
chr9	110773217	110774217
chr13	95055239	95056239
chr14	26886443	26887443
chr14	28241516	28242516
chr14	55083119	55084119
chr14	77185790	77186790
chr15	61770598	61771598
chr16	62786110	62787110
chr17	23012946	23013946
chr2	164417259	164418259
chr9	54828671	54829671
chr11	53520321	53521321
chr18	66161861	66162861
chr15	57431826	57432826
chr17	75209870	75210870
chr1	23389681	23390681
chr10	21546321	21547321
chr10	92987737	92988737
chr10	110446274	110447274
chr13	67626676	67627676
chr18	70689413	70690413
chr2	34654810	34655810
chr2	165604115	165605115
chr3	51954765	51955765
chr4	106964573	106965573
chr5	137437749	137438749
chr6	83275829	83276829
chr7	97248948	97249948
chr8	42900366	42901366
chr9	77764650	77765650
chr9	114997073	114998073
chr1	62617534	62618534
chr11	63077573	63078573
chr7	125603160	125604160
chr11	20590755	20591755
chr15	101368326	101369326
chr16	10846304	10847304
chr18	77285302	77286302
chr7	111654932	111655932
chr8	123157895	123158895
chr1	107890113	107891113
chr13	104710738	104711738
chr15	102033974	102034974
chr4	89026668	89027668
chr6	95668351	95669351
chr6	112896792	112897792
chr17	43803609	43804609
chr2	31238181	31239181
chr2	58329036	58330036
chr3	101016785	101017785
chr4	122931492	122932492
chr1	55293492	55294492
chr1	108324426	108325426
chr10	8651030	8652030
chr11	20691062	20692062
chr14	33201102	33202102
[truncated: 50,400 more rows]

## Sheet: All GF HNF4A regions
Supplemental Table S8: GF HNF4A sites (related to Fig. 4 and Supplemental Fig. S6)
GF HNF4A regions used for alignments in Fig. 4
chr12	3109452	3110452
chr13	77577716	77578716
chr9	35112487	35113487
chr6	103598697	103599697
chr2	98502322	98503322
chr4	70038702	70039702
chr2	98503570	98504570
chr2	98504716	98505716
chr9	2999940	3000940
chr12	75904790	75905790
chr14	86598353	86599353
chr7	39310080	39311080
chr11	2999977	3000977
chrX	166526826	166527826
chr8	75843097	75844097
chrY	2651758	2652758
chr12	68159970	68160970
chr16	93788985	93789985
chr9	115259495	115260495
chr6	142885782	142886782
chr16	12711403	12712403
chr14	69779606	69780606
chr8	86280336	86281336
chr9	95325900	95326900
chr19	61275165	61276165
chr14	9118729	9119729
chr17	13498451	13499451
chr4	31280881	31281881
chr1	90184296	90185296
chr3	148715275	148716275
chr5	93718212	93719212
chr2	57481458	57482458
chr17	13743461	13744461
chr3	56378994	56379994
chr18	40467377	40468377
chr19	61299298	61300298
chr17	68090245	68091245
chr18	3004419	3005419
chr16	3115842	3116842
chr4	93510647	93511647
chr1	107076045	107077045
chr9_random	241886	242886
chr5	147072250	147073250
chr1	197067425	197068425
chrX	73843868	73844868
chr1_random	272200	273200
chr2	56592332	56593332
chr4	3016866	3017866
chr2	91933385	91934385
chr2	22599895	22600895
chr4	3017629	3018629
chr3	87228594	87229594
chr16	11143704	11144704
chr6	29698019	29699019
chr6	35791734	35792734
chr11	53953610	53954610
chr2	110133319	110134319
chr17	53291416	53292416
chrX	166432292	166433292
chr10	21861745	21862745
chr11	115309146	115310146
chr16	30829169	30830169
chr1	91398141	91399141
chr13	3371939	3372939
chr17	3076362	3077362
chr3	5860151	5861151
chrX	166426924	166427924
chr5	143685897	143686897
chr16	3349750	3350750
chr11	58424553	58425553
chr9	123370603	123371603
chr16	3114644	3115644
chr3	100119910	100120910
chr14	48248670	48249670
chr18	14261336	14262336
chr15	97711518	97712518
chr2	181665527	181666527
chr4	119851543	119852543
chr11	57613570	57614570
chr8	114245283	114246283
chr11	108872650	108873650
chr6	83372002	83373002
chr16	76453709	76454709
chr15	85535642	85536642
chr13	97960042	97961042
chr16	57391156	57392156
chr11	83830254	83831254
chr4_random	142704	143704
chr17	24125704	24126704
chr2	181652015	181653015
chr1	124253293	124254293
chr6	49185999	49186999
chr11	118967356	118968356
chr15	85584349	85585349
chr9	102685205	102686205
chr15	76023965	76024965
chr16	17221983	17222983
chr8	87513057	87514057
chr12	53548856	53549856
chr4	3016410	3017410
chr6	39193381	39194381
chr3	108517439	108518439
chr9	110183321	110184321
chr17	36368005	36369005
chr2	27403895	27404895
chr2	76349992	76350992
chr4	138559694	138560694
chr8	73321326	73322326
chr2	5299873	5300873
chr10	11211448	11212448
chr16	63311949	63312949
chr5	143671068	143672068
chr9	102890465	102891465
chr6	84836182	84837182
chr16	58519610	58520610
chr16	3350912	3351912
chr9	56071125	56072125
chr12	113367982	113368982
chr2	62289345	62290345
chr5	120126023	120127023
chr9	121966626	121967626
chr2	50004737	50005737
chr12	86453995	86454995
chr3	87312669	87313669
chr14	69932206	69933206
chr11	115738269	115739269
chr11	120477951	120478951
chr8	60128451	60129451
chr1	193463672	193464672
chr1	34179323	34180323
chr1	13277380	13278380
chr4	114077949	114078949
chr15	100251835	100252835
chr11	94019364	94020364
chr10	66383515	66384515
chr18	65116420	65117420
chr11	77014238	77015238
chr15	76372679	76373679
chr1	156904457	156905457
chr3	89081769	89082769
chr17	64591996	64592996
chrX	109484165	109485165
chr12	77576769	77577769
chr14	21049038	21050038
chr3	101310535	101311535
chr5	33079772	33080772
chr11	79584760	79585760
chr19	4816812	4817812
chr12	40618560	40619560
chr2	90281605	90282605
chr6	3150592	3151592
chr6	54176726	54177726
chr3	109380875	109381875
chr9	98390381	98391381
chr12	21162524	21163524
chr15	10819803	10820803
chr1	134022090	134023090
chr8	126497103	126498103
chr5	106131312	106132312
chr2	75542756	75543756
chr18	74899203	74900203
chr16	24365875	24366875
chr7	109131057	109132057
chr17	29716368	29717368
chr7	107643148	107644148
chr4	132315902	132316902
chr12	81233108	81234108
chr6	50308239	50309239
chr5	91328029	91329029
chr8	3753947	3754947
chr8	90733479	90734479
chr18	50288039	50289039
chr12	78298967	78299967
chr11	69510621	69511621
chr18	8935239	8936239
chr4	137904321	137905321
chr8	122965211	122966211
chr7	16618162	16619162
chr1	75120807	75121807
chr2	25078962	25079962
chr15	76526126	76527126
chr18	36685560	36686560
chr6	91409115	91410115
chr11	20232796	20233796
chr12	79451472	79452472
chr11	53570782	53571782
chr16	34029467	34030467
chr11	78107728	78108728
chr1	90149811	90150811
chr6	53985226	53986226
chr5	31246390	31247390
chr7	129362612	129363612
chr19	5493932	5494932
chr13	35057264	35058264
chr13	37741047	37742047
chr17	86831899	86832899
chr15	75684138	75685138
chr19	21568254	21569254
chr17	6931963	6932963
chr6	55287622	55288622
chr4	53329251	53330251
chr16	21865044	21866044
chr13	31270834	31271834
chr5	37089215	37090215
chr18	60906021	60907021
chr4	119332218	119333218
chr7	137977563	137978563
chr4	98062547	98063547
chr3	61962621	61963621
chr17	29186694	29187694
chr11	98307492	98308492
chr2	119054139	119055139
chr15	32156458	32157458
chr14	51617460	51618460
chr8	46412105	46413105
chr12	8541386	8542386
chr11	66849445	66850445
chr3	129281420	129282420
chr15	81661297	81662297
chr12	118914412	118915412
chr9	46034891	46035891
chr14	73773769	73774769
chr7	86879088	86880088
chr2	27541562	27542562
chr11	119960277	119961277
chr12	114350443	114351443
chr17	4920801	4921801
chr12	102013618	102014618
chr2	33219151	33220151
chr14	57222944	57223944
chr18	65135837	65136837
chr18	12805991	12806991
chr13	35055467	35056467
chr19	34681679	34682679
chr17	3245016	3246016
chr15	38489574	38490574
chr11	120878755	120879755
chr11	94494021	94495021
chr6	124327224	124328224
chr5	96824710	96825710
chr10	3153882	3154882
chr4	148277283	148278283
chr3	145860028	145861028
chr3	157656042	157657042
chr13	41923409	41924409
chr9	101155170	101156170
chr2	27526806	27527806
chr9	108027066	108028066
chr12	113053312	113054312
chr2	152631488	152632488
chr1	22562272	22563272
chr4	141122806	141123806
chr10	79519040	79520040
chr14	76966797	76967797
chr7	97208805	97209805
chr12	113555111	113556111
chr17	24119596	24120596
chr11	76834955	76835955
chr8	84939126	84940126
chr6	125330532	125331532
chr7	26400365	26401365
chr8	46407992	46408992
chr12	78598901	78599901
chr19	4056052	4057052
chr14	26312999	26313999
chr15	83282454	83283454
chr4	141284853	141285853
chr8	86058365	86059365
chr2	128535964	128536964
chr1	184198164	184199164
chr11	98287570	98288570
chrX	163489760	163490760
chr14	9208658	9209658
chr3	101472595	101473595
chr7	91298877	91299877
chr7	148525649	148526649
chr7	126811074	126812074
chr7	150937701	150938701
chr10	78995584	78996584
chr5	89061211	89062211
chr11	69177566	69178566
chr6	66853518	66854518
chr7	130609263	130610263
chr7	26176814	26177814
chr1	138465821	138466821
chr4	3866027	3867027
chr9	66545268	66546268
chr9	85014302	85015302
chr4	106291201	106292201
chr3	101199671	101200671
chr14	31448395	31449395
chr6	128610957	128611957
chr5	92632865	92633865
chr8	125947096	125948096
chr7	4121556	4122556
chr4	148159777	148160777
chr11	61132435	61133435
chr1	39243556	39244556
chr19	57477961	57478961
chr19	44137940	44138940
chr9	121780837	121781837
chr11	69190957	69191957
chr17	65966046	65967046
chr13	74453867	74454867
chr17	24174202	24175202
chr12	94815053	94816053
chr5	147477739	147478739
chr11	118906114	118907114
chr11	52174782	52175782
chr19	41890590	41891590
chr4	53036055	53037055
chr15	102003739	102004739
chr1	67125385	67126385
chr5	77535888	77536888
chr17	23897202	23898202
chr16	91564960	91565960
chr17	73903681	73904681
chr10	26493023	26494023
chr8	73160457	73161457
chr7	31259711	31260711
chr14	27700179	27701179
chr17	30219967	30220967
chr15	57536466	57537466
chr5	65101139	65102139
chr11	57583037	57584037
chr2	24943000	24944000
chr18	32298792	32299792
chr15	80019058	80020058
chr2	165122593	165123593
chr16	18653044	18654044
chr14	69930964	69931964
chr14	77222481	77223481
chr15	74397346	74398346
chr7	87080069	87081069
chr15	82624439	82625439
chr7	105533477	105534477
chr16	91454542	91455542
chr10	24646394	24647394
chr2	167713144	167714144
chr18	21089492	21090492
chr17	35261164	35262164
chr8	13060467	13061467
chr11	115042998	115043998
chr1_random	412035	413035
chr8	11472797	11473797
chr17	29061560	29062560
chr6	38852506	38853506
chr4	141115536	141116536
chr14	70417707	70418707
chr19	3690939	3691939
chr4	148211993	148212993
chr8	36729937	36730937
chr16	97954960	97955960
chr2	25011454	25012454
chr2	5139994	5140994
chr12	78608349	78609349
chr11	12311117	12312117
chr18	36546226	36547226
chr3	27218284	27219284
chr3	6115625	6116625
chr15	76520447	76521447
chr1	173143607	173144607
chr11	54752197	54753197
chr19	55321736	55322736
chr1	37566512	37567512
chr17	48686674	48687674
chr9	34938076	34939076
chr17	34683394	34684394
chr11	74569843	74570843
chr19	40565636	40566636
chr6	114346309	114347309
chr10	127097985	127098985
chr18	33368906	33369906
chr17	6444830	6445830
chr11	62351633	62352633
chr11	119410845	119411845
chr5	33067703	33068703
chr4	147276663	147277663
chr18	32217522	32218522
chr11	101380328	101381328
chr11	98796088	98797088
chr8	70018905	70019905
chr4	94392173	94393173
chr3	152012044	152013044
chr13	43881515	43882515
chr4	55617566	55618566
chr7	120358038	120359038
chr17	6300119	6301119
chr11	69224352	69225352
chr13	5862539	5863539
chr5	28216129	28217129
chr4	62163771	62164771
chr7	36095998	36096998
chr1	89788732	89789732
chr18	34198144	34199144
chr5	122053495	122054495
chr18	73915707	73916707
chr2	144023712	144024712
chr15	102211917	102212917
chr11	60279311	60280311
chr17	6638304	6639304
chr15	75724481	75725481
chr6	83081151	83082151
chr17	6822151	6823151
chr1	158839143	158840143
chr10	62514461	62515461
chr11	96890763	96891763
chr2	4983522	4984522
chr17	35047711	35048711
chr7	24897702	24898702
chr4	62354464	62355464
chr8	127239184	127240184
chr14	66890237	66891237
chr1	137065073	137066073
chr15	63995337	63996337
chr2	179979762	179980762
chr3	122581544	122582544
chr3	121542996	121543996
chr10	93615611	93616611
chr13	24977483	24978483
chr14	121870380	121871380
chr12	112505702	112506702
chr14	11241550	11242550
chr11	72288115	72289115
chr2	129073253	129074253
chr4	154288545	154289545
chr7	121878252	121879252
chr2	160158419	160159419
chr2	157247354	157248354
chr4	144502933	144503933
chr4	132318207	132319207
chr7	105672432	105673432
chr2	160071775	160072775
chr9	106341012	106342012
chr17	46087178	46088178
chr6	90400975	90401975
chr11	5639418	5640418
chr9	62875636	62876636
chr5	51975192	51976192
chr6	125113547	125114547
chr2	173844189	173845189
chr10	79794529	79795529
chr2	60213382	60214382
chr2	150725733	150726733
chr17	44288468	44289468
chr11	119777112	119778112
chr19	57611997	57612997
chr4	150063481	150064481
chr2	4794169	4795169
chr15	66896055	66897055
chr9	102925480	102926480
chr7	4349128	4350128
chr4	132291492	132292492
chr10	61119412	61120412
chr19	57439175	57440175
chr2	72635113	72636113
chr4	45812479	45813479
chr10	127303019	127304019
chr11	120437662	120438662
chr5	37115202	37116202
chr4	124424851	124425851
chr2	177762008	177763008
chr11	116070264	116071264
chr10	6805890	6806890
chr10	111012831	111013831
chr17	34998973	34999973
chr19	53379833	53380833
chr6	127364677	127365677
chr9	61215231	61216231
chr4	141127060	141128060
chr7	143649160	143650160
chr7	139925008	139926008
chr6	28419722	28420722
chr10	81011205	81012205
chr16	18631401	18632401
chr4	148176807	148177807
chr2	26455961	26456961
chr17	24983973	24984973
chr15	99986439	99987439
chr10	118203570	118204570
chr12	111682306	111683306
chr11	96798859	96799859
chr8	97395140	97396140
chr19	6262654	6263654
chr12	60111942	60112942
chr6	34361647	34362647
chr17	50558973	50559973
chr5	64989476	64990476
chr7	105252982	105253982
chr17	29624852	29625852
chr2	180048757	180049757
chr17	27957404	27958404
chr13	112388012	112389012
chr8	97278063	97279063
chr12	102033527	102034527
chr7	119323359	119324359
chr16	11069870	11070870
chr7	20262974	20263974
chr3	84018191	84019191
chr6	87825275	87826275
chr13	3752227	3753227
chr4	128655614	128656614
chr8	114271390	114272390
chr11	51568731	51569731
chr4	133015667	133016667
chr17	51054175	51055175
chr11	79985145	79986145
chr13	45395642	45396642
chr3	108695526	108696526
chr13	64131803	64132803
chr4	134040722	134041722
chr7	29754586	29755586
chr9	106059957	106060957
chr2	160056237	160057237
chr11	22783349	22784349
chr6	29974091	29975091
chr5	87808658	87809658
chr11	99465708	99466708
chr4	137417335	137418335
chr6	86586149	86587149
chr8	74693474	74694474
chr4	128787359	128788359
chr7	130587742	130588742
chr15	95688942	95689942
chr12	60231502	60232502
chr3	35824456	35825456
chr12	112927293	112928293
chr2	157256056	157257056
chr10	127325417	127326417
chr9	19062793	19063793
chr4	148052576	148053576
chr4	116554984	116555984
chr3	27935952	27936952
chr12	16663748	16664748
chr2	75303877	75304877
chr12	55675848	55676848
chr18	42670422	42671422
chr2	121275796	121276796
chr2	38386362	38387362
chr10	39152143	39153143
chr11	97672649	97673649
chr2	165109610	165110610
chr1	169307737	169308737
chr9	7855008	7856008
chr11	118843331	118844331
chr16	28905323	28906323
chr7	108496612	108497612
chr2	72312187	72313187
chr4	82153957	82154957
chr14	32642606	32643606
chr4	41278397	41279397
chr17	3251638	3252638
chr3	107592790	107593790
chr7	148622590	148623590
chr4	40128391	40129391
chr16	14004501	14005501
chr4	116493733	116494733
chr10	129981771	129982771
chr2	5518630	5519630
chr18	63888738	63889738
chr1	132726177	132727177
chr5	44213804	44214804
chr17	24137226	24138226
chr15	98710599	98711599
chr5	92999996	93000996
chr5	143543738	143544738
chr11	94450682	94451682
chr9	43891290	43892290
chr4	106403133	106404133
chr2	129057908	129058908
chr12	78195715	78196715
chr9	102647382	102648382
chr11	53717433	53718433
chr14	31973050	31974050
chr2	26073856	26074856
chr12	70495637	70496637
chr8	74763969	74764969
chr9	51069357	51070357
chr10	69352957	69353957
chr15	77223891	77224891
chr16	28927196	28928196
chr12	100335011	100336011
chr6	115452769	115453769
chr7	53123470	53124470
chr8	12483242	12484242
chr4	106280164	106281164
chr17	87751844	87752844
chr7	29716298	29717298
chr4	41265248	41266248
chr19	18898815	18899815
chr4	62161485	62162485
chr10	114795792	114796792
chr16	38282505	38283505
chr12	7984956	7985956
chr11	118839849	118840849
chr1	166116923	166117923
chr7	105503109	105504109
chr13	56779171	56780171
chr15	99795512	99796512
chr19	3831535	3832535
chr3	130966700	130967700
chr5	4019009	4020009
chr2	173957684	173958684
chr1	156910829	156911829
chr3	126826080	126827080
chr17	35484241	35485241
chr1	140861807	140862807
chr16	48422411	48423411
chr19	58953771	58954771
chr11	116839329	116840329
chr7	128147160	128148160
chr10	120922988	120923988
chr4	62329407	62330407
chr10	79609081	79610081
chr8	97726230	97727230
chr19	4496200	4497200
chr13	91102142	91103142
chr7	134504646	134505646
chr2	27317469	27318469
chr11	49008273	49009273
chr16	57079363	57080363
chr11	119381721	119382721
chr3	27219816	27220816
chr10	59149575	59150575
chr7	89881287	89882287
chr14	69873283	69874283
chr11	90216155	90217155
chr2	24940344	24941344
chr4	71783691	71784691
chr6	58702136	58703136
chr11	119438766	119439766
chr11	62572091	62573091
chr5	31999510	32000510
chr8	97305258	97306258
chr1	90113888	90114888
chr2	166893219	166894219
chr9	58123721	58124721
chr11	86729846	86730846
chr19	10678395	10679395
chr12	4849665	4850665
chr6	71095340	71096340
chr18	32215324	32216324
chr5	144166588	144167588
chr2	33322999	33323999
chr7	151008034	151009034
chr11	74636210	74637210
chr4	104135279	104136279
chr12	21245857	21246857
chr18	12517262	12518262
chr10	127099092	127100092
chr14	77204530	77205530
chr2	112138050	112139050
chr13	9833195	9834195
chr8	81792479	81793479
chr4	41041508	41042508
chr18	54013118	54014118
chr18	38367151	38368151
chr2	27481742	27482742
chr5	53060266	53061266
chr9	121707948	121708948
chr2	167496294	167497294
chr11	35583979	35584979
chr3	80821113	80822113
chr9	63607837	63608837
chr14	21487414	21488414
chr4	57143029	57144029
chr11	7944773	7945773
chr7	20428186	20429186
chr17	35422028	35423028
chr12	80250245	80251245
chr15	31512771	31513771
chr2	27103517	27104517
chr6	124613132	124614132
chr6	131288969	131289969
chr2	167241350	167242350
chr7	39011333	39012333
chr11	115319120	115320120
chr2	4642048	4643048
chr5	140593608	140594608
chr4	55731063	55732063
chr9	44126206	44127206
chr12	100882883	100883883
chr17	29690754	29691754
chr5	115605473	115606473
chr5	37091805	37092805
chr2	21166766	21167766
chr8	129353256	129354256
chr15	3220431	3221431
chr8	73176823	73177823
chr13	101140229	101141229
chr7	126665602	126666602
chr8	87503859	87504859
chr16	21827962	21828962
chr11	31934166	31935166
chr5	135122986	135123986
chr18	38549077	38550077
chr9	70320850	70321850
chr7	112543602	112544602
chr17	36266125	36267125
chr1	170311260	170312260
chr16	8630128	8631128
chr8	72597820	72598820
chr13	52074481	52075481
chr17	43242709	43243709
chr11	84640749	84641749
chr7	130510923	130511923
chr9	121251572	121252572
chr16	24402599	24403599
chr8	74685424	74686424
chr1	127346580	127347580
chr7	106363053	106364053
chr4	40745785	40746785
chr2	122060899	122061899
chr18	66634694	66635694
chr19	34657323	34658323
chr12	85251088	85252088
chr4	115495636	115496636
chr7	52963226	52964226
chr11	116056309	116057309
chr7	134569502	134570502
chr4	148863517	148864517
chr17	56414363	56415363
chr2	24935291	24936291
chr17	35462618	35463618
chr11	48903361	48904361
chr5	119434659	119435659
chr19	58821810	58822810
chr3	122126281	122127281
chr11	75347568	75348568
chr3	30974519	30975519
chr11	70550893	70551893
chr15	82191475	82192475
chr9	50362983	50363983
chr12	103920085	103921085
chr8	119406124	119407124
chr9	7857369	7858369
chr11	53236305	53237305
chr10	76484844	76485844
chr11	101446063	101447063
chr1	132729080	132730080
chr6	135276285	135277285
chr1	137708310	137709310
chr3	35598532	35599532
chr10	112452825	112453825
chr19	21126947	21127947
chr2	84596064	84597064
chr1	82780792	82781792
chr2	154916839	154917839
chr8	73182848	73183848
chr14	56204202	56205202
chr5	136258491	136259491
chr2	75550699	75551699
chr3	101330191	101331191
chr14	103486669	103487669
chr9	114625417	114626417
chr12	118633676	118634676
chr7	148777747	148778747
chr4	154579700	154580700
chr15	99530317	99531317
chr15	31474575	31475575
chr11	53572177	53573177
chr15	97775928	97776928
chr5	115139639	115140639
chr15	73100547	73101547
chr8	4350324	4351324
chr14	46616177	46617177
chr15	99216998	99217998
chr1	171856785	171857785
chr3	21254781	21255781
chr5	93191123	93192123
chr3	122574132	122575132
chr17	74299180	74300180
chr19	4023993	4024993
chr9	51126094	51127094
chr1	39255858	39256858
chr13	111182471	111183471
chr12	46023948	46024948
chr10	80638634	80639634
chrX	166444700	166445700
chr2	77359986	77360986
chr4	124466920	124467920
chr10	77044212	77045212
chr11	53575641	53576641
chr1	196840116	196841116
chr9	106151764	106152764
chr2	164257244	164258244
chr18	85090833	85091833
chr11	57514871	57515871
chr11	98966999	98967999
chr15	75674323	75675323
chr14	25818145	25819145
chr2	151837219	151838219
chr12	103921317	103922317
chr13	44484672	44485672
chr12	85263792	85264792
chr12	112217743	112218743
chr2	119820305	119821305
chr13	97426290	97427290
chr1	95589728	95590728
chr16	4029185	4030185
chr3	73521211	73522211
chr13	102793272	102794272
chr17	32672207	32673207
chr9	88606906	88607906
chr11	120541032	120542032
chr11	35772458	35773458
chr7	30035817	30036817
chr4	150288281	150289281
chr15	38207432	38208432
chr9	61022884	61023884
chr3	151776125	151777125
chr11	70997630	70998630
chr8	126232421	126233421
chr13	94930460	94931460
chr18	39826474	39827474
chr9	123092078	123093078
chr11	106638452	106639452
chr15	36828561	36829561
chr12	78602540	78603540
chr8	119516523	119517523
chr15	99223676	99224676
chr5	115434813	115435813
chr15	98492530	98493530
chr7	133904725	133905725
chr9	75210643	75211643
chr16	76225193	76226193
chr5	64857028	64858028
chr17	33912110	33913110
chr7	87023173	87024173
chr12	85582124	85583124
chr17	59152373	59153373
chr3	137784209	137785209
chr6	136695920	136696920
chr4	62040461	62041461
chr15	61281410	61282410
chr5	137441341	137442341
chr10	12445854	12446854
chr17	71214417	71215417
chr11	12326484	12327484
chr2	172963481	172964481
chr5	53469478	53470478
chr11	20957810	20958810
chr4	141416113	141417113
chr11	60650868	60651868
chr12	16915351	16916351
chr7	108153427	108154427
chr1	187292986	187293986
chr4	117890841	117891841
chr13	58590149	58591149
chr17	37034223	37035223
chr11	117038640	117039640
chr10	80563463	80564463
chr5	143530457	143531457
chr17	89026222	89027222
chr19	40574131	40575131
chr6	58719344	58720344
chr17	78787120	78788120
chr7	149391193	149392193
chr5	140213643	140214643
chr4	33347901	33348901
chr7	134510118	134511118
chr16	33222312	33223312
chr5	109137120	109138120
chr11	62848727	62849727
chr12	7926401	7927401
chr11	94365275	94366275
chr5	136218409	136219409
chr3	94171121	94172121
chr14	60285825	60286825
chr3	88061116	88062116
chr13	84373294	84374294
chr8	3256235	3257235
chr19	41962351	41963351
chr5	30022636	30023636
chr7	86401301	86402301
chr3	38364756	38365756
chr13	73892907	73893907
chr16	76202072	76203072
chr4	97801164	97802164
chr5	37380087	37381087
chr2	35165398	35166398
chr14	37784141	37785141
chr9	46031907	46032907
chr16	38294424	38295424
chr10	74649808	74650808
chr12	82027157	82028157
chr5	54378410	54379410
chr14	47915652	47916652
chr15	76335793	76336793
chr8	64113289	64114289
chr4	132619424	132620424
chr2	24335361	24336361
chr13	46790530	46791530
chr8	109108744	109109744
chr12	112399833	112400833
chr2	73776665	73777665
chr15	83135350	83136350
chr14	79250277	79251277
chr19	40463275	40464275
chr2	25120247	25121247
chr9	64041401	64042401
chr7	134419639	134420639
chr7	139952725	139953725
chr2	155663331	155664331
chr8	13698021	13699021
chr11	117724390	117725390
chr3	89581742	89582742
chr5	53616389	53617389
chr12	101519358	101520358
chr19	9113414	9114414
chr13	25069249	25070249
chr6	125295781	125296781
chr10	35587459	35588459
chr10	126862551	126863551
chr7	88256336	88257336
chr11	115210984	115211984
chr1	120854854	120855854
chr19	5689249	5690249
chr4	94899508	94900508
chr13	95028213	95029213
chr5	137639309	137640309
chr3	122086754	122087754
chr9	113977508	113978508
chr18	85072353	85073353
chr13	97993948	97994948
chr13	43915105	43916105
chr16	21946426	21947426
chr5	137446183	137447183
chr18	65162154	65163154
chr2	142514950	142515950
chr15	77543840	77544840
chr5	33076290	33077290
chr12	85265802	85266802
chr10	80555020	80556020
chr8	126371331	126372331
chr10	80449255	80450255
chr16	35911251	35912251
chr2	60248082	60249082
chr8	71586997	71587997
chr18	35331364	35332364
chr2	156912172	156913172
chr1	189650345	189651345
chr4	131750675	131751675
chr3	95688042	95689042
chr16	33772557	33773557
chr7	35700275	35701275
chr5	108882790	108883790
chr5	115482394	115483394
chr11	101341938	101342938
chr1	169269960	169270960
chr5	135565224	135566224
chr5	33066025	33067025
chr15	63025438	63026438
chr4	57964992	57965992
chr4	45979253	45980253
chr2	27559175	27560175
chr3	90044827	90045827
chr5	37087475	37088475
chr8	127455796	127456796
chr5	136121661	136122661
chr8	18662614	18663614
chr2	30248543	30249543
chr15	100561242	100562242
chr4	116361606	116362606
chr13	114308052	114309052
chr14	41842307	41843307
chr4	132563586	132564586
chr17	28424368	28425368
chr6	113605162	113606162
chr14	69920367	69921367
chr17	15083229	15084229
chr18	12413519	12414519
chr2	180931270	180932270
chr5	31227334	31228334
chr19	36628271	36629271
chr1	89804882	89805882
chr10	106040082	106041082
chr3	142407771	142408771
chr14	46635058	46636058
chr9	123677280	123678280
chr13	52909606	52910606
chr5	122752727	122753727
chr14	26166116	26167116
chr16	56709936	56710936
chr2	72703717	72704717
chr7	29941119	29942119
chr9	103377422	103378422
chr2	30056047	30057047
chr10	44633266	44634266
chr11	35545573	35546573
chr17	84044177	84045177
chr18	12386955	12387955
chr6	134673846	134674846
chr9	44059032	44060032
chr15	98858893	98859893
chr5	139793055	139794055
chr7	148306609	148307609
chr13	73833667	73834667
chr1	72340149	72341149
chr6	6135033	6136033
chr7	97279929	97280929
chr10	18740364	18741364
chr17	88725468	88726468
chr14	55028662	55029662
chr7	4555452	4556452
chr14	46897185	46898185
chr6	88201064	88202064
chr13	103653773	103654773
chr4	116164708	116165708
chr4	49498028	49499028
chr2	170278988	170279988
chr11	19893532	19894532
chr10	3214309	3215309
chr11	76758607	76759607
chr8	13200412	13201412
chr1	90116590	90117590
chr5	138182550	138183550
chr14	70574294	70575294
chr11	55030732	55031732
chr17	30144524	30145524
chr8	67649644	67650644
chr16	8566259	8567259
chr8	93672497	93673497
chr16	17525999	17526999
chr1	182711728	182712728
chr10	66390978	66391978
chr11	6011412	6012412
chr10	69572287	69573287
chr6	53997073	53998073
chr1	43456336	43457336
chr17	36195084	36196084
chr4	141129228	141130228
chr6	148133804	148134804
chr1	135590441	135591441
chr1	138015810	138016810
chr18	35277614	35278614
chr2	165947195	165948195
chr4	136008384	136009384
chr4	59658572	59659572
chr10	77362528	77363528
chr1	121966470	121967470
chr15	75656747	75657747
chr11	86492254	86493254
chr11	78661460	78662460
chr1	43204129	43205129
chr1	174412799	174413799
chr12	78078006	78079006
chr19	61231046	61232046
chr18	60882127	60883127
chr10	96949695	96950695
chr15	9064183	9065183
chr15	72986023	72987023
chr1	88079921	88080921
chr13	34366403	34367403
chr2	76380715	76381715
chr4	34999238	35000238
chr7	106378183	106379183
chr3	52488978	52489978
chr2	32627064	32628064
chr17	34631798	34632798
chr4	133437436	133438436
chr6	87820898	87821898
chr10	98709381	98710381
chr8	118588102	118589102
chr14	70915225	70916225
chr15	80075973	80076973
chr12	85049113	85050113
chr12	80414344	80415344
chr10	127323325	127324325
chr12	46170712	46171712
chr1	74743635	74744635
chr6	58627467	58628467
chr4	116122282	116123282
chr7	87197657	87198657
chr8	25537599	25538599
chr19	43992927	43993927
chr19	3929270	3930270
chr6	71186170	71187170
chr12	103837529	103838529
chr2	26466248	26467248
chr1	178943223	178944223
chr2	128546884	128547884
chr6	134193172	134194172
chr7	72599923	72600923
chr17	29559639	29560639
chr11	119354781	119355781
chr18	39523873	39524873
chr8	27050638	27051638
chr6	72472789	72473789
chr11	95248344	95249344
chr16	4777613	4778613
chr17	13748532	13749532
chr14	121492805	121493805
chr13	92809328	92810328
chr4	80519668	80520668
chr3	137231599	137232599
chr4	149531268	149532268
chr8	23090740	23091740
chr12	112913731	112914731
chr2	76312133	76313133
chr11	62438103	62439103
chr18	84854014	84855014
chr10	75573322	75574322
chr3	96379183	96380183
chr5	93267248	93268248
chr13	44160729	44161729
chr7	53014519	53015519
chr11	54624312	54625312
chr14	23933748	23934748
chr12	88745749	88746749
chr7	148112766	148113766
chr6	31347870	31348870
chr3	118269437	118270437
chr7	139947791	139948791
chr2	14097817	14098817
chr9	53660965	53661965
chr5	30558191	30559191
chr1	137075657	137076657
chr7	52830074	52831074
chr13	69783019	69784019
chr9	114904104	114905104
chr18	60765699	60766699
chr11	87405993	87406993
chr10	39626783	39627783
chr8	46047878	46048878
chr7	108212846	108213846
chr2	167973255	167974255
chr18	60816070	60817070
chr4	71679461	71680461
chr17	24111648	24112648
chr16	24236833	24237833
chr6	115488766	115489766
chr3	157260731	157261731
chr19	8789402	8790402
chr10	79733280	79734280
chr15	101327360	101328360
chr5	147753205	147754205
chr15	98713701	98714701
chr14	36505298	36506298
chr9	60164799	60165799
chr7	148094174	148095174
chr14	65143876	65144876
chr16	96041429	96042429
chr11	62371845	62372845
chr11	101530060	101531060
chr17	86921689	86922689
chr14	26285624	26286624
chr12	78314886	78315886
chr5	89022203	89023203
chr18	46579286	46580286
chr8	73189246	73190246
chr17	15494206	15495206
chr6	48977577	48978577
chr12	84936864	84937864
chr10	128024431	128025431
chr4	151534614	151535614
chr16	78242218	78243218
chr8	97636170	97637170
chr5	101061311	101062311
chr10	23516340	23517340
chr1	137071468	137072468
chr14	8845185	8846185
chr17	44271097	44272097
chr13	102700940	102701940
chr14	12698095	12699095
chr6	67172531	67173531
chr17	13501624	13502624
chr11	115138367	115139367
chr2	68973266	68974266
chr19	9998812	9999812
chr10	127442218	127443218
chr17	3079341	3080341
chr1	169284264	169285264
chr2	163249061	163250061
chr12	113368965	113369965
chr11	102966361	102967361
chr12	60106134	60107134
chr7	106985890	106986890
chr1	174391440	174392440
chr5	122288721	122289721
chr6	37338113	37339113
chr4	107051245	107052245
chr18	66661964	66662964
chr4	134047161	134048161
chr3	136644684	136645684
chr17	34653113	34654113
chr3	97560188	97561188
chr4	106411042	106412042
chr7	106385116	106386116
chr9	64068111	64069111
chr12	86768449	86769449
chr9	7967702	7968702
chr10	125370192	125371192
chr18	47594575	47595575
chr13	45550220	45551220
chr3	144275023	144276023
chr18	65007576	65008576
chr14	56500627	56501627
chr5	114904619	114905619
chr16	85144324	85145324
chr1	64736036	64737036
chr9	66790122	66791122
chr8	107332083	107333083
chr12	31758318	31759318
chr18	73705612	73706612
chr17	84536450	84537450
chr14	57245323	57246323
chr2	25417756	25418756
chr5	36883339	36884339
chr5	32436490	32437490
chr3	120965789	120966789
chr15	67069765	67070765
chr6	112249948	112250948
chr17	49444142	49445142
chr11	117911195	117912195
chr17	66123467	66124467
chr7	117758984	117759984
chr5	64907010	64908010
chr3	63321334	63322334
chr10	25239419	25240419
chr8	109972708	109973708
chr10	98684444	98685444
chr11	73150084	73151084
chr2	72896071	72897071
chr10	117173873	117174873
chr8	126343869	126344869
chr3	84039050	84040050
chr7	30202874	30203874
chr5	129598716	129599716
chr15	79989398	79990398
chr2	32215831	32216831
chr9	110597586	110598586
chr5	38889288	38890288
chr14	58395437	58396437
chr2	33216500	33217500
chr15	89009469	89010469
chr4	135261627	135262627
chr4	151724422	151725422
chr10	126348210	126349210
chr16	97951635	97952635
chr11	69222865	69223865
chr10	82587032	82588032
chr11	95775818	95776818
chr14	12451815	12452815
chr8	74223276	74224276
chr1	166346874	166347874
chr5	135219543	135220543
chr19	59445373	59446373
chr12	51374247	51375247
chr8	129426691	129427691
chr9	123032339	123033339
chr11	79898453	79899453
chr16	11742167	11743167
chr9	107198786	107199786
chr17	57201376	57202376
chr4	119862065	119863065
chr16	30959432	30960432
chr7	53012417	53013417
chr7	125687330	125688330
chr12	103963487	103964487
chr2	157334586	157335586
chr2	154215721	154216721
chr19	14738880	14739880
chr8	13462044	13463044
chr7	106309728	106310728
chr11	53837404	53838404
chr9	106692919	106693919
chr2	133579545	133580545
chr7	151034366	151035366
chr13	113644059	113645059
chr3	121912079	121913079
chr2	33789005	33790005
chr18	39746858	39747858
chr2	121966221	121967221
chr7	104914165	104915165
chr5	113648222	113649222
chr10	90522221	90523221
chr17	46133628	46134628
chr3	101306001	101307001
chr6	50314022	50315022
chr6	87822686	87823686
chr3	35619608	35620608
chr3	89192109	89193109
chr13	53236358	53237358
chr19	56535727	56536727
chr4	155477107	155478107
chr5	143673719	143674719
chr15	75965925	75966925
chr16	32740022	32741022
chr16	87670390	87671390
chr11	103201745	103202745
chr7	120321280	120322280
chr19	4820263	4821263
chr19	43961879	43962879
chr15	83104347	83105347
chr1_random	413029	414029
chr10	75106519	75107519
chr9	108898224	108899224
chr9	98252496	98253496
chr10	62502398	62503398
chr3	104505333	104506333
chr3	92084823	92085823
chr13	94929459	94930459
chr2	156279306	156280306
chr2	28487948	28488948
chr15	99548618	99549618
chr9	57278692	57279692
chr13	34396487	34397487
chr4	123444678	123445678
chr7	39005564	39006564
chr15	36740611	36741611
chr3	94910883	94911883
chr7	129276006	129277006
chr10	26548197	26549197
chr17	25406519	25407519
chr1	91377538	91378538
chr9	96789648	96790648
chr16	91928216	91929216
chr11	83575555	83576555
chr1	55826960	55827960
chr2	119124461	119125461
chr12	32871421	32872421
chr2	167841013	167842013
chr9	44466431	44467431
chr12	111458446	111459446
chr10	110231289	110232289
chr11	51581492	51582492
chr2	51826038	51827038
chr8	25616378	25617378
chr17	3083821	3084821
chr17	36220687	36221687
chr6	47257872	47258872
chr2	29478403	29479403
chr15	77759795	77760795
chr11	58418390	58419390
chr14	70572967	70573967
chr9	108757389	108758389
chr16	34938067	34939067
chr7	136428408	136429408
chr10	18182725	18183725
chr2	120229999	120230999
chr7	127294141	127295141
chr7	96473317	96474317
chr4	132165820	132166820
chr6	48825218	48826218
chr6	116128168	116129168
chr10	13213488	13214488
chr5	123485340	123486340
chr19	12084454	12085454
chr10	19939865	19940865
chr19	46858523	46859523
chr2	122484461	122485461
chr14	20983331	20984331
chr16	10448786	10449786
chr1	136172458	136173458
chr2	126968587	126969587
chr10	61683510	61684510
chr11	78964422	78965422
chr7	87204931	87205931
chr2	72092696	72093696
chr11	120045948	120046948
chr5	121692372	121693372
chr12	17494993	17495993
chr10	125401410	125402410
chr11	93822456	93823456
chr7	35814042	35815042
chr8	25538725	25539725
chr5	137402951	137403951
chr17	13633536	13634536
chr3	69676386	69677386
chr13	73850521	73851521
chr9	51132395	51133395
chr9	121614041	121615041
chr11	69230614	69231614
chr4	106658446	106659446
chr7	142713109	142714109
chr3	96705929	96706929
chr4	155428419	155429419
chr2	174485622	174486622
chr2	29690442	29691442
chr1	186706430	186707430
chr13	75972668	75973668
chr3	128923565	128924565
chr9	92277932	92278932
chr3	137904114	137905114
chr9	57816390	57817390
chr15	3172312	3173312
chr8	58824515	58825515
chr8	36037860	36038860
chr6	29697501	29698501
chr7	81520105	81521105
chr5	143573269	143574269
chr2	155652312	155653312
chr7	30281338	30282338
chr19	55498089	55499089
chr12	55413590	55414590
chr19	29120133	29121133
chr16	95857923	95858923
chr3	88231381	88232381
chr2	73454474	73455474
chr10	60295207	60296207
chr15	75750226	75751226
chr7	75418125	75419125
chr7	53028529	53029529
chr13	52250491	52251491
chr5	135583794	135584794
chr9	30933421	30934421
chr19	18979691	18980691
chr7	29705964	29706964
chr8	118667187	118668187
chr2	68698076	68699076
chr1	187434851	187435851
chr6	134680622	134681622
chr19	42529092	42530092
chr12	88748816	88749816
chr16	4556661	4557661
chr8	86382693	86383693
chr4	138978909	138979909
chr17	78814288	78815288
chr8	124830176	124831176
chr10	125314148	125315148
chr4	89168028	89169028
chr17	26116972	26117972
chr8	127175429	127176429
chr4	122938635	122939635
chr2	170282417	170283417
chr12	101594292	101595292
chr17	80337352	80338352
chr14	31424692	31425692
chr11	98441466	98442466
chr9	121345317	121346317
chr10	128397611	128398611
chr14	21043434	21044434
chr5	145120465	145121465
chr14	32743152	32744152
chr10	53837709	53838709
chr1	187106326	187107326
chr13	75362783	75363783
chr19	18894052	18895052
chr6	50305009	50306009
chr2	167630981	167631981
chr4	118029118	118030118
chr11	69774506	69775506
chr15	36513829	36514829
chr6	42301501	42302501
chr13	55492607	55493607
chr4	132677608	132678608
chr17	24331758	24332758
chr5	104464551	104465551
chr15	73341354	73342354
chr3	122215633	122216633
chr9	43071556	43072556
chr11	78244177	78245177
chr17	28833302	28834302
chr15	74503034	74504034
chr17	34611735	34612735
chr11	90224849	90225849
chr10	118303938	118304938
chr7	53993620	53994620
chr19	53333302	53334302
chr7	109394311	109395311
chr3	109372834	109373834
chr18	61395537	61396537
chr11	20361781	20362781
chr11	96048350	96049350
chr18	32312832	32313832
chr8	49950487	49951487
chr2	84911747	84912747
chr3	129920316	129921316
chr11	104107422	104108422
chr11	121559393	121560393
chr8	73203486	73204486
chr7	108211240	108212240
chr8	129097443	129098443
chr18	36646252	36647252
chr7	107760905	107761905
chr19	55926138	55927138
chr2	37578324	37579324
chr2	166011403	166012403
chr3	21885369	21886369
chr1	72219576	72220576
chr4	59007292	59008292
chr17	31441563	31442563
chr5	33078635	33079635
chr12	114984251	114985251
chr12	56572060	56573060
chr6	145287050	145288050
chr8	118230960	118231960
chr11	109563051	109564051
chr4	136017718	136018718
chr17	29098257	29099257
chr18	61031079	61032079
chr9	95721388	95722388
chr6	83892483	83893483
chr10	18743880	18744880
chrX	96713508	96714508
chr11	59746051	59747051
chr1	88997735	88998735
chr16	10471712	10472712
chr2	70679855	70680855
chr19	17484839	17485839
chr2	128005391	128006391
chr10	82398272	82399272
chr19	44095695	44096695
chr3	19100795	19101795
chr3	51837486	51838486
chr12	79869660	79870660
chr8	129298449	129299449
chr15	76340571	76341571
chr9	63510234	63511234
chr10	13703186	13704186
chr8	47226706	47227706
chr17	85427154	85428154
chr7	104928411	104929411
chr5	122304916	122305916
chr6	113662477	113663477
chr14	70457141	70458141
chr6	67095692	67096692
chr5	138367501	138368501
chr19	20730225	20731225
chr6	131271523	131272523
chr19	7263255	7264255
chr1	13689330	13690330
chr18	75456541	75457541
chr12	85603574	85604574
chr2	24375827	24376827
chr8	122136763	122137763
chr10	75617529	75618529
chr5	100809071	100810071
chr19	6170961	6171961
chr13	52102972	52103972
chr10	107661118	107662118
chr13	56696315	56697315
chr15	77752966	77753966
chr4	71799440	71800440
chr8	108020316	108021316
chr9	40272954	40273954
chr19	47053960	47054960
chr10	127386281	127387281
chr3	107672494	107673494
chr1	173433601	173434601
chr9	65519078	65520078
chr11	87408061	87409061
chr5	66489036	66490036
chr8	97054876	97055876
chr5	96831261	96832261
chr12	73886221	73887221
chr10	59411313	59412313
chr10	85815472	85816472
chr11	117065607	117066607
chr2	25413276	25414276
chr12	109927143	109928143
chr16	76317352	76318352
chr15	54049997	54050997
chr8	23500881	23501881
chr8	48921109	48922109
chr12	33776703	33777703
chr10	74670633	74671633
chr19	12069189	12070189
chr4	148697451	148698451
chr8	118046002	118047002
chr5	101275540	101276540
chr11	21449630	21450630
chr5	102197221	102198221
chr16	87603866	87604866
chr6	135311859	135312859
chr13	59662646	59663646
chr15	36772054	36773054
chr3	21834626	21835626
chr2	27245023	27246023
chr3	141937173	141938173
chr1	153110194	153111194
chr17	33925386	33926386
chr13	40946992	40947992
chr8	91166816	91167816
chr11	83959251	83960251
chr3	60287658	60288658
chr11	115614419	115615419
chr15	82626041	82627041
chr18	47492499	47493499
chr3	95122102	95123102
chr10	79814304	79815304
chr17	66940154	66941154
chr13	3751249	3752249
chr13	49057594	49058594
chr3	137956243	137957243
chr11	117738986	117739986
chr2	75534898	75535898
chr13	44423465	44424465
chr1	135773224	135774224
chr17	46051357	46052357
chr8	121964316	121965316
chr16	96304655	96305655
chr5	53465507	53466507
chr18	74661520	74662520
chr6	137453812	137454812
chr9	123587580	123588580
chr2	30053430	30054430
chr4	11642184	11643184
chr3	126393462	126394462
chr4	104927524	104928524
chr17	13337397	13338397
chr9	95715373	95716373
chr19	58018857	58019857
chr1	132694837	132695837
chr2	29628338	29629338
chr13	73900645	73901645
chr7	127316816	127317816
chr19	6994013	6995013
chr6	48360894	48361894
chr19	25053612	25054612
chr18	39712414	39713414
chr6	72533833	72534833
chr16	91552028	91553028
chr7	125616078	125617078
chr15	85062836	85063836
chr4	138762720	138763720
chr1	74454912	74455912
chr7	105267243	105268243
chr1	172496328	172497328
chr19	6973902	6974902
chr3	129027782	129028782
chr4	11656035	11657035
chr16	95888863	95889863
chr18	21242284	21243284
chr1	134046490	134047490
chr3	113342147	113343147
chr15	36516005	36517005
chr11	54609217	54610217
chr2	118992820	118993820
chr15	99696178	99697178
chr17	32790519	32791519
chr2	30284286	30285286
chr7	151305134	151306134
chr2	131222715	131223715
chr5	100435794	100436794
chr7	129217667	129218667
chr5	124454386	124455386
chr4	53198698	53199698
chr18	73969356	73970356
chr11	116071689	116072689
chr12	81134100	81135100
chr17	66177996	66178996
chr17	31526282	31527282
chr7	88268171	88269171
chr17	7602435	7603435
chr18	20712443	20713443
chr1	89982370	89983370
chr12	36776561	36777561
chr3	88397430	88398430
chr4	151510423	151511423
chr1	181594060	181595060
chr11	86204857	86205857
chr16	23993788	23994788
chr9	121565235	121566235
chr8	19881243	19882243
chr7	63190102	63191102
chr6	66964472	66965472
chr11	61165150	61166150
chr9	61239687	61240687
chr2	160175052	160176052
chr5	28535962	28536962
chr3	122293443	122294443
chr6	136496986	136497986
chr10	75027810	75028810
chr10	19898740	19899740
chr1	60725427	60726427
chr10	127212719	127213719
chr19	12576205	12577205
chr10	128355793	128356793
chr5	38870616	38871616
chr8	107449599	107450599
chr7	88729910	88730910
chr4	149467607	149468607
chr5	124900525	124901525
chr3	122015478	122016478
chr7	148249873	148250873
chr7	116776328	116777328
chr7	91170638	91171638
chr10	19300212	19301212
chr12	53107983	53108983
chr19	42146076	42147076
chr14	56088251	56089251
chr3	87200531	87201531
chr4	59009649	59010649
chr6	135338514	135339514
chr3	65462946	65463946
chr1	121427252	121428252
chr12	74962202	74963202
chr1	133693326	133694326
chr7	26609743	26610743
chr2	50911451	50912451
chr4	55028030	55029030
chr4	98914906	98915906
chr1	107001468	107002468
chr5	144858772	144859772
chr3	142002020	142003020
chr12	52993169	52994169
chr14	76890799	76891799
chr1	181516602	181517602
chr10	21210514	21211514
chr19	5374375	5375375
chr13	36450450	36451450
chr7	53719352	53720352
chr3	122305886	122306886
chr17	3081178	3082178
chr17	14365095	14366095
chr9	101186192	101187192
chr19	6271789	6272789
chr8	113788302	113789302
chr1	194338986	194339986
chr11	50008006	50009006
chr11	101228263	101229263
chr5	114360449	114361449
chr8	14996212	14997212
chr1	31079872	31080872
chr11	103550556	103551556
chr2	150752839	150753839
chr4	151502594	151503594
chr10	125232078	125233078
chr8	129247099	129248099
chr12	8373179	8374179
chr11	70443271	70444271
chr4	116524843	116525843
chr12	32082270	32083270
chr12	16910961	16911961
chr7	130353056	130354056
chr18	78050331	78051331
chr8	126339248	126340248
chr15	66914406	66915406
chr3	10315407	10316407
chr5	140268860	140269860
chr18	69463109	69464109
chr5	53037262	53038262
chr6	134527741	134528741
chr11	53605276	53606276
chr7	124613529	124614529
chr6	108436328	108437328
chr3	148085283	148086283
chr9	43034598	43035598
chr11	65590098	65591098
chr5	92527459	92528459
chr6	43241846	43242846
chr9	58052075	58053075
chr6	47444220	47445220
chr6	149044458	149045458
chr7	130479530	130480530
chr9	56080881	56081881
chr11	96792277	96793277
chr1	64833889	64834889
chr4	149788510	149789510
chr3	137793874	137794874
chr5	119141072	119142072
chr4	106254781	106255781
chr1	173365267	173366267
chr13	73894029	73895029
chr5	104453933	104454933
chr8	96566804	96567804
chr1	95407768	95408768
chr17	23987524	23988524
chr12	21148071	21149071
chr1	56672014	56673014
chr2	132772475	132773475
chr8	63751883	63752883
chr7	35698607	35699607
chr13	37853118	37854118
chr10	118202579	118203579
chr17	29578758	29579758
chr4	131688074	131689074
chr12	112220939	112221939
chr14	66898622	66899622
chr3	135137740	135138740
chr7	86416928	86417928
chr10	39613630	39614630
chr4	154862557	154863557
chr18	64816558	64817558
chr4	119338497	119339497
chr11	54749596	54750596
chr9	44913885	44914885
chr17	46131122	46132122
chr18	61838873	61839873
chr5	144846203	144847203
chr4	89104774	89105774
chr18	36574478	36575478
chr15	79151719	79152719
chr12	40743086	40744086
chr13	3925016	3926016
chr11	116712936	116713936
chr2	174622110	174623110
chr13	75861440	75862440
chr14	26126409	26127409
chr8	96887592	96888592
chr10	95996868	95997868
chr19	45857619	45858619
chr14	51576523	51577523
chr7	4676432	4677432
chr19	55525993	55526993
chr9	46008647	46009647
chr12	16900578	16901578
chr7	20261694	20262694
chr7	125754539	125755539
chr14	12442073	12443073
chr15	89227036	89228036
chrX	15864922	15865922
chr13	81470643	81471643
chr3	90390626	90391626
chr9	107778154	107779154
chr2	132747907	132748907
chr12	100871658	100872658
chr6	17491385	17492385
chr8	23170051	23171051
chr5	137759461	137760461
chr18	39423871	39424871
chr1	58748286	58749286
chr5	65089475	65090475
chr15	98754742	98755742
chr7	80722350	80723350
chr16	76865840	76866840
chr11	6152555	6153555
chr17	29521346	29522346
chr5	31251960	31252960
chr4	149488511	149489511
chr6	67038377	67039377
chr1	172911337	172912337
chr11	119991899	119992899
chr11	69659521	69660521
chr15	36805830	36806830
chr9	75232026	75233026
chr1	192743717	192744717
chr13	23858309	23859309
chr3	126299038	126300038
chr13	52252564	52253564
chr12	104942805	104943805
chr19	6476687	6477687
chr11	19933216	19934216
chr14	66491920	66492920
chr12	83034051	83035051
chr5	77080182	77081182
chr9	59410147	59411147
chr6	115541409	115542409
chr5	119428631	119429631
chr11	98766597	98767597
chr13	74239289	74240289
chr16	8603607	8604607
chr4	104168921	104169921
chr9	114853374	114854374
chr8	129107159	129108159
chr1	40689223	40690223
chr10	79495275	79496275
chr2	131874980	131875980
chr7	4582315	4583315
chr10	122176016	122177016
chr11	120809523	120810523
chr18	56574762	56575762
chr3	151828431	151829431
chr17	26141376	26142376
chr6	113049337	113050337
chr10	95106331	95107331
chr16	94748910	94749910
chr17	28819232	28820232
chr13	20183046	20184046
chr5	134893953	134894953
chr7	128115614	128116614
chr14	59819088	59820088
chr10	12594276	12595276
chr14	31447325	31448325
chr9	114907669	114908669
chr10	77606330	77607330
chr2	27511794	27512794
chr4	117912588	117913588
chr1	187272443	187273443
chr7	134264676	134265676
chr13	56564876	56565876
chr5	139323684	139324684
chr12	70613852	70614852
chr17	5609894	5610894
chr5	125080410	125081410
chr8	126239420	126240420
chr11	49074664	49075664
chr17	35406276	35407276
chr14	70752871	70753871
chr17	14312668	14313668
chr18	64727052	64728052
chr3	107780301	107781301
chr17	33883886	33884886
chr13	90935120	90936120
chr7	16578286	16579286
chr14	26555093	26556093
chr12	111672784	111673784
chr4	118188988	118189988
chr8	79436842	79437842
chr17	87168829	87169829
chr14	29211803	29212803
chr11	109417135	109418135
chr15	81665571	81666571
chr3	109375438	109376438
chr7	4556450	4557450
chr4	106360844	106361844
chr1	109593089	109594089
chr7	72936982	72937982
chr2	124424567	124425567
chr19	42593079	42594079
chr6	91649478	91650478
chr2	170160351	170161351
chr18	46564586	46565586
chr3	104481410	104482410
chr18	54958306	54959306
chr7	150990638	150991638
chr6	5516275	5517275
chr11	48650209	48651209
chr3	107666675	107667675
chr16	91055104	91056104
chr14	103501623	103502623
chr17	86733991	86734991
chr13	113276160	113277160
chr5	53584290	53585290
chr4	141287396	141288396
chr2	32340056	32341056
chr2	91802020	91803020
chr5	113600607	113601607
chr4	134369579	134370579
chr14	66701183	66702183
chr2	92215336	92216336
chr10	12638835	12639835
chr11	70035081	70036081
chr16	37901176	37902176
chr11	62770993	62771993
chr4	53216141	53217141
chr10	119829707	119830707
chr2	120443892	120444892
chr13	115586355	115587355
chr17	65972168	65973168
chr9	107473133	107474133
chr9	122246505	122247505
chr2	174573780	174574780
chr2	124428811	124429811
chr9	44483893	44484893
chr3	122467669	122468669
chr11	95720050	95721050
chr12	85346089	85347089
chr19	24303032	24304032
chr11	115282062	115283062
chr8	122852485	122853485
chr7	106375018	106376018
chr18	21264175	21265175
chr8	108073674	108074674
chr5	117815630	117816630
chr9	51038470	51039470
chr2	26476550	26477550
chr7	86981814	86982814
chr2	157003529	157004529
chr8	28272042	28273042
chr7	148574146	148575146
chr11	109205172	109206172
chr9	58076576	58077576
chr4	154271938	154272938
chr2	118597912	118598912
chr10	57686273	57687273
chr2	32372475	32373475
chr4	155147119	155148119
chr4	124481307	124482307
chr17	34685836	34686836
chr11	94935724	94936724
chr2	58999475	59000475
chr4	136001481	136002481
chr7	82625314	82626314
chr5	46647727	46648727
chr9	95745892	95746892
chr15	97773368	97774368
chr4	98584605	98585605
chr14	66835657	66836657
chr6	54856341	54857341
chr11	8563611	8564611
chr9	46014965	46015965
chr11	87496309	87497309
chr2	166041048	166042048
chr1	107054017	107055017
chr2	113190756	113191756
chr15	85904676	85905676
chr12	85741346	85742346
chr12	8777369	8778369
chr1	133889031	133890031
chr18	34682270	34683270
chr8	117709702	117710702
chr16	66021768	66022768
chr1	36131624	36132624
chr18	70060199	70061199
chr11	94059980	94060980
chr11	60201152	60202152
chr7	134825436	134826436
chr4	125096441	125097441
chr19	41932006	41933006
chr16	76222949	76223949
chr4	148013236	148014236
chr3	92015324	92016324
chr2	91779171	91780171
chr10	95901030	95902030
chr17	46781643	46782643
[truncated: 26,933 more rows]

## Sheet: DHS sites only
Supplemental Table S8: DHS sites only (related to Supplemental Fig. S6)
DHS sites only (Do not intersect HNF4A ChIP-sites)
chr1	167166660	167167660
chr5	125945721	125946721
chr16	29782201	29783201
chr1	184212413	184213413
chr12	48934491	48935491
chr11	29146805	29147805
chr9	40538534	40539534
chr1	187341131	187342131
chr2	164228075	164229075
chr6	88033954	88034954
chr8	25590044	25591044
chr8	113917246	113918246
chr16	26581209	26582209
chr7	26035302	26036302
chr8	96019259	96020259
chr2	140615804	140616804
chr3	88270711	88271711
chr8	129767459	129768459
chr18	20686159	20687159
chr11	78136037	78137037
chr18	75979314	75980314
chr8	36770624	36771624
chr4	9062619	9063619
chr11	66727449	66728449
chr1	184838089	184839089
chr14	103745610	103746610
chr5	145726249	145727249
chr6	29222159	29223159
chr5	135582183	135583183
chr1	157140269	157141269
chr8	91220290	91221290
chr16	93607547	93608547
chr1	155233500	155234500
chr5	99583362	99584362
chr5	31593069	31594069
chr2	92314663	92315663
chr8	97855649	97856649
chr13	54285035	54286035
chr4	132439923	132440923
chr2	49642668	49643668
chr3	146183929	146184929
chr16	30976984	30977984
chr6	114987431	114988431
chr14	47379634	47380634
chr13	48902444	48903444
chr17	33028045	33029045
chr10	62892446	62893446
chr6	60636750	60637750
chr14	28409151	28410151
chr19	23761403	23762403
chrX	84483235	84484235
chr5	148768341	148769341
chr15	101349923	101350923
chr16	91351975	91352975
chr8	93317320	93318320
chr8	36787958	36788958
chr11	90558887	90559887
chr10	93002246	93003246
chr12	114081697	114082697
chr17	11032727	11033727
chr4	3737099	3738099
chr6	30643233	30644233
chr11	75840832	75841832
chr16	38631899	38632899
chr15	82247621	82248621
chr5	110786243	110787243
chr6	112312279	112313279
chr16	11518826	11519826
chr1	194014139	194015139
chr15	77834025	77835025
chr19	55135162	55136162
chr18	78329536	78330536
chr6	29643680	29644680
chr6	108777975	108778975
chr6	48070814	48071814
chr6	145778320	145779320
chr17	48340369	48341369
chr13	100785067	100786067
chr1	169566832	169567832
chr5	35474111	35475111
chr6	113187253	113188253
chr2	172326565	172327565
chr15	85671058	85672058
chr3	53251824	53252824
chr10	98436985	98437985
chr18	66197719	66198719
chr19	15999076	16000076
chr9	17791766	17792766
chr13	37494755	37495755
chr14	69994178	69995178
chr11	17058686	17059686
chr3	95732591	95733591
chr15	85662228	85663228
chr11	61497040	61498040
chr4	143001810	143002810
chr4	45624726	45625726
chr11	31848873	31849873
chr14	19725440	19726440
chr2	11474763	11475763
chr7	80751385	80752385
chr3	121996531	121997531
chr1	120944268	120945268
chr1	157070981	157071981
chr1	39924454	39925454
chr19	36483702	36484702
chr15	99426524	99427524
chr1	185500195	185501195
chr8	74249124	74250124
chr2	116722251	116723251
chr11	87274980	87275980
chr6	48551559	48552559
chr6	147039489	147040489
chr2	51004241	51005241
chr10	80499530	80500530
chr11	79733091	79734091
chr5	104339694	104340694
chr6	55461412	55462412
chr17	86934875	86935875
chr12	118686545	118687545
chr6	29228702	29229702
chr1	8306758	8307758
chr15	101145902	101146902
chr3	122350584	122351584
chr4	117998749	117999749
chr18	4919980	4920980
chr1	191511689	191512689
chr10	8635236	8636236
chr18	66395737	66396737
chr11	109105548	109106548
chr8	36222060	36223060
chr6	56640905	56641905
chr1	53409057	53410057
chr1	89081096	89082096
chr2	162707867	162708867
chr8	49688505	49689505
chr4	141297501	141298501
chr17	73130813	73131813
chr16	91358422	91359422
chr5	145218151	145219151
chr4	47487030	47488030
chr5	115798607	115799607
chr13	98744506	98745506
chr5	35852920	35853920
chr9	62268575	62269575
chr6	136467162	136468162
chr3	88259958	88260958
chr11	77907642	77908642
chr13	94453025	94454025
chr2	154483315	154484315
chr11	23948923	23949923
chr1	108757168	108758168
chr10	117065959	117066959
chr5	34856193	34857193
chr15	38591105	38592105
chr8	4868468	4869468
chr16	5013341	5014341
chr18	70212451	70213451
chr8	18768588	18769588
chr8	72757876	72758876
chr7	85927471	85928471
chr7	127897890	127898890
chr3	132972548	132973548
chr6	146836485	146837485
chr7	97450406	97451406
chr4	108470770	108471770
chr8	86535630	86536630
chr3	89492290	89493290
chr8	92871811	92872811
chr6	83643489	83644489
chr12	5283517	5284517
chr2	91895173	91896173
chr11	55017310	55018310
chr18	66525945	66526945
chr6	6166716	6167716
chr10	119638845	119639845
chr4	98553526	98554526
chr17	69788214	69789214
chr17	33531053	33532053
chr16	19759769	19760769
chr6	112223161	112224161
chr8	101405962	101406962
chr5	91467395	91468395
chr17	17510544	17511544
chr5	91946126	91947126
chr9	31350583	31351583
chr10	23862267	23863267
chr13	39103359	39104359
chr2	121632273	121633273
chr1	168324536	168325536
chr18	3507360	3508360
chr18	61935918	61936918
chr9	111341024	111342024
chr4	117963538	117964538
chr5	104475501	104476501
chr19	21638320	21639320
chr7	112560089	112561089
chr8	118294591	118295591
chr15	84571698	84572698
chr7	142828803	142829803
chr2	167486616	167487616
chr1	40714476	40715476
chr6	70962372	70963372
chr4	133307102	133308102
chr3	107988719	107989719
chr19	56851168	56852168
chrY	346230	347230
chr11	66719042	66720042
chr4	45030993	45031993
chr9	107259675	107260675
chr7	56136578	56137578
chr15	85007692	85008692
chr1	184271304	184272304
chr13	49776990	49777990
chr7	4452797	4453797
chr5	117956183	117957183
chr18	34697547	34698547
chr2	56976045	56977045
chr6	128429461	128430461
chr9	102686374	102687374
chr12	103195892	103196892
chr6	30846360	30847360
chr15	97794168	97795168
chr11	120165984	120166984
chr9	48668273	48669273
chr3	106896632	106897632
chr19	40905160	40906160
chr3	108002928	108003928
chr7	87487526	87488526
chr1	136547949	136548949
chr4	65265432	65266432
chr1	154948315	154949315
chr7	17460006	17461006
chr4	128601919	128602919
chr2	148700818	148701818
chr3	154542152	154543152
chr16	93543644	93544644
chr5	65140314	65141314
chr2	122293070	122294070
chr17	85189400	85190400
chr7	28070410	28071410
chr13	55172411	55173411
chr8	48828462	48829462
chr10	122231069	122232069
chr11	66737618	66738618
chr2	170072835	170073835
chr9	120842337	120843337
chr12	73212876	73213876
chr9	72960729	72961729
chr7	75273642	75274642
chr5	148671635	148672635
chr3	103177665	103178665
chr12	110003619	110004619
chr4	148473217	148474217
chr7	96670408	96671408
chr4	142610825	142611825
chr16	10088555	10089555
chr12	17541785	17542785
chr17	50609853	50610853
chr6	73317361	73318361
chr16	45684631	45685631
chr4	101039550	101040550
chr10	44248779	44249779
chr4	49334778	49335778
chr7	52437245	52438245
chr6	113962462	113963462
chr10	97956707	97957707
chr11	80100347	80101347
chr12	113005487	113006487
chr15	96173047	96174047
chr17	27109625	27110625
chr3	28679665	28680665
chr4	53171169	53172169
chr15	44270385	44271385
chr10	86487327	86488327
chr11	110398547	110399547
chr2	153434973	153435973
chr5	138663045	138664045
chr10	82363897	82364897
chr13	120217193	120218193
chr7	28337671	28338671
chr10	84348539	84349539
chr11	60917512	60918512
chr1	122161419	122162419
chr8	55614922	55615922
chr14	61143854	61144854
chr4	120887214	120888214
chr5	25211125	25212125
chr12	80713416	80714416
chr17	33391594	33392594
chr10	80023785	80024785
chr6	147188421	147189421
chr4	129865887	129866887
chr11	100406458	100407458
chr10	41402236	41403236
chr9	85642536	85643536
chr2	33342097	33343097
chr11	97176546	97177546
chr17	48138638	48139638
chr2	113663721	113664721
chr18	77952783	77953783
chr5	75552750	75553750
chr5	122160984	122161984
chr2	71205194	71206194
chr1	89142434	89143434
chr10	32032329	32033329
chr2	12340579	12341579
chr3	94963771	94964771
chr1	83742328	83743328
chr10	43790599	43791599
chr7	46971362	46972362
chr2	103264471	103265471
chr7	26576886	26577886
chr13	99068627	99069627
chr19	4206687	4207687
chr13	104434181	104435181
chr8	90722533	90723533
chr13	104450501	104451501
chr5	99586689	99587689
chr6	146380401	146381401
chr5	23808738	23809738
chr1	64494318	64495318
chr4	117609335	117610335
chr4	107435906	107436906
chr7	80567037	80568037
chr15	57966198	57967198
chr4	45618314	45619314
chr1	89094335	89095335
chr5	99681509	99682509
chr12	4578422	4579422
chr12	9008477	9009477
chr14	87540539	87541539
chr18	62339199	62340199
chr3	21659542	21660542
chr12	30567753	30568753
chr11	111384466	111385466
chr15	77711878	77712878
chr8	97778446	97779446
chr12	21378988	21379988
chr6	147949302	147950302
chr10	79635471	79636471
chr11	98902320	98903320
chr17	44393244	44394244
chr1	23833645	23834645
chr4	122727675	122728675
chr14	70000543	70001543
chr12	85401560	85402560
chr15	6964743	6965743
chr17	44215303	44216303
chr15	97497534	97498534
chr5	77783188	77784188
chr3	94246741	94247741
chr7	138703385	138704385
chr12	8980337	8981337
chr15	79073288	79074288
chr15	91403233	91404233
chr1	191796578	191797578
chrX	20239483	20240483
chr3	65666904	65667904
chr8	72690292	72691292
chr7	136450157	136451157
chr4	137262867	137263867
chr5	118604936	118605936
chr1	59466145	59467145
chr3	153498299	153499299
chrY	1752122	1753122
chr17	8056323	8057323
chr6	118511901	118512901
chr4	53172387	53173387
chr17	79335987	79336987
chr2	128926303	128927303
chr8	125841940	125842940
chr6	108722635	108723635
chr11	59778920	59779920
chr19	28085206	28086206
chr5	148569319	148570319
chr8	18935908	18936908
chr6	82602490	82603490
chr8	114534780	114535780
chr18	61008187	61009187
chr9	27106267	27107267
chr17	47505315	47506315
chr6	137079602	137080602
chr9	114492559	114493559
chr12	27744413	27745413
chr13	76193338	76194338
chr7	151093004	151094004
chr3	37379805	37380805
chr6	33415865	33416865
chr8	75873961	75874961
chr1	140476098	140477098
chr11	96771002	96772002
chr5	23605884	23606884
chr16	98303221	98304221
chr6	146773211	146774211
chr11	67341035	67342035
chr7	144628762	144629762
chr11	102853936	102854936
chr2	131317059	131318059
chr12	110240878	110241878
chr11	59652283	59653283
chr6	116213727	116214727
chr13	42670756	42671756
chr2	78628038	78629038
chr2	61549328	61550328
chr11	77743903	77744903
chr16	21165598	21166598
chr18	40378601	40379601
chr6	42594709	42595709
chr17	43366504	43367504
chr4	134409462	134410462
chr7	133343495	133344495
chr16	32419328	32420328
chr16	75592594	75593594
chr10	98991534	98992534
chr15	79638210	79639210
chr7	112729402	112730402
chr11	80164979	80165979
chr18	57084719	57085719
chr2	33537469	33538469
chr2	146337421	146338421
chr6	5595144	5596144
chr1	55083846	55084846
chr15	98462260	98463260
chr16	18119135	18120135
chr8	109084680	109085680
chr11	55202976	55203976
chr11	5661577	5662577
chr6	117775063	117776063
chr9	32503098	32504098
chr9	70269003	70270003
chr4	106144628	106145628
chr13	91363055	91364055
chrX	72942816	72943816
chr1	23235018	23236018
chr19	12669650	12670650
chr13	99086510	99087510
chr5	51797475	51798475
chr8	35103198	35104198
chr3	145735439	145736439
chr12	29273979	29274979
chr10	51852886	51853886
chr19	42007390	42008390
chr10	8838734	8839734
chr1	158488292	158489292
chr14	76549376	76550376
chr1	139794559	139795559
chr12	93115790	93116790
chr4	108292041	108293041
chr11	31613330	31614330
chr13	21559947	21560947
chrY	1793117	1794117
chr11	73037169	73038169
chr2	147633490	147634490
chr5	117737146	117738146
chr6	120306962	120307962
chr7	111348046	111349046
chr9	61874166	61875166
chr16	66086450	66087450
chr4	101029708	101030708
chr16	55965939	55966939
chr9	100346271	100347271
chr13	99788545	99789545
chr8	8660884	8661884
chr6	8036476	8037476
chr7	25149513	25150513
chr15	78672495	78673495
chr12	25359933	25360933
chr3	127704503	127705503
chr8	93593459	93594459
chr1	94802998	94803998
chr12	32238950	32239950
chr9	113554337	113555337
chr16	21204152	21205152
chr2	155755322	155756322
chr5	116294656	116295656
chr3	98027808	98028808
chr8	45541296	45542296
chr2	147563710	147564710
chr13	52753507	52754507
chr3	136370918	136371918
chr8	119779923	119780923
chr14	55259706	55260706
chr3	58460966	58461966
chr7	97129313	97130313
chr12	92661273	92662273
chr18	35699409	35700409
chr11	49714928	49715928
chr17	71608770	71609770
chr18	24112645	24113645
chr7	150692282	150693282
chrX	11243298	11244298
chr11	32104833	32105833
chr3	33854843	33855843
chr5	21151145	21152145
chr5	46738307	46739307
chr9	46080728	46081728
chr10	81326071	81327071
chr15	89041445	89042445
chr19	4942654	4943654
chr10	96838159	96839159
chr11	85166119	85167119
chr11	90278915	90279915
chr11	115424992	115425992
chr19	47806158	47807158
chr15	27849002	27850002
chr18	64266373	64267373
chr2	30554971	30555971
chr6	118369122	118370122
chr6	128374169	128375169
chr19	45284141	45285141
chr4	111558936	111559936
chr5	37500396	37501396
chr13	41174541	41175541
chr3	27837613	27838613
chr16	37682362	37683362
chr10	95207547	95208547
chr5	92950744	92951744
chr3	67371859	67372859
chr14	58189950	58190950
chr6	6905545	6906545
chr5	31865627	31866627
chr5	148740016	148741016
chr1	54495321	54496321
chr18	80243086	80244086
chr11	119803756	119804756
chr7	6192165	6193165
chr2	58968799	58969799
chr4	133330203	133331203
chr3	144062394	144063394
chr13	98800925	98801925
chr14	56822486	56823486
chr2	29745446	29746446
chr18	14840799	14841799
chr12	84184102	84185102
chr16	16358597	16359597
chr2	29682337	29683337
chr3	89534070	89535070
chr13	40817882	40818882
chr14	27353952	27354952
chr3	96568145	96569145
chr5	120162531	120163531
chr9	109833672	109834672
chr1	159015971	159016971
chr7	50721420	50722420
chr8	114515700	114516700
chr12	105855312	105856312
chr5	33677598	33678598
chr1	58561293	58562293
chr13	73740946	73741946
chr18	24363970	24364970
chr1	83155770	83156770
chr14	34772258	34773258
chr11	78510472	78511472
chr5	31796635	31797635
chr2	31770329	31771329
chr18	64269905	64270905
chr19	47805533	47806533
chr11	115063334	115064334
chr18	75978366	75979366
chr14	31764072	31765072
chr18	42748793	42749793
chr17	88090985	88091985
chr11	60267552	60268552
chr7	134655475	134656475
chr9	122025909	122026909
chr4	120689427	120690427
chr11	94903146	94904146
chr18	78320400	78321400
chr7	103667416	103668416
chr11	33062721	33063721
chr6	86387834	86388834
chr3	57651019	57652019
chr5	17079921	17080921
chr1	137326544	137327544
chr1	173043686	173044686
chr9	13693790	13694790
chr11	30853793	30854793
chr4	124035372	124036372
chr16	98243797	98244797
chr15	98364316	98365316
chr15	7554556	7555556
chr7	147680307	147681307
chr19	44322320	44323320
chr11	20699999	20700999
chr15	39692425	39693425
chr16	44016002	44017002
chr1	91839466	91840466
chr9	37062570	37063570
chr2	77179677	77180677
chr4	114320024	114321024
chr9	35074903	35075903
chr11	76015017	76016017
chr11	114626162	114627162
chrX	50264856	50265856
chr4	106134310	106135310
chr5	73038499	73039499
chr1	34658878	34659878
chr7	106773991	106774991
chr11	61861037	61862037
chr2	134469368	134470368
chr1	44186766	44187766
chr11	3813390	3814390
chr2	30797846	30798846
chr11	68245077	68246077
chr12	12330048	12331048
chr15	80501653	80502653
chr1	79577701	79578701
chr2	135264919	135265919
chr3	116564072	116565072
chr6	43293291	43294291
chr8	10634158	10635158
chr7	6893180	6894180
chr5	52523049	52524049
chr18	4352456	4353456
chr7	56500883	56501883
chr7	104519663	104520663
chr8	60278865	60279865
chr12	76927598	76928598
chr13	3373905	3374905
chr1	87831763	87832763
chr13	97777058	97778058
chr6	135394325	135395325
chr8	87643127	87644127
chr8	97125231	97126231
chr13	85328447	85329447
chr16	18686705	18687705
chr7	63049078	63050078
chr12	107247966	107248966
chr3	67436210	67437210
chr4	128560281	128561281
chr5	136542272	136543272
chr1	62746108	62747108
chr3	36450957	36451957
chr5	45884074	45885074
chr8	93594144	93595144
chr3	88329837	88330837
chr4	102786431	102787431
chr11	110925642	110926642
chr3	131270800	131271800
chr5	129513969	129514969
chr5	140894799	140895799
chr12	75417650	75418650
chr19	43645190	43646190
chr13	114584128	114585128
chr4	151656944	151657944
chr17	51318323	51319323
chr2	37307308	37308308
chr5	137434803	137435803
chr8	118272281	118273281
chr14	76690167	76691167
chr4	33105018	33106018
chr11	20300549	20301549
chr15	101227801	101228801
chr2	94018659	94019659
chr6	66845916	66846916
chr13	56260327	56261327
chr15	8118476	8119476
chr15	101676076	101677076
chr19	18909150	18910150
chr12	87070002	87071002
chr1	174480375	174481375
chr12	25335575	25336575
chr5	137408820	137409820
chr9	110959315	110960315
chr11	32247253	32248253
chr11	88684018	88685018
chr15	11925301	11926301
chr17	5937989	5938989
chr18	35821383	35822383
chr8	86879996	86880996
chr2	75574877	75575877
chr9	20837354	20838354
chr11	82728208	82729208
chr15	61814517	61815517
chr2	74892897	74893897
chr18	82934343	82935343
chr11	74184828	74185828
chr13	62567800	62568800
chr17	56896526	56897526
chr18	25645070	25646070
chr2	30319154	30320154
chr5	138414657	138415657
chr9	36604492	36605492
chr15	79572517	79573517
chr8	14992408	14993408
chr2	25477046	25478046
chr10	81166925	81167925
chr9	121194585	121195585
chr1	121317237	121318237
chr12	80273261	80274261
chr5	123299571	123300571
chr4	35122526	35123526
chr12	29436157	29437157
chr13	95638282	95639282
chr17	86544084	86545084
chr6	140248676	140249676
chr1	170362084	170363084
chr7	31064981	31065981
chr7	74344007	74345007
chr10	60514654	60515654
chr9	51572887	51573887
chr10	76880564	76881564
chr11	94538303	94539303
chr11	3734017	3735017
chr17	24769092	24770092
chr4	53319666	53320666
chr3	103082815	103083815
chr8	112741249	112742249
chr12	100645234	100646234
chr2	158478415	158479415
chr5	35447870	35448870
chr5	64202749	64203749
chr6	29477610	29478610
chr10	34016730	34017730
chr11	3308743	3309743
chr11	70795996	70796996
chr2	25193617	25194617
chr4	48485808	48486808
chr10	87841399	87842399
chr11	31849173	31850173
chr13	12302238	12303238
chr7	129394892	129395892
chr16	91081438	91082438
chr3	108003303	108004303
chr6	128998772	128999772
chr12	88177348	88178348
chr1	94791380	94792380
chr1	106936067	106937067
chr17	83614102	83615102
chr13	36345050	36346050
chr2	151907181	151908181
chr15	102206831	102207831
chr8	94325463	94326463
chr1	141350796	141351796
chr15	96337589	96338589
chr17	45388101	45389101
chr2	172765351	172766351
chr6	54917286	54918286
chr1	57029787	57030787
chr2	120454240	120455240
chr1	166975877	166976877
chr1	173048101	173049101
chr10	33739022	33740022
chr14	23397111	23398111
chr14	99802040	99803040
chr18	38906173	38907173
chr3	88281333	88282333
chr3	134961264	134962264
chr5	42235031	42236031
chr8	77736534	77737534
chr9	104298641	104299641
chr10	40602749	40603749
chr15	93228258	93229258
chr4	129373600	129374600
chr8	86760622	86761622
chr13	109004016	109005016
chr11	109099664	109100664
chr12	71162762	71163762
chr6	34242555	34243555
chr10	62891879	62892879
chr1	93390684	93391684
chr2	3391852	3392852
chr6	51158644	51159644
chr9	119489470	119490470
chr13	101172607	101173607
chr15	82101327	82102327
chr11	85657307	85658307
chr13	32994781	32995781
chr2	146047069	146048069
chr4	144908920	144909920
chr10	80450494	80451494
chr11	70264821	70265821
chr13	113825777	113826777
chr16	17722528	17723528
chr12	117500948	117501948
chr13	73402679	73403679
chr2	164232876	164233876
chr17	34462087	34463087
chr6	141100597	141101597
chr8	3386945	3387945
chr9	35377335	35378335
chr11	118883799	118884799
chr15	82817842	82818842
chr18	7701762	7702762
chr4	83633028	83634028
chr6	114200020	114201020
chr8	14089877	14090877
chr3	91951045	91952045
chr1	36121439	36122439
chr3	144508370	144509370
chr4	46614319	46615319
chr4	154487448	154488448
chr12	75065009	75066009
chr16	5255688	5256688
chr10	81063255	81064255
chr12	82208472	82209472
chr12	86559830	86560830
chr17	87929490	87930490
chr1	179638356	179639356
chr10	53795141	53796141
chr4	16090691	16091691
chr17	31397088	31398088
chr18	24688176	24689176
chr3	55030478	55031478
chr3	118264497	118265497
chr12	105304204	105305204
chr3	100720400	100721400
chr9	7763477	7764477
chr1	64168444	64169444
chr14	47323598	47324598
chr17	48741535	48742535
chr2	127008244	127009244
chr8	114456099	114457099
chr2	38781804	38782804
chr15	82751195	82752195
chr6	112323853	112324853
chr8	125243938	125244938
chr13	40938530	40939530
chr16	44620387	44621387
chr3	98030799	98031799
chr12	55514896	55515896
chr18	24236516	24237516
chr3	108247655	108248655
chr17	25715554	25716554
chr17	88035416	88036416
chr17	88071292	88072292
chr5	3647488	3648488
chr7	121835561	121836561
chr8	73024491	73025491
chr14	66544179	66545179
chr11	30671222	30672222
chr11	119051428	119052428
chr16	97493574	97494574
chr7	86068855	86069855
chr19	46647281	46648281
chr3	96023176	96024176
chr17	47930026	47931026
chr8	8733489	8734489
chr11	58215318	58216318
chr12	73765297	73766297
chr2	150735091	150736091
chr4	124334256	124335256
chr7	135488108	135489108
chr8	112261124	112262124
chr9	37270014	37271014
chr18	88939582	88940582
chr7	123751662	123752662
chr8	107821059	107822059
chr4	138101871	138102871
chr11	59263052	59264052
chr14	80439414	80440414
chr6	113256090	113257090
chr12	37440279	37441279
chr13	49544489	49545489
chr5	104762051	104763051
chr3	19062543	19063543
chr14	67491868	67492868
chr8	72397718	72398718
chr1	93194348	93195348
chr10	127895766	127896766
chr13	107726580	107727580
chr15	32119879	32120879
chr2	162756370	162757370
chr1	23769326	23770326
chr10	20908464	20909464
chr15	79297010	79298010
chr3	61167995	61168995
chr5	102129241	102130241
chr7	75514264	75515264
chr6	13627548	13628548
chr16	98302709	98303709
chr3	37210990	37211990
chr10	92754261	92755261
chr11	51780621	51781621
chr2	130731728	130732728
chr7	16637797	16638797
chr14	33294938	33295938
chr16	17201095	17202095
chr2	132310883	132311883
chr10	126394490	126395490
chr8	47295306	47296306
chr9	62828311	62829311
chr5	42098530	42099530
chr5	64460960	64461960
chr5	126320977	126321977
chr10	66315682	66316682
chr15	102033475	102034475
chr18	64114995	64115995
chr2	128189681	128190681
chr4	149049723	149050723
chr6	29114167	29115167
chr8	74446150	74447150
chr10	25078647	25079647
chr11	96482178	96483178
chr12	75110084	75111084
chr12	100644850	100645850
chr12	110232563	110233563
chr4	41660093	41661093
chr4	59047512	59048512
chr4	137771980	137772980
chr9	50975786	50976786
chr11	84242769	84243769
chr12	101369583	101370583
chr2	165354289	165355289
chr7	120063069	120064069
chr8	24913036	24914036
chrX	121263798	121264798
chr1	173309721	173310721
chr11	106772252	106773252
chr5	31077112	31078112
chr16	42955200	42956200
chr5	150040344	150041344
chr1	165709274	165710274
chr2	135783198	135784198
chr2	157971679	157972679
chr6	92190880	92191880
chr12	78289832	78290832
chr12	8818092	8819092
chr14	122580450	122581450
chr3	83938967	83939967
chr2	146040191	146041191
chr4	55362207	55363207
chr4	116136363	116137363
chr3	38119553	38120553
chr4	154010750	154011750
chr12	11156669	11157669
chr12	83801587	83802587
chr16	39048731	39049731
chr5	148130914	148131914
chr1	107676760	107677760
chr10	45297133	45298133
chr13	43879947	43880947
chr6	40385700	40386700
chr9	37338123	37339123
chr12	77296677	77297677
chr5	111759172	111760172
chr1	155741778	155742778
chr1	188855381	188856381
chr13	49066130	49067130
chr4	147412460	147413460
chr5	115168752	115169752
chr14	54257024	54258024
chr18	39049590	39050590
chr2	155554622	155555622
chr10	39861623	39862623
chr3	107159733	107160733
chr6	83391170	83392170
chrX	53259410	53260410
chr12	26062591	26063591
chr18	67247417	67248417
chr9	50969548	50970548
chr13	110566000	110567000
chr16	25407193	25408193
chr14	104425999	104426999
chr7	87133296	87134296
chr9	32008110	32009110
chr10	58137989	58138989
chr11	101072928	101073928
chr4	3340706	3341706
chr6	83640002	83641002
chr9	40564167	40565167
chr13	12612188	12613188
chr18	69667120	69668120
chr2	127412418	127413418
chr11	102786000	102787000
chr11	113158795	113159795
chr17	13375217	13376217
chr10	60861830	60862830
chr13	103434658	103435658
chr2	127409887	127410887
chr8	4656278	4657278
chr1	167693348	167694348
chr7	97574433	97575433
chr11	101901183	101902183
chr1	74819378	74820378
chr18	21280150	21281150
chr2	84729788	84730788
chr5	120565959	120566959
chr6	120488758	120489758
chr11	43307208	43308208
chr15	95597935	95598935
chr4	69925900	69926900
chr9	42003507	42004507
chr9	66158950	66159950
chr19	29715247	29716247
chr7	35460883	35461883
chr8	47396220	47397220
chr11	22517209	22518209
chr12	66018388	66019388
chr14	21553359	21554359
chr2	4514167	4515167
chr2	91767726	91768726
chr2	173411803	173412803
chr9	46450512	46451512
chr6	54631237	54632237
chr1	87904083	87905083
chr18	9865393	9866393
chr2	90452075	90453075
chr9	21960755	21961755
chr15	93148924	93149924
chr1	89368868	89369868
chr18	62090968	62091968
chr2	18742979	18743979
chr2	145525118	145526118
chrX	160513998	160514998
chr11	59652871	59653871
chr18	37803380	37804380
chr5	73030997	73031997
chr11	115336451	115337451
chr4	147965069	147966069
chr1	121912509	121913509
chr12	29515601	29516601
chr8	26154320	26155320
chr12	55669257	55670257
chr3	27135861	27136861
chr7	151282922	151283922
chr8	27268080	27269080
chr9	123697981	123698981
chr12	33741830	33742830
chr18	74561740	74562740
chr2	94130364	94131364
chr4	129875907	129876907
chr6	140902063	140903063
chr8	92308594	92309594
chr9	105519294	105520294
chr10	40021602	40022602
chr5	137774297	137775297
chr6	11875362	11876362
chr6	67073811	67074811
chr2	105744204	105745204
chr10	5724917	5725917
chr12	17259550	17260550
chr14	80060627	80061627
chr2	31114148	31115148
chr4	14753175	14754175
chr4	19827955	19828955
chr5	96412501	96413501
chr4	116923998	116924998
chr5	100858154	100859154
chr7	108986401	108987401
chr8	86296646	86297646
chr9	119310647	119311647
chr13	62725042	62726042
chr1	20809999	20810999
chr10	79908703	79909703
chr4	98942898	98943898
chr11	58660092	58661092
chr11	94426181	94427181
chr2	169880597	169881597
chr1	58026455	58027455
chr11	17157146	17158146
chr15	25567210	25568210
chr7	125272721	125273721
chr1	107710685	107711685
chr10	82682153	82683153
chr1	180335327	180336327
chr10	69557342	69558342
chr19	34574958	34575958
chr7	97624160	97625160
chr8	129855370	129856370
chr15	67305589	67306589
chr16	43211720	43212720
chr17	46464593	46465593
chr1	120777195	120778195
chr13	48877832	48878832
chr1	95669926	95670926
chr17	5940876	5941876
chr17	36393835	36394835
chr2	70893302	70894302
chr6	34296273	34297273
chr6	135335427	135336427
chr9	103109805	103110805
chr4	124613629	124614629
chr2	164214995	164215995
chr3	101099107	101100107
chr7	29096601	29097601
chr9	72017401	72018401
chr12	109995693	109996693
chr19	45510241	45511241
chr17	45539894	45540894
chr5	74673440	74674440
chr10	18463085	18464085
chr17	24387953	24388953
chr4	86502799	86503799
chr9	54524001	54525001
chr5	125048202	125049202
chr16	38902052	38903052
chr6	136978315	136979315
chr6	140872821	140873821
chr8	49101565	49102565
chr10	111409215	111410215
chr11	106781505	106782505
chr17	45903594	45904594
chr5	48373849	48374849
chr9	106724439	106725439
chr2	165794606	165795606
chr8	59990018	59991018
chr12	8927931	8928931
chr12	100388011	100389011
chr16	13436835	13437835
chr8	118290047	118291047
chr4	138153423	138154423
chr9	97072218	97073218
chr1	90602052	90603052
chr4	49644338	49645338
chrX	157836728	157837728
chr2	68622499	68623499
chr7	143959687	143960687
chr17	29985490	29986490
chr4	153515977	153516977
chr2	45364855	45365855
chr3	99965932	99966932
chr7	26180545	26181545
chr10	40738394	40739394
chr12	31941045	31942045
chr4	33316382	33317382
chr5	126315431	126316431
chr9	104171498	104172498
chr16	18127070	18128070
chr2	92885353	92886353
chr6	29866483	29867483
chr5	114758708	114759708
chr1	172892121	172893121
chr11	101771273	101772273
chr15	84981495	84982495
chr1	39535167	39536167
chr1	120285434	120286434
chr11	106873541	106874541
chr13	13682121	13683121
chr7	53190179	53191179
chr9	121280293	121281293
chr9	103014369	103015369
chr11	5661939	5662939
chr13	6546832	6547832
chr14	35047887	35048887
chr15	31153581	31154581
chr16	87796722	87797722
chr17	46865676	46866676
chr4	97988629	97989629
chr9	99336637	99337637
chr12	74077378	74078378
chr13	93253474	93254474
chr2	130968082	130969082
chr1	137649236	137650236
chr4	129373306	129374306
chr4	155609571	155610571
chr5	110605057	110606057
chr4	42962115	42963115
chr1	165492099	165493099
chr19	25619883	25620883
chr1	107787357	107788357
chr7	142823135	142824135
chr15	5408796	5409796
chr3	121114051	121115051
chr1	130488461	130489461
chr10	75260832	75261832
chr11	43742478	43743478
chr12	21548816	21549816
chr14	57463068	57464068
chr16	75826946	75827946
chr17	46520088	46521088
chr18	42629323	42630323
chr19	5294933	5295933
chr5	30949779	30950779
chr8	73277966	73278966
chr11	98126021	98127021
chr17	47729833	47730833
chr8	129662747	129663747
chr1	107210431	107211431
chr10	26093426	26094426
chr13	96159851	96160851
chr14	56158632	56159632
chr2	103668789	103669789
chr6	7794152	7795152
chr9	104263621	104264621
chr7	20043654	20044654
chr7	114931462	114932462
chr6	121059990	121060990
chr7	106807566	106808566
chr15	38174280	38175280
chr15	79757737	79758737
chr15	99200420	99201420
chr19	40345642	40346642
chr2	143664156	143665156
chr10	77531488	77532488
chr10	77647448	77648448
chr15	57743216	57744216
chr16	4333078	4334078
chr18	12899259	12900259
chr19	53674024	53675024
chr4	124791533	124792533
chr5	122553904	122554904
chr1	184312864	184313864
chr3	87214768	87215768
chr4	111558242	111559242
chr8	112669126	112670126
chr15	102073561	102074561
chr3	88351736	88352736
chr5	65590426	65591426
chr6	42330104	42331104
chr17	45615108	45616108
chr2	31993097	31994097
chr11	57362109	57363109
chr13	97822265	97823265
chr16	45944839	45945839
chr2	140220562	140221562
chr3	97485475	97486475
chr4	86519703	86520703
chr4	148423389	148424389
chr8	111410221	111411221
chr1	185857707	185858707
chr2	150611934	150612934
chr2	152560314	152561314
chr7	71131481	71132481
chr1	161161833	161162833
chr11	52110549	52111549
chr11	103029629	103030629
chr12	36941379	36942379
chr13	62484162	62485162
chr2	154125979	154126979
chr2	156104078	156105078
chr2	160404143	160405143
chr8	36219039	36220039
chr1	89744817	89745817
chr12	114135685	114136685
chr3	95160658	95161658
chr3	94845973	94846973
chr4	89189964	89190964
chr7	139743100	139744100
chr9	105759829	105760829
chr16	91646752	91647752
chr18	66200532	66201532
chr18	77844875	77845875
chr4	89019363	89020363
chr4	149180528	149181528
chr5	122110055	122111055
chr7	35880002	35881002
chr7	120521097	120522097
chr15	89421809	89422809
chr19	5272723	5273723
chr1	67243638	67244638
chr14	45838669	45839669
chr7	16806952	16807952
chr7	90014247	90015247
chr9	35007074	35008074
chr1	188528700	188529700
chr11	20693885	20694885
chr14	34026641	34027641
chr7	28964556	28965556
chr8	74899879	74900879
chr16	36827944	36828944
chr16	93883571	93884571
chr2	25283649	25284649
chr6	116623637	116624637
chr6	135202431	135203431
chr6	122506678	122507678
chr9	56483751	56484751
chr12	101842445	101843445
chr7	144085665	144086665
chr9	66185653	66186653
chr6	54346723	54347723
chr17	88928857	88929857
chr7	97460674	97461674
chr9	120049441	120050441
chr1	193915943	193916943
chr11	72990118	72991118
chr2	113688653	113689653
chr8	24318396	24319396
chr19	10092179	10093179
chr1	61433653	61434653
chr2	127509366	127510366
chr6	133055208	133056208
chr7	75725228	75726228
chr9	64472062	64473062
chr1	137436544	137437544
chr14	79986604	79987604
chr11	20694330	20695330
chr13	101661817	101662817
chr16	93608682	93609682
chr5	130639245	130640245
chr5	137896797	137897797
chr6	148302631	148303631
chr1	7387768	7388768
chr6	39327186	39328186
chr6	97422611	97423611
chr1	15909835	15910835
chr1	66863707	66864707
chr10	84084544	84085544
chr17	85502353	85503353
chr18	12326656	12327656
chr4	137990007	137991007
chr8	86145865	86146865
chr9	62695232	62696232
chr12	33998653	33999653
chr3	143265360	143266360
chr7	31961895	31962895
chr11	26861267	26862267
chr11	117245912	117246912
chr7	87519957	87520957
chr7	142594835	142595835
chr9	14503166	14504166
chr16	91372516	91373516
chr9	71679288	71680288
chr16	36597998	36598998
chr17	35315159	35316159
chr3	31103814	31104814
chr5	110771569	110772569
chr6	126889146	126890146
chr14	55482501	55483501
chr18	44539659	44540659
chr7	133844299	133845299
chr8	13494031	13495031
chr9	54407581	54408581
chr10	6011553	6012553
chr14	8598103	8599103
chr14	121778146	121779146
chr2	14179712	14180712
chr4	122757726	122758726
chr5	63157020	63158020
chr1	57906422	57907422
chr1	184889933	184890933
chr12	8494791	8495791
chr19	42329669	42330669
chr2	118860081	118861081
chr4	73897257	73898257
chr4	134994802	134995802
chr5	138704736	138705736
chr8	23421647	23422647
chr2	34501531	34502531
chr15	89063719	89064719
chr13	6575059	6576059
chr13	96661504	96662504
chr14	22800346	22801346
chr15	73554685	73555685
chr16	17489231	17490231
chr4	44246457	44247457
chr5	118694641	118695641
chr5	138069623	138070623
chr7	86373060	86374060
chr1	163125823	163126823
chr1	183309468	183310468
chr12	12799862	12800862
chr7	112663376	112664376
chr17	22362218	22363218
chr18	82737366	82738366
chr19	24489968	24490968
chr5	114625381	114626381
chr10	94453813	94454813
chr12	118688293	118689293
chr2	3035143	3036143
chr15	57692672	57693672
chr19	45005033	45006033
chr3	131227283	131228283
chr4	6274088	6275088
chr9	25058871	25059871
chr11	85165667	85166667
chr1	34489672	34490672
chr1	40142244	40143244
chr1	133554341	133555341
chr10	6401998	6402998
chr13	120201617	120202617
chr4	62875882	62876882
chr19	42203117	42204117
chr7	123647305	123648305
chr2	72818153	72819153
chr19	40686322	40687322
chr11	32997557	32998557
chr3	118131154	118132154
chr3	146006279	146007279
chr9	40443843	40444843
chr10	62382890	62383890
chr12	70269005	70270005
chr18	65172795	65173795
chr6	72943021	72944021
chr6	128250057	128251057
chr11	17111434	17112434
chr10	94086027	94087027
chr5	44659452	44660452
chr1	140471922	140472922
chr1	155248546	155249546
chr1	180456954	180457954
chr13	62861534	62862534
chr15	96766877	96767877
chr17	29484394	29485394
chr2	129122502	129123502
chr2	131735215	131736215
chr2	153620565	153621565
chr5	123865839	123866839
chr7	138553640	138554640
chrX	51379789	51380789
chr19	46673008	46674008
chr10	83977910	83978910
chr11	119874111	119875111
chr13	54472624	54473624
chr13	111879257	111880257
chr14	73845414	73846414
chr15	43308177	43309177
chr18	24364495	24365495
chr19	44493179	44494179
chr5	144735844	144736844
chr9	110773217	110774217
chr14	26886443	26887443
chr14	28241516	28242516
chr14	77185790	77186790
chr15	61770598	61771598
chr16	62786110	62787110
chr17	23012946	23013946
chr2	164417259	164418259
chr9	54828671	54829671
chr11	53520321	53521321
chr15	57431826	57432826
chr17	75209870	75210870
chr1	23389681	23390681
chr10	110446274	110447274
chr13	67626676	67627676
chr18	70689413	70690413
chr2	34654810	34655810
chr2	165604115	165605115
chr3	51954765	51955765
chr6	83275829	83276829
chr9	77764650	77765650
chr9	114997073	114998073
chr1	62617534	62618534
chr11	63077573	63078573
chr7	125603160	125604160
chr11	20590755	20591755
chr15	101368326	101369326
chr16	10846304	10847304
chr18	77285302	77286302
chr8	123157895	123158895
chr1	107890113	107891113
chr15	102033974	102034974
chr6	95668351	95669351
chr6	112896792	112897792
chr17	43803609	43804609
chr2	31238181	31239181
chr2	58329036	58330036
chr3	101016785	101017785
chr4	122931492	122932492
chr1	55293492	55294492
chr1	108324426	108325426
chr11	20691062	20692062
chr14	33201102	33202102
chr2	13158845	13159845
chr7	87169656	87170656
chr9	83818205	83819205
chr2	179759023	179760023
chr13	112221015	112222015
chr1	54851319	54852319
chr14	77116581	77117581
chr16	5146483	5147483
chr16	91464780	91465780
chr17	45732036	45733036
chr3	4064524	4065524
chr4	83062962	83063962
chr5	37130817	37131817
chr5	75551904	75552904
chr5	136559248	136560248
chr5	148134820	148135820
chr7	133415492	133416492
chr9	57503288	57504288
chr2	58694561	58695561
chr2	156699087	156700087
chr3	51891964	51892964
chr7	119612998	119613998
chr18	75757319	75758319
chr3	101630829	101631829
chr7	17430057	17431057
chr9	119065068	119066068
chrX	96273579	96274579
chr9	65141548	65142548
chr1	44158747	44159747
chr11	102807611	102808611
chr15	96306475	96307475
chr16	37946942	37947942
chr19	4720523	4721523
chr2	34726109	34727109
chr2	75802175	75803175
chr5	35367350	35368350
chr5	115089083	115090083
chr8	48019955	48020955
chr8	127044213	127045213
chrY	1266235	1267235
chr17	50684361	50685361
chr19	44358322	44359322
chr1	180393550	180394550
chr1	107709582	107710582
chr17	56618522	56619522
chr3	96657995	96658995
chr8	72149086	72150086
chr8	111435101	111436101
chr9	59464592	59465592
chr15	98507463	98508463
chr17	46689364	46690364
chr4	89016460	89017460
chr5	65498191	65499191
chr6	54649133	54650133
chr12	83134201	83135201
chr13	19790309	19791309
chr3	83993327	83994327
chr7	91927767	91928767
chr10	105011994	105012994
chr14	28554440	28555440
chr14	115439521	115440521
chr15	37043515	37044515
chr5	36137781	36138781
chr7	104480344	104481344
chr8	47798967	47799967
chrX	8469639	8470639
chr14	30256010	30257010
chr15	52543482	52544482
chr16	38562389	38563389
chr5	145529168	145530168
chr6	49468748	49469748
chr7	30875012	30876012
chrX	72911389	72912389
chr15	58764850	58765850
chr7	19477239	19478239
chr7	134716263	134717263
chr3	107415517	107416517
chr5	38476967	38477967
chr9	99746958	99747958
chr15	35084963	35085963
chr15	93166912	93167912
chr4	11681973	11682973
chr5	53981108	53982108
chr1	191524568	191525568
chr2	120304061	120305061
chr10	20756886	20757886
chr11	68298398	68299398
chr14	46277446	46278446
chr18	78334702	78335702
chr18	88942191	88943191
chr5	92080048	92081048
chr6	135098239	135099239
chr9	77229066	77230066
chr12	117440758	117441758
chr15	84114171	84115171
chr17	86462509	86463509
chr18	69752514	69753514
chr2	180513838	180514838
chr4	104989125	104990125
chr5	46350909	46351909
chr5	69983097	69984097
chr5	135726648	135727648
chr6	13019342	13020342
chr7	38892315	38893315
chr10	80568188	80569188
chr3	108919714	108920714
chr7	77479472	77480472
chr15	6030412	6031412
chr18	66392608	66393608
chr2	122394874	122395874
chr7	126162768	126163768
chr11	74432326	74433326
chr11	96132661	96133661
chr13	81922200	81923200
chr18	12491922	12492922
chr19	5653863	5654863
chr19	38327982	38328982
chr5	21290507	21291507
chr5	38699824	38700824
chr5	104585040	104586040
chr7	111463250	111464250
chr8	107178591	107179591
chr10	106022436	106023436
chr11	49769055	49770055
chr13	56530145	56531145
chr13	81176266	81177266
chr14	75042850	75043850
chr15	99287794	99288794
chr16	38712481	38713481
chr17	87131103	87132103
chr2	70877460	70878460
chr2	168075456	168076456
chr4	44180603	44181603
chr5	139936052	139937052
chr8	54692101	54693101
chr1	83723419	83724419
chr1	87870617	87871617
chr2	71576928	71577928
chr4	138407101	138408101
chr5	143176752	143177752
chr9	63278127	63279127
chr1	130255812	130256812
chr10	98974140	98975140
chr11	23155096	23156096
chr11	57992836	57993836
chr14	27927532	27928532
chr16	13754130	13755130
chr3	90216233	90217233
chr6	82756173	82757173
chr6	83217854	83218854
chr8	90642167	90643167
chr9	74918778	74919778
chr9	77757964	77758964
chr12	32634834	32635834
chr7	16683252	16684252
chr5	73770821	73771821
chr1	93263101	93264101
chr1	173040830	173041830
chr13	53306929	53307929
chr2	178928180	178929180
chr8	25605419	25606419
chr1	93800000	93801000
chr11	77161224	77162224
chr11	78156464	78157464
chr1	53353439	53354439
chr1	166965511	166966511
chr1	180117325	180118325
chr12	8954214	8955214
chr12	41705404	41706404
chr4	43432880	43433880
chr7	138170768	138171768
chr12	119058279	119059279
chr4	137772541	137773541
chr8	86937780	86938780
chr14	24348669	24349669
chr14	122264093	122265093
chr2	11241581	11242581
chr4	54910364	54911364
chr1	10029337	10030337
chr1	52874108	52875108
chr11	61743197	61744197
chr12	101122312	101123312
chr19	17911715	17912715
chr2	38285106	38286106
chr3	94216572	94217572
chr7	20506012	20507012
chr8	77617001	77618001
chr9	48644065	48645065
chr17	57386713	57387713
chr8	72654674	72655674
chr1	82185136	82186136
chr1	145850861	145851861
chr10	18265288	18266288
chr14	73924577	73925577
chr16	5306398	5307398
chr16	39052737	39053737
chr2	33413441	33414441
chr4	11485610	11486610
chr5	134539269	134540269
chr7	52070717	52071717
chr10	22298964	22299964
chr11	119387558	119388558
chr17	85794534	85795534
chr18	70727437	70728437
chr4	140587340	140588340
chr7	36054454	36055454
chr7	147326976	147327976
chr9	90101021	90102021
chr18	33953994	33954994
chr2	115406933	115407933
chr3	88638623	88639623
chr6	30353114	30354114
chr11	58143366	58144366
chr11	115397187	115398187
chr7	149280707	149281707
chr11	61788987	61789987
chr11	83662670	83663670
chr13	78340534	78341534
chr14	22501763	22502763
chr16	22302385	22303385
chr16	30308365	30309365
chr16	31591693	31592693
chr19	24726518	24727518
chr5	139960036	139961036
chr6	33879415	33880415
chr7	25101242	25102242
chr8	113493729	113494729
chr9	21608504	21609504
chr11	107050089	107051089
chr8	79422568	79423568
chr9	80039855	80040855
chr9	114690453	114691453
chr14	46497720	46498720
chr2	118798134	118799134
chr8	74743111	74744111
chr8	94321108	94322108
chr1	148125007	148126007
chr6	108732542	108733542
chr17	34442286	34443286
chr1	157328950	157329950
chr11	50729189	50730189
chr13	81001157	81002157
chr18	12598658	12599658
chr19	34240053	34241053
chr2	93174216	93175216
chr3	119017300	119018300
chr4	117601683	117602683
chr5	114443373	114444373
chr6	47780042	47781042
chr7	134403847	134404847
chr9	109734767	109735767
chrX	34706745	34707745
chr3	8666848	8667848
chr4	106233119	106234119
chr9	66623049	66624049
chr1	58480481	58481481
chr11	4494381	4495381
chr13	14073914	14074914
chr3	136367129	136368129
chr3	144043598	144044598
chr4	16090176	16091176
chr5	22892363	22893363
chr5	130220828	130221828
chr7	148856576	148857576
chr8	72825888	72826888
chr8	125383442	125384442
chr12	104770011	104771011
chr13	56298497	56299497
chr2	118801734	118802734
chr4	124527983	124528983
chr7	25917864	25918864
chr1	54614043	54615043
chr11	75104048	75105048
chr15	31114462	31115462
chr2	76512800	76513800
chr4	135761730	135762730
chr7	146870172	146871172
chr7	149135062	149136062
chr8	79621690	79622690
chr11	94867532	94868532
chr5	123844134	123845134
chr15	74393660	74394660
chr7	119849118	119850118
chr1	173956916	173957916
chr12	56937225	56938225
chr14	64153449	64154449
chr16	34573365	34574365
chr17	85025283	85026283
chr4	123341670	123342670
chr4	148088667	148089667
chr6	129373347	129374347
chr1	173152248	173153248
chr12	25183102	25184102
chr14	21000572	21001572
chr4	126802787	126803787
chr5	115956121	115957121
chr11	100675432	100676432
chr15	8518318	8519318
chr17	45733727	45734727
chr2	166906075	166907075
chr4	3346939	3347939
chr5	25265292	25266292
chr8	77395209	77396209
chr3	121995742	121996742
chr4	8726347	8727347
chr4	132979772	132980772
chr6	30459282	30460282
chr8	4676890	4677890
chr2	101312594	101313594
chr1	54813855	54814855
chr11	59623301	59624301
chr12	25901268	25902268
chr12	87743394	87744394
chr15	27853026	27854026
chr16	58408035	58409035
chr16	95880148	95881148
chr17	27021558	27022558
chr2	62427066	62428066
chr2	152051767	152052767
chr5	23355919	23356919
chr6	83164945	83165945
chr6	141320918	141321918
chr7	71457411	71458411
chr8	81469208	81470208
chr10	81703582	81704582
chr14	28148649	28149649
chr3	94260076	94261076
chr6	56664386	56665386
chr7	13465965	13466965
chr11	22907978	22908978
chr11	63026282	63027282
chr12	56936769	56937769
chr14	122277244	122278244
chr3	127624714	127625714
chr3	136332416	136333416
chr4	128274757	128275757
chr5	51944656	51945656
chr5	86620057	86621057
chr9	123295207	123296207
chr11	17179575	17180575
chr18	65460089	65461089
chr4	105001109	105002109
chr7	109843594	109844594
chr8	69383612	69384612
chr10	59255899	59256899
chr11	5344474	5345474
chr12	109948814	109949814
chr13	29045165	29046165
chr13	101545355	101546355
chr15	12687287	12688287
chr16	21245667	21246667
chr17	45873284	45874284
chr2	51399161	51400161
chr2	112294705	112295705
chr2	128954935	128955935
chr4	8616871	8617871
chr5	99587352	99588352
chr6	5247824	5248824
chr4	140256803	140257803
chr4	155265874	155266874
chr7	104548095	104549095
chr10	92622858	92623858
chr2	69964563	69965563
chr10	10028575	10029575
chr10	121192550	121193550
chr18	79196902	79197902
chr3	72869737	72870737
chr13	56256106	56257106
chr16	17743063	17744063
chr4	151235548	151236548
chr1	36691507	36692507
chr10	126306404	126307404
chr17	13368142	13369142
chr17	46247427	46248427
chr3	143673268	143674268
chr6	94776372	94777372
chr10	95990193	95991193
chr17	34781247	34782247
chr17	56904166	56905166
chr2	125450457	125451457
chr2	155673700	155674700
chr3	98070835	98071835
chr9	96569995	96570995
chr2	91489803	91490803
chr8	127536376	127537376
chr11	49638130	49639130
chr11	71879515	71880515
chr15	75898998	75899998
chr15	76648222	76649222
chr7	25814805	25815805
chr7	73983987	73984987
chr7	116361355	116362355
chr7	142927659	142928659
chr8	83454162	83455162
chr1	184436499	184437499
chr17	85189766	85190766
chr19	44014177	44015177
chr5	44362097	44363097
chr3	67859967	67860967
chr1	24299007	24300007
chr10	41606608	41607608
chr11	88325777	88326777
chr11	97643266	97644266
chr11	121037263	121038263
chr12	17228525	17229525
chr17	29459235	29460235
chr17	30140795	30141795
chr2	19578888	19579888
chr2	118751745	118752745
chr3	84671171	84672171
chr4	12016020	12017020
chr5	102498524	102499524
chr5	125342361	125343361
chr6	48721666	48722666
chr8	75877051	75878051
chr9	36984378	36985378
chr3	54538944	54539944
chr8	119445377	119446377
chr10	89092511	89093511
chr4	118677270	118678270
chr5	28827263	28828263
chr11	29593345	29594345
chr11	66725645	66726645
chr17	24832621	24833621
chr19	3942970	3943970
chr19	5278107	5279107
chr2	33397885	33398885
chr2	59449566	59450566
chr4	116882680	116883680
chr4	126912696	126913696
chr5	136592075	136593075
chr7	117202579	117203579
chr7	146100826	146101826
chr1	193813574	193814574
chr18	60621634	60622634
chr19	23116274	23117274
chr19	47089193	47090193
chr2	150834634	150835634
chr4	138255789	138256789
chr5	134026594	134027594
chr7	123674456	123675456
chr15	94419855	94420855
chr5	137428551	137429551
chr1	66746961	66747961
chr1	10029737	10030737
chr11	49465973	49466973
chr16	42276302	42277302
chr3	87642258	87643258
chr7	56376325	56377325
chr8	131208957	131209957
chr10	97506199	97507199
chr11	53283121	53284121
chr11	58143717	58144717
chr11	90547611	90548611
chr12	8319688	8320688
chr13	91061951	91062951
chr15	79527148	79528148
chr16	29896174	29897174
chr3	90275855	90276855
chr3	108313822	108314822
chr6	72210921	72211921
chr6	146450248	146451248
chr8	13889782	13890782
chr1	55460930	55461930
chr1	136140488	136141488
chr10	69332810	69333810
chr10	82161308	82162308
chr11	96095893	96096893
chr13	22142486	22143486
chr14	21027282	21028282
chr16	90727234	90728234
chr19	43659022	43660022
chr2	73116243	73117243
chr3	36080105	36081105
chr3	79099676	79100676
chr4	137133767	137134767
chr5	97221988	97222988
chr6	28211576	28212576
chr7	111613257	111614257
chr8	127689137	127690137
chr9	59570639	59571639
chr9	103526701	103527701
chr19	55652674	55653674
chr7	87485391	87486391
chr1	69878420	69879420
chr10	43763060	43764060
chr13	108250820	108251820
chr16	21332871	21333871
chr16	35874250	35875250
chr2	102971005	102972005
chr2	152224120	152225120
chr3	101015574	101016574
chr4	124479245	124480245
chr8	42011593	42012593
chr8	127201081	127202081
chr9	123275494	123276494
chr11	114650039	114651039
chr13	98717275	98718275
chr1	10237658	10238658
chr1	154987727	154988727
chr1	166976384	166977384
chr10	43260292	43261292
chr11	90251743	90252743
chr11	96690873	96691873
chr12	17354727	17355727
chr14	32198869	32199869
chr16	10374440	10375440
chr18	73782419	73783419
chr19	45820552	45821552
chr2	138081819	138082819
chr3	104764243	104765243
chr6	5205796	5206796
chr6	135106414	135107414
chr7	51816063	51817063
chr7	53894709	53895709
chr8	97844331	97845331
chr8	112603111	112604111
chr9	45397628	45398628
chr9	94308655	94309655
chr9	100934511	100935511
chr9	120841955	120842955
chr13	73673643	73674643
chr1	99991657	99992657
chr10	30522385	30523385
chr12	84860984	84861984
chr13	81020683	81021683
chr14	122130694	122131694
chr2	70578520	70579520
chr2	139891930	139892930
chr3	81832832	81833832
chr4	43873675	43874675
chr5	140797071	140798071
chr8	127969849	127970849
chrX	16195148	16196148
chr13	37543943	37544943
chr17	33954046	33955046
chr4	135125674	135126674
chr5	124022504	124023504
chr7	36370782	36371782
chr8	64069556	64070556
chr18	53115815	53116815
chr1	74863122	74864122
chr1	155032771	155033771
chr11	101949356	101950356
chr2	133206484	133207484
chr4	34905284	34906284
chr5	112753200	112754200
chr8	72426711	72427711
chr9	100483073	100484073
chrY	1481107	1482107
chr3	87709657	87710657
chr9	122329920	122330920
chr1	10079304	10080304
chr1	36501681	36502681
chr11	79240858	79241858
[truncated: 32,314 more rows]

## Sheet: Shared DHS-HNF4A sites
Supplemental Table S8: Shared DHS-HNF4A sites (related to Supplemental Fig. S6)
Shared DHS-HNF4A(GF) regions
chr1	94076993	94077993
chr15	75533449	75534449
chr11	110287523	110288523
chr12	80291486	80292486
chr6	146582579	146583579
chr10	124597885	124598885
chr11	87975285	87976285
chr18	34008698	34009698
chr5	40035448	40036448
chr4	62278478	62279478
chr8	75843098	75844098
chr19	32647433	32648433
chr1	186706466	186707466
chr18	66634696	66635696
chr17	35653485	35654485
chr7	123748911	123749911
chr7	20556612	20557612
chr4	149167745	149168745
chr1	174306047	174307047
chr9	102673504	102674504
chr3	145626049	145627049
chr2	71557301	71558301
chr2	155663384	155664384
chr18	10913181	10914181
chr7	87484637	87485637
chr16	90412394	90413394
chr19	56762254	56763254
chr3	41398154	41399154
chr6	135222778	135223778
chr6	11857314	11858314
chr1	137209951	137210951
chr19	31965392	31966392
chr12	5290198	5291198
chr10	94196614	94197614
chr10	24921554	24922554
chr18	78323284	78324284
chr11	88816281	88817281
chr10	17190363	17191363
chr10	96184828	96185828
chr19	3955622	3956622
chr5	87960964	87961964
chr9	115274188	115275188
chr15	98447117	98448117
chr13	47287233	47288233
chr2	156912174	156913174
chr5	75219459	75220459
chr5	44336280	44337280
chr19	56430693	56431693
chr5	92890073	92891073
chr12	12794782	12795782
chr15	41619706	41620706
chr10	96037144	96038144
chr13	114540696	114541696
chr14	20527174	20528174
chr8	118494959	118495959
chr11	87950967	87951967
chr2	73776672	73777672
chr8	120219191	120220191
chr5	28362189	28363189
chr17	33052562	33053562
chr1	78396053	78397053
chr1	128644180	128645180
chr4	133313097	133314097
chr4	10068384	10069384
chr18	46484376	46485376
chr11	62574361	62575361
chr5	46969576	46970576
chr6	134775795	134776795
chr4	44085181	44086181
chr17	14304287	14305287
chr9	21069125	21070125
chr3	84090889	84091889
chr14	46879714	46880714
chr10	111032326	111033326
chr11	6174442	6175442
chr9	58653444	58654444
chr3	109110015	109111015
chr8	36882760	36883760
chr5	136992152	136993152
chr6	59375890	59376890
chr9	25268143	25269143
chr7	147222117	147223117
chr1	157099274	157100274
chr18	38937427	38938427
chr5	108741260	108742260
chr3	53667543	53668543
chr1	59495674	59496674
chr10	74852611	74853611
chr18	57722264	57723264
chr18	42739980	42740980
chr10	58753970	58754970
chr19	6363997	6364997
chr13	113098564	113099564
chr1	59269501	59270501
chr7	4453330	4454330
chr1	88421428	88422428
chr5	147499154	147500154
chr10	90522213	90523213
chr10	62130519	62131519
chr1	141318293	141319293
chr8	92902666	92903666
chr4	80673163	80674163
chr7	147949029	147950029
chr10	43475776	43476776
chr15	102008447	102009447
chr4	94734990	94735990
chr4	148376357	148377357
chr1	59268950	59269950
chr7	141918342	141919342
chr15	99530310	99531310
chr10	98113946	98114946
chr5	91629187	91630187
chr4	115403890	115404890
chr13	64262623	64263623
chr2	160447321	160448321
chr9	110183318	110184318
chr16	36040748	36041748
chr9	123169466	123170466
chr3	51004536	51005536
chr6	6198194	6199194
chr7	86293471	86294471
chr5	139624924	139625924
chr5	77270573	77271573
chr8	47084819	47085819
chr3	58484552	58485552
chr4	129923065	129924065
chr14	103468914	103469914
chr5	67738055	67739055
chr5	138377469	138378469
chr1	7387285	7388285
chr9	95975593	95976593
chr1	67125374	67126374
chr6	29463011	29464011
chr18	61941534	61942534
chr7	25161759	25162759
chr13	55291282	55292282
chr2	127095344	127096344
chr15	101352843	101353843
chr4	40649429	40650429
chr7	151305079	151306079
chr2	93578931	93579931
chr15	88919000	88920000
chr5	150125158	150126158
chr3	84089164	84090164
chr7	85972254	85973254
chr9	66616761	66617761
chr12	78195686	78196686
chr7	53303281	53304281
chr17	13658382	13659382
chr19	37624801	37625801
chr5	28796009	28797009
chr4	94392183	94393183
chr6	31348290	31349290
chr17	4974464	4975464
chr18	73649197	73650197
chr4	135154632	135155632
chr4	141448773	141449773
chr17	87922702	87923702
chr2	34494480	34495480
chr1	21156047	21157047
chr14	100358685	100359685
chr8	37554056	37555056
chr19	4755961	4756961
chr1	136453121	136454121
chr6	135493635	135494635
chr3	41394616	41395616
chr5	104692120	104693120
chr6	140229237	140230237
chr15	96664592	96665592
chr5	35917249	35918249
chr1	174562728	174563728
chr3	52267416	52268416
chr3	130614756	130615756
chr12	4849657	4850657
chr11	102889150	102890150
chr19	32804496	32805496
chr17	88725415	88726415
chr4	58726769	58727769
chr1	177561768	177562768
chr2	13192569	13193569
chr1	52806522	52807522
chr14	19065982	19066982
chr11	58166277	58167277
chr4	128295217	128296217
chr5	111209231	111210231
chr9	102681556	102682556
chr2	167363083	167364083
chr10	84219922	84220922
chr10	24358197	24359197
chr4	115319908	115320908
chr4	150090125	150091125
chr14	70025628	70026628
chr2	53049844	53050844
chr2	104332771	104333771
chr10	7815552	7816552
chr16	33195732	33196732
chr1	173340925	173341925
chr9	122940691	122941691
chr10	24359125	24360125
chr3	67233509	67234509
chr6	122258258	122259258
chr16	24464299	24465299
chr5	53422273	53423273
chr13	24853368	24854368
chr3	83981498	83982498
chr4	142464695	142465695
chr12	88430364	88431364
chr6	84183488	84184488
chr3	121577783	121578783
chr8	42871025	42872025
chr1	124253285	124254285
chr9	72255789	72256789
chr4	102986005	102987005
chr3	87826491	87827491
chr1	194548039	194549039
chr6	108659613	108660613
chr5	30446311	30447311
chr8	11700001	11701001
chr4	83268638	83269638
chr4	126288661	126289661
chr4	107743512	107744512
chr1	121289426	121290426
chr10	80554899	80555899
chr3	94946205	94947205
chr1	56596537	56597537
chr12	4299011	4300011
chr11	83633009	83634009
chr5	96831259	96832259
chr19	52449361	52450361
chr1	139109915	139110915
chr11	67857436	67858436
chr1	191865860	191866860
chr17	87556726	87557726
chr16	92697130	92698130
chr6	147708342	147709342
chr1	157624422	157625422
chr11	105927625	105928625
chr5	98448084	98449084
chr8	41888720	41889720
chr13	30077610	30078610
chr5	99783210	99784210
chr15	89185545	89186545
chr4	133898550	133899550
chr1	162722589	162723589
chr18	36098915	36099915
chr3	84975171	84976171
chr8	3392457	3393457
chr1	173407842	173408842
chr10	61108989	61109989
chr11	104411314	104412314
chr8	129654320	129655320
chr15	55070191	55071191
chr7	146433844	146434844
chr1	79757826	79758826
chr3	128869345	128870345
chr1	155034884	155035884
chr7	121285744	121286744
chr11	35547914	35548914
chr15	98307930	98308930
chr17	84652475	84653475
chr19	38739616	38740616
chr3	108854193	108855193
chr2	34261841	34262841
chr16	33561316	33562316
chr4	93001643	93002643
chr8	71587106	71588106
chr18	64777883	64778883
chr4	53321433	53322433
chr5	37132989	37133989
chr7	135175613	135176613
chr4	99680656	99681656
chr12	118771831	118772831
chr19	39134931	39135931
chr4	55017581	55018581
chr4	121870449	121871449
chr3	49828192	49829192
chr15	75534121	75535121
chr19	55667433	55668433
chr12	17544549	17545549
chr13	44452036	44453036
chr12	32082289	32083289
chr15	85035906	85036906
chr3	123140189	123141189
chr4	124428257	124429257
chr16	24313301	24314301
chr13	81803052	81804052
chr15	12297160	12298160
chr5	137437446	137438446
chr18	36101510	36102510
chr19	16404394	16405394
chr4	128779068	128780068
chr9	44059128	44060128
chr8	85855994	85856994
chr4	89141207	89142207
chr1	13579542	13580542
chr13	113597873	113598873
chr12	80292356	80293356
chr2	27370107	27371107
chr15	100836808	100837808
chr6	30804920	30805920
chr8	98411845	98412845
chr4	89142134	89143134
chr13	96622993	96623993
chr1	39648604	39649604
chr4	111564478	111565478
chr10	26491721	26492721
chr19	4838901	4839901
chr18	66428709	66429709
chr6	22050689	22051689
chr10	24473005	24474005
chr19	18705888	18706888
chr9	86342913	86343913
chr1	59754386	59755386
chr17	13733391	13734391
chr12	55357461	55358461
chr8	47845772	47846772
chr2	131997359	131998359
chr4	139090673	139091673
chr16	18083113	18084113
chr10	93497604	93498604
chr14	75071915	75072915
chr4	149655143	149656143
chr5	34011879	34012879
chr1	180204988	180205988
chr2	29201800	29202800
chr9	108362336	108363336
chr7	4989265	4990265
chr3	82707462	82708462
chr3	127161607	127162607
chr10	80118874	80119874
chr9	116190360	116191360
chr15	61946105	61947105
chr3	41397696	41398696
chr3	61139803	61140803
chr1	90116635	90117635
chr11	83663092	83664092
chr5	23670345	23671345
chr13	118390687	118391687
chr16	32484051	32485051
chr3	40905635	40906635
chr10	57717686	57718686
chr19	32922256	32923256
chr13	39021400	39022400
chr1	174342022	174343022
chr14	20569969	20570969
chr17	22451405	22452405
chr2	172807916	172808916
chr9	104241530	104242530
chr6	6947150	6948150
chr7	52147584	52148584
chr7	118265881	118266881
chr15	37362146	37363146
chr11	62569965	62570965
chr14	18491177	18492177
chr1	184494566	184495566
chr14	55082448	55083448
chr8	87959318	87960318
chr17	30635034	30636034
chr2	151934812	151935812
chr16	33196356	33197356
chr8	112089186	112090186
chr18	42738995	42739995
chr19	17602925	17603925
chr11	43596933	43597933
chr5	75356052	75357052
chr4	155243128	155244128
chr7	28258166	28259166
chr6	119797771	119798771
chr13	69782956	69783956
chr4	33092754	33093754
chr14	65995075	65996075
chr5	129602088	129603088
chr9	31682846	31683846
chr5	8667598	8668598
chr11	83663587	83664587
chr11	96777382	96778382
chr19	29585994	29586994
chr19	38797170	38798170
chr19	46072324	46073324
chr4	129419159	129420159
chr8	93657592	93658592
chr9	70803061	70804061
chr2	157070412	157071412
chr19	18804489	18805489
chr11	117180899	117181899
chr16	29813790	29814790
chr5	99262477	99263477
chr18	47603209	47604209
chr11	20530912	20531912
chr17	26249732	26250732
chr5	141438659	141439659
chr16	24469138	24470138
chr1	40737748	40738748
chr1	152975767	152976767
chr1	195378183	195379183
chr18	73401827	73402827
chr13	65379649	65380649
chr18	74683956	74684956
chr12	4823722	4824722
chr18	34490319	34491319
chr4	138252372	138253372
chr12	118697703	118698703
chr4	55617471	55618471
chr5	145015019	145016019
chr1	129293765	129294765
chr12	70397214	70398214
chr2	155417999	155418999
chr5	142876940	142877940
chr17	46909257	46910257
chr8	37312063	37313063
chr13	94562913	94563913
chr8	23147195	23148195
chr5	51817283	51818283
chr12	12806636	12807636
chr12	78278484	78279484
chr13	112308257	112309257
chr7	114738100	114739100
chr8	46495976	46496976
chr9	99138266	99139266
chr10	44819945	44820945
chr15	68090041	68091041
chr16	88667150	88668150
chr18	47529591	47530591
chr2	71556869	71557869
chr9	62188481	62189481
chr17	35530449	35531449
chr11	103624537	103625537
chr17	79280811	79281811
chr11	58164393	58165393
chr2	113216851	113217851
chr3	87420823	87421823
chr7	87171457	87172457
chr2	162796998	162797998
chr3	21884728	21885728
chr11	61863805	61864805
chr13	24852846	24853846
chr19	10005329	10006329
chr9	110905606	110906606
chr11	40071080	40072080
chr14	47915586	47916586
chr16	10656754	10657754
chr3	63659246	63660246
chr9	31349094	31350094
chr5	91633352	91634352
chr1	88165216	88166216
chr11	69394548	69395548
chr13	99789680	99790680
chr7	86878932	86879932
chr10	90524827	90525827
chr10	107377890	107378890
chr15	97923325	97924325
chr2	153168066	153169066
chr3	28487906	28488906
chr4	35898675	35899675
chr1	3504551	3505551
chr10	77829406	77830406
chr11	4773442	4774442
chr12	70683558	70684558
chr1	74432951	74433951
chr13	41111140	41112140
chr6	135117623	135118623
chr8	112302033	112303033
chr3	85774425	85775425
chr14	56097610	56098610
chr2	49205053	49206053
chr6	33009849	33010849
chr4	137417612	137418612
chr15	61281468	61282468
chr4	86477528	86478528
chr5	140267472	140268472
chr6	57500935	57501935
chr7	97590806	97591806
chr2	31396811	31397811
chr1	59268220	59269220
chr1	195369196	195370196
chr16	30423839	30424839
chr14	55495202	55496202
chr16	48412062	48413062
chr15	66848882	66849882
chr16	31508776	31509776
chr9	44225596	44226596
chr4	122938696	122939696
chr12	112591315	112592315
chr2	59720072	59721072
chr2	92215039	92216039
chr2	119307739	119308739
chr7	82537302	82538302
chr10	28107306	28108306
chr10	93610119	93611119
chr3	51902876	51903876
chr4	83830416	83831416
chr14	25028878	25029878
chr3	49829713	49830713
chr1	59268627	59269627
chr11	68379647	68380647
chr7	74313491	74314491
chr9	105396952	105397952
chr2	102026104	102027104
chr2	25401935	25402935
chr4	98584543	98585543
chr6	54314538	54315538
chr8	74738637	74739637
chr13	99469633	99470633
chr16	30959441	30960441
chr1	106937931	106938931
chr3	21885181	21886181
chr16	18108081	18109081
chr3	68829730	68830730
chr6	24614639	24615639
chr4	103891108	103892108
chr8	107508553	107509553
chr5	103690125	103691125
chr15	77327604	77328604
chr9	118714540	118715540
chr11	62271416	62272416
chr2	167830741	167831741
chr4	118188943	118189943
chr9	77983679	77984679
chr10	75146466	75147466
chr4	122612367	122613367
chr9	105041177	105042177
chr1	43479876	43480876
chr16	76242811	76243811
chr5	35291606	35292606
chr6	128500982	128501982
chr9	62980275	62981275
chr5	147887646	147888646
chr11	22720911	22721911
chr16	15863005	15864005
chr18	61453178	61454178
chr2	151367742	151368742
chr4	134090786	134091786
chr2	93586450	93587450
chr6	58974105	58975105
chr15	3945407	3946407
chr6	114963276	114964276
chr3	115590364	115591364
chr8	113823734	113824734
chr16	90412811	90413811
chr19	39187834	39188834
chr3	94945846	94946846
chr8	122929542	122930542
chr13	95055239	95056239
chr14	55083119	55084119
chr18	66161861	66162861
chr10	21546321	21547321
chr10	92987737	92988737
chr4	106964573	106965573
chr5	137437749	137438749
chr7	97248948	97249948
chr8	42900366	42901366
chr7	111654932	111655932
chr13	104710738	104711738
chr4	89026668	89027668
chr10	8651030	8652030
chr15	82168728	82169728
chr18	79177156	79178156
chr4	45674146	45675146
chr6	22372783	22373783
chr14	31814326	31815326
chr15	34167367	34168367
chr3	41326328	41327328
chr10	120496061	120497061
chr6	125554139	125555139
chr7	53491353	53492353
chr8	129652389	129653389
chr9	72806097	72807097
chr1	95407699	95408699
chr10	61573298	61574298
chr14	75049513	75050513
chr2	14165490	14166490
chr2	152185014	152186014
chr8	119822811	119823811
chr2	109418772	109419772
chr4	133312278	133313278
chr5	29144832	29145832
chr10	80557755	80558755
chr6	146448410	146449410
chr6	13821086	13822086
chr12	51277231	51278231
chr14	70455365	70456365
chr3	37646606	37647606
chr4	53216131	53217131
chr5	53410694	53411694
chr10	82494899	82495899
chr2	180190051	180191051
chr10	53348771	53349771
chr2	157761241	157762241
chr8	85740175	85741175
chr11	98724415	98725415
chr3	116210590	116211590
chr5	44504077	44505077
chr6	140295110	140296110
chr14	47441398	47442398
chr7	130251575	130252575
chr17	83621805	83622805
chr17	89026186	89027186
chr4	135155396	135156396
chr5	124170542	124171542
chr7	52238161	52239161
chr10	51951640	51952640
chr13	6047938	6048938
chr15	78608628	78609628
chr16	37654077	37655077
chr1	95238916	95239916
chr17	50827213	50828213
chr10	24110618	24111618
chr10	74874716	74875716
chr11	98331637	98332637
chr17	35561201	35562201
chr3	84413784	84414784
chr6	3345647	3346647
chr12	32122238	32123238
chr7	104914964	104915964
chr7	105268496	105269496
chr1	24011970	24012970
chr1	77050102	77051102
chr11	106650070	106651070
chr13	22127090	22128090
chr6	40567622	40568622
chr7	85991573	85992573
chr6	122760967	122761967
chr6	127555293	127556293
chr1	162009203	162010203
chr10	23531409	23532409
chr4	47365635	47366635
chr9	62875613	62876613
chr11	89775551	89776551
chr11	116975921	116976921
chr1	71149173	71150173
chr17	33083910	33084910
chr11	94253838	94254838
chr11	94286239	94287239
chr13	64349039	64350039
chr9	66966754	66967754
chr9	105689841	105690841
chr11	100711343	100712343
chr11	75344605	75345605
chr18	34713897	34714897
chr13	49739016	49740016
chr15	96632973	96633973
chr2	76176568	76177568
chr6	31165998	31166998
chr9	108249750	108250750
chr12	112246483	112247483
chr12	88487544	88488544
chr12	29489650	29490650
chr14	33326490	33327490
chr19	57153260	57154260
chr5	138010530	138011530
chr14	61315833	61316833
chr8	93672887	93673887
chr12	86125156	86126156
chr4	154494367	154495367
chr1	40842311	40843311
chr10	17019179	17020179
chr10	44720379	44721379
chr13	36394366	36395366
chr2	28980124	28981124
chr3	129958792	129959792
chr5	65141419	65142419
chr5	115040880	115041880
chr6	70747564	70748564
chr9	64869066	64870066
chr9	119841180	119842180
chr8	74684489	74685489
chr11	100948102	100949102
chr10	127373709	127374709
chr6	17413967	17414967
chr11	20393648	20394648
chr11	69671821	69672821
chr12	88488052	88489052
chr6	99143365	99144365
chr1	186701007	186702007
chr2	29193613	29194613
chr7	52578175	52579175
chr7	54050967	54051967
chr12	104663661	104664661
chr14	121451888	121452888
chr17	7071779	7072779
chr6	99472965	99473965
chr7	134489196	134490196
chr9	14079099	14080099
chr2	126400855	126401855
chr1	157048093	157049093
chr14	67571593	67572593
chr15	66808613	66809613
chr18	24287381	24288381
chr2	10193926	10194926
chr7	82543853	82544853
chr13	98110159	98111159
chr4	122959438	122960438
chr6	115488664	115489664
chr7	106858644	106859644
chr17	87900103	87901103
chr19	42164415	42165415
chr7	117333107	117334107
chr13	6035018	6036018
chr13	19722560	19723560
chr2	45394713	45395713
chr4	65267820	65268820
chr7	135174782	135175782
chr1	172412323	172413323
chr10	74499316	74500316
chr2	174485530	174486530
chr4	131630814	131631814
chr8	13199009	13200009
chr1	95057052	95058052
chr10	41835324	41836324
chr11	86025043	86026043
chr12	114114302	114115302
chr13	41495069	41496069
chr16	22439324	22440324
chr19	57388920	57389920
chr9	110902045	110903045
chr10	39871372	39872372
chr11	50008021	50009021
chr16	94758508	94759508
chr7	74517567	74518567
chr8	109673953	109674953
chr9	80024191	80025191
chr11	20243697	20244697
chr2	27526748	27527748
chr4	126145451	126146451
chr7	122451572	122452572
chr9	72296874	72297874
chrX	109999877	110000877
chr17	49044580	49045580
chr4	3604745	3605745
chr15	100244142	100245142
chr8	11911775	11912775
chr11	70375869	70376869
chr19	53379816	53380816
chr4	115320238	115321238
chr2	51537386	51538386
chr5	92566331	92567331
chr6	140944066	140945066
chr7	149864241	149865241
chr9	30628056	30629056
chr1	74282477	74283477
chr1	83054685	83055685
chr11	31790186	31791186
chr12	100335693	100336693
chr16	8512993	8513993
chr17	66177969	66178969
chr2	18688496	18689496
chr5	28216180	28217180
chr8	83397284	83398284
chr1	136003020	136004020
chr10	77576914	77577914
chr13	103415340	103416340
chr2	72420384	72421384
chr10	95060488	95061488
chr11	116997886	116998886
chr13	63240523	63241523
chr4	43668913	43669913
chr19	31942685	31943685
chr6	89362214	89363214
chr7	107947075	107948075
chr7	148777679	148778679
chr1	121929335	121930335
chr12	80459540	80460540
chr16	38705609	38706609
chr19	11096561	11097561
chr4	63261508	63262508
chr4	148449633	148450633
chr5	91591562	91592562
chr13	75480266	75481266
chr2	11250841	11251841
chr2	110292524	110293524
chr3	142363497	142364497
chr14	69894022	69895022
chr18	11354932	11355932
chr2	126787099	126788099
chr7	75893769	75894769
chr14	68445882	68446882
chr15	27559996	27560996
chr7	4989594	4990594
chr7	75916048	75917048
chr7	117791936	117792936
chr8	88015982	88016982
chr1	34915286	34916286
chr13	90935139	90936139
chr2	173359748	173360748
chr4	58095171	58096171
chr6	141097242	141098242
chr7	104595458	104596458
chr10	42720970	42721970
chr6	145121943	145122943
chr10	70838483	70839483
chr15	81415087	81416087
chr2	155833234	155834234
chr7	25054921	25055921
chr8	24886509	24887509
chr11	69256594	69257594
chr11	99760027	99761027
chr14	54777593	54778593
chr15	5994183	5995183
chr15	89145338	89146338
chr3	97622019	97623019
chr6	49186021	49187021
chr8	75071729	75072729
chr10	61691832	61692832
chr2	20261287	20262287
chr4	11412630	11413630
chr8	81603650	81604650
chr10	41238738	41239738
chr11	53953110	53954110
chr3	100899611	100900611
chr3	108714198	108715198
chr4	122816735	122817735
chr5	137462265	137463265
chr9	114555608	114556608
chr7	121951535	121952535
chr12	100656631	100657631
chr2	154215593	154216593
chr2	110216556	110217556
chr6	84220237	84221237
chr13	5912107	5913107
chr4	120188775	120189775
chr7	146433522	146434522
chr1	37060517	37061517
chr10	12912100	12913100
chr10	19653446	19654446
chr10	74522811	74523811
chr12	111458415	111459415
chr14	70368893	70369893
chr2	181316214	181317214
chr4	133155302	133156302
chr7	109111000	109112000
chr7	118145785	118146785
chr7	125402971	125403971
chr8	122978001	122979001
chr5	115981666	115982666
chr10	40403001	40404001
chr10	95342622	95343622
chr18	61395503	61396503
chr3	36404926	36405926
chr6	6050609	6051609
chr10	43696827	43697827
chr16	5368700	5369700
chr16	35490459	35491459
chr6	48844663	48845663
chr9	30704009	30705009
chr19	29399323	29400323
chr7	77445068	77446068
chr7	137739287	137740287
chr11	62573946	62574946
chr13	97967816	97968816
chr17	17761545	17762545
chr2	154429038	154430038
chr5	140170663	140171663
chr5	147515000	147516000
chr6	61173281	61174281
chr7	26682042	26683042
chr7	35892302	35893302
chr9	51785375	51786375
chr11	117994661	117995661
chr11	120214645	120215645
chr13	14180542	14181542
chr13	40942951	40943951
chr16	46007825	46008825
chr13	95054919	95055919
chr16	20875565	20876565
chr4	134828378	134829378
chr12	80312179	80313179
chr13	48948591	48949591
chr14	122459552	122460552
chr2	118982280	118983280
chr3	94938614	94939614
chr1	138776529	138777529
chr1	139065320	139066320
chr15	38304181	38305181
chr19	56431177	56432177
chr2	117867820	117868820
chr3	52489005	52490005
chr9	41592969	41593969
chr11	84748149	84749149
chr11	115352688	115353688
chr15	74722183	74723183
chr11	22412155	22413155
chr12	31627808	31628808
chr13	48807769	48808769
chr16	10313527	10314527
chr16	10319673	10320673
chr4	89088040	89089040
chr5	114792694	114793694
chr5	120135900	120136900
chr7	146598941	146599941
chr15	76446456	76447456
chr4	133368758	133369758
chr8	119517000	119518000
chr1	58670333	58671333
chr13	44281507	44282507
chr16	21825492	21826492
chr3	106284885	106285885
chr5	16925426	16926426
chr5	138525832	138526832
chr9	102557448	102558448
chr11	20178413	20179413
chr13	30128095	30129095
chr19	35224960	35225960
chr2	170069648	170070648
chr9	46161704	46162704
chr16	33055752	33056752
chr5	65360858	65361858
chr6	67119939	67120939
chr9	123587592	123588592
chr11	31738096	31739096
chr16	76865732	76866732
chr19	47506566	47507566
chr6	47902849	47903849
chr9	44606869	44607869
chr4	5573058	5574058
chr11	62640304	62641304
chr11	120379557	120380557
chr13	75480585	75481585
chr8	88319995	88320995
chr9	21639403	21640403
chr9	37733637	37734637
chr4	116667433	116668433
chr7	88357283	88358283
chr1	37723133	37724133
chr19	23207269	23208269
chr3	85945774	85946774
chr3	157245746	157246746
chr6	85770489	85771489
chr10	80684088	80685088
chr11	115921603	115922603
chr16	17891346	17892346
chr17	35240007	35241007
chr2	29049733	29050733
chr7	118265260	118266260
chr8	95856357	95857357
chr1	24684962	24685962
chr1	120491643	120492643
chr12	101660303	101661303
chr15	59654142	59655142
chr16	24447260	24448260
chr17	24174112	24175112
chr18	11204766	11205766
chr18	63130521	63131521
chr3	51521061	51522061
chr4	120497366	120498366
chr6	29298096	29299096
chr7	128491697	128492697
chr10	79727195	79728195
chr18	36903750	36904750
chr9	21349827	21350827
chr9	59450258	59451258
chr11	118947190	118948190
chr13	36052706	36053706
chr11	77708981	77709981
chr13	112684647	112685647
chr3	145674450	145675450
chr4	138327573	138328573
chr7	105265824	105266824
chr3	63452011	63453011
chr4	105036776	105037776
chr13	10448487	10449487
chr17	43587904	43588904
chr2	93689507	93690507
chr2	102913293	102914293
chr2	129023808	129024808
chr3	118297474	118298474
chr13	94008787	94009787
chr2	164551438	164552438
chr8	129469357	129470357
chr3	144745725	144746725
chr11	90527374	90528374
chr3	52273501	52274501
chr1	71148556	71149556
chr10	59543753	59544753
chr11	76758656	76759656
chr11	103082429	103083429
chr11	117093966	117094966
chr13	99794991	99795991
chr16	29987748	29988748
chr17	35841542	35842542
chr18	24811795	24812795
chr4	40215152	40216152
chr4	129219545	129220545
chr5	39236400	39237400
chr9	61384746	61385746
chr7	116743883	116744883
chr1	35987605	35988605
chr10	104993916	104994916
chr13	98746379	98747379
chr18	81833936	81834936
chr5	34872959	34873959
chr5	44300988	44301988
chr7	96571387	96572387
chr13	49516003	49517003
chr19	57388451	57389451
chr3	101609792	101610792
chr3	144332801	144333801
chr7	36048487	36049487
chr8	95895222	95896222
chr19	61216145	61217145
chr6	94967630	94968630
chr10	39679964	39680964
chr17	46133652	46134652
chr4	63286345	63287345
chr6	115427860	115428860
chr7	20452986	20453986
chr7	146528373	146529373
chr7	150978216	150979216
chr9	53916307	53917307
chr2	91203135	91204135
chr13	41700579	41701579
chr17	21982278	21983278
chr19	43538086	43539086
chr3	81736087	81737087
chr5	98805104	98806104
chr5	148722441	148723441
chr7	135493009	135494009
chr3	82750304	82751304
chr11	95926211	95927211
chr4	155134774	155135774
chr5	139885162	139886162
chr8	118231434	118232434
chr17	49561900	49562900
chr4	119094923	119095923
chr9	64585073	64586073
chr17	87736746	87737746
chr19	17390813	17391813
chr2	76448389	76449389
chr4	128949266	128950266
chr6	31509945	31510945
chr7	127778655	127779655
chr12	3919113	3920113
chr6	66484881	66485881
chr1	89806721	89807721
chr5	130732319	130733319
chr9	20325637	20326637
chr17	59152307	59153307
chr6	115720614	115721614
chr1	132422231	132423231
chr12	88066834	88067834
chr16	18678105	18679105
chr2	9800819	9801819
chr3	5575877	5576877
chr8	4238622	4239622
chr8	35868079	35869079
chr9	70987630	70988630
chr4	135069478	135070478
chr6	86633926	86634926
chr9	41962391	41963391
chr18	78032765	78033765
chr7	26213013	26214013
chr7	147301898	147302898
chr2	118082047	118083047
chr6	125263429	125264429
chr1	133019815	133020815
chr4	55649482	55650482
chr6	5360647	5361647
chr7	132671158	132672158
chr1	180267479	180268479
chr10	13272440	13273440
chr13	106102517	106103517
chr16	4439419	4440419
chr17	43122821	43123821
chr19	23107555	23108555
chr2	142728351	142729351
chr4	53323825	53324825
chr4	88773704	88774704
chr4	129012695	129013695
chr5	125955745	125956745
chr6	50089222	50090222
chr9	48531437	48532437
chr9	111113874	111114874
chr10	23516311	23517311
chr1	37946697	37947697
chr13	44036841	44037841
chr14	67807186	67808186
chr14	67807482	67808482
chr2	30574227	30575227
chr11	86940082	86941082
chr14	70015191	70016191
chr2	28368173	28369173
chr3	89215403	89216403
chr6	31028126	31029126
chr7	29221019	29222019
chr7	31694488	31695488
chr1	10222774	10223774
chr7	53179136	53180136
chr13	101168625	101169625
chr13	112608464	112609464
chr16	91441726	91442726
chr17	56017874	56018874
chr19	6476682	6477682
chr19	18964506	18965506
chr19	21126972	21127972
chr19	44083887	44084887
chr4	40704353	40705353
chr6	84539948	84540948
chr8	36889265	36890265
chr1	135161648	135162648
chr10	76991069	76992069
chr15	36507917	36508917
chr15	77801079	77802079
chr16	24151146	24152146
chr2	12845132	12846132
chr5	40049059	40050059
chr1	66908870	66909870
chr10	74668584	74669584
chr12	21321697	21322697
chr16	30388449	30389449
chr18	11600530	11601530
chr4	132677897	132678897
chr13	109326284	109327284
chr12	55263433	55264433
chr18	58819773	58820773
chr19	3984845	3985845
chr4	55689141	55690141
chr4	141726978	141727978
chr6	47278895	47279895
chr9	61431168	61432168
chr9	69884126	69885126
chr1	138461317	138462317
chr10	115216935	115217935
chr11	78141500	78142500
chr12	83198328	83199328
chr14	32742163	32743163
chr15	3534061	3535061
chr16	32810108	32811108
chr19	17502434	17503434
chr3	69003825	69004825
chr4	132287957	132288957
chr5	40008307	40009307
chr7	20158238	20159238
chr9	78023245	78024245
chr9	85320143	85321143
chr19	30022354	30023354
chr5	115140554	115141554
chr8	47488925	47489925
chr10	18321495	18322495
chr12	36913411	36914411
chr3	41424618	41425618
chr4	124706716	124707716
chr5	136989634	136990634
chr6	90343673	90344673
chr8	93904773	93905773
chr13	56779113	56780113
chr16	44138628	44139628
chr2	31575168	31576168
chr3	51512627	51513627
chr9	108593924	108594924
chr1	128616132	128617132
chr12	101763842	101764842
chr15	35195508	35196508
chr15	58611200	58612200
chr16	33184630	33185630
chr19	16404732	16405732
chr19	32463128	32464128
chr2	115737299	115738299
chr3	133218089	133219089
chr4	74923665	74924665
chr4	149676579	149677579
chr5	135565228	135566228
chr8	108089527	108090527
chr1	164500239	164501239
chr10	6645411	6646411
chr11	94593754	94594754
chr14	21167031	21168031
chr15	74822821	74823821
chr18	38843791	38844791
chr18	39712109	39713109
chr5	130354535	130355535
chr17	21625368	21626368
chr4	155427916	155428916
chr7	20461894	20462894
chr9	100885006	100886006
chr16	76202108	76203108
chr3	105697942	105698942
chr7	122017775	122018775
chr11	104107385	104108385
chr12	104671887	104672887
chr19	6629594	6630594
chr4	141626495	141627495
chr5	105889789	105890789
chr10	22450851	22451851
chr6	140496240	140497240
chr9	42957944	42958944
chr9	96378659	96379659
chr9	116084584	116085584
chr14	12939687	12940687
chr19	9998830	9999830
chr2	148506331	148507331
chr2	152978650	152979650
chr2	167523098	167524098
chr3	135085568	135086568
chr9	121780949	121781949
chr1	186735433	186736433
chr11	102504895	102505895
chr14	70495830	70496830
chr16	44242416	44243416
chr19	42305135	42306135
chr5	96373840	96374840
chr5	115037608	115038608
chr8	3514845	3515845
chr10	18182672	18183672
chr11	87822747	87823747
chr11	101081857	101082857
chr11	116810731	116811731
chr13	45097020	45098020
chr14	59644197	59645197
chr14	76883263	76884263
chr16	15886815	15887815
chr7	108469053	108470053
chr8	14965193	14966193
chr9	114597310	114598310
chr6	91745802	91746802
chr10	5913569	5914569
chr11	113154227	113155227
chr13	99884184	99885184
chr14	47735415	47736415
chr17	13734764	13735764
chr17	15700762	15701762
chr19	42154131	42155131
chr5	93769020	93770020
chr5	118781739	118782739
chr7	39012551	39013551
chr3	21873532	21874532
chr4	149594387	149595387
chr5	139775983	139776983
chr7	109081987	109082987
chr16	75766712	75767712
chr18	5819465	5820465
chr4	63371514	63372514
chr7	114737618	114738618
chr8	95537990	95538990
chr13	3861274	3862274
chr2	11473636	11474636
chr4	99601512	99602512
chr9	66098857	66099857
chr10	128185062	128186062
chr12	60178580	60179580
chr14	61252779	61253779
chr16	10732183	10733183
chr16	30510250	30511250
chr17	66073270	66074270
chr2	72092742	72093742
chr3	32428002	32429002
chr4	80520091	80521091
chr4	151724520	151725520
chr5	137786790	137787790
chr7	38747026	38748026
chr7	38814709	38815709
chr19	32942754	32943754
chr3	21923757	21924757
chr4	137860110	137861110
chr11	4782509	4783509
chr6	54379088	54380088
chr9	120735119	120736119
chr10	95402760	95403760
chr12	5220047	5221047
chr13	53217180	53218180
chr5	68322666	68323666
chr6	140541954	140542954
chr7	116756916	116757916
chr1	120827377	120828377
chr1	193541561	193542561
chr11	8948530	8949530
chr11	58012577	58013577
chr16	46849393	46850393
chr17	84261560	84262560
chr3	84232530	84233530
chr3	88520281	88521281
chr4	55599865	55600865
chr4	115317692	115318692
chr4	149163574	149164574
chr5	8996771	8997771
chr6	127195476	127196476
chr6	136609932	136610932
chr9	54563275	54564275
chr9	61793474	61794474
chr11	87782031	87783031
chr6	54246953	54247953
chr7	25331580	25332580
chr9	106654082	106655082
chr1	136253691	136254691
chr10	42659648	42660648
chr11	57458117	57459117
chr11	62091138	62092138
chr12	86812731	86813731
chr13	20475438	20476438
chr13	54326990	54327990
chr16	9672167	9673167
chr18	38011468	38012468
chr2	160877637	160878637
chr4	59029619	59030619
chr4	125095092	125096092
chr4	153675350	153676350
chr8	128433447	128434447
chr1	180298679	180299679
chr10	17018428	17019428
chr10	59411267	59412267
chr11	103675830	103676830
chr16	32722945	32723945
chr19	58821754	58822754
chr5	91305822	91306822
chr1	167147031	167148031
chr10	9425995	9426995
chr12	81184586	81185586
chr7	74351131	74352131
chr15	72948061	72949061
chr17	79007150	79008150
chr5	135114817	135115817
chr7	30773786	30774786
chr10	16729548	16730548
chr10	88289081	88290081
chr11	98966970	98967970
chr15	86114903	86115903
chr16	18411591	18412591
chr16	24365829	24366829
chr17	26659395	26660395
chr17	46140932	46141932
chr18	38549055	38550055
chr19	9040979	9041979
chr19	29037875	29038875
chr2	140722140	140723140
chr3	63215822	63216822
chr4	116493744	116494744
chr7	16940897	16941897
chr8	47530912	47531912
chr2	113197337	113198337
chr1	183216046	183217046
chr11	65601380	65602380
chr13	38262356	38263356
chr17	48110520	48111520
chr3	41088453	41089453
chr4	106860992	106861992
chr6	7797894	7798894
chr7	4054681	4055681
chr7	31758702	31759702
chr7	52000180	52001180
chr8	13506548	13507548
chr8	91841600	91842600
chr14	11401278	11402278
chr9	44298478	44299478
chr10	21160463	21161463
chr10	79495188	79496188
chr13	73592460	73593460
chr10	94977066	94978066
chr11	115137997	115138997
chr14	46675384	46676384
chr15	75845281	75846281
chr17	48683731	48684731
chr19	4268738	4269738
chr4	43591108	43592108
chr8	95826386	95827386
chr9	65062290	65063290
chr13	112900034	112901034
chr16	30815844	30816844
chr19	11893993	11894993
chr3	65761772	65762772
chr5	91069137	91070137
chr7	56004298	56005298
chr8	125110328	125111328
chr11	75595126	75596126
chr1	159455697	159456697
chr14	15472178	15473178
chr14	69859245	69860245
chr17	81185907	81186907
chr19	3692130	3693130
chr2	166462350	166463350
chr7	134170480	134171480
chr7	152268525	152269525
chr8	119139976	119140976
chr8	122467695	122468695
chr11	77498951	77499951
chr11	90057471	90058471
chr12	70618263	70619263
chr13	20525037	20526037
chr2	127997730	127998730
chr4	55015636	55016636
chr5	141421684	141422684
chr13	59555468	59556468
chr16	33595245	33596245
chr2	84651176	84652176
chr2	119326747	119327747
chr3	8923014	8924014
chr8	27642639	27643639
chr9	66969202	66970202
chr9	67108438	67109438
chr1	136699603	136700603
chr1	193670257	193671257
chr11	5855223	5856223
chr13	69641413	69642413
chr14	30821645	30822645
chr19	24678272	24679272
chr4	34725061	34726061
chr7	142250981	142251981
chr16	38522371	38523371
chr7	117935995	117936995
chr7	150392642	150393642
chr9	62254025	62255025
chr1	133049248	133050248
chr10	24473818	24474818
chr4	140714724	140715724
chr1	121545068	121546068
chr1	178743774	178744774
chr11	11821504	11822504
chr11	12311713	12312713
chr17	46131131	46132131
chr17	86635878	86636878
chr3	65778188	65779188
chr3	85684241	85685241
chr5	33994819	33995819
chr7	134530190	134531190
chr8	97491184	97492184
chr1	51534877	51535877
chr11	23981489	23982489
chr13	49311030	49312030
chr15	54402376	54403376
chr17	36220815	36221815
chr2	71380742	71381742
chr3	40508395	40509395
chr3	152014993	152015993
chr4	4720004	4721004
chr8	47060207	47061207
chr9	63837224	63838224
chr9	64047365	64048365
chr11	20713619	20714619
chr1	51565662	51566662
chr1	92805851	92806851
chr13	116461576	116462576
chr14	25925638	25926638
chr17	83882162	83883162
chr18	38726054	38727054
chr3	107544232	107545232
chr5	136737804	136738804
chr8	92901619	92902619
chr9	99369953	99370953
chr10	62501354	62502354
chr16	76293736	76294736
chr2	60004569	60005569
chr5	144201846	144202846
chr7	96486795	96487795
chr9	65283097	65284097
chr8	79168111	79169111
chr10	128375750	128376750
chr11	57337753	57338753
chr11	98957450	98958450
chr13	45443461	45444461
chr13	47288772	47289772
chr14	55352697	55353697
chr15	53128784	53129784
chr15	54943401	54944401
chr15	84585083	84586083
chr16	30194697	30195697
chr17	36326800	36327800
chr3	30067046	30068046
chr4	87630195	87631195
chr4	106471953	106472953
chr4	137881022	137882022
chr4	153439118	153440118
chr7	71202509	71203509
chr8	47090234	47091234
chr8	98357145	98358145
chr9	61162311	61163311
chr1	166922977	166923977
chr10	58703579	58704579
chr11	112787693	112788693
chr15	79116300	79117300
chr2	102781990	102782990
chr4	49054233	49055233
chr6	61064973	61065973
chr6	149049661	149050661
chr7	121397686	121398686
chr8	23234350	23235350
chr16	38452224	38453224
chr2	167682094	167683094
chr4	107238645	107239645
chr6	54940889	54941889
chr13	41498853	41499853
chr13	113253624	113254624
chr16	24199975	24200975
chr9	100953447	100954447
chr10	94615070	94616070
chr12	112775743	112776743
chr15	82839370	82840370
chr15	96400259	96401259
chr17	74958916	74959916
chr2	68683163	68684163
chr5	117565458	117566458
chr8	116656995	116657995
chr1	133166541	133167541
chr12	111442125	111443125
chr15	78064159	78065159
chr19	44845745	44846745
chr19	44973296	44974296
chr19	60965601	60966601
chr3	89159239	89160239
chr3	138374596	138375596
chr3	145812707	145813707
chr4	11932902	11933902
chr4	122632339	122633339
chr4	140160191	140161191
chr5	137446096	137447096
chr7	119497901	119498901
chr8	58598451	58599451
chr8	75094620	75095620
chr5	92849099	92850099
chr9	31659009	31660009
chr13	77847466	77848466
chr13	81524320	81525320
chr14	69873296	69874296
chr15	34011866	34012866
chr17	86843828	86844828
chr19	40644875	40645875
chr1	153936997	153937997
chr10	92184733	92185733
chr12	3836903	3837903
chr13	6255086	6256086
chr14	70897204	70898204
chr16	37584353	37585353
chr3	9833597	9834597
chr4	106975137	106976137
chr5	141866223	141867223
chr9	40630033	40631033
chr1	121933548	121934548
chr11	3831571	3832571
chr11	8910655	8911655
chr16	30587509	30588509
chr17	24986979	24987979
chr19	12562265	12563265
chr3	137907256	137908256
chr4	55739706	55740706
chr4	104743224	104744224
chr7	71041454	71042454
chr8	108895124	108896124
chr9	75203325	75204325
chr10	125456391	125457391
chr15	10688292	10689292
chr15	81059973	81060973
chr17	15701188	15702188
chr17	26753309	26754309
chr18	65899111	65900111
chr4	55605210	55606210
chr4	102887323	102888323
chr4	108110389	108111389
chr4	127049876	127050876
chr12	77116201	77117201
chr12	85028586	85029586
chr13	48985393	48986393
chr17	86678140	86679140
chr19	5924365	5925365
chr2	22923187	22924187
chr4	150082020	150083020
chr14	52962993	52963993
chr15	101327334	101328334
chr2	163249143	163250143
chr4	124804691	124805691
chr9	75161473	75162473
chr10	118551411	118552411
chr11	90130107	90131107
chr17	71056459	71057459
chr5	73100897	73101897
chr5	101000857	101001857
chr5	132208874	132209874
chr6	135276592	135277592
chr7	149779309	149780309
chr1	138447174	138448174
chr10	40726129	40727129
chr11	62837381	62838381
chr11	101536380	101537380
chr14	12335965	12336965
chr14	26025498	26026498
chr14	60347137	60348137
chr15	36599117	36600117
chr19	11089651	11090651
chr19	34364640	34365640
chr19	55498138	55499138
chr4	83268921	83269921
chr5	46423169	46424169
chr5	152035586	152036586
chr7	111729057	111730057
chr8	117964990	117965990
chr9	106149704	106150704
chr19	53349740	53350740
chr2	143959223	143960223
chr4	94807558	94808558
chr5	46573125	46574125
chr5	64327653	64328653
chr7	105578980	105579980
chr4	128501161	128502161
chr9	109842319	109843319
chr10	26539837	26540837
chr10	68681320	68682320
chr12	72909279	72910279
chr15	81779800	81780800
chr16	91277409	91278409
chr17	27202764	27203764
chr19	5388298	5389298
chr2	129054822	129055822
chr2	164311569	164312569
chr3	85497754	85498754
chr5	147774799	147775799
chr6	37391746	37392746
chr7	20262968	20263968
chr7	137736215	137737215
chr8	93672482	93673482
chr8	105797064	105798064
chr9	58907523	58908523
chr1	99922198	99923198
chr1	193047780	193048780
chr9	47062046	47063046
chr10	39332527	39333527
chr10	79399598	79400598
chr11	4723305	4724305
chr12	7826840	7827840
chr12	41827426	41828426
chr13	93961957	93962957
chr13	101345630	101346630
chr13	115721859	115722859
chr17	34340972	34341972
chr17	53536329	53537329
chr19	46088724	46089724
chr2	26063387	26064387
chr2	72017315	72018315
chr3	52300599	52301599
chr4	132583782	132584782
chr4	133898946	133899946
chr6	108520631	108521631
chr7	111655914	111656914
chr7	119351964	119352964
chr8	36414956	36415956
chr9	77277143	77278143
chr17	34999030	35000030
chr2	32177138	32178138
chr2	158619993	158620993
chr4	107737405	107738405
chr6	34482640	34483640
chr7	116736872	116737872
chr7	124618280	124619280
chr1	162614042	162615042
chr10	99477853	99478853
chr17	26380737	26381737
chr17	83775908	83776908
chr2	103324851	103325851
chr5	20878007	20879007
chr7	87204983	87205983
chr11	94250979	94251979
chr9	40274145	40275145
chr1	4797711	4798711
chr1	94816989	94817989
chr1	159252913	159253913
chr18	11485042	11486042
chr2	150048490	150049490
chr5	44300120	44301120
chr5	117728882	117729882
chr6	83007540	83008540
chr8	109914312	109915312
chr8	124984148	124985148
chr1	64833844	64834844
chr1	135419082	135420082
chr1	173275302	173276302
chr1	193059732	193060732
chr10	60875666	60876666
chr10	74891415	74892415
chr19	47928961	47929961
chr19	55581970	55582970
chr3	37056821	37057821
chr3	94113548	94114548
chr3	99545086	99546086
chr4	107039843	107040843
chr5	122311690	122312690
chr7	4894567	4895567
chr7	53283704	53284704
chr8	13462098	13463098
chr8	72928793	72929793
chr15	38448706	38449706
chr4	124385944	124386944
chr5	45882665	45883665
chr10	60231137	60232137
chr11	108908505	108909505
chr2	180920945	180921945
chr4	123464452	123465452
chr9	80161101	80162101
chr10	126862539	126863539
chr11	72288108	72289108
chr12	8506457	8507457
chr12	118663427	118664427
chr14	60378667	60379667
chr15	78611043	78612043
chr18	55130281	55131281
chr19	43964667	43965667
chr2	150684181	150685181
chr3	30850893	30851893
chr5	74555584	74556584
chr6	37542361	37543361
chr17	36304226	36305226
chr1	194547042	194548042
chr10	6805837	6806837
chr10	89148615	89149615
chr11	102558644	102559644
chr11	121312822	121313822
chr12	104938335	104939335
chr14	70419622	70420622
chr15	80534382	80535382
chr15	102126176	102127176
chr16	10581338	10582338
chr17	73903703	73904703
chr18	39816300	39817300
chr18	63163274	63164274
chr2	131222730	131223730
chr5	37541677	37542677
chr5	67009561	67010561
chr5	73047295	73048295
chr6	84221759	84222759
chr6	134556950	134557950
chr7	16618073	16619073
chr8	89147367	89148367
chr1	157099704	157100704
chr11	76703037	76704037
chr14	76510266	76511266
chr19	44462669	44463669
chr5	89358417	89359417
chr7	146420258	146421258
chr10	21524286	21525286
chr2	29904216	29905216
chr4	125757838	125758838
chr4	148540348	148541348
chr1	88050812	88051812
chr10	116432880	116433880
chr11	118279901	118280901
chr11	120623333	120624333
chr12	102068865	102069865
chr14	118400237	118401237
chr15	100651912	100652912
chr16	57452792	57453792
chr17	25152561	25153561
chr17	56017440	56018440
chr2	51828001	51829001
chr2	59276415	59277415
chr2	65158753	65159753
chr6	22305695	22306695
chr1	193505201	193506201
chr11	84742784	84743784
chr11	110305590	110306590
chr12	51221265	51222265
chr13	102235081	102236081
chr16	22027264	22028264
chr17	13025247	13026247
chr17	30984150	30985150
chr18	63984337	63985337
chr19	42342583	42343583
chr19	58833579	58834579
chr2	15181811	15182811
chr2	151368164	151369164
chr3	89111675	89112675
chr4	11502453	11503453
chr4	139036987	139037987
chr6	48487076	48488076
chr7	75420753	75421753
chr8	42028520	42029520
chr11	96498926	96499926
chr4	141179353	141180353
chr4	154201658	154202658
chr7	134943621	134944621
chr1	78397688	78398688
chr3	88397551	88398551
chr7	134985574	134986574
chr9	30234078	30235078
chr11	74451625	74452625
chr13	31408672	31409672
chr14	57468192	57469192
chr14	61321261	61322261
chr15	10915153	10916153
chr17	17371137	17372137
chr17	46419491	46420491
chr18	78087390	78088390
chr19	46226368	46227368
chr2	5597516	5598516
chr2	48258030	48259030
chr2	119302905	119303905
chr5	122192604	122193604
chr7	149381501	149382501
chr7	150660430	150661430
chr13	12618221	12619221
chr1	115386482	115387482
chr1	174562223	174563223
chr11	72950696	72951696
chr12	53532588	53533588
chr12	70891235	70892235
chr13	102834134	102835134
chr14	57193943	57194943
chr15	36304271	36305271
chr15	41747982	41748982
chr15	82758931	82759931
chr16	4904580	4905580
chr16	19464181	19465181
chr18	42670497	42671497
chr19	9092182	9093182
chr19	10134468	10135468
chr2	32091627	32092627
chr2	38386253	38387253
chr2	48296556	48297556
chr2	132403461	132404461
chr2	173901138	173902138
chr5	31948590	31949590
chr5	32878301	32879301
chr6	115542106	115543106
chr7	108027891	108028891
chr7	116776604	116777604
chr7	124632214	124633214
chr7	130252653	130253653
chr8	74762994	74763994
chr8	89421595	89422595
chr9	75169478	75170478
chr9	85275721	85276721
chr9	96789706	96790706
chr1	195152745	195153745
chr11	69317059	69318059
chr13	28575299	28576299
chr13	98414779	98415779
chr16	11909047	11910047
chr6	38831156	38832156
chr6	87942461	87943461
chr6	107423063	107424063
chr10	40180781	40181781
chr11	67738239	67739239
chr18	55890177	55891177
chr3	145753929	145754929
chr9	30938966	30939966
chr4	135357090	135358090
chr1	168290038	168291038
chr11	119175571	119176571
chr13	35717087	35718087
chr13	48608365	48609365
chr15	77241131	77242131
chr15	81252324	81253324
chr18	84898896	84899896
chr2	34760265	34761265
chr2	142491456	142492456
chr2	156832371	156833371
chr3	37622701	37623701
chr3	41545878	41546878
chr4	81640812	81641812
chr4	114659320	114660320
chr5	68238187	68239187
chr5	115414266	115415266
chr6	146990782	146991782
chr7	82581031	82582031
chr1	88966992	88967992
chr11	32505014	32506014
chr11	78736195	78737195
chr11	109759837	109760837
chr12	75228828	75229828
chr13	12548691	12549691
chr17	18111531	18112531
chr17	34092175	34093175
chr19	11319412	11320412
chr3	130411793	130412793
chr4	95461074	95462074
chr4	154524299	154525299
chr5	15240008	15241008
chr7	135891993	135892993
chr8	49986666	49987666
chr9	41660068	41661068
chr1	179726265	179727265
chr10	59206458	59207458
chr14	32643512	32644512
chr18	84819077	84820077
chr19	3574947	3575947
chr4	140752909	140753909
chr4	142751528	142752528
chr6	116236561	116237561
chr7	137777400	137778400
chr15	27362255	27363255
chr3	8923399	8924399
chr3	135003772	135004772
chr9	117948958	117949958
chr10	42940709	42941709
chr12	41750093	41751093
chr12	102010482	102011482
chr13	94609798	94610798
chr15	78727100	78728100
chr4	138111139	138112139
chr5	37117363	37118363
chr5	122803936	122804936
chr9	122664360	122665360
chr17	14709811	14710811
chr5	28535936	28536936
chr1	89212094	89213094
chr1	182655627	182656627
chr10	7740805	7741805
chr11	4537213	4538213
chr11	6525605	6526605
chr11	121479176	121480176
chr12	33776702	33777702
chr16	16212847	16213847
chr16	91747467	91748467
chr17	86918516	86919516
chr18	76194358	76195358
chr19	10560299	10561299
chr19	45856688	45857688
chr2	4994558	4995558
chr2	68258732	68259732
chr2	147655980	147656980
chr3	88665757	88666757
chr4	136944621	136945621
chr4	144599030	144600030
chr5	53604844	53605844
chr5	54376517	54377517
chr6	28705113	28706113
chr6	135301243	135302243
chr7	51925886	51926886
chr7	87301446	87302446
chr9	45827804	45828804
chr9	50554233	50555233
chr1	193017593	193018593
chr11	103514387	103515387
chr17	56083903	56084903
chr2	174593230	174594230
chr3	144216595	144217595
chr4	55527338	55528338
chr5	51973965	51974965
chr5	65089420	65090420
chr7	48854156	48855156
chr11	121065808	121066808
chr12	83466035	83467035
chr12	85104617	85105617
chr15	101848129	101849129
chr18	6136250	6137250
chr18	50287395	50288395
chr2	174573582	174574582
chr3	94910325	94911325
chr6	42237271	42238271
chr7	39021188	39022188
chr10	124607879	124608879
chr11	120878773	120879773
chr1	137162141	137163141
chr1	172185305	172186305
chr10	122347502	122348502
chr11	117065584	117066584
chr12	113051697	113052697
chr13	109858373	109859373
chr14	26573720	26574720
chr18	56863829	56864829
chr18	70084683	70085683
chr19	16855049	16856049
chr2	27282164	27283164
chr2	75592352	75593352
chr3	32588291	32589291
chr3	75760382	75761382
chr4	11642175	11643175
chr5	40125036	40126036
chr5	135122961	135123961
chr6	142520156	142521156
chr7	74582223	74583223
chr8	5859360	5860360
chr8	125947062	125948062
chr9	108280242	108281242
chr5	65105645	65106645
chr1	23960580	23961580
chr1	192655692	192656692
chr10	74756797	74757797
chr11	43439420	43440420
chr11	66755218	66756218
chr11	109567008	109568008
chr13	74146272	74147272
chr14	12335331	12336331
chr15	74357699	74358699
chr15	81675820	81676820
chr18	10846618	10847618
chr2	71369783	71370783
chr3	60871801	60872801
chr3	100647366	100648366
chr4	10857905	10858905
chr4	43012962	43013962
chr4	95600683	95601683
chr4	106910490	106911490
chr4	125735281	125736281
chr5	119127139	119128139
chr8	64113332	64114332
chr8	73051075	73052075
chr8	120224311	120225311
chr1	187135507	187136507
chr11	53893573	53894573
chr11	109211366	109212366
chr15	54946097	54947097
chr6	48414872	48415872
chr7	72584517	72585517
chr8	83426031	83427031
chr1	39316250	39317250
chr1	64988644	64989644
chr10	42964983	42965983
chr11	53371147	53372147
chr11	117060448	117061448
chr12	55896209	55897209
chr12	80883351	80884351
chr13	44825417	44826417
chr13	56780173	56781173
chr14	29211801	29212801
chr14	120805681	120806681
[truncated: 16,088 more rows]

## Sheet: HNF4A CV Only regions
Supplemental Table S8: HNF4A regions in CV only (related to Supplemental Fig. S6C)
HNF4A - CV Only Peaks used for Supplemental Fig. 5C
chr1	12634389	12635389
chr1	45007595	45008595
chr1	46547868	46548868
chr1	67145456	67146456
chr1	71883480	71884480
chr1	87548406	87549406
chr1	87900557	87901557
chr1	107868093	107869093
chr1	108208119	108209119
chr1	125199890	125200890
chr1	151756358	151757358
chr1	181057233	181058233
chr1	185398405	185399405
chr1	189049972	189050972
chr1	195053560	195054560
chr10	4536742	4537742
chr10	8527863	8528863
chr10	36934149	36935149
chr10	39908110	39909110
chr10	42221005	42222005
chr10	51282027	51283027
chr10	52248130	52249130
chr10	57696103	57697103
chr10	59164499	59165499
chr10	66384701	66385701
chr10	71759484	71760484
chr10	74517217	74518217
chr10	74684348	74685348
chr10	79338323	79339323
chr10	84226119	84227119
chr10	86162703	86163703
chr10	89096173	89097173
chr11	3026739	3027739
chr11	3027083	3028083
chr11	3079743	3080743
chr11	11693439	11694439
chr11	20924283	20925283
chr11	24409073	24410073
chr11	52557184	52558184
chr11	55814604	55815604
chr11	59995552	59996552
chr11	60623240	60624240
chr11	72612764	72613764
chr11	72663918	72664918
chr11	97436688	97437688
chr11	97522943	97523943
chr11	98789144	98790144
chr11	99638498	99639498
chr11	101958122	101959122
chr11	107084706	107085706
chr11	110472489	110473489
chr11	117171975	117172975
chr12	4843210	4844210
chr12	8516848	8517848
chr12	8952004	8953004
chr12	32370567	32371567
chr12	34114196	34115196
chr12	34114429	34115429
chr12	70259833	70260833
chr12	78727424	78728424
chr12	80242038	80243038
chr12	80632713	80633713
chr12	109050172	109051172
chr12	109937508	109938508
chr13	13952708	13953708
chr13	24378906	24379906
chr13	38516803	38517803
chr13	44060198	44061198
chr13	44964844	44965844
chr13	54481465	54482465
chr13	75705526	75706526
chr13	76392499	76393499
chr13	77443750	77444750
chr13	101172542	101173542
chr13	104770314	104771314
chr13	110938378	110939378
chr13	112527317	112528317
chr13	113367942	113368942
chr13	115188257	115189257
chr14	22921915	22922915
chr14	28635917	28636917
chr14	32198865	32199865
chr14	56232010	56233010
chr14	59277078	59278078
chr14	74465276	74466276
chr14	80000238	80001238
chr14	91310516	91311516
chr14	100043298	100044298
chr14	104507337	104508337
chr14	118574630	118575630
chr15	11209058	11210058
chr15	47371112	47372112
chr15	59513999	59514999
chr15	73101755	73102755
chr15	74915750	74916750
chr15	75932931	75933931
chr15	81790933	81791933
chr15	86024743	86025743
chr15	91739685	91740685
chr15	98507250	98508250
chr15	98562212	98563212
chr16	13538291	13539291
chr16	18532856	18533856
chr16	20363792	20364792
chr16	20672137	20673137
chr16	25564944	25565944
chr16	29816529	29817529
chr16	29910697	29911697
chr16	46919103	46920103
chr16	76561122	76562122
chr17	7607856	7608856
chr17	13419739	13420739
chr17	13512104	13513104
chr17	13808535	13809535
chr17	23012961	23013961
chr17	24831938	24832938
chr17	28830713	28831713
chr17	35079833	35080833
chr17	48575029	48576029
chr17	56338971	56339971
chr17	85450328	85451328
chr18	3115197	3116197
chr18	13107307	13108307
chr18	34303779	34304779
chr18	36838536	36839536
chr18	36838716	36839716
chr18	48169617	48170617
chr18	69464923	69465923
chr18	76330829	76331829
chr18	81075595	81076595
chr18	81515985	81516985
chr18	82389926	82390926
chr19	5355691	5356691
chr19	6121469	6122469
chr19	25320223	25321223
chr19	58000604	58001604
chr19	58856040	58857040
chr1_random	845197	846197
chr2	50035612	50036612
chr2	56976338	56977338
chr2	62958367	62959367
chr2	102740949	102741949
chr2	129428949	129429949
chr2	156758590	156759590
chr2	158128261	158129261
chr2	166990043	166991043
chr2	169520216	169521216
chr2	173532785	173533785
chr2	178341115	178342115
chr3	8245875	8246875
chr3	9662992	9663992
chr3	28132859	28133859
chr3	63617728	63618728
chr3	69033503	69034503
chr3	84964203	84965203
chr3	96377945	96378945
chr3	128639183	128640183
chr3	139135253	139136253
chr3	143806766	143807766
chr3	144486326	144487326
chr3	145425506	145426506
chr3	148670877	148671877
chr4	3091902	3092902
chr4	3107057	3108057
chr4	3107362	3108362
chr4	29060525	29061525
chr4	48345230	48346230
chr4	89230846	89231846
chr4	95605292	95606292
chr4	99047676	99048676
chr4	102123904	102124904
chr4	114581188	114582188
chr4	116024740	116025740
chr4	122132046	122133046
chr4	125858655	125859655
chr4	134894144	134895144
chr4	135751823	135752823
chr4	135918236	135919236
chr4	136288807	136289807
chr4	137625413	137626413
chr4	141277500	141278500
chr4	148158592	148159592
chr4	152526730	152527730
chr4	155191319	155192319
chr5	3927642	3928642
chr5	4758107	4759107
chr5	15352303	15353303
chr5	38903680	38904680
chr5	43910798	43911798
chr5	89444600	89445600
chr5	93678929	93679929
chr5	104560251	104561251
chr5	115487537	115488537
chr5	122793545	122794545
chr5	140205853	140206853
chr5	140675508	140676508
chr5	148422560	148423560
chr5	151900042	151901042
chr6	4711983	4712983
chr6	8115116	8116116
chr6	28824513	28825513
chr6	40296426	40297426
chr6	47601198	47602198
chr6	54118386	54119386
chr6	87018935	87019935
chr6	100800331	100801331
chr6	108787683	108788683
chr6	112778809	112779809
chr6	116333404	116334404
chr6	119357542	119358542
chr6	120580500	120581500
chr6	121091925	121092925
chr6	121176570	121177570
chr6	131327070	131328070
chr6	132413279	132414279
chr6	136756000	136757000
chr7	7230143	7231143
chr7	12596542	12597542
chr7	17459111	17460111
chr7	67011021	67012021
chr7	67012054	67013054
chr7	67048936	67049936
chr7	87853018	87854018
chr7	105208057	105209057
chr7	126659415	126660415
chr7	130322469	130323469
chr7	147406693	147407693
chr7	150254376	150255376
chr7	152151075	152152075
chr7	152219823	152220823
chr8	4333714	4334714
chr8	9975463	9976463
chr8	19759656	19760656
chr8	36197501	36198501
chr8	56201661	56202661
chr8	56204516	56205516
chr8	56208285	56209285
chr8	57978323	57979323
chr8	70021279	70022279
chr8	72596622	72597622
chr8	73956528	73957528
chr8	80052476	80053476
chr8	80298645	80299645
chr8	82554975	82555975
chr8	108282089	108283089
chr8	111079510	111080510
chr8_random	679728	680728
chr8_random	680688	681688
chr8_random	819236	820236
chr9	31810141	31811141
chr9	50443240	50444240
chr9	54623968	54624968
chr9	55901283	55902283
chr9	61251326	61252326
chr9	85060618	85061618
chr9	96685844	96686844
chr9	101230502	101231502
chr9	109797803	109798803
chr9	110792161	110793161
chrX	4544919	4545919
chrX	11224265	11225265
chrX	38300885	38301885
chrX	81288840	81289840
chrX	84483209	84484209
chrX	97831875	97832875
chrX	125590636	125591636
chrX	166438126	166439126

## Sheet: HNF4A CV regions
Supplemental Table S8: HNF4A regions in CV (related to Supplemental Fig. S6A,B)
HNF4A CV regions used in Supplementary Fig. 5A,B
chr9	123370871	123371371
chr4	119851776	119852276
chrX	166436708	166437208
chr11	57613777	57614277
chr11	3079986	3080486
chr17	39984244	39984744
chr1	58670570	58671070
chr17	39980936	39981436
chr15	85535878	85536378
chr17	39984574	39985074
chr6	3151260	3151760
chr11	108872904	108873404
chr8	114245512	114246012
chr15	97711765	97712265
chr6	29697700	29698200
chr11	3068607	3069107
chr6	83372234	83372734
chr6	49186270	49186770
chr9	102685436	102685936
chr4	138559977	138560477
chr16	76453974	76454474
chr3	108517679	108518179
chr5	143671334	143671834
chr12	77577043	77577543
chrX	166438381	166438881
chr8	87513296	87513796
chr12	113368216	113368716
chr9	102890702	102891202
chr11	118967664	118968164
chr5	120126232	120126732
chr2	50004989	50005489
chr11	115738522	115739022
chr2	76350232	76350732
chr11	83830465	83830965
chr2	62289580	62290080
chr6	39193535	39194035
chr1	34179594	34180094
chr14	69932467	69932967
chr3	87312927	87313427
chrX	125590895	125591395
chr12	53549074	53549574
chr17	24126023	24126523
chr16	57391432	57391932
chr4	137904515	137905015
chr12	21162797	21163297
chr18	36685788	36686288
chr6	54176978	54177478
chr8	73321615	73322115
chr4	118220937	118221437
chr8	122965482	122965982
chrUn_random	5248653	5249153
chr11	94019605	94020105
chr10	66383780	66384280
chr15	76024265	76024765
chr7	109131303	109131803
chr11	20233029	20233529
chr11	98307762	98308262
chr11	79584987	79585487
chr16	17222209	17222709
chr1	134022321	134022821
chr2	75542993	75543493
chr11	69510895	69511395
chr17	39983967	39984467
chr18	50288289	50288789
chr1	193463895	193464395
chr12	78299199	78299699
chr2	24943316	24943816
chr15	10820030	10820530
chr15	75684378	75684878
chrX	109484281	109484781
chr2	25079234	25079734
chr4	132316166	132316666
chr9	98390636	98391136
chr11	53571041	53571541
chr2	27541829	27542329
chr18	68851538	68852038
chr14	51617694	51618194
chr17	29716593	29717093
chr5	106131529	106132029
chr4	53329497	53329997
chr5	37089412	37089912
chr7	16618419	16618919
chr16	24366100	24366600
chr15	85584579	85585079
chr7	107643442	107643942
chr7	129362854	129363354
chr8	90733705	90734205
chr1	138466110	138466610
chr1	156904655	156905155
chr9	121966929	121967429
chr17	6932234	6932734
chr12	86454292	86454792
chr11	98796299	98796799
chr6	3150673	3151173
chr16	18533091	18533591
chr11	66849721	66850221
chr13	37741268	37741768
chr6	125330806	125331306
chr12	81233349	81233849
chr10	3154105	3154605
chr12	102013860	102014360
chr3	157656313	157656813
chr17	3245262	3245762
chr14	21049310	21049810
chr18	74899477	74899977
chr8	126497380	126497880
chr19	4056309	4056809
chr17	64592197	64592697
chr4	119332458	119332958
chr9	56071419	56071919
chr7	150937927	150938427
chr6	53985524	53986024
chr17	86832109	86832609
chr2	27527049	27527549
chr19	21568516	21569016
chr7	26400618	26401118
chr19	5494201	5494701
chr12	113555343	113555843
chr4	141123055	141123555
chr14	73774028	73774528
chr4	148160036	148160536
chr4	141285108	141285608
chr5	33080067	33080567
chr14	9208905	9209405
chr4	3866285	3866785
chr7	97209059	97209559
chr8	60128770	60129270
chr2	33219373	33219873
chr10	78995833	78996333
chr8	86058636	86059136
chr17	29186965	29187465
chr7	26177063	26177563
chr15	83282695	83283195
chr17	59152582	59153082
chr1	90150022	90150522
chr15	76526350	76526850
chr15	80019303	80019803
chr1	184198378	184198878
chr6	124327503	124328003
chr9	85014541	85015041
chr4	106291475	106291975
chr11	60279543	60280043
chr17	30220264	30220764
chr19	53380095	53380595
chr16	91454941	91455441
chr14	31448642	31449142
chr11	69177849	69178349
chr13	113368205	113368705
chr7	130609524	130610024
chr5	31246622	31247122
chr19	34681922	34682422
chr11	94494294	94494794
chr19	55321972	55322472
chr7	86879353	86879853
chr11	119960519	119961019
chr12	113053576	113054076
chr6	55287919	55288419
chr1	69503135	69503635
chr3	89082057	89082557
chr8	36730211	36730711
chr1	39243807	39244307
chr14	27700421	27700921
chr16	58519961	58520461
chr7	4121791	4122291
chr8	84939360	84939860
chr14	76967038	76967538
chr3	145860240	145860740
chr9	66545556	66546056
chr7	91299121	91299621
chr6	128611202	128611702
chr4	148277521	148278021
chr8	13698241	13698741
chr5	65101436	65101936
chr9	101155441	101155941
chr12	114350663	114351163
chr17	29061817	29062317
chr2	173844454	173844954
chr11	12311310	12311810
chr18	12806280	12806780
chr3	109381084	109381584
chr13	35055654	35056154
chr11	61132659	61133159
chr16	91565219	91565719
chr2	25011691	25012191
chr10	79519318	79519818
chr13	35057544	35058044
chr13	31271118	31271618
chr11	120437918	120438418
chr11	76835226	76835726
chr4	62164041	62164541
chr8	70019165	70019665
chr10	26493297	26493797
chr13	44965098	44965598
chr17	23897448	23897948
chr3	101310820	101311320
chr4	53036296	53036796
chr15	82624731	82625231
chr1_random	412278	412778
chr7	126811374	126811874
chr11	78107956	78108456
chr8	11473050	11473550
chr17	24174399	24174899
chr2	119054357	119054857
chr3	101472894	101473394
chr12	78599120	78599620
chr17	65966328	65966828
chr16	97955202	97955702
chr7	105503344	105503844
chr4	150063752	150064252
chr7	143649435	143649935
chr11	120478268	120478768
chr19	41890802	41891302
chr12	8541678	8542178
chr13	25069554	25070054
chr17	24119796	24120296
chr7	105672696	105673196
chr17	48686914	48687414
chr13	74454135	74454635
chr4	55617816	55618316
chr2	26456233	26456733
chr6	125113763	125114263
chr4	147276917	147277417
chr15	57536754	57537254
chr18	33369155	33369655
chr14	57223145	57223645
chr15	75724730	75725230
chr4	148212278	148212778
chr11	69191189	69191689
chr7	24897961	24898461
chr11	5639666	5640166
chr6	28419958	28420458
chr15	102212190	102212690
chr5	122053739	122054239
chr11	52175003	52175503
chr11	118906325	118906825
chr2	144023960	144024460
chr17	27957665	27958165
chr19	40565870	40566370
chr8	73160799	73161299
chr11	118843590	118844090
chr15	38489865	38490365
chr1	158839402	158839902
chr11	116070513	116071013
chr4	148052788	148053288
chr15	76520656	76521156
chr13	43881763	43882263
chr9	108027276	108027776
chr16	21865229	21865729
chr11	96890990	96891490
chr7	130587984	130588484
chr4	132291753	132292253
chr2	167713419	167713919
chr4	148177085	148177585
chr18	38367375	38367875
chr5	96824889	96825389
chr2	4794419	4794919
chr6	34361909	34362409
chr2	27404021	27404521
chr18	65116732	65117232
chr17	35047921	35048421
chr14	58395723	58396223
chr4	62354723	62355223
chr6	3150966	3151466
chr11	70551113	70551613
chr9	102925709	102926209
chr10	61119694	61120194
chr13	3752495	3752995
chr1	197067636	197068136
chr15	32156660	32157160
chr13	5862777	5863277
chr9	106341251	106341751
chr9	121781100	121781600
chr10	120923211	120923711
chr16	28927458	28927958
chr18	32299065	32299565
chr16	11070122	11070622
chr1	137065311	137065811
chr6	114346538	114347038
chr11	57515090	57515590
chr2	24943157	24943657
chr10	81011544	81012044
chr17	6300355	6300855
chr14	69931250	69931750
chr2	72635360	72635860
chr18	34198398	34198898
chr5	64989732	64990232
chr14	121870644	121871144
chr19	57439413	57439913
chr18	36546487	36546987
chr13	64132043	64132543
chr13	44161069	44161569
chr11	74570077	74570577
chr17	4921110	4921610
chr19	57478237	57478737
chr10	127303255	127303755
chr9	106060240	106060740
chr16	18653315	18653815
chr12	60112179	60112679
chr13	45395901	45396401
chr16	34029825	34030325
chr7	20428384	20428884
chr17	35261431	35261931
chr10	93615888	93616388
chr11	51569063	51569563
chr3	27218545	27219045
chr3	129281702	129282202
chr6	48825509	48826009
chr11	72288383	72288883
chr2	180049005	180049505
chr2	179980025	179980525
chr1	89788975	89789475
chr4	128787590	128788090
chr10	114796032	114796532
chr10	127325696	127326196
chr12	70495886	70496386
chr5	53060497	53060997
chr2	27404231	27404731
chr12	102033771	102034271
chr12	73886045	73886545
chr7	87080337	87080837
chr19	3691211	3691711
chr7	148525848	148526348
chr10	127098274	127098774
chr15	76372873	76373373
chr17	29625115	29625615
chr13	24977703	24978203
chr6	87825558	87826058
chr2	121276018	121276518
chr10	127099357	127099857
chr2	181665740	181666240
chr19	18899081	18899581
chr15	3220687	3221187
chr17	87752089	87752589
chr8	19759928	19760428
chr4	82154182	82154682
chr6	84836502	84837002
chr11	35772750	35773250
chr15	102004040	102004540
chr6	115453014	115453514
chr7	133904986	133905486
chr12	78195994	78196494
chr4	40128648	40129148
chr11	62351859	62352359
chr15	100252036	100252536
chr9	46035102	46035602
chr4	141127294	141127794
chr4	41041755	41042255
chr17	3076889	3077389
chr11	119777398	119777898
chr8	97726486	97726986
chr2	173957935	173958435
chr4	132166137	132166637
chr8	97305533	97306033
chr10	96949965	96950465
chr19	44138218	44138718
chr11	62572339	62572839
chr1	37566785	37567285
chr8	97395411	97395911
chr2	157256288	157256788
chr7	4349361	4349861
chr11	115043198	115043698
chr14	56500836	56501336
chr12	101519620	101520120
chr11	86730100	86730600
chr12	112927552	112928052
chr2	60213673	60214173
chr2	129073528	129074028
chr17	46087371	46087871
chr12	78608626	78609126
chr12	7985207	7985707
chr14	31973327	31973827
chr6	124613353	124613853
chr4	40746040	40746540
chr17	29559846	29560346
chr15	31513048	31513548
chr10	127049167	127049667
chr13	112388230	112388730
chr11	118840103	118840603
chr2	72312441	72312941
chr2	157247581	157248081
chr13	41923605	41924105
chr18	65136129	65136629
chr5	93191368	93191868
chr12	80250499	80250999
chr3	101330442	101330942
chr7	29716560	29717060
chr3	137231888	137232388
chr15	81661599	81662099
chr8	12483503	12484003
chr4	98062741	98063241
chr5	4019266	4019766
chr5	51975479	51975979
chr11	7945024	7945524
chr19	4496438	4496938
chr17	29691012	29691512
chr19	34657568	34658068
chr4	154288818	154289318
chr4	128655847	128656347
chr5	53469754	53470254
chr9	106152017	106152517
chr2	38386640	38387140
chr14	69873557	69874057
chr8	81792746	81793246
chr17	24137519	24138019
chr11	116056561	116057061
chr14	46897447	46897947
chr18	12517467	12517967
chr5	115605705	115606205
chr10	39152386	39152886
chr4	124425045	124425545
chr1	95589998	95590498
chrX	166437300	166437800
chr12	103921552	103922052
chr11	69224575	69225075
chr1	137708559	137709059
chr4	62161727	62162227
chr12	100335275	100335775
chr18	60906211	60906711
chr17	34632015	34632515
chr4	132318494	132318994
chr8	13060640	13061140
chr12	103920337	103920837
chr3	118269693	118270193
chr15	63025696	63026196
chr2	165109885	165110385
chr1	171857034	171857534
chr17	56414612	56415112
chr17	6300064	6300564
chr16	21828236	21828736
chr9	61215549	61216049
chr7	151034535	151035035
chr11	116839630	116840130
chr3	122581763	122582263
chr3	27936174	27936674
chr11	95776038	95776538
chr8	72598096	72598596
chr19	21127190	21127690
chr8	86280552	86281052
chr12	78602793	78603293
chr5	140213917	140214417
chr7	134569768	134570268
chr5	137441598	137442098
chr9	121251785	121252285
chr17	6822317	6822817
chr1	196840338	196840838
chr7	148777997	148778497
chr4	104135550	104136050
chr8	73177001	73177501
chr3	73521464	73521964
chr1	153110399	153110899
chr15	82191719	82192219
chr11	94365517	94366017
chr1	140862081	140862581
chr7	105253133	105253633
chr15	75674565	75675065
chr1	169308003	169308503
chr7	128147435	128147935
chr4	62329612	62330112
chr10	61683821	61684321
chr11	53575888	53576388
chr13	73893150	73893650
chr7	120358254	120358754
chr2	24935544	24936044
chr10	62514768	62515268
chr11	120879083	120879583
chr7	106363283	106363783
chr14	25818397	25818897
chr15	74503308	74503808
chr3	80821359	80821859
chr2	25120515	25121015
chr1	91377807	91378307
chr4	134040949	134041449
chr9	50363198	50363698
chr1	187293231	187293731
chr7	106378485	106378985
chr17	28424583	28425083
chr15	31474834	31475334
chr7	112543847	112544347
chr6	135276542	135277042
chr7	108496881	108497381
chr2	172963722	172964222
chr1	166117230	166117730
chr1	170311498	170311998
chr6	131271800	131272300
chr17	44288758	44289258
chr9	62875837	62876337
chr11	74636437	74636937
chr3	122126544	122127044
chr8	4350571	4351071
chr9	88607150	88607650
chr4	97801410	97801910
chr3	94171377	94171877
chr4	45979514	45980014
chr17	34683602	34684102
chr10	111013014	111013514
chr2	75550940	75551440
chr5	37087703	37088203
chr2	14098049	14098549
chr2	128536281	128536781
chr2	77360238	77360738
chr17	35462863	35463363
chr6	71095607	71096107
chr2	160158702	160159202
chr9	44126421	44126921
chr9	57816604	57817104
chr17	89026473	89026973
chr19	40574382	40574882
chr17	78787370	78787870
chr3	107593067	107593567
chr2	32216047	32216547
chr7	134504870	134505370
chr3	30974796	30975296
chr9	51069557	51070057
chr4	11642483	11642983
chr15	98710865	98711365
chr8	118231246	118231746
chr3	151776400	151776900
chr1	156911100	156911600
chr2	4642322	4642822
chr11	119438967	119439467
chr4	57965248	57965748
chr18	42670690	42671190
chr18	21089717	21090217
chr15	76336034	76336534
chr7	31260008	31260508
chr8	126232686	126233186
chr17	15083510	15084010
chr11	118967492	118967992
chr19	41962597	41963097
chr12	82027403	82027903
chr3	101199989	101200489
chr3	88061398	88061898
chr11	97672841	97673341
chr2	119820544	119821044
chr5	140269158	140269658
chr18	39826714	39827214
chr15	77544077	77544577
chr3	52489251	52489751
chr2	30248816	30249316
chr6	58702343	58702843
chr14	21487637	21488137
chr8	97278390	97278890
chr17	6445172	6445672
chr7	86401552	86402052
chr1	132729320	132729820
chr18	54013387	54013887
chr10	98709674	98710174
chr5	89022426	89022926
chr16	8566489	8566989
chr5	137639569	137640069
chr5	28216442	28216942
chr2	27103844	27104344
chr2	112138373	112138873
chr16	30959742	30960242
chr4	117891074	117891574
chr3	38364991	38365491
chr5	53616637	53617137
chr19	9113692	9114192
chr7	29941375	29941875
chr8	64113584	64114084
chr13	91102383	91102883
chr17	37034420	37034920
chr12	85251356	85251856
chr5	37115481	37115981
chr15	9064430	9064930
chr11	117724668	117725168
chr7	108153690	108154190
chr8	73183088	73183588
chr2	164257543	164258043
chr4	133437702	133438202
chr1	135590688	135591188
chr5	37380350	37380850
chr4	41278705	41279205
chr4	131750911	131751411
chr17	34999164	34999664
chr9	70321115	70321615
chr18	85072597	85073097
chr7	35700533	35701033
chr10	79794726	79795226
chr6	83081367	83081867
chr8	67649837	67650337
chr5	36883580	36884080
chr17	3251936	3252436
chr19	57612150	57612650
chr6	72473022	72473522
chr7	29754776	29755276
chr9	107199028	107199528
chr2	170279243	170279743
chr12	7926629	7927129
chr3	157260970	157261470
chr11	101380627	101381127
chr8	109972940	109973440
chr11	75347855	75348355
chr9	46032160	46032660
chr11	95248584	95249084
chr17	36195329	36195829
chr9	121614309	121614809
chr2	167973494	167973994
chr17	6638178	6638678
chr2	165122893	165123393
chr7	139952965	139953465
chr11	31934431	31934931
chr17	36367994	36368494
chr14	47915872	47916372
chr17	71214686	71215186
chr10	74650087	74650587
chr15	36828794	36829294
chr7	52830338	52830838
chr9	46043635	46044135
chr5	136218673	136219173
chr11	22783653	22784153
chr8	74764240	74764740
chr4	141129479	141129979
chr7	53012630	53013130
chr10	80638818	80639318
chr8	124173826	124174326
chr15	36828422	36828922
chr15	36740828	36741328
chr19	10678719	10679219
chr9	56071237	56071737
chr6	145287327	145287827
chr12	85264050	85264550
chr6	87821160	87821660
chr1	58748497	58748997
chr9	121345545	121346045
chr9	108757676	108758176
chr2	160056558	160057058
chr7	97280170	97280670
chr6	148134090	148134590
chr9	63608103	63608603
chr3	145859764	145860264
chr15	99986665	99987165
chr13	114308298	114308798
chr4	116555204	116555704
chr1	178943477	178943977
chr3	10315590	10316090
chr15	99223965	99224465
chr11	69231012	69231512
chr11	96799159	96799659
chr8	27050858	27051358
chr1	182712006	182712506
chr5	108883051	108883551
chr18	40467564	40468064
chr16	8630367	8630867
chr12	88749078	88749578
chr16	76225430	76225930
chr15	73341531	73342031
chr11	62438365	62438865
chr7	4555707	4556207
chr1	88080184	88080684
chr5	138182793	138183293
chr6	134528032	134528532
chr7	139948082	139948582
chr3	130966920	130967420
chr2	29478634	29479134
chr10	79733549	79734049
chr6	58627723	58628223
chr9	43891516	43892016
chr2	25418009	25418509
chr2	76380968	76381468
chr10	44633528	44634028
chr19	3929512	3930012
chr5	31999731	32000231
chr2	68973484	68973984
chr9	57278916	57279416
chr11	98967206	98967706
chr7	87023412	87023912
chr9	58123912	58124412
chr2	155652546	155653046
chr19	5689516	5690016
chr7	117759273	117759773
chr5	37092035	37092535
chr2	60248351	60248851
chr15	100561502	100562002
chr18	66635001	66635501
chr4	154579908	154580408
chr5	137446401	137446901
chr6	131289234	131289734
chr5	124900838	124901338
chr6	58719568	58720068
chr5	32436704	32437204
chr14	46616450	46616950
chr4	136008582	136009082
chr16	87604102	87604602
chrX	45553794	45554294
chr18	38549277	38549777
chr15	96398683	96399183
chr6	86586346	86586846
chr18	60816368	60816868
chr17	34611973	34612473
chr10	69572541	69573041
chr10	24646691	24647191
chr19	4817025	4817525
chr10	79609310	79609810
chr5	109137415	109137915
chr6	136696210	136696710
chr2	4983867	4984367
chr16	97951821	97952321
chr10	19940156	19940656
chr5	122752999	122753499
chr8	73189510	73190010
chr13	56779454	56779954
chr4	135261867	135262367
chr10	117174153	117174653
chr7	53123686	53124186
chr18	32215527	32216027
chr11	6011705	6012205
chr16	28905603	28906103
chr2	72092897	72093397
chr12	74962479	74962979
chr14	32642927	32643427
chr13	103654019	103654519
chr9	51126368	51126868
chr2	33323178	33323678
chr10	125370441	125370941
chr11	120541254	120541754
chr11	54624554	54625054
chr13	102793457	102793957
chr4	123444893	123445393
chr1_random	413291	413791
chr16	38294728	38295228
chr6	134193418	134193918
chr18	39524102	39524602
chr6	83892715	83893215
chr2	27559410	27559910
chr11	117038913	117039413
chr10	6806087	6806587
chr12	60106363	60106863
chr17	13501846	13502346
chr9	43071853	43072353
chr17	34653372	34653872
chr19	58954049	58954549
chr5	91328378	91328878
chr8	118588322	118588822
chr8	87504032	87504532
chr17	84536691	84537191
chr10	125314379	125314879
chr5	144166912	144167412
chr11	60651085	60651585
chr4	55731357	55731857
chr2	25413512	25414012
chr4	107051523	107052023
chr17	24984175	24984675
chr4	138979110	138979610
chr14	12698357	12698857
chr3	142407990	142408490
chr17	49444354	49444854
chr8	18662901	18663401
chr5	121692617	121693117
chr5	64907260	64907760
chr2	129058117	129058617
chr4	119862276	119862776
chr6	90401188	90401688
chr12	84919855	84920355
chr8	46048126	46048626
chr12	112218053	112218553
chr8	74693684	74694184
chr7	86417127	86417627
chr11	98287755	98288255
chr2	157334910	157335410
chr16	76202279	76202779
chr6	135338815	135339315
chr8	25537879	25538379
chr11	98441726	98442226
chr14	23933965	23934465
chr18	35331640	35332140
chr12	80414638	80415138
chr9	123092285	123092785
chr1	174413023	174413523
chr2	37578580	37579080
chr6	67172776	67173276
chr2	156912440	156912940
chr6	71186479	71186979
chr3	90045099	90045599
chr6	136497272	136497772
chr4	132563829	132564329
chr17	3082101	3082601
chr17	78814544	78815044
chr15	83135528	83136028
chr2	32372717	32373217
chr15	38207662	38208162
chr12	86454121	86454621
chr15	74397706	74398206
chr7	87205168	87205668
chr11	117911467	117911967
chr15	75966175	75966675
chr9	96789892	96790392
chr8	119516720	119517220
chr11	86492403	86492903
chr12	112913995	112914495
chr7	35698921	35699421
chr6	88201354	88201854
chr5	100809325	100809825
chr10	77044491	77044991
chr9	109798050	109798550
chr16	33772830	33773330
chr11	76758888	76759388
chr18	32217684	32218184
chr4	137417623	137418123
chr15	99217221	99217721
chr8	107449843	107450343
chr1	132726388	132726888
chr8	129353466	129353966
chr7	30036090	30036590
chr4	106658701	106659201
chr4	148863797	148864297
chr10	13213738	13214238
chr7	134126255	134126755
chr11	120046198	120046698
chr11	53837648	53838148
chr2	133579785	133580285
chr2	28488186	28488686
chr9	92278197	92278697
chr5	31227644	31228144
chr8	129298674	129299174
chr10	69353267	69353767
chr15	101327613	101328113
chr9	34938195	34938695
chr17	3077728	3078228
chr3	121517956	121518456
chr11	93822681	93823181
chr18	73915917	73916417
chr12	21148367	21148867
chr3	101306290	101306790
chr8	13462332	13462832
chr6	66853684	66854184
chr16	14004699	14005199
chr4	116494026	116494526
chr2	121966466	121966966
chr19	55498365	55498865
chr5	30558453	30558953
chr2	167631228	167631728
chr14	70457467	70457967
chr5	122305159	122305659
chr2	163249344	163249844
chr11	87406172	87406672
chr5	143543934	143544434
chr13	84373515	84374015
chr4	150288556	150289056
chr7	88268442	88268942
chr15	77760051	77760551
chr10	98684673	98685173
chr2	155663622	155664122
chr17	26117182	26117682
chr13	94930742	94931242
chr9	110597793	110598293
chr5	92633170	92633670
chr8	126371535	126372035
chr10	53837951	53838451
chr11	102007325	102007825
chr12	78078207	78078707
chr15	54050243	54050743
chr3	107672732	107673232
chr4	129555134	129555634
chr18	61031314	61031814
chr7	20263149	20263649
chr6	31348138	31348638
chr16	4777878	4778378
chr9	7857686	7858186
chr4	151510597	151511097
chr7	4676640	4677140
chr12	55413843	55414343
chr11	119355004	119355504
chr14	37784281	37784781
chr5	115139876	115140376
chr1	173365525	173366025
chr16	4556909	4557409
chr19	36628496	36628996
chr2	26466477	26466977
chr5	53079228	53079728
chr16	96041713	96042213
chr16	85144552	85145052
chr1	64834196	64834696
chr5	136258765	136259265
chr15	97776299	97776799
chr13	54797262	54797762
chr16	34081809	34082309
chr3	69676638	69677138
chr18	35277830	35278330
chr2	35165680	35166180
chr1	67125724	67126224
chr4	149531564	149532064
chr12	84920049	84920549
chr7	150990912	150991412
chr5	139793265	139793765
chr8	129097693	129098193
chr19	44095959	44096459
chr19	6994294	6994794
chr7	35814302	35814802
chr3	144275299	144275799
chr11	115138688	115139188
chr9	114907902	114908402
chr10	25239682	25240182
chr6	6135247	6135747
chr17	66940485	66940985
chr8	25616618	25617118
chr8	129247325	129247825
chr19	42146345	42146845
chr13	34396734	34397234
chr2	167241642	167242142
chr12	111458679	111459179
chr17	48597531	48598031
chr16	76223149	76223649
chr4	151534839	151535339
chr11	65590377	65590877
chr11	117869404	117869904
chr3	121912310	121912810
chr7	148622907	148623407
chr10	3214607	3215107
chr6	50314306	50314806
chr5	147753377	147753877
chr12	8871932	8872432
chr13	69783240	69783740
chr11	69774771	69775271
chr2	5518809	5519309
chr18	61395782	61396282
chr4	33348194	33348694
chr5	123485604	123486104
chr2	160072122	160072622
chr13	75363177	75363677
chr1	88997974	88998474
chr11	62848941	62849441
chr7	130605620	130606120
chr3	63321621	63322121
chr1	138016025	138016525
chr19	8789713	8790213
chr10	82398459	82398959
chr15	99530514	99531014
chr3	89192288	89192788
chr18	12387242	12387742
chr7	89920248	89920748
chr10	82587319	82587819
chr8	93672793	93673293
chr6	124920232	124920732
chr4	53198898	53199398
chr11	96048528	96049028
chr4	134047393	134047893
chr12	111680331	111680831
chr14	26285908	26286408
chr18	36646504	36647004
chr2	165947464	165947964
chr14	55028951	55029451
chr3	120966065	120966565
chr1	43456621	43457121
chr13	73833863	73834363
chr11	70443509	70444009
chr4	116361886	116362386
chr2	26476830	26477330
chr9	64068370	64068870
chr11	102966674	102967174
chr7	104914374	104914874
chr2	29628589	29629089
chr8	13200626	13201126
chr15	36772286	36772786
chr1	74743912	74744412
chr17	86921967	86922467
chr5	143530735	143531235
chr7	139925345	139925845
chr1	95408053	95408553
chr3	84039329	84039829
chr8	48921867	48922367
chr13	9833407	9833907
chr3	95688312	95688812
chr11	51581624	51582124
chr18	60766022	60766522
chr10	128356046	128356546
chr18	64778082	64778582
chr4	71783803	71784303
chr17	13501547	13502047
chr5	66489236	66489736
chr12	103837755	103838255
chr11	61165383	61165883
chr2	154215953	154216453
chr8	109108968	109109468
chr18	47492744	47493244
chr2	119124722	119125222
chr18	32313094	32313594
chr10	75106755	75107255
chr14	63864045	63864545
chr2	156279536	156280036
chr4	155428616	155429116
chr1	137075944	137076444
chr7	105533679	105534179
chr2	180931593	180932093
chr7	151575555	151576055
chr19	20730510	20731010
chr11	90225155	90225655
chr4	151724648	151725148
chr17	35422316	35422816
chr2	166041281	166041781
chr10	75573605	75574105
chr18	36574743	36575243
chr1	173433910	173434410
chr10	107661378	107661878
chr5	137403191	137403691
chr14	56377066	56377566
chr12	51374482	51374982
chr12	109489997	109490497
chr18	46579504	46580004
chr17	57201665	57202165
chr17	29579006	29579506
chr7	134264915	134265415
chr5	93267467	93267967
chr1	89805210	89805710
chr5	143674013	143674513
chr13	52074703	52075203
chr9	45010061	45010561
chr18	64816841	64817341
chr15	61281738	61282238
chr2	27482034	27482534
chr5	101073015	101073515
chr5	145120801	145121301
chr8	114271700	114272200
chr2	58999740	59000240
chr5	104464780	104465280
chr4	55714125	55714625
chr11	117065876	117066376
chr2	51826319	51826819
chr13	73894204	73894704
chr9	123587829	123588329
chr19	9066992	9067492
chr9	61239976	61240476
chr14	56204514	56205014
chr17	36266422	36266922
chr16	95889155	95889655
chr6	87822952	87823452
chr9	113977779	113978279
chr7	80733375	80733875
chr9	75215821	75216321
chr5	143573505	143574005
chr1	43204418	43204918
chr12	21246183	21246683
chr8	96887884	96888384
chr17	25406716	25407216
chr5	117815899	117816399
chr11	101228763	101229263
chr11	94450765	94451265
chr7	148306895	148307395
chr14	59819335	59819835
chr8	126339490	126339990
chr2	128547032	128547532
chr19	24303294	24303794
chr8	126344050	126344550
chr3	137784363	137784863
chr1	74455211	74455711
chr9	65519291	65519791
chr10	23516656	23517156
chr7	52963368	52963868
chr10	59411571	59412071
chr17	30144806	30145306
chr18	47594810	47595310
chr7	72937211	72937711
chr13	75972903	75973403
chr10	122176274	122176774
chr3	35619843	35620343
chr14	29212051	29212551
chr1	99477183	99477683
chr10	60295419	60295919
chr5	115420909	115421409
chr2	166011639	166012139
chr5	101275793	101276293
chr7	105267487	105267987
chr15	100292504	100293004
chr12	46024159	46024659
chr8	124830366	124830866
chr2	167496602	167497102
chr7	116776592	116777092
chr5	113600864	113601364
chr5	134906565	134907065
chr10	95901263	95901763
chr1	75121112	75121612
chr13	94929665	94930165
chr5	97393275	97393775
chr4	148544361	148544861
chr7	148574404	148574904
chr4	149488773	149489273
chr3	107780527	107781027
chr11	79985315	79985815
chr16	87670587	87671087
chr19	41932264	41932764
chr14	46635261	46635761
chr6	48361087	48361587
chr16	32740239	32740739
chr1	174391656	174392156
chr17	87169168	87169668
chr1	137071733	137072233
chr6	91649637	91650137
chr19	5518621	5519121
chr19	56622746	56623246
chr16	76317582	76318082
chr7	129217967	129218467
chr5	96831482	96831982
chr2	128005651	128006151
chr10	80449563	80450063
chr14	12442299	12442799
chr1	137707792	137708292
chr6	43242086	43242586
chr4	141115717	141116217
chr7	149391406	149391906
chr2	60098650	60099150
chr17	30497507	30498007
chr18	39543347	39543847
chr14	70753119	70753619
chr10	118202841	118203341
chr13	100971476	100971976
chr9	9267862	9268362
chr11	101450657	101451157
chr1	194638915	194639415
chr4	106361093	106361593
chr11	45676240	45676740
chr14	69920584	69921084
chr16	11002351	11002851
chr5	137399559	137400059
chr8	118591532	118592032
chr14	66492166	66492666
chr11	35545752	35546252
chr18	20712710	20713210
chr8	63752155	63752655
chr11	115282316	115282816
chr10	126862771	126863271
chr11	53717608	53718108
chr19	3831703	3832203
chr1	166347094	166347594
chr5	31252212	31252712
chr16	24034461	24034961
chr2	160175325	160175825
chr16	8603855	8604355
chr5	77536190	77536690
chr17	13337600	13338100
chr7	16951253	16951753
chr14	41842609	41843109
chr1	133171433	133171933
chr12	32082494	32082994
chr11	94935965	94936465
chr7	130511211	130511711
chr13	54684489	54684989
chr4	133882758	133883258
chr9	114853647	114854147
chr17	66123774	66124274
chr8	93349387	93349887
chr19	6263015	6263515
chr10	7383343	7383843
chr17	23987777	23988277
chr16	66022016	66022516
chr6	113662735	113663235
chr8	3587866	3588366
chr9	123032641	123033141
chr12	31758537	31759037
chr9	43034843	43035343
chr13	73900890	73901390
chr5	38889644	38890144
chr13	45550461	45550961
chr10	79495539	79496039
chr6	134680885	134681385
chr7	87854568	87855068
chr14	77222636	77223136
chr3	151828671	151829171
chr1	172911481	172911981
chr5	135456859	135457359
chr18	61839111	61839611
chr15	12295423	12295923
chr1	60725713	60726213
chr17	44271434	44271934
chr16	36087850	36088350
chr3	65463235	65463735
chr3	148085564	148086064
chr5	138367734	138368234
chr17	74862805	74863305
chr6	67038689	67039189
chr14	66890561	66891061
chr15	98492837	98493337
chr11	98766850	98767350
chr19	46858802	46859302
chr11	103202031	103202531
chr9	106693078	106693578
chr17	24111844	24112344
chr19	6974123	6974623
chr12	111682527	111683027
chr2	70680087	70680587
chr8	23501114	23501614
chr13	73850780	73851280
chr4	117912880	117913380
chr7	54297420	54297920
chr18	64727294	64727794
chr9	63510575	63511075
chr12	103053970	103054470
chr12	73886462	73886962
chr11	3027138	3027638
chr10	21324618	21325118
chr7	125754768	125755268
chr10	89210003	89210503
chr5	115434997	115435497
chr9	98252775	98253275
chr17	43242928	43243428
chr11	117739224	117739724
chr11	8563848	8564348
chr2	166019737	166020237
chr6	120404714	120405214
chr7	16578479	16578979
chr17	28819480	28819980
chr9	58052333	58052833
chr2	91802275	91802775
chr12	85741623	85742123
chr9	95721596	95722096
chr5	147753577	147754077
chr19	25053851	25054351
chr13	40947263	40947763
chr1	129153707	129154207
chr2	126381188	126381688
chr3	84018355	84018855
chr7	120321555	120322055
chr11	72317791	72318291
chr1	193462996	193463496
chr8	126239703	126240203
chr2	84912005	84912505
chr12	85644922	85645422
chr13	81470906	81471406
chr1	36131870	36132370
chr11	104107697	104108197
chr11	115211152	115211652
chr1	134046792	134047292
chr19	56535989	56536489
chr2	21167090	21167590
chr18	60882427	60882927
chr15	80076272	80076772
chr12	84937067	84937567
chr12	46170943	46171443
chr17	33061858	33062358
chr10	21210794	21211294
chr4	130262065	130262565
chr4	40127059	40127559
chr18	74661816	74662316
chr15	3172601	3173101
chr19	10051482	10051982
chr6	47444486	47444986
chr5	113648450	113648950
chr4	122938919	122939419
chr5	101061528	101062028
chr5	136121867	136122367
chr10	106040301	106040801
chr7	89881453	89881953
chr3	121521070	121521570
chr2	143904525	143905025
chr17	65972432	65972932
chr10	75028009	75028509
chr11	57505420	57505920
chr19	21481711	21482211
chr10	127323598	127324098
chr16	27387729	27388229
chr5	137394511	137395011
chr2	30056260	30056760
chr2	126968816	126969316
chr7	77693994	77694494
chr6	129154804	129155304
chr10	58866099	58866599
chr4	62040659	62041159
chr3	135138006	135138506
chr1	58948312	58948812
chr8	25538961	25539461
chr8	109666415	109666915
chr11	116713170	116713670
chr4	148013519	148014019
chr18	38670054	38670554
chr13	31270979	31271479
chr15	76340857	76341357
chr8	108073945	108074445
chr12	32871696	32872196
chr4	153668223	153668723
chr17	6638479	6638979
chr15	36516212	36516712
chr14	103501892	103502392
chr5	53584547	53585047
chr10	126348425	126348925
chr1	58659466	58659966
chr14	55007244	55007744
chr11	55878608	55879108
chr11	69659787	69660287
chr6	108654640	108655140
chr9	64041573	64042073
chr6	50308361	50308861
chr18	75456812	75457312
chr2	27103694	27104194
chr15	75693307	75693807
chr7	89920053	89920553
chr17	32672531	32673031
chr11	78244469	78244969
chr11	61864096	61864596
chr3	142002279	142002779
chr8	121964625	121965125
chr9	53661238	53661738
chr4	155477323	155477823
chr19	55926467	55926967
chr4	154862750	154863250
chr11	115614658	115615158
chr8	63654676	63655176
chr16	91413350	91413850
chr11	116290757	116291257
chr7	128105333	128105833
chr19	42593281	42593781
chr1	166296213	166296713
chr19	47054140	47054640
chr9	101186549	101187049
chr11	60201398	60201898
chr10	18183010	18183510
chr17	26753581	26754081
chr16	17526174	17526674
chr12	32871565	32872065
chr19	4497137	4497637
chr17	14365336	14365836
chr11	55883080	55883580
chr6	113049533	113050033
chr10	12446157	12446657
chr13	58590449	58590949
chr5	119434955	119435455
chr11	54749824	54750324
chr3	130966653	130967153
chr10	60230003	60230503
chr4	124467236	124467736
chr16	76226158	76226658
chr13	74239502	74240002
chr3	96379472	96379972
chr17	14312910	14313410
chr15	97776096	97776596
chr14	66701410	66701910
chr5	137778163	137778663
chr10	80596920	80597420
chr11	48650472	48650972
chr19	58019089	58019589
chr19	18894330	18894830
chr17	24985560	24986060
chr17	84537155	84537655
chr19	38265822	38266322
chr11	62437647	62438147
chr15	83104653	83105153
chr3	88397667	88398167
chr16	10452406	10452906
chr12	4849973	4850473
chr17	71443700	71444200
chr5	29445620	29446120
chr17	78672427	78672927
chr5	117816081	117816581
chr16	96304872	96305372
chr15	35225614	35226114
chr14	65252924	65253424
chr11	120962673	120963173
chr11	115138550	115139050
chr11	115320134	115320634
chr3	35598834	35599334
chr19	9112789	9113289
chr19	24289404	24289904
chr14	79250490	79250990
chr5	36060444	36060944
chr6	125295953	125296453
chr18	78050607	78051107
chr11	109563286	109563786
chr11	70035325	70035825
chr8	125098428	125098928
chr13	64445528	64446028
chr14	26313316	26313816
chr1	93339172	93339672
chr13	37853425	37853925
chr13	56731931	56732431
chr11	58418622	58419122
chr2	68698286	68698786
chr3	107666937	107667437
chr1	196486528	196487028
chr10	78056399	78056899
chr12	114984417	114984917
chr8	59968600	59969100
chr9	44480954	44481454
chr4	129808188	129808688
chr7	35010989	35011489
chr1	135773491	135773991
chr8	127175716	127176216
chr12	33129574	33130074
chr4	80519854	80520354
chr11	49074889	49075389
chr19	58821978	58822478
chr2	120230184	120230684
chr13	102701255	102701755
chr4	107739197	107739697
chr7	52578317	52578817
chr17	34614092	34614592
chr2	27245302	27245802
chr13	3925222	3925722
chr15	99696436	99696936
chr11	69237355	69237855
chr2	170282706	170283206
chr2	119055424	119055924
chr18	56635821	56636321
chr1	21062842	21063342
chr6	35253483	35253983
chr15	85063134	85063634
chr5	115482609	115483109
chr11	11828255	11828755
chr9	85233907	85234407
chr14	12451992	12452492
chr7	106310064	106310564
chr3	62262335	62262835
chr6	54856557	54857057
chr15	66896186	66896686
chr6	113589260	113589760
chr7	118035052	118035552
chr7	20537825	20538325
chr12	83174007	83174507
chr13	62959523	62960023
chr17	30554004	30554504
chr4	136018059	136018559
chr16	91552266	91552766
chr7	124613841	124614341
chr16	10472039	10472539
chr11	99466065	99466565
chr2	124429045	124429545
chr19	9998997	9999497
chr8	45790193	45790693
chr9	15105858	15106358
chr6	134674161	134674661
chr1	187435137	187435637
chr13	43100626	43101126
chr9	65256811	65257311
chr3	122114493	122114993
chr1	169284455	169284955
chr3	137956418	137956918
chr1	4774243	4774743
chr2	122061202	122061702
chr3	52299231	52299731
chr18	70084892	70085392
chr10	12639020	12639520
chr1	92953893	92954393
chr15	77224213	77224713
chr18	43891640	43892140
chr8	120227727	120228227
chr10	127442431	127442931
chr14	56354106	56354606
chr9	7967902	7968402
chr9	21031597	21032097
chr1	37355674	37356174
chr6	112243364	112243864
chr1	121427486	121427986
chr17	80337567	80338067
chr15	3178902	3179402
chr2	127549936	127550436
chr9	99037646	99038146
chr19	53333199	53333699
chr12	109927342	109927842
chr2	76336843	76337343
chr8	123319794	123320294
chr17	71551426	71551926
chr3	123230962	123231462
chr5	38871102	38871602
chr7	20195093	20195593
chr1	129111166	129111666
chr12	109487744	109488244
chr9	57398088	57398588
chr5	119141372	119141872
chr17	80527249	80527749
chr2	33216668	33217168
chr3	122467901	122468401
chr11	120809689	120810189
chr14	57849204	57849704
chr5	54378716	54379216
chr19	55763907	55764407
chr1	192743955	192744455
chr7	17507120	17507620
chr2	50911690	50912190
chr10	75257666	75258166
chr2	30263685	30264185
chr19	4836012	4836512
chr5	125080695	125081195
chr14	87872525	87873025
chr10	18564223	18564723
chr2	166463035	166463535
chr17	13600727	13601227
chr6	92169375	92169875
chr5	77251099	77251599
chr5	139323913	139324413
chr14	26555356	26555856
chr2	124424847	124425347
chr1	109593313	109593813
chr13	44544710	44545210
chr14	70574466	70574966
chr9	107778296	107778796
chr11	104254139	104254639
chr11	55030946	55031446
chr15	12136266	12136766
chr11	116072000	116072500
chr15	76026759	76027259
chr2	120444171	120444671
chr12	109273775	109274275
chr8	125313599	125314099
chr18	84819374	84819874
chr8	18951337	18951837
chr2	118993123	118993623
chr10	77606456	77606956
chr11	95682784	95683284
chr4	106280507	106281007
chr11	8526578	8527078
chr11	101228485	101228985
chr12	118697883	118698383
chr17	33925596	33926096
chr9	46008933	46009433
chr18	32213819	32214319
chr1	137242892	137243392
chr5	37117659	37118159
chr17	44282660	44283160
chr7	35691735	35692235
chr17	7015814	7016314
chr8	129117996	129118496
chr7	127316994	127317494
chr1	24809466	24809966
chr3	122293767	122294267
chr19	25340547	25341047
chr8	70534095	70534595
chr18	61657906	61658406
chr12	3919393	3919893
chr3	104599262	104599762
chr8	129355094	129355594
chr9	60165008	60165508
chr7	106375237	106375737
chr3	73529612	73530112
chr6	37347954	37348454
chr15	89207898	89208398
chr14	70144303	70144803
chr19	10050814	10051314
chr3	144397791	144398291
chr8	79031057	79031557
chr5	65252908	65253408
chr14	31425000	31425500
chr8	47227000	47227500
chr12	85255656	85256156
chr12	33776913	33777413
chr5	46424211	46424711
chr13	97994152	97994652
chr11	3882358	3882858
chr8	112470066	112470566
chr9	67107035	67107535
chr8	58824839	58825339
chr1	65039086	65039586
chr4	98584739	98585239
chr7	39002299	39002799
chr13	6048198	6048698
chr5	147611149	147611649
chr18	84854334	84854834
chr10	126587622	126588122
chr18	36721596	36722096
chr9	53916968	53917468
chr14	63856042	63856542
chr16	94749188	94749688
chr19	45056867	45057367
chr7	30038922	30039422
chr6	143063450	143063950
chr5	134894163	134894663
chr6	108379907	108380407
chr3	30491381	30491881
chr10	66550547	66551047
chr10	39626870	39627370
chr7	106986096	106986596
chr2	150726045	150726545
chr2	84735595	84736095
chr11	101213130	101213630
chr10	120821684	120822184
chr11	70322957	70323457
chr7	87142667	87143167
chr5	122306126	122306626
chr12	56572381	56572881
chr4	40086922	40087422
chr7	52578474	52578974
chr14	35401200	35401700
chr7	146487298	146487798
chr11	118843731	118844231
chr2	167170154	167170654
chr6	5516540	5517040
chr12	86768736	86769236
chr7	137739507	137740007
chr11	61191598	61192098
chr9	95715587	95716087
chr16	37584564	37585064
chr3	21254960	21255460
chr7	106363616	106364116
chr13	38213039	38213539
chr11	116998186	116998686
chr8	37098450	37098950
chr18	34682552	34683052
chr19	32555989	32556489
chr1	134980692	134981192
chr17	46131435	46131935
chr11	76292460	76292960
chr6	145881237	145881737
chr3	89085075	89085575
chr1	172496635	172497135
chr15	99795669	99796169
chr2	32340260	32340760
chr1	186706641	186707141
chr2	84596427	84596927
chr18	66586837	66587337
chr3	96882480	96882980
chr17	12985296	12985796
chr5	31135932	31136432
chr18	56355398	56355898
chr10	128397875	128398375
chr8	119857943	119858443
chr19	3645695	3646195
chr11	51581775	51582275
chr12	16663958	16664458
chr2	33224917	33225417
chr6	47256015	47256515
chr15	78707302	78707802
chr10	112453179	112453679
chr3	21817379	21817879
chr11	101443904	101444404
chr7	96473613	96474113
chr19	17485203	17485703
chr13	23858518	23859018
chr5	33080506	33081006
chr6	49299732	49300232
chr13	73907300	73907800
chr4	148766487	148766987
chr8	124900837	124901337
chr4	136943695	136944195
chr15	36405598	36406098
chr18	39401988	39402488
chr5	141130318	141130818
chr11	77978200	77978700
chr1	193469641	193470141
chr8	124929082	124929582
chr17	36220915	36221415
chr7	151305352	151305852
chr5	28381940	28382440
chr18	38092071	38092571
chr8	106899020	106899520
chr2	72591868	72592368
chr5	53499234	53499734
chr10	13703467	13703967
chr12	85265978	85266478
chr1	181516835	181517335
chr1	127385749	127386249
chr13	12548940	12549440
chr11	119622367	119622867
chr3	122571160	122571660
chr14	65144156	65144656
chr18	21264375	21264875
chr8	107257633	107258133
chr2	163484112	163484612
chr11	114537762	114538262
chr11	6208097	6208597
chr6	108436660	108437160
chr5	133070622	133071122
chr5	114360667	114361167
chr10	13702571	13703071
chr7	28378185	28378685
chr9	59550880	59551380
chr7	30281544	30282044
chr13	34830285	34830785
chr1	182687890	182688390
chr7	72629016	72629516
chr1	52806788	52807288
chr18	73705905	73706405
chr9	108898503	108899003
chr11	83970091	83970591
chr13	47287528	47288028
chr15	36811282	36811782
chr12	111673116	111673616
chr5	123247787	123248287
chr1	164445216	164445716
chr6	116276630	116277130
chr1	164743153	164743653
chr3	36405278	36405778
chr4	107906221	107906721
chr10	61692072	61692572
chr1	193664617	193665117
chr7	87853999	87854499
chr1	60636722	60637222
chr7	97249032	97249532
chr5	20890313	20890813
chr10	110231485	110231985
chr11	49953101	49953601
chr13	56565063	56565563
chr8	119858070	119858570
chr7	54085271	54085771
chr10	59149881	59150381
chr5	28536133	28536633
chr1	137079395	137079895
chr14	121901396	121901896
chr16	48422739	48423239
chr12	36952645	36953145
chr11	103550827	103551327
chr9	107473406	107473906
chr12	70614180	70614680
chr14	35115857	35116357
chr18	39712769	39713269
chr5	93000309	93000809
chr7	3268262	3268762
chr6	47712863	47713363
chr2	101500654	101501154
chr11	60748225	60748725
chr5	92527746	92528246
chr5	53475566	53476066
chr11	57507970	57508470
chr5	44213925	44214425
chr1	82812317	82812817
chr5	9108398	9108898
chr9	58076951	58077451
chr6	54334726	54335226
chr19	32166845	32167345
chr4	141416447	141416947
chr4	55781027	55781527
chr11	106638775	106639275
chr15	76526507	76527007
chr7	20261932	20262432
chr5	119524137	119524637
chr14	21009001	21009501
chr5	102259130	102259630
chr3	96369629	96370129
chr6	56762152	56762652
chr4	132687683	132688183
chr4	84850842	84851342
chr2	77341923	77342423
chr17	86692694	86693194
chr8	126244381	126244881
chr18	38367738	38368238
chr11	54752590	54753090
chr1	127346891	127347391
chr7	51950497	51950997
chr1	10187966	10188466
chr4	10851281	10851781
chr1	153154933	153155433
chr10	127058958	127059458
chr6	94339660	94340160
chr8	72596999	72597499
chr1	172815054	172815554
chr18	85075500	85076000
chr6	39214603	39215103
chr7	151008336	151008836
chr2	27574771	27575271
chr3	146070004	146070504
chr19	53333512	53334012
chr6	124643581	124644081
chr4	138550261	138550761
chr4	134281802	134282302
chr11	78661618	78662118
chr10	82339235	82339735
chr4	151502812	151503312
chr11	101342136	101342636
chr12	104943085	104943585
chr11	95891791	95892291
chr10	118440931	118441431
chr3	129920532	129921032
chr14	75049803	75050303
chr12	53419390	53419890
chr4	132996114	132996614
chr8	74693820	74694320
chr8	122192190	122192690
chr14	55005945	55006445
chr9	106073717	106074217
chr1	9738644	9739144
chr10	66384120	66384620
chr5	66395341	66395841
chr10	17954277	17954777
chr6	122575114	122575614
chr12	112217907	112218407
chr3	28461679	28462179
chr3	79091646	79092146
chr11	118849178	118849678
chr10	127386498	127386998
chr2	166462679	166463179
chr4	120189081	120189581
chr8	72493428	72493928
chr5	51975311	51975811
chr2	112138239	112138739
chr2	145687765	145688265
chr7	135175784	135176284
chr1	95589243	95589743
chr15	55070323	55070823
chr2	92285885	92286385
chr4	59209508	59210008
chr4	140864270	140864770
chr11	21449922	21450422
chr18	61489767	61490267
chr7	20451718	20452218
chr5	97369641	97370141
chr4	118189307	118189807
chr3	142407466	142407966
chr12	88430629	88431129
chr10	95106678	95107178
chr11	60169289	60169789
chr5	93469033	93469533
chr8	118048990	118049490
chr14	70733297	70733797
chr12	82908971	82909471
chr11	94619050	94619550
chr11	86205196	86205696
chr13	24972500	24973000
chr8	93349161	93349661
chr17	74794509	74795009
chr6	85879256	85879756
chr11	48903541	48904041
chr7	63383381	63383881
chr4	55731199	55731699
chr3	28594369	28594869
chr10	79285708	79286208
chr9	97681155	97681655
chr2	150727807	150728307
chr12	85049420	85049920
chr16	56721074	56721574
chr1	60883857	60884357
chr1	192853728	192854228
chr4	6279935	6280435
chr3	71078156	71078656
chr2	151404848	151405348
chr11	69780045	69780545
chr5	124454572	124455072
chr16	48422570	48423070
chr16	91703111	91703611
chr5	101061654	101062154
chr2	60122445	60122945
chr17	85278386	85278886
chr17	28980497	28980997
chr11	120919276	120919776
chr4	45797408	45797908
chr4	132677898	132678398
chr1	107233936	107234436
chr10	62618392	62618892
chr8	56208587	56209087
chr1	159455981	159456481
chr8	14996577	14997077
chr7	29710377	29710877
chr7	106858943	106859443
chr16	24392544	24393044
chr7	53014853	53015353
chr12	92415542	92416042
chr3	130535893	130536393
chr4	133617005	133617505
chr15	64165163	64165663
chr13	24972067	24972567
chr19	5887168	5887668
chr17	56146767	56147267
chr16	38294572	38295072
chr3	31025632	31026132
chr5	46573381	46573881
chr7	54085473	54085973
chr10	7551826	7552326
chr4	129554991	129555491
chr10	77788912	77789412
chr7	134414225	134414725
chr4	34999446	34999946
chr10	19309431	19309931
chr10	97477795	97478295
chr1	167495399	167495899
chr19	12078904	12079404
chr9	119152999	119153499
chr10	76492418	76492918
chr13	38262643	38263143
chr4	55028251	55028751
chr10	127140315	127140815
chr10	24354914	24355414
chr11	115745608	115746108
chr2	141114096	141114596
chr10	127212907	127213407
chr11	96891122	96891622
chr2	13445201	13445701
chr5	97485699	97486199
chr13	58590272	58590772
chr5	53465801	53466301
chr18	61177567	61178067
chr19	24757756	24758256
chr10	66384921	66385421
chr11	78370691	78371191
chr5	44389449	44389949
chr19	4817210	4817710
chr8	119924709	119925209
chr19	6171257	6171757
chr16	91928374	91928874
chr9	25357667	25358167
chr5	31211544	31212044
chr8	118806253	118806753
chr6	72540111	72540611
chr7	142713280	142713780
chr9	57816821	57817321
chr2	174264166	174264666
chr10	127717875	127718375
chr10	8524834	8525334
chr3	132477671	132478171
chr5	38889445	38889945
chr18	61796691	61797191
chr3	145305814	145306314
chr5	31250919	31251419
chr17	7587356	7587856
chr14	51768705	51769205
chr3	137794182	137794682
chr2	38341376	38341876
chr17	13502137	13502637
chr7	54088582	54089082
chr14	51576679	51577179
chr11	101217163	101217663
chr9	65744798	65745298
chr4	83269568	83270068
chr6	85087130	85087630
chr2	126494592	126495092
chr10	77092611	77093111
chr17	74299344	74299844
chr1	67158136	67158636
chr2	165109103	165109603
chr15	76447903	76448403
chr16	76865981	76866481
chr6	128704972	128705472
chr8	122052542	122053042
chr9	14038424	14038924
chr11	120201483	120201983
chr2	32326562	32327062
chr11	53572343	53572843
chr9	119266406	119266906
chr13	55492914	55493414
chr6	5943209	5943709
chr14	63967071	63967571
chr6	40744970	40745470
chr11	90219295	90219795
chr2	76255427	76255927
chr15	100585686	100586186
chr10	66391283	66391783
chr8	118665221	118665721
chr5	129600080	129600580
chr1	184494823	184495323
chr4	120607549	120608049
chr6	72534039	72534539
chr3	21255156	21255656
chr7	20415873	20416373
chr9	123395716	123396216
chr8	64388086	64388586
chr13	97945756	97946256
chr18	66662289	66662789
chr4	118199385	118199885
chr6	47256228	47256728
chr13	13952925	13953425
chr5	28216253	28216753
chr5	144846505	144847005
chr9	85383940	85384440
chr11	71012841	71013341
chr4	87516385	87516885
chr10	125401608	125402108
chr16	96584518	96585018
chr13	112357201	112357701
chr6	54068819	54069319
chr2	75561521	75562021
chr5	135024171	135024671
chr6	83157903	83158403
chr13	6640784	6641284
chr3	84066716	84067216
chr9	40273102	40273602
chr2	168548182	168548682
chr5	119143465	119143965
chr14	66890336	66890836
chr9	85302096	85302596
chr2	135225475	135225975
chr6	143100744	143101244
chr12	87036622	87037122
chr5	135478047	135478547
chr9	62956948	62957448
chr2	101649689	101650189
chr5	135123127	135123627
chr10	51951930	51952430
chr16	3965412	3965912
chr5	73101161	73101661
chr10	98689090	98689590
chr11	98441460	98441960
chr5	109089193	109089693
chr12	40661378	40661878
chr11	5637022	5637522
chr4	134045878	134046378
chr10	95997069	95997569
chr11	21327507	21328007
chr6	137519028	137519528
chr8	13913857	13914357
chr18	24287584	24288084
chr11	53236494	53236994
chr15	81702432	81702932
chr14	27116483	27116983
chr15	96391294	96391794
chr4	137924051	137924551
chr2	163400167	163400667
chr2	152565341	152565841
chr12	7984168	7984668
chr8	122929871	122930371
chr3	108723674	108724174
chr1	37556263	37556763
chr4	57143418	57143918
chr17	86734213	86734713
chr16	91255918	91256418
chr19	30016693	30017193
chr9	107778434	107778934
chr17	84424521	84425021
chr3	107679901	107680401
chr5	65089846	65090346
chr9	95715993	95716493
chr8	13897346	13897846
chr13	55423889	55424389
chr13	35057347	35057847
chr19	4420464	4420964
chr11	115541192	115541692
[truncated: 1,966 more rows]
