# Supplementary material for: Microbiota regulate intestinal epithelial gene expression by suppressing the transcription factor Hepatocyte nuclear factor 4 alpha
Source: Genome Res. 2017 Jul;27(7):1195–206. doi: 10.1101/gr.220111.116 (PMC5495071; doi:10.1101/gr.220111.116)
Supplement: Supplemental Material [file supp_gr.220111.116_Supplemental_Table_S9.xlsx]

## Sheet: Supplemental Table S9
Supplemental Table S9: Primers and Oligos
Primer name	Sequence
ChIP-PCR Primers					Genomic Location
Agrp_CTCF_F	CAAGGAGTACGCCGCAAGAAGTG				8:105622531-105622553
Agrp_CTCF_R	CCACAACCTAAAGTTGCTTCTTGAG				8:105622650-105622674
Slc44a3_CTCF_F	CTCAAAGGATCAAGGACTGCAG				3:121500329-121500350
Slc44a3_CTCF_R	GATCTTGCCTGCACCAACACAG				3:121500449-121500470
Rilp_CTCF_F	GAAGCCAAGAGACCGAAGCGGTGAG				11:75510719-75510743
Rilp_CTCF_R	GATCAGCAGGAGGCGCTGTAGCTG				11:75510831-75510854
Inf2_CTCF_F	GTAGCTACCATAGTCTTATCTAAG				12:112605998-112606021
Inf2_CTCF_R	GCTGTCTTCCCTTGACTTGG				12:112606087-112606106
Mm_Neurog1_F	GGCTACATTTGGTCTTTATCC				13:56247085-56247105
Mm_Neurog1_R	GTGGAGCCAAGCTAACAATTTGC				13:56247171-56247193
Mm_Apoa1_F	CTAGGGAGTTGGGGAGTTTCCT				9:46227267-46227288
Mm_Apoa1_R	TCTCTCAGCCTTAGAGGCAAGG				9:46227355-46227376
Mm_Angptl4_F	ATCTAATCTACAGTCCATATTCCAC				17:33788903-33788927
Mm_Angptl4_R	AGGGCATCAATGCAAAGTGCAGTG				17:33788988-33789011
Mm_Pck1_F	CCAGGTTGCAGAAAGGAGTGTC				2:173138399-173138420
Mm_Pck1_R	AGAATGTGGTAAACAGGACTCAAG				2:173138479-173138502
qRT-PCR Primers
hnf4a2.1 F	CAGTGTCGGTACTGCAGACTAAAG
hnf4a2.1 R	GTGAGCTCGCAGTAAAGCCACCTG
hnf4b1.1 F	AGACCGAGCCACTGGAAAAC
hnf4b1.1 R	CATGTGTAGGCATGGTTCTTG
hnf4g2.1 F	ATGAAGTTTTCTCCAACTCCTCTCC
hnf4g2.1 R	CTGCTGTGAAAGTGCTTCAGCGTGAGC
saa F	CGCAGAGGCAATTCAGAT
saa R	CAGGCCTTTAAGTCTGTATTTGTTG
gfp F	GAAGAAGTCGTGCTGCTTCA
gfp R	CCTGAAGTTCATCTGCACCA
angptl4 F	CGAGCGCATCAAGCAACA
angptl4 R	TCGCTCGTTTTTCATCGTAATCT
ifabp F	TGCCCATGACAACCTGAAGA
ifabp R	GTTAATTTCCAGTGTGCGGAAAG
18S F	CACTTGTCCCTCTAAGAAGTTGCA
18S R	GGTTGATTCCGATAACGAACGA
elf1a F	CTTCTCAGGCTGACTGTGC
elf1a R	CCGCTAGGATTACCCTCC
Primers for Yeast-1-Hybrid Screen
in3.4 F	AAAAGAGCTCCCTTGTAGGCTGTTGGAAATAC
in3.4 R	AAAACTCGAGACTGAAAGACACAAACACA
hnf4a_pENTR F	CCGCCCCCTTCACCATGGAGATGGCAGACTATAGCGAG
hnf4a R	TCGGCGCGCCCACCCTTTCAGATGGCCTCTTGTTTAGTG
hnf4g F	CCGCCCCCTTCACCATGGATGTAGCCAATTACTGCGA
hnf4g R	TCGGCGCGCCCACCCTTTCATAGCGGGGGCTCCGGAGA
Oligos for guide RNAs
hnf4a_gRNA F 1	TAGGGCACCAGAAGATCCAGCTATG
hnf4a_gRNA R 1	AAACCATAGCTGGATCTTCTGGTGC
hnf4a_gRNA F 3	TAGGGTAAGCTGCTGTCCTCATAGC
hnf4a_gRNA R 3	AAACGCTATGAGGACAGCAGCTTAC
hnf4a_gRNA F 4	TAGGGTCCTCATAGCTGGATCTTC
hnf4a_gRNA R 4	AAACGAAGATCCAGCTATGAGGAC
Primers for Hnf4a mutation screening
hnf4a_Cris_checkF	TGATTCACACTACTTACTTGTCTAG
hnf4a_Cris_checkR	GATTAAAAGTAGTTATCTCATCCTCAG
